# Supplementary material for: Data on fossil fuel availability for Shared Socioeconomic Pathways
Source: Data Brief. 2016 Nov 18;10:44–6. doi: 10.1016/j.dib.2016.11.043 (PMC5137328; doi:10.1016/j.dib.2016.11.043)
Supplement: Supplementary file 1 — Supplementary material [file mmc1.zip]

Archive with 7 entries (7 files):
- Sferra_doc03679220160610172715.pdf
- Brecha_Document scanned by a Xerox scanner at PIK.pdf
- Edmonds - Conflict of Interest Signed Ltr.pdf
- Hilaire_Scan_PRT-second-floor_2099_001.pdf
- Kejun_AUTHOR DECLARATION TEMPLATE.pdf
- Kriegler_Example_Conflict of Interest Form.pdf
- Rogner_Conflict of Interest Form_hhr.pdf
