# Supplementary material for: Data on fossil fuel availability for Shared Socioeconomic Pathways
Source: Data Brief. 2016 Nov 18;10:44–6. doi: 10.1016/j.dib.2016.11.043 (PMC5137328; doi:10.1016/j.dib.2016.11.043)
Supplement: Supplementary file 2 — Supplementary material [file mmc2.xlsx]

## Sheet: Coal data summary
	Reservoir type	Reserves/ Resources	Quantity		Cost
			Value (EJ)	Assumption	Value ($US/GJ)	Assumption
COAL	Hard coal	Reserves	18244	Sources: GEA	1.20-12.00	ETSAP; GEA		Note: these amounts start with the GEA reserves data
		Resources	0	Sources: GEA	NA	-		Losses in the mining process (GEA, p. 462) of 10% for surface mining and 50% for underground mining are not taken into account here
	Sub-total
	Lignite	Reserves	2549	Sources: GEA	1.40-8.00	ETSAP; GEA
		Resources	0	Sources: GEA	NA
	Sub-total
	Total
	LEGEND
	RR	Recovery rate

## Sheet: Coal resource
		GEA Reserves and Resources data																Recoverable reserves amounts																			Recoverable resources amounts
																		Hard coal										Lignite									Hard coal resource											Lignite resource
#	Region code	Hard coal									Lignite							0.6	0.8	1	1.3	1.6	2.2	2.8	4.4	6		0.7	0.95	1.2	1.5	1.8	2.8	3.8			6	7	8	9.5	11	12.5	14.5	16.5	18			3.5	4
																			0.5	0.5	0.75	0.25	0	0	0	0			0.75	0.25	0.75	0.25	0	0
		Reserves (EJ)	Surface (EJ)	Underground (EJ)	C I	C II	C III	C IV	Total	Resources (EJ)	Reserves (EJ)	B I	B II	B III	Total	Resources (EJ)		CI			CII		CIII		CIV			BI			BII		BIII				25% of resource; 20% recovery rate			25% of resource; 10% recovery rate			50% of resource; 5% recovery rate			Total		25% of resource; 50% recovery
1	USA	5856	2342	3514	3924	1347	586	0	5857		333.9	186	186	0	372			0	1962	1962	1010.25	336.75	0	0	0	0		0	139.5	46.5	139.5	46.5	0	0			0	0	0	0	0	0	0	0	0	0		0	0
2	CAN	109	82	27	64	29	18	0	111		24.3	21	5	0	26			0	32	32	21.75	7.25	0	0	0	0		0	15.75	5.25	3.75	1.25	0	0			0	0	0	0	0	0	0	0	0	0		0	0
3	WEU	67	0	67	0	11	34	22	67		378.9	253	126	42	421			0	0	0	8.25	2.75	0	0	0	0		0	189.75	63.25	94.5	31.5	0	0			0	0	0	0	0	0	0	0	0	0		0	0
4	EEU	457	32	425	32	32	197	197	458		178.2	99	60	40	199			0	16	16	24	8	0	0	0	0		0	74.25	24.75	45	15	0	0			0	0	0	0	0	0	0	0	0	0		0	0
5	FSU	3306	694	2612	298	926	1455	628	3307		933.3	622	311	104	1037			0	149	149	694.5	231.5	0	0	0	0		0	466.5	155.5	233.25	77.75	0	0			0	0	0	0	0	0	0	0	0	0		0	0
6	NAF	2	1	1	0	1	1	0	2		0	0	0	0	0			0	0	0	0.75	0.25	0	0	0	0		0	0	0	0	0	0	0			0	0	0	0	0	0	0	0	0	0		0	0
7	EAF	0	0	0	0	0	0	0	0		0	0	0	0	0			0	0	0	0	0	0	0	0	0		0	0	0	0	0	0	0			0	0	0	0	0	0	0	0	0	0		0	0
8	WCA	8	4	4	2	2	2	2	8		0	0	0	0	0			0	1	1	1.5	0.5	0	0	0	0		0	0	0	0	0	0	0			0	0	0	0	0	0	0	0	0	0		0	0
9	SAF	757	144	613	287	212	204	53	756		0	0	0	0	0			0	143.5	143.5	159	53	0	0	0	0		0	0	0	0	0	0	0			0	0	0	0	0	0	0	0	0	0		0	0
10	MEE	10	2	8	0	3	4	3	10		0	0	0	0	0			0	0	0	2.25	0.75	0	0	0	0		0	0	0	0	0	0	0			0	0	0	0	0	0	0	0	0	0		0	0
11	CHN	4387	965	3422	1579	1623	965	219	4386		95.4	32	32	43	107			0	789.5	789.5	1217.25	405.75	0	0	0	0		0	24	8	24	8	0	0			0	0	0	0	0	0	0	0	0	0		0	0
12	OEA	119	45	74	38	19	34	27	118		18	10	10	0	20			0	19	19	14.25	4.75	0	0	0	0		0	7.5	2.5	7.5	2.5	0	0			0	0	0	0	0	0	0	0	0	0		0	0
13	IND	1855	612	1243	612	1021	223	0	1856		37.8	29	13	0	42			0	306	306	765.75	255.25	0	0	0	0		0	21.75	7.25	9.75	3.25	0	0			0	0	0	0	0	0	0	0	0	0		0	0
14	OSA	11	7	4	9	2	0	0	11		25.2	14	14	0	28			0	4.5	4.5	1.5	0.5	0	0	0	0		0	10.5	3.5	10.5	3.5	0	0			0	0	0	0	0	0	0	0	0	0		0	0
15	JPN	9	1	8	0	2	4	3	9		0	0	0	0	0			0	0	0	1.5	0.5	0	0	0	0		0	0	0	0	0	0	0			0	0	0	0	0	0	0	0	0	0		0	0
16	OCN	983	236	747	609	373	0	0	982		383.4	213	213	0	426			0	304.5	304.5	279.75	93.25	0	0	0	0		0	159.75	53.25	159.75	53.25	0	0			0	0	0	0	0	0	0	0	0	0		0	0
17	PAS	56	48	8	48	2	3	3	56		42.3	24	24	0	48			0	24	24	1.5	0.5	0	0	0	0		0	18	6	18	6	0	0			0	0	0	0	0	0	0	0	0	0		0	0
18	LAC	252	43	209	48	126	66	13	253		45.9	26	26	0	52			0	24	24	94.5	31.5	0	0	0	0		0	19.5	6.5	19.5	6.5	0	0			0	0	0	0	0	0	0	0	0	0		0	0
19	SOO
20	ARC
	SUB-TOTAL
	TOTAL	18244	5258	12986	7550	5731	3796	1170	18247		2496.6	1529	1020	229	2778			0	3775	3775	4298.25	1432.75	0	0	0	0	13281	0	1146.75	382.25	765	255	0	0	2549		0	0	0	0	0	0	0	0	0	0		0	0
	Note:	Start by assuming that all of the reserves are available																	Note:	The quantity in each cost category is the result of taking the fraction of each type (surface, underground) of the total resource and multiplying that by the reserves values (Columns D and E)
[truncated: 8 more columns]

## Sheet: Coal - Production costs
	Coal production costs data									Assumptions
#	Coal type	Category	Regional distinction	Production costs ($/GJ)		# cost bins				#	Reservoir type	Category	Regional distinction	GEA extraction costs ($/GJ)		# cost bins	Cost multiplier	Cost mark-up ($/GJ)	C
				Min	Max									Min	Max
1	Hard coal	Reserves	all	1.2	12	4				1	Hard coal	Reserves	all	1.2	12	4	1	1	2
2		Resources	all	NA	NA					2		Resources	all	NA	NA
3	Lignite	Reserves	all	1.4	8	4				3	Lignite	Reserves	all	1.4	8	4	0	1	2
4		Resources	all	NA	NA					4		Resources	all	NA	NA
										C stands for comments (see below)
	Use GEA cost data									Comments
										#	Reference	Comment
										1
										2		Cost markup represents approximately $10/tCO2
										References are listed in tab 'References' - Grey cells indicate default GEA assumptions/data - EJ: Expert judgement

## Sheet: Supply cost curves
			1.9	2.2	2.5	3.6	4.2	5.4	6.6	9.8	13		2.05	2.425	2.8	4	4.6	6.6	8.6
			0	3775	3775	4298.25	1432.75	0	0	0	0		0	1146.75	382.25	765	255	0	0
			0	3775	7550	11848.2	13281	13281	13281	13281	13281		0	1146.75	1529	2294	2549	2549	2549
