# Supplementary material for: Data on fossil fuel availability for Shared Socioeconomic Pathways
Source: Data Brief. 2016 Nov 18;10:44–6. doi: 10.1016/j.dib.2016.11.043 (PMC5137328; doi:10.1016/j.dib.2016.11.043)
Supplement: Supplementary file 3 — Supplementary material [file mmc3.xlsx]

## Sheet: Coal data summary
	Reservoir type	Reserves/ Resources	Quantity		Cost
			Value (EJ)	Assumption	Value ($US/GJ)	Assumption
COAL	Hard coal	Reserves	18247	Sources: GEA	1.20-12.00	ETSAP; GEA		Note: these amounts start with the GEA reserves data
		Resources	30306.6	Sources: GEA	12.00-36.00	-		Losses in the mining process (GEA, p. 462) of 10% for surface mining and 50% for underground mining are not taken into account here
	Sub-total
	Lignite	Reserves	2778	Sources: GEA	1.40-8.00	ETSAP; GEA
		Resources	5950.1	Sources: GEA	8.00-24.00
	Sub-total
	Total
	LEGEND
	RR	Recovery rate

## Sheet: Coal resource
		GEA Reserves and Resources data																Recoverable reserves amounts																			Recoverable resources amounts
																		Hard coal										Lignite									Hard coal resource											Lignite resource
#	Region code	Hard coal									Lignite							1.2	2	3	4	5.5	6.5	8	10	12		1.4	2	3	4	5	6	8			12	14	16	19	22	25	28	32	36			7	8.5
																			0.33	0.67	0.33	0.67	0.33	0.67	0.33	0.67			0.33	0.67	0.33	0.67	0.33	0.67
		Reserves (EJ)	Surface (EJ)	Underground (EJ)	C I	C II	C III	C IV	Total	Resources (EJ)	Reserves (EJ)	B I	B II	B III	Total	Resources (EJ)		CI			CII		CIII		CIV			BI			BII		BIII				10% of resource; 20% recovery rate			25% of resource; 10% recovery rate			65% of resource; 5% recovery rate			Total		10% of resource; 33% recovery
1	USA	5856	2342	3514	3924	1347	586	0	5857	163816	333.9	186	186	0	372	14743.8		0	1294.92	2629.08	444.51	902.49	193.38	392.62	0	0		0	61.38	124.62	61.38	124.62	0	0			1092.11	1092.11	1092.11	1365.13	1365.13	1365.13	1774.67	1774.67	1774.67	12695.7		162.182	162.182
2	CAN	109	82	27	64	29	18	0	111	3560	24.3	21	5	0	26	549		0	21.12	42.88	9.57	19.43	5.94	12.06	0	0		0	6.93	14.07	1.65	3.35	0	0			23.7333	23.7333	23.7333	29.6667	29.6667	29.6667	38.5667	38.5667	38.5667	275.9		6.039	6.039
3	WEU	67	0	67	0	11	34	22	67	7416	378.9	253	126	42	421	404.1		0	0	0	3.63	7.37	11.22	22.78	7.26	14.74		0	83.49	169.51	41.58	84.42	13.86	28.14			49.44	49.44	49.44	61.8	61.8	61.8	80.34	80.34	80.34	574.74		4.4451	4.4451
4	EEU	457	32	425	32	32	197	197	458	5192	178.2	99	60	40	199	2164.5		0	10.56	21.44	10.56	21.44	65.01	131.99	65.01	131.99		0	32.67	66.33	19.8	40.2	13.2	26.8			34.6133	34.6133	34.6133	43.2667	43.2667	43.2667	56.2467	56.2467	56.2467	402.38		23.8095	23.8095
5	FSU	3306	694	2612	298	926	1455	628	3307	76947	933.3	622	311	104	1037	12783.6		0	98.34	199.66	305.58	620.42	480.15	974.85	207.24	420.76		0	205.26	416.74	102.63	208.37	34.32	69.68			512.98	512.98	512.98	641.225	641.225	641.225	833.593	833.593	833.593	5963.39		140.62	140.62
6	NAF	2	1	1	0	1	1	0	2	10	0	0	0	0	0	0.36		0	0	0	0.33	0.67	0.33	0.67	0	0		0	0	0	0	0	0	0			0.0666667	0.0666667	0.0666667	0.0833333	0.0833333	0.0833333	0.108333	0.108333	0.108333	0.775		0.00396	0.00396
7	EAF	0	0	0	0	0	0	0	0	22	0	0	0	0	0	0.36		0	0	0	0	0	0	0	0	0		0	0	0	0	0	0	0			0.146667	0.146667	0.146667	0.183333	0.183333	0.183333	0.238333	0.238333	0.238333	1.705		0.00396	0.00396
8	WCA	8	4	4	2	2	2	2	8	72	0	0	0	0	0	2.34		0	0.66	1.34	0.66	1.34	0.66	1.34	0.66	1.34		0	0	0	0	0	0	0			0.48	0.48	0.48	0.6	0.6	0.6	0.78	0.78	0.78	5.58		0.02574	0.02574
9	SAF	757	144	613	287	212	204	53	756	1178	0	0	0	0	0	0		0	94.71	192.29	69.96	142.04	67.32	136.68	17.49	35.51		0	0	0	0	0	0	0			7.85333	7.85333	7.85333	9.81667	9.81667	9.81667	12.7617	12.7617	12.7617	91.295		0	0
10	MEE	10	2	8	0	3	4	3	10	1125	0	0	0	0	0	0		0	0	0	0.99	2.01	1.32	2.68	0.99	2.01		0	0	0	0	0	0	0			7.5	7.5	7.5	9.375	9.375	9.375	12.1875	12.1875	12.1875	87.1875		0	0
11	CHN	4387	965	3422	1579	1623	965	219	4386	121693	95.4	32	32	43	107	2669.4		0	521.07	1057.93	535.59	1087.41	318.45	646.55	72.27	146.73		0	10.56	21.44	10.56	21.44	14.19	28.81			811.287	811.287	811.287	1014.11	1014.11	1014.11	1318.34	1318.34	1318.34	9431.21		29.3634	29.3634
12	OEA	119	45	74	38	19	34	27	118	1298	18	10	10	0	20	2776.5		0	12.54	25.46	6.27	12.73	11.22	22.78	8.91	18.09		0	3.3	6.7	3.3	6.7	0	0			8.65333	8.65333	8.65333	10.8167	10.8167	10.8167	14.0617	14.0617	14.0617	100.595		30.5415	30.5415
13	IND	1855	612	1243	612	1021	223	0	1856	3954	37.8	29	13	0	42	296.1		0	201.96	410.04	336.93	684.07	73.59	149.41	0	0		0	9.57	19.43	4.29	8.71	0	0			26.36	26.36	26.36	32.95	32.95	32.95	42.835	42.835	42.835	306.435		3.2571	3.2571
14	OSA	11	7	4	9	2	0	0	11	83	25.2	14	14	0	28	1577.7		0	2.97	6.03	0.66	1.34	0	0	0	0		0	4.62	9.38	4.62	9.38	0	0			0.553333	0.553333	0.553333	0.691667	0.691667	0.691667	0.899167	0.899167	0.899167	6.4325		17.3547	17.3547
15	JPN	9	1	8	0	2	4	3	9	297	0	0	0	0	0	9.9		0	0	0	0.66	1.34	1.32	2.68	0.99	2.01		0	0	0	0	0	0	0			1.98	1.98	1.98	2.475	2.475	2.475	3.2175	3.2175	3.2175	23.0175		0.1089	0.1089
16	OCN	983	236	747	609	373	0	0	982	2696	383.4	213	213	0	426	1548		0	200.97	408.03	123.09	249.91	0	0	0	0		0	70.29	142.71	70.29	142.71	0	0			17.9733	17.9733	17.9733	22.4667	22.4667	22.4667	29.2067	29.2067	29.2067	208.94		17.028	17.028
17	PAS	56	48	8	48	2	3	3	56	941	42.3	24	24	0	48	495.9		0	15.84	32.16	0.66	1.34	0.99	2.01	0.99	2.01		0	7.92	16.08	7.92	16.08	0	0			6.27333	6.27333	6.27333	7.84167	7.84167	7.84167	10.1942	10.1942	10.1942	72.9275		5.4549	5.4549
18	LAC	252	43	209	48	126	66	13	253	753	45.9	26	26	0	52	181.8		0	15.84	32.16	41.58	84.42	21.78	44.22	4.29	8.71		0	8.58	17.42	8.58	17.42	0	0			5.02	5.02	5.02	6.275	6.275	6.275	8.1575	8.1575	8.1575	58.3575		1.9998	1.9998
19	SOO
20	ARC
	SUB-TOTAL
	TOTAL	18244	5258	12986	7550	5731	3796	1170	18247	391053	2496.6	1529	1020	229	2778	40203.4		0	2491.5	5058.5	1891.23	3839.77	1252.68	2543.32	386.1	783.9	18247	0	504.57	1024.43	336.6	683.4	75.57	153.43	2778		2607.02	2607.02	2607.02	3258.78	3258.78	3258.78	4236.41	4236.41	4236.41	30306.6		442.237	442.237
	Note:	Start by assuming that all of the reserves are available																	Note:	The quantity in each cost category is the result of taking the fraction of each type (surface, underground) of the total resource and multiplying that by the reserves values (Columns D and E)
[truncated: 8 more columns]

## Sheet: Coal - Production costs
	Coal production costs data									Assumptions
#	Coal type	Category	Regional distinction	Production costs ($/GJ)		# cost bins				#	Reservoir type	Category	Regional distinction	GEA extraction costs ($/GJ)		# cost bins	Cost multiplier	Cost mark-up ($/GJ)	C
				Min	Max									Min	Max
1	Hard coal	Reserves	all	1.2	12					1	Hard coal	Reserves	all	0.6	6		2	0
2		Resources	all	12	36					2		Resources	all	6	18		2	0	1
3	Lignite	Reserves	all	1.4	8					3	Lignite	Reserves	all	0.7	4		2	0
4		Resources	all	8	24					4		Resources	all	4	12		2	0	1
										C stands for comments (see below)
	Use GEA cost data									Comments
										#	Reference	Comment
										1
										2
										References are listed in tab 'References' - Grey cells indicate default GEA assumptions/data - EJ: Expert judgement

## Sheet: Supply cost curves
1.2	2	3	4	5.5	6.5	8	10	12	12	14	16	19	22	25	28	32	36		1.4	2	3	4	5	6	7	8	8.5	10	12	14	16	18	21	24
0	2491.5	5058.5	1891.23	3839.77	1252.68	2543.32	386.1	6517.55	783.9	6517.55	6517.55	3258.78	3258.78	3258.78	3258.78	3258.78	3258.78		0	504.57	1024.43	336.6	683.4	75.57	442.237	153.43	442.237	442.237	670.056	670.056	670.056	871.073	871.073	871.073
0	2491.5	7550	9441.23	13281	14533.7	17077	17463.1	23980.6	24764.5	31282.1	37799.7	41058.4	44317.2	47576	50834.8	54093.5	57352.3		0	504.57	1529	1865.6	2549	2624.57	3066.81	3220.24	3662.47	4104.71	4774.77	5444.82	6114.88	6985.95	7857.02	8728.1
		0	12	14	16	19	22	25	28	32		36
			2607.02	2607.02	2607.02	3258.78	3258.78	3258.78	4236.41	4236.41		4236.41
		24764.5	27371.6	29978.6	32585.6	35844.4	39103.2	42361.9	46598.3	50834.8		55071.2
