# Supplementary material for: Data on fossil fuel availability for Shared Socioeconomic Pathways
Source: Data Brief. 2016 Nov 18;10:44–6. doi: 10.1016/j.dib.2016.11.043 (PMC5137328; doi:10.1016/j.dib.2016.11.043)
Supplement: Supplementary file 5 — Supplementary material [file mmc5.xlsx]

## Sheet: Coal data summary
	Reservoir type	Reserves/ Resources	Quantity		Cost
			Value (EJ)	Assumption	Value ($US/GJ)	Assumption
COAL	Hard coal	Reserves	13218.6	Sources: GEA	0.90-9.00	ETSAP; GEA		Note: these amounts start with the GEA reserves data
		Resources	20807.6	Sources: GEA	9.00-27.00	-		Losses in the mining process (GEA, p. 462) of 10% for surface mining and 50% for underground mining are not taken into account here
	Sub-total
	Lignite	Reserves	1909	Sources: GEA	1.05-6.00	ETSAP; GEA
		Resources	2078.41	Sources: GEA	6.00-18.00
	Sub-total
	Total
	LEGEND
	RR	Recovery rate

## Sheet: Coal resource
		GEA Reserves and Resources data																Recoverable reserves amounts																			Recoverable resources amounts
																		Hard coal										Lignite									Hard coal resource											Lignite resource
#	Region code	Hard coal									Lignite							0.9	1.2	1.5	1.95	2.4	3.3	4.2	6.6	9		1.05	1.45	1.8	2.25	2.7	4.2	6			8	10	12	14	16	18	21	24	27			5	6
																			0.5	0.5	0.5	0.5	0	0	0	0			0.5	0.5	0	0	0	0			0	0	0	0	0	0	0	0	0			0	0
		Reserves (EJ)	Surface (EJ)	Underground (EJ)	C I	C II	C III	C IV	Total	Resources (EJ)	Reserves (EJ)	B I	B II	B III	Total	Resources (EJ)		1.2	2	3	4	5.5	6.5	8	10	12		1.4	2	3	4	5	6	8			11	13.5	16	19	22	25	28	32	36			7	8.5
																			0.33	0.67	0.33	0.5	0.25	0.25	0.25	0.25			0.33	0.67	0.33	0.67	0	0
																		CI			CII		CIII		CIV		Total		BI		BII		BIII		Total		25% of resource; 20% recovery rate			25% of resource; 10% recovery rate			50% of resource; 5% recovery rate					25% of resource; 20% recovery
1	USA	5856	2342	3514	3924	1347	586	0	5857	163816	333.9	186	186	0	372	14743.8		0	1962	1962	673.5	673.5	0	0	0	0	5271	0	93	93	0	0	0	0	186		0	0	0	0	0	0	0	0	0	0		0	0
2	CAN	109	82	27	64	29	18	0	111	3560	24.3	21	5	0	26	549		0	32	32	14.5	14.5	0	0	0	0	93	0	10.5	10.5	0	0	0	0	21		0	0	0	0	0	0	0	0	0	0		0	0
3	WEU	67	0	67	0	11	34	22	67	7416	378.9	253	126	42	421	404.1		0	0	0	5.5	5.5	0	0	0	0	11	0	126.5	126.5	0	0	0	0	253		0	0	0	0	0	0	0	0	0	0		0	0
4	EEU	457	32	425	32	32	197	197	458	5192	178.2	99	60	40	199	2164.5		0	16	16	16	16	0	0	0	0	64	0	49.5	49.5	0	0	0	0	99		0	0	0	0	0	0	0	0	0	0		0	0
5	FSU	3306	694	2612	298	926	1455	628	3307	76947	933.3	622	311	104	1037	12783.6		0	149	149	463	463	0	0	0	0	1224	0	205.26	416.74	102.63	208.37	0	0	933		1282.45	1282.45	1282.45	641.225	641.225	641.225	641.225	641.225	641.225	7694.7		213.06	213.06
6	NAF	2	1	1	0	1	1	0	2	10	0	0	0	0	0	0.36		0	0	0	0.5	0.5	0	0	0	0	1	0	0	0	0	0	0	0	0		0.166667	0.166667	0.166667	0.0833333	0.0833333	0.0833333	0.0833333	0.0833333	0.0833333	1		0.006	0.006
7	EAF	0	0	0	0	0	0	0	0	22	0	0	0	0	0	0.36		0	0	0	0	0	0	0	0	0	0	0	0	0	0	0	0	0	0		0.366667	0.366667	0.366667	0.183333	0.183333	0.183333	0.183333	0.183333	0.183333	2.2		0.006	0.006
8	WCA	8	4	4	2	2	2	2	8	72	0	0	0	0	0	2.34		0	1	1	1	1	0	0	0	0	4	0	0	0	0	0	0	0	0		1.2	1.2	1.2	0.6	0.6	0.6	0.6	0.6	0.6	7.2		0.039	0.039
9	SAF	757	144	613	287	212	204	53	756	1178	0	0	0	0	0	0		0	143.5	143.5	106	106	0	0	0	0	499	0	0	0	0	0	0	0	0		19.6333	19.6333	19.6333	9.81667	9.81667	9.81667	9.81667	9.81667	9.81667	117.8		0	0
10	MEE	10	2	8	0	3	4	3	10	1125	0	0	0	0	0	0		0	0	0	1.5	1.5	0	0	0	0	3	0	0	0	0	0	0	0	0		18.75	18.75	18.75	9.375	9.375	9.375	9.375	9.375	9.375	112.5		0	0
11	CHN	4387	965	3422	1579	1623	965	219	4386	121693	95.4	32	32	43	107	2669.4		0	789.5	789.5	811.5	811.5	0	0	0	0	3202	0	10.56	21.44	10.56	21.44	0	0	64		2028.22	2028.22	2028.22	1014.11	1014.11	1014.11	1014.11	1014.11	1014.11	12169.3		44.49	44.49
12	OEA	119	45	74	38	19	34	27	118	1298	18	10	10	0	20	2776.5		0	19	19	9.5	9.5	0	0	0	0	57	0	3.3	6.7	3.3	6.7	0	0	20		21.6333	21.6333	21.6333	10.8167	10.8167	10.8167	10.8167	10.8167	10.8167	129.8		46.275	46.275
13	IND	1855	612	1243	612	1021	223	0	1856	3954	37.8	29	13	0	42	296.1		0	201.96	410.04	336.93	510.5	55.75	55.75	0	0	1570.93	0	9.57	19.43	4.29	8.71	0	0	42		65.9	65.9	65.9	32.95	32.95	32.95	32.95	32.95	32.95	395.4		4.935	4.935
14	OSA	11	7	4	9	2	0	0	11	83	25.2	14	14	0	28	1577.7		0	2.97	6.03	0.66	1	0	0	0	0	10.66	0	4.62	9.38	4.62	9.38	0	0	28		1.38333	1.38333	1.38333	0.691667	0.691667	0.691667	0.691667	0.691667	0.691667	8.3		26.295	26.295
15	JPN	9	1	8	0	2	4	3	9	297	0	0	0	0	0	9.9		0	0	0	1	1	0	0	0	0	2	0	0	0	0	0	0	0	0		0	0	0	0	0	0	0	0	0	0		0	0
16	OCN	983	236	747	609	373	0	0	982	2696	383.4	213	213	0	426	1548		0	304.5	304.5	186.5	186.5	0	0	0	0	982	0	106.5	106.5	0	0	0	0	213		0	0	0	0	0	0	0	0	0	0		0	0
17	PAS	56	48	8	48	2	3	3	56	941	42.3	24	24	0	48	495.9		0	24	24	1	1	0	0	0	0	50	0	7.92	16.08	0	0	0	0	24		15.6833	15.6833	15.6833	7.84167	7.84167	7.84167	7.84167	7.84167	7.84167	94.1		8.265	8.265
18	LAC	252	43	209	48	126	66	13	253	753	45.9	26	26	0	52	181.8		0	24	24	63	63	0	0	0	0	174	0	8.58	17.42	0	0	0	0	26		12.55	12.55	12.55	6.275	6.275	6.275	6.275	6.275	6.275	75.3		3.03	3.03
19	SOO
20	ARC																	Cheap, wealthy	2214.93	2426.07	1047.09	1221	55.75	55.75	0	0	7020.59		293.69	308.31	8.91	18.09	0	0	629	Cheap, wealthy	0	0	0	0	0	0	0	0	0	0	Cheap, wealthy	0	0
	SUB-TOTAL																	Expensive, poorer	1454.5	1454.5	1644.5	1644.5	0	0	0	0	6198		342.12	584.88	116.49	236.51	0	0	1280	Expensive, poorer	3467.93	3467.93	3467.93	1733.97	1733.97	1733.97	1733.97	1733.97	1733.97	20807.6	Expensive, poorer	346.401	346.401
	TOTAL	18244	5258	12986	7550	5731	3796	1170	18247	391053	2496.6	1529	1020	229	2778	40203.4		0	3669.43	3880.57	2691.59	2865.5	55.75	55.75	0	0	13218.6		635.81	893.19	125.4	254.6	0	0	1909		3467.93	3467.93	3467.93	1733.97	1733.97	1733.97	1733.97	1733.97	1733.97	20807.6		346.401	346.401
	Note:	Start by assuming that all of the reserves are available																	Note:	The quantity in each cost category is the result of taking the fraction of each type (surface, underground) of the total resource and multiplying that by the reserves values (Columns D and E)
[truncated: 8 more columns]

## Sheet: Coal - Production costs
	Coal production costs data									Assumptions
#	Coal type	Category	Regional distinction	Production costs ($/GJ)		# cost bins				#	Reservoir type	Category	Regional distinction	GEA extraction costs ($/GJ)		# cost bins	Cost multiplier	Cost mark-up ($/GJ)	C
				Min	Max									Min	Max
1	Hard coal	Reserves	all	0.9	9	4				1	Hard coal	Reserves	all	0.6	6	4	1.5	0	1
2		Resources	all	9	27	6				2		Resources	all	6	18	6	1.5	0	1
3	Lignite	Reserves	all	1.05	6	4				3	Lignite	Reserves	all	0.7	4	4	1.5		1
4		Resources	all	6	18	6				4		Resources	all	4	12	6	1.5		1
										C stands for comments (see below)
	Use GEA cost data									Comments
										#	Reference	Comment
										1		Differential recovery and costs. Wealthier countries: lower amounts at lower costs; less-wealthy countries: higher relative amounts but at higher costs
										2
										References are listed in tab 'References' - Grey cells indicate default GEA assumptions/data - EJ: Expert judgement

## Sheet: Supply cost curves
0.9	1.2	1.5	1.95	2	2.4	3	3.3	4	4.2	5.5	6.5	6.6	8	9	10	11	12	13.5	16	19	22	25	28	32	36
0	1454.5	1454.5	1644.5	2214.93	1644.5	2426.07	0	1047.09	0	1221	55.75	0	55.75	0	0	3467.93	0	3467.93	3467.93	1733.97	1733.97	1733.97	1733.97	1733.97	1733.97
0	1454.5	2909	4553.5	6768.43	8412.93	10839	10839	11886.1	11886.1	13107.1	13162.8	13162.8	13218.6	13218.6	13218.6	16686.5	16686.5	20154.5	23622.4	25356.4	27090.3	28824.3	30558.3	32292.2	34026.2
	1.05	1.45	1.8	2	2.25	2.7	3	4	4.2	5	6	6	7	8.5	10	12	14	16	18	21	24
0	0	293.69	308.31	342.12	8.91	18.09	584.88	116.49	0	236.51	0	0	346.401	346.401	346.401	173.201	173.201	173.201	173.201	173.201	173.201
0	0	293.69	602	944.12	953.03	971.12	1556	1672.49	1672.49	1909	1909	1909	2255.4	2601.8	2948.2	3121.4	3294.6	3467.8	3641	3814.21	3987.41
