# Supplementary material for: Data on fossil fuel availability for Shared Socioeconomic Pathways
Source: Data Brief. 2016 Nov 18;10:44–6. doi: 10.1016/j.dib.2016.11.043 (PMC5137328; doi:10.1016/j.dib.2016.11.043)
Supplement: Supplementary file 6 — Supplementary material [file mmc6.xlsx]

## Sheet: Coal data summary
	Reservoir type	Reserves/ Resources	Quantity		Cost
			Value (EJ)	Assumption	Value ($US/GJ)	Assumption
COAL	Hard coal	Reserves	18247	Sources: GEA	0.60-6.00	ETSAP; GEA		Note: these amounts start with the GEA reserves data
		Resources	39105.3	Sources: GEA	6.00-18.00	-		Losses in the mining process (GEA, p. 462) of 10% for surface mining and 50% for underground mining are not taken into account here
	Sub-total
	Lignite	Reserves	2778	Sources: GEA	0.70-4.00	ETSAP; GEA
		Resources	8543.21	Sources: GEA	4.00-12.00
	Sub-total
	Total
	LEGEND
	RR	Recovery rate

## Sheet: Coal resource
		GEA Reserves and Resources data																Recoverable reserves amounts																			Recoverable resources amounts
																		Hard coal										Lignite									Hard coal resource											Lignite resource
#	Region code	Hard coal									Lignite							0.6	0.8	1	1.3	1.6	2.2	2.8	4.4	6		0.7	0.95	1.2	1.5	1.8	2.8	3.8			5	7	9	10.25	11.5	12.75	14	16	18			3.5	4
																			0.5	0.5	0.5	0.5	0.5	0.5	0.5	0.5			0.5	0.5	0.5	0.5	0.5	0.5
		Reserves (EJ)	Surface (EJ)	Underground (EJ)	C I	C II	C III	C IV	Total	Resources (EJ)	Reserves (EJ)	B I	B II	B III	Total	Resources (EJ)		CI			CII		CIII		CIV			BI			BII		BIII				25% of resource; 20% recovery rate			25% of resource; 10% recovery rate			50% of resource; 5% recovery rate					25% of resource; 50% recovery
1	USA	5856	2342	3514	3924	1347	586	0	5857	163816	333.9	186	186	0	372	14743.8		0	1962	1962	673.5	673.5	293	293	0	0		0	93	93	93	93	0	0			2730.27	2730.27	2730.27	1365.13	1365.13	1365.13	1365.13	1365.13	1365.13	16381.6		614.325	614.325
2	CAN	109	82	27	64	29	18	0	111	3560	24.3	21	5	0	26	549		0	32	32	14.5	14.5	9	9	0	0		0	10.5	10.5	2.5	2.5	0	0			59.3333	59.3333	59.3333	29.6667	29.6667	29.6667	29.6667	29.6667	29.6667	356		22.875	22.875
3	WEU	67	0	67	0	11	34	22	67	7416	378.9	253	126	42	421	404.1		0	0	0	5.5	5.5	17	17	11	11		0	126.5	126.5	63	63	21	21			123.6	123.6	123.6	61.8	61.8	61.8	61.8	61.8	61.8	741.6		16.8375	16.8375
4	EEU	457	32	425	32	32	197	197	458	5192	178.2	99	60	40	199	2164.5		0	16	16	16	16	98.5	98.5	98.5	98.5		0	49.5	49.5	30	30	20	20			86.5333	86.5333	86.5333	43.2667	43.2667	43.2667	43.2667	43.2667	43.2667	519.2		90.1875	90.1875
5	FSU	3306	694	2612	298	926	1455	628	3307	76947	933.3	622	311	104	1037	12783.6		0	149	149	463	463	727.5	727.5	314	314		0	311	311	155.5	155.5	52	52			1282.45	1282.45	1282.45	641.225	641.225	641.225	641.225	641.225	641.225	7694.7		532.65	532.65
6	NAF	2	1	1	0	1	1	0	2	10	0	0	0	0	0	0.36		0	0	0	0.5	0.5	0.5	0.5	0	0		0	0	0	0	0	0	0			0.166667	0.166667	0.166667	0.0833333	0.0833333	0.0833333	0.0833333	0.0833333	0.0833333	1		0.015	0.015
7	EAF	0	0	0	0	0	0	0	0	22	0	0	0	0	0	0.36		0	0	0	0	0	0	0	0	0		0	0	0	0	0	0	0			0.366667	0.366667	0.366667	0.183333	0.183333	0.183333	0.183333	0.183333	0.183333	2.2		0.015	0.015
8	WCA	8	4	4	2	2	2	2	8	72	0	0	0	0	0	2.34		0	1	1	1	1	1	1	1	1		0	0	0	0	0	0	0			1.2	1.2	1.2	0.6	0.6	0.6	0.6	0.6	0.6	7.2		0.0975	0.0975
9	SAF	757	144	613	287	212	204	53	756	1178	0	0	0	0	0	0		0	143.5	143.5	106	106	102	102	26.5	26.5		0	0	0	0	0	0	0			19.6333	19.6333	19.6333	9.81667	9.81667	9.81667	9.81667	9.81667	9.81667	117.8		0	0
10	MEE	10	2	8	0	3	4	3	10	1125	0	0	0	0	0	0		0	0	0	1.5	1.5	2	2	1.5	1.5		0	0	0	0	0	0	0			18.75	18.75	18.75	9.375	9.375	9.375	9.375	9.375	9.375	112.5		0	0
11	CHN	4387	965	3422	1579	1623	965	219	4386	121693	95.4	32	32	43	107	2669.4		0	789.5	789.5	811.5	811.5	482.5	482.5	109.5	109.5		0	16	16	16	16	21.5	21.5			2028.22	2028.22	2028.22	1014.11	1014.11	1014.11	1014.11	1014.11	1014.11	12169.3		111.225	111.225
12	OEA	119	45	74	38	19	34	27	118	1298	18	10	10	0	20	2776.5		0	19	19	9.5	9.5	17	17	13.5	13.5		0	5	5	5	5	0	0			21.6333	21.6333	21.6333	10.8167	10.8167	10.8167	10.8167	10.8167	10.8167	129.8		115.688	115.688
13	IND	1855	612	1243	612	1021	223	0	1856	3954	37.8	29	13	0	42	296.1		0	306	306	510.5	510.5	111.5	111.5	0	0		0	14.5	14.5	6.5	6.5	0	0			65.9	65.9	65.9	32.95	32.95	32.95	32.95	32.95	32.95	395.4		12.3375	12.3375
14	OSA	11	7	4	9	2	0	0	11	83	25.2	14	14	0	28	1577.7		0	4.5	4.5	1	1	0	0	0	0		0	7	7	7	7	0	0			1.38333	1.38333	1.38333	0.691667	0.691667	0.691667	0.691667	0.691667	0.691667	8.3		65.7375	65.7375
15	JPN	9	1	8	0	2	4	3	9	297	0	0	0	0	0	9.9		0	0	0	1	1	2	2	1.5	1.5		0	0	0	0	0	0	0			4.95	4.95	4.95	2.475	2.475	2.475	2.475	2.475	2.475	29.7		0.4125	0.4125
16	OCN	983	236	747	609	373	0	0	982	2696	383.4	213	213	0	426	1548		0	304.5	304.5	186.5	186.5	0	0	0	0		0	106.5	106.5	106.5	106.5	0	0			44.9333	44.9333	44.9333	22.4667	22.4667	22.4667	22.4667	22.4667	22.4667	269.6		64.5	64.5
17	PAS	56	48	8	48	2	3	3	56	941	42.3	24	24	0	48	495.9		0	24	24	1	1	1.5	1.5	1.5	1.5		0	12	12	12	12	0	0			15.6833	15.6833	15.6833	7.84167	7.84167	7.84167	7.84167	7.84167	7.84167	94.1		20.6625	20.6625
18	LAC	252	43	209	48	126	66	13	253	753	45.9	26	26	0	52	181.8		0	24	24	63	63	33	33	6.5	6.5		0	13	13	13	13	0	0			12.55	12.55	12.55	6.275	6.275	6.275	6.275	6.275	6.275	75.3		7.575	7.575
19	SOO
20	ARC
	SUB-TOTAL
	TOTAL	18244	5258	12986	7550	5731	3796	1170	18247	391053	2496.6	1529	1020	229	2778	40203.4		0	3775	3775	2865.5	2865.5	1898	1898	585	585	18247	0	764.5	764.5	510	510	114.5	114.5	2778		6517.55	6517.55	6517.55	3258.78	3258.78	3258.78	3258.78	3258.78	3258.78	39105.3		1675.14	1675.14
	Note:	Start by assuming that all of the reserves are available																	Note:	The quantity in each cost category is the result of taking the fraction of each type (surface, underground) of the total resource and multiplying that by the reserves values (Columns D and E)
[truncated: 8 more columns]

## Sheet: Coal - Production costs
	Coal production costs data									Assumptions
#	Coal type	Category	Regional distinction	Production costs ($/GJ)		# cost bins				#	Reservoir type	Category	Regional distinction	GEA extraction costs ($/GJ)		# cost bins	Cost multiplier	Cost mark-up ($/GJ)	C
				Min	Max									Min	Max
1	Hard coal	Reserves	all	0.6	6	4				1	Hard coal	Reserves	all	0.6	6	4	1	0
2		Resources	all	6	18	6				2		Resources	all	6	18	6	1	0
3	Lignite	Reserves	all	0.7	4	4				3	Lignite	Reserves	all	0.7	4	4	0
4		Resources	all	4	12	6				4		Resources	all	4	12	6	0
										C stands for comments (see below)
	Use GEA cost data									Comments
										#	Reference	Comment
										1
										2
										References are listed in tab 'References' - Grey cells indicate default GEA assumptions/data - EJ: Expert judgement

## Sheet: Supply cost curves
0.6	0.8	1	1.3	1.6	2.2	2.8	4.4	5	6	7	9	10.25	11.5	12.75	14	16	18		0.7	0.95	1.2	1.5	1.8	2.8	3.5	3.8	4	4.5	5.5	6.5	7.5	9	10.5	12
0	3775	3775	2865.5	2865.5	1898	1898	585	6517.55	585	6517.55	6517.55	3258.78	3258.78	3258.78	3258.78	3258.78	3258.78		0	764.5	764.5	510	510	114.5	1675.14	114.5	1675.14	1675.14	837.57	837.57	837.57	335.028	335.028	335.028
0	3775	7550	10415.5	13281	15179	17077	17662	24179.5	24764.5	31282.1	37799.7	41058.4	44317.2	47576	50834.8	54093.5	57352.3		0	764.5	1529	2039	2549	2663.5	4338.64	4453.14	6128.28	7803.42	8640.99	9478.56	10316.1	10651.2	10986.2	11321.2
		0	5	7	9	10.25	11.5	12.75	14	16		18
			6517.55	6517.55	6517.55	3258.78	3258.78	3258.78	3258.78	3258.78		3258.78
		24764.5	31282.1	37799.7	44317.2	47576	50834.8	54093.5	57352.3	60611.1		63869.9
