# Supplementary material for: Data on fossil fuel availability for Shared Socioeconomic Pathways
Source: Data Brief. 2016 Nov 18;10:44–6. doi: 10.1016/j.dib.2016.11.043 (PMC5137328; doi:10.1016/j.dib.2016.11.043)
Supplement: Supplementary file 7 — Supplementary material [file mmc7.xlsx]

## Sheet: 0. Information
	Scenario name	SSP1
	Date of initial assessment	2012-11-01
	Revision number	3
	Last revision date	2014-08-11
	Authors	Jerome Hilaire and Nico Bauer
	Affiliation	Potsdam Institute for Climate Impact Research
	Contacts	hilaire@pik-potsdam.de or bauer@pik-potsdam.de
	Where to find the relevant information?
	This Excel workbook contains a collection of spreadsheet that describe oil and gas data. The colour code of the list below follows that of the spreadsheet tabs. Supply cost curves are displayed in spreadsheet 1. Data are further given on 3 levels with increasing degree of information. Oil and gas data summaries provide the basic information (spreadsheet 2 and 3). Oil and gas resources and costs d…
	0. Information (this spreadsheet)
	1. Oil and gas supply-cost curves
	2. Oil data summary (vs original GEA)
	3. Gas data summary (vs original GEA)
	4. Oil resources (quantities)
	5. Oil production costs
	6. Gas resources (quantities)
	7. Gas production costs
	8. References
	9. Definitions
	10. Revision information
	How to read these data?
	Red fonts indicate a change in the data.
	Green backgrounds are used for reserves
	Orange backgrounds are used for resources
	Blue backgrounds are used for conventional resources
	Violet backgrounds are used for unconventional resources

## Sheet: 1. Supply-cost curves
	Oil and gas supply cost curves
	Oil data												Gas data
	Updated GEA (SSP1)						GEA						Updated GEA (SSP1)						GEA
	v_curSpaTyp	v_curSpaItm	v_curffTyp	v_curCost	v_curQty		$/GJ	EJ					v_curSpaTyp	v_curSpaItm	v_curffTyp	v_curCost	v_curQty		$/GJ	EJ
	region	MEE	COO-rv	1.74	0		0.87	0					region	FSU	COG-rv	0.7	0		0.5	0
	region	MEE	COO-rv	1.74	1071.5		0.87	828.409					region	FSU	COG-rv	0.7	338.318		0.5	2257.05
	region	MEE	COO-rs	1.74	1071.5		1.0225	828.409					region	MEE	COG-rv	0.7	338.318		1.07	2257.05
	region	MEE	COO-rs	1.74	1076.42		1.0225	1656.82					region	MEE	COG-rv	0.7	930.768		1.07	5405.92
	region	MEE	COO-rv	2.045	1076.42		1.175	1656.82					region	MEE	COG-rs	0.7	930.768		1.5	5405.92
	region	MEE	COO-rv	2.045	2147.92		1.175	3313.64					region	MEE	COG-rs	0.7	978.991		1.5	8488.47
	region	MEE	COO-rs	2.045	2147.92		1.48	3313.64					region	FSU	COG-rv	1.005	978.991		2	8488.47
	region	MEE	COO-rs	2.045	2152.85		1.48	6629.93					region	FSU	COG-rv	1.005	1317.31		2	10080.6
	region	MEE	COO-rv	2.35	2152.85		2.1925	6629.93					region	MEE	COG-rv	1.005	1317.31		2.75	10080.6
	region	MEE	COO-rv	2.35	3224.35		2.1925	8341.96					region	MEE	COG-rv	1.005	1909.76		2.75	10451.4
	region	MEE	COO-rs	2.35	3224.35		2.965	8341.96					region	MEE	COG-rs	1.005	1909.76		3	10451.4
	region	MEE	COO-rs	2.35	3229.27		2.965	9473.07					region	MEE	COG-rs	1.005	1957.98		3	14482.6
	region	MEE	COO-rv	2.655	3229.27		2.965	9473.07					region	FSU	COG-rv	1.31	1957.98		3.7	14482.6
	region	MEE	COO-rv	2.655	4300.77		2.965	10329.1					region	FSU	COG-rv	1.31	2296.3		3.7	19521.6
	region	MEE	COO-rs	2.655	4300.77		3.50877	10329.1					region	MEE	COG-rv	1.31	2296.3		4.54	19521.6
	region	MEE	COO-rs	2.655	4305.7		3.50877	11490.4					region	MEE	COG-rv	1.31	2888.75		4.54	25568.5
	region	FSU	COO-rv	2.96	4305.7		4.38596	11490.4					region	MEE	COG-rs	1.31	2888.75		5.548	25568.5
	region	FSU	COO-rv	2.96	4470.99		4.38596	11880.9					region	MEE	COG-rs	1.31	2936.97		5.548	30607.5
	region	MEE	COO-rs	2.96	4470.99		4.38596	11880.9					region	USA	COG-rv	1.4	2936.97		6.7576	30607.5
	region	MEE	COO-rs	2.96	4626.22		4.38596	12271.5					region	USA	COG-rv	1.4	2982.23		6.7576	32419.8
	region	FSU	COO-rv	3.435	4626.22		5.26316	12271.5					region	CAN	COG-rv	1.4	2982.23		8.14864	32419.8
	region	FSU	COO-rv	3.435	4791.51		5.26316	13414.8					region	CAN	COG-rv	1.4	2991.41		8.14864	34232.2
	region	MEE	COO-rs	3.435	4791.51		7.01754	13414.8					region	WEU	COG-rv	1.4	2991.41		9.67878	34232.2
	region	MEE	COO-rs	3.435	4946.74		7.01754	14186.5					region	WEU	COG-rv	1.4	3025.84		9.67878	35843.2
	region	USA	COO-rv	3.48	4946.74		7.01754	14186.5					region	EEU	COG-rv	1.4	3025.84		11.3619	35843.2
	region	USA	COO-rv	3.48	4954.03		7.01754	15373.7					region	EEU	COG-rv	1.4	3030.1		11.3619	37454.2
	region	NAF	COO-rv	3.48	4954.03		8.77193	15373.7					region	NAF	COG-rv	1.4	3030.1		13.2134	37454.2
	region	NAF	COO-rv	3.48	4961.92		8.77193	17438.7					region	NAF	COG-rv	1.4	3047.71		13.2134	43662.4
	region	EAF	COO-rv	3.48	4961.92		8.77193	17438.7					region	EAF	COG-rv	1.4	3047.71
	region	EAF	COO-rv	3.48	4962		8.77193	18856.3					region	EAF	COG-rv	1.4	3047.77
	region	WCA	COO-rv	3.48	4962		10.0877	18856.3					region	WCA	COG-rv	1.4	3047.77
	region	WCA	COO-rv	3.48	5008.24		10.0877	20281.4					region	WCA	COG-rv	1.4	3093.03
	region	SAF	COO-rv	3.48	5008.24		12.0614	20281.4					region	SAF	COG-rv	1.4	3093.03
	region	SAF	COO-rv	3.48	5013.1		12.0614	22874.5					region	SAF	COG-rv	1.4	3097.49
	region	IND	COO-rv	3.48	5013.1		14.693	22874.5					region	CHN	COG-rv	1.4	3097.49
	region	IND	COO-rv	3.48	5013.69		14.693	25971.9					region	CHN	COG-rv	1.4	3116.83
	region	OSA	COO-rv	3.48	5013.69		17.9825	25971.9					region	OEA	COG-rv	1.4	3116.83
	region	OSA	COO-rv	3.48	5013.73		17.9825	28098.4					region	OEA	COG-rv	1.4	3122.36
	region	OCN	COO-rv	3.48	5013.73		21.9298	28098.4					region	IND	COG-rv	1.4	3122.36
	region	OCN	COO-rv	3.48	5014.37		21.9298	30236					region	IND	COG-rv	1.4	3125.38
	region	PAS	COO-rv	3.48	5014.37		26.2061	30236					region	OSA	COG-rv	1.4	3125.38
	region	PAS	COO-rv	3.48	5019.08		26.2061	34125.6					region	OSA	COG-rv	1.4	3133.7
	region	LAC	COO-rv	3.48	5019.08								region	JPN	COG-rv	1.4	3133.7
	region	LAC	COO-rv	3.48	5055.04								region	JPN	COG-rv	1.4	3133.87
	region	FSU	COO-rv	3.91	5055.04								region	OCN	COG-rv	1.4	3133.87
	region	FSU	COO-rv	3.91	5220.32								region	OCN	COG-rv	1.4	3158.31
	region	MEE	COO-rs	3.91	5220.32								region	PAS	COG-rv	1.4	3158.31
	region	MEE	COO-rs	3.91	5375.56								region	PAS	COG-rv	1.4	3197.41
	region	USA	COO-rv	4.09	5375.56								region	LAC	COG-rv	1.4	3197.41
	region	USA	COO-rv	4.09	5382.85								region	LAC	COG-rv	1.4	3250.78
	region	NAF	COO-rv	4.09	5382.85								region	WCA	COG-rs	1.4	3250.78
	region	NAF	COO-rv	4.09	5390.74								region	WCA	COG-rs	1.4	3258.8
	region	EAF	COO-rv	4.09	5390.74								region	SAF	COG-rs	1.4	3258.8
	region	EAF	COO-rv	4.09	5390.82								region	SAF	COG-rs	1.4	3262.99
	region	WCA	COO-rv	4.09	5390.82								region	CHN	COG-rs	1.4	3262.99
	region	WCA	COO-rv	4.09	5437.06								region	CHN	COG-rs	1.4	3273.5
	region	SAF	COO-rv	4.09	5437.06								region	OEA	COG-rs	1.4	3273.5
	region	SAF	COO-rv	4.09	5441.91								region	OEA	COG-rs	1.4	3275.2
	region	IND	COO-rv	4.09	5441.91								region	OCN	COG-rs	1.4	3275.2
	region	IND	COO-rv	4.09	5442.51								region	OCN	COG-rs	1.4	3277.3
	region	OSA	COO-rv	4.09	5442.51								region	FSU	COG-rv	1.615	3277.3
	region	OSA	COO-rv	4.09	5442.55								region	FSU	COG-rv	1.615	3615.62
	region	OCN	COO-rv	4.09	5442.55								region	MEE	COG-rv	1.615	3615.62
	region	OCN	COO-rv	4.09	5443.19								region	MEE	COG-rv	1.615	4208.07
	region	PAS	COO-rv	4.09	5443.19								region	MEE	COG-rs	1.615	4208.07
	region	PAS	COO-rv	4.09	5447.9								region	MEE	COG-rs	1.615	4256.29
	region	LAC	COO-rv	4.09	5447.9								region	FSU	COG-rv	1.92	4256.29
	region	LAC	COO-rv	4.09	5483.85								region	FSU	COG-rv	1.92	4417.78
	region	FSU	COO-rv	4.385	5483.85								region	FSU	COG-rs	1.92	4417.78
	region	FSU	COO-rv	4.385	5649.14								region	FSU	COG-rs	1.92	4783.44
	region	MEE	COO-rs	4.385	5649.14								region	MEE	COG-rs	1.92	4783.44
	region	MEE	COO-rs	4.385	5804.37								region	MEE	COG-rs	1.92	4912.62
	region	USA	COO-rv	4.7	5804.37								region	USA	COG-rv	2.01	4912.62
	region	USA	COO-rv	4.7	5811.67								region	USA	COG-rv	2.01	4957.87
	region	NAF	COO-rv	4.7	5811.67								region	CAN	COG-rv	2.01	4957.87
	region	NAF	COO-rv	4.7	5819.56								region	CAN	COG-rv	2.01	4967.06
	region	EAF	COO-rv	4.7	5819.56								region	WEU	COG-rv	2.01	4967.06
	region	EAF	COO-rv	4.7	5819.64								region	WEU	COG-rv	2.01	5001.48
	region	WCA	COO-rv	4.7	5819.64								region	EEU	COG-rv	2.01	5001.48
	region	WCA	COO-rv	4.7	5865.88								region	EEU	COG-rv	2.01	5005.74
	region	SAF	COO-rv	4.7	5865.88								region	NAF	COG-rv	2.01	5005.74
	region	SAF	COO-rv	4.7	5870.73								region	NAF	COG-rv	2.01	5023.35
	region	IND	COO-rv	4.7	5870.73								region	EAF	COG-rv	2.01	5023.35
	region	IND	COO-rv	4.7	5871.33								region	EAF	COG-rv	2.01	5023.41
	region	OSA	COO-rv	4.7	5871.33								region	WCA	COG-rv	2.01	5023.41
	region	OSA	COO-rv	4.7	5871.36								region	WCA	COG-rv	2.01	5068.67
	region	OCN	COO-rv	4.7	5871.36								region	SAF	COG-rv	2.01	5068.67
	region	OCN	COO-rv	4.7	5872.01								region	SAF	COG-rv	2.01	5073.14
	region	PAS	COO-rv	4.7	5872.01								region	CHN	COG-rv	2.01	5073.14
	region	PAS	COO-rv	4.7	5876.72								region	CHN	COG-rv	2.01	5092.47
	region	LAC	COO-rv	4.7	5876.72								region	OEA	COG-rv	2.01	5092.47
	region	LAC	COO-rv	4.7	5912.67								region	OEA	COG-rv	2.01	5098
	region	FSU	COO-rv	4.86	5912.67								region	IND	COG-rv	2.01	5098
	region	FSU	COO-rv	4.86	5931.13								region	IND	COG-rv	2.01	5101.02
	region	FSU	COO-rs	4.86	5931.13								region	OSA	COG-rv	2.01	5101.02
	region	FSU	COO-rs	4.86	6107.49								region	OSA	COG-rv	2.01	5109.34
	region	MEE	COO-rs	4.86	6107.49								region	JPN	COG-rv	2.01	5109.34
	region	MEE	COO-rs	4.86	6169.59								region	JPN	COG-rv	2.01	5109.51
	region	USA	COO-rv	5.31	6169.59								region	OCN	COG-rv	2.01	5109.51
	region	USA	COO-rv	5.31	6176.88								region	OCN	COG-rv	2.01	5133.95
	region	NAF	COO-rv	5.31	6176.88								region	PAS	COG-rv	2.01	5133.95
	region	NAF	COO-rv	5.31	6184.77								region	PAS	COG-rv	2.01	5173.05
	region	EAF	COO-rv	5.31	6184.77								region	LAC	COG-rv	2.01	5173.05
	region	EAF	COO-rv	5.31	6184.85								region	LAC	COG-rv	2.01	5226.42
	region	WCA	COO-rv	5.31	6184.85								region	WCA	COG-rs	2.01	5226.42
	region	WCA	COO-rv	5.31	6231.09								region	WCA	COG-rs	2.01	5234.44
	region	SAF	COO-rv	5.31	6231.09								region	SAF	COG-rs	2.01	5234.44
	region	SAF	COO-rv	5.31	6235.94								region	SAF	COG-rs	2.01	5238.64
	region	IND	COO-rv	5.31	6235.94								region	CHN	COG-rs	2.01	5238.64
	region	IND	COO-rv	5.31	6236.54								region	CHN	COG-rs	2.01	5249.14
	region	OSA	COO-rv	5.31	6236.54								region	OEA	COG-rs	2.01	5249.14
	region	OSA	COO-rv	5.31	6236.58								region	OEA	COG-rs	2.01	5250.84
	region	OCN	COO-rv	5.31	6236.58								region	OCN	COG-rs	2.01	5250.84
	region	OCN	COO-rv	5.31	6237.22								region	OCN	COG-rs	2.01	5252.94
	region	PAS	COO-rv	5.31	6237.22								region	FSU	COG-rv	2.135	5252.94
	region	PAS	COO-rv	5.31	6241.93								region	FSU	COG-rv	2.135	5414.43
	region	LAC	COO-rv	5.31	6241.93								region	FSU	COG-rs	2.135	5414.43
	region	LAC	COO-rv	5.31	6277.88								region	FSU	COG-rs	2.135	5780.09
	region	FSU	COO-rv	5.395	6277.88								region	MEE	COG-rs	2.135	5780.09
	region	FSU	COO-rv	5.395	6296.34								region	MEE	COG-rs	2.135	5909.27
	region	FSU	COO-rs	5.395	6296.34								region	FSU	COG-rv	2.35	5909.27
	region	FSU	COO-rs	5.395	6472.71								region	FSU	COG-rv	2.35	6070.75
	region	MEE	COO-rs	5.395	6472.71								region	FSU	COG-rs	2.35	6070.75
	region	MEE	COO-rs	5.395	6534.8								region	FSU	COG-rs	2.35	6436.41
	region	USA	COO-rv	5.92	6534.8								region	MEE	COG-rs	2.35	6436.41
	region	USA	COO-rv	5.92	6568.01								region	MEE	COG-rs	2.35	6565.59
	region	CAN	COO-rv	5.92	6568.01								region	FSU	COG-rv	2.565	6565.59
	region	CAN	COO-rv	5.92	6569.67								region	FSU	COG-rv	2.565	6727.07
	region	EEU	COO-rv	5.92	6569.67								region	FSU	COG-rs	2.565	6727.07
	region	EEU	COO-rv	5.92	6569.88								region	FSU	COG-rs	2.565	7092.73
	region	NAF	COO-rv	5.92	6569.88								region	MEE	COG-rs	2.565	7092.73
	region	NAF	COO-rv	5.92	6655.77								region	MEE	COG-rs	2.565	7221.91
	region	EAF	COO-rv	5.92	6655.77								region	USA	COG-rv	2.62	7221.91
	region	EAF	COO-rv	5.92	6656.66								region	USA	COG-rv	2.62	7267.17
	region	WCA	COO-rv	5.92	6656.66								region	CAN	COG-rv	2.62	7267.17
	region	WCA	COO-rv	5.92	6673.92								region	CAN	COG-rv	2.62	7276.35
	region	SAF	COO-rv	5.92	6673.92								region	WEU	COG-rv	2.62	7276.35
	region	SAF	COO-rv	5.92	6688.32								region	WEU	COG-rv	2.62	7310.78
	region	CHN	COO-rv	5.92	6688.32								region	EEU	COG-rv	2.62	7310.78
	region	CHN	COO-rv	5.92	6690.07								region	EEU	COG-rv	2.62	7315.04
	region	OEA	COO-rv	5.92	6690.07								region	NAF	COG-rv	2.62	7315.04
	region	OEA	COO-rv	5.92	6690.61								region	NAF	COG-rv	2.62	7332.65
	region	IND	COO-rv	5.92	6690.61								region	EAF	COG-rv	2.62	7332.65
	region	IND	COO-rv	5.92	6694.8								region	EAF	COG-rv	2.62	7332.71
	region	OSA	COO-rv	5.92	6694.8								region	WCA	COG-rv	2.62	7332.71
	region	OSA	COO-rv	5.92	6695.05								region	WCA	COG-rv	2.62	7377.97
	region	OCN	COO-rv	5.92	6695.05								region	SAF	COG-rv	2.62	7377.97
	region	OCN	COO-rv	5.92	6699.18								region	SAF	COG-rv	2.62	7382.43
	region	PAS	COO-rv	5.92	6699.18								region	CHN	COG-rv	2.62	7382.43
	region	PAS	COO-rv	5.92	6710.72								region	CHN	COG-rv	2.62	7401.77
	region	LAC	COO-rv	5.92	6710.72								region	OEA	COG-rv	2.62	7401.77
	region	LAC	COO-rv	5.92	6794.52								region	OEA	COG-rv	2.62	7407.29
	region	USA	COO-rs	5.92	6794.52								region	IND	COG-rv	2.62	7407.29
	region	USA	COO-rs	5.92	6805.03								region	IND	COG-rv	2.62	7410.32
	region	WCA	COO-rs	5.92	6805.03								region	OSA	COG-rv	2.62	7410.32
	region	WCA	COO-rs	5.92	6864.91								region	OSA	COG-rv	2.62	7418.64
	region	SAF	COO-rs	5.92	6864.91								region	JPN	COG-rv	2.62	7418.64
	region	SAF	COO-rs	5.92	6876.69								region	JPN	COG-rv	2.62	7418.81
	region	PAS	COO-rs	5.92	6876.69								region	OCN	COG-rv	2.62	7418.81
	region	PAS	COO-rs	5.92	6880.13								region	OCN	COG-rv	2.62	7443.25
	region	LAC	COO-rs	5.92	6880.13								region	PAS	COG-rv	2.62	7443.25
	region	LAC	COO-rs	5.92	6895.54								region	PAS	COG-rv	2.62	7482.35
	region	FSU	COO-rv	5.93	6895.54								region	LAC	COG-rv	2.62	7482.35
	region	FSU	COO-rv	5.93	6914								region	LAC	COG-rv	2.62	7535.72
	region	FSU	COO-rs	5.93	6914								region	WCA	COG-rs	2.62	7535.72
	region	FSU	COO-rs	5.93	7090.36								region	WCA	COG-rs	2.62	7543.74
	region	MEE	COO-rs	5.93	7090.36								region	SAF	COG-rs	2.62	7543.74
	region	MEE	COO-rs	5.93	7152.45								region	SAF	COG-rs	2.62	7547.93
	region	FSU	COO-rv	6.465	7152.45								region	CHN	COG-rs	2.62	7547.93
	region	FSU	COO-rv	6.465	7170.92								region	CHN	COG-rs	2.62	7558.43
	region	FSU	COO-rs	6.465	7170.92								region	OEA	COG-rs	2.62	7558.43
	region	FSU	COO-rs	6.465	7347.28								region	OEA	COG-rs	2.62	7560.14
	region	MEE	COO-rs	6.465	7347.28								region	OCN	COG-rs	2.62	7560.14
	region	MEE	COO-rs	6.465	7409.37								region	OCN	COG-rs	2.62	7562.24
	region	USA	COO-rv	6.87	7409.37								region	FSU	COG-rs	2.78	7562.24
	region	USA	COO-rv	6.87	7442.58								region	FSU	COG-rs	2.78	7797.7
	region	CAN	COO-rv	6.87	7442.58								region	MEE	COG-rs	2.78	7797.7
	region	CAN	COO-rv	6.87	7444.24								region	MEE	COG-rs	2.78	7849.38
	region	EEU	COO-rv	6.87	7444.24								region	USA	COG-rv	3.23	7849.38
	region	EEU	COO-rv	6.87	7444.45								region	USA	COG-rv	3.23	7894.63
	region	NAF	COO-rv	6.87	7444.45								region	CAN	COG-rv	3.23	7894.63
	region	NAF	COO-rv	6.87	7530.34								region	CAN	COG-rv	3.23	7903.81
	region	EAF	COO-rv	6.87	7530.34								region	WEU	COG-rv	3.23	7903.81
	region	EAF	COO-rv	6.87	7531.23								region	WEU	COG-rv	3.23	7938.24
	region	WCA	COO-rv	6.87	7531.23								region	EEU	COG-rv	3.23	7938.24
	region	WCA	COO-rv	6.87	7548.49								region	EEU	COG-rv	3.23	7942.5
	region	SAF	COO-rv	6.87	7548.49								region	NAF	COG-rv	3.23	7942.5
	region	SAF	COO-rv	6.87	7562.89								region	NAF	COG-rv	3.23	7960.11
	region	CHN	COO-rv	6.87	7562.89								region	EAF	COG-rv	3.23	7960.11
	region	CHN	COO-rv	6.87	7564.64								region	EAF	COG-rv	3.23	7960.17
	region	OEA	COO-rv	6.87	7564.64								region	WCA	COG-rv	3.23	7960.17
	region	OEA	COO-rv	6.87	7565.18								region	WCA	COG-rv	3.23	8005.43
	region	IND	COO-rv	6.87	7565.18								region	SAF	COG-rv	3.23	8005.43
	region	IND	COO-rv	6.87	7569.37								region	SAF	COG-rv	3.23	8009.89
	region	OSA	COO-rv	6.87	7569.37								region	CHN	COG-rv	3.23	8009.89
	region	OSA	COO-rv	6.87	7569.62								region	CHN	COG-rv	3.23	8029.23
	region	OCN	COO-rv	6.87	7569.62								region	OEA	COG-rv	3.23	8029.23
	region	OCN	COO-rv	6.87	7573.75								region	OEA	COG-rv	3.23	8034.76
	region	PAS	COO-rv	6.87	7573.75								region	IND	COG-rv	3.23	8034.76
	region	PAS	COO-rv	6.87	7585.29								region	IND	COG-rv	3.23	8037.78
	region	LAC	COO-rv	6.87	7585.29								region	OSA	COG-rv	3.23	8037.78
	region	LAC	COO-rv	6.87	7669.09								region	OSA	COG-rv	3.23	8046.1
	region	USA	COO-rs	6.87	7669.09								region	JPN	COG-rv	3.23	8046.1
	region	USA	COO-rs	6.87	7679.6								region	JPN	COG-rv	3.23	8046.27
	region	WCA	COO-rs	6.87	7679.6								region	OCN	COG-rv	3.23	8046.27
	region	WCA	COO-rs	6.87	7739.48								region	OCN	COG-rv	3.23	8070.71
	region	SAF	COO-rs	6.87	7739.48								region	PAS	COG-rv	3.23	8070.71
	region	SAF	COO-rs	6.87	7751.26								region	PAS	COG-rv	3.23	8109.81
	region	PAS	COO-rs	6.87	7751.26								region	LAC	COG-rv	3.23	8109.81
	region	PAS	COO-rs	6.87	7754.7								region	LAC	COG-rv	3.23	8163.18
	region	LAC	COO-rs	6.87	7754.7								region	WCA	COG-rs	3.23	8163.18
	region	LAC	COO-rs	6.87	7770.11								region	WCA	COG-rs	3.23	8171.2
	region	FSU	COO-rs	7	7770.11								region	SAF	COG-rs	3.23	8171.2
	region	FSU	COO-rs	7	7845.75								region	SAF	COG-rs	3.23	8175.4
	region	USA	COO-rv	7.82	7845.75								region	CHN	COG-rs	3.23	8175.4
	region	USA	COO-rv	7.82	7878.96								region	CHN	COG-rs	3.23	8185.9
	region	CAN	COO-rv	7.82	7878.96								region	OEA	COG-rs	3.23	8185.9
	region	CAN	COO-rv	7.82	7880.62								region	OEA	COG-rs	3.23	8187.6
	region	EEU	COO-rv	7.82	7880.62								region	OCN	COG-rs	3.23	8187.6
	region	EEU	COO-rv	7.82	7880.83								region	OCN	COG-rs	3.23	8189.7
	region	NAF	COO-rv	7.82	7880.83								region	FSU	COG-rs	3.335	8189.7
	region	NAF	COO-rv	7.82	7966.72								region	FSU	COG-rs	3.335	8425.17
	region	EAF	COO-rv	7.82	7966.72								region	MEE	COG-rs	3.335	8425.17
	region	EAF	COO-rv	7.82	7967.61								region	MEE	COG-rs	3.335	8476.84
	region	WCA	COO-rv	7.82	7967.61								region	USA	COG-rv	3.84	8476.84
	region	WCA	COO-rv	7.82	7984.87								region	USA	COG-rv	3.84	8487.26
	region	SAF	COO-rv	7.82	7984.87								region	CAN	COG-rv	3.84	8487.26
	region	SAF	COO-rv	7.82	7999.27								region	CAN	COG-rv	3.84	8491.89
	region	CHN	COO-rv	7.82	7999.27								region	WEU	COG-rv	3.84	8491.89
	region	CHN	COO-rv	7.82	8001.02								region	WEU	COG-rv	3.84	8491.89
	region	OEA	COO-rv	7.82	8001.02								region	EEU	COG-rv	3.84	8491.89
	region	OEA	COO-rv	7.82	8001.56								region	EEU	COG-rv	3.84	8494.22
	region	IND	COO-rv	7.82	8001.56								region	NAF	COG-rv	3.84	8494.22
	region	IND	COO-rv	7.82	8005.75								region	NAF	COG-rv	3.84	8535.31
	region	OSA	COO-rv	7.82	8005.75								region	EAF	COG-rv	3.84	8535.31
	region	OSA	COO-rv	7.82	8006								region	EAF	COG-rv	3.84	8535.44
	region	OCN	COO-rv	7.82	8006								region	IND	COG-rv	3.84	8535.44
	region	OCN	COO-rv	7.82	8010.13								region	IND	COG-rv	3.84	8541.13
	region	PAS	COO-rv	7.82	8010.13								region	OSA	COG-rv	3.84	8541.13
	region	PAS	COO-rv	7.82	8021.67								region	OSA	COG-rv	3.84	8543.22
	region	LAC	COO-rv	7.82	8021.67								region	JPN	COG-rv	3.84	8543.22
	region	LAC	COO-rv	7.82	8105.47								region	JPN	COG-rv	3.84	8543.27
	region	USA	COO-rs	7.82	8105.47								region	PAS	COG-rv	3.84	8543.27
	region	USA	COO-rs	7.82	8115.98								region	PAS	COG-rv	3.84	8562.39
	region	WCA	COO-rs	7.82	8115.98								region	LAC	COG-rv	3.84	8562.39
	region	WCA	COO-rs	7.82	8175.86								region	LAC	COG-rv	3.84	8572.56
	region	SAF	COO-rs	7.82	8175.86								region	USA	COG-rs	3.84	8572.56
	region	SAF	COO-rs	7.82	8187.64								region	USA	COG-rs	3.84	8641.94
	region	PAS	COO-rs	7.82	8187.64								region	CAN	COG-rs	3.84	8641.94
	region	PAS	COO-rs	7.82	8191.08								region	CAN	COG-rs	3.84	8645.22
	region	LAC	COO-rs	7.82	8191.08								region	WEU	COG-rs	3.84	8645.22
	region	LAC	COO-rs	7.82	8206.49								region	WEU	COG-rs	3.84	8672.6
	region	FSU	COO-rs	7.855	8206.49								region	EEU	COG-rs	3.84	8672.6
	region	FSU	COO-rs	7.855	8282.13								region	EEU	COG-rs	3.84	8673.07
	region	USA	EHO-rv	7.89474	8282.13								region	WCA	COG-rs	3.84	8673.07
	region	USA	EHO-rv	7.89474	8285.2								region	WCA	COG-rs	3.84	8692.27
	region	CAN	EHO-rv	7.89474	8285.2								region	SAF	COG-rs	3.84	8692.27
	region	CAN	EHO-rv	7.89474	8285.21								region	SAF	COG-rs	3.84	8697.23
	region	WEU	EHO-rv	7.89474	8285.21								region	CHN	COG-rs	3.84	8697.23
	region	WEU	EHO-rv	7.89474	8285.23								region	CHN	COG-rs	3.84	8724.36
	region	EEU	EHO-rv	7.89474	8285.23								region	OEA	COG-rs	3.84	8724.36
	region	EEU	EHO-rv	7.89474	8285.23								region	OEA	COG-rs	3.84	8728.76
	region	FSU	EHO-rv	7.89474	8285.23								region	IND	COG-rs	3.84	8728.76
	region	FSU	EHO-rv	7.89474	8285.28								region	IND	COG-rs	3.84	8730.46
	region	NAF	EHO-rv	7.89474	8285.28								region	OSA	COG-rs	3.84	8730.46
	region	NAF	EHO-rv	7.89474	8285.31								region	OSA	COG-rs	3.84	8737.42
	region	MEE	EHO-rv	7.89474	8285.31								region	OCN	COG-rs	3.84	8737.42
	region	MEE	EHO-rv	7.89474	8285.32								region	OCN	COG-rs	3.84	8746.08
	region	CHN	EHO-rv	7.89474	8285.32								region	PAS	COG-rs	3.84	8746.08
	region	CHN	EHO-rv	7.89474	8285.66								region	PAS	COG-rs	3.84	8770.43
	region	LAC	EHO-rv	7.89474	8285.66								region	LAC	COG-rs	3.84	8770.43
	region	LAC	EHO-rv	7.89474	8301.19								region	LAC	COG-rs	3.84	8799.17
	region	CAN	TAO-rv	7.89474	8301.19								region	FSU	COG-rs	3.89	8799.17
	region	CAN	TAO-rv	7.89474	8354.29								region	FSU	COG-rs	3.89	9034.63
	region	WEU	TAO-rv	7.89474	8354.29								region	MEE	COG-rs	3.89	9034.63
	region	WEU	TAO-rv	7.89474	8354.32								region	MEE	COG-rs	3.89	9086.3
	region	FSU	TAO-rv	7.89474	8354.32								region	USA	TIG-rv	4.05	9086.3
	region	FSU	TAO-rv	7.89474	8397.52								region	USA	TIG-rv	4.05	9242.82
	region	WCA	TAO-rv	7.89474	8397.52								region	CAN	TIG-rv	4.05	9242.82
	region	WCA	TAO-rv	7.89474	8397.81								region	CAN	TIG-rv	4.05	9321.08
	region	SAF	TAO-rv	7.89474	8397.81								region	WEU	TIG-rv	4.05	9321.08
	region	SAF	TAO-rv	7.89474	8398.02								region	WEU	TIG-rv	4.05	9341.94
	region	PAS	TAO-rv	7.89474	8398.02								region	EEU	TIG-rv	4.05	9341.94
	region	PAS	TAO-rv	7.89474	8398.12								region	EEU	TIG-rv	4.05	9362.8
	region	USA	SHO-rv	7.89474	8398.12								region	FSU	TIG-rv	4.05	9362.8
	region	USA	SHO-rv	7.89474	8461.37								region	FSU	TIG-rv	4.05	9508.82
	region	WEU	SHO-rv	7.89474	8461.37								region	NAF	TIG-rv	4.05	9508.82
	region	WEU	SHO-rv	7.89474	8461.51								region	NAF	TIG-rv	4.05	9550.54
	region	EEU	SHO-rv	7.89474	8461.51								region	EAF	TIG-rv	4.05	9550.54
	region	EEU	SHO-rv	7.89474	8461.51								region	EAF	TIG-rv	4.05	9571.4
	region	FSU	SHO-rv	7.89474	8461.51								region	WCA	TIG-rv	4.05	9571.4
	region	FSU	SHO-rv	7.89474	8462.1								region	WCA	TIG-rv	4.05	9633.98
	region	NAF	SHO-rv	7.89474	8462.1								region	SAF	TIG-rv	4.05	9633.98
	region	NAF	SHO-rv	7.89474	8462.53								region	SAF	TIG-rv	4.05	9649.66
	region	MEE	SHO-rv	7.89474	8462.53								region	MEE	TIG-rv	4.05	9649.66
	region	MEE	SHO-rv	7.89474	8472.11								region	MEE	TIG-rv	4.05	9727.92
	region	CHN	SHO-rv	7.89474	8472.11								region	CHN	TIG-rv	4.05	9727.92
	region	CHN	SHO-rv	7.89474	8472.66								region	CHN	TIG-rv	4.05	9743.6
	region	OCN	SHO-rv	7.89474	8472.66								region	OEA	TIG-rv	4.05	9743.6
	region	OCN	SHO-rv	7.89474	8473.41								region	OEA	TIG-rv	4.05	9759.28
	region	PAS	SHO-rv	7.89474	8473.41								region	IND	TIG-rv	4.05	9759.28
	region	PAS	SHO-rv	7.89474	8473.77								region	IND	TIG-rv	4.05	9774.96
	region	LAC	SHO-rv	7.89474	8473.77								region	OSA	TIG-rv	4.05	9774.96
	region	LAC	SHO-rv	7.89474	8474.09								region	OSA	TIG-rv	4.05	9806.32
	region	FSU	COO-rs	8.71	8474.09								region	OCN	TIG-rv	4.05	9806.32
	region	FSU	COO-rs	8.71	8549.73								region	OCN	TIG-rv	4.05	9827.18
	region	USA	COO-rv	8.77	8549.73								region	PAS	TIG-rv	4.05	9827.18
	region	USA	COO-rv	8.77	8582.94								region	PAS	TIG-rv	4.05	9858.54
	region	CAN	COO-rv	8.77	8582.94								region	LAC	TIG-rv	4.05	9858.54
	region	CAN	COO-rv	8.77	8584.6								region	LAC	TIG-rv	4.05	9889.9
	region	EEU	COO-rv	8.77	8584.6								region	USA	COG-rv	4.27	9889.9
	region	EEU	COO-rv	8.77	8584.81								region	USA	COG-rv	4.27	9900.33
	region	NAF	COO-rv	8.77	8584.81								region	CAN	COG-rv	4.27	9900.33
	region	NAF	COO-rv	8.77	8670.7								region	CAN	COG-rv	4.27	9904.95
	region	EAF	COO-rv	8.77	8670.7								region	WEU	COG-rv	4.27	9904.95
	region	EAF	COO-rv	8.77	8671.59								region	WEU	COG-rv	4.27	9904.95
	region	WCA	COO-rv	8.77	8671.59								region	EEU	COG-rv	4.27	9904.95
	region	WCA	COO-rv	8.77	8688.85								region	EEU	COG-rv	4.27	9907.28
	region	SAF	COO-rv	8.77	8688.85								region	NAF	COG-rv	4.27	9907.28
	region	SAF	COO-rv	8.77	8703.25								region	NAF	COG-rv	4.27	9948.38
	region	CHN	COO-rv	8.77	8703.25								region	EAF	COG-rv	4.27	9948.38
	region	CHN	COO-rv	8.77	8705								region	EAF	COG-rv	4.27	9948.51
	region	OEA	COO-rv	8.77	8705								region	IND	COG-rv	4.27	9948.51
	region	OEA	COO-rv	8.77	8705.54								region	IND	COG-rv	4.27	9954.2
	region	IND	COO-rv	8.77	8705.54								region	OSA	COG-rv	4.27	9954.2
	region	IND	COO-rv	8.77	8709.73								region	OSA	COG-rv	4.27	9956.29
	region	OSA	COO-rv	8.77	8709.73								region	JPN	COG-rv	4.27	9956.29
	region	OSA	COO-rv	8.77	8709.98								region	JPN	COG-rv	4.27	9956.33
	region	OCN	COO-rv	8.77	8709.98								region	PAS	COG-rv	4.27	9956.33
	region	OCN	COO-rv	8.77	8714.11								region	PAS	COG-rv	4.27	9975.46
	region	PAS	COO-rv	8.77	8714.11								region	LAC	COG-rv	4.27	9975.46
	region	PAS	COO-rv	8.77	8725.65								region	LAC	COG-rv	4.27	9985.62
	region	LAC	COO-rv	8.77	8725.65								region	USA	COG-rs	4.27	9985.62
	region	LAC	COO-rv	8.77	8809.45								region	USA	COG-rs	4.27	10055
	region	USA	COO-rs	8.77	8809.45								region	CAN	COG-rs	4.27	10055
	region	USA	COO-rs	8.77	8819.96								region	CAN	COG-rs	4.27	10058.3
	region	WCA	COO-rs	8.77	8819.96								region	WEU	COG-rs	4.27	10058.3
	region	WCA	COO-rs	8.77	8879.84								region	WEU	COG-rs	4.27	10085.7
	region	SAF	COO-rs	8.77	8879.84								region	EEU	COG-rs	4.27	10085.7
	region	SAF	COO-rs	8.77	8891.62								region	EEU	COG-rs	4.27	10086.1
	region	PAS	COO-rs	8.77	8891.62								region	WCA	COG-rs	4.27	10086.1
	region	PAS	COO-rs	8.77	8895.07								region	WCA	COG-rs	4.27	10105.3
	region	LAC	COO-rs	8.77	8895.07								region	SAF	COG-rs	4.27	10105.3
	region	LAC	COO-rs	8.77	8910.47								region	SAF	COG-rs	4.27	10110.3
	region	FSU	COO-rs	9.565	8910.47								region	CHN	COG-rs	4.27	10110.3
	region	FSU	COO-rs	9.565	8986.11								region	CHN	COG-rs	4.27	10137.4
	region	CAN	COO-rv	9.72	8986.11								region	OEA	COG-rs	4.27	10137.4
	region	CAN	COO-rv	9.72	8991.45								region	OEA	COG-rs	4.27	10141.8
	region	WEU	COO-rv	9.72	8991.45								region	IND	COG-rs	4.27	10141.8
	region	WEU	COO-rv	9.72	9013.45								region	IND	COG-rs	4.27	10143.5
	region	EEU	COO-rv	9.72	9013.45								region	OSA	COG-rs	4.27	10143.5
	region	EEU	COO-rv	9.72	9014.74								region	OSA	COG-rs	4.27	10150.5
	region	NAF	COO-rv	9.72	9014.74								region	OCN	COG-rs	4.27	10150.5
	region	NAF	COO-rv	9.72	9017.95								region	OCN	COG-rs	4.27	10159.1
	region	EAF	COO-rv	9.72	9017.95								region	PAS	COG-rs	4.27	10159.1
	region	EAF	COO-rv	9.72	9017.98								region	PAS	COG-rs	4.27	10183.5
	region	CHN	COO-rv	9.72	9017.98								region	LAC	COG-rs	4.27	10183.5
	region	CHN	COO-rv	9.72	9037.23								region	LAC	COG-rs	4.27	10212.2
	region	OEA	COO-rv	9.72	9037.23								region	FSU	COG-rs	4.445	10212.2
	region	OEA	COO-rv	9.72	9043.19								region	FSU	COG-rs	4.445	10447.7
	region	IND	COO-rv	9.72	9043.19								region	MEE	COG-rs	4.445	10447.7
	region	IND	COO-rv	9.72	9046.65								region	MEE	COG-rs	4.445	10499.4
	region	OSA	COO-rv	9.72	9046.65								region	USA	CMG-rv	4.5	10499.4
	region	OSA	COO-rv	9.72	9046.86								region	USA	CMG-rv	4.5	10592.5
	region	OCN	COO-rv	9.72	9046.86								region	CAN	CMG-rv	4.5	10592.5
	region	OCN	COO-rv	9.72	9048.09								region	CAN	CMG-rv	4.5	10618.6
	region	USA	COO-rs	9.72	9048.09								region	WEU	CMG-rv	4.5	10618.6
	region	USA	COO-rs	9.72	9113.51								region	WEU	CMG-rv	4.5	10644.7
	region	CAN	COO-rs	9.72	9113.51								region	EEU	CMG-rv	4.5	10644.7
	region	CAN	COO-rs	9.72	9114.77								region	EEU	CMG-rv	4.5	10652.2
	region	WEU	COO-rs	9.72	9114.77								region	FSU	CMG-rv	4.5	10652.2
	region	WEU	COO-rs	9.72	9135.9								region	FSU	CMG-rv	4.5	10726.7
	region	EEU	COO-rs	9.72	9135.9								region	NAF	CMG-rv	4.5	10726.7
	region	EEU	COO-rs	9.72	9136.31								region	NAF	CMG-rv	4.5	10741.6
	region	NAF	COO-rs	9.72	9136.31								region	EAF	CMG-rv	4.5	10741.6
	region	NAF	COO-rs	9.72	9176.34								region	EAF	CMG-rv	4.5	10749.1
	region	EAF	COO-rs	9.72	9176.34								region	WCA	CMG-rv	4.5	10749.1
	region	EAF	COO-rs	9.72	9179.17								region	WCA	CMG-rv	4.5	10756.6
	region	WCA	COO-rs	9.72	9179.17								region	SAF	CMG-rv	4.5	10756.6
	region	WCA	COO-rs	9.72	9189.58								region	SAF	CMG-rv	4.5	10764.1
	region	SAF	COO-rs	9.72	9189.58								region	MEE	CMG-rv	4.5	10764.1
	region	SAF	COO-rs	9.72	9212.97								region	MEE	CMG-rv	4.5	10771.6
	region	CHN	COO-rs	9.72	9212.97								region	CHN	CMG-rv	4.5	10771.6
	region	CHN	COO-rs	9.72	9219.07								region	CHN	CMG-rv	4.5	10827.5
	region	OEA	COO-rs	9.72	9219.07								region	IND	CMG-rv	4.5	10827.5
	region	OEA	COO-rs	9.72	9221.08								region	IND	CMG-rv	4.5	10853.6
	region	IND	COO-rs	9.72	9221.08								region	OSA	CMG-rv	4.5	10853.6
	region	IND	COO-rs	9.72	9224.65								region	OSA	CMG-rv	4.5	10857.3
	region	OSA	COO-rs	9.72	9224.65								region	JPN	CMG-rv	4.5	10857.3
	region	OSA	COO-rs	9.72	9227.38								region	JPN	CMG-rv	4.5	10861
	region	OCN	COO-rs	9.72	9227.38								region	OCN	CMG-rv	4.5	10861
	region	OCN	COO-rs	9.72	9237.35								region	OCN	CMG-rv	4.5	10879.6
	region	PAS	COO-rs	9.72	9237.35								region	PAS	CMG-rv	4.5	10879.6
	region	PAS	COO-rs	9.72	9253.67								region	PAS	CMG-rv	4.5	10883.3
	region	LAC	COO-rs	9.72	9253.67								region	LAC	CMG-rv	4.5	10883.3
	region	LAC	COO-rs	9.72	9368.75								region	LAC	CMG-rv	4.5	10905.7
	region	USA	EHO-rv	10.5263	9368.75								region	USA	COG-rv	4.7	10905.7
	region	USA	EHO-rv	10.5263	9373.37								region	USA	COG-rv	4.7	10916.1
	region	CAN	EHO-rv	10.5263	9373.37								region	CAN	COG-rv	4.7	10916.1
	region	CAN	EHO-rv	10.5263	9373.37								region	CAN	COG-rv	4.7	10920.7
	region	WEU	EHO-rv	10.5263	9373.37								region	WEU	COG-rv	4.7	10920.7
	region	WEU	EHO-rv	10.5263	9373.43								region	WEU	COG-rv	4.7	10920.7
	region	EEU	EHO-rv	10.5263	9373.43								region	EEU	COG-rv	4.7	10920.7
	region	EEU	EHO-rv	10.5263	9373.45								region	EEU	COG-rv	4.7	10923
	region	FSU	EHO-rv	10.5263	9373.45								region	NAF	COG-rv	4.7	10923
	region	FSU	EHO-rv	10.5263	9373.52								region	NAF	COG-rv	4.7	10964.1
	region	NAF	EHO-rv	10.5263	9373.52								region	EAF	COG-rv	4.7	10964.1
	region	NAF	EHO-rv	10.5263	9373.54								region	EAF	COG-rv	4.7	10964.3
	region	MEE	EHO-rv	10.5263	9373.54								region	IND	COG-rv	4.7	10964.3
	region	MEE	EHO-rv	10.5263	9373.54								region	IND	COG-rv	4.7	10970
	region	CHN	EHO-rv	10.5263	9373.54								region	OSA	COG-rv	4.7	10970
	region	CHN	EHO-rv	10.5263	9373.89								region	OSA	COG-rv	4.7	10972.1
	region	LAC	EHO-rv	10.5263	9373.89								region	JPN	COG-rv	4.7	10972.1
	region	LAC	EHO-rv	10.5263	9398.73								region	JPN	COG-rv	4.7	10972.1
	region	CAN	TAO-rv	10.5263	9398.73								region	PAS	COG-rv	4.7	10972.1
	region	CAN	TAO-rv	10.5263	9478.38								region	PAS	COG-rv	4.7	10991.2
	region	WEU	TAO-rv	10.5263	9478.38								region	LAC	COG-rv	4.7	10991.2
	region	WEU	TAO-rv	10.5263	9478.46								region	LAC	COG-rv	4.7	11001.4
	region	FSU	TAO-rv	10.5263	9478.46								region	USA	COG-rs	4.7	11001.4
	region	FSU	TAO-rv	10.5263	9530.3								region	USA	COG-rs	4.7	11070.8
	region	EAF	TAO-rv	10.5263	9530.3								region	CAN	COG-rs	4.7	11070.8
	region	EAF	TAO-rv	10.5263	9530.37								region	CAN	COG-rs	4.7	11074
	region	WCA	TAO-rv	10.5263	9530.37								region	WEU	COG-rs	4.7	11074
	region	WCA	TAO-rv	10.5263	9530.65								region	WEU	COG-rs	4.7	11101.4
	region	SAF	TAO-rv	10.5263	9530.65								region	EEU	COG-rs	4.7	11101.4
	region	SAF	TAO-rv	10.5263	9530.8								region	EEU	COG-rs	4.7	11101.9
	region	PAS	TAO-rv	10.5263	9530.8								region	WCA	COG-rs	4.7	11101.9
	region	PAS	TAO-rv	10.5263	9531.07								region	WCA	COG-rs	4.7	11121.1
	region	USA	SHO-rv	10.5263	9531.07								region	SAF	COG-rs	4.7	11121.1
	region	USA	SHO-rv	10.5263	9625.95								region	SAF	COG-rs	4.7	11126.1
	region	WEU	SHO-rv	10.5263	9625.95								region	CHN	COG-rs	4.7	11126.1
	region	WEU	SHO-rv	10.5263	9626.28								region	CHN	COG-rs	4.7	11153.2
	region	EEU	SHO-rv	10.5263	9626.28								region	OEA	COG-rs	4.7	11153.2
	region	EEU	SHO-rv	10.5263	9626.28								region	OEA	COG-rs	4.7	11157.6
	region	FSU	SHO-rv	10.5263	9626.28								region	IND	COG-rs	4.7	11157.6
	region	FSU	SHO-rv	10.5263	9626.99								region	IND	COG-rs	4.7	11159.3
	region	NAF	SHO-rv	10.5263	9626.99								region	OSA	COG-rs	4.7	11159.3
	region	NAF	SHO-rv	10.5263	9627.43								region	OSA	COG-rs	4.7	11166.2
	region	MEE	SHO-rv	10.5263	9627.43								region	OCN	COG-rs	4.7	11166.2
	region	MEE	SHO-rv	10.5263	9629.98								region	OCN	COG-rs	4.7	11174.9
	region	CHN	SHO-rv	10.5263	9629.98								region	PAS	COG-rs	4.7	11174.9
	region	CHN	SHO-rv	10.5263	9630.53								region	PAS	COG-rs	4.7	11199.3
	region	OCN	SHO-rv	10.5263	9630.53								region	LAC	COG-rs	4.7	11199.3
	region	OCN	SHO-rv	10.5263	9632.54								region	LAC	COG-rs	4.7	11228
	region	PAS	SHO-rv	10.5263	9632.54								region	USA	SHG-rv	4.71	11228
	region	PAS	SHO-rv	10.5263	9633.48								region	USA	SHG-rv	4.71	11295.1
	region	LAC	SHO-rv	10.5263	9633.48								region	CAN	SHG-rv	4.71	11295.1
	region	LAC	SHO-rv	10.5263	9634								region	CAN	SHG-rv	4.71	11301.8
	region	CAN	COO-rv	10.79	9634								region	WEU	SHG-rv	4.71	11301.8
	region	CAN	COO-rv	10.79	9639.33								region	WEU	SHG-rv	4.71	11309.8
	region	WEU	COO-rv	10.79	9639.33								region	EEU	SHG-rv	4.71	11309.8
	region	WEU	COO-rv	10.79	9661.33								region	EEU	SHG-rv	4.71	11317.9
	region	EEU	COO-rv	10.79	9661.33								region	FSU	SHG-rv	4.71	11317.9
	region	EEU	COO-rv	10.79	9662.63								region	FSU	SHG-rv	4.71	11398.4
	region	NAF	COO-rv	10.79	9662.63								region	NAF	SHG-rv	4.71	11398.4
	region	NAF	COO-rv	10.79	9665.84								region	NAF	SHG-rv	4.71	11403.7
	region	EAF	COO-rv	10.79	9665.84								region	EAF	SHG-rv	4.71	11403.7
	region	EAF	COO-rv	10.79	9665.87								region	EAF	SHG-rv	4.71	11406.4
	region	CHN	COO-rv	10.79	9665.87								region	WCA	SHG-rv	4.71	11406.4
	region	CHN	COO-rv	10.79	9685.12								region	WCA	SHG-rv	4.71	11417.1
	region	OEA	COO-rv	10.79	9685.12								region	SAF	SHG-rv	4.71	11417.1
	region	OEA	COO-rv	10.79	9691.08								region	SAF	SHG-rv	4.71	11419.8
	region	IND	COO-rv	10.79	9691.08								region	MEE	SHG-rv	4.71	11419.8
	region	IND	COO-rv	10.79	9694.54								region	MEE	SHG-rv	4.71	11425.2
	region	OSA	COO-rv	10.79	9694.54								region	CHN	SHG-rv	4.71	11425.2
	region	OSA	COO-rv	10.79	9694.75								region	CHN	SHG-rv	4.71	11427.9
	region	OCN	COO-rv	10.79	9694.75								region	OEA	SHG-rv	4.71	11427.9
	region	OCN	COO-rv	10.79	9695.98								region	OEA	SHG-rv	4.71	11430.6
	region	USA	COO-rs	10.79	9695.98								region	IND	SHG-rv	4.71	11430.6
	region	USA	COO-rs	10.79	9761.4								region	IND	SHG-rv	4.71	11433.3
	region	CAN	COO-rs	10.79	9761.4								region	OSA	SHG-rv	4.71	11433.3
	region	CAN	COO-rs	10.79	9762.66								region	OSA	SHG-rv	4.71	11441.4
	region	WEU	COO-rs	10.79	9762.66								region	OCN	SHG-rv	4.71	11441.4
	region	WEU	COO-rs	10.79	9783.79								region	OCN	SHG-rv	4.71	11446.7
	region	EEU	COO-rs	10.79	9783.79								region	PAS	SHG-rv	4.71	11446.7
	region	EEU	COO-rs	10.79	9784.2								region	PAS	SHG-rv	4.71	11449.4
	region	NAF	COO-rs	10.79	9784.2								region	LAC	SHG-rv	4.71	11449.4
	region	NAF	COO-rs	10.79	9824.23								region	LAC	SHG-rv	4.71	11454.8
	region	EAF	COO-rs	10.79	9824.23								region	USA	TIG-rv	4.995	11454.8
	region	EAF	COO-rs	10.79	9827.06								region	USA	TIG-rv	4.995	11650.5
	region	WCA	COO-rs	10.79	9827.06								region	CAN	TIG-rv	4.995	11650.5
	region	WCA	COO-rs	10.79	9837.47								region	CAN	TIG-rv	4.995	11748.3
	region	SAF	COO-rs	10.79	9837.47								region	WEU	TIG-rv	4.995	11748.3
	region	SAF	COO-rs	10.79	9860.86								region	WEU	TIG-rv	4.995	11774.4
	region	CHN	COO-rs	10.79	9860.86								region	EEU	TIG-rv	4.995	11774.4
	region	CHN	COO-rs	10.79	9866.96								region	EEU	TIG-rv	4.995	11800.4
	region	OEA	COO-rs	10.79	9866.96								region	FSU	TIG-rv	4.995	11800.4
	region	OEA	COO-rs	10.79	9868.97								region	FSU	TIG-rv	4.995	11983
	region	IND	COO-rs	10.79	9868.97								region	NAF	TIG-rv	4.995	11983
	region	IND	COO-rs	10.79	9872.54								region	NAF	TIG-rv	4.995	12035.1
	region	OSA	COO-rs	10.79	9872.54								region	EAF	TIG-rv	4.995	12035.1
	region	OSA	COO-rs	10.79	9875.26								region	EAF	TIG-rv	4.995	12061.2
	region	OCN	COO-rs	10.79	9875.26								region	WCA	TIG-rv	4.995	12061.2
	region	OCN	COO-rs	10.79	9885.24								region	WCA	TIG-rv	4.995	12139.4
	region	PAS	COO-rs	10.79	9885.24								region	SAF	TIG-rv	4.995	12139.4
	region	PAS	COO-rs	10.79	9901.56								region	SAF	TIG-rv	4.995	12159
	region	LAC	COO-rs	10.79	9901.56								region	MEE	TIG-rv	4.995	12159
	region	LAC	COO-rs	10.79	10016.6								region	MEE	TIG-rv	4.995	12256.8
	region	CAN	COO-rv	11.86	10016.6								region	CHN	TIG-rv	4.995	12256.8
	region	CAN	COO-rv	11.86	10022								region	CHN	TIG-rv	4.995	12276.4
	region	WEU	COO-rv	11.86	10022								region	OEA	TIG-rv	4.995	12276.4
	region	WEU	COO-rv	11.86	10044								region	OEA	TIG-rv	4.995	12296
	region	EEU	COO-rv	11.86	10044								region	IND	TIG-rv	4.995	12296
	region	EEU	COO-rv	11.86	10045.3								region	IND	TIG-rv	4.995	12315.6
	region	NAF	COO-rv	11.86	10045.3								region	OSA	TIG-rv	4.995	12315.6
	region	NAF	COO-rv	11.86	10048.5								region	OSA	TIG-rv	4.995	12354.8
	region	EAF	COO-rv	11.86	10048.5								region	OCN	TIG-rv	4.995	12354.8
	region	EAF	COO-rv	11.86	10048.5								region	OCN	TIG-rv	4.995	12380.9
	region	CHN	COO-rv	11.86	10048.5								region	PAS	TIG-rv	4.995	12380.9
	region	CHN	COO-rv	11.86	10067.8								region	PAS	TIG-rv	4.995	12420.1
	region	OEA	COO-rv	11.86	10067.8								region	LAC	TIG-rv	4.995	12420.1
	region	OEA	COO-rv	11.86	10073.7								region	LAC	TIG-rv	4.995	12459.3
	region	IND	COO-rv	11.86	10073.7								region	FSU	COG-rs	5	12459.3
	region	IND	COO-rv	11.86	10077.2								region	FSU	COG-rs	5	12616.3
	region	OSA	COO-rv	11.86	10077.2								region	USA	COG-rv	5.13	12616.3
	region	OSA	COO-rv	11.86	10077.4								region	USA	COG-rv	5.13	12626.7
	region	OCN	COO-rv	11.86	10077.4								region	CAN	COG-rv	5.13	12626.7
	region	OCN	COO-rv	11.86	10078.6								region	CAN	COG-rv	5.13	12631.3
	region	USA	COO-rs	11.86	10078.6								region	WEU	COG-rv	5.13	12631.3
	region	USA	COO-rs	11.86	10144								region	WEU	COG-rv	5.13	12631.3
	region	CAN	COO-rs	11.86	10144								region	EEU	COG-rv	5.13	12631.3
	region	CAN	COO-rs	11.86	10145.3								region	EEU	COG-rv	5.13	12633.7
	region	WEU	COO-rs	11.86	10145.3								region	NAF	COG-rv	5.13	12633.7
	region	WEU	COO-rs	11.86	10166.4								region	NAF	COG-rv	5.13	12674.8
	region	EEU	COO-rs	11.86	10166.4								region	EAF	COG-rv	5.13	12674.8
	region	EEU	COO-rs	11.86	10166.8								region	EAF	COG-rv	5.13	12674.9
	region	NAF	COO-rs	11.86	10166.8								region	IND	COG-rv	5.13	12674.9
	region	NAF	COO-rs	11.86	10206.9								region	IND	COG-rv	5.13	12680.6
	region	EAF	COO-rs	11.86	10206.9								region	OSA	COG-rv	5.13	12680.6
	region	EAF	COO-rs	11.86	10209.7								region	OSA	COG-rv	5.13	12682.7
	region	WCA	COO-rs	11.86	10209.7								region	JPN	COG-rv	5.13	12682.7
	region	WCA	COO-rs	11.86	10220.1								region	JPN	COG-rv	5.13	12682.7
	region	SAF	COO-rs	11.86	10220.1								region	PAS	COG-rv	5.13	12682.7
	region	SAF	COO-rs	11.86	10243.5								region	PAS	COG-rv	5.13	12701.8
	region	CHN	COO-rs	11.86	10243.5								region	LAC	COG-rv	5.13	12701.8
	region	CHN	COO-rs	11.86	10249.6								region	LAC	COG-rv	5.13	12712
	region	OEA	COO-rs	11.86	10249.6								region	USA	COG-rs	5.13	12712
	region	OEA	COO-rs	11.86	10251.6								region	USA	COG-rs	5.13	12781.4
	region	IND	COO-rs	11.86	10251.6								region	CAN	COG-rs	5.13	12781.4
	region	IND	COO-rs	11.86	10255.2								region	CAN	COG-rs	5.13	12784.7
	region	OSA	COO-rs	11.86	10255.2								region	WEU	COG-rs	5.13	12784.7
	region	OSA	COO-rs	11.86	10257.9								region	WEU	COG-rs	5.13	12812
	region	OCN	COO-rs	11.86	10257.9								region	EEU	COG-rs	5.13	12812
	region	OCN	COO-rs	11.86	10267.9								region	EEU	COG-rs	5.13	12812.5
	region	PAS	COO-rs	11.86	10267.9								region	WCA	COG-rs	5.13	12812.5
	region	PAS	COO-rs	11.86	10284.2								region	WCA	COG-rs	5.13	12831.7
	region	LAC	COO-rs	11.86	10284.2								region	SAF	COG-rs	5.13	12831.7
	region	LAC	COO-rs	11.86	10399.3								region	SAF	COG-rs	5.13	12836.7
	region	CAN	COO-rv	12.93	10399.3								region	CHN	COG-rs	5.13	12836.7
	region	CAN	COO-rv	12.93	10404.6								region	CHN	COG-rs	5.13	12863.8
	region	WEU	COO-rv	12.93	10404.6								region	OEA	COG-rs	5.13	12863.8
	region	WEU	COO-rv	12.93	10426.6								region	OEA	COG-rs	5.13	12868.2
	region	EEU	COO-rv	12.93	10426.6								region	IND	COG-rs	5.13	12868.2
	region	EEU	COO-rv	12.93	10427.9								region	IND	COG-rs	5.13	12869.9
	region	NAF	COO-rv	12.93	10427.9								region	OSA	COG-rs	5.13	12869.9
	region	NAF	COO-rv	12.93	10431.1								region	OSA	COG-rs	5.13	12876.9
	region	EAF	COO-rv	12.93	10431.1								region	OCN	COG-rs	5.13	12876.9
	region	EAF	COO-rv	12.93	10431.2								region	OCN	COG-rs	5.13	12885.5
	region	CHN	COO-rv	12.93	10431.2								region	PAS	COG-rs	5.13	12885.5
	region	CHN	COO-rv	12.93	10450.4								region	PAS	COG-rs	5.13	12909.9
	region	OEA	COO-rv	12.93	10450.4								region	LAC	COG-rs	5.13	12909.9
	region	OEA	COO-rv	12.93	10456.4								region	LAC	COG-rs	5.13	12938.6
	region	IND	COO-rv	12.93	10456.4								region	FSU	COG-rs	5.49	12938.6
	region	IND	COO-rv	12.93	10459.8								region	FSU	COG-rs	5.49	13095.6
	region	OSA	COO-rv	12.93	10459.8								region	USA	CMG-rv	5.55	13095.6
	region	OSA	COO-rv	12.93	10460								region	USA	CMG-rv	5.55	13212
	region	OCN	COO-rv	12.93	10460								region	CAN	CMG-rv	5.55	13212
	region	OCN	COO-rv	12.93	10461.3								region	CAN	CMG-rv	5.55	13244.6
	region	USA	COO-rs	12.93	10461.3								region	WEU	CMG-rv	5.55	13244.6
	region	USA	COO-rs	12.93	10526.7								region	WEU	CMG-rv	5.55	13277.2
	region	CAN	COO-rs	12.93	10526.7								region	EEU	CMG-rv	5.55	13277.2
	region	CAN	COO-rs	12.93	10527.9								region	EEU	CMG-rv	5.55	13286.6
	region	WEU	COO-rs	12.93	10527.9								region	FSU	CMG-rv	5.55	13286.6
	region	WEU	COO-rs	12.93	10549.1								region	FSU	CMG-rv	5.55	13379.7
	region	EEU	COO-rs	12.93	10549.1								region	NAF	CMG-rv	5.55	13379.7
	region	EEU	COO-rs	12.93	10549.5								region	NAF	CMG-rv	5.55	13398.3
	region	NAF	COO-rs	12.93	10549.5								region	EAF	CMG-rv	5.55	13398.3
	region	NAF	COO-rs	12.93	10589.5								region	EAF	CMG-rv	5.55	13407.7
	region	EAF	COO-rs	12.93	10589.5								region	WCA	CMG-rv	5.55	13407.7
	region	EAF	COO-rs	12.93	10592.3								region	WCA	CMG-rv	5.55	13417.1
	region	WCA	COO-rs	12.93	10592.3								region	SAF	CMG-rv	5.55	13417.1
	region	WCA	COO-rs	12.93	10602.8								region	SAF	CMG-rv	5.55	13426.5
	region	SAF	COO-rs	12.93	10602.8								region	MEE	CMG-rv	5.55	13426.5
	region	SAF	COO-rs	12.93	10626.1								region	MEE	CMG-rv	5.55	13435.8
	region	CHN	COO-rs	12.93	10626.1								region	CHN	CMG-rv	5.55	13435.8
	region	CHN	COO-rs	12.93	10632.2								region	CHN	CMG-rv	5.55	13505.7
	region	OEA	COO-rs	12.93	10632.2								region	IND	CMG-rv	5.55	13505.7
	region	OEA	COO-rs	12.93	10634.3								region	IND	CMG-rv	5.55	13538.3
	region	IND	COO-rs	12.93	10634.3								region	OSA	CMG-rv	5.55	13538.3
	region	IND	COO-rs	12.93	10637.8								region	OSA	CMG-rv	5.55	13543
	region	OSA	COO-rs	12.93	10637.8								region	JPN	CMG-rv	5.55	13543
	region	OSA	COO-rs	12.93	10640.6								region	JPN	CMG-rv	5.55	13547.6
	region	OCN	COO-rs	12.93	10640.6								region	OCN	CMG-rv	5.55	13547.6
	region	OCN	COO-rs	12.93	10650.5								region	OCN	CMG-rv	5.55	13570.8
	region	PAS	COO-rs	12.93	10650.5								region	PAS	CMG-rv	5.55	13570.8
	region	PAS	COO-rs	12.93	10666.8								region	PAS	CMG-rv	5.55	13575.5
	region	LAC	COO-rs	12.93	10666.8								region	LAC	CMG-rv	5.55	13575.5
	region	LAC	COO-rs	12.93	10781.9								region	LAC	CMG-rv	5.55	13603.5
	region	USA	EHO-rv	13.1579	10781.9								region	NAF	COG-rv	5.56	13603.5
	region	USA	EHO-rv	13.1579	10789.6								region	NAF	COG-rv	5.56	13610.6
	region	CAN	EHO-rv	13.1579	10789.6								region	EAF	COG-rv	5.56	13610.6
	region	CAN	EHO-rv	13.1579	10789.6								region	EAF	COG-rv	5.56	13610.6
	region	WEU	EHO-rv	13.1579	10789.6								region	USA	COG-rs	5.56	13610.6
	region	WEU	EHO-rv	13.1579	10789.8								region	USA	COG-rs	5.56	13653.6
	region	EEU	EHO-rv	13.1579	10789.8								region	CAN	COG-rs	5.56	13653.6
	region	EEU	EHO-rv	13.1579	10789.8								region	CAN	COG-rs	5.56	13674.6
	region	FSU	EHO-rv	13.1579	10789.8								region	WEU	COG-rs	5.56	13674.6
	region	FSU	EHO-rv	13.1579	10789.9								region	WEU	COG-rs	5.56	13688.3
	region	NAF	EHO-rv	13.1579	10789.9								region	EEU	COG-rs	5.56	13688.3
	region	NAF	EHO-rv	13.1579	10789.9								region	EEU	COG-rs	5.56	13690.1
	region	MEE	EHO-rv	13.1579	10789.9								region	NAF	COG-rs	5.56	13690.1
	region	MEE	EHO-rv	13.1579	10789.9								region	NAF	COG-rs	5.56	13729.5
	region	CHN	EHO-rv	13.1579	10789.9								region	EAF	COG-rs	5.56	13729.5
	region	CHN	EHO-rv	13.1579	10790.4								region	EAF	COG-rs	5.56	13732.2
	region	LAC	EHO-rv	13.1579	10790.4								region	WCA	COG-rs	5.56	13732.2
	region	LAC	EHO-rv	13.1579	10812.1								region	WCA	COG-rs	5.56	13737
	region	CAN	TAO-rv	13.1579	10812.1								region	SAF	COG-rs	5.56	13737
	region	CAN	TAO-rv	13.1579	10944.9								region	SAF	COG-rs	5.56	13739.3
	region	WEU	TAO-rv	13.1579	10944.9								region	CHN	COG-rs	5.56	13739.3
	region	WEU	TAO-rv	13.1579	10945.1								region	CHN	COG-rs	5.56	13752.8
	region	FSU	TAO-rv	13.1579	10945.1								region	OEA	COG-rs	5.56	13752.8
	region	FSU	TAO-rv	13.1579	11022.9								region	OEA	COG-rs	5.56	13755
	region	EAF	TAO-rv	13.1579	11022.9								region	IND	COG-rs	5.56	13755
	region	EAF	TAO-rv	13.1579	11023.1								region	IND	COG-rs	5.56	13757.6
	region	WCA	TAO-rv	13.1579	11023.1								region	OSA	COG-rs	5.56	13757.6
	region	WCA	TAO-rv	13.1579	11023.5								region	OSA	COG-rs	5.56	13762.7
	region	SAF	TAO-rv	13.1579	11023.5								region	OCN	COG-rs	5.56	13762.7
	region	SAF	TAO-rv	13.1579	11023.9								region	OCN	COG-rs	5.56	13765.6
	region	PAS	TAO-rv	13.1579	11023.9								region	PAS	COG-rs	5.56	13765.6
	region	PAS	TAO-rv	13.1579	11024.2								region	PAS	COG-rs	5.56	13789.7
	region	USA	SHO-rv	13.1579	11024.2								region	LAC	COG-rs	5.56	13789.7
	region	USA	SHO-rv	13.1579	11182.3								region	LAC	COG-rs	5.56	13815.7
	region	WEU	SHO-rv	13.1579	11182.3								region	USA	SHG-rv	5.809	13815.7
	region	WEU	SHO-rv	13.1579	11183.2								region	USA	SHG-rv	5.809	13899.5
	region	EEU	SHO-rv	13.1579	11183.2								region	CAN	SHG-rv	5.809	13899.5
	region	EEU	SHO-rv	13.1579	11183.2								region	CAN	SHG-rv	5.809	13907.9
	region	FSU	SHO-rv	13.1579	11183.2								region	WEU	SHG-rv	5.809	13907.9
	region	FSU	SHO-rv	13.1579	11184.2								region	WEU	SHG-rv	5.809	13918
	region	NAF	SHO-rv	13.1579	11184.2								region	EEU	SHG-rv	5.809	13918
	region	NAF	SHO-rv	13.1579	11184.8								region	EEU	SHG-rv	5.809	13928
	region	MEE	SHO-rv	13.1579	11184.8								region	FSU	SHG-rv	5.809	13928
	region	MEE	SHO-rv	13.1579	11185.4								region	FSU	SHG-rv	5.809	14028.6
	region	CHN	SHO-rv	13.1579	11185.4								region	NAF	SHG-rv	5.809	14028.6
	region	CHN	SHO-rv	13.1579	11186.2								region	NAF	SHG-rv	5.809	14035.3
	region	OCN	SHO-rv	13.1579	11186.2								region	EAF	SHG-rv	5.809	14035.3
	region	OCN	SHO-rv	13.1579	11188.4								region	EAF	SHG-rv	5.809	14038.7
	region	PAS	SHO-rv	13.1579	11188.4								region	WCA	SHG-rv	5.809	14038.7
	region	PAS	SHO-rv	13.1579	11189.5								region	WCA	SHG-rv	5.809	14052.1
	region	LAC	SHO-rv	13.1579	11189.5								region	SAF	SHG-rv	5.809	14052.1
	region	LAC	SHO-rv	13.1579	11190								region	SAF	SHG-rv	5.809	14055.5
	region	USA	COO-rs	14	11190								region	MEE	SHG-rv	5.809	14055.5
	region	USA	COO-rs	14	11219								region	MEE	SHG-rv	5.809	14062.2
	region	CAN	COO-rs	14	11219								region	CHN	SHG-rv	5.809	14062.2
	region	CAN	COO-rs	14	11243								region	CHN	SHG-rv	5.809	14065.6
	region	WEU	COO-rs	14	11243								region	OEA	SHG-rv	5.809	14065.6
	region	WEU	COO-rs	14	11268.4								region	OEA	SHG-rv	5.809	14068.9
	region	EEU	COO-rs	14	11268.4								region	IND	SHG-rv	5.809	14068.9
	region	EEU	COO-rs	14	11271.2								region	IND	SHG-rv	5.809	14072.3
	region	NAF	COO-rs	14	11271.2								region	OSA	SHG-rv	5.809	14072.3
	region	NAF	COO-rs	14	11277.2								region	OSA	SHG-rv	5.809	14082.4
	region	EAF	COO-rs	14	11277.2								region	OCN	SHG-rv	5.809	14082.4
	region	EAF	COO-rs	14	11277.6								region	OCN	SHG-rv	5.809	14089.1
	region	WCA	COO-rs	14	11277.6								region	PAS	SHG-rv	5.809	14089.1
	region	WCA	COO-rs	14	11282.8								region	PAS	SHG-rv	5.809	14092.5
	region	SAF	COO-rs	14	11282.8								region	LAC	SHG-rv	5.809	14092.5
	region	SAF	COO-rs	14	11285.2								region	LAC	SHG-rv	5.809	14099.2
	region	CHN	COO-rs	14	11285.2								region	FSU	COG-rs	5.98	14099.2
	region	CHN	COO-rs	14	11303.3								region	FSU	COG-rs	5.98	14256.2
	region	OEA	COO-rs	14	11303.3								region	USA	DEG-rv	6	14256.2
	region	OEA	COO-rs	14	11309.3								region	USA	DEG-rv	6	14330.7
	region	IND	COO-rs	14	11309.3								region	CAN	DEG-rv	6	14330.7
	region	IND	COO-rs	14	11310								region	CAN	DEG-rv	6	14349.3
	region	OSA	COO-rs	14	11310								region	WEU	DEG-rv	6	14349.3
	region	OSA	COO-rs	14	11310.5								region	WEU	DEG-rv	6	14360.5
	region	OCN	COO-rs	14	11310.5								region	EEU	DEG-rv	6	14360.5
	region	OCN	COO-rs	14	11311.5								region	EEU	DEG-rv	6	14371.7
	region	PAS	COO-rs	14	11311.5								region	FSU	DEG-rv	6	14371.7
	region	PAS	COO-rs	14	11313.8								region	FSU	DEG-rv	6	14483.5
	region	LAC	COO-rs	14	11313.8								region	NAF	DEG-rv	6	14483.5
	region	LAC	COO-rs	14	11336.8								region	NAF	DEG-rv	6	14520.8
	region	USA	COO-rs	15.71	11336.8								region	EAF	DEG-rv	6	14520.8
	region	USA	COO-rs	15.71	11365.8								region	EAF	DEG-rv	6	14532
	region	CAN	COO-rs	15.71	11365.8								region	WCA	DEG-rv	6	14532
	region	CAN	COO-rs	15.71	11389.8								region	WCA	DEG-rv	6	14558.1
	region	WEU	COO-rs	15.71	11389.8								region	SAF	DEG-rv	6	14558.1
	region	WEU	COO-rs	15.71	11415.2								region	SAF	DEG-rv	6	14565.6
	region	EEU	COO-rs	15.71	11415.2								region	MEE	DEG-rv	6	14565.6
	region	EEU	COO-rs	15.71	11418								region	MEE	DEG-rv	6	14591.7
	region	NAF	COO-rs	15.71	11418								region	CHN	DEG-rv	6	14591.7
	region	NAF	COO-rs	15.71	11424								region	CHN	DEG-rv	6	14599.2
	region	EAF	COO-rs	15.71	11424								region	IND	DEG-rv	6	14599.2
	region	EAF	COO-rs	15.71	11424.4								region	IND	DEG-rv	6	14606.7
	region	WCA	COO-rs	15.71	11424.4								region	OSA	DEG-rv	6	14606.7
	region	WCA	COO-rs	15.71	11429.6								region	OSA	DEG-rv	6	14625.3
	region	SAF	COO-rs	15.71	11429.6								region	OCN	DEG-rv	6	14625.3
	region	SAF	COO-rs	15.71	11432								region	OCN	DEG-rv	6	14632.8
	region	CHN	COO-rs	15.71	11432								region	PAS	DEG-rv	6	14632.8
	region	CHN	COO-rs	15.71	11450.1								region	PAS	DEG-rv	6	14640.3
	region	OEA	COO-rs	15.71	11450.1								region	LAC	DEG-rv	6	14640.3
	region	OEA	COO-rs	15.71	11456.1								region	LAC	DEG-rv	6	14662.7
	region	IND	COO-rs	15.71	11456.1								region	USA	TIG-rv	6.129	14662.7
	region	IND	COO-rs	15.71	11456.8								region	USA	TIG-rv	6.129	14897.4
	region	OSA	COO-rs	15.71	11456.8								region	CAN	TIG-rv	6.129	14897.4
	region	OSA	COO-rs	15.71	11457.3								region	CAN	TIG-rv	6.129	15014.8
	region	OCN	COO-rs	15.71	11457.3								region	WEU	TIG-rv	6.129	15014.8
	region	OCN	COO-rs	15.71	11458.4								region	WEU	TIG-rv	6.129	15046.1
	region	PAS	COO-rs	15.71	11458.4								region	EEU	TIG-rv	6.129	15046.1
	region	PAS	COO-rs	15.71	11460.6								region	EEU	TIG-rv	6.129	15077.4
	region	LAC	COO-rs	15.71	11460.6								region	FSU	TIG-rv	6.129	15077.4
	region	LAC	COO-rs	15.71	11483.6								region	FSU	TIG-rv	6.129	15296.4
	region	USA	EHO-rv	15.7895	11483.6								region	NAF	TIG-rv	6.129	15296.4
	region	USA	EHO-rv	15.7895	11489.8								region	NAF	TIG-rv	6.129	15359
	region	CAN	EHO-rv	15.7895	11489.8								region	EAF	TIG-rv	6.129	15359
	region	CAN	EHO-rv	15.7895	11489.8								region	EAF	TIG-rv	6.129	15390.3
	region	WEU	EHO-rv	15.7895	11489.8								region	WCA	TIG-rv	6.129	15390.3
	region	WEU	EHO-rv	15.7895	11489.9								region	WCA	TIG-rv	6.129	15484.2
	region	EEU	EHO-rv	15.7895	11489.9								region	SAF	TIG-rv	6.129	15484.2
	region	EEU	EHO-rv	15.7895	11489.9								region	SAF	TIG-rv	6.129	15507.7
	region	FSU	EHO-rv	15.7895	11489.9								region	MEE	TIG-rv	6.129	15507.7
	region	FSU	EHO-rv	15.7895	11490								region	MEE	TIG-rv	6.129	15625.1
	region	NAF	EHO-rv	15.7895	11490								region	CHN	TIG-rv	6.129	15625.1
	region	NAF	EHO-rv	15.7895	11490								region	CHN	TIG-rv	6.129	15648.6
	region	MEE	EHO-rv	15.7895	11490								region	OEA	TIG-rv	6.129	15648.6
	region	MEE	EHO-rv	15.7895	11490.1								region	OEA	TIG-rv	6.129	15672.1
	region	CHN	EHO-rv	15.7895	11490.1								region	IND	TIG-rv	6.129	15672.1
	region	CHN	EHO-rv	15.7895	11490.8								region	IND	TIG-rv	6.129	15695.6
	region	LAC	EHO-rv	15.7895	11490.8								region	OSA	TIG-rv	6.129	15695.6
	region	LAC	EHO-rv	15.7895	11522.3								region	OSA	TIG-rv	6.129	15742.7
	region	CAN	TAO-rv	15.7895	11522.3								region	OCN	TIG-rv	6.129	15742.7
	region	CAN	TAO-rv	15.7895	11630.1								region	OCN	TIG-rv	6.129	15774
	region	WEU	TAO-rv	15.7895	11630.1								region	PAS	TIG-rv	6.129	15774
	region	WEU	TAO-rv	15.7895	11630.2								region	PAS	TIG-rv	6.129	15821
	region	FSU	TAO-rv	15.7895	11630.2								region	LAC	TIG-rv	6.129	15821
	region	FSU	TAO-rv	15.7895	11717.9								region	LAC	TIG-rv	6.129	15868.1
	region	WCA	TAO-rv	15.7895	11717.9								region	FSU	COG-rs	6.47	15868.1
	region	WCA	TAO-rv	15.7895	11718.5								region	FSU	COG-rs	6.47	16025
	region	SAF	TAO-rv	15.7895	11718.5								region	NAF	COG-rv	6.67	16025
	region	SAF	TAO-rv	15.7895	11718.9								region	NAF	COG-rv	6.67	16032.2
	region	PAS	TAO-rv	15.7895	11718.9								region	EAF	COG-rv	6.67	16032.2
	region	PAS	TAO-rv	15.7895	11719.1								region	EAF	COG-rv	6.67	16032.2
	region	USA	SHO-rv	15.7895	11719.1								region	USA	COG-rs	6.67	16032.2
	region	USA	SHO-rv	15.7895	11847.5								region	USA	COG-rs	6.67	16075.2
	region	WEU	SHO-rv	15.7895	11847.5								region	CAN	COG-rs	6.67	16075.2
	region	WEU	SHO-rv	15.7895	11847.8								region	CAN	COG-rs	6.67	16096.2
	region	EEU	SHO-rv	15.7895	11847.8								region	WEU	COG-rs	6.67	16096.2
	region	EEU	SHO-rv	15.7895	11847.8								region	WEU	COG-rs	6.67	16109.9
	region	FSU	SHO-rv	15.7895	11847.8								region	EEU	COG-rs	6.67	16109.9
	region	FSU	SHO-rv	15.7895	11849								region	EEU	COG-rs	6.67	16111.7
	region	NAF	SHO-rv	15.7895	11849								region	NAF	COG-rs	6.67	16111.7
	region	NAF	SHO-rv	15.7895	11849.9								region	NAF	COG-rs	6.67	16151.1
	region	MEE	SHO-rv	15.7895	11849.9								region	EAF	COG-rs	6.67	16151.1
	region	MEE	SHO-rv	15.7895	11869.3								region	EAF	COG-rs	6.67	16153.7
	region	CHN	SHO-rv	15.7895	11869.3								region	WCA	COG-rs	6.67	16153.7
	region	CHN	SHO-rv	15.7895	11870.4								region	WCA	COG-rs	6.67	16158.5
	region	OCN	SHO-rv	15.7895	11870.4								region	SAF	COG-rs	6.67	16158.5
	region	OCN	SHO-rv	15.7895	11872								region	SAF	COG-rs	6.67	16160.9
	region	PAS	SHO-rv	15.7895	11872								region	CHN	COG-rs	6.67	16160.9
	region	PAS	SHO-rv	15.7895	11872.7								region	CHN	COG-rs	6.67	16174.4
	region	LAC	SHO-rv	15.7895	11872.7								region	OEA	COG-rs	6.67	16174.4
	region	LAC	SHO-rv	15.7895	11873.3								region	OEA	COG-rs	6.67	16176.6
	region	USA	COO-rs	17.42	11873.3								region	IND	COG-rs	6.67	16176.6
	region	USA	COO-rs	17.42	11902.4								region	IND	COG-rs	6.67	16179.2
	region	CAN	COO-rs	17.42	11902.4								region	OSA	COG-rs	6.67	16179.2
	region	CAN	COO-rs	17.42	11926.4								region	OSA	COG-rs	6.67	16184.3
	region	WEU	COO-rs	17.42	11926.4								region	OCN	COG-rs	6.67	16184.3
	region	WEU	COO-rs	17.42	11951.8								region	OCN	COG-rs	6.67	16187.2
	region	EEU	COO-rs	17.42	11951.8								region	PAS	COG-rs	6.67	16187.2
	region	EEU	COO-rs	17.42	11954.6								region	PAS	COG-rs	6.67	16211.2
	region	NAF	COO-rs	17.42	11954.6								region	LAC	COG-rs	6.67	16211.2
	region	NAF	COO-rs	17.42	11960.6								region	LAC	COG-rs	6.67	16237.3
	region	EAF	COO-rs	17.42	11960.6								region	USA	CMG-rv	6.81	16237.3
	region	EAF	COO-rs	17.42	11961								region	USA	CMG-rv	6.81	16376.9
	region	WCA	COO-rs	17.42	11961								region	CAN	CMG-rv	6.81	16376.9
	region	WCA	COO-rs	17.42	11966.2								region	CAN	CMG-rv	6.81	16416.1
	region	SAF	COO-rs	17.42	11966.2								region	WEU	CMG-rv	6.81	16416.1
	region	SAF	COO-rs	17.42	11968.5								region	WEU	CMG-rv	6.81	16455.2
	region	CHN	COO-rs	17.42	11968.5								region	EEU	CMG-rv	6.81	16455.2
	region	CHN	COO-rs	17.42	11986.7								region	EEU	CMG-rv	6.81	16466.5
	region	OEA	COO-rs	17.42	11986.7								region	FSU	CMG-rv	6.81	16466.5
	region	OEA	COO-rs	17.42	11992.7								region	FSU	CMG-rv	6.81	16578.2
	region	IND	COO-rs	17.42	11992.7								region	NAF	CMG-rv	6.81	16578.2
	region	IND	COO-rs	17.42	11993.4								region	NAF	CMG-rv	6.81	16600.6
	region	OSA	COO-rs	17.42	11993.4								region	EAF	CMG-rv	6.81	16600.6
	region	OSA	COO-rs	17.42	11993.9								region	EAF	CMG-rv	6.81	16611.8
	region	OCN	COO-rs	17.42	11993.9								region	WCA	CMG-rv	6.81	16611.8
	region	OCN	COO-rs	17.42	11994.9								region	WCA	CMG-rv	6.81	16623.1
	region	PAS	COO-rs	17.42	11994.9								region	SAF	CMG-rv	6.81	16623.1
	region	PAS	COO-rs	17.42	11997.1								region	SAF	CMG-rv	6.81	16634.3
	region	LAC	COO-rs	17.42	11997.1								region	MEE	CMG-rv	6.81	16634.3
	region	LAC	COO-rs	17.42	12020.2								region	MEE	CMG-rv	6.81	16645.6
	region	USA	EHO-rv	18.4211	12020.2								region	CHN	CMG-rv	6.81	16645.6
	region	USA	EHO-rv	18.4211	12029.5								region	CHN	CMG-rv	6.81	16729.4
	region	CAN	EHO-rv	18.4211	12029.5								region	IND	CMG-rv	6.81	16729.4
	region	CAN	EHO-rv	18.4211	12029.5								region	IND	CMG-rv	6.81	16768.6
	region	WEU	EHO-rv	18.4211	12029.5								region	OSA	CMG-rv	6.81	16768.6
	region	WEU	EHO-rv	18.4211	12029.7								region	OSA	CMG-rv	6.81	16774.1
	region	EEU	EHO-rv	18.4211	12029.7								region	JPN	CMG-rv	6.81	16774.1
	region	EEU	EHO-rv	18.4211	12029.7								region	JPN	CMG-rv	6.81	16779.7
	region	FSU	EHO-rv	18.4211	12029.7								region	OCN	CMG-rv	6.81	16779.7
	region	FSU	EHO-rv	18.4211	12029.8								region	OCN	CMG-rv	6.81	16807.6
	region	NAF	EHO-rv	18.4211	12029.8								region	PAS	CMG-rv	6.81	16807.6
	region	NAF	EHO-rv	18.4211	12029.9								region	PAS	CMG-rv	6.81	16813.1
	region	MEE	EHO-rv	18.4211	12029.9								region	LAC	CMG-rv	6.81	16813.1
	region	MEE	EHO-rv	18.4211	12029.9								region	LAC	CMG-rv	6.81	16846.7
	region	CHN	EHO-rv	18.4211	12029.9								region	USA	SHG-rv	7.1278	16846.7
	region	CHN	EHO-rv	18.4211	12030.6								region	USA	SHG-rv	7.1278	16947.3
	region	LAC	EHO-rv	18.4211	12030.6								region	CAN	SHG-rv	7.1278	16947.3
	region	LAC	EHO-rv	18.4211	12081								region	CAN	SHG-rv	7.1278	16957.4
	region	CAN	TAO-rv	18.4211	12081								region	WEU	SHG-rv	7.1278	16957.4
	region	CAN	TAO-rv	18.4211	12242.7								region	WEU	SHG-rv	7.1278	16969.4
	region	WEU	TAO-rv	18.4211	12242.7								region	EEU	SHG-rv	7.1278	16969.4
	region	WEU	TAO-rv	18.4211	12242.9								region	EEU	SHG-rv	7.1278	16981.5
	region	FSU	TAO-rv	18.4211	12242.9								region	FSU	SHG-rv	7.1278	16981.5
	region	FSU	TAO-rv	18.4211	12348.2								region	FSU	SHG-rv	7.1278	17102.2
	region	EAF	TAO-rv	18.4211	12348.2								region	NAF	SHG-rv	7.1278	17102.2
	region	EAF	TAO-rv	18.4211	12348.3								region	NAF	SHG-rv	7.1278	17110.3
	region	WCA	TAO-rv	18.4211	12348.3								region	EAF	SHG-rv	7.1278	17110.3
	region	WCA	TAO-rv	18.4211	12348.9								region	EAF	SHG-rv	7.1278	17114.3
	region	SAF	TAO-rv	18.4211	12348.9								region	WCA	SHG-rv	7.1278	17114.3
	region	SAF	TAO-rv	18.4211	12349.2								region	WCA	SHG-rv	7.1278	17130.4
	region	PAS	TAO-rv	18.4211	12349.2								region	SAF	SHG-rv	7.1278	17130.4
	region	PAS	TAO-rv	18.4211	12349.7								region	SAF	SHG-rv	7.1278	17134.5
	region	USA	SHO-rv	18.4211	12349.7								region	MEE	SHG-rv	7.1278	17134.5
	region	USA	SHO-rv	18.4211	12542.3								region	MEE	SHG-rv	7.1278	17142.5
	region	WEU	SHO-rv	18.4211	12542.3								region	CHN	SHG-rv	7.1278	17142.5
	region	WEU	SHO-rv	18.4211	12543								region	CHN	SHG-rv	7.1278	17146.6
	region	EEU	SHO-rv	18.4211	12543								region	OEA	SHG-rv	7.1278	17146.6
	region	EEU	SHO-rv	18.4211	12543								region	OEA	SHG-rv	7.1278	17150.6
	region	FSU	SHO-rv	18.4211	12543								region	IND	SHG-rv	7.1278	17150.6
	region	FSU	SHO-rv	18.4211	12544.5								region	IND	SHG-rv	7.1278	17154.7
	region	NAF	SHO-rv	18.4211	12544.5								region	OSA	SHG-rv	7.1278	17154.7
	region	NAF	SHO-rv	18.4211	12545.3								region	OSA	SHG-rv	7.1278	17166.8
	region	MEE	SHO-rv	18.4211	12545.3								region	OCN	SHG-rv	7.1278	17166.8
	region	MEE	SHO-rv	18.4211	12550.5								region	OCN	SHG-rv	7.1278	17174.8
	region	CHN	SHO-rv	18.4211	12550.5								region	PAS	SHG-rv	7.1278	17174.8
	region	CHN	SHO-rv	18.4211	12551.6								region	PAS	SHG-rv	7.1278	17178.9
	region	OCN	SHO-rv	18.4211	12551.6								region	LAC	SHG-rv	7.1278	17178.9
	region	OCN	SHO-rv	18.4211	12555.7								region	LAC	SHG-rv	7.1278	17186.9
	region	PAS	SHO-rv	18.4211	12555.7								region	USA	DEG-rv	7.4	17186.9
	region	PAS	SHO-rv	18.4211	12557.6								region	USA	DEG-rv	7.4	17280
	region	LAC	SHO-rv	18.4211	12557.6								region	CAN	DEG-rv	7.4	17280
	region	LAC	SHO-rv	18.4211	12558.7								region	CAN	DEG-rv	7.4	17303.3
	region	USA	COO-rs	19.13	12558.7								region	WEU	DEG-rv	7.4	17303.3
	region	USA	COO-rs	19.13	12587.8								region	WEU	DEG-rv	7.4	17317.3
	region	CAN	COO-rs	19.13	12587.8								region	EEU	DEG-rv	7.4	17317.3
	region	CAN	COO-rs	19.13	12611.7								region	EEU	DEG-rv	7.4	17331.3
	region	WEU	COO-rs	19.13	12611.7								region	FSU	DEG-rv	7.4	17331.3
	region	WEU	COO-rs	19.13	12637.1								region	FSU	DEG-rv	7.4	17471
	region	EEU	COO-rs	19.13	12637.1								region	NAF	DEG-rv	7.4	17471
	region	EEU	COO-rs	19.13	12639.9								region	NAF	DEG-rv	7.4	17517.7
	region	NAF	COO-rs	19.13	12639.9								region	EAF	DEG-rv	7.4	17517.7
	region	NAF	COO-rs	19.13	12645.9								region	EAF	DEG-rv	7.4	17531.7
	region	EAF	COO-rs	19.13	12645.9								region	WCA	DEG-rv	7.4	17531.7
	region	EAF	COO-rs	19.13	12646.3								region	WCA	DEG-rv	7.4	17564.3
	region	WCA	COO-rs	19.13	12646.3								region	SAF	DEG-rv	7.4	17564.3
	region	WCA	COO-rs	19.13	12651.5								region	SAF	DEG-rv	7.4	17573.7
	region	SAF	COO-rs	19.13	12651.5								region	MEE	DEG-rv	7.4	17573.7
	region	SAF	COO-rs	19.13	12653.9								region	MEE	DEG-rv	7.4	17606.3
	region	CHN	COO-rs	19.13	12653.9								region	CHN	DEG-rv	7.4	17606.3
	region	CHN	COO-rs	19.13	12672								region	CHN	DEG-rv	7.4	17615.7
	region	OEA	COO-rs	19.13	12672								region	IND	DEG-rv	7.4	17615.7
	region	OEA	COO-rs	19.13	12678								region	IND	DEG-rv	7.4	17625
	region	IND	COO-rs	19.13	12678								region	OSA	DEG-rv	7.4	17625
	region	IND	COO-rs	19.13	12678.7								region	OSA	DEG-rv	7.4	17648.3
	region	OSA	COO-rs	19.13	12678.7								region	OCN	DEG-rv	7.4	17648.3
	region	OSA	COO-rs	19.13	12679.2								region	OCN	DEG-rv	7.4	17657.7
	region	OCN	COO-rs	19.13	12679.2								region	PAS	DEG-rv	7.4	17657.7
	region	OCN	COO-rs	19.13	12680.3								region	PAS	DEG-rv	7.4	17667
	region	PAS	COO-rs	19.13	12680.3								region	LAC	DEG-rv	7.4	17667
	region	PAS	COO-rs	19.13	12682.5								region	LAC	DEG-rv	7.4	17695
	region	LAC	COO-rs	19.13	12682.5								region	USA	TIG-rv	7.4898	17695
	region	LAC	COO-rs	19.13	12705.5								region	USA	TIG-rv	7.4898	17890.7
	region	USA	EHO-rv	21.0526	12705.5								region	CAN	TIG-rv	7.4898	17890.7
	region	USA	EHO-rv	21.0526	12721.1								region	CAN	TIG-rv	7.4898	17988.5
	region	CAN	EHO-rv	21.0526	12721.1								region	WEU	TIG-rv	7.4898	17988.5
	region	CAN	EHO-rv	21.0526	12721.1								region	WEU	TIG-rv	7.4898	18014.6
	region	WEU	EHO-rv	21.0526	12721.1								region	EEU	TIG-rv	7.4898	18014.6
	region	WEU	EHO-rv	21.0526	12721.5								region	EEU	TIG-rv	7.4898	18040.7
	region	EEU	EHO-rv	21.0526	12721.5								region	FSU	TIG-rv	7.4898	18040.7
	region	EEU	EHO-rv	21.0526	12721.5								region	FSU	TIG-rv	7.4898	18223.2
	region	FSU	EHO-rv	21.0526	12721.5								region	NAF	TIG-rv	7.4898	18223.2
	region	FSU	EHO-rv	21.0526	12721.7								region	NAF	TIG-rv	7.4898	18275.3
	region	NAF	EHO-rv	21.0526	12721.7								region	EAF	TIG-rv	7.4898	18275.3
	region	NAF	EHO-rv	21.0526	12721.8								region	EAF	TIG-rv	7.4898	18301.4
	region	MEE	EHO-rv	21.0526	12721.8								region	WCA	TIG-rv	7.4898	18301.4
	region	MEE	EHO-rv	21.0526	12721.8								region	WCA	TIG-rv	7.4898	18379.6
	region	CHN	EHO-rv	21.0526	12721.8								region	SAF	TIG-rv	7.4898	18379.6
	region	CHN	EHO-rv	21.0526	12722.7								region	SAF	TIG-rv	7.4898	18399.2
	region	LAC	EHO-rv	21.0526	12722.7								region	MEE	TIG-rv	7.4898	18399.2
	region	LAC	EHO-rv	21.0526	12766.8								region	MEE	TIG-rv	7.4898	18497.1
	region	CAN	TAO-rv	21.0526	12766.8								region	CHN	TIG-rv	7.4898	18497.1
	region	CAN	TAO-rv	21.0526	13036.3								region	CHN	TIG-rv	7.4898	18516.7
	region	WEU	TAO-rv	21.0526	13036.3								region	OEA	TIG-rv	7.4898	18516.7
	region	WEU	TAO-rv	21.0526	13036.8								region	OEA	TIG-rv	7.4898	18536.3
	region	FSU	TAO-rv	21.0526	13036.8								region	IND	TIG-rv	7.4898	18536.3
	region	FSU	TAO-rv	21.0526	13194.7								region	IND	TIG-rv	7.4898	18555.9
	region	EAF	TAO-rv	21.0526	13194.7								region	OSA	TIG-rv	7.4898	18555.9
	region	EAF	TAO-rv	21.0526	13195.2								region	OSA	TIG-rv	7.4898	18595.1
	region	WCA	TAO-rv	21.0526	13195.2								region	OCN	TIG-rv	7.4898	18595.1
	region	WCA	TAO-rv	21.0526	13196								region	OCN	TIG-rv	7.4898	18621.1
	region	SAF	TAO-rv	21.0526	13196								region	PAS	TIG-rv	7.4898	18621.1
	region	SAF	TAO-rv	21.0526	13196.7								region	PAS	TIG-rv	7.4898	18660.3
	region	PAS	TAO-rv	21.0526	13196.7								region	LAC	TIG-rv	7.4898	18660.3
	region	PAS	TAO-rv	21.0526	13197.3								region	LAC	TIG-rv	7.4898	18699.5
	region	USA	SHO-rv	21.0526	13197.3								region	NAF	COG-rv	7.78	18699.5
	region	USA	SHO-rv	21.0526	13518.4								region	NAF	COG-rv	7.78	18706.7
	region	WEU	SHO-rv	21.0526	13518.4								region	EAF	COG-rv	7.78	18706.7
	region	WEU	SHO-rv	21.0526	13520.1								region	EAF	COG-rv	7.78	18706.7
	region	EEU	SHO-rv	21.0526	13520.1								region	USA	COG-rs	7.78	18706.7
	region	EEU	SHO-rv	21.0526	13520.1								region	USA	COG-rs	7.78	18749.7
	region	FSU	SHO-rv	21.0526	13520.1								region	CAN	COG-rs	7.78	18749.7
	region	FSU	SHO-rv	21.0526	13522.3								region	CAN	COG-rs	7.78	18770.7
	region	NAF	SHO-rv	21.0526	13522.3								region	WEU	COG-rs	7.78	18770.7
	region	NAF	SHO-rv	21.0526	13523.5								region	WEU	COG-rs	7.78	18784.4
	region	MEE	SHO-rv	21.0526	13523.5								region	EEU	COG-rs	7.78	18784.4
	region	MEE	SHO-rv	21.0526	13524.8								region	EEU	COG-rs	7.78	18786.2
	region	CHN	SHO-rv	21.0526	13524.8								region	NAF	COG-rs	7.78	18786.2
	region	CHN	SHO-rv	21.0526	13526.3								region	NAF	COG-rs	7.78	18825.6
	region	OCN	SHO-rv	21.0526	13526.3								region	EAF	COG-rs	7.78	18825.6
	region	OCN	SHO-rv	21.0526	13530.8								region	EAF	COG-rs	7.78	18828.2
	region	PAS	SHO-rv	21.0526	13530.8								region	WCA	COG-rs	7.78	18828.2
	region	PAS	SHO-rv	21.0526	13533								region	WCA	COG-rs	7.78	18833
	region	LAC	SHO-rv	21.0526	13533								region	SAF	COG-rs	7.78	18833
	region	LAC	SHO-rv	21.0526	13533.9								region	SAF	COG-rs	7.78	18835.4
	region	USA	EHO-rs	23.6842	13533.9								region	CHN	COG-rs	7.78	18835.4
	region	USA	EHO-rs	23.6842	13588.4								region	CHN	COG-rs	7.78	18848.9
	region	CAN	EHO-rs	23.6842	13588.4								region	OEA	COG-rs	7.78	18848.9
	region	CAN	EHO-rs	23.6842	13691.1								region	OEA	COG-rs	7.78	18851.1
	region	WEU	EHO-rs	23.6842	13691.1								region	IND	COG-rs	7.78	18851.1
	region	WEU	EHO-rs	23.6842	13691.3								region	IND	COG-rs	7.78	18853.7
	region	EEU	EHO-rs	23.6842	13691.3								region	OSA	COG-rs	7.78	18853.7
	region	EEU	EHO-rs	23.6842	13691.3								region	OSA	COG-rs	7.78	18858.8
	region	FSU	EHO-rs	23.6842	13691.3								region	OCN	COG-rs	7.78	18858.8
	region	FSU	EHO-rs	23.6842	13691.5								region	OCN	COG-rs	7.78	18861.7
	region	MEE	EHO-rs	23.6842	13691.5								region	PAS	COG-rs	7.78	18861.7
	region	MEE	EHO-rs	23.6842	13779.5								region	PAS	COG-rs	7.78	18885.7
	region	CHN	EHO-rs	23.6842	13779.5								region	LAC	COG-rs	7.78	18885.7
	region	CHN	EHO-rs	23.6842	13782.3								region	LAC	COG-rs	7.78	18911.8
	region	OEA	EHO-rs	23.6842	13782.3								region	USA	CMG-rv	8.322	18911.8
	region	OEA	EHO-rs	23.6842	13783								region	USA	CMG-rv	8.322	19028.1
	region	IND	EHO-rs	23.6842	13783								region	CAN	CMG-rv	8.322	19028.1
	region	IND	EHO-rs	23.6842	13783.3								region	CAN	CMG-rv	8.322	19060.8
	region	LAC	EHO-rs	23.6842	13783.3								region	WEU	CMG-rv	8.322	19060.8
	region	LAC	EHO-rs	23.6842	13783.4								region	WEU	CMG-rv	8.322	19093.4
	region	USA	TAO-rs	23.6842	13783.4								region	EEU	CMG-rv	8.322	19093.4
	region	USA	TAO-rs	23.6842	13786.4								region	EEU	CMG-rv	8.322	19102.8
	region	CAN	TAO-rs	23.6842	13786.4								region	FSU	CMG-rv	8.322	19102.8
	region	CAN	TAO-rs	23.6842	14197.3								region	FSU	CMG-rv	8.322	19195.9
	region	WEU	TAO-rs	23.6842	14197.3								region	NAF	CMG-rv	8.322	19195.9
	region	WEU	TAO-rs	23.6842	14197.4								region	NAF	CMG-rv	8.322	19214.5
	region	EEU	TAO-rs	23.6842	14197.4								region	EAF	CMG-rv	8.322	19214.5
	region	EEU	TAO-rs	23.6842	14197.4								region	EAF	CMG-rv	8.322	19223.9
	region	FSU	TAO-rs	23.6842	14197.4								region	WCA	CMG-rv	8.322	19223.9
	region	FSU	TAO-rs	23.6842	14318.5								region	WCA	CMG-rv	8.322	19233.3
	region	EAF	TAO-rs	23.6842	14318.5								region	SAF	CMG-rv	8.322	19233.3
	region	EAF	TAO-rs	23.6842	14318.5								region	SAF	CMG-rv	8.322	19242.6
	region	WCA	TAO-rs	23.6842	14318.5								region	MEE	CMG-rv	8.322	19242.6
	region	WCA	TAO-rs	23.6842	14318.7								region	MEE	CMG-rv	8.322	19252
	region	SAF	TAO-rs	23.6842	14318.7								region	CHN	CMG-rv	8.322	19252
	region	SAF	TAO-rs	23.6842	14318.9								region	CHN	CMG-rv	8.322	19321.9
	region	CHN	TAO-rs	23.6842	14318.9								region	IND	CMG-rv	8.322	19321.9
	region	CHN	TAO-rs	23.6842	14318.9								region	IND	CMG-rv	8.322	19354.5
	region	PAS	TAO-rs	23.6842	14318.9								region	OSA	CMG-rv	8.322	19354.5
	region	PAS	TAO-rs	23.6842	14319.1								region	OSA	CMG-rv	8.322	19359.1
	region	LAC	TAO-rs	23.6842	14319.1								region	JPN	CMG-rv	8.322	19359.1
	region	LAC	TAO-rs	23.6842	14539.2								region	JPN	CMG-rv	8.322	19363.8
	region	USA	SHO-rs	23.6842	14539.2								region	OCN	CMG-rv	8.322	19363.8
	region	USA	SHO-rs	23.6842	14690.7								region	OCN	CMG-rv	8.322	19387
	region	CAN	SHO-rs	23.6842	14690.7								region	PAS	CMG-rv	8.322	19387
	region	CAN	SHO-rs	23.6842	14694.4								region	PAS	CMG-rv	8.322	19391.6
	region	WEU	SHO-rs	23.6842	14694.4								region	LAC	CMG-rv	8.322	19391.6
	region	WEU	SHO-rs	23.6842	14698.9								region	LAC	CMG-rv	8.322	19419.6
	region	EEU	SHO-rs	23.6842	14698.9								region	USA	SHG-rv	8.71036	19419.6
	region	EEU	SHO-rs	23.6842	14698.9								region	USA	SHG-rv	8.71036	19503.5
	region	FSU	SHO-rs	23.6842	14698.9								region	CAN	SHG-rv	8.71036	19503.5
	region	FSU	SHO-rs	23.6842	14730.2								region	CAN	SHG-rv	8.71036	19511.8
	region	EAF	SHO-rs	23.6842	14730.2								region	WEU	SHG-rv	8.71036	19511.8
	region	EAF	SHO-rs	23.6842	14730.2								region	WEU	SHG-rv	8.71036	19521.9
	region	WCA	SHO-rs	23.6842	14730.2								region	EEU	SHG-rv	8.71036	19521.9
	region	WCA	SHO-rs	23.6842	14739.8								region	EEU	SHG-rv	8.71036	19532
	region	SAF	SHO-rs	23.6842	14739.8								region	FSU	SHG-rv	8.71036	19532
	region	SAF	SHO-rs	23.6842	14739.8								region	FSU	SHG-rv	8.71036	19632.6
	region	MEE	SHO-rs	23.6842	14739.8								region	NAF	SHG-rv	8.71036	19632.6
	region	MEE	SHO-rs	23.6842	14745.6								region	NAF	SHG-rv	8.71036	19639.3
	region	CHN	SHO-rs	23.6842	14745.6								region	EAF	SHG-rv	8.71036	19639.3
	region	CHN	SHO-rs	23.6842	14746.8								region	EAF	SHG-rv	8.71036	19642.6
	region	OEA	SHO-rs	23.6842	14746.8								region	WCA	SHG-rv	8.71036	19642.6
	region	OEA	SHO-rs	23.6842	14746.8								region	WCA	SHG-rv	8.71036	19656.1
	region	OCN	SHO-rs	23.6842	14746.8								region	SAF	SHG-rv	8.71036	19656.1
	region	OCN	SHO-rs	23.6842	14749.1								region	SAF	SHG-rv	8.71036	19659.4
	region	PAS	SHO-rs	23.6842	14749.1								region	MEE	SHG-rv	8.71036	19659.4
	region	PAS	SHO-rs	23.6842	14750.1								region	MEE	SHG-rv	8.71036	19666.1
	region	LAC	SHO-rs	23.6842	14750.1								region	CHN	SHG-rv	8.71036	19666.1
	region	LAC	SHO-rs	23.6842	14761.9								region	CHN	SHG-rv	8.71036	19669.5
	region	USA	EHO-rs	26.3158	14761.9								region	OEA	SHG-rv	8.71036	19669.5
	region	USA	EHO-rs	26.3158	14834.6								region	OEA	SHG-rv	8.71036	19672.9
	region	CAN	EHO-rs	26.3158	14834.6								region	IND	SHG-rv	8.71036	19672.9
	region	CAN	EHO-rs	26.3158	14875.7								region	IND	SHG-rv	8.71036	19676.3
	region	WEU	EHO-rs	26.3158	14875.7								region	OSA	SHG-rv	8.71036	19676.3
	region	WEU	EHO-rs	26.3158	14876								region	OSA	SHG-rv	8.71036	19686.3
	region	EEU	EHO-rs	26.3158	14876								region	OCN	SHG-rv	8.71036	19686.3
	region	EEU	EHO-rs	26.3158	14876								region	OCN	SHG-rv	8.71036	19693
	region	FSU	EHO-rs	26.3158	14876								region	PAS	SHG-rv	8.71036	19693
	region	FSU	EHO-rs	26.3158	14876.2								region	PAS	SHG-rv	8.71036	19696.4
	region	NAF	EHO-rs	26.3158	14876.2								region	LAC	SHG-rv	8.71036	19696.4
	region	NAF	EHO-rs	26.3158	14876.3								region	LAC	SHG-rv	8.71036	19703.1
	region	MEE	EHO-rs	26.3158	14876.3								region	NAF	COG-rv	8.89	19703.1
	region	MEE	EHO-rs	26.3158	14935								region	NAF	COG-rv	8.89	19710.3
	region	CHN	EHO-rs	26.3158	14935								region	EAF	COG-rv	8.89	19710.3
	region	CHN	EHO-rs	26.3158	14938.2								region	EAF	COG-rv	8.89	19710.3
	region	OEA	EHO-rs	26.3158	14938.2								region	USA	COG-rs	8.89	19710.3
	region	OEA	EHO-rs	26.3158	14939								region	USA	COG-rs	8.89	19753.3
	region	IND	EHO-rs	26.3158	14939								region	CAN	COG-rs	8.89	19753.3
	region	IND	EHO-rs	26.3158	14939.2								region	CAN	COG-rs	8.89	19774.3
	region	LAC	EHO-rs	26.3158	14939.2								region	WEU	COG-rs	8.89	19774.3
	region	LAC	EHO-rs	26.3158	14939.2								region	WEU	COG-rs	8.89	19788
	region	USA	TAO-rs	26.3158	14939.2								region	EEU	COG-rs	8.89	19788
	region	USA	TAO-rs	26.3158	14943.2								region	EEU	COG-rs	8.89	19789.8
	region	CAN	TAO-rs	26.3158	14943.2								region	NAF	COG-rs	8.89	19789.8
	region	CAN	TAO-rs	26.3158	15107.6								region	NAF	COG-rs	8.89	19829.2
	region	WEU	TAO-rs	26.3158	15107.6								region	EAF	COG-rs	8.89	19829.2
	region	WEU	TAO-rs	26.3158	15107.6								region	EAF	COG-rs	8.89	19831.8
	region	EEU	TAO-rs	26.3158	15107.6								region	WCA	COG-rs	8.89	19831.8
	region	EEU	TAO-rs	26.3158	15107.6								region	WCA	COG-rs	8.89	19836.6
	region	FSU	TAO-rs	26.3158	15107.6								region	SAF	COG-rs	8.89	19836.6
	region	FSU	TAO-rs	26.3158	15228.7								region	SAF	COG-rs	8.89	19839
	region	EAF	TAO-rs	26.3158	15228.7								region	CHN	COG-rs	8.89	19839
	region	EAF	TAO-rs	26.3158	15228.8								region	CHN	COG-rs	8.89	19852.5
	region	WCA	TAO-rs	26.3158	15228.8								region	OEA	COG-rs	8.89	19852.5
	region	WCA	TAO-rs	26.3158	15229								region	OEA	COG-rs	8.89	19854.7
	region	SAF	TAO-rs	26.3158	15229								region	IND	COG-rs	8.89	19854.7
	region	SAF	TAO-rs	26.3158	15229.1								region	IND	COG-rs	8.89	19857.3
	region	CHN	TAO-rs	26.3158	15229.1								region	OSA	COG-rs	8.89	19857.3
	region	CHN	TAO-rs	26.3158	15229.2								region	OSA	COG-rs	8.89	19862.4
	region	PAS	TAO-rs	26.3158	15229.2								region	OCN	COG-rs	8.89	19862.4
	region	PAS	TAO-rs	26.3158	15229.3								region	OCN	COG-rs	8.89	19865.3
	region	LAC	TAO-rs	26.3158	15229.3								region	PAS	COG-rs	8.89	19865.3
	region	LAC	TAO-rs	26.3158	15339.3								region	PAS	COG-rs	8.89	19889.3
	region	USA	SHO-rs	26.3158	15339.3								region	LAC	COG-rs	8.89	19889.3
	region	USA	SHO-rs	26.3158	15541.3								region	LAC	COG-rs	8.89	19915.3
	region	CAN	SHO-rs	26.3158	15541.3								region	USA	DEG-rv	9.08	19915.3
	region	CAN	SHO-rs	26.3158	15542.8								region	USA	DEG-rv	9.08	20027.1
	region	WEU	SHO-rs	26.3158	15542.8								region	CAN	DEG-rv	9.08	20027.1
	region	WEU	SHO-rs	26.3158	15549.6								region	CAN	DEG-rv	9.08	20055
	region	EEU	SHO-rs	26.3158	15549.6								region	WEU	DEG-rv	9.08	20055
	region	EEU	SHO-rs	26.3158	15549.6								region	WEU	DEG-rv	9.08	20071.8
	region	FSU	SHO-rs	26.3158	15549.6								region	EEU	DEG-rv	9.08	20071.8
	region	FSU	SHO-rs	26.3158	15580.9								region	EEU	DEG-rv	9.08	20088.6
	region	NAF	SHO-rs	26.3158	15580.9								region	FSU	DEG-rv	9.08	20088.6
	region	NAF	SHO-rs	26.3158	15583.9								region	FSU	DEG-rv	9.08	20256.3
	region	EAF	SHO-rs	26.3158	15583.9								region	NAF	DEG-rv	9.08	20256.3
	region	EAF	SHO-rs	26.3158	15583.9								region	NAF	DEG-rv	9.08	20312.2
	region	WCA	SHO-rs	26.3158	15583.9								region	EAF	DEG-rv	9.08	20312.2
	region	WCA	SHO-rs	26.3158	15593.5								region	EAF	DEG-rv	9.08	20329
	region	SAF	SHO-rs	26.3158	15593.5								region	WCA	DEG-rv	9.08	20329
	region	SAF	SHO-rs	26.3158	15593.5								region	WCA	DEG-rv	9.08	20368.2
	region	MEE	SHO-rs	26.3158	15593.5								region	SAF	DEG-rv	9.08	20368.2
	region	MEE	SHO-rs	26.3158	15597.4								region	SAF	DEG-rv	9.08	20379.4
	region	CHN	SHO-rs	26.3158	15597.4								region	MEE	DEG-rv	9.08	20379.4
	region	CHN	SHO-rs	26.3158	15598.7								region	MEE	DEG-rv	9.08	20418.6
	region	OEA	SHO-rs	26.3158	15598.7								region	CHN	DEG-rv	9.08	20418.6
	region	OEA	SHO-rs	26.3158	15598.7								region	CHN	DEG-rv	9.08	20429.8
	region	OCN	SHO-rs	26.3158	15598.7								region	IND	DEG-rv	9.08	20429.8
	region	OCN	SHO-rs	26.3158	15601								region	IND	DEG-rv	9.08	20441.1
	region	PAS	SHO-rs	26.3158	15601								region	OSA	DEG-rv	9.08	20441.1
	region	PAS	SHO-rs	26.3158	15601.6								region	OSA	DEG-rv	9.08	20469
	region	LAC	SHO-rs	26.3158	15601.6								region	OCN	DEG-rv	9.08	20469
	region	LAC	SHO-rs	26.3158	15607.5								region	OCN	DEG-rv	9.08	20480.2
	region	USA	EHO-rs	30.2632	15607.5								region	PAS	DEG-rv	9.08	20480.2
	region	USA	EHO-rs	30.2632	15680.3								region	PAS	DEG-rv	9.08	20491.5
	region	CAN	EHO-rs	30.2632	15680.3								region	LAC	DEG-rv	9.08	20491.5
	region	CAN	EHO-rs	30.2632	15721.3								region	LAC	DEG-rv	9.08	20525.1
	region	WEU	EHO-rs	30.2632	15721.3								region	USA	COG-rs	10	20525.1
	region	WEU	EHO-rs	30.2632	15721.6								region	USA	COG-rs	10	20542.3
	region	EEU	EHO-rs	30.2632	15721.6								region	CAN	COG-rs	10	20542.3
	region	EEU	EHO-rs	30.2632	15721.6								region	CAN	COG-rs	10	20563.3
	region	FSU	EHO-rs	30.2632	15721.6								region	WEU	COG-rs	10	20563.3
	region	FSU	EHO-rs	30.2632	15721.8								region	WEU	COG-rs	10	20577
	region	NAF	EHO-rs	30.2632	15721.8								region	EEU	COG-rs	10	20577
	region	NAF	EHO-rs	30.2632	15722								region	EEU	COG-rs	10	20578.7
	region	MEE	EHO-rs	30.2632	15722								region	NAF	COG-rs	10	20578.7
	region	MEE	EHO-rs	30.2632	15780.7								region	NAF	COG-rs	10	20596.1
	region	CHN	EHO-rs	30.2632	15780.7								region	EAF	COG-rs	10	20596.1
	region	CHN	EHO-rs	30.2632	15784								region	EAF	COG-rs	10	20597.2
	region	OEA	EHO-rs	30.2632	15784								region	SAF	COG-rs	10	20597.2
	region	OEA	EHO-rs	30.2632	15785								region	SAF	COG-rs	10	20598
	region	IND	EHO-rs	30.2632	15785								region	CHN	COG-rs	10	20598
	region	IND	EHO-rs	30.2632	15785.3								region	CHN	COG-rs	10	20611.6
	region	LAC	EHO-rs	30.2632	15785.3								region	OEA	COG-rs	10	20611.6
	region	LAC	EHO-rs	30.2632	15785.3								region	OEA	COG-rs	10	20613.8
	region	USA	TAO-rs	30.2632	15785.3								region	IND	COG-rs	10	20613.8
	region	USA	TAO-rs	30.2632	15789.3								region	IND	COG-rs	10	20615.3
	region	CAN	TAO-rs	30.2632	15789.3								region	OSA	COG-rs	10	20615.3
	region	CAN	TAO-rs	30.2632	15953.6								region	OSA	COG-rs	10	20617.4
	region	WEU	TAO-rs	30.2632	15953.6								region	PAS	COG-rs	10	20617.4
	region	WEU	TAO-rs	30.2632	15953.7								region	PAS	COG-rs	10	20622.2
	region	EEU	TAO-rs	30.2632	15953.7								region	LAC	COG-rs	10	20622.2
	region	EEU	TAO-rs	30.2632	15953.7								region	LAC	COG-rs	10	20637.8
	region	FSU	TAO-rs	30.2632	15953.7								region	USA	COG-rs	10.98	20637.8
	region	FSU	TAO-rs	30.2632	16074.8								region	USA	COG-rs	10.98	20655
	region	EAF	TAO-rs	30.2632	16074.8								region	CAN	COG-rs	10.98	20655
	region	EAF	TAO-rs	30.2632	16074.9								region	CAN	COG-rs	10.98	20676
	region	WCA	TAO-rs	30.2632	16074.9								region	WEU	COG-rs	10.98	20676
	region	WCA	TAO-rs	30.2632	16075.1								region	WEU	COG-rs	10.98	20689.7
	region	SAF	TAO-rs	30.2632	16075.1								region	EEU	COG-rs	10.98	20689.7
	region	SAF	TAO-rs	30.2632	16075.2								region	EEU	COG-rs	10.98	20691.4
	region	CHN	TAO-rs	30.2632	16075.2								region	NAF	COG-rs	10.98	20691.4
	region	CHN	TAO-rs	30.2632	16075.3								region	NAF	COG-rs	10.98	20708.7
	region	PAS	TAO-rs	30.2632	16075.3								region	EAF	COG-rs	10.98	20708.7
	region	PAS	TAO-rs	30.2632	16075.4								region	EAF	COG-rs	10.98	20709.9
	region	LAC	TAO-rs	30.2632	16075.4								region	SAF	COG-rs	10.98	20709.9
	region	LAC	TAO-rs	30.2632	16185.4								region	SAF	COG-rs	10.98	20710.7
	region	USA	SHO-rs	30.2632	16185.4								region	CHN	COG-rs	10.98	20710.7
	region	USA	SHO-rs	30.2632	16387.5								region	CHN	COG-rs	10.98	20724.3
	region	CAN	SHO-rs	30.2632	16387.5								region	OEA	COG-rs	10.98	20724.3
	region	CAN	SHO-rs	30.2632	16388.9								region	OEA	COG-rs	10.98	20726.5
	region	WEU	SHO-rs	30.2632	16388.9								region	IND	COG-rs	10.98	20726.5
	region	WEU	SHO-rs	30.2632	16395.7								region	IND	COG-rs	10.98	20728
	region	EEU	SHO-rs	30.2632	16395.7								region	OSA	COG-rs	10.98	20728
	region	EEU	SHO-rs	30.2632	16395.8								region	OSA	COG-rs	10.98	20730
	region	FSU	SHO-rs	30.2632	16395.8								region	PAS	COG-rs	10.98	20730
	region	FSU	SHO-rs	30.2632	16427								region	PAS	COG-rs	10.98	20734.9
	region	NAF	SHO-rs	30.2632	16427								region	LAC	COG-rs	10.98	20734.9
	region	NAF	SHO-rs	30.2632	16433								region	LAC	COG-rs	10.98	20750.5
	region	EAF	SHO-rs	30.2632	16433								region	USA	DEG-rv	11.096	20750.5
	region	EAF	SHO-rs	30.2632	16433								region	USA	DEG-rv	11.096	20843.6
	region	WCA	SHO-rs	30.2632	16433								region	CAN	DEG-rv	11.096	20843.6
	region	WCA	SHO-rs	30.2632	16442.6								region	CAN	DEG-rv	11.096	20866.8
	region	SAF	SHO-rs	30.2632	16442.6								region	WEU	DEG-rv	11.096	20866.8
	region	SAF	SHO-rs	30.2632	16442.6								region	WEU	DEG-rv	11.096	20880.8
	region	MEE	SHO-rs	30.2632	16442.6								region	EEU	DEG-rv	11.096	20880.8
	region	MEE	SHO-rs	30.2632	16446.5								region	EEU	DEG-rv	11.096	20894.8
	region	CHN	SHO-rs	30.2632	16446.5								region	FSU	DEG-rv	11.096	20894.8
	region	CHN	SHO-rs	30.2632	16447.9								region	FSU	DEG-rv	11.096	21034.6
	region	OEA	SHO-rs	30.2632	16447.9								region	NAF	DEG-rv	11.096	21034.6
	region	OEA	SHO-rs	30.2632	16447.9								region	NAF	DEG-rv	11.096	21081.2
	region	OCN	SHO-rs	30.2632	16447.9								region	EAF	DEG-rv	11.096	21081.2
	region	OCN	SHO-rs	30.2632	16450.9								region	EAF	DEG-rv	11.096	21095.2
	region	PAS	SHO-rs	30.2632	16450.9								region	WCA	DEG-rv	11.096	21095.2
	region	PAS	SHO-rs	30.2632	16451.7								region	WCA	DEG-rv	11.096	21127.8
	region	LAC	SHO-rs	30.2632	16451.7								region	SAF	DEG-rv	11.096	21127.8
	region	LAC	SHO-rs	30.2632	16457.7								region	SAF	DEG-rv	11.096	21137.2
	region	USA	EHO-rs	36.1842	16457.7								region	MEE	DEG-rv	11.096	21137.2
	region	USA	EHO-rs	36.1842	16621.3								region	MEE	DEG-rv	11.096	21169.8
	region	CAN	EHO-rs	36.1842	16621.3								region	CHN	DEG-rv	11.096	21169.8
	region	CAN	EHO-rs	36.1842	16641.8								region	CHN	DEG-rv	11.096	21179.2
	region	WEU	EHO-rs	36.1842	16641.8								region	IND	DEG-rv	11.096	21179.2
	region	WEU	EHO-rs	36.1842	16643								region	IND	DEG-rv	11.096	21188.6
	region	EEU	EHO-rs	36.1842	16643								region	OSA	DEG-rv	11.096	21188.6
	region	EEU	EHO-rs	36.1842	16643								region	OSA	DEG-rv	11.096	21211.8
	region	FSU	EHO-rs	36.1842	16643								region	OCN	DEG-rv	11.096	21211.8
	region	FSU	EHO-rs	36.1842	16643.3								region	OCN	DEG-rv	11.096	21221.2
	region	NAF	EHO-rs	36.1842	16643.3								region	PAS	DEG-rv	11.096	21221.2
	region	NAF	EHO-rs	36.1842	16644.2								region	PAS	DEG-rv	11.096	21230.6
	region	MEE	EHO-rs	36.1842	16644.2								region	LAC	DEG-rv	11.096	21230.6
	region	MEE	EHO-rs	36.1842	16732.3								region	LAC	DEG-rv	11.096	21258.6
	region	CHN	EHO-rs	36.1842	16732.3								region	USA	CMG-rs	11.8258	21258.6
	region	CHN	EHO-rs	36.1842	16741.6								region	USA	CMG-rs	11.8258	21277.5
	region	OEA	EHO-rs	36.1842	16741.6								region	CAN	CMG-rs	11.8258	21277.5
	region	OEA	EHO-rs	36.1842	16744								region	CAN	CMG-rs	11.8258	21283.7
	region	IND	EHO-rs	36.1842	16744								region	WEU	CMG-rs	11.8258	21283.7
	region	IND	EHO-rs	36.1842	16744.6								region	WEU	CMG-rs	11.8258	21290
	region	LAC	EHO-rs	36.1842	16744.6								region	EEU	CMG-rs	11.8258	21290
	region	LAC	EHO-rs	36.1842	16744.8								region	EEU	CMG-rs	11.8258	21292.1
	region	USA	TAO-rs	36.1842	16744.8								region	FSU	CMG-rs	11.8258	21292.1
	region	USA	TAO-rs	36.1842	16753.7								region	FSU	CMG-rs	11.8258	21313.1
	region	CAN	TAO-rs	36.1842	16753.7								region	NAF	CMG-rs	11.8258	21313.1
	region	CAN	TAO-rs	36.1842	16835.9								region	NAF	CMG-rs	11.8258	21317.3
	region	WEU	TAO-rs	36.1842	16835.9								region	EAF	CMG-rs	11.8258	21317.3
	region	WEU	TAO-rs	36.1842	16836.1								region	EAF	CMG-rs	11.8258	21319.4
	region	EEU	TAO-rs	36.1842	16836.1								region	WCA	CMG-rs	11.8258	21319.4
	region	EEU	TAO-rs	36.1842	16836.2								region	WCA	CMG-rs	11.8258	21321.5
	region	FSU	TAO-rs	36.1842	16836.2								region	SAF	CMG-rs	11.8258	21321.5
	region	FSU	TAO-rs	36.1842	17078.3								region	SAF	CMG-rs	11.8258	21323.6
	region	EAF	TAO-rs	36.1842	17078.3								region	MEE	CMG-rs	11.8258	21323.6
	region	EAF	TAO-rs	36.1842	17078.5								region	MEE	CMG-rs	11.8258	21325.6
	region	WCA	TAO-rs	36.1842	17078.5								region	CHN	CMG-rs	11.8258	21325.6
	region	WCA	TAO-rs	36.1842	17078.9								region	CHN	CMG-rs	11.8258	21342.4
	region	SAF	TAO-rs	36.1842	17078.9								region	OEA	CMG-rs	11.8258	21342.4
	region	SAF	TAO-rs	36.1842	17079.2								region	OEA	CMG-rs	11.8258	21342.8
	region	CHN	TAO-rs	36.1842	17079.2								region	IND	CMG-rs	11.8258	21342.8
	region	CHN	TAO-rs	36.1842	17079.4								region	IND	CMG-rs	11.8258	21349.1
	region	PAS	TAO-rs	36.1842	17079.4								region	OSA	CMG-rs	11.8258	21349.1
	region	PAS	TAO-rs	36.1842	17079.7								region	OSA	CMG-rs	11.8258	21350.4
	region	LAC	TAO-rs	36.1842	17079.7								region	JPN	CMG-rs	11.8258	21350.4
	region	LAC	TAO-rs	36.1842	17373.1								region	JPN	CMG-rs	11.8258	21351.6
	region	USA	SHO-rs	36.1842	17373.1								region	OCN	CMG-rs	11.8258	21351.6
	region	USA	SHO-rs	36.1842	17827.6								region	OCN	CMG-rs	11.8258	21355.8
	region	CAN	SHO-rs	36.1842	17827.6								region	PAS	CMG-rs	11.8258	21355.8
	region	CAN	SHO-rs	36.1842	17828.4								region	PAS	CMG-rs	11.8258	21357.1
	region	WEU	SHO-rs	36.1842	17828.4								region	LAC	CMG-rs	11.8258	21357.1
	region	WEU	SHO-rs	36.1842	17855.5								region	LAC	CMG-rs	11.8258	21363.4
	region	EEU	SHO-rs	36.1842	17855.5								region	USA	COG-rs	11.96	21363.4
	region	EEU	SHO-rs	36.1842	17855.7								region	USA	COG-rs	11.96	21380.6
	region	FSU	SHO-rs	36.1842	17855.7								region	CAN	COG-rs	11.96	21380.6
	region	FSU	SHO-rs	36.1842	17918.2								region	CAN	COG-rs	11.96	21401.6
	region	NAF	SHO-rs	36.1842	17918.2								region	WEU	COG-rs	11.96	21401.6
	region	NAF	SHO-rs	36.1842	17939.3								region	WEU	COG-rs	11.96	21415.3
	region	EAF	SHO-rs	36.1842	17939.3								region	EEU	COG-rs	11.96	21415.3
	region	EAF	SHO-rs	36.1842	17939.3								region	EEU	COG-rs	11.96	21417
	region	WCA	SHO-rs	36.1842	17939.3								region	NAF	COG-rs	11.96	21417
	region	WCA	SHO-rs	36.1842	17958.4								region	NAF	COG-rs	11.96	21434.3
	region	SAF	SHO-rs	36.1842	17958.4								region	EAF	COG-rs	11.96	21434.3
	region	SAF	SHO-rs	36.1842	17958.5								region	EAF	COG-rs	11.96	21435.5
	region	MEE	SHO-rs	36.1842	17958.5								region	SAF	COG-rs	11.96	21435.5
	region	MEE	SHO-rs	36.1842	17964.3								region	SAF	COG-rs	11.96	21436.3
	region	CHN	SHO-rs	36.1842	17964.3								region	CHN	COG-rs	11.96	21436.3
	region	CHN	SHO-rs	36.1842	17968.1								region	CHN	COG-rs	11.96	21449.9
	region	OEA	SHO-rs	36.1842	17968.1								region	OEA	COG-rs	11.96	21449.9
	region	OEA	SHO-rs	36.1842	17968.2								region	OEA	COG-rs	11.96	21452.1
	region	OCN	SHO-rs	36.1842	17968.2								region	IND	COG-rs	11.96	21452.1
	region	OCN	SHO-rs	36.1842	17975.8								region	IND	COG-rs	11.96	21453.6
	region	PAS	SHO-rs	36.1842	17975.8								region	OSA	COG-rs	11.96	21453.6
	region	PAS	SHO-rs	36.1842	17977.4								region	OSA	COG-rs	11.96	21455.7
	region	LAC	SHO-rs	36.1842	17977.4								region	PAS	COG-rs	11.96	21455.7
	region	LAC	SHO-rs	36.1842	17993.2								region	PAS	COG-rs	11.96	21460.5
	region	USA	EHO-rs	44.0789	17993.2								region	LAC	COG-rs	11.96	21460.5
	region	USA	EHO-rs	44.0789	18075								region	LAC	COG-rs	11.96	21476.1
	region	CAN	EHO-rs	44.0789	18075								region	USA	COG-rs	12.94	21476.1
	region	CAN	EHO-rs	44.0789	18229								region	USA	COG-rs	12.94	21493.2
	region	WEU	EHO-rs	44.0789	18229								region	CAN	COG-rs	12.94	21493.2
	region	WEU	EHO-rs	44.0789	18229.3								region	CAN	COG-rs	12.94	21514.3
	region	EEU	EHO-rs	44.0789	18229.3								region	WEU	COG-rs	12.94	21514.3
	region	EEU	EHO-rs	44.0789	18229.3								region	WEU	COG-rs	12.94	21528
	region	FSU	EHO-rs	44.0789	18229.3								region	EEU	COG-rs	12.94	21528
	region	FSU	EHO-rs	44.0789	18229.5								region	EEU	COG-rs	12.94	21529.7
	region	MEE	EHO-rs	44.0789	18229.5								region	NAF	COG-rs	12.94	21529.7
	region	MEE	EHO-rs	44.0789	18361.6								region	NAF	COG-rs	12.94	21547
	region	CHN	EHO-rs	44.0789	18361.6								region	EAF	COG-rs	12.94	21547
	region	CHN	EHO-rs	44.0789	18365.8								region	EAF	COG-rs	12.94	21548.2
	region	OEA	EHO-rs	44.0789	18365.8								region	SAF	COG-rs	12.94	21548.2
	region	OEA	EHO-rs	44.0789	18366.9								region	SAF	COG-rs	12.94	21549
	region	IND	EHO-rs	44.0789	18366.9								region	CHN	COG-rs	12.94	21549
	region	IND	EHO-rs	44.0789	18367.3								region	CHN	COG-rs	12.94	21562.5
	region	LAC	EHO-rs	44.0789	18367.3								region	OEA	COG-rs	12.94	21562.5
	region	LAC	EHO-rs	44.0789	18367.5								region	OEA	COG-rs	12.94	21564.7
	region	USA	TAO-rs	44.0789	18367.5								region	IND	COG-rs	12.94	21564.7
	region	USA	TAO-rs	44.0789	18371.9								region	IND	COG-rs	12.94	21566.3
	region	CAN	TAO-rs	44.0789	18371.9								region	OSA	COG-rs	12.94	21566.3
	region	CAN	TAO-rs	44.0789	18988.3								region	OSA	COG-rs	12.94	21568.3
	region	WEU	TAO-rs	44.0789	18988.3								region	PAS	COG-rs	12.94	21568.3
	region	WEU	TAO-rs	44.0789	18988.4								region	PAS	COG-rs	12.94	21573.1
	region	EEU	TAO-rs	44.0789	18988.4								region	LAC	COG-rs	12.94	21573.1
	region	EEU	TAO-rs	44.0789	18988.4								region	LAC	COG-rs	12.94	21588.7
	region	FSU	TAO-rs	44.0789	18988.4								region	USA	TIG-rs	13.5152	21588.7
	region	FSU	TAO-rs	44.0789	19170								region	USA	TIG-rs	13.5152	21620.6
	region	EAF	TAO-rs	44.0789	19170								region	CAN	TIG-rs	13.5152	21620.6
	region	EAF	TAO-rs	44.0789	19170.1								region	CAN	TIG-rs	13.5152	21639.1
	region	WCA	TAO-rs	44.0789	19170.1								region	WEU	TIG-rs	13.5152	21639.1
	region	WCA	TAO-rs	44.0789	19170.4								region	WEU	TIG-rs	13.5152	21643.2
	region	SAF	TAO-rs	44.0789	19170.4								region	EEU	TIG-rs	13.5152	21643.2
	region	SAF	TAO-rs	44.0789	19170.7								region	EEU	TIG-rs	13.5152	21647.4
	region	CHN	TAO-rs	44.0789	19170.7								region	FSU	TIG-rs	13.5152	21647.4
	region	CHN	TAO-rs	44.0789	19170.7								region	FSU	TIG-rs	13.5152	21676.8
	region	PAS	TAO-rs	44.0789	19170.7								region	NAF	TIG-rs	13.5152	21676.8
	region	PAS	TAO-rs	44.0789	19171								region	NAF	TIG-rs	13.5152	21685.2
	region	LAC	TAO-rs	44.0789	19171								region	EAF	TIG-rs	13.5152	21685.2
	region	LAC	TAO-rs	44.0789	19501.1								region	EAF	TIG-rs	13.5152	21689.3
	region	USA	SHO-rs	44.0789	19501.1								region	WCA	TIG-rs	13.5152	21689.3
	region	USA	SHO-rs	44.0789	19728.4								region	WCA	TIG-rs	13.5152	21701.9
	region	CAN	SHO-rs	44.0789	19728.4								region	SAF	TIG-rs	13.5152	21701.9
	region	CAN	SHO-rs	44.0789	19733.9								region	SAF	TIG-rs	13.5152	21706.1
	region	WEU	SHO-rs	44.0789	19733.9								region	MEE	TIG-rs	13.5152	21706.1
	region	WEU	SHO-rs	44.0789	19740.7								region	MEE	TIG-rs	13.5152	21722.9
	region	EEU	SHO-rs	44.0789	19740.7								region	CHN	TIG-rs	13.5152	21722.9
	region	EEU	SHO-rs	44.0789	19740.7								region	CHN	TIG-rs	13.5152	21727.1
	region	FSU	SHO-rs	44.0789	19740.7								region	OEA	TIG-rs	13.5152	21727.1
	region	FSU	SHO-rs	44.0789	19787.6								region	OEA	TIG-rs	13.5152	21731.2
	region	EAF	SHO-rs	44.0789	19787.6								region	IND	TIG-rs	13.5152	21731.2
	region	EAF	SHO-rs	44.0789	19787.6								region	IND	TIG-rs	13.5152	21735.4
	region	WCA	SHO-rs	44.0789	19787.6								region	OSA	TIG-rs	13.5152	21735.4
	region	WCA	SHO-rs	44.0789	19802								region	OSA	TIG-rs	13.5152	21743.8
	region	SAF	SHO-rs	44.0789	19802								region	OCN	TIG-rs	13.5152	21743.8
	region	SAF	SHO-rs	44.0789	19802								region	OCN	TIG-rs	13.5152	21748
	region	MEE	SHO-rs	44.0789	19802								region	PAS	TIG-rs	13.5152	21748
	region	MEE	SHO-rs	44.0789	19810.7								region	PAS	TIG-rs	13.5152	21756.4
	region	CHN	SHO-rs	44.0789	19810.7								region	LAC	TIG-rs	13.5152	21756.4
	region	CHN	SHO-rs	44.0789	19812.5								region	LAC	TIG-rs	13.5152	21769
	region	OEA	SHO-rs	44.0789	19812.5								region	USA	SHG-rs	13.9882	21769
	region	OEA	SHO-rs	44.0789	19812.5								region	USA	SHG-rs	13.9882	21787.4
	region	OCN	SHO-rs	44.0789	19812.5								region	CAN	SHG-rs	13.9882	21787.4
	region	OCN	SHO-rs	44.0789	19815.9								region	CAN	SHG-rs	13.9882	21792.4
	region	PAS	SHO-rs	44.0789	19815.9								region	WEU	SHG-rs	13.9882	21792.4
	region	PAS	SHO-rs	44.0789	19817.4								region	WEU	SHG-rs	13.9882	21800.7
	region	LAC	SHO-rs	44.0789	19817.4								region	EEU	SHG-rs	13.9882	21800.7
	region	LAC	SHO-rs	44.0789	19835.2								region	EEU	SHG-rs	13.9882	21803.2
	region	USA	EHO-rs	53.9474	19835.2								region	FSU	SHG-rs	13.9882	21803.2
	region	USA	EHO-rs	53.9474	19944.3								region	FSU	SHG-rs	13.9882	21827.5
	region	CAN	EHO-rs	53.9474	19944.3								region	NAF	SHG-rs	13.9882	21827.5
	region	CAN	EHO-rs	53.9474	20005.8								region	NAF	SHG-rs	13.9882	21837.2
	region	WEU	EHO-rs	53.9474	20005.8								region	EAF	SHG-rs	13.9882	21837.2
	region	WEU	EHO-rs	53.9474	20006.3								region	EAF	SHG-rs	13.9882	21838
	region	EEU	EHO-rs	53.9474	20006.3								region	WCA	SHG-rs	13.9882	21838
	region	EEU	EHO-rs	53.9474	20006.3								region	WCA	SHG-rs	13.9882	21841.4
	region	FSU	EHO-rs	53.9474	20006.3								region	SAF	SHG-rs	13.9882	21841.4
	region	FSU	EHO-rs	53.9474	20006.6								region	SAF	SHG-rs	13.9882	21851.2
	region	NAF	EHO-rs	53.9474	20006.6								region	MEE	SHG-rs	13.9882	21851.2
	region	NAF	EHO-rs	53.9474	20006.7								region	MEE	SHG-rs	13.9882	21852.9
	region	MEE	EHO-rs	53.9474	20006.7								region	CHN	SHG-rs	13.9882	21852.9
	region	MEE	EHO-rs	53.9474	20094.8								region	CHN	SHG-rs	13.9882	21881.5
	region	CHN	EHO-rs	53.9474	20094.8								region	OEA	SHG-rs	13.9882	21881.5
	region	CHN	EHO-rs	53.9474	20099.7								region	OEA	SHG-rs	13.9882	21882.3
	region	OEA	EHO-rs	53.9474	20099.7								region	IND	SHG-rs	13.9882	21882.3
	region	OEA	EHO-rs	53.9474	20100.8								region	IND	SHG-rs	13.9882	21883.1
	region	IND	EHO-rs	53.9474	20100.8								region	OSA	SHG-rs	13.9882	21883.1
	region	IND	EHO-rs	53.9474	20101.1								region	OSA	SHG-rs	13.9882	21885.7
	region	LAC	EHO-rs	53.9474	20101.1								region	OCN	SHG-rs	13.9882	21885.7
	region	LAC	EHO-rs	53.9474	20101.2								region	OCN	SHG-rs	13.9882	21891.7
	region	USA	TAO-rs	53.9474	20101.2								region	PAS	SHG-rs	13.9882	21891.7
	region	USA	TAO-rs	53.9474	20107.1								region	PAS	SHG-rs	13.9882	21892.5
	region	CAN	TAO-rs	53.9474	20107.1								region	LAC	SHG-rs	13.9882	21892.5
	region	CAN	TAO-rs	53.9474	20353.7								region	LAC	SHG-rs	13.9882	21934.4
	region	WEU	TAO-rs	53.9474	20353.7								region	USA	CMG-rs	14.2601	21934.4
	region	WEU	TAO-rs	53.9474	20353.7								region	USA	CMG-rs	14.2601	21953.3
	region	EEU	TAO-rs	53.9474	20353.7								region	CAN	CMG-rs	14.2601	21953.3
	region	EEU	TAO-rs	53.9474	20353.8								region	CAN	CMG-rs	14.2601	21959.6
	region	FSU	TAO-rs	53.9474	20353.8								region	WEU	CMG-rs	14.2601	21959.6
	region	FSU	TAO-rs	53.9474	20535.4								region	WEU	CMG-rs	14.2601	21965.9
	region	EAF	TAO-rs	53.9474	20535.4								region	EEU	CMG-rs	14.2601	21965.9
	region	EAF	TAO-rs	53.9474	20535.5								region	EEU	CMG-rs	14.2601	21968
	region	WCA	TAO-rs	53.9474	20535.5								region	FSU	CMG-rs	14.2601	21968
	region	WCA	TAO-rs	53.9474	20535.8								region	FSU	CMG-rs	14.2601	21988.9
	region	SAF	TAO-rs	53.9474	20535.8								region	NAF	CMG-rs	14.2601	21988.9
	region	SAF	TAO-rs	53.9474	20536								region	NAF	CMG-rs	14.2601	21993.1
	region	CHN	TAO-rs	53.9474	20536								region	EAF	CMG-rs	14.2601	21993.1
	region	CHN	TAO-rs	53.9474	20536.1								region	EAF	CMG-rs	14.2601	21995.2
	region	PAS	TAO-rs	53.9474	20536.1								region	WCA	CMG-rs	14.2601	21995.2
	region	PAS	TAO-rs	53.9474	20536.3								region	WCA	CMG-rs	14.2601	21997.3
	region	LAC	TAO-rs	53.9474	20536.3								region	SAF	CMG-rs	14.2601	21997.3
	region	LAC	TAO-rs	53.9474	20701.3								region	SAF	CMG-rs	14.2601	21999.4
	region	USA	SHO-rs	53.9474	20701.3								region	MEE	CMG-rs	14.2601	21999.4
	region	USA	SHO-rs	53.9474	21004.3								region	MEE	CMG-rs	14.2601	22001.5
	region	CAN	SHO-rs	53.9474	21004.3								region	CHN	CMG-rs	14.2601	22001.5
	region	CAN	SHO-rs	53.9474	21006.5								region	CHN	CMG-rs	14.2601	22018.3
	region	WEU	SHO-rs	53.9474	21006.5								region	OEA	CMG-rs	14.2601	22018.3
	region	WEU	SHO-rs	53.9474	21016.7								region	OEA	CMG-rs	14.2601	22018.7
	region	EEU	SHO-rs	53.9474	21016.7								region	IND	CMG-rs	14.2601	22018.7
	region	EEU	SHO-rs	53.9474	21016.8								region	IND	CMG-rs	14.2601	22025
	region	FSU	SHO-rs	53.9474	21016.8								region	OSA	CMG-rs	14.2601	22025
	region	FSU	SHO-rs	53.9474	21063.6								region	OSA	CMG-rs	14.2601	22026.2
	region	NAF	SHO-rs	53.9474	21063.6								region	JPN	CMG-rs	14.2601	22026.2
	region	NAF	SHO-rs	53.9474	21068.2								region	JPN	CMG-rs	14.2601	22027.5
	region	EAF	SHO-rs	53.9474	21068.2								region	OCN	CMG-rs	14.2601	22027.5
	region	EAF	SHO-rs	53.9474	21068.2								region	OCN	CMG-rs	14.2601	22031.7
	region	WCA	SHO-rs	53.9474	21068.2								region	PAS	CMG-rs	14.2601	22031.7
	region	WCA	SHO-rs	53.9474	21082.5								region	PAS	CMG-rs	14.2601	22032.9
	region	SAF	SHO-rs	53.9474	21082.5								region	LAC	CMG-rs	14.2601	22032.9
	region	SAF	SHO-rs	53.9474	21082.6								region	LAC	CMG-rs	14.2601	22039.2
	region	MEE	SHO-rs	53.9474	21082.6								region	USA	TIG-rs	16.2973	22039.2
	region	MEE	SHO-rs	53.9474	21088.4								region	USA	TIG-rs	16.2973	22071.1
	region	CHN	SHO-rs	53.9474	21088.4								region	CAN	TIG-rs	16.2973	22071.1
	region	CHN	SHO-rs	53.9474	21090.4								region	CAN	TIG-rs	16.2973	22089.5
	region	OEA	SHO-rs	53.9474	21090.4								region	WEU	TIG-rs	16.2973	22089.5
	region	OEA	SHO-rs	53.9474	21090.4								region	WEU	TIG-rs	16.2973	22093.7
	region	OCN	SHO-rs	53.9474	21090.4								region	EEU	TIG-rs	16.2973	22093.7
	region	OCN	SHO-rs	53.9474	21093.8								region	EEU	TIG-rs	16.2973	22097.9
	region	PAS	SHO-rs	53.9474	21093.8								region	FSU	TIG-rs	16.2973	22097.9
	region	PAS	SHO-rs	53.9474	21094.7								region	FSU	TIG-rs	16.2973	22127.2
	region	LAC	SHO-rs	53.9474	21094.7								region	NAF	TIG-rs	16.2973	22127.2
	region	LAC	SHO-rs	53.9474	21103.6								region	NAF	TIG-rs	16.2973	22135.6
	region	USA	EHO-rs	65.7895	21103.6								region	EAF	TIG-rs	16.2973	22135.6
	region	USA	EHO-rs	65.7895	21212.7								region	EAF	TIG-rs	16.2973	22139.8
	region	CAN	EHO-rs	65.7895	21212.7								region	WCA	TIG-rs	16.2973	22139.8
	region	CAN	EHO-rs	65.7895	21274.3								region	WCA	TIG-rs	16.2973	22152.4
	region	WEU	EHO-rs	65.7895	21274.3								region	SAF	TIG-rs	16.2973	22152.4
	region	WEU	EHO-rs	65.7895	21274.7								region	SAF	TIG-rs	16.2973	22156.6
	region	EEU	EHO-rs	65.7895	21274.7								region	MEE	TIG-rs	16.2973	22156.6
	region	EEU	EHO-rs	65.7895	21274.7								region	MEE	TIG-rs	16.2973	22173.3
	region	FSU	EHO-rs	65.7895	21274.7								region	CHN	TIG-rs	16.2973	22173.3
	region	FSU	EHO-rs	65.7895	21275								region	CHN	TIG-rs	16.2973	22177.5
	region	NAF	EHO-rs	65.7895	21275								region	OEA	TIG-rs	16.2973	22177.5
	region	NAF	EHO-rs	65.7895	21275.4								region	OEA	TIG-rs	16.2973	22181.7
	region	MEE	EHO-rs	65.7895	21275.4								region	IND	TIG-rs	16.2973	22181.7
	region	MEE	EHO-rs	65.7895	21363.4								region	IND	TIG-rs	16.2973	22185.9
	region	CHN	EHO-rs	65.7895	21363.4								region	OSA	TIG-rs	16.2973	22185.9
	region	CHN	EHO-rs	65.7895	21368.3								region	OSA	TIG-rs	16.2973	22194.3
	region	OEA	EHO-rs	65.7895	21368.3								region	OCN	TIG-rs	16.2973	22194.3
	region	OEA	EHO-rs	65.7895	21369.8								region	OCN	TIG-rs	16.2973	22198.5
	region	IND	EHO-rs	65.7895	21369.8								region	PAS	TIG-rs	16.2973	22198.5
	region	IND	EHO-rs	65.7895	21370.2								region	PAS	TIG-rs	16.2973	22206.9
	region	LAC	EHO-rs	65.7895	21370.2								region	LAC	TIG-rs	16.2973	22206.9
	region	LAC	EHO-rs	65.7895	21370.3								region	LAC	TIG-rs	16.2973	22219.4
	region	USA	TAO-rs	65.7895	21370.3								region	USA	SHG-rs	16.8677	22219.4
	region	USA	TAO-rs	65.7895	21376.2								region	USA	SHG-rs	16.8677	22237.9
	region	CAN	TAO-rs	65.7895	21376.2								region	CAN	SHG-rs	16.8677	22237.9
	region	CAN	TAO-rs	65.7895	21622.8								region	CAN	SHG-rs	16.8677	22242.9
	region	WEU	TAO-rs	65.7895	21622.8								region	WEU	SHG-rs	16.8677	22242.9
	region	WEU	TAO-rs	65.7895	21622.9								region	WEU	SHG-rs	16.8677	22251.1
	region	EEU	TAO-rs	65.7895	21622.9								region	EEU	SHG-rs	16.8677	22251.1
	region	EEU	TAO-rs	65.7895	21622.9								region	EEU	SHG-rs	16.8677	22253.7
	region	FSU	TAO-rs	65.7895	21622.9								region	FSU	SHG-rs	16.8677	22253.7
	region	FSU	TAO-rs	65.7895	21804.5								region	FSU	SHG-rs	16.8677	22278
	region	EAF	TAO-rs	65.7895	21804.5								region	NAF	SHG-rs	16.8677	22278
	region	EAF	TAO-rs	65.7895	21804.6								region	NAF	SHG-rs	16.8677	22287.7
	region	WCA	TAO-rs	65.7895	21804.6								region	EAF	SHG-rs	16.8677	22287.7
	region	WCA	TAO-rs	65.7895	21804.9								region	EAF	SHG-rs	16.8677	22288.5
	region	SAF	TAO-rs	65.7895	21804.9								region	WCA	SHG-rs	16.8677	22288.5
	region	SAF	TAO-rs	65.7895	21805.1								region	WCA	SHG-rs	16.8677	22291.9
	region	CHN	TAO-rs	65.7895	21805.1								region	SAF	SHG-rs	16.8677	22291.9
	region	CHN	TAO-rs	65.7895	21805.2								region	SAF	SHG-rs	16.8677	22301.7
	region	PAS	TAO-rs	65.7895	21805.2								region	MEE	SHG-rs	16.8677	22301.7
	region	PAS	TAO-rs	65.7895	21805.4								region	MEE	SHG-rs	16.8677	22303.4
	region	LAC	TAO-rs	65.7895	21805.4								region	CHN	SHG-rs	16.8677	22303.4
	region	LAC	TAO-rs	65.7895	21970.5								region	CHN	SHG-rs	16.8677	22331.9
	region	USA	SHO-rs	65.7895	21970.5								region	OEA	SHG-rs	16.8677	22331.9
	region	USA	SHO-rs	65.7895	22273.5								region	OEA	SHG-rs	16.8677	22332.8
	region	CAN	SHO-rs	65.7895	22273.5								region	IND	SHG-rs	16.8677	22332.8
	region	CAN	SHO-rs	65.7895	22275.7								region	IND	SHG-rs	16.8677	22333.6
	region	WEU	SHO-rs	65.7895	22275.7								region	OSA	SHG-rs	16.8677	22333.6
	region	WEU	SHO-rs	65.7895	22285.9								region	OSA	SHG-rs	16.8677	22336.1
	region	EEU	SHO-rs	65.7895	22285.9								region	OCN	SHG-rs	16.8677	22336.1
	region	EEU	SHO-rs	65.7895	22286								region	OCN	SHG-rs	16.8677	22342.2
	region	FSU	SHO-rs	65.7895	22286								region	PAS	SHG-rs	16.8677	22342.2
	region	FSU	SHO-rs	65.7895	22332.9								region	PAS	SHG-rs	16.8677	22343
	region	NAF	SHO-rs	65.7895	22332.9								region	LAC	SHG-rs	16.8677	22343
	region	NAF	SHO-rs	65.7895	22341.9								region	LAC	SHG-rs	16.8677	22384.9
	region	EAF	SHO-rs	65.7895	22341.9								region	USA	CMG-rs	16.9379	22384.9
	region	EAF	SHO-rs	65.7895	22341.9								region	USA	CMG-rs	16.9379	22401.7
	region	WCA	SHO-rs	65.7895	22341.9								region	CAN	CMG-rs	16.9379	22401.7
	region	WCA	SHO-rs	65.7895	22356.3								region	CAN	CMG-rs	16.9379	22407.3
	region	SAF	SHO-rs	65.7895	22356.3								region	WEU	CMG-rs	16.9379	22407.3
	region	SAF	SHO-rs	65.7895	22356.3								region	WEU	CMG-rs	16.9379	22412.9
	region	MEE	SHO-rs	65.7895	22356.3								region	EEU	CMG-rs	16.9379	22412.9
	region	MEE	SHO-rs	65.7895	22362.1								region	EEU	CMG-rs	16.9379	22414.7
	region	CHN	SHO-rs	65.7895	22362.1								region	FSU	CMG-rs	16.9379	22414.7
	region	CHN	SHO-rs	65.7895	22364.1								region	FSU	CMG-rs	16.9379	22433.3
	region	OEA	SHO-rs	65.7895	22364.1								region	NAF	CMG-rs	16.9379	22433.3
	region	OEA	SHO-rs	65.7895	22364.2								region	NAF	CMG-rs	16.9379	22437.1
	region	OCN	SHO-rs	65.7895	22364.2								region	EAF	CMG-rs	16.9379	22437.1
	region	OCN	SHO-rs	65.7895	22368.7								region	EAF	CMG-rs	16.9379	22438.9
	region	PAS	SHO-rs	65.7895	22368.7								region	WCA	CMG-rs	16.9379	22438.9
	region	PAS	SHO-rs	65.7895	22369.9								region	WCA	CMG-rs	16.9379	22440.8
	region	LAC	SHO-rs	65.7895	22369.9								region	SAF	CMG-rs	16.9379	22440.8
	region	LAC	SHO-rs	65.7895	22378.8								region	SAF	CMG-rs	16.9379	22442.7
	region	USA	EHO-rs	78.6184	22378.8								region	MEE	CMG-rs	16.9379	22442.7
	region	USA	EHO-rs	78.6184	22624.2								region	MEE	CMG-rs	16.9379	22444.5
	region	CAN	EHO-rs	78.6184	22624.2								region	CHN	CMG-rs	16.9379	22444.5
	region	CAN	EHO-rs	78.6184	22655								region	CHN	CMG-rs	16.9379	22459.4
	region	WEU	EHO-rs	78.6184	22655								region	OEA	CMG-rs	16.9379	22459.4
	region	WEU	EHO-rs	78.6184	22656.8								region	OEA	CMG-rs	16.9379	22459.8
	region	EEU	EHO-rs	78.6184	22656.8								region	IND	CMG-rs	16.9379	22459.8
	region	EEU	EHO-rs	78.6184	22656.8								region	IND	CMG-rs	16.9379	22465.4
	region	FSU	EHO-rs	78.6184	22656.8								region	OSA	CMG-rs	16.9379	22465.4
	region	FSU	EHO-rs	78.6184	22657.3								region	OSA	CMG-rs	16.9379	22466.5
	region	NAF	EHO-rs	78.6184	22657.3								region	JPN	CMG-rs	16.9379	22466.5
	region	NAF	EHO-rs	78.6184	22658.7								region	JPN	CMG-rs	16.9379	22467.6
	region	MEE	EHO-rs	78.6184	22658.7								region	OCN	CMG-rs	16.9379	22467.6
	region	MEE	EHO-rs	78.6184	22790.7								region	OCN	CMG-rs	16.9379	22471.3
	region	CHN	EHO-rs	78.6184	22790.7								region	PAS	CMG-rs	16.9379	22471.3
	region	CHN	EHO-rs	78.6184	22804.8								region	PAS	CMG-rs	16.9379	22472.5
	region	OEA	EHO-rs	78.6184	22804.8								region	LAC	CMG-rs	16.9379	22472.5
	region	OEA	EHO-rs	78.6184	22808.3								region	LAC	CMG-rs	16.9379	22478.1
	region	IND	EHO-rs	78.6184	22808.3								region	USA	TIG-rs	19.3576	22478.1
	region	IND	EHO-rs	78.6184	22809.3								region	USA	TIG-rs	19.3576	22506.4
	region	LAC	EHO-rs	78.6184	22809.3								region	CAN	TIG-rs	19.3576	22506.4
	region	LAC	EHO-rs	78.6184	22809.5								region	CAN	TIG-rs	19.3576	22522.8
	region	USA	TAO-rs	78.6184	22809.5								region	WEU	TIG-rs	19.3576	22522.8
	region	USA	TAO-rs	78.6184	22822.8								region	WEU	TIG-rs	19.3576	22526.5
	region	CAN	TAO-rs	78.6184	22822.8								region	EEU	TIG-rs	19.3576	22526.5
	region	CAN	TAO-rs	78.6184	22946.1								region	EEU	TIG-rs	19.3576	22530.2
	region	WEU	TAO-rs	78.6184	22946.1								region	FSU	TIG-rs	19.3576	22530.2
	region	WEU	TAO-rs	78.6184	22946.4								region	FSU	TIG-rs	19.3576	22556.3
	region	EEU	TAO-rs	78.6184	22946.4								region	NAF	TIG-rs	19.3576	22556.3
	region	EEU	TAO-rs	78.6184	22946.6								region	NAF	TIG-rs	19.3576	22563.8
	region	FSU	TAO-rs	78.6184	22946.6								region	EAF	TIG-rs	19.3576	22563.8
	region	FSU	TAO-rs	78.6184	23309.8								region	EAF	TIG-rs	19.3576	22567.5
	region	EAF	TAO-rs	78.6184	23309.8								region	WCA	TIG-rs	19.3576	22567.5
	region	EAF	TAO-rs	78.6184	23310.1								region	WCA	TIG-rs	19.3576	22578.7
	region	WCA	TAO-rs	78.6184	23310.1								region	SAF	TIG-rs	19.3576	22578.7
	region	WCA	TAO-rs	78.6184	23310.7								region	SAF	TIG-rs	19.3576	22582.4
	region	SAF	TAO-rs	78.6184	23310.7								region	MEE	TIG-rs	19.3576	22582.4
	region	SAF	TAO-rs	78.6184	23311.2								region	MEE	TIG-rs	19.3576	22597.3
	region	CHN	TAO-rs	78.6184	23311.2								region	CHN	TIG-rs	19.3576	22597.3
	region	CHN	TAO-rs	78.6184	23311.4								region	CHN	TIG-rs	19.3576	22601
	region	PAS	TAO-rs	78.6184	23311.4								region	OEA	TIG-rs	19.3576	22601
	region	PAS	TAO-rs	78.6184	23311.8								region	OEA	TIG-rs	19.3576	22604.7
	region	LAC	TAO-rs	78.6184	23311.8								region	IND	TIG-rs	19.3576	22604.7
	region	LAC	TAO-rs	78.6184	23751.9								region	IND	TIG-rs	19.3576	22608.4
	region	USA	SHO-rs	78.6184	23751.9								region	OSA	TIG-rs	19.3576	22608.4
	region	USA	SHO-rs	78.6184	24433.7								region	OSA	TIG-rs	19.3576	22615.9
	region	CAN	SHO-rs	78.6184	24433.7								region	OCN	TIG-rs	19.3576	22615.9
	region	CAN	SHO-rs	78.6184	24434.9								region	OCN	TIG-rs	19.3576	22619.6
	region	WEU	SHO-rs	78.6184	24434.9								region	PAS	TIG-rs	19.3576	22619.6
	region	WEU	SHO-rs	78.6184	24475.6								region	PAS	TIG-rs	19.3576	22627.1
	region	EEU	SHO-rs	78.6184	24475.6								region	LAC	TIG-rs	19.3576	22627.1
	region	EEU	SHO-rs	78.6184	24475.9								region	LAC	TIG-rs	19.3576	22638.3
	region	FSU	SHO-rs	78.6184	24475.9								region	USA	CMG-rs	19.8834	22638.3
	region	FSU	SHO-rs	78.6184	24569.6								region	USA	CMG-rs	19.8834	22655
	region	NAF	SHO-rs	78.6184	24569.6								region	CAN	CMG-rs	19.8834	22655
	region	NAF	SHO-rs	78.6184	24601.2								region	CAN	CMG-rs	19.8834	22660.6
	region	EAF	SHO-rs	78.6184	24601.2								region	WEU	CMG-rs	19.8834	22660.6
	region	EAF	SHO-rs	78.6184	24601.2								region	WEU	CMG-rs	19.8834	22666.2
	region	WCA	SHO-rs	78.6184	24601.2								region	EEU	CMG-rs	19.8834	22666.2
	region	WCA	SHO-rs	78.6184	24630								region	EEU	CMG-rs	19.8834	22668.1
	region	SAF	SHO-rs	78.6184	24630								region	FSU	CMG-rs	19.8834	22668.1
	region	SAF	SHO-rs	78.6184	24630								region	FSU	CMG-rs	19.8834	22686.7
	region	MEE	SHO-rs	78.6184	24630								region	NAF	CMG-rs	19.8834	22686.7
	region	MEE	SHO-rs	78.6184	24638.8								region	NAF	CMG-rs	19.8834	22690.4
	region	CHN	SHO-rs	78.6184	24638.8								region	EAF	CMG-rs	19.8834	22690.4
	region	CHN	SHO-rs	78.6184	24644.5								region	EAF	CMG-rs	19.8834	22692.3
	region	OEA	SHO-rs	78.6184	24644.5								region	WCA	CMG-rs	19.8834	22692.3
	region	OEA	SHO-rs	78.6184	24644.6								region	WCA	CMG-rs	19.8834	22694.1
	region	OCN	SHO-rs	78.6184	24644.6								region	SAF	CMG-rs	19.8834	22694.1
	region	OCN	SHO-rs	78.6184	24656								region	SAF	CMG-rs	19.8834	22696
	region	PAS	SHO-rs	78.6184	24656								region	MEE	CMG-rs	19.8834	22696
	region	PAS	SHO-rs	78.6184	24658.4								region	MEE	CMG-rs	19.8834	22697.9
	region	LAC	SHO-rs	78.6184	24658.4								region	CHN	CMG-rs	19.8834	22697.9
	region	LAC	SHO-rs	78.6184	24682.1								region	CHN	CMG-rs	19.8834	22712.8
													region	OEA	CMG-rs	19.8834	22712.8
													region	OEA	CMG-rs	19.8834	22713.1
													region	IND	CMG-rs	19.8834	22713.1
													region	IND	CMG-rs	19.8834	22718.7
													region	OSA	CMG-rs	19.8834	22718.7
													region	OSA	CMG-rs	19.8834	22719.8
													region	JPN	CMG-rs	19.8834	22719.8
													region	JPN	CMG-rs	19.8834	22721
													region	OCN	CMG-rs	19.8834	22721
													region	OCN	CMG-rs	19.8834	22724.7
													region	PAS	CMG-rs	19.8834	22724.7
													region	PAS	CMG-rs	19.8834	22725.8
													region	LAC	CMG-rs	19.8834	22725.8
													region	LAC	CMG-rs	19.8834	22731.4
													region	USA	SHG-rs	20.0351	22731.4
													region	USA	SHG-rs	20.0351	22747.8
													region	CAN	SHG-rs	20.0351	22747.8
													region	CAN	SHG-rs	20.0351	22752.3
													region	WEU	SHG-rs	20.0351	22752.3
													region	WEU	SHG-rs	20.0351	22759.6
													region	EEU	SHG-rs	20.0351	22759.6
													region	EEU	SHG-rs	20.0351	22761.8
													region	FSU	SHG-rs	20.0351	22761.8
													region	FSU	SHG-rs	20.0351	22783.4
													region	NAF	SHG-rs	20.0351	22783.4
													region	NAF	SHG-rs	20.0351	22792
													region	EAF	SHG-rs	20.0351	22792
													region	EAF	SHG-rs	20.0351	22792.8
													region	WCA	SHG-rs	20.0351	22792.8
													region	WCA	SHG-rs	20.0351	22795.8
													region	SAF	SHG-rs	20.0351	22795.8
													region	SAF	SHG-rs	20.0351	22804.5
													region	MEE	SHG-rs	20.0351	22804.5
													region	MEE	SHG-rs	20.0351	22806
													region	CHN	SHG-rs	20.0351	22806
													region	CHN	SHG-rs	20.0351	22831.4
													region	OEA	SHG-rs	20.0351	22831.4
													region	OEA	SHG-rs	20.0351	22832.1
													region	IND	SHG-rs	20.0351	22832.1
													region	IND	SHG-rs	20.0351	22832.9
													region	OSA	SHG-rs	20.0351	22832.9
													region	OSA	SHG-rs	20.0351	22835.1
													region	OCN	SHG-rs	20.0351	22835.1
													region	OCN	SHG-rs	20.0351	22840.5
													region	PAS	SHG-rs	20.0351	22840.5
													region	PAS	SHG-rs	20.0351	22841.2
													region	LAC	SHG-rs	20.0351	22841.2
													region	LAC	SHG-rs	20.0351	22878.5
													region	USA	TIG-rs	22.7239	22878.5
													region	USA	TIG-rs	22.7239	22906.8
													region	CAN	TIG-rs	22.7239	22906.8
													region	CAN	TIG-rs	22.7239	22923.2
													region	WEU	TIG-rs	22.7239	22923.2
													region	WEU	TIG-rs	22.7239	22926.9
													region	EEU	TIG-rs	22.7239	22926.9
													region	EEU	TIG-rs	22.7239	22930.6
													region	FSU	TIG-rs	22.7239	22930.6
													region	FSU	TIG-rs	22.7239	22956.7
													region	NAF	TIG-rs	22.7239	22956.7
													region	NAF	TIG-rs	22.7239	22964.2
													region	EAF	TIG-rs	22.7239	22964.2
													region	EAF	TIG-rs	22.7239	22967.9
													region	WCA	TIG-rs	22.7239	22967.9
													region	WCA	TIG-rs	22.7239	22979.1
													region	SAF	TIG-rs	22.7239	22979.1
													region	SAF	TIG-rs	22.7239	22982.8
													region	MEE	TIG-rs	22.7239	22982.8
													region	MEE	TIG-rs	22.7239	22997.7
													region	CHN	TIG-rs	22.7239	22997.7
													region	CHN	TIG-rs	22.7239	23001.4
													region	OEA	TIG-rs	22.7239	23001.4
													region	OEA	TIG-rs	22.7239	23005.1
													region	IND	TIG-rs	22.7239	23005.1
													region	IND	TIG-rs	22.7239	23008.9
													region	OSA	TIG-rs	22.7239	23008.9
													region	OSA	TIG-rs	22.7239	23016.3
													region	OCN	TIG-rs	22.7239	23016.3
													region	OCN	TIG-rs	22.7239	23020
													region	PAS	TIG-rs	22.7239	23020
													region	PAS	TIG-rs	22.7239	23027.5
													region	LAC	TIG-rs	22.7239	23027.5
													region	LAC	TIG-rs	22.7239	23038.7
													region	USA	CMG-rs	23.1235	23038.7
													region	USA	CMG-rs	23.1235	23051.3
													region	CAN	CMG-rs	23.1235	23051.3
													region	CAN	CMG-rs	23.1235	23055.5
													region	WEU	CMG-rs	23.1235	23055.5
													region	WEU	CMG-rs	23.1235	23059.6
													region	EEU	CMG-rs	23.1235	23059.6
													region	EEU	CMG-rs	23.1235	23061
													region	FSU	CMG-rs	23.1235	23061
													region	FSU	CMG-rs	23.1235	23075
													region	NAF	CMG-rs	23.1235	23075
													region	NAF	CMG-rs	23.1235	23077.8
													region	EAF	CMG-rs	23.1235	23077.8
													region	EAF	CMG-rs	23.1235	23079.2
													region	WCA	CMG-rs	23.1235	23079.2
													region	WCA	CMG-rs	23.1235	23080.6
													region	SAF	CMG-rs	23.1235	23080.6
													region	SAF	CMG-rs	23.1235	23082
													region	MEE	CMG-rs	23.1235	23082
													region	MEE	CMG-rs	23.1235	23083.4
													region	CHN	CMG-rs	23.1235	23083.4
													region	CHN	CMG-rs	23.1235	23094.6
													region	OEA	CMG-rs	23.1235	23094.6
													region	OEA	CMG-rs	23.1235	23094.8
													region	IND	CMG-rs	23.1235	23094.8
													region	IND	CMG-rs	23.1235	23099
													region	OSA	CMG-rs	23.1235	23099
													region	OSA	CMG-rs	23.1235	23099.9
													region	JPN	CMG-rs	23.1235	23099.9
													region	JPN	CMG-rs	23.1235	23100.7
													region	OCN	CMG-rs	23.1235	23100.7
													region	OCN	CMG-rs	23.1235	23103.5
													region	PAS	CMG-rs	23.1235	23103.5
													region	PAS	CMG-rs	23.1235	23104.4
													region	LAC	CMG-rs	23.1235	23104.4
													region	LAC	CMG-rs	23.1235	23108.5
													region	USA	SHG-rs	23.5192	23108.5
													region	USA	SHG-rs	23.5192	23124.9
													region	CAN	SHG-rs	23.5192	23124.9
													region	CAN	SHG-rs	23.5192	23129.4
													region	WEU	SHG-rs	23.5192	23129.4
													region	WEU	SHG-rs	23.5192	23136.7
													region	EEU	SHG-rs	23.5192	23136.7
													region	EEU	SHG-rs	23.5192	23139
													region	FSU	SHG-rs	23.5192	23139
													region	FSU	SHG-rs	23.5192	23160.6
													region	NAF	SHG-rs	23.5192	23160.6
													region	NAF	SHG-rs	23.5192	23169.2
													region	EAF	SHG-rs	23.5192	23169.2
													region	EAF	SHG-rs	23.5192	23169.9
													region	WCA	SHG-rs	23.5192	23169.9
													region	WCA	SHG-rs	23.5192	23172.9
													region	SAF	SHG-rs	23.5192	23172.9
													region	SAF	SHG-rs	23.5192	23181.6
													region	MEE	SHG-rs	23.5192	23181.6
													region	MEE	SHG-rs	23.5192	23183.1
													region	CHN	SHG-rs	23.5192	23183.1
													region	CHN	SHG-rs	23.5192	23208.5
													region	OEA	SHG-rs	23.5192	23208.5
													region	OEA	SHG-rs	23.5192	23209.3
													region	IND	SHG-rs	23.5192	23209.3
													region	IND	SHG-rs	23.5192	23210
													region	OSA	SHG-rs	23.5192	23210
													region	OSA	SHG-rs	23.5192	23212.3
													region	OCN	SHG-rs	23.5192	23212.3
													region	OCN	SHG-rs	23.5192	23217.6
													region	PAS	SHG-rs	23.5192	23217.6
													region	PAS	SHG-rs	23.5192	23218.4
													region	LAC	SHG-rs	23.5192	23218.4
													region	LAC	SHG-rs	23.5192	23255.6
													region	USA	TIG-rs	26.4268	23255.6
													region	USA	TIG-rs	26.4268	23276.9
													region	CAN	TIG-rs	26.4268	23276.9
													region	CAN	TIG-rs	26.4268	23289.2
													region	WEU	TIG-rs	26.4268	23289.2
													region	WEU	TIG-rs	26.4268	23291.9
													region	EEU	TIG-rs	26.4268	23291.9
													region	EEU	TIG-rs	26.4268	23294.7
													region	FSU	TIG-rs	26.4268	23294.7
													region	FSU	TIG-rs	26.4268	23314.3
													region	NAF	TIG-rs	26.4268	23314.3
													region	NAF	TIG-rs	26.4268	23319.9
													region	EAF	TIG-rs	26.4268	23319.9
													region	EAF	TIG-rs	26.4268	23322.7
													region	WCA	TIG-rs	26.4268	23322.7
													region	WCA	TIG-rs	26.4268	23331.1
													region	SAF	TIG-rs	26.4268	23331.1
													region	SAF	TIG-rs	26.4268	23333.9
													region	MEE	TIG-rs	26.4268	23333.9
													region	MEE	TIG-rs	26.4268	23345
													region	CHN	TIG-rs	26.4268	23345
													region	CHN	TIG-rs	26.4268	23347.8
													region	OEA	TIG-rs	26.4268	23347.8
													region	OEA	TIG-rs	26.4268	23350.6
													region	IND	TIG-rs	26.4268	23350.6
													region	IND	TIG-rs	26.4268	23353.4
													region	OSA	TIG-rs	26.4268	23353.4
													region	OSA	TIG-rs	26.4268	23359
													region	OCN	TIG-rs	26.4268	23359
													region	OCN	TIG-rs	26.4268	23361.8
													region	PAS	TIG-rs	26.4268	23361.8
													region	PAS	TIG-rs	26.4268	23367.4
													region	LAC	TIG-rs	26.4268	23367.4
													region	LAC	TIG-rs	26.4268	23375.8
													region	USA	SHG-rs	27.3518	23375.8
													region	USA	SHG-rs	27.3518	23388.1
													region	CAN	SHG-rs	27.3518	23388.1
													region	CAN	SHG-rs	27.3518	23391.4
													region	WEU	SHG-rs	27.3518	23391.4
													region	WEU	SHG-rs	27.3518	23396.9
													region	EEU	SHG-rs	27.3518	23396.9
													region	EEU	SHG-rs	27.3518	23398.6
													region	FSU	SHG-rs	27.3518	23398.6
													region	FSU	SHG-rs	27.3518	23414.8
													region	NAF	SHG-rs	27.3518	23414.8
													region	NAF	SHG-rs	27.3518	23421.3
													region	EAF	SHG-rs	27.3518	23421.3
													region	EAF	SHG-rs	27.3518	23421.8
													region	WCA	SHG-rs	27.3518	23421.8
													region	WCA	SHG-rs	27.3518	23424
													region	SAF	SHG-rs	27.3518	23424
													region	SAF	SHG-rs	27.3518	23430.6
													region	MEE	SHG-rs	27.3518	23430.6
													region	MEE	SHG-rs	27.3518	23431.7
													region	CHN	SHG-rs	27.3518	23431.7
													region	CHN	SHG-rs	27.3518	23450.8
													region	OEA	SHG-rs	27.3518	23450.8
													region	OEA	SHG-rs	27.3518	23451.3
													region	IND	SHG-rs	27.3518	23451.3
													region	IND	SHG-rs	27.3518	23451.9
													region	OSA	SHG-rs	27.3518	23451.9
													region	OSA	SHG-rs	27.3518	23453.6
													region	OCN	SHG-rs	27.3518	23453.6
													region	OCN	SHG-rs	27.3518	23457.6
													region	PAS	SHG-rs	27.3518	23457.6
													region	PAS	SHG-rs	27.3518	23458.1
													region	LAC	SHG-rs	27.3518	23458.1
													region	LAC	SHG-rs	27.3518	23486.1

## Sheet: 2. Oil data summary (vs SSP2)
	Reservoir type	Reserves/ Resources	Quantity		Cost
			Value (EJ)	Assumption	Value ($US/GJ)	Assumption
OIL	Conventional oil	Reserves	6741	Sources: BGR, USGS	1.74 – 20.84	x 2, x 4
		Resources	4171 (-8%)	Sources: BGR, USGS	1.74 – 20.84	x 2, x 4
	Sub-total		10912 (-3%)		1.74 – 20.84
	Oil sands	Reserves	1337 (-30%)	RR: 70%	7.89 – 21.06	x 3
		Resources	5461 (-39%)	RR: 20%	23.67 – 78.63	x 3
	Heavy and Extra-heavy oil	Reserves	240 (-30%)	RR: 70%	7.89 – 21.07	x 3
		Resources	2229 (-20%)	RR: 20%	23.67 – 78.64	x 3
	Shale oil	Reserves	1044 (-30%)	RR: 70%	7.89 – 21.08	x 3
		Resources	3458 (-39%)	RR: 20%	23.67 – 78.65	x 3
	Sub-total		13770 (-35%)		7.89 – 78.63
	Total		24682 (-24%)		1.74 – 78.63
	LEGEND
	RR	Recovery rate

## Sheet: 3. Gas data summary (vs SSP2)
	Reservoir type	Reserves/ Resources	Quantity		Cost
			Value (EJ)	Assumption	Value ($US/GJ)	Assumption
GAS	Conventional gas	Reserves	6036 (-15%)	Sources: BGR, USGS	0.70 – 13.92	x 2, x 4
		Resources	6232 (-36%)	Sources: BGR, USGS	0.70 – 13.92	x 2, x 4
	Sub-total		12268 (-27%)		0.70 – 13.92
	CBM	Reserves	2032 (-37%)	RR: 50%	4.5 – 8.33	x 1.5
		Resources	466 (-64%)	RR: 5%	11.83 – 23.12	x 1.75
	Deep gas	Reserves	2033	RR: 50%	6.00 – 11.10	x 2
		Resources	0 (-100%)	RR: 0%	-	-
	Tight gas	Reserves	4018 (-13%)	RR: 70%	4.05 – 7.49	x 1.35
		Resources	801 (-29%)	RR: 10%	13.52 – 26.42	x 2
	Shale gas	Reserves	1134 (-68%)	RR: 18%	4.71 – 8.71	x 1.57
		Resources	710 (-75%)	0.1 x MAX(GEA, ARI)	13.99 – 27.34	x 2.07
	Hydrates	Reserves	0	-	-	-
		Resources	0	Hard limit	-	-
	Sub-total		11193 (-41%)		4.05 – 27.34
	Total		23461 (-34%)		0.70 – 27.34
	LEGEND
	RR	Recovery rate

## Sheet: 4. Oil - Resources
	Oil resource data														Assumptions
#	Region code	Conventional		Unconventional											Conventional						Unconventional gas
		oil		oil		Oil sands		Heavy and Extra-heavy oil		Shale oil					oil						Oil sands						Heavy and Extra-heavy oil						Shale oil
		Reserves (EJ)	Resources (EJ)	Reserves (EJ)	Resources (EJ)	Reserves (EJ)	Resources (EJ)	Reserves (EJ)	Resources (EJ)	Reserves (EJ)	Resources (EJ)				Factor	Reserves (EJ)	C	Factor	Resources (EJ)	C	Recovery rate	Reserves (EJ)	C	Recovery rate	Resources (EJ)	C	Recovery rate	Reserves (EJ)	C	Recovery rate	Resources (EJ)	C	Recovery rate	Reserves (EJ)	C	Recovery rate	Resources (EJ)	C
1	USA	162	420	1004.96	3483.53	0	49.4461	46.5991	908.887	958.359	2525.19				1	162	1	1	420	1	0.7	0	3	0.2	247.231	4	0.7	66.5701	3	0.2	4544.44	4	0.7	1369.08	3	0.2	12626	4
2	CAN	28	101	804.523	2586.44	804.494	2054.71	0.0293076	513.302	0	18.4219				1	28	1	1	101	1	0.7	1149.28	3	0.2	10273.6	4	0.7	0.041868	3	0.2	2566.51	4	0.7	0	3	0.2	92.1096	4
3	WEU	88	186	5.74429	119.056	0.967151	0.887602	0.761998	4.85669	4.01514	113.312				1	88	1	1	186	1	0.7	1.38164	3	0.2	4.43801	4	0.7	1.08857	3	0.2	24.2834	4	0.7	5.73592	3	0.2	566.558	4
4	EEU	6	13	0.234461	0.946217	0	0.293076	0.175846	0.100483	0.0586152	0.552658				1	6	1	1	13	1	0.7	0	3	0.2	1.46538	4	0.7	0.251208	3	0.2	0.502416	4	0.7	0.083736	3	0.2	2.76329	4
5	FSU	735	1008	531.464	1906.28	523.698	1513.48	0.61546	2.16039	7.15105	390.645				1	735	1	1	1008	1	0.7	748.139	3	0.2	7567.39	4	0.7	0.879228	3	0.2	10.8019	4	0.7	10.2158	3	0.2	1953.23	4
6	NAF	388	184	4.6306	78.402	0	0	0.234461	3.18197	4.39614	75.22				1	388	1	1	184	1	0.7	0	3	0.2	0	4	0.7	0.334944	3	0.2	15.9098	4	0.7	6.2802	3	0.2	376.1	4
7	EAF	4	13	1.02577	0.971338	1.02577	0.92947	0	0	0	0.041868				1	4	1	1	13	1	0.7	1.46538	3	0.2	4.64735	4	0.7	0	3	0.2	0	4	0.7	0	3	0.2	0.20934	4
8	WCA	254	302	2.84284	122.389	2.84284	2.56232	0	0	0	119.826				1	254	1	1	302	1	0.7	4.0612	3	0.2	12.8116	4	0.7	0	3	0.2	0	4	0.7	0	3	0.2	599.131	4
9	SAF	77	150	2.16876	2.11015	2.16876	1.95105	0	0	0	0.159098				1	77	1	1	150	1	0.7	3.09823	3	0.2	9.75524	4	0.7	0	3	0.2	0	4	0.7	0	3	0.2	0.795492	4
10	MEE	4286	889	38.7153	782.228	0	0	0.0293076	733.695	38.686	48.5334				1	4286	1	1	889	1	0.7	0	3	0.2	0	4	0.7	0.041868	3	0.2	3668.47	4	0.7	55.2658	3	0.2	242.667	4
11	CHN	84	97	9.08536	66.7041	0	0.74525	3.4876	46.7833	5.59775	19.1755				1	84	1	1	97	1	0.7	0	3	0.2	3.72625	4	0.7	4.98229	3	0.2	233.917	4	0.7	7.99679	3	0.2	95.8777	4
12	OEA	26	32	0	12.2422	0	0	0	11.8905	0	0.351691				1	26	1	1	32	1	0.7	0	3	0.2	0	4	0.7	0	3	0.2	59.4526	4	0.7	0	3	0.2	1.75846	4
13	IND	33	17	0	3.60065	0	0	0	3.60065	0	0				1	33	1	1	17	1	0.7	0	3	0.2	0	4	0.7	0	3	0.2	18.0032	4	0.7	0	3	0.2	0	4
14	OSA	2	13	0	0	0	0	0	0	0	0				1	2	1	1	13	1	0.7	0	3	0.2	0	4	0.7	0	3	0.2	0	4	0.7	0	3	0.2	0	4
15	JPN	0	0	0	0	0	0	0	0	0	0				1	0	1	1	0	1	0.7	0	3	0.2	0	4	0.7	0	3	0.2	0	4	0.7	0	3	0.2	0	4
16	OCN	24	44	15.1813	37.9659	0	0	0	0	15.1813	37.9659				1	24	1	1	44	1	0.7	0	3	0.2	0	4	0.7	0	3	0.2	0	4	0.7	21.6876	3	0.2	189.83	4
17	PAS	65	88	9.17328	11.924	2.05153	1.85894	0	0	7.12175	10.0651				1	65	1	1	88	1	0.7	2.93076	3	0.2	9.2947	4	0.7	0	3	0.2	0	4	0.7	10.1739	3	0.2	50.3253	4
18	LAC	479	614	192.17	1933.41	0	1833.82	188.243	0.83736	3.92722	98.7582				1	479	1	1	614	1	0.7	0	3	0.2	9169.09	4	0.7	268.918	3	0.2	4.1868	4	0.7	5.61031	3	0.2	493.791	4
19	SOO	0	0	0	0	0	0	0	0	0	0				0	0	-	0	0	-	0.7	0	3	0	0	4	0.7	0	3	0	0	4	0.7	0	3	0	0	4
20	ARC	0	0	0	0	0	0	0	0	0	0				0	0	-	0	767.761	2	0.7	0	3	0	0	4	0.7	0	3	0	0	4	0.7	0	3	0	0	4
	SUB-TOTAL	6741	4171	2621.92	11148.2	1337.25	5460.68	240.176	2229.3	1044.49	3458.22				C stands for comments (see below)
	TOTAL	10912		13770.1
	Grand TOTAL	24682.1													Comments
	Legend														#	Reference	Comment
	Reserves														1	1, 2	Using the most recent BGR data instead of USGS data (as reported in GEA Table 7.6 chap.7 p. 440)
	Resources														2	EJ	Scenario assumption: Arctic resources not available
															3	EJ	Scenario assumption: Recovery rate for unconventional reserves set to 70%
															4	EJ	Scenario assumption: Recovery rate for unconventional resources set to 20%
															References are listed in tab 'References' - Grey cells indicate default GEA assumptions/data - EJ: Expert judgement

## Sheet: 5. Oil - Production costs
	Oil production costs data									Assumptions
#	Reservoir type	Category	Regional distinction	Production costs ($/GJ)		# cost bins				#	Reservoir type	Category	Regional distinction	GEA extraction costs ($/GJ)		# cost bins	Cost multiplier	Cost mark-up ($/GJ)	C
				Min	Max									Min	Max
1	Conventional	Reserves	MEE, FSU	1.74	10.42	4				1	Conventional	Reserves	MEE, FSU	0.87	5.21	4	2	0	1
2		Reserves	rest	3.48	20.84	4				2		Reserves	rest	0.87	5.21	4	4	0	2
3		Resources	MEE, FSU	1.74	10.42	4				3		Resources	MEE, FSU	0.87	5.21	4	2	0	1
4		Resources	rest	3.48	20.84	4				4		Resources	rest	0.87	5.21	4	4	0	2
-	Unconventional	Reserves	all	7.89	21.06	6				-	Unconventional	Reserves	all	2.63	7.02	6	-	-
-		Resources	all	23.67	78.63	8				-		Resources	all	7.89	26.21	8	-	-
5	Oil sands	Reserves	all	7.89	21.06	6				5	Oil sands	Reserves	all	2.63	7.02	6	3	0	3
6		Resources	all	23.67	78.63	8				6		Resources	all	7.89	26.21	8	3	0	3
7	Heavy and Extra-heavy oil	Reserves	all	7.89	21.06	6				7	Heavy and Extra-heavy oil	Reserves	all	2.63	7.02	6	3	0	3
8		Resources	all	23.67	78.63	8				8		Resources	all	7.89	26.21	8	3	0	3
9	Shale oil	Reserves	all	7.89	21.06	6				9	Shale oil	Reserves	all	2.63	7.02	6	3	0	3
10		Resources	all	23.67	78.63	8				10		Resources	all	7.89	26.21	8	3	0	3
										C stands for comments (see below)
										Comments (references are listed in tab 'References' )
										#	Reference	Comment
										1	11, EJ	Scenario assumption: Increasing costs of conventional reserves by a factor of 2 in the MEE and FSU regions. This cost adjustment reflects the significant cost increase over the past decade as shown by the CERA upstream indices (+13% c/w SSP2)
										2	11, EJ	Scenario assumption: Increasing costs of conventional reserves by a factor of 2.52 in the remaining regions. This cost adjustment reflects the significant cost increase over the past decade as shown by the CERA upstream indices (+59% c/w SSP2)
										3	EJ	Scenario assumption: Increasing costs of all unconventionals by a factor of 3
										References are listed in tab 'References' - Grey cells indicate default GEA assumptions/data - EJ: Expert judgement

## Sheet: 6. Gas - Resources
	Gas resource data																		Assumptions
#	Region code	Conventional		Unconventional															Conventional						Unconventional gas
		Gas		Gas		Deep Gas		Coal-bed methane		Tight gas		Shale gas		Gas hydrates					Gas						Deep Gas						Coal-bed methane						Tight gas						Shale gas						Gas hydrates
		Reserves (EJ)	Resources (EJ)	Reserves (EJ)	Resources (EJ)	Reserves (EJ)	Resources (EJ)	Reserves (EJ)	Resources (EJ)	Reserves (EJ)	Resources (EJ)	Reserves (EJ)	Resources (EJ)	Reserves (EJ)	Resources (EJ)				Factor	Reserves (EJ)	C	Factor	Resources (EJ)	C	Recovery rate	Reserves (EJ)	C	Recovery rate	Resources (EJ)	C	Recovery rate	Reserves (EJ)	C	Recovery rate	Resources (EJ)	C	Recovery rate	Reserves (EJ)	C	Recovery rate	Resources (EJ)	C	Recovery rate	Reserves (EJ)	C	Recovery rate	Resources (EJ)	C	Recovery rate
1	USA	222.7	518	1955.94	307.41	372.5	0	465.5	83.85	782.6	141.6	335.34	81.96	0	0				0.85	262	1	0.7	740	1	0.5	745	3	0	1677	4	0.5	931	5	0.05	1677	6	0.7	1118	7	0.1	1416	8	0.18	1863	9	0.02	4098	10	0
2	CAN	55.25	181.3	648.28	132.284	93	0	130.5	27.95	391.3	82	33.48	22.334	0	0				0.85	65	1	0.7	259	1	0.5	186	3	0	373	4	0.5	261	5	0.05	559	6	0.7	559	7	0.1	820	8	0.18	186	9	0.0598767	373	10	0
3	WEU	137.7	219.1	331.12	63.32	56	0	130.5	27.95	104.3	18.6	40.32	16.77	0	0				0.85	162	1	0.7	313	1	0.5	112	3	0	186	4	0.5	261	5	0.05	559	6	0.7	149	7	0.1	186	8	0.18	224	9	0.03	559	10	0
4	EEU	26.35	16.1	238.12	33.49	56	0	37.5	9.3	104.3	18.6	40.32	5.59	0	0				0.85	31	1	0.7	23	1	0.5	112	3	0	186	4	0.5	75	5	0.05	186	6	0.7	149	7	0.1	186	8	0.18	224	9	0.01	559	10	0
5	FSU	1999.2	3032.4	2063.9	331.59	559	0	372.5	93.15	730.1	130.4	402.3	108.04	0	0				0.85	2352	1	0.7	4332	1	0.5	1118	3	0	1863	4	0.5	745	5	0.05	1863	6	0.7	1043	7	0.1	1304	8	0.18	2235	9	0.02	5402	10	0
6	NAF	263.5	226.8	496.42	99.075	186.5	0	74.5	18.65	208.6	37.3	26.82	43.125	0	0				0.85	310	1	0.7	324	1	0.5	373	3	0	559	4	0.5	149	5	0.05	373	6	0.7	298	7	0.1	373	8	0.18	149	9	0.115617	373	10	0
7	EAF	0.85	15.4	211.3	31.62	56	0	37.5	9.3	104.3	18.6	13.5	3.72	0	0				0.85	1	1	0.7	22	1	0.5	112	3	0	186	4	0.5	75	5	0.05	186	6	0.7	149	7	0.1	186	8	0.18	75	9	0.02	186	10	0
8	WCA	181.05	128.1	534.54	80.1	130.5	0	37.5	9.3	312.9	55.9	53.64	14.9	0	0				0.85	213	1	0.7	183	1	0.5	261	3	0	559	4	0.5	75	5	0.05	186	6	0.7	447	7	0.1	559	8	0.18	298	9	0.02	745	10	0
9	SAF	17.85	49	166.9	71.5675	37.5	0	37.5	9.3	78.4	18.6	13.5	43.6675	0	0				0.85	21	1	0.7	70	1	0.5	75	3	0	186	4	0.5	75	5	0.05	186	6	0.7	112	7	0.1	186	8	0.18	75	9	0.234772	186	10	0
10	MEE	2369.8	916.3	586.12	91.26	130.5	0	37.5	9.3	391.3	74.5	26.82	7.46	0	0				0.85	2788	1	0.7	1309	1	0.5	261	3	0	559	4	0.5	75	5	0.05	186	6	0.7	559	7	0.1	745	8	0.18	149	9	0.02	373	10	0
11	CHN	77.35	259	408.9	220.113	37.5	0	279.5	74.5	78.4	18.6	13.5	127.013	0	0				0.85	91	1	0.7	370	1	0.5	75	3	0	186	4	0.5	559	5	0.05	1490	6	0.7	112	7	0.1	186	8	0.18	75	9	0.682863	186	10	0
12	OEA	22.1	42	91.9	24.17	0	0	0	1.85	78.4	18.6	13.5	3.72	0	0				0.85	26	1	0.7	60	1	0.5	0	3	0	37	4	0.5	0	5	0.05	37	6	0.7	112	7	0.1	186	8	0.18	75	9	0.02	186	10	0
13	IND	34.85	23.1	259.9	50.27	37.5	0	130.5	27.95	78.4	18.6	13.5	3.72	0	0				0.85	41	1	0.7	33	1	0.5	75	3	0	186	4	0.5	261	5	0.05	559	6	0.7	112	7	0.1	186	8	0.18	75	9	0.02	186	10	0
14	OSA	41.65	56.7	308.62	54.08	93	0	18.5	5.6	156.8	37.3	40.32	11.18	0	0				0.85	49	1	0.7	81	1	0.5	186	3	0	373	4	0.5	37	5	0.05	112	6	0.7	224	7	0.1	373	8	0.18	224	9	0.02	559	10	0
15	JPN	0.85	0	18.5	5.6	0	0	18.5	5.6	0	0	0	0	0	0				0.85	1	1	0.7	0	1	0.5	0	3	0	0	4	0.5	37	5	0.05	112	6	0.7	0	7	0.1	0	8	0.18	0	9	0.02	0	10	0
16	OCN	97.75	54.6	261.62	64.128	37.5	0	93	18.65	104.3	18.6	26.82	26.878	0	0				0.85	115	1	0.7	78	1	0.5	75	3	0	186	4	0.5	186	5	0.05	373	6	0.7	149	7	0.1	186	8	0.18	149	9	0.072059	373	10	0
17	PAS	232.9	212.8	226.3	46.62	37.5	0	18.5	5.6	156.8	37.3	13.5	3.72	0	0				0.85	274	1	0.7	304	1	0.5	75	3	0	186	4	0.5	37	5	0.05	112	6	0.7	224	7	0.1	373	8	0.18	75	9	0.02	186	10	0
18	LAC	254.15	281.4	407.62	270.033	112	0	112	27.95	156.8	55.9	26.82	186.183	0	0				0.85	299	1	0.7	402	1	0.5	224	3	0	559	4	0.5	224	5	0.05	559	6	0.7	224	7	0.1	559	8	0.18	149	9	0.49915	373	10	0
19	SOO	0	0	0	0	0	0	0	0	0	0	0	0	0	0				0	0	-	0	0	-	0.5	0	3	0	0	4	0.5	0	5	0.05	0	6	0.7	0	7	0.1	0	8	0.18	0	9	0.02	0	10	0
20	ARC	0	0	0	0	0	0	0	0	0	0	0	0	0	0				0	0	-	0	1748.3	2	0.5	0	3	0	0	4	0.5	0	5	0.05	0	6	0.7	0	7	0.1	0	8	0.18	0	9	0.02	0	10	0
	SUB-TOTAL	6035.85	6232.1	9216	1976.73	2032.5	0	2031.5	465.75	4018	801	1134	709.98	0	0				C stands for comments (see below)
	TOTAL	12268		11192.7
	Grand TOTAL	23460.7																	Comments
	Legend																		#	Reference	Comment
	Reserves																		1	1, 2	Using the most recent BGR data instead of USGS data (as reported in GEA Table 7.11 chap.7 p. 453)
	Resources																		2	EJ	Scenario assumption: Arctic resources not available
																			3	EJ	Scenario assumption: only 50% available for Deep gas reserves
																			4	EJ	Scenario assumption: Deep gas resources not available
																			5	EJ	Scenario assumption: only 50% available for Coal-bed methane reserves
																			6	EJ	Scenario assumption: only 5% available for Coal-bed methane resources
																			7	EJ	Scenario assumption: only 70% available for Tight gas reserves
																			8	EJ	Scenario assumption: only 10% available for Tight gas resources
																			9	EJ	Scenario assumption: only 18% available for Shale gas reserves
																			10	1, 5, EJ	Scenario assumption: Maximum between GEA and ARI (Table 1-3 p. 1-5) and Expert judgement: only 10% available for Shale gas resources
																			11	EJ	Scenario assumption: Gas hydrates not available in this scenario
																			References are listed in tab 'References' - Grey cells indicate default GEA assumptions/data - EJ: Expert judgement
[truncated: 2 more columns]

## Sheet: 7. Gas - Production costs
	Gas production costs data									Assumptions
#	Reservoir type	Category	Regional distinction	Production costs ($/GJ)		# cost bins				#	Reservoir type	Category	Regional distinction	GEA extraction costs ($/GJ)		# cost bins	Cost multiplier	Cost mark-up ($/GJ)	C
				Min	Max									Min	Max
1	Conventional	Reserves	MEE, FSU	0.7	6.96	4				1	Conventional	Reserves	MEE, FSU	0.35	3.48	4	2	0	1
2		Reserves	rest	1.4	13.92	4				2		Reserves	rest	0.35	3.48	4	4	0	2
3		Resources	MEE, FSU	0.7	6.96	4				3		Resources	MEE, FSU	0.35	3.48	4	2	0	1
4		Resources	rest	1.4	13.92	4				4		Resources	rest	0.35	3.48	4	4	0	2
-	Unconventional	Reserves	all	4.05	11.1	4				-	Unconventional	Reserves	all	3	5.55	4	-	-	-
-		Resources	all	6.76	26.42	5				-		Resources	all	6.76	13.21	5	-	-	-
5	Deep Gas	Reserves	all	6	11.1	4				5	Deep Gas	Reserves	all	3	5.55	4	2	0	3
6		Resources	all	6.76	13.21	5				6		Resources	all	6.76	13.21	5	1	0	-
7	Coal-bed methane	Reserves	all	4.5	8.325	4				7	Coal-bed methane	Reserves	all	3	5.55	4	1.5	0	4
8		Resources	all	11.83	23.1175	5				8		Resources	all	6.76	13.21	5	1.75	0	5
9	Tight gas	Reserves	all	4.05	7.4925	4				9	Tight gas	Reserves	all	3	5.55	4	1.35	0	6
10		Resources	all	13.52	26.42	5				10		Resources	all	6.76	13.21	5	2	0	7
11	Shale gas	Reserves	all	4.71	8.7135	4				11	Shale gas	Reserves	all	3	5.55	4	1.57	0	8
12		Resources	all	13.9932	27.3447	5				12		Resources	all	6.76	13.21	5	2.07	0	9
13	Gas hydrates	Reserves	all	3	5.55	4				13	Gas hydrates	Reserves	all	3	5.55	4	1	0	-
14		Resources	all	6.76	13.21	5				14		Resources	all	6.76	13.21	5	1	0	-
										C stands for comments (see below)
										Comments
										#	Reference	Comment
										1	11, EJ	Scenario assumption: Increasing costs of conventional reserves by a factor of 2 in the MEE and FSU regions. This cost adjustment reflects the significant cost increase over the past decade as shown by the CERA upstream indices (+13% c/w SSP2)
										2	11, EJ	Scenario assumption: Increasing costs of conventional reserves by a factor of 2.52 in the remaining regions. This cost adjustment reflects the significant cost increase over the past decade as shown by the CERA upstream indices (+59% c/w SSP2)
										3	EJ	Scenario assumption: Increasing costs of Deep gas reserves by a factor of 2
										4	EJ	Scenario assumption: Increasing costs of Coal-bed methane reserves by 50%
										5	EJ	Scenario assumption: Increasing costs of Coal-bed methane resources by 75%
										6	EJ	Scenario assumption: Increasing costs of Tight gas reserves by 35%
										7	EJ	Scenario assumption: Increasing costs of Tight gas resources by a factor of 2
										8	12, EJ	Scenario assumption: Increasing costs of Shale gas reserves by 57%
										9	12, EJ	Scenario assumption: Increasing costs of Shale gas resources by 107%
										References are listed in tab 'References' - Grey cells indicate default GEA assumptions/data - EJ: Expert judgement

## Sheet: 8. References
	References
#	Author(s)	Organisation	Publisher	Title	Year	URL
1	Rogner H.-H. et al.	IIASA	IIASA	Global Energy Assessment - Chapter 7	2012	http://www.iiasa.ac.at/web/home/research/researchPrograms/Energy/Chapters_Home.en.html
2	BGR	BGR	BGR	Energierohstoffe 2009	2009	http://www.bgr.bund.de/DE/Themen/Energie/Produkte/energierohstoffe_2009.html
3	Bird K.J. et al.	USGS	USGS	Circum-Arctic Resource Appraisal: Estimates of Undiscovered Oil and Gas North of the Arctic Circle	2008	http://pubs.usgs.gov/fs/2008/3049/
4	Klett T.R. et al.	USGS	USGS	Assessment of Potential Additions to Conventional Oil and Gas Resources of the World (Outside the United States) from Reserve Growth	2012	http://pubs.usgs.gov/fs/2012/3052/
5	Kuuskraa V. et al.	ARI	ARI	World shale gas resources: An initial assessment of 14 regions outside the US	2011	http://www.eia.gov/analysis/studies/worldshalegas/
6	Dyni J.R.	USGS	USGS	Geology and Resources of Some World Oil-Shale Deposits	2005	http://pubs.usgs.gov/sir/2005/5294/
7	Brandt A.R.	U. of Berkley	Environ. Science & Tech.	Converting oil shale to liquid fuels: energy inputs and greenhouse fas emissions of the shell in situ conversion process	2008	http://pubs.acs.org/doi/abs/10.1021/es800531f
8	IEA	IEA	IEA	World Energy Outlook	2008	http://www.worldenergyoutlook.org/publications/2008-1994/
9	RAND	RAND	RAND		2007	www.rand.org/pubs/monographs/2005/RAND_MG414.pdf
10	Tipee B.		Oil & Gas journal	Steady growth seen for Canadian bitumen output despite increasing needs for pipeline capacity, gas	2012	http://www.ogj.com/articles/print/vol-110/issue-5/drilling-production/steady-growth-seen-for-canadian.html
11	CERA	CERA	CERA	CERA Upstream Capital and Operating costs indices	2012	http://www.ihs.com/info/cera/ihsindexes/index.aspx
12	IEA	IEA	IEA	Golden Rules for a Golden Age of Gas	2012	http://www.worldenergyoutlook.org/goldenrules/

## Sheet: 9. Definitions
	Definitions
	Reserves
	Resources
	Long-term supply cost curve
	Cumulative Extraction Cost Curve
	Cumulative Availability Curve
	Production cost
	Recovery rate
	Regions	Same as in GEA

[truncated: 1 more sheets: 10. Revision information]
