# Supplementary material for: Data on fossil fuel availability for Shared Socioeconomic Pathways
Source: Data Brief. 2016 Nov 18;10:44–6. doi: 10.1016/j.dib.2016.11.043 (PMC5137328; doi:10.1016/j.dib.2016.11.043)
Supplement: Supplementary file 8 — Supplementary material [file mmc8.xlsx]

## Sheet: 0. Information
	Scenario name	SSP2
	Date of initial assessment	2012-11-01
	Revision number	4
	Last revision date	2014-08-11
	Authors	Jerome Hilaire and Nico Bauer
	Affiliation	Potsdam Institute for Climate Impact Research
	Contacts	hilaire@pik-potsdam.de or bauer@pik-potsdam.de
	Where to find the relevant information?
	This Excel workbook contains a collection of spreadsheet that describe oil and gas data. The colour code of the list below follows that of the spreadsheet tabs. Supply cost curves are displayed in spreadsheet 1. Data are further given on 3 levels with increasing degree of information. Oil and gas data summaries provide the basic information (spreadsheet 2 and 3). Oil and gas resources and costs d…
	0. Information (this spreadsheet)
	1. Oil and gas supply-cost curves
	2. Oil data summary (vs original GEA)
	3. Gas data summary (vs original GEA)
	4. Oil resources (quantities)
	5. Oil production costs
	6. Gas resources (quantities)
	7. Gas production costs
	8. References
	9. Definitions
	10. Revision information
	How to read these data?
	Red fonts indicate a change in the data.
	Green backgrounds are used for reserves
	Orange backgrounds are used for resources
	Blue backgrounds are used for conventional resources
	Violet backgrounds are used for unconventional resources

## Sheet: 1. Supply-cost curves
	Oil and gas supply cost curves
	Oil data												Gas data
	Updated GEA (SSP2)						GEA						Updated GEA (SSP2)						GEA
	v_curSpaTyp	v_curSpaItm	v_curffTyp	v_curCost	v_curQty		$/GJ	EJ					v_curSpaTyp	v_curSpaItm	v_curffTyp	v_curCost	v_curQty		$/GJ	EJ
	region	MEE	COO-rv	1.5399	0		0.87	0					region	FSU	COG-rv	0.6195	0		0.5	0
	region	MEE	COO-rv	1.5399	1071.5		0.87	828.409					region	FSU	COG-rv	0.6195	398.021		0.5	2257.05
	region	MEE	COO-rs	1.5399	1071.5		1.0225	828.409					region	MEE	COG-rv	0.6195	398.021		1.07	2257.05
	region	MEE	COO-rs	1.5399	1076.42		1.0225	1656.82					region	MEE	COG-rv	0.6195	1095.02		1.07	5405.92
	region	MEE	COO-rv	1.80983	1076.42		1.175	1656.82					region	MEE	COG-rs	0.6195	1095.02		1.5	5405.92
	region	MEE	COO-rv	1.80983	2147.92		1.175	3313.64					region	MEE	COG-rs	0.6195	1163.91		1.5	8488.47
	region	MEE	COO-rs	1.80983	2147.92		1.48	3313.64					region	USA	COG-rv	0.882	1163.91		2	8488.47
	region	MEE	COO-rs	1.80983	2152.85		1.48	6629.93					region	USA	COG-rv	0.882	1217.15		2	10080.6
	region	MEE	COO-rv	2.07975	2152.85		2.1925	6629.93					region	CAN	COG-rv	0.882	1217.15		2.75	10080.6
	region	MEE	COO-rv	2.07975	3224.35		2.1925	8341.96					region	CAN	COG-rv	0.882	1227.96		2.75	10451.4
	region	MEE	COO-rs	2.07975	3224.35		2.965	8341.96					region	WEU	COG-rv	0.882	1227.96		3	10451.4
	region	MEE	COO-rs	2.07975	3229.27		2.965	9473.07					region	WEU	COG-rv	0.882	1268.46		3	14482.6
	region	USA	COO-rv	2.1924	3229.27		2.965	9473.07					region	EEU	COG-rv	0.882	1268.46		3.7	14482.6
	region	USA	COO-rv	2.1924	3236.57		2.965	10329.1					region	EEU	COG-rv	0.882	1273.47		3.7	19521.6
	region	NAF	COO-rv	2.1924	3236.57		3.50877	10329.1					region	NAF	COG-rv	0.882	1273.47		4.54	19521.6
	region	NAF	COO-rv	2.1924	3244.46		3.50877	11490.4					region	NAF	COG-rv	0.882	1294.19		4.54	25568.5
	region	EAF	COO-rv	2.1924	3244.46		4.38596	11490.4					region	EAF	COG-rv	0.882	1294.19		5.548	25568.5
	region	EAF	COO-rv	2.1924	3244.54		4.38596	11880.9					region	EAF	COG-rv	0.882	1294.26		5.548	30607.5
	region	WCA	COO-rv	2.1924	3244.54		4.38596	11880.9					region	WCA	COG-rv	0.882	1294.26		6.7576	30607.5
	region	WCA	COO-rv	2.1924	3290.78		4.38596	12271.5					region	WCA	COG-rv	0.882	1347.51		6.7576	32419.8
	region	SAF	COO-rv	2.1924	3290.78		5.26316	12271.5					region	SAF	COG-rv	0.882	1347.51		8.14864	32419.8
	region	SAF	COO-rv	2.1924	3295.63		5.26316	13414.8					region	SAF	COG-rv	0.882	1352.76		8.14864	34232.2
	region	IND	COO-rv	2.1924	3295.63		7.01754	13414.8					region	CHN	COG-rv	0.882	1352.76		9.67878	34232.2
	region	IND	COO-rv	2.1924	3296.23		7.01754	14186.5					region	CHN	COG-rv	0.882	1375.51		9.67878	35843.2
	region	OSA	COO-rv	2.1924	3296.23		7.01754	14186.5					region	OEA	COG-rv	0.882	1375.51		11.3619	35843.2
	region	OSA	COO-rv	2.1924	3296.26		7.01754	15373.7					region	OEA	COG-rv	0.882	1382.01		11.3619	37454.2
	region	OCN	COO-rv	2.1924	3296.26		8.77193	15373.7					region	IND	COG-rv	0.882	1382.01		13.2134	37454.2
	region	OCN	COO-rv	2.1924	3296.91		8.77193	17438.7					region	IND	COG-rv	0.882	1385.57		13.2134	43662.4
	region	PAS	COO-rv	2.1924	3296.91		8.77193	17438.7					region	OSA	COG-rv	0.882	1385.57
	region	PAS	COO-rv	2.1924	3301.62		8.77193	18856.3					region	OSA	COG-rv	0.882	1395.36
	region	LAC	COO-rv	2.1924	3301.62		10.0877	18856.3					region	JPN	COG-rv	0.882	1395.36
	region	LAC	COO-rv	2.1924	3337.57		10.0877	20281.4					region	JPN	COG-rv	0.882	1395.55
	region	MEE	COO-rv	2.34968	3337.57		12.0614	20281.4					region	OCN	COG-rv	0.882	1395.55
	region	MEE	COO-rv	2.34968	4409.07		12.0614	22874.5					region	OCN	COG-rv	0.882	1424.3
	region	MEE	COO-rs	2.34968	4409.07		14.693	22874.5					region	PAS	COG-rv	0.882	1424.3
	region	MEE	COO-rs	2.34968	4414		14.693	25971.9					region	PAS	COG-rv	0.882	1470.31
	region	USA	COO-rv	2.5767	4414		17.9825	25971.9					region	LAC	COG-rv	0.882	1470.31
	region	USA	COO-rv	2.5767	4421.29		17.9825	28098.4					region	LAC	COG-rv	0.882	1533.1
	region	NAF	COO-rv	2.5767	4421.29		21.9298	28098.4					region	WCA	COG-rs	0.882	1533.1
	region	NAF	COO-rv	2.5767	4429.18		21.9298	30236					region	WCA	COG-rs	0.882	1544.55
	region	EAF	COO-rv	2.5767	4429.18		26.2061	30236					region	SAF	COG-rs	0.882	1544.55
	region	EAF	COO-rv	2.5767	4429.26		26.2061	34125.6					region	SAF	COG-rs	0.882	1550.54
	region	WCA	COO-rv	2.5767	4429.26								region	CHN	COG-rs	0.882	1550.54
	region	WCA	COO-rv	2.5767	4475.5								region	CHN	COG-rs	0.882	1565.55
	region	SAF	COO-rv	2.5767	4475.5								region	OEA	COG-rs	0.882	1565.55
	region	SAF	COO-rv	2.5767	4480.35								region	OEA	COG-rs	0.882	1567.98
	region	IND	COO-rv	2.5767	4480.35								region	OCN	COG-rs	0.882	1567.98
	region	IND	COO-rv	2.5767	4480.95								region	OCN	COG-rs	0.882	1570.98
	region	OSA	COO-rv	2.5767	4480.95								region	FSU	COG-rv	0.889425	1570.98
	region	OSA	COO-rv	2.5767	4480.99								region	FSU	COG-rv	0.889425	1969
	region	OCN	COO-rv	2.5767	4480.99								region	MEE	COG-rv	0.889425	1969
	region	OCN	COO-rv	2.5767	4481.63								region	MEE	COG-rv	0.889425	2666
	region	PAS	COO-rv	2.5767	4481.63								region	MEE	COG-rs	0.889425	2666
	region	PAS	COO-rv	2.5767	4486.34								region	MEE	COG-rs	0.889425	2734.9
	region	LAC	COO-rv	2.5767	4486.34								region	FSU	COG-rv	1.15935	2734.9
	region	LAC	COO-rv	2.5767	4522.29								region	FSU	COG-rv	1.15935	3132.92
	region	FSU	COO-rv	2.6196	4522.29								region	MEE	COG-rv	1.15935	3132.92
	region	FSU	COO-rv	2.6196	4687.58								region	MEE	COG-rv	1.15935	3829.92
	region	MEE	COO-rs	2.6196	4687.58								region	MEE	COG-rs	1.15935	3829.92
	region	MEE	COO-rs	2.6196	4842.81								region	MEE	COG-rs	1.15935	3898.81
	region	USA	COO-rv	2.961	4842.81								region	USA	COG-rv	1.2663	3898.81
	region	USA	COO-rv	2.961	4850.11								region	USA	COG-rv	1.2663	3952.05
	region	NAF	COO-rv	2.961	4850.11								region	CAN	COG-rv	1.2663	3952.05
	region	NAF	COO-rv	2.961	4858								region	CAN	COG-rv	1.2663	3962.85
	region	EAF	COO-rv	2.961	4858								region	WEU	COG-rv	1.2663	3962.85
	region	EAF	COO-rv	2.961	4858.08								region	WEU	COG-rv	1.2663	4003.35
	region	WCA	COO-rv	2.961	4858.08								region	EEU	COG-rv	1.2663	4003.35
	region	WCA	COO-rv	2.961	4904.32								region	EEU	COG-rv	1.2663	4008.37
	region	SAF	COO-rv	2.961	4904.32								region	NAF	COG-rv	1.2663	4008.37
	region	SAF	COO-rv	2.961	4909.17								region	NAF	COG-rv	1.2663	4029.09
	region	IND	COO-rv	2.961	4909.17								region	EAF	COG-rv	1.2663	4029.09
	region	IND	COO-rv	2.961	4909.77								region	EAF	COG-rv	1.2663	4029.15
	region	OSA	COO-rv	2.961	4909.77								region	WCA	COG-rv	1.2663	4029.15
	region	OSA	COO-rv	2.961	4909.8								region	WCA	COG-rv	1.2663	4082.4
	region	OCN	COO-rv	2.961	4909.8								region	SAF	COG-rv	1.2663	4082.4
	region	OCN	COO-rv	2.961	4910.45								region	SAF	COG-rv	1.2663	4087.65
	region	PAS	COO-rv	2.961	4910.45								region	CHN	COG-rv	1.2663	4087.65
	region	PAS	COO-rv	2.961	4915.16								region	CHN	COG-rv	1.2663	4110.4
	region	LAC	COO-rv	2.961	4915.16								region	OEA	COG-rv	1.2663	4110.4
	region	LAC	COO-rv	2.961	4951.11								region	OEA	COG-rv	1.2663	4116.9
	region	FSU	COO-rv	3.03998	4951.11								region	IND	COG-rv	1.2663	4116.9
	region	FSU	COO-rv	3.03998	5116.4								region	IND	COG-rv	1.2663	4120.46
	region	MEE	COO-rs	3.03998	5116.4								region	OSA	COG-rv	1.2663	4120.46
	region	MEE	COO-rs	3.03998	5271.63								region	OSA	COG-rv	1.2663	4130.25
	region	USA	COO-rv	3.3453	5271.63								region	JPN	COG-rv	1.2663	4130.25
	region	USA	COO-rv	3.3453	5278.92								region	JPN	COG-rv	1.2663	4130.45
	region	NAF	COO-rv	3.3453	5278.92								region	OCN	COG-rv	1.2663	4130.45
	region	NAF	COO-rv	3.3453	5286.81								region	OCN	COG-rv	1.2663	4159.2
	region	EAF	COO-rv	3.3453	5286.81								region	PAS	COG-rv	1.2663	4159.2
	region	EAF	COO-rv	3.3453	5286.89								region	PAS	COG-rv	1.2663	4205.2
	region	WCA	COO-rv	3.3453	5286.89								region	LAC	COG-rv	1.2663	4205.2
	region	WCA	COO-rv	3.3453	5333.13								region	LAC	COG-rv	1.2663	4267.99
	region	SAF	COO-rv	3.3453	5333.13								region	WCA	COG-rs	1.2663	4267.99
	region	SAF	COO-rv	3.3453	5337.99								region	WCA	COG-rs	1.2663	4279.45
	region	IND	COO-rv	3.3453	5337.99								region	SAF	COG-rs	1.2663	4279.45
	region	IND	COO-rv	3.3453	5338.58								region	SAF	COG-rs	1.2663	4285.44
	region	OSA	COO-rv	3.3453	5338.58								region	CHN	COG-rs	1.2663	4285.44
	region	OSA	COO-rv	3.3453	5338.62								region	CHN	COG-rs	1.2663	4300.44
	region	OCN	COO-rv	3.3453	5338.62								region	OEA	COG-rs	1.2663	4300.44
	region	OCN	COO-rv	3.3453	5339.27								region	OEA	COG-rs	1.2663	4302.87
	region	PAS	COO-rv	3.3453	5339.27								region	OCN	COG-rs	1.2663	4302.87
	region	PAS	COO-rv	3.3453	5343.97								region	OCN	COG-rs	1.2663	4305.88
	region	LAC	COO-rv	3.3453	5343.97								region	FSU	COG-rv	1.42928	4305.88
	region	LAC	COO-rv	3.3453	5379.93								region	FSU	COG-rv	1.42928	4703.9
	region	FSU	COO-rv	3.46035	5379.93								region	MEE	COG-rv	1.42928	4703.9
	region	FSU	COO-rv	3.46035	5545.22								region	MEE	COG-rv	1.42928	5400.9
	region	MEE	COO-rs	3.46035	5545.22								region	MEE	COG-rs	1.42928	5400.9
	region	MEE	COO-rs	3.46035	5700.45								region	MEE	COG-rs	1.42928	5469.79
	region	USA	COO-rv	3.7296	5700.45								region	USA	COG-rv	1.6506	5469.79
	region	USA	COO-rv	3.7296	5733.66								region	USA	COG-rv	1.6506	5523.03
	region	CAN	COO-rv	3.7296	5733.66								region	CAN	COG-rv	1.6506	5523.03
	region	CAN	COO-rv	3.7296	5735.32								region	CAN	COG-rv	1.6506	5533.84
	region	EEU	COO-rv	3.7296	5735.32								region	WEU	COG-rv	1.6506	5533.84
	region	EEU	COO-rv	3.7296	5735.53								region	WEU	COG-rv	1.6506	5574.34
	region	NAF	COO-rv	3.7296	5735.53								region	EEU	COG-rv	1.6506	5574.34
	region	NAF	COO-rv	3.7296	5821.42								region	EEU	COG-rv	1.6506	5579.35
	region	EAF	COO-rv	3.7296	5821.42								region	NAF	COG-rv	1.6506	5579.35
	region	EAF	COO-rv	3.7296	5822.31								region	NAF	COG-rv	1.6506	5600.07
	region	WCA	COO-rv	3.7296	5822.31								region	EAF	COG-rv	1.6506	5600.07
	region	WCA	COO-rv	3.7296	5839.57								region	EAF	COG-rv	1.6506	5600.14
	region	SAF	COO-rv	3.7296	5839.57								region	WCA	COG-rv	1.6506	5600.14
	region	SAF	COO-rv	3.7296	5853.97								region	WCA	COG-rv	1.6506	5653.39
	region	CHN	COO-rv	3.7296	5853.97								region	SAF	COG-rv	1.6506	5653.39
	region	CHN	COO-rv	3.7296	5855.72								region	SAF	COG-rv	1.6506	5658.64
	region	OEA	COO-rv	3.7296	5855.72								region	CHN	COG-rv	1.6506	5658.64
	region	OEA	COO-rv	3.7296	5856.26								region	CHN	COG-rv	1.6506	5681.39
	region	IND	COO-rv	3.7296	5856.26								region	OEA	COG-rv	1.6506	5681.39
	region	IND	COO-rv	3.7296	5860.45								region	OEA	COG-rv	1.6506	5687.89
	region	OSA	COO-rv	3.7296	5860.45								region	IND	COG-rv	1.6506	5687.89
	region	OSA	COO-rv	3.7296	5860.7								region	IND	COG-rv	1.6506	5691.45
	region	OCN	COO-rv	3.7296	5860.7								region	OSA	COG-rv	1.6506	5691.45
	region	OCN	COO-rv	3.7296	5864.83								region	OSA	COG-rv	1.6506	5701.23
	region	PAS	COO-rv	3.7296	5864.83								region	JPN	COG-rv	1.6506	5701.23
	region	PAS	COO-rv	3.7296	5876.37								region	JPN	COG-rv	1.6506	5701.43
	region	LAC	COO-rv	3.7296	5876.37								region	OCN	COG-rv	1.6506	5701.43
	region	LAC	COO-rv	3.7296	5960.17								region	OCN	COG-rv	1.6506	5730.18
	region	USA	COO-rs	3.7296	5960.17								region	PAS	COG-rv	1.6506	5730.18
	region	USA	COO-rs	3.7296	5970.68								region	PAS	COG-rv	1.6506	5776.18
	region	WCA	COO-rs	3.7296	5970.68								region	LAC	COG-rv	1.6506	5776.18
	region	WCA	COO-rs	3.7296	6030.56								region	LAC	COG-rv	1.6506	5838.97
	region	SAF	COO-rs	3.7296	6030.56								region	WCA	COG-rs	1.6506	5838.97
	region	SAF	COO-rs	3.7296	6042.34								region	WCA	COG-rs	1.6506	5850.43
	region	PAS	COO-rs	3.7296	6042.34								region	SAF	COG-rs	1.6506	5850.43
	region	PAS	COO-rs	3.7296	6045.78								region	SAF	COG-rs	1.6506	5856.42
	region	LAC	COO-rs	3.7296	6045.78								region	CHN	COG-rs	1.6506	5856.42
	region	LAC	COO-rs	3.7296	6061.19								region	CHN	COG-rs	1.6506	5871.43
	region	FSU	COO-rv	3.88072	6061.19								region	OEA	COG-rs	1.6506	5871.43
	region	FSU	COO-rv	3.88072	6226.48								region	OEA	COG-rs	1.6506	5873.86
	region	MEE	COO-rs	3.88072	6226.48								region	OCN	COG-rs	1.6506	5873.86
	region	MEE	COO-rs	3.88072	6381.71								region	OCN	COG-rs	1.6506	5876.86
	region	FSU	COO-rv	4.3011	6381.71								region	FSU	COG-rv	1.6992	5876.86
	region	FSU	COO-rv	4.3011	6400.17								region	FSU	COG-rv	1.6992	6066.84
	region	FSU	COO-rs	4.3011	6400.17								region	FSU	COG-rs	1.6992	6066.84
	region	FSU	COO-rs	4.3011	6576.53								region	FSU	COG-rs	1.6992	6589.22
	region	MEE	COO-rs	4.3011	6576.53								region	MEE	COG-rs	1.6992	6589.22
	region	MEE	COO-rs	4.3011	6638.62								region	MEE	COG-rs	1.6992	6773.76
	region	USA	COO-rv	4.3281	6638.62								region	FSU	COG-rv	1.88947	6773.76
	region	USA	COO-rv	4.3281	6671.83								region	FSU	COG-rv	1.88947	6963.74
	region	CAN	COO-rv	4.3281	6671.83								region	FSU	COG-rs	1.88947	6963.74
	region	CAN	COO-rv	4.3281	6673.49								region	FSU	COG-rs	1.88947	7486.11
	region	EEU	COO-rv	4.3281	6673.49								region	MEE	COG-rs	1.88947	7486.11
	region	EEU	COO-rv	4.3281	6673.7								region	MEE	COG-rs	1.88947	7670.65
	region	NAF	COO-rv	4.3281	6673.7								region	USA	COG-rv	2.0349	7670.65
	region	NAF	COO-rv	4.3281	6759.6								region	USA	COG-rv	2.0349	7723.89
	region	EAF	COO-rv	4.3281	6759.6								region	CAN	COG-rv	2.0349	7723.89
	region	EAF	COO-rv	4.3281	6760.48								region	CAN	COG-rv	2.0349	7734.7
	region	WCA	COO-rv	4.3281	6760.48								region	WEU	COG-rv	2.0349	7734.7
	region	WCA	COO-rv	4.3281	6777.74								region	WEU	COG-rv	2.0349	7775.2
	region	SAF	COO-rv	4.3281	6777.74								region	EEU	COG-rv	2.0349	7775.2
	region	SAF	COO-rv	4.3281	6792.14								region	EEU	COG-rv	2.0349	7780.21
	region	CHN	COO-rv	4.3281	6792.14								region	NAF	COG-rv	2.0349	7780.21
	region	CHN	COO-rv	4.3281	6793.89								region	NAF	COG-rv	2.0349	7800.93
	region	OEA	COO-rv	4.3281	6793.89								region	EAF	COG-rv	2.0349	7800.93
	region	OEA	COO-rv	4.3281	6794.44								region	EAF	COG-rv	2.0349	7801
	region	IND	COO-rv	4.3281	6794.44								region	WCA	COG-rv	2.0349	7801
	region	IND	COO-rv	4.3281	6798.62								region	WCA	COG-rv	2.0349	7854.25
	region	OSA	COO-rv	4.3281	6798.62								region	SAF	COG-rv	2.0349	7854.25
	region	OSA	COO-rv	4.3281	6798.88								region	SAF	COG-rv	2.0349	7859.5
	region	OCN	COO-rv	4.3281	6798.88								region	CHN	COG-rv	2.0349	7859.5
	region	OCN	COO-rv	4.3281	6803								region	CHN	COG-rv	2.0349	7882.25
	region	PAS	COO-rv	4.3281	6803								region	OEA	COG-rv	2.0349	7882.25
	region	PAS	COO-rv	4.3281	6814.54								region	OEA	COG-rv	2.0349	7888.75
	region	LAC	COO-rv	4.3281	6814.54								region	IND	COG-rv	2.0349	7888.75
	region	LAC	COO-rv	4.3281	6898.34								region	IND	COG-rv	2.0349	7892.31
	region	USA	COO-rs	4.3281	6898.34								region	OSA	COG-rv	2.0349	7892.31
	region	USA	COO-rs	4.3281	6908.85								region	OSA	COG-rv	2.0349	7902.1
	region	WCA	COO-rs	4.3281	6908.85								region	JPN	COG-rv	2.0349	7902.1
	region	WCA	COO-rs	4.3281	6968.74								region	JPN	COG-rv	2.0349	7902.3
	region	SAF	COO-rs	4.3281	6968.74								region	OCN	COG-rv	2.0349	7902.3
	region	SAF	COO-rs	4.3281	6980.51								region	OCN	COG-rv	2.0349	7931.05
	region	PAS	COO-rs	4.3281	6980.51								region	PAS	COG-rv	2.0349	7931.05
	region	PAS	COO-rs	4.3281	6983.96								region	PAS	COG-rv	2.0349	7977.05
	region	LAC	COO-rs	4.3281	6983.96								region	LAC	COG-rv	2.0349	7977.05
	region	LAC	COO-rs	4.3281	6999.36								region	LAC	COG-rv	2.0349	8039.84
	region	FSU	COO-rv	4.77458	6999.36								region	WCA	COG-rs	2.0349	8039.84
	region	FSU	COO-rv	4.77458	7017.83								region	WCA	COG-rs	2.0349	8051.29
	region	FSU	COO-rs	4.77458	7017.83								region	SAF	COG-rs	2.0349	8051.29
	region	FSU	COO-rs	4.77458	7194.19								region	SAF	COG-rs	2.0349	8057.28
	region	MEE	COO-rs	4.77458	7194.19								region	CHN	COG-rs	2.0349	8057.28
	region	MEE	COO-rs	4.77458	7256.28								region	CHN	COG-rs	2.0349	8072.29
	region	USA	COO-rv	4.9266	7256.28								region	OEA	COG-rs	2.0349	8072.29
	region	USA	COO-rv	4.9266	7289.49								region	OEA	COG-rs	2.0349	8074.72
	region	CAN	COO-rv	4.9266	7289.49								region	OCN	COG-rs	2.0349	8074.72
	region	CAN	COO-rv	4.9266	7291.15								region	OCN	COG-rs	2.0349	8077.72
	region	EEU	COO-rv	4.9266	7291.15								region	FSU	COG-rv	2.07975	8077.72
	region	EEU	COO-rv	4.9266	7291.36								region	FSU	COG-rv	2.07975	8267.7
	region	NAF	COO-rv	4.9266	7291.36								region	FSU	COG-rs	2.07975	8267.7
	region	NAF	COO-rv	4.9266	7377.25								region	FSU	COG-rs	2.07975	8790.08
	region	EAF	COO-rv	4.9266	7377.25								region	MEE	COG-rs	2.07975	8790.08
	region	EAF	COO-rv	4.9266	7378.14								region	MEE	COG-rs	2.07975	8974.62
	region	WCA	COO-rv	4.9266	7378.14								region	FSU	COG-rv	2.27002	8974.62
	region	WCA	COO-rv	4.9266	7395.4								region	FSU	COG-rv	2.27002	9164.6
	region	SAF	COO-rv	4.9266	7395.4								region	FSU	COG-rs	2.27002	9164.6
	region	SAF	COO-rv	4.9266	7409.8								region	FSU	COG-rs	2.27002	9686.97
	region	CHN	COO-rv	4.9266	7409.8								region	MEE	COG-rs	2.27002	9686.97
	region	CHN	COO-rv	4.9266	7411.55								region	MEE	COG-rs	2.27002	9871.51
	region	OEA	COO-rv	4.9266	7411.55								region	USA	COG-rv	2.4192	9871.51
	region	OEA	COO-rv	4.9266	7412.09								region	USA	COG-rv	2.4192	9883.77
	region	IND	COO-rv	4.9266	7412.09								region	CAN	COG-rv	2.4192	9883.77
	region	IND	COO-rv	4.9266	7416.28								region	CAN	COG-rv	2.4192	9889.22
	region	OSA	COO-rv	4.9266	7416.28								region	WEU	COG-rv	2.4192	9889.22
	region	OSA	COO-rv	4.9266	7416.53								region	WEU	COG-rv	2.4192	9889.22
	region	OCN	COO-rv	4.9266	7416.53								region	EEU	COG-rv	2.4192	9889.22
	region	OCN	COO-rv	4.9266	7420.66								region	EEU	COG-rv	2.4192	9891.96
	region	PAS	COO-rv	4.9266	7420.66								region	NAF	COG-rv	2.4192	9891.96
	region	PAS	COO-rv	4.9266	7432.2								region	NAF	COG-rv	2.4192	9940.3
	region	LAC	COO-rv	4.9266	7432.2								region	EAF	COG-rv	2.4192	9940.3
	region	LAC	COO-rv	4.9266	7516								region	EAF	COG-rv	2.4192	9940.46
	region	USA	COO-rs	4.9266	7516								region	IND	COG-rv	2.4192	9940.46
	region	USA	COO-rs	4.9266	7526.51								region	IND	COG-rv	2.4192	9947.15
	region	WCA	COO-rs	4.9266	7526.51								region	OSA	COG-rv	2.4192	9947.15
	region	WCA	COO-rs	4.9266	7586.39								region	OSA	COG-rv	2.4192	9949.61
	region	SAF	COO-rs	4.9266	7586.39								region	JPN	COG-rv	2.4192	9949.61
	region	SAF	COO-rs	4.9266	7598.17								region	JPN	COG-rv	2.4192	9949.66
	region	PAS	COO-rs	4.9266	7598.17								region	PAS	COG-rv	2.4192	9949.66
	region	PAS	COO-rs	4.9266	7601.62								region	PAS	COG-rv	2.4192	9972.16
	region	LAC	COO-rs	4.9266	7601.62								region	LAC	COG-rv	2.4192	9972.16
	region	LAC	COO-rs	4.9266	7617.02								region	LAC	COG-rv	2.4192	9984.12
	region	FSU	COO-rv	5.24805	7617.02								region	USA	COG-rs	2.4192	9984.12
	region	FSU	COO-rv	5.24805	7635.48								region	USA	COG-rs	2.4192	10083.2
	region	FSU	COO-rs	5.24805	7635.48								region	CAN	COG-rs	2.4192	10083.2
	region	FSU	COO-rs	5.24805	7811.84								region	CAN	COG-rs	2.4192	10087.9
	region	MEE	COO-rs	5.24805	7811.84								region	WEU	COG-rs	2.4192	10087.9
	region	MEE	COO-rs	5.24805	7873.93								region	WEU	COG-rs	2.4192	10127
	region	USA	COO-rv	5.5251	7873.93								region	EEU	COG-rs	2.4192	10127
	region	USA	COO-rv	5.5251	7907.14								region	EEU	COG-rs	2.4192	10127.7
	region	CAN	COO-rv	5.5251	7907.14								region	WCA	COG-rs	2.4192	10127.7
	region	CAN	COO-rv	5.5251	7908.8								region	WCA	COG-rs	2.4192	10155.1
	region	EEU	COO-rv	5.5251	7908.8								region	SAF	COG-rs	2.4192	10155.1
	region	EEU	COO-rv	5.5251	7909.01								region	SAF	COG-rs	2.4192	10162.2
	region	NAF	COO-rv	5.5251	7909.01								region	CHN	COG-rs	2.4192	10162.2
	region	NAF	COO-rv	5.5251	7994.91								region	CHN	COG-rs	2.4192	10201
	region	EAF	COO-rv	5.5251	7994.91								region	OEA	COG-rs	2.4192	10201
	region	EAF	COO-rv	5.5251	7995.79								region	OEA	COG-rs	2.4192	10207.3
	region	WCA	COO-rv	5.5251	7995.79								region	IND	COG-rs	2.4192	10207.3
	region	WCA	COO-rv	5.5251	8013.06								region	IND	COG-rs	2.4192	10209.7
	region	SAF	COO-rv	5.5251	8013.06								region	OSA	COG-rs	2.4192	10209.7
	region	SAF	COO-rv	5.5251	8027.45								region	OSA	COG-rs	2.4192	10219.6
	region	CHN	COO-rv	5.5251	8027.45								region	OCN	COG-rs	2.4192	10219.6
	region	CHN	COO-rv	5.5251	8029.21								region	OCN	COG-rs	2.4192	10232
	region	OEA	COO-rv	5.5251	8029.21								region	PAS	COG-rs	2.4192	10232
	region	OEA	COO-rv	5.5251	8029.75								region	PAS	COG-rs	2.4192	10266.8
	region	IND	COO-rv	5.5251	8029.75								region	LAC	COG-rs	2.4192	10266.8
	region	IND	COO-rv	5.5251	8033.93								region	LAC	COG-rs	2.4192	10307.9
	region	OSA	COO-rv	5.5251	8033.93								region	FSU	COG-rs	2.4603	10307.9
	region	OSA	COO-rv	5.5251	8034.19								region	FSU	COG-rs	2.4603	10644.2
	region	OCN	COO-rv	5.5251	8034.19								region	MEE	COG-rs	2.4603	10644.2
	region	OCN	COO-rv	5.5251	8038.31								region	MEE	COG-rs	2.4603	10718
	region	PAS	COO-rv	5.5251	8038.31								region	USA	COG-rv	2.6901	10718
	region	PAS	COO-rv	5.5251	8049.86								region	USA	COG-rv	2.6901	10730.3
	region	LAC	COO-rv	5.5251	8049.86								region	CAN	COG-rv	2.6901	10730.3
	region	LAC	COO-rv	5.5251	8133.65								region	CAN	COG-rv	2.6901	10735.8
	region	USA	COO-rs	5.5251	8133.65								region	WEU	COG-rv	2.6901	10735.8
	region	USA	COO-rs	5.5251	8144.16								region	WEU	COG-rv	2.6901	10735.8
	region	WCA	COO-rs	5.5251	8144.16								region	EEU	COG-rv	2.6901	10735.8
	region	WCA	COO-rs	5.5251	8204.05								region	EEU	COG-rv	2.6901	10738.5
	region	SAF	COO-rs	5.5251	8204.05								region	NAF	COG-rv	2.6901	10738.5
	region	SAF	COO-rs	5.5251	8215.82								region	NAF	COG-rv	2.6901	10786.8
	region	PAS	COO-rs	5.5251	8215.82								region	EAF	COG-rv	2.6901	10786.8
	region	PAS	COO-rs	5.5251	8219.27								region	EAF	COG-rv	2.6901	10787
	region	LAC	COO-rs	5.5251	8219.27								region	IND	COG-rv	2.6901	10787
	region	LAC	COO-rs	5.5251	8234.67								region	IND	COG-rv	2.6901	10793.7
	region	FSU	COO-rv	5.72152	8234.67								region	OSA	COG-rv	2.6901	10793.7
	region	FSU	COO-rv	5.72152	8253.14								region	OSA	COG-rv	2.6901	10796.1
	region	FSU	COO-rs	5.72152	8253.14								region	JPN	COG-rv	2.6901	10796.1
	region	FSU	COO-rs	5.72152	8429.5								region	JPN	COG-rv	2.6901	10796.2
	region	MEE	COO-rs	5.72152	8429.5								region	PAS	COG-rv	2.6901	10796.2
	region	MEE	COO-rs	5.72152	8491.59								region	PAS	COG-rv	2.6901	10818.7
	region	CAN	COO-rv	6.1236	8491.59								region	LAC	COG-rv	2.6901	10818.7
	region	CAN	COO-rv	6.1236	8496.93								region	LAC	COG-rv	2.6901	10830.7
	region	WEU	COO-rv	6.1236	8496.93								region	USA	COG-rs	2.6901	10830.7
	region	WEU	COO-rv	6.1236	8518.93								region	USA	COG-rs	2.6901	10929.8
	region	EEU	COO-rv	6.1236	8518.93								region	CAN	COG-rs	2.6901	10929.8
	region	EEU	COO-rv	6.1236	8520.22								region	CAN	COG-rs	2.6901	10934.5
	region	NAF	COO-rv	6.1236	8520.22								region	WEU	COG-rs	2.6901	10934.5
	region	NAF	COO-rv	6.1236	8523.43								region	WEU	COG-rs	2.6901	10973.6
	region	EAF	COO-rv	6.1236	8523.43								region	EEU	COG-rs	2.6901	10973.6
	region	EAF	COO-rv	6.1236	8523.46								region	EEU	COG-rs	2.6901	10974.2
	region	CHN	COO-rv	6.1236	8523.46								region	WCA	COG-rs	2.6901	10974.2
	region	CHN	COO-rv	6.1236	8542.71								region	WCA	COG-rs	2.6901	11001.7
	region	OEA	COO-rv	6.1236	8542.71								region	SAF	COG-rs	2.6901	11001.7
	region	OEA	COO-rv	6.1236	8548.67								region	SAF	COG-rs	2.6901	11008.8
	region	IND	COO-rv	6.1236	8548.67								region	CHN	COG-rs	2.6901	11008.8
	region	IND	COO-rv	6.1236	8552.13								region	CHN	COG-rs	2.6901	11047.5
	region	OSA	COO-rv	6.1236	8552.13								region	OEA	COG-rs	2.6901	11047.5
	region	OSA	COO-rv	6.1236	8552.34								region	OEA	COG-rs	2.6901	11053.8
	region	OCN	COO-rv	6.1236	8552.34								region	IND	COG-rs	2.6901	11053.8
	region	OCN	COO-rv	6.1236	8553.57								region	IND	COG-rs	2.6901	11056.2
	region	USA	COO-rs	6.1236	8553.57								region	OSA	COG-rs	2.6901	11056.2
	region	USA	COO-rs	6.1236	8618.99								region	OSA	COG-rs	2.6901	11066.2
	region	CAN	COO-rs	6.1236	8618.99								region	OCN	COG-rs	2.6901	11066.2
	region	CAN	COO-rs	6.1236	8620.25								region	OCN	COG-rs	2.6901	11078.5
	region	WEU	COO-rs	6.1236	8620.25								region	PAS	COG-rs	2.6901	11078.5
	region	WEU	COO-rs	6.1236	8641.39								region	PAS	COG-rs	2.6901	11113.3
	region	EEU	COO-rs	6.1236	8641.39								region	LAC	COG-rs	2.6901	11113.3
	region	EEU	COO-rs	6.1236	8641.79								region	LAC	COG-rs	2.6901	11154.4
	region	NAF	COO-rs	6.1236	8641.79								region	FSU	COG-rs	2.95147	11154.4
	region	NAF	COO-rs	6.1236	8681.82								region	FSU	COG-rs	2.95147	11490.8
	region	EAF	COO-rs	6.1236	8681.82								region	MEE	COG-rs	2.95147	11490.8
	region	EAF	COO-rs	6.1236	8684.65								region	MEE	COG-rs	2.95147	11564.6
	region	WCA	COO-rs	6.1236	8684.65								region	USA	COG-rv	2.961	11564.6
	region	WCA	COO-rs	6.1236	8695.06								region	USA	COG-rv	2.961	11576.8
	region	SAF	COO-rs	6.1236	8695.06								region	CAN	COG-rv	2.961	11576.8
	region	SAF	COO-rs	6.1236	8718.45								region	CAN	COG-rv	2.961	11582.3
	region	CHN	COO-rs	6.1236	8718.45								region	WEU	COG-rv	2.961	11582.3
	region	CHN	COO-rs	6.1236	8724.55								region	WEU	COG-rv	2.961	11582.3
	region	OEA	COO-rs	6.1236	8724.55								region	EEU	COG-rv	2.961	11582.3
	region	OEA	COO-rs	6.1236	8726.56								region	EEU	COG-rv	2.961	11585
	region	IND	COO-rs	6.1236	8726.56								region	NAF	COG-rv	2.961	11585
	region	IND	COO-rs	6.1236	8730.13								region	NAF	COG-rv	2.961	11633.4
	region	OSA	COO-rs	6.1236	8730.13								region	EAF	COG-rv	2.961	11633.4
	region	OSA	COO-rs	6.1236	8732.86								region	EAF	COG-rv	2.961	11633.5
	region	OCN	COO-rs	6.1236	8732.86								region	IND	COG-rv	2.961	11633.5
	region	OCN	COO-rs	6.1236	8742.83								region	IND	COG-rv	2.961	11640.2
	region	PAS	COO-rs	6.1236	8742.83								region	OSA	COG-rv	2.961	11640.2
	region	PAS	COO-rs	6.1236	8759.15								region	OSA	COG-rv	2.961	11642.7
	region	LAC	COO-rs	6.1236	8759.15								region	JPN	COG-rv	2.961	11642.7
	region	LAC	COO-rs	6.1236	8874.23								region	JPN	COG-rv	2.961	11642.7
	region	ARC	COO-rs	6.1236	8874.23								region	PAS	COG-rv	2.961	11642.7
	region	ARC	COO-rs	6.1236	8898.23								region	PAS	COG-rv	2.961	11665.2
	region	FSU	COO-rs	6.195	8898.23								region	LAC	COG-rv	2.961	11665.2
	region	FSU	COO-rs	6.195	8973.86								region	LAC	COG-rv	2.961	11677.2
	region	CAN	COO-rv	6.7977	8973.86								region	USA	COG-rs	2.961	11677.2
	region	CAN	COO-rv	6.7977	8979.2								region	USA	COG-rs	2.961	11776.3
	region	WEU	COO-rv	6.7977	8979.2								region	CAN	COG-rs	2.961	11776.3
	region	WEU	COO-rv	6.7977	9001.2								region	CAN	COG-rs	2.961	11781
	region	EEU	COO-rv	6.7977	9001.2								region	WEU	COG-rs	2.961	11781
	region	EEU	COO-rv	6.7977	9002.49								region	WEU	COG-rs	2.961	11820.1
	region	NAF	COO-rv	6.7977	9002.49								region	EEU	COG-rs	2.961	11820.1
	region	NAF	COO-rv	6.7977	9005.71								region	EEU	COG-rs	2.961	11820.8
	region	EAF	COO-rv	6.7977	9005.71								region	WCA	COG-rs	2.961	11820.8
	region	EAF	COO-rv	6.7977	9005.74								region	WCA	COG-rs	2.961	11848.2
	region	CHN	COO-rv	6.7977	9005.74								region	SAF	COG-rs	2.961	11848.2
	region	CHN	COO-rv	6.7977	9024.99								region	SAF	COG-rs	2.961	11855.3
	region	OEA	COO-rv	6.7977	9024.99								region	CHN	COG-rs	2.961	11855.3
	region	OEA	COO-rv	6.7977	9030.95								region	CHN	COG-rs	2.961	11894
	region	IND	COO-rv	6.7977	9030.95								region	OEA	COG-rs	2.961	11894
	region	IND	COO-rv	6.7977	9034.41								region	OEA	COG-rs	2.961	11900.3
	region	OSA	COO-rv	6.7977	9034.41								region	IND	COG-rs	2.961	11900.3
	region	OSA	COO-rv	6.7977	9034.62								region	IND	COG-rs	2.961	11902.8
	region	OCN	COO-rv	6.7977	9034.62								region	OSA	COG-rs	2.961	11902.8
	region	OCN	COO-rv	6.7977	9035.85								region	OSA	COG-rs	2.961	11912.7
	region	USA	COO-rs	6.7977	9035.85								region	OCN	COG-rs	2.961	11912.7
	region	USA	COO-rs	6.7977	9101.27								region	OCN	COG-rs	2.961	11925.1
	region	CAN	COO-rs	6.7977	9101.27								region	PAS	COG-rs	2.961	11925.1
	region	CAN	COO-rs	6.7977	9102.53								region	PAS	COG-rs	2.961	11959.9
	region	WEU	COO-rs	6.7977	9102.53								region	LAC	COG-rs	2.961	11959.9
	region	WEU	COO-rs	6.7977	9123.66								region	LAC	COG-rs	2.961	12000.9
	region	EEU	COO-rs	6.7977	9123.66								region	USA	COG-rv	3.2319	12000.9
	region	EEU	COO-rs	6.7977	9124.07								region	USA	COG-rv	3.2319	12013.2
	region	NAF	COO-rs	6.7977	9124.07								region	CAN	COG-rv	3.2319	12013.2
	region	NAF	COO-rs	6.7977	9164.1								region	CAN	COG-rv	3.2319	12018.6
	region	EAF	COO-rs	6.7977	9164.1								region	WEU	COG-rv	3.2319	12018.6
	region	EAF	COO-rs	6.7977	9166.93								region	WEU	COG-rv	3.2319	12018.6
	region	WCA	COO-rs	6.7977	9166.93								region	EEU	COG-rv	3.2319	12018.6
	region	WCA	COO-rs	6.7977	9177.34								region	EEU	COG-rv	3.2319	12021.4
	region	SAF	COO-rs	6.7977	9177.34								region	NAF	COG-rv	3.2319	12021.4
	region	SAF	COO-rs	6.7977	9200.73								region	NAF	COG-rv	3.2319	12069.7
	region	CHN	COO-rs	6.7977	9200.73								region	EAF	COG-rv	3.2319	12069.7
	region	CHN	COO-rs	6.7977	9206.83								region	EAF	COG-rv	3.2319	12069.9
	region	OEA	COO-rs	6.7977	9206.83								region	IND	COG-rv	3.2319	12069.9
	region	OEA	COO-rs	6.7977	9208.84								region	IND	COG-rv	3.2319	12076.6
	region	IND	COO-rs	6.7977	9208.84								region	OSA	COG-rv	3.2319	12076.6
	region	IND	COO-rs	6.7977	9212.41								region	OSA	COG-rv	3.2319	12079
	region	OSA	COO-rs	6.7977	9212.41								region	JPN	COG-rv	3.2319	12079
	region	OSA	COO-rs	6.7977	9215.13								region	JPN	COG-rv	3.2319	12079.1
	region	OCN	COO-rs	6.7977	9215.13								region	PAS	COG-rv	3.2319	12079.1
	region	OCN	COO-rs	6.7977	9225.1								region	PAS	COG-rv	3.2319	12101.6
	region	PAS	COO-rs	6.7977	9225.1								region	LAC	COG-rv	3.2319	12101.6
	region	PAS	COO-rs	6.7977	9241.43								region	LAC	COG-rv	3.2319	12113.5
	region	LAC	COO-rs	6.7977	9241.43								region	USA	COG-rs	3.2319	12113.5
	region	LAC	COO-rs	6.7977	9356.51								region	USA	COG-rs	3.2319	12212.7
	region	ARC	COO-rs	6.7977	9356.51								region	CAN	COG-rs	3.2319	12212.7
	region	ARC	COO-rs	6.7977	9380.5								region	CAN	COG-rs	3.2319	12217.3
	region	USA	EHO-rv	6.94372	9380.5								region	WEU	COG-rs	3.2319	12217.3
	region	USA	EHO-rv	6.94372	9384.89								region	WEU	COG-rs	3.2319	12256.5
	region	CAN	EHO-rv	6.94372	9384.89								region	EEU	COG-rs	3.2319	12256.5
	region	CAN	EHO-rv	6.94372	9384.9								region	EEU	COG-rs	3.2319	12257.1
	region	WEU	EHO-rv	6.94372	9384.9								region	WCA	COG-rs	3.2319	12257.1
	region	WEU	EHO-rv	6.94372	9384.93								region	WCA	COG-rs	3.2319	12284.6
	region	EEU	EHO-rv	6.94372	9384.93								region	SAF	COG-rs	3.2319	12284.6
	region	EEU	EHO-rv	6.94372	9384.94								region	SAF	COG-rs	3.2319	12291.6
	region	FSU	EHO-rv	6.94372	9384.94								region	CHN	COG-rs	3.2319	12291.6
	region	FSU	EHO-rv	6.94372	9385.01								region	CHN	COG-rs	3.2319	12330.4
	region	NAF	EHO-rv	6.94372	9385.01								region	OEA	COG-rs	3.2319	12330.4
	region	NAF	EHO-rv	6.94372	9385.04								region	OEA	COG-rs	3.2319	12336.7
	region	MEE	EHO-rv	6.94372	9385.04								region	IND	COG-rs	3.2319	12336.7
	region	MEE	EHO-rv	6.94372	9385.05								region	IND	COG-rs	3.2319	12339.1
	region	CHN	EHO-rv	6.94372	9385.05								region	OSA	COG-rs	3.2319	12339.1
	region	CHN	EHO-rv	6.94372	9385.55								region	OSA	COG-rs	3.2319	12349
	region	LAC	EHO-rv	6.94372	9385.55								region	OCN	COG-rs	3.2319	12349
	region	LAC	EHO-rv	6.94372	9407.73								region	OCN	COG-rs	3.2319	12361.4
	region	CAN	TAO-rv	6.94372	9407.73								region	PAS	COG-rs	3.2319	12361.4
	region	CAN	TAO-rv	6.94372	9483.58								region	PAS	COG-rs	3.2319	12396.2
	region	WEU	TAO-rv	6.94372	9483.58								region	LAC	COG-rs	3.2319	12396.2
	region	WEU	TAO-rv	6.94372	9483.63								region	LAC	COG-rs	3.2319	12437.3
	region	FSU	TAO-rv	6.94372	9483.63								region	FSU	COG-rs	3.44265	12437.3
	region	FSU	TAO-rv	6.94372	9545.35								region	FSU	COG-rs	3.44265	12773.6
	region	WCA	TAO-rv	6.94372	9545.35								region	MEE	COG-rs	3.44265	12773.6
	region	WCA	TAO-rv	6.94372	9545.75								region	MEE	COG-rs	3.44265	12847.5
	region	SAF	TAO-rv	6.94372	9545.75								region	USA	CMG-rv	3.45	12847.5
	region	SAF	TAO-rv	6.94372	9546.06								region	USA	CMG-rv	3.45	12996.4
	region	PAS	TAO-rv	6.94372	9546.06								region	CAN	CMG-rv	3.45	12996.4
	region	PAS	TAO-rv	6.94372	9546.21								region	CAN	CMG-rv	3.45	13038.2
	region	USA	SHO-rv	6.94372	9546.21								region	WEU	CMG-rv	3.45	13038.2
	region	USA	SHO-rv	6.94372	9636.57								region	WEU	CMG-rv	3.45	13079.9
	region	WEU	SHO-rv	6.94372	9636.57								region	EEU	CMG-rv	3.45	13079.9
	region	WEU	SHO-rv	6.94372	9636.75								region	EEU	CMG-rv	3.45	13091.9
	region	EEU	SHO-rv	6.94372	9636.75								region	FSU	CMG-rv	3.45	13091.9
	region	EEU	SHO-rv	6.94372	9636.76								region	FSU	CMG-rv	3.45	13211.1
	region	FSU	SHO-rv	6.94372	9636.76								region	NAF	CMG-rv	3.45	13211.1
	region	FSU	SHO-rv	6.94372	9637.6								region	NAF	CMG-rv	3.45	13235
	region	NAF	SHO-rv	6.94372	9637.6								region	EAF	CMG-rv	3.45	13235
	region	NAF	SHO-rv	6.94372	9638.22								region	EAF	CMG-rv	3.45	13247
	region	MEE	SHO-rv	6.94372	9638.22								region	WCA	CMG-rv	3.45	13247
	region	MEE	SHO-rv	6.94372	9651.9								region	WCA	CMG-rv	3.45	13259
	region	CHN	SHO-rv	6.94372	9651.9								region	SAF	CMG-rv	3.45	13259
	region	CHN	SHO-rv	6.94372	9652.69								region	SAF	CMG-rv	3.45	13271
	region	OCN	SHO-rv	6.94372	9652.69								region	MEE	CMG-rv	3.45	13271
	region	OCN	SHO-rv	6.94372	9653.76								region	MEE	CMG-rv	3.45	13283
	region	PAS	SHO-rv	6.94372	9653.76								region	CHN	CMG-rv	3.45	13283
	region	PAS	SHO-rv	6.94372	9654.27								region	CHN	CMG-rv	3.45	13372.4
	region	LAC	SHO-rv	6.94372	9654.27								region	IND	CMG-rv	3.45	13372.4
	region	LAC	SHO-rv	6.94372	9654.73								region	IND	CMG-rv	3.45	13414.2
	region	FSU	COO-rs	6.95168	9654.73								region	OSA	CMG-rv	3.45	13414.2
	region	FSU	COO-rs	6.95168	9730.37								region	OSA	CMG-rv	3.45	13420.1
	region	CAN	COO-rv	7.4718	9730.37								region	JPN	CMG-rv	3.45	13420.1
	region	CAN	COO-rv	7.4718	9735.71								region	JPN	CMG-rv	3.45	13426
	region	WEU	COO-rv	7.4718	9735.71								region	OCN	CMG-rv	3.45	13426
	region	WEU	COO-rv	7.4718	9757.71								region	OCN	CMG-rv	3.45	13455.8
	region	EEU	COO-rv	7.4718	9757.71								region	PAS	CMG-rv	3.45	13455.8
	region	EEU	COO-rv	7.4718	9759								region	PAS	CMG-rv	3.45	13461.7
	region	NAF	COO-rv	7.4718	9759								region	LAC	CMG-rv	3.45	13461.7
	region	NAF	COO-rv	7.4718	9762.21								region	LAC	CMG-rv	3.45	13497.5
	region	EAF	COO-rv	7.4718	9762.21								region	USA	TIG-rv	3.45	13497.5
	region	EAF	COO-rv	7.4718	9762.25								region	USA	TIG-rv	3.45	13676.4
	region	CHN	COO-rv	7.4718	9762.25								region	CAN	TIG-rv	3.45	13676.4
	region	CHN	COO-rv	7.4718	9781.49								region	CAN	TIG-rv	3.45	13765.9
	region	OEA	COO-rv	7.4718	9781.49								region	WEU	TIG-rv	3.45	13765.9
	region	OEA	COO-rv	7.4718	9787.45								region	WEU	TIG-rv	3.45	13789.7
	region	IND	COO-rv	7.4718	9787.45								region	EEU	TIG-rv	3.45	13789.7
	region	IND	COO-rv	7.4718	9790.92								region	EEU	TIG-rv	3.45	13813.5
	region	OSA	COO-rv	7.4718	9790.92								region	FSU	TIG-rv	3.45	13813.5
	region	OSA	COO-rv	7.4718	9791.13								region	FSU	TIG-rv	3.45	13980.4
	region	OCN	COO-rv	7.4718	9791.13								region	NAF	TIG-rv	3.45	13980.4
	region	OCN	COO-rv	7.4718	9792.35								region	NAF	TIG-rv	3.45	14028.1
	region	USA	COO-rs	7.4718	9792.35								region	EAF	TIG-rv	3.45	14028.1
	region	USA	COO-rs	7.4718	9857.77								region	EAF	TIG-rv	3.45	14051.9
	region	CAN	COO-rs	7.4718	9857.77								region	WCA	TIG-rv	3.45	14051.9
	region	CAN	COO-rs	7.4718	9859.03								region	WCA	TIG-rv	3.45	14123.5
	region	WEU	COO-rs	7.4718	9859.03								region	SAF	TIG-rv	3.45	14123.5
	region	WEU	COO-rs	7.4718	9880.17								region	SAF	TIG-rv	3.45	14141.4
	region	EEU	COO-rs	7.4718	9880.17								region	MEE	TIG-rv	3.45	14141.4
	region	EEU	COO-rs	7.4718	9880.57								region	MEE	TIG-rv	3.45	14230.8
	region	NAF	COO-rs	7.4718	9880.57								region	CHN	TIG-rv	3.45	14230.8
	region	NAF	COO-rs	7.4718	9920.61								region	CHN	TIG-rv	3.45	14248.7
	region	EAF	COO-rs	7.4718	9920.61								region	OEA	TIG-rv	3.45	14248.7
	region	EAF	COO-rs	7.4718	9923.43								region	OEA	TIG-rv	3.45	14266.7
	region	WCA	COO-rs	7.4718	9923.43								region	IND	TIG-rv	3.45	14266.7
	region	WCA	COO-rs	7.4718	9933.84								region	IND	TIG-rv	3.45	14284.6
	region	SAF	COO-rs	7.4718	9933.84								region	OSA	TIG-rv	3.45	14284.6
	region	SAF	COO-rs	7.4718	9957.23								region	OSA	TIG-rv	3.45	14320.4
	region	CHN	COO-rs	7.4718	9957.23								region	OCN	TIG-rv	3.45	14320.4
	region	CHN	COO-rs	7.4718	9963.33								region	OCN	TIG-rv	3.45	14344.3
	region	OEA	COO-rs	7.4718	9963.33								region	PAS	TIG-rv	3.45	14344.3
	region	OEA	COO-rs	7.4718	9965.34								region	PAS	TIG-rv	3.45	14380.1
	region	IND	COO-rs	7.4718	9965.34								region	LAC	TIG-rv	3.45	14380.1
	region	IND	COO-rs	7.4718	9968.91								region	LAC	TIG-rv	3.45	14415.9
	region	OSA	COO-rs	7.4718	9968.91								region	NAF	COG-rv	3.5028	14415.9
	region	OSA	COO-rs	7.4718	9971.64								region	NAF	COG-rv	3.5028	14424.4
	region	OCN	COO-rs	7.4718	9971.64								region	EAF	COG-rv	3.5028	14424.4
	region	OCN	COO-rs	7.4718	9981.61								region	EAF	COG-rv	3.5028	14424.4
	region	PAS	COO-rs	7.4718	9981.61								region	USA	COG-rs	3.5028	14424.4
	region	PAS	COO-rs	7.4718	9997.93								region	USA	COG-rs	3.5028	14485.7
	region	LAC	COO-rs	7.4718	9997.93								region	CAN	COG-rs	3.5028	14485.7
	region	LAC	COO-rs	7.4718	10113								region	CAN	COG-rs	3.5028	14515.8
	region	ARC	COO-rs	7.4718	10113								region	WEU	COG-rs	3.5028	14515.8
	region	ARC	COO-rs	7.4718	10137								region	WEU	COG-rs	3.5028	14535.3
	region	FSU	COO-rs	7.70835	10137								region	EEU	COG-rs	3.5028	14535.3
	region	FSU	COO-rs	7.70835	10212.6								region	EEU	COG-rs	3.5028	14538
	region	CAN	COO-rv	8.1459	10212.6								region	NAF	COG-rs	3.5028	14538
	region	CAN	COO-rv	8.1459	10218								region	NAF	COG-rs	3.5028	14594.2
	region	WEU	COO-rv	8.1459	10218								region	EAF	COG-rs	3.5028	14594.2
	region	WEU	COO-rv	8.1459	10240								region	EAF	COG-rs	3.5028	14598
	region	EEU	COO-rv	8.1459	10240								region	WCA	COG-rs	3.5028	14598
	region	EEU	COO-rv	8.1459	10241.3								region	WCA	COG-rs	3.5028	14604.8
	region	NAF	COO-rv	8.1459	10241.3								region	SAF	COG-rs	3.5028	14604.8
	region	NAF	COO-rv	8.1459	10244.5								region	SAF	COG-rs	3.5028	14608.2
	region	EAF	COO-rv	8.1459	10244.5								region	CHN	COG-rs	3.5028	14608.2
	region	EAF	COO-rv	8.1459	10244.5								region	CHN	COG-rs	3.5028	14627.5
	region	CHN	COO-rv	8.1459	10244.5								region	OEA	COG-rs	3.5028	14627.5
	region	CHN	COO-rv	8.1459	10263.8								region	OEA	COG-rs	3.5028	14630.7
	region	OEA	COO-rv	8.1459	10263.8								region	IND	COG-rs	3.5028	14630.7
	region	OEA	COO-rv	8.1459	10269.7								region	IND	COG-rs	3.5028	14634.3
	region	IND	COO-rv	8.1459	10269.7								region	OSA	COG-rs	3.5028	14634.3
	region	IND	COO-rv	8.1459	10273.2								region	OSA	COG-rs	3.5028	14641.7
	region	OSA	COO-rv	8.1459	10273.2								region	OCN	COG-rs	3.5028	14641.7
	region	OSA	COO-rv	8.1459	10273.4								region	OCN	COG-rs	3.5028	14645.8
	region	OCN	COO-rv	8.1459	10273.4								region	PAS	COG-rs	3.5028	14645.8
	region	OCN	COO-rv	8.1459	10274.6								region	PAS	COG-rs	3.5028	14680.1
	region	USA	COO-rs	8.1459	10274.6								region	LAC	COG-rs	3.5028	14680.1
	region	USA	COO-rs	8.1459	10340								region	LAC	COG-rs	3.5028	14717.3
	region	CAN	COO-rs	8.1459	10340								region	ARC	COG-rs	3.5028	14717.3
	region	CAN	COO-rs	8.1459	10341.3								region	ARC	COG-rs	3.5028	14771.9
	region	WEU	COO-rs	8.1459	10341.3								region	FSU	COG-rs	3.93383	14771.9
	region	WEU	COO-rs	8.1459	10362.4								region	FSU	COG-rs	3.93383	15108.3
	region	EEU	COO-rs	8.1459	10362.4								region	MEE	COG-rs	3.93383	15108.3
	region	EEU	COO-rs	8.1459	10362.8								region	MEE	COG-rs	3.93383	15182.1
	region	NAF	COO-rs	8.1459	10362.8								region	NAF	COG-rv	4.2021	15182.1
	region	NAF	COO-rs	8.1459	10402.9								region	NAF	COG-rv	4.2021	15190.6
	region	EAF	COO-rs	8.1459	10402.9								region	EAF	COG-rv	4.2021	15190.6
	region	EAF	COO-rs	8.1459	10405.7								region	EAF	COG-rv	4.2021	15190.6
	region	WCA	COO-rs	8.1459	10405.7								region	USA	COG-rs	4.2021	15190.6
	region	WCA	COO-rs	8.1459	10416.1								region	USA	COG-rs	4.2021	15251.9
	region	SAF	COO-rs	8.1459	10416.1								region	CAN	COG-rs	4.2021	15251.9
	region	SAF	COO-rs	8.1459	10439.5								region	CAN	COG-rs	4.2021	15282
	region	CHN	COO-rs	8.1459	10439.5								region	WEU	COG-rs	4.2021	15282
	region	CHN	COO-rs	8.1459	10445.6								region	WEU	COG-rs	4.2021	15301.5
	region	OEA	COO-rs	8.1459	10445.6								region	EEU	COG-rs	4.2021	15301.5
	region	OEA	COO-rs	8.1459	10447.6								region	EEU	COG-rs	4.2021	15304.1
	region	IND	COO-rs	8.1459	10447.6								region	NAF	COG-rs	4.2021	15304.1
	region	IND	COO-rs	8.1459	10451.2								region	NAF	COG-rs	4.2021	15360.4
	region	OSA	COO-rs	8.1459	10451.2								region	EAF	COG-rs	4.2021	15360.4
	region	OSA	COO-rs	8.1459	10453.9								region	EAF	COG-rs	4.2021	15364.2
	region	OCN	COO-rs	8.1459	10453.9								region	WCA	COG-rs	4.2021	15364.2
	region	OCN	COO-rs	8.1459	10463.9								region	WCA	COG-rs	4.2021	15371
	region	PAS	COO-rs	8.1459	10463.9								region	SAF	COG-rs	4.2021	15371
	region	PAS	COO-rs	8.1459	10480.2								region	SAF	COG-rs	4.2021	15374.4
	region	LAC	COO-rs	8.1459	10480.2								region	CHN	COG-rs	4.2021	15374.4
	region	LAC	COO-rs	8.1459	10595.3								region	CHN	COG-rs	4.2021	15393.7
	region	ARC	COO-rs	8.1459	10595.3								region	OEA	COG-rs	4.2021	15393.7
	region	ARC	COO-rs	8.1459	10619.3								region	OEA	COG-rs	4.2021	15396.9
	region	FSU	COO-rs	8.46502	10619.3								region	IND	COG-rs	4.2021	15396.9
	region	FSU	COO-rs	8.46502	10694.9								region	IND	COG-rs	4.2021	15400.5
	region	USA	EHO-rv	8.68056	10694.9								region	OSA	COG-rs	4.2021	15400.5
	region	USA	EHO-rv	8.68056	10701.5								region	OSA	COG-rs	4.2021	15407.9
	region	CAN	EHO-rv	8.68056	10701.5								region	OCN	COG-rs	4.2021	15407.9
	region	CAN	EHO-rv	8.68056	10701.5								region	OCN	COG-rs	4.2021	15412
	region	WEU	EHO-rv	8.68056	10701.5								region	PAS	COG-rs	4.2021	15412
	region	WEU	EHO-rv	8.68056	10701.6								region	PAS	COG-rs	4.2021	15446.3
	region	EEU	EHO-rv	8.68056	10701.6								region	LAC	COG-rs	4.2021	15446.3
	region	EEU	EHO-rv	8.68056	10701.6								region	LAC	COG-rs	4.2021	15483.5
	region	FSU	EHO-rv	8.68056	10701.6								region	ARC	COG-rs	4.2021	15483.5
	region	FSU	EHO-rv	8.68056	10701.7								region	ARC	COG-rs	4.2021	15538.1
	region	NAF	EHO-rv	8.68056	10701.7								region	USA	CMG-rv	4.255	15538.1
	region	NAF	EHO-rv	8.68056	10701.8								region	USA	CMG-rv	4.255	15724.3
	region	MEE	EHO-rv	8.68056	10701.8								region	CAN	CMG-rv	4.255	15724.3
	region	MEE	EHO-rv	8.68056	10701.8								region	CAN	CMG-rv	4.255	15776.5
	region	CHN	EHO-rv	8.68056	10701.8								region	WEU	CMG-rv	4.255	15776.5
	region	CHN	EHO-rv	8.68056	10702.3								region	WEU	CMG-rv	4.255	15828.7
	region	LAC	EHO-rv	8.68056	10702.3								region	EEU	CMG-rv	4.255	15828.7
	region	LAC	EHO-rv	8.68056	10737.8								region	EEU	CMG-rv	4.255	15843.7
	region	CAN	TAO-rv	8.68056	10737.8								region	FSU	CMG-rv	4.255	15843.7
	region	CAN	TAO-rv	8.68056	10851.5								region	FSU	CMG-rv	4.255	15992.7
	region	WEU	TAO-rv	8.68056	10851.5								region	NAF	CMG-rv	4.255	15992.7
	region	WEU	TAO-rv	8.68056	10851.6								region	NAF	CMG-rv	4.255	16022.5
	region	FSU	TAO-rv	8.68056	10851.6								region	EAF	CMG-rv	4.255	16022.5
	region	FSU	TAO-rv	8.68056	10925.7								region	EAF	CMG-rv	4.255	16037.5
	region	EAF	TAO-rv	8.68056	10925.7								region	WCA	CMG-rv	4.255	16037.5
	region	EAF	TAO-rv	8.68056	10925.8								region	WCA	CMG-rv	4.255	16052.5
	region	WCA	TAO-rv	8.68056	10925.8								region	SAF	CMG-rv	4.255	16052.5
	region	WCA	TAO-rv	8.68056	10926.2								region	SAF	CMG-rv	4.255	16067.5
	region	SAF	TAO-rv	8.68056	10926.2								region	MEE	CMG-rv	4.255	16067.5
	region	SAF	TAO-rv	8.68056	10926.4								region	MEE	CMG-rv	4.255	16082.5
	region	PAS	TAO-rv	8.68056	10926.4								region	CHN	CMG-rv	4.255	16082.5
	region	PAS	TAO-rv	8.68056	10926.8								region	CHN	CMG-rv	4.255	16194.3
	region	USA	SHO-rv	8.68056	10926.8								region	IND	CMG-rv	4.255	16194.3
	region	USA	SHO-rv	8.68056	11062.3								region	IND	CMG-rv	4.255	16246.5
	region	WEU	SHO-rv	8.68056	11062.3								region	OSA	CMG-rv	4.255	16246.5
	region	WEU	SHO-rv	8.68056	11062.8								region	OSA	CMG-rv	4.255	16253.9
	region	EEU	SHO-rv	8.68056	11062.8								region	JPN	CMG-rv	4.255	16253.9
	region	EEU	SHO-rv	8.68056	11062.8								region	JPN	CMG-rv	4.255	16261.3
	region	FSU	SHO-rv	8.68056	11062.8								region	OCN	CMG-rv	4.255	16261.3
	region	FSU	SHO-rv	8.68056	11063.8								region	OCN	CMG-rv	4.255	16298.5
	region	NAF	SHO-rv	8.68056	11063.8								region	PAS	CMG-rv	4.255	16298.5
	region	NAF	SHO-rv	8.68056	11064.5								region	PAS	CMG-rv	4.255	16305.9
	region	MEE	SHO-rv	8.68056	11064.5								region	LAC	CMG-rv	4.255	16305.9
	region	MEE	SHO-rv	8.68056	11068.1								region	LAC	CMG-rv	4.255	16350.7
	region	CHN	SHO-rv	8.68056	11068.1								region	USA	TIG-rv	4.255	16350.7
	region	CHN	SHO-rv	8.68056	11068.9								region	USA	TIG-rv	4.255	16574.3
	region	OCN	SHO-rv	8.68056	11068.9								region	CAN	TIG-rv	4.255	16574.3
	region	OCN	SHO-rv	8.68056	11071.8								region	CAN	TIG-rv	4.255	16686.1
	region	PAS	SHO-rv	8.68056	11071.8								region	WEU	TIG-rv	4.255	16686.1
	region	PAS	SHO-rv	8.68056	11073.1								region	WEU	TIG-rv	4.255	16715.9
	region	LAC	SHO-rv	8.68056	11073.1								region	EEU	TIG-rv	4.255	16715.9
	region	LAC	SHO-rv	8.68056	11073.8								region	EEU	TIG-rv	4.255	16745.7
	region	USA	COO-rs	8.82	11073.8								region	FSU	TIG-rv	4.255	16745.7
	region	USA	COO-rs	8.82	11102.9								region	FSU	TIG-rv	4.255	16954.3
	region	CAN	COO-rs	8.82	11102.9								region	NAF	TIG-rv	4.255	16954.3
	region	CAN	COO-rs	8.82	11126.9								region	NAF	TIG-rv	4.255	17013.9
	region	WEU	COO-rs	8.82	11126.9								region	EAF	TIG-rv	4.255	17013.9
	region	WEU	COO-rs	8.82	11152.3								region	EAF	TIG-rv	4.255	17043.7
	region	EEU	COO-rs	8.82	11152.3								region	WCA	TIG-rv	4.255	17043.7
	region	EEU	COO-rs	8.82	11155.1								region	WCA	TIG-rv	4.255	17133.1
	region	NAF	COO-rs	8.82	11155.1								region	SAF	TIG-rv	4.255	17133.1
	region	NAF	COO-rs	8.82	11161.1								region	SAF	TIG-rv	4.255	17155.5
	region	EAF	COO-rs	8.82	11161.1								region	MEE	TIG-rv	4.255	17155.5
	region	EAF	COO-rs	8.82	11161.5								region	MEE	TIG-rv	4.255	17267.3
	region	WCA	COO-rs	8.82	11161.5								region	CHN	TIG-rv	4.255	17267.3
	region	WCA	COO-rs	8.82	11166.7								region	CHN	TIG-rv	4.255	17289.7
	region	SAF	COO-rs	8.82	11166.7								region	OEA	TIG-rv	4.255	17289.7
	region	SAF	COO-rs	8.82	11169								region	OEA	TIG-rv	4.255	17312.1
	region	CHN	COO-rs	8.82	11169								region	IND	TIG-rv	4.255	17312.1
	region	CHN	COO-rs	8.82	11187.2								region	IND	TIG-rv	4.255	17334.5
	region	OEA	COO-rs	8.82	11187.2								region	OSA	TIG-rv	4.255	17334.5
	region	OEA	COO-rs	8.82	11193.2								region	OSA	TIG-rv	4.255	17379.3
	region	IND	COO-rs	8.82	11193.2								region	OCN	TIG-rv	4.255	17379.3
	region	IND	COO-rs	8.82	11193.9								region	OCN	TIG-rv	4.255	17409.1
	region	OSA	COO-rs	8.82	11193.9								region	PAS	TIG-rv	4.255	17409.1
	region	OSA	COO-rs	8.82	11194.4								region	PAS	TIG-rv	4.255	17453.9
	region	OCN	COO-rs	8.82	11194.4								region	LAC	TIG-rv	4.255	17453.9
	region	OCN	COO-rs	8.82	11195.4								region	LAC	TIG-rv	4.255	17498.7
	region	PAS	COO-rs	8.82	11195.4								region	USA	SHG-rv	4.41	17498.7
	region	PAS	COO-rs	8.82	11197.6								region	USA	SHG-rv	4.41	17711.1
	region	LAC	COO-rs	8.82	11197.6								region	CAN	SHG-rv	4.41	17711.1
	region	LAC	COO-rs	8.82	11220.7								region	CAN	SHG-rv	4.41	17732.3
	region	ARC	COO-rs	8.82	11220.7								region	WEU	SHG-rv	4.41	17732.3
	region	ARC	COO-rs	8.82	11292.6								region	WEU	SHG-rv	4.41	17757.8
	region	USA	COO-rs	9.8973	11292.6								region	EEU	SHG-rv	4.41	17757.8
	region	USA	COO-rs	9.8973	11321.7								region	EEU	SHG-rv	4.41	17783.4
	region	CAN	COO-rs	9.8973	11321.7								region	FSU	SHG-rv	4.41	17783.4
	region	CAN	COO-rs	9.8973	11345.7								region	FSU	SHG-rv	4.41	18038.2
	region	WEU	COO-rs	9.8973	11345.7								region	NAF	SHG-rv	4.41	18038.2
	region	WEU	COO-rs	9.8973	11371.1								region	NAF	SHG-rv	4.41	18055.2
	region	EEU	COO-rs	9.8973	11371.1								region	EAF	SHG-rv	4.41	18055.2
	region	EEU	COO-rs	9.8973	11373.9								region	EAF	SHG-rv	4.41	18063.7
	region	NAF	COO-rs	9.8973	11373.9								region	WCA	SHG-rv	4.41	18063.7
	region	NAF	COO-rs	9.8973	11379.9								region	WCA	SHG-rv	4.41	18097.7
	region	EAF	COO-rs	9.8973	11379.9								region	SAF	SHG-rv	4.41	18097.7
	region	EAF	COO-rs	9.8973	11380.3								region	SAF	SHG-rv	4.41	18106.2
	region	WCA	COO-rs	9.8973	11380.3								region	MEE	SHG-rv	4.41	18106.2
	region	WCA	COO-rs	9.8973	11385.5								region	MEE	SHG-rv	4.41	18123.2
	region	SAF	COO-rs	9.8973	11385.5								region	CHN	SHG-rv	4.41	18123.2
	region	SAF	COO-rs	9.8973	11387.8								region	CHN	SHG-rv	4.41	18131.8
	region	CHN	COO-rs	9.8973	11387.8								region	OEA	SHG-rv	4.41	18131.8
	region	CHN	COO-rs	9.8973	11406								region	OEA	SHG-rv	4.41	18140.3
	region	OEA	COO-rs	9.8973	11406								region	IND	SHG-rv	4.41	18140.3
	region	OEA	COO-rs	9.8973	11412								region	IND	SHG-rv	4.41	18148.9
	region	IND	COO-rs	9.8973	11412								region	OSA	SHG-rv	4.41	18148.9
	region	IND	COO-rs	9.8973	11412.7								region	OSA	SHG-rv	4.41	18174.4
	region	OSA	COO-rs	9.8973	11412.7								region	OCN	SHG-rv	4.41	18174.4
	region	OSA	COO-rs	9.8973	11413.2								region	OCN	SHG-rv	4.41	18191.4
	region	OCN	COO-rs	9.8973	11413.2								region	PAS	SHG-rv	4.41	18191.4
	region	OCN	COO-rs	9.8973	11414.2								region	PAS	SHG-rv	4.41	18199.9
	region	PAS	COO-rs	9.8973	11414.2								region	LAC	SHG-rv	4.41	18199.9
	region	PAS	COO-rs	9.8973	11416.4								region	LAC	SHG-rv	4.41	18216.9
	region	LAC	COO-rs	9.8973	11416.4								region	FSU	COG-rs	4.425	18216.9
	region	LAC	COO-rs	9.8973	11439.5								region	FSU	COG-rs	4.425	18441.2
	region	ARC	COO-rs	9.8973	11439.5								region	USA	DEG-rv	4.5	18441.2
	region	ARC	COO-rs	9.8973	11511.4								region	USA	DEG-rv	4.5	18515.7
	region	USA	EHO-rv	10.4174	11511.4								region	CAN	DEG-rv	4.5	18515.7
	region	USA	EHO-rv	10.4174	11522.4								region	CAN	DEG-rv	4.5	18534.3
	region	CAN	EHO-rv	10.4174	11522.4								region	WEU	DEG-rv	4.5	18534.3
	region	CAN	EHO-rv	10.4174	11522.4								region	WEU	DEG-rv	4.5	18545.5
	region	WEU	EHO-rv	10.4174	11522.4								region	EEU	DEG-rv	4.5	18545.5
	region	WEU	EHO-rv	10.4174	11522.7								region	EEU	DEG-rv	4.5	18556.7
	region	EEU	EHO-rv	10.4174	11522.7								region	FSU	DEG-rv	4.5	18556.7
	region	EEU	EHO-rv	10.4174	11522.7								region	FSU	DEG-rv	4.5	18668.5
	region	FSU	EHO-rv	10.4174	11522.7								region	NAF	DEG-rv	4.5	18668.5
	region	FSU	EHO-rv	10.4174	11522.8								region	NAF	DEG-rv	4.5	18705.8
	region	NAF	EHO-rv	10.4174	11522.8								region	EAF	DEG-rv	4.5	18705.8
	region	NAF	EHO-rv	10.4174	11522.9								region	EAF	DEG-rv	4.5	18717
	region	MEE	EHO-rv	10.4174	11522.9								region	WCA	DEG-rv	4.5	18717
	region	MEE	EHO-rv	10.4174	11522.9								region	WCA	DEG-rv	4.5	18743.1
	region	CHN	EHO-rv	10.4174	11522.9								region	SAF	DEG-rv	4.5	18743.1
	region	CHN	EHO-rv	10.4174	11523.5								region	SAF	DEG-rv	4.5	18750.6
	region	LAC	EHO-rv	10.4174	11523.5								region	MEE	DEG-rv	4.5	18750.6
	region	LAC	EHO-rv	10.4174	11554.6								region	MEE	DEG-rv	4.5	18776.7
	region	CAN	TAO-rv	10.4174	11554.6								region	CHN	DEG-rv	4.5	18776.7
	region	CAN	TAO-rv	10.4174	11744.2								region	CHN	DEG-rv	4.5	18784.2
	region	WEU	TAO-rv	10.4174	11744.2								region	IND	DEG-rv	4.5	18784.2
	region	WEU	TAO-rv	10.4174	11744.5								region	IND	DEG-rv	4.5	18791.7
	region	FSU	TAO-rv	10.4174	11744.5								region	OSA	DEG-rv	4.5	18791.7
	region	FSU	TAO-rv	10.4174	11855.6								region	OSA	DEG-rv	4.5	18810.3
	region	EAF	TAO-rv	10.4174	11855.6								region	OCN	DEG-rv	4.5	18810.3
	region	EAF	TAO-rv	10.4174	11856								region	OCN	DEG-rv	4.5	18817.8
	region	WCA	TAO-rv	10.4174	11856								region	PAS	DEG-rv	4.5	18817.8
	region	WCA	TAO-rv	10.4174	11856.5								region	PAS	DEG-rv	4.5	18825.3
	region	SAF	TAO-rv	10.4174	11856.5								region	LAC	DEG-rv	4.5	18825.3
	region	SAF	TAO-rv	10.4174	11857.1								region	LAC	DEG-rv	4.5	18847.7
	region	PAS	TAO-rv	10.4174	11857.1								region	FSU	COG-rs	4.85865	18847.7
	region	PAS	TAO-rv	10.4174	11857.5								region	FSU	COG-rs	4.85865	19071.9
	region	USA	SHO-rv	10.4174	11857.5								region	NAF	COG-rv	4.9014	19071.9
	region	USA	SHO-rv	10.4174	12083.4								region	NAF	COG-rv	4.9014	19080.4
	region	WEU	SHO-rv	10.4174	12083.4								region	EAF	COG-rv	4.9014	19080.4
	region	WEU	SHO-rv	10.4174	12084.6								region	EAF	COG-rv	4.9014	19080.4
	region	EEU	SHO-rv	10.4174	12084.6								region	USA	COG-rs	4.9014	19080.4
	region	EEU	SHO-rv	10.4174	12084.6								region	USA	COG-rs	4.9014	19141.7
	region	FSU	SHO-rv	10.4174	12084.6								region	CAN	COG-rs	4.9014	19141.7
	region	FSU	SHO-rv	10.4174	12086.2								region	CAN	COG-rs	4.9014	19171.8
	region	NAF	SHO-rv	10.4174	12086.2								region	WEU	COG-rs	4.9014	19171.8
	region	NAF	SHO-rv	10.4174	12087								region	WEU	COG-rs	4.9014	19191.3
	region	MEE	SHO-rv	10.4174	12087								region	EEU	COG-rs	4.9014	19191.3
	region	MEE	SHO-rv	10.4174	12087.9								region	EEU	COG-rs	4.9014	19193.9
	region	CHN	SHO-rv	10.4174	12087.9								region	NAF	COG-rs	4.9014	19193.9
	region	CHN	SHO-rv	10.4174	12089								region	NAF	COG-rs	4.9014	19250.2
	region	OCN	SHO-rv	10.4174	12089								region	EAF	COG-rs	4.9014	19250.2
	region	OCN	SHO-rv	10.4174	12092.2								region	EAF	COG-rs	4.9014	19254
	region	PAS	SHO-rv	10.4174	12092.2								region	WCA	COG-rs	4.9014	19254
	region	PAS	SHO-rv	10.4174	12093.7								region	WCA	COG-rs	4.9014	19260.8
	region	LAC	SHO-rv	10.4174	12093.7								region	SAF	COG-rs	4.9014	19260.8
	region	LAC	SHO-rv	10.4174	12094.3								region	SAF	COG-rs	4.9014	19264.2
	region	USA	COO-rs	10.9746	12094.3								region	CHN	COG-rs	4.9014	19264.2
	region	USA	COO-rs	10.9746	12123.4								region	CHN	COG-rs	4.9014	19283.5
	region	CAN	COO-rs	10.9746	12123.4								region	OEA	COG-rs	4.9014	19283.5
	region	CAN	COO-rs	10.9746	12147.4								region	OEA	COG-rs	4.9014	19286.7
	region	WEU	COO-rs	10.9746	12147.4								region	IND	COG-rs	4.9014	19286.7
	region	WEU	COO-rs	10.9746	12172.8								region	IND	COG-rs	4.9014	19290.3
	region	EEU	COO-rs	10.9746	12172.8								region	OSA	COG-rs	4.9014	19290.3
	region	EEU	COO-rs	10.9746	12175.6								region	OSA	COG-rs	4.9014	19297.7
	region	NAF	COO-rs	10.9746	12175.6								region	OCN	COG-rs	4.9014	19297.7
	region	NAF	COO-rs	10.9746	12181.6								region	OCN	COG-rs	4.9014	19301.8
	region	EAF	COO-rs	10.9746	12181.6								region	PAS	COG-rs	4.9014	19301.8
	region	EAF	COO-rs	10.9746	12182								region	PAS	COG-rs	4.9014	19336.1
	region	WCA	COO-rs	10.9746	12182								region	LAC	COG-rs	4.9014	19336.1
	region	WCA	COO-rs	10.9746	12187.2								region	LAC	COG-rs	4.9014	19373.3
	region	SAF	COO-rs	10.9746	12187.2								region	ARC	COG-rs	4.9014	19373.3
	region	SAF	COO-rs	10.9746	12189.5								region	ARC	COG-rs	4.9014	19427.9
	region	CHN	COO-rs	10.9746	12189.5								region	USA	CMG-rv	5.221	19427.9
	region	CHN	COO-rs	10.9746	12207.7								region	USA	CMG-rv	5.221	19651.4
	region	OEA	COO-rs	10.9746	12207.7								region	CAN	CMG-rv	5.221	19651.4
	region	OEA	COO-rs	10.9746	12213.7								region	CAN	CMG-rv	5.221	19714
	region	IND	COO-rs	10.9746	12213.7								region	WEU	CMG-rv	5.221	19714
	region	IND	COO-rs	10.9746	12214.4								region	WEU	CMG-rv	5.221	19776.6
	region	OSA	COO-rs	10.9746	12214.4								region	EEU	CMG-rv	5.221	19776.6
	region	OSA	COO-rs	10.9746	12214.9								region	EEU	CMG-rv	5.221	19794.6
	region	OCN	COO-rs	10.9746	12214.9								region	FSU	CMG-rv	5.221	19794.6
	region	OCN	COO-rs	10.9746	12215.9								region	FSU	CMG-rv	5.221	19973.4
	region	PAS	COO-rs	10.9746	12215.9								region	NAF	CMG-rv	5.221	19973.4
	region	PAS	COO-rs	10.9746	12218.1								region	NAF	CMG-rv	5.221	20009.2
	region	LAC	COO-rs	10.9746	12218.1								region	EAF	CMG-rv	5.221	20009.2
	region	LAC	COO-rs	10.9746	12241.2								region	EAF	CMG-rv	5.221	20027.2
	region	ARC	COO-rs	10.9746	12241.2								region	WCA	CMG-rv	5.221	20027.2
	region	ARC	COO-rs	10.9746	12313.1								region	WCA	CMG-rv	5.221	20045.2
	region	USA	COO-rs	12.0519	12313.1								region	SAF	CMG-rv	5.221	20045.2
	region	USA	COO-rs	12.0519	12342.2								region	SAF	CMG-rv	5.221	20063.2
	region	CAN	COO-rs	12.0519	12342.2								region	MEE	CMG-rv	5.221	20063.2
	region	CAN	COO-rs	12.0519	12366.2								region	MEE	CMG-rv	5.221	20081.2
	region	WEU	COO-rs	12.0519	12366.2								region	CHN	CMG-rv	5.221	20081.2
	region	WEU	COO-rs	12.0519	12391.6								region	CHN	CMG-rv	5.221	20215.4
	region	EEU	COO-rs	12.0519	12391.6								region	IND	CMG-rv	5.221	20215.4
	region	EEU	COO-rs	12.0519	12394.4								region	IND	CMG-rv	5.221	20278
	region	NAF	COO-rs	12.0519	12394.4								region	OSA	CMG-rv	5.221	20278
	region	NAF	COO-rs	12.0519	12400.4								region	OSA	CMG-rv	5.221	20286.9
	region	EAF	COO-rs	12.0519	12400.4								region	JPN	CMG-rv	5.221	20286.9
	region	EAF	COO-rs	12.0519	12400.8								region	JPN	CMG-rv	5.221	20295.8
	region	WCA	COO-rs	12.0519	12400.8								region	OCN	CMG-rv	5.221	20295.8
	region	WCA	COO-rs	12.0519	12406								region	OCN	CMG-rv	5.221	20340.4
	region	SAF	COO-rs	12.0519	12406								region	PAS	CMG-rv	5.221	20340.4
	region	SAF	COO-rs	12.0519	12408.3								region	PAS	CMG-rv	5.221	20349.3
	region	CHN	COO-rs	12.0519	12408.3								region	LAC	CMG-rv	5.221	20349.3
	region	CHN	COO-rs	12.0519	12426.5								region	LAC	CMG-rv	5.221	20403
	region	OEA	COO-rs	12.0519	12426.5								region	USA	TIG-rv	5.221	20403
	region	OEA	COO-rs	12.0519	12432.5								region	USA	TIG-rv	5.221	20671.4
	region	IND	COO-rs	12.0519	12432.5								region	CAN	TIG-rv	5.221	20671.4
	region	IND	COO-rs	12.0519	12433.2								region	CAN	TIG-rv	5.221	20805.5
	region	OSA	COO-rs	12.0519	12433.2								region	WEU	TIG-rv	5.221	20805.5
	region	OSA	COO-rs	12.0519	12433.7								region	WEU	TIG-rv	5.221	20841.3
	region	OCN	COO-rs	12.0519	12433.7								region	EEU	TIG-rv	5.221	20841.3
	region	OCN	COO-rs	12.0519	12434.7								region	EEU	TIG-rv	5.221	20877
	region	PAS	COO-rs	12.0519	12434.7								region	FSU	TIG-rv	5.221	20877
	region	PAS	COO-rs	12.0519	12436.9								region	FSU	TIG-rv	5.221	21127.4
	region	LAC	COO-rs	12.0519	12436.9								region	NAF	TIG-rv	5.221	21127.4
	region	LAC	COO-rs	12.0519	12459.9								region	NAF	TIG-rv	5.221	21198.9
	region	ARC	COO-rs	12.0519	12459.9								region	EAF	TIG-rv	5.221	21198.9
	region	ARC	COO-rs	12.0519	12531.9								region	EAF	TIG-rv	5.221	21234.6
	region	USA	EHO-rv	12.1542	12531.9								region	WCA	TIG-rv	5.221	21234.6
	region	USA	EHO-rv	12.1542	12540.8								region	WCA	TIG-rv	5.221	21341.9
	region	CAN	EHO-rv	12.1542	12540.8								region	SAF	TIG-rv	5.221	21341.9
	region	CAN	EHO-rv	12.1542	12540.9								region	SAF	TIG-rv	5.221	21368.8
	region	WEU	EHO-rv	12.1542	12540.9								region	MEE	TIG-rv	5.221	21368.8
	region	WEU	EHO-rv	12.1542	12540.9								region	MEE	TIG-rv	5.221	21503
	region	EEU	EHO-rv	12.1542	12540.9								region	CHN	TIG-rv	5.221	21503
	region	EEU	EHO-rv	12.1542	12540.9								region	CHN	TIG-rv	5.221	21529.8
	region	FSU	EHO-rv	12.1542	12540.9								region	OEA	TIG-rv	5.221	21529.8
	region	FSU	EHO-rv	12.1542	12541.1								region	OEA	TIG-rv	5.221	21556.7
	region	NAF	EHO-rv	12.1542	12541.1								region	IND	TIG-rv	5.221	21556.7
	region	NAF	EHO-rv	12.1542	12541.1								region	IND	TIG-rv	5.221	21583.6
	region	MEE	EHO-rv	12.1542	12541.1								region	OSA	TIG-rv	5.221	21583.6
	region	MEE	EHO-rv	12.1542	12541.2								region	OSA	TIG-rv	5.221	21637.4
	region	CHN	EHO-rv	12.1542	12541.2								region	OCN	TIG-rv	5.221	21637.4
	region	CHN	EHO-rv	12.1542	12542.2								region	OCN	TIG-rv	5.221	21673.1
	region	LAC	EHO-rv	12.1542	12542.2								region	PAS	TIG-rv	5.221	21673.1
	region	LAC	EHO-rv	12.1542	12587.2								region	PAS	TIG-rv	5.221	21726.9
	region	CAN	TAO-rv	12.1542	12587.2								region	LAC	TIG-rv	5.221	21726.9
	region	CAN	TAO-rv	12.1542	12741.2								region	LAC	TIG-rv	5.221	21780.6
	region	WEU	TAO-rv	12.1542	12741.2								region	FSU	COG-rs	5.2923	21780.6
	region	WEU	TAO-rv	12.1542	12741.3								region	FSU	COG-rs	5.2923	22004.9
	region	FSU	TAO-rv	12.1542	12741.3								region	USA	SHG-rv	5.439	22004.9
	region	FSU	TAO-rv	12.1542	12866.6								region	USA	SHG-rv	5.439	22270.4
	region	WCA	TAO-rv	12.1542	12866.6								region	CAN	SHG-rv	5.439	22270.4
	region	WCA	TAO-rv	12.1542	12867.4								region	CAN	SHG-rv	5.439	22296.9
	region	SAF	TAO-rv	12.1542	12867.4								region	WEU	SHG-rv	5.439	22296.9
	region	SAF	TAO-rv	12.1542	12868.1								region	WEU	SHG-rv	5.439	22328.8
	region	PAS	TAO-rv	12.1542	12868.1								region	EEU	SHG-rv	5.439	22328.8
	region	PAS	TAO-rv	12.1542	12868.4								region	EEU	SHG-rv	5.439	22360.7
	region	USA	SHO-rv	12.1542	12868.4								region	FSU	SHG-rv	5.439	22360.7
	region	USA	SHO-rv	12.1542	13051.8								region	FSU	SHG-rv	5.439	22679.2
	region	WEU	SHO-rv	12.1542	13051.8								region	NAF	SHG-rv	5.439	22679.2
	region	WEU	SHO-rv	12.1542	13052.2								region	NAF	SHG-rv	5.439	22700.4
	region	EEU	SHO-rv	12.1542	13052.2								region	EAF	SHG-rv	5.439	22700.4
	region	EEU	SHO-rv	12.1542	13052.2								region	EAF	SHG-rv	5.439	22711.1
	region	FSU	SHO-rv	12.1542	13052.2								region	WCA	SHG-rv	5.439	22711.1
	region	FSU	SHO-rv	12.1542	13053.9								region	WCA	SHG-rv	5.439	22753.6
	region	NAF	SHO-rv	12.1542	13053.9								region	SAF	SHG-rv	5.439	22753.6
	region	NAF	SHO-rv	12.1542	13055.2								region	SAF	SHG-rv	5.439	22764.3
	region	MEE	SHO-rv	12.1542	13055.2								region	MEE	SHG-rv	5.439	22764.3
	region	MEE	SHO-rv	12.1542	13082.9								region	MEE	SHG-rv	5.439	22785.5
	region	CHN	SHO-rv	12.1542	13082.9								region	CHN	SHG-rv	5.439	22785.5
	region	CHN	SHO-rv	12.1542	13084.6								region	CHN	SHG-rv	5.439	22796.2
	region	OCN	SHO-rv	12.1542	13084.6								region	OEA	SHG-rv	5.439	22796.2
	region	OCN	SHO-rv	12.1542	13086.7								region	OEA	SHG-rv	5.439	22806.9
	region	PAS	SHO-rv	12.1542	13086.7								region	IND	SHG-rv	5.439	22806.9
	region	PAS	SHO-rv	12.1542	13087.8								region	IND	SHG-rv	5.439	22817.6
	region	LAC	SHO-rv	12.1542	13087.8								region	OSA	SHG-rv	5.439	22817.6
	region	LAC	SHO-rv	12.1542	13088.7								region	OSA	SHG-rv	5.439	22849.5
	region	USA	EHO-rv	13.8911	13088.7								region	OCN	SHG-rv	5.439	22849.5
	region	USA	EHO-rv	13.8911	13102.1								region	OCN	SHG-rv	5.439	22870.7
	region	CAN	EHO-rv	13.8911	13102.1								region	PAS	SHG-rv	5.439	22870.7
	region	CAN	EHO-rv	13.8911	13102.1								region	PAS	SHG-rv	5.439	22881.4
	region	WEU	EHO-rv	13.8911	13102.1								region	LAC	SHG-rv	5.439	22881.4
	region	WEU	EHO-rv	13.8911	13102.3								region	LAC	SHG-rv	5.439	22902.6
	region	EEU	EHO-rv	13.8911	13102.3								region	USA	DEG-rv	5.55	22902.6
	region	EEU	EHO-rv	13.8911	13102.3								region	USA	DEG-rv	5.55	22995.8
	region	FSU	EHO-rv	13.8911	13102.3								region	CAN	DEG-rv	5.55	22995.8
	region	FSU	EHO-rv	13.8911	13102.5								region	CAN	DEG-rv	5.55	23019
	region	NAF	EHO-rv	13.8911	13102.5								region	WEU	DEG-rv	5.55	23019
	region	NAF	EHO-rv	13.8911	13102.6								region	WEU	DEG-rv	5.55	23033
	region	MEE	EHO-rv	13.8911	13102.6								region	EEU	DEG-rv	5.55	23033
	region	MEE	EHO-rv	13.8911	13102.6								region	EEU	DEG-rv	5.55	23047
	region	CHN	EHO-rv	13.8911	13102.6								region	FSU	DEG-rv	5.55	23047
	region	CHN	EHO-rv	13.8911	13103.6								region	FSU	DEG-rv	5.55	23186.8
	region	LAC	EHO-rv	13.8911	13103.6								region	NAF	DEG-rv	5.55	23186.8
	region	LAC	EHO-rv	13.8911	13175.7								region	NAF	DEG-rv	5.55	23233.4
	region	CAN	TAO-rv	13.8911	13175.7								region	EAF	DEG-rv	5.55	23233.4
	region	CAN	TAO-rv	13.8911	13406.7								region	EAF	DEG-rv	5.55	23247.4
	region	WEU	TAO-rv	13.8911	13406.7								region	WCA	DEG-rv	5.55	23247.4
	region	WEU	TAO-rv	13.8911	13406.9								region	WCA	DEG-rv	5.55	23280
	region	FSU	TAO-rv	13.8911	13406.9								region	SAF	DEG-rv	5.55	23280
	region	FSU	TAO-rv	13.8911	13557.3								region	SAF	DEG-rv	5.55	23289.4
	region	EAF	TAO-rv	13.8911	13557.3								region	MEE	DEG-rv	5.55	23289.4
	region	EAF	TAO-rv	13.8911	13557.5								region	MEE	DEG-rv	5.55	23322
	region	WCA	TAO-rv	13.8911	13557.5								region	CHN	DEG-rv	5.55	23322
	region	WCA	TAO-rv	13.8911	13558.3								region	CHN	DEG-rv	5.55	23331.4
	region	SAF	TAO-rv	13.8911	13558.3								region	IND	DEG-rv	5.55	23331.4
	region	SAF	TAO-rv	13.8911	13558.7								region	IND	DEG-rv	5.55	23340.8
	region	PAS	TAO-rv	13.8911	13558.7								region	OSA	DEG-rv	5.55	23340.8
	region	PAS	TAO-rv	13.8911	13559.5								region	OSA	DEG-rv	5.55	23364
	region	USA	SHO-rv	13.8911	13559.5								region	OCN	DEG-rv	5.55	23364
	region	USA	SHO-rv	13.8911	13834.7								region	OCN	DEG-rv	5.55	23373.4
	region	WEU	SHO-rv	13.8911	13834.7								region	PAS	DEG-rv	5.55	23373.4
	region	WEU	SHO-rv	13.8911	13835.6								region	PAS	DEG-rv	5.55	23382.8
	region	EEU	SHO-rv	13.8911	13835.6								region	LAC	DEG-rv	5.55	23382.8
	region	EEU	SHO-rv	13.8911	13835.6								region	LAC	DEG-rv	5.55	23410.8
	region	FSU	SHO-rv	13.8911	13835.6								region	NAF	COG-rv	5.6007	23410.8
	region	FSU	SHO-rv	13.8911	13837.7								region	NAF	COG-rv	5.6007	23419.2
	region	NAF	SHO-rv	13.8911	13837.7								region	EAF	COG-rv	5.6007	23419.2
	region	NAF	SHO-rv	13.8911	13839								region	EAF	COG-rv	5.6007	23419.2
	region	MEE	SHO-rv	13.8911	13839								region	USA	COG-rs	5.6007	23419.2
	region	MEE	SHO-rv	13.8911	13846.4								region	USA	COG-rs	5.6007	23480.6
	region	CHN	SHO-rv	13.8911	13846.4								region	CAN	COG-rs	5.6007	23480.6
	region	CHN	SHO-rv	13.8911	13848								region	CAN	COG-rs	5.6007	23510.6
	region	OCN	SHO-rv	13.8911	13848								region	WEU	COG-rs	5.6007	23510.6
	region	OCN	SHO-rv	13.8911	13853.8								region	WEU	COG-rs	5.6007	23530.2
	region	PAS	SHO-rv	13.8911	13853.8								region	EEU	COG-rs	5.6007	23530.2
	region	PAS	SHO-rv	13.8911	13856.5								region	EEU	COG-rs	5.6007	23532.8
	region	LAC	SHO-rv	13.8911	13856.5								region	NAF	COG-rs	5.6007	23532.8
	region	LAC	SHO-rv	13.8911	13858								region	NAF	COG-rs	5.6007	23589
	region	USA	EHO-rv	15.6279	13858								region	EAF	COG-rs	5.6007	23589
	region	USA	EHO-rv	15.6279	13880.3								region	EAF	COG-rs	5.6007	23592.8
	region	CAN	EHO-rv	15.6279	13880.3								region	WCA	COG-rs	5.6007	23592.8
	region	CAN	EHO-rv	15.6279	13880.3								region	WCA	COG-rs	5.6007	23599.7
	region	WEU	EHO-rv	15.6279	13880.3								region	SAF	COG-rs	5.6007	23599.7
	region	WEU	EHO-rv	15.6279	13880.8								region	SAF	COG-rs	5.6007	23603
	region	EEU	EHO-rv	15.6279	13880.8								region	CHN	COG-rs	5.6007	23603
	region	EEU	EHO-rv	15.6279	13880.9								region	CHN	COG-rs	5.6007	23622.4
	region	FSU	EHO-rv	15.6279	13880.9								region	OEA	COG-rs	5.6007	23622.4
	region	FSU	EHO-rv	15.6279	13881.2								region	OEA	COG-rs	5.6007	23625.5
	region	NAF	EHO-rv	15.6279	13881.2								region	IND	COG-rs	5.6007	23625.5
	region	NAF	EHO-rv	15.6279	13881.3								region	IND	COG-rs	5.6007	23629.1
	region	MEE	EHO-rv	15.6279	13881.3								region	OSA	COG-rs	5.6007	23629.1
	region	MEE	EHO-rv	15.6279	13881.3								region	OSA	COG-rs	5.6007	23636.5
	region	CHN	EHO-rv	15.6279	13881.3								region	OCN	COG-rs	5.6007	23636.5
	region	CHN	EHO-rv	15.6279	13882.6								region	OCN	COG-rs	5.6007	23640.6
	region	LAC	EHO-rv	15.6279	13882.6								region	PAS	COG-rs	5.6007	23640.6
	region	LAC	EHO-rv	15.6279	13945.7								region	PAS	COG-rs	5.6007	23675
	region	CAN	TAO-rv	15.6279	13945.7								region	LAC	COG-rs	5.6007	23675
	region	CAN	TAO-rv	15.6279	14330.7								region	LAC	COG-rs	5.6007	23712.1
	region	WEU	TAO-rv	15.6279	14330.7								region	ARC	COG-rs	5.6007	23712.1
	region	WEU	TAO-rv	15.6279	14331.3								region	ARC	COG-rs	5.6007	23766.8
	region	FSU	TAO-rv	15.6279	14331.3								region	FSU	COG-rs	5.72595	23766.8
	region	FSU	TAO-rv	15.6279	14556.8								region	FSU	COG-rs	5.72595	23991
	region	EAF	TAO-rv	15.6279	14556.8								region	USA	COG-rs	6.3	23991
	region	EAF	TAO-rv	15.6279	14557.6								region	USA	COG-rs	6.3	24015.6
	region	WCA	TAO-rv	15.6279	14557.6								region	CAN	COG-rs	6.3	24015.6
	region	WCA	TAO-rv	15.6279	14558.7								region	CAN	COG-rs	6.3	24045.6
	region	SAF	TAO-rv	15.6279	14558.7								region	WEU	COG-rs	6.3	24045.6
	region	SAF	TAO-rv	15.6279	14559.7								region	WEU	COG-rs	6.3	24065.2
	region	PAS	TAO-rv	15.6279	14559.7								region	EEU	COG-rs	6.3	24065.2
	region	PAS	TAO-rv	15.6279	14560.6								region	EEU	COG-rs	6.3	24067.6
	region	USA	SHO-rv	15.6279	14560.6								region	NAF	COG-rs	6.3	24067.6
	region	USA	SHO-rv	15.6279	15019.3								region	NAF	COG-rs	6.3	24092.4
	region	WEU	SHO-rv	15.6279	15019.3								region	EAF	COG-rs	6.3	24092.4
	region	WEU	SHO-rv	15.6279	15021.8								region	EAF	COG-rs	6.3	24094.1
	region	EEU	SHO-rv	15.6279	15021.8								region	SAF	COG-rs	6.3	24094.1
	region	EEU	SHO-rv	15.6279	15021.8								region	SAF	COG-rs	6.3	24095.2
	region	FSU	SHO-rv	15.6279	15021.8								region	CHN	COG-rs	6.3	24095.2
	region	FSU	SHO-rv	15.6279	15024.9								region	CHN	COG-rs	6.3	24114.6
	region	NAF	SHO-rv	15.6279	15024.9								region	OEA	COG-rs	6.3	24114.6
	region	NAF	SHO-rv	15.6279	15026.6								region	OEA	COG-rs	6.3	24117.7
	region	MEE	SHO-rv	15.6279	15026.6								region	IND	COG-rs	6.3	24117.7
	region	MEE	SHO-rv	15.6279	15028.4								region	IND	COG-rs	6.3	24119.9
	region	CHN	SHO-rv	15.6279	15028.4								region	OSA	COG-rs	6.3	24119.9
	region	CHN	SHO-rv	15.6279	15030.6								region	OSA	COG-rs	6.3	24122.8
	region	OCN	SHO-rv	15.6279	15030.6								region	PAS	COG-rs	6.3	24122.8
	region	OCN	SHO-rv	15.6279	15037.1								region	PAS	COG-rs	6.3	24129.7
	region	PAS	SHO-rv	15.6279	15037.1								region	LAC	COG-rs	6.3	24129.7
	region	PAS	SHO-rv	15.6279	15040.2								region	LAC	COG-rs	6.3	24152
	region	LAC	SHO-rv	15.6279	15040.2								region	ARC	COG-rs	6.3	24152
	region	LAC	SHO-rv	15.6279	15041.5								region	ARC	COG-rs	6.3	24315.9
	region	USA	EHO-rs	17.3648	15041.5								region	USA	CMG-rv	6.3802	24315.9
	region	USA	EHO-rs	17.3648	15109.6								region	USA	CMG-rv	6.3802	24502.1
	region	CAN	EHO-rs	17.3648	15109.6								region	CAN	CMG-rv	6.3802	24502.1
	region	CAN	EHO-rs	17.3648	15238								region	CAN	CMG-rv	6.3802	24554.3
	region	WEU	EHO-rs	17.3648	15238								region	WEU	CMG-rv	6.3802	24554.3
	region	WEU	EHO-rs	17.3648	15238.2								region	WEU	CMG-rv	6.3802	24606.5
	region	EEU	EHO-rs	17.3648	15238.2								region	EEU	CMG-rv	6.3802	24606.5
	region	EEU	EHO-rs	17.3648	15238.2								region	EEU	CMG-rv	6.3802	24621.5
	region	FSU	EHO-rs	17.3648	15238.2								region	FSU	CMG-rv	6.3802	24621.5
	region	FSU	EHO-rs	17.3648	15238.4								region	FSU	CMG-rv	6.3802	24770.5
	region	MEE	EHO-rs	17.3648	15238.4								region	NAF	CMG-rv	6.3802	24770.5
	region	MEE	EHO-rs	17.3648	15348.5								region	NAF	CMG-rv	6.3802	24800.3
	region	CHN	EHO-rs	17.3648	15348.5								region	EAF	CMG-rv	6.3802	24800.3
	region	CHN	EHO-rs	17.3648	15352								region	EAF	CMG-rv	6.3802	24815.3
	region	OEA	EHO-rs	17.3648	15352								region	WCA	CMG-rv	6.3802	24815.3
	region	OEA	EHO-rs	17.3648	15352.9								region	WCA	CMG-rv	6.3802	24830.3
	region	IND	EHO-rs	17.3648	15352.9								region	SAF	CMG-rv	6.3802	24830.3
	region	IND	EHO-rs	17.3648	15353.2								region	SAF	CMG-rv	6.3802	24845.3
	region	LAC	EHO-rs	17.3648	15353.2								region	MEE	CMG-rv	6.3802	24845.3
	region	LAC	EHO-rs	17.3648	15353.4								region	MEE	CMG-rv	6.3802	24860.3
	region	USA	TAO-rs	17.3648	15353.4								region	CHN	CMG-rv	6.3802	24860.3
	region	USA	TAO-rs	17.3648	15358.3								region	CHN	CMG-rv	6.3802	24972.1
	region	CAN	TAO-rs	17.3648	15358.3								region	IND	CMG-rv	6.3802	24972.1
	region	CAN	TAO-rs	17.3648	16036.3								region	IND	CMG-rv	6.3802	25024.3
	region	WEU	TAO-rs	17.3648	16036.3								region	OSA	CMG-rv	6.3802	25024.3
	region	WEU	TAO-rs	17.3648	16036.4								region	OSA	CMG-rv	6.3802	25031.7
	region	EEU	TAO-rs	17.3648	16036.4								region	JPN	CMG-rv	6.3802	25031.7
	region	EEU	TAO-rs	17.3648	16036.4								region	JPN	CMG-rv	6.3802	25039.1
	region	FSU	TAO-rs	17.3648	16036.4								region	OCN	CMG-rv	6.3802	25039.1
	region	FSU	TAO-rs	17.3648	16236.2								region	OCN	CMG-rv	6.3802	25076.3
	region	EAF	TAO-rs	17.3648	16236.2								region	PAS	CMG-rv	6.3802	25076.3
	region	EAF	TAO-rs	17.3648	16236.3								region	PAS	CMG-rv	6.3802	25083.7
	region	WCA	TAO-rs	17.3648	16236.3								region	LAC	CMG-rv	6.3802	25083.7
	region	WCA	TAO-rs	17.3648	16236.6								region	LAC	CMG-rv	6.3802	25128.5
	region	SAF	TAO-rs	17.3648	16236.6								region	USA	TIG-rv	6.3802	25128.5
	region	SAF	TAO-rs	17.3648	16236.9								region	USA	TIG-rv	6.3802	25352.1
	region	CHN	TAO-rs	17.3648	16236.9								region	CAN	TIG-rv	6.3802	25352.1
	region	CHN	TAO-rs	17.3648	16236.9								region	CAN	TIG-rv	6.3802	25463.9
	region	PAS	TAO-rs	17.3648	16236.9								region	WEU	TIG-rv	6.3802	25463.9
	region	PAS	TAO-rs	17.3648	16237.2								region	WEU	TIG-rv	6.3802	25493.7
	region	LAC	TAO-rs	17.3648	16237.2								region	EEU	TIG-rv	6.3802	25493.7
	region	LAC	TAO-rs	17.3648	16600.3								region	EEU	TIG-rv	6.3802	25523.5
	region	USA	SHO-rs	17.3648	16600.3								region	FSU	TIG-rv	6.3802	25523.5
	region	USA	SHO-rs	17.3648	16850.3								region	FSU	TIG-rv	6.3802	25732.1
	region	CAN	SHO-rs	17.3648	16850.3								region	NAF	TIG-rv	6.3802	25732.1
	region	CAN	SHO-rs	17.3648	16856.4								region	NAF	TIG-rv	6.3802	25791.7
	region	WEU	SHO-rs	17.3648	16856.4								region	EAF	TIG-rv	6.3802	25791.7
	region	WEU	SHO-rs	17.3648	16863.9								region	EAF	TIG-rv	6.3802	25821.5
	region	EEU	SHO-rs	17.3648	16863.9								region	WCA	TIG-rv	6.3802	25821.5
	region	EEU	SHO-rs	17.3648	16863.9								region	WCA	TIG-rv	6.3802	25910.9
	region	FSU	SHO-rs	17.3648	16863.9								region	SAF	TIG-rv	6.3802	25910.9
	region	FSU	SHO-rs	17.3648	16915.5								region	SAF	TIG-rv	6.3802	25933.3
	region	EAF	SHO-rs	17.3648	16915.5								region	MEE	TIG-rv	6.3802	25933.3
	region	EAF	SHO-rs	17.3648	16915.5								region	MEE	TIG-rv	6.3802	26045.1
	region	WCA	SHO-rs	17.3648	16915.5								region	CHN	TIG-rv	6.3802	26045.1
	region	WCA	SHO-rs	17.3648	16931.3								region	CHN	TIG-rv	6.3802	26067.5
	region	SAF	SHO-rs	17.3648	16931.3								region	OEA	TIG-rv	6.3802	26067.5
	region	SAF	SHO-rs	17.3648	16931.3								region	OEA	TIG-rv	6.3802	26089.9
	region	MEE	SHO-rs	17.3648	16931.3								region	IND	TIG-rv	6.3802	26089.9
	region	MEE	SHO-rs	17.3648	16940.9								region	IND	TIG-rv	6.3802	26112.3
	region	CHN	SHO-rs	17.3648	16940.9								region	OSA	TIG-rv	6.3802	26112.3
	region	CHN	SHO-rs	17.3648	16942.8								region	OSA	TIG-rv	6.3802	26157.1
	region	OEA	SHO-rs	17.3648	16942.8								region	OCN	TIG-rv	6.3802	26157.1
	region	OEA	SHO-rs	17.3648	16942.9								region	OCN	TIG-rv	6.3802	26186.9
	region	OCN	SHO-rs	17.3648	16942.9								region	PAS	TIG-rv	6.3802	26186.9
	region	OCN	SHO-rs	17.3648	16946.6								region	PAS	TIG-rv	6.3802	26231.7
	region	PAS	SHO-rs	17.3648	16946.6								region	LAC	TIG-rv	6.3802	26231.7
	region	PAS	SHO-rs	17.3648	16948.3								region	LAC	TIG-rv	6.3802	26276.5
	region	LAC	SHO-rs	17.3648	16948.3								region	USA	SHG-rv	6.6738	26276.5
	region	LAC	SHO-rs	17.3648	16967.9								region	USA	SHG-rv	6.6738	26595.1
	region	USA	EHO-rs	19.1016	16967.9								region	CAN	SHG-rv	6.6738	26595.1
	region	USA	EHO-rs	19.1016	17058.7								region	CAN	SHG-rv	6.6738	26626.9
	region	CAN	EHO-rs	19.1016	17058.7								region	WEU	SHG-rv	6.6738	26626.9
	region	CAN	EHO-rs	19.1016	17110.1								region	WEU	SHG-rv	6.6738	26665.2
	region	WEU	EHO-rs	19.1016	17110.1								region	EEU	SHG-rv	6.6738	26665.2
	region	WEU	EHO-rs	19.1016	17110.4								region	EEU	SHG-rv	6.6738	26703.5
	region	EEU	EHO-rs	19.1016	17110.4								region	FSU	SHG-rv	6.6738	26703.5
	region	EEU	EHO-rs	19.1016	17110.4								region	FSU	SHG-rv	6.6738	27085.7
	region	FSU	EHO-rs	19.1016	17110.4								region	NAF	SHG-rv	6.6738	27085.7
	region	FSU	EHO-rs	19.1016	17110.7								region	NAF	SHG-rv	6.6738	27111.1
	region	NAF	EHO-rs	19.1016	17110.7								region	EAF	SHG-rv	6.6738	27111.1
	region	NAF	EHO-rs	19.1016	17110.8								region	EAF	SHG-rv	6.6738	27124
	region	MEE	EHO-rs	19.1016	17110.8								region	WCA	SHG-rv	6.6738	27124
	region	MEE	EHO-rs	19.1016	17184.2								region	WCA	SHG-rv	6.6738	27174.9
	region	CHN	EHO-rs	19.1016	17184.2								region	SAF	SHG-rv	6.6738	27174.9
	region	CHN	EHO-rs	19.1016	17188.3								region	SAF	SHG-rv	6.6738	27187.8
	region	OEA	EHO-rs	19.1016	17188.3								region	MEE	SHG-rv	6.6738	27187.8
	region	OEA	EHO-rs	19.1016	17189.2								region	MEE	SHG-rv	6.6738	27213.2
	region	IND	EHO-rs	19.1016	17189.2								region	CHN	SHG-rv	6.6738	27213.2
	region	IND	EHO-rs	19.1016	17189.4								region	CHN	SHG-rv	6.6738	27226.1
	region	LAC	EHO-rs	19.1016	17189.4								region	OEA	SHG-rv	6.6738	27226.1
	region	LAC	EHO-rs	19.1016	17189.5								region	OEA	SHG-rv	6.6738	27238.9
	region	USA	TAO-rs	19.1016	17189.5								region	IND	SHG-rv	6.6738	27238.9
	region	USA	TAO-rs	19.1016	17196								region	IND	SHG-rv	6.6738	27251.7
	region	CAN	TAO-rs	19.1016	17196								region	OSA	SHG-rv	6.6738	27251.7
	region	CAN	TAO-rs	19.1016	17467.3								region	OSA	SHG-rv	6.6738	27290
	region	WEU	TAO-rs	19.1016	17467.3								region	OCN	SHG-rv	6.6738	27290
	region	WEU	TAO-rs	19.1016	17467.3								region	OCN	SHG-rv	6.6738	27315.5
	region	EEU	TAO-rs	19.1016	17467.3								region	PAS	SHG-rv	6.6738	27315.5
	region	EEU	TAO-rs	19.1016	17467.4								region	PAS	SHG-rv	6.6738	27328.3
	region	FSU	TAO-rs	19.1016	17467.4								region	LAC	SHG-rv	6.6738	27328.3
	region	FSU	TAO-rs	19.1016	17667.1								region	LAC	SHG-rv	6.6738	27353.8
	region	EAF	TAO-rs	19.1016	17667.1								region	USA	DEG-rv	6.81	27353.8
	region	EAF	TAO-rs	19.1016	17667.2								region	USA	DEG-rv	6.81	27465.5
	region	WCA	TAO-rs	19.1016	17667.2								region	CAN	DEG-rv	6.81	27465.5
	region	WCA	TAO-rs	19.1016	17667.6								region	CAN	DEG-rv	6.81	27493.4
	region	SAF	TAO-rs	19.1016	17667.6								region	WEU	DEG-rv	6.81	27493.4
	region	SAF	TAO-rs	19.1016	17667.8								region	WEU	DEG-rv	6.81	27510.2
	region	CHN	TAO-rs	19.1016	17667.8								region	EEU	DEG-rv	6.81	27510.2
	region	CHN	TAO-rs	19.1016	17667.9								region	EEU	DEG-rv	6.81	27527
	region	PAS	TAO-rs	19.1016	17667.9								region	FSU	DEG-rv	6.81	27527
	region	PAS	TAO-rs	19.1016	17668.1								region	FSU	DEG-rv	6.81	27694.7
	region	LAC	TAO-rs	19.1016	17668.1								region	NAF	DEG-rv	6.81	27694.7
	region	LAC	TAO-rs	19.1016	17849.6								region	NAF	DEG-rv	6.81	27750.7
	region	USA	SHO-rs	19.1016	17849.6								region	EAF	DEG-rv	6.81	27750.7
	region	USA	SHO-rs	19.1016	18183								region	EAF	DEG-rv	6.81	27767.5
	region	CAN	SHO-rs	19.1016	18183								region	WCA	DEG-rv	6.81	27767.5
	region	CAN	SHO-rs	19.1016	18185.4								region	WCA	DEG-rv	6.81	27806.6
	region	WEU	SHO-rs	19.1016	18185.4								region	SAF	DEG-rv	6.81	27806.6
	region	WEU	SHO-rs	19.1016	18196.6								region	SAF	DEG-rv	6.81	27817.9
	region	EEU	SHO-rs	19.1016	18196.6								region	MEE	DEG-rv	6.81	27817.9
	region	EEU	SHO-rs	19.1016	18196.7								region	MEE	DEG-rv	6.81	27857
	region	FSU	SHO-rs	19.1016	18196.7								region	CHN	DEG-rv	6.81	27857
	region	FSU	SHO-rs	19.1016	18248.2								region	CHN	DEG-rv	6.81	27868.3
	region	NAF	SHO-rs	19.1016	18248.2								region	IND	DEG-rv	6.81	27868.3
	region	NAF	SHO-rs	19.1016	18253.2								region	IND	DEG-rv	6.81	27879.5
	region	EAF	SHO-rs	19.1016	18253.2								region	OSA	DEG-rv	6.81	27879.5
	region	EAF	SHO-rs	19.1016	18253.2								region	OSA	DEG-rv	6.81	27907.4
	region	WCA	SHO-rs	19.1016	18253.2								region	OCN	DEG-rv	6.81	27907.4
	region	WCA	SHO-rs	19.1016	18269								region	OCN	DEG-rv	6.81	27918.7
	region	SAF	SHO-rs	19.1016	18269								region	PAS	DEG-rv	6.81	27918.7
	region	SAF	SHO-rs	19.1016	18269								region	PAS	DEG-rv	6.81	27929.9
	region	MEE	SHO-rs	19.1016	18269								region	LAC	DEG-rv	6.81	27929.9
	region	MEE	SHO-rs	19.1016	18275.4								region	LAC	DEG-rv	6.81	27963.5
	region	CHN	SHO-rs	19.1016	18275.4								region	USA	COG-rs	6.9174	27963.5
	region	CHN	SHO-rs	19.1016	18277.7								region	USA	COG-rs	6.9174	27988.1
	region	OEA	SHO-rs	19.1016	18277.7								region	CAN	COG-rs	6.9174	27988.1
	region	OEA	SHO-rs	19.1016	18277.7								region	CAN	COG-rs	6.9174	28018.1
	region	OCN	SHO-rs	19.1016	18277.7								region	WEU	COG-rs	6.9174	28018.1
	region	OCN	SHO-rs	19.1016	18281.4								region	WEU	COG-rs	6.9174	28037.7
	region	PAS	SHO-rs	19.1016	18281.4								region	EEU	COG-rs	6.9174	28037.7
	region	PAS	SHO-rs	19.1016	18282.4								region	EEU	COG-rs	6.9174	28040.1
	region	LAC	SHO-rs	19.1016	18282.4								region	NAF	COG-rs	6.9174	28040.1
	region	LAC	SHO-rs	19.1016	18292.2								region	NAF	COG-rs	6.9174	28064.9
	region	USA	EHO-rs	21.7069	18292.2								region	EAF	COG-rs	6.9174	28064.9
	region	USA	EHO-rs	21.7069	18383.1								region	EAF	COG-rs	6.9174	28066.6
	region	CAN	EHO-rs	21.7069	18383.1								region	SAF	COG-rs	6.9174	28066.6
	region	CAN	EHO-rs	21.7069	18434.4								region	SAF	COG-rs	6.9174	28067.7
	region	WEU	EHO-rs	21.7069	18434.4								region	CHN	COG-rs	6.9174	28067.7
	region	WEU	EHO-rs	21.7069	18434.8								region	CHN	COG-rs	6.9174	28087.1
	region	EEU	EHO-rs	21.7069	18434.8								region	OEA	COG-rs	6.9174	28087.1
	region	EEU	EHO-rs	21.7069	18434.8								region	OEA	COG-rs	6.9174	28090.2
	region	FSU	EHO-rs	21.7069	18434.8								region	IND	COG-rs	6.9174	28090.2
	region	FSU	EHO-rs	21.7069	18435								region	IND	COG-rs	6.9174	28092.4
	region	NAF	EHO-rs	21.7069	18435								region	OSA	COG-rs	6.9174	28092.4
	region	NAF	EHO-rs	21.7069	18435.3								region	OSA	COG-rs	6.9174	28095.4
	region	MEE	EHO-rs	21.7069	18435.3								region	PAS	COG-rs	6.9174	28095.4
	region	MEE	EHO-rs	21.7069	18508.7								region	PAS	COG-rs	6.9174	28102.2
	region	CHN	EHO-rs	21.7069	18508.7								region	LAC	COG-rs	6.9174	28102.2
	region	CHN	EHO-rs	21.7069	18512.8								region	LAC	COG-rs	6.9174	28124.5
	region	OEA	EHO-rs	21.7069	18512.8								region	ARC	COG-rs	6.9174	28124.5
	region	OEA	EHO-rs	21.7069	18514								region	ARC	COG-rs	6.9174	28288.4
	region	IND	EHO-rs	21.7069	18514								region	USA	COG-rs	7.5348	28288.4
	region	IND	EHO-rs	21.7069	18514.4								region	USA	COG-rs	7.5348	28313
	region	LAC	EHO-rs	21.7069	18514.4								region	CAN	COG-rs	7.5348	28313
	region	LAC	EHO-rs	21.7069	18514.4								region	CAN	COG-rs	7.5348	28343
	region	USA	TAO-rs	21.7069	18514.4								region	WEU	COG-rs	7.5348	28343
	region	USA	TAO-rs	21.7069	18520.9								region	WEU	COG-rs	7.5348	28362.6
	region	CAN	TAO-rs	21.7069	18520.9								region	EEU	COG-rs	7.5348	28362.6
	region	CAN	TAO-rs	21.7069	18792.2								region	EEU	COG-rs	7.5348	28365
	region	WEU	TAO-rs	21.7069	18792.2								region	NAF	COG-rs	7.5348	28365
	region	WEU	TAO-rs	21.7069	18792.3								region	NAF	COG-rs	7.5348	28389.8
	region	EEU	TAO-rs	21.7069	18792.3								region	EAF	COG-rs	7.5348	28389.8
	region	EEU	TAO-rs	21.7069	18792.3								region	EAF	COG-rs	7.5348	28391.5
	region	FSU	TAO-rs	21.7069	18792.3								region	SAF	COG-rs	7.5348	28391.5
	region	FSU	TAO-rs	21.7069	18992.1								region	SAF	COG-rs	7.5348	28392.6
	region	EAF	TAO-rs	21.7069	18992.1								region	CHN	COG-rs	7.5348	28392.6
	region	EAF	TAO-rs	21.7069	18992.2								region	CHN	COG-rs	7.5348	28412
	region	WCA	TAO-rs	21.7069	18992.2								region	OEA	COG-rs	7.5348	28412
	region	WCA	TAO-rs	21.7069	18992.5								region	OEA	COG-rs	7.5348	28415.1
	region	SAF	TAO-rs	21.7069	18992.5								region	IND	COG-rs	7.5348	28415.1
	region	SAF	TAO-rs	21.7069	18992.8								region	IND	COG-rs	7.5348	28417.3
	region	CHN	TAO-rs	21.7069	18992.8								region	OSA	COG-rs	7.5348	28417.3
	region	CHN	TAO-rs	21.7069	18992.9								region	OSA	COG-rs	7.5348	28420.2
	region	PAS	TAO-rs	21.7069	18992.9								region	PAS	COG-rs	7.5348	28420.2
	region	PAS	TAO-rs	21.7069	18993.1								region	PAS	COG-rs	7.5348	28427.1
	region	LAC	TAO-rs	21.7069	18993.1								region	LAC	COG-rs	7.5348	28427.1
	region	LAC	TAO-rs	21.7069	19174.7								region	LAC	COG-rs	7.5348	28449.4
	region	USA	SHO-rs	21.7069	19174.7								region	ARC	COG-rs	7.5348	28449.4
	region	USA	SHO-rs	21.7069	19508								region	ARC	COG-rs	7.5348	28613.3
	region	CAN	SHO-rs	21.7069	19508								region	USA	COG-rs	8.1522	28613.3
	region	CAN	SHO-rs	21.7069	19510.4								region	USA	COG-rs	8.1522	28637.8
	region	WEU	SHO-rs	21.7069	19510.4								region	CAN	COG-rs	8.1522	28637.8
	region	WEU	SHO-rs	21.7069	19521.6								region	CAN	COG-rs	8.1522	28667.9
	region	EEU	SHO-rs	21.7069	19521.6								region	WEU	COG-rs	8.1522	28667.9
	region	EEU	SHO-rs	21.7069	19521.7								region	WEU	COG-rs	8.1522	28687.4
	region	FSU	SHO-rs	21.7069	19521.7								region	EEU	COG-rs	8.1522	28687.4
	region	FSU	SHO-rs	21.7069	19573.3								region	EEU	COG-rs	8.1522	28689.9
	region	NAF	SHO-rs	21.7069	19573.3								region	NAF	COG-rs	8.1522	28689.9
	region	NAF	SHO-rs	21.7069	19583.2								region	NAF	COG-rs	8.1522	28714.7
	region	EAF	SHO-rs	21.7069	19583.2								region	EAF	COG-rs	8.1522	28714.7
	region	EAF	SHO-rs	21.7069	19583.2								region	EAF	COG-rs	8.1522	28716.4
	region	WCA	SHO-rs	21.7069	19583.2								region	SAF	COG-rs	8.1522	28716.4
	region	WCA	SHO-rs	21.7069	19599								region	SAF	COG-rs	8.1522	28717.5
	region	SAF	SHO-rs	21.7069	19599								region	CHN	COG-rs	8.1522	28717.5
	region	SAF	SHO-rs	21.7069	19599								region	CHN	COG-rs	8.1522	28736.8
	region	MEE	SHO-rs	21.7069	19599								region	OEA	COG-rs	8.1522	28736.8
	region	MEE	SHO-rs	21.7069	19605.4								region	OEA	COG-rs	8.1522	28740
	region	CHN	SHO-rs	21.7069	19605.4								region	IND	COG-rs	8.1522	28740
	region	CHN	SHO-rs	21.7069	19607.7								region	IND	COG-rs	8.1522	28742.2
	region	OEA	SHO-rs	21.7069	19607.7								region	OSA	COG-rs	8.1522	28742.2
	region	OEA	SHO-rs	21.7069	19607.7								region	OSA	COG-rs	8.1522	28745.1
	region	OCN	SHO-rs	21.7069	19607.7								region	PAS	COG-rs	8.1522	28745.1
	region	OCN	SHO-rs	21.7069	19612.7								region	PAS	COG-rs	8.1522	28752
	region	PAS	SHO-rs	21.7069	19612.7								region	LAC	COG-rs	8.1522	28752
	region	PAS	SHO-rs	21.7069	19614								region	LAC	COG-rs	8.1522	28774.3
	region	LAC	SHO-rs	21.7069	19614								region	ARC	COG-rs	8.1522	28774.3
	region	LAC	SHO-rs	21.7069	19623.8								region	ARC	COG-rs	8.1522	28938.2
	region	USA	EHO-rs	25.6148	19623.8								region	USA	SHG-rv	8.15556	28938.2
	region	USA	EHO-rs	25.6148	19828.3								region	USA	SHG-rv	8.15556	29203.7
	region	CAN	EHO-rs	25.6148	19828.3								region	CAN	SHG-rv	8.15556	29203.7
	region	CAN	EHO-rs	25.6148	19854								region	CAN	SHG-rv	8.15556	29230.2
	region	WEU	EHO-rs	25.6148	19854								region	WEU	SHG-rv	8.15556	29230.2
	region	WEU	EHO-rs	25.6148	19855.4								region	WEU	SHG-rv	8.15556	29262.1
	region	EEU	EHO-rs	25.6148	19855.4								region	EEU	SHG-rv	8.15556	29262.1
	region	EEU	EHO-rs	25.6148	19855.5								region	EEU	SHG-rv	8.15556	29294
	region	FSU	EHO-rs	25.6148	19855.5								region	FSU	SHG-rv	8.15556	29294
	region	FSU	EHO-rs	25.6148	19855.9								region	FSU	SHG-rv	8.15556	29612.5
	region	NAF	EHO-rs	25.6148	19855.9								region	NAF	SHG-rv	8.15556	29612.5
	region	NAF	EHO-rs	25.6148	19857								region	NAF	SHG-rv	8.15556	29633.7
	region	MEE	EHO-rs	25.6148	19857								region	EAF	SHG-rv	8.15556	29633.7
	region	MEE	EHO-rs	25.6148	19967.1								region	EAF	SHG-rv	8.15556	29644.4
	region	CHN	EHO-rs	25.6148	19967.1								region	WCA	SHG-rv	8.15556	29644.4
	region	CHN	EHO-rs	25.6148	19978.8								region	WCA	SHG-rv	8.15556	29686.9
	region	OEA	EHO-rs	25.6148	19978.8								region	SAF	SHG-rv	8.15556	29686.9
	region	OEA	EHO-rs	25.6148	19981.7								region	SAF	SHG-rv	8.15556	29697.6
	region	IND	EHO-rs	25.6148	19981.7								region	MEE	SHG-rv	8.15556	29697.6
	region	IND	EHO-rs	25.6148	19982.5								region	MEE	SHG-rv	8.15556	29718.8
	region	LAC	EHO-rs	25.6148	19982.5								region	CHN	SHG-rv	8.15556	29718.8
	region	LAC	EHO-rs	25.6148	19982.7								region	CHN	SHG-rv	8.15556	29729.5
	region	USA	TAO-rs	25.6148	19982.7								region	OEA	SHG-rv	8.15556	29729.5
	region	USA	TAO-rs	25.6148	19997.4								region	OEA	SHG-rv	8.15556	29740.2
	region	CAN	TAO-rs	25.6148	19997.4								region	IND	SHG-rv	8.15556	29740.2
	region	CAN	TAO-rs	25.6148	20133								region	IND	SHG-rv	8.15556	29750.9
	region	WEU	TAO-rs	25.6148	20133								region	OSA	SHG-rv	8.15556	29750.9
	region	WEU	TAO-rs	25.6148	20133.4								region	OSA	SHG-rv	8.15556	29782.8
	region	EEU	TAO-rs	25.6148	20133.4								region	OCN	SHG-rv	8.15556	29782.8
	region	EEU	TAO-rs	25.6148	20133.5								region	OCN	SHG-rv	8.15556	29804
	region	FSU	TAO-rs	25.6148	20133.5								region	PAS	SHG-rv	8.15556	29804
	region	FSU	TAO-rs	25.6148	20533								region	PAS	SHG-rv	8.15556	29814.7
	region	EAF	TAO-rs	25.6148	20533								region	LAC	SHG-rv	8.15556	29814.7
	region	EAF	TAO-rs	25.6148	20533.4								region	LAC	SHG-rv	8.15556	29835.9
	region	WCA	TAO-rs	25.6148	20533.4								region	USA	DEG-rv	8.322	29835.9
	region	WCA	TAO-rs	25.6148	20534								region	USA	DEG-rv	8.322	29929
	region	SAF	TAO-rs	25.6148	20534								region	CAN	DEG-rv	8.322	29929
	region	SAF	TAO-rs	25.6148	20534.5								region	CAN	DEG-rv	8.322	29952.3
	region	CHN	TAO-rs	25.6148	20534.5								region	WEU	DEG-rv	8.322	29952.3
	region	CHN	TAO-rs	25.6148	20534.8								region	WEU	DEG-rv	8.322	29966.3
	region	PAS	TAO-rs	25.6148	20534.8								region	EEU	DEG-rv	8.322	29966.3
	region	PAS	TAO-rs	25.6148	20535.3								region	EEU	DEG-rv	8.322	29980.3
	region	LAC	TAO-rs	25.6148	20535.3								region	FSU	DEG-rv	8.322	29980.3
	region	LAC	TAO-rs	25.6148	21019.4								region	FSU	DEG-rv	8.322	30120
	region	USA	SHO-rs	25.6148	21019.4								region	NAF	DEG-rv	8.322	30120
	region	USA	SHO-rs	25.6148	21769.4								region	NAF	DEG-rv	8.322	30166.7
	region	CAN	SHO-rs	25.6148	21769.4								region	EAF	DEG-rv	8.322	30166.7
	region	CAN	SHO-rs	25.6148	21770.6								region	EAF	DEG-rv	8.322	30180.7
	region	WEU	SHO-rs	25.6148	21770.6								region	WCA	DEG-rv	8.322	30180.7
	region	WEU	SHO-rs	25.6148	21815.5								region	WCA	DEG-rv	8.322	30213.3
	region	EEU	SHO-rs	25.6148	21815.5								region	SAF	DEG-rv	8.322	30213.3
	region	EEU	SHO-rs	25.6148	21815.7								region	SAF	DEG-rv	8.322	30222.7
	region	FSU	SHO-rs	25.6148	21815.7								region	MEE	DEG-rv	8.322	30222.7
	region	FSU	SHO-rs	25.6148	21918.8								region	MEE	DEG-rv	8.322	30255.3
	region	NAF	SHO-rs	25.6148	21918.8								region	CHN	DEG-rv	8.322	30255.3
	region	NAF	SHO-rs	25.6148	21953.6								region	CHN	DEG-rv	8.322	30264.7
	region	EAF	SHO-rs	25.6148	21953.6								region	IND	DEG-rv	8.322	30264.7
	region	EAF	SHO-rs	25.6148	21953.6								region	IND	DEG-rv	8.322	30274
	region	WCA	SHO-rs	25.6148	21953.6								region	OSA	DEG-rv	8.322	30274
	region	WCA	SHO-rs	25.6148	21985.2								region	OSA	DEG-rv	8.322	30297.3
	region	SAF	SHO-rs	25.6148	21985.2								region	OCN	DEG-rv	8.322	30297.3
	region	SAF	SHO-rs	25.6148	21985.3								region	OCN	DEG-rv	8.322	30306.7
	region	MEE	SHO-rs	25.6148	21985.3								region	PAS	DEG-rv	8.322	30306.7
	region	MEE	SHO-rs	25.6148	21994.9								region	PAS	DEG-rv	8.322	30316
	region	CHN	SHO-rs	25.6148	21994.9								region	LAC	DEG-rv	8.322	30316
	region	CHN	SHO-rs	25.6148	22001.2								region	LAC	DEG-rv	8.322	30344
	region	OEA	SHO-rs	25.6148	22001.2								region	USA	CMG-rs	8.447	30344
	region	OEA	SHO-rs	25.6148	22001.3								region	USA	CMG-rs	8.447	30396.9
	region	OCN	SHO-rs	25.6148	22001.3								region	CAN	CMG-rs	8.447	30396.9
	region	OCN	SHO-rs	25.6148	22013.9								region	CAN	CMG-rs	8.447	30414.5
	region	PAS	SHO-rs	25.6148	22013.9								region	WEU	CMG-rs	8.447	30414.5
	region	PAS	SHO-rs	25.6148	22016.5								region	WEU	CMG-rs	8.447	30432.1
	region	LAC	SHO-rs	25.6148	22016.5								region	EEU	CMG-rs	8.447	30432.1
	region	LAC	SHO-rs	25.6148	22042.6								region	EEU	CMG-rs	8.447	30437.9
	region	USA	EHO-rs	30.8253	22042.6								region	FSU	CMG-rs	8.447	30437.9
	region	USA	EHO-rs	30.8253	22144.9								region	FSU	CMG-rs	8.447	30496.6
	region	CAN	EHO-rs	30.8253	22144.9								region	NAF	CMG-rs	8.447	30496.6
	region	CAN	EHO-rs	30.8253	22337.3								region	NAF	CMG-rs	8.447	30508.4
	region	WEU	EHO-rs	30.8253	22337.3								region	EAF	CMG-rs	8.447	30508.4
	region	WEU	EHO-rs	30.8253	22337.7								region	EAF	CMG-rs	8.447	30514.2
	region	EEU	EHO-rs	30.8253	22337.7								region	WCA	CMG-rs	8.447	30514.2
	region	EEU	EHO-rs	30.8253	22337.7								region	WCA	CMG-rs	8.447	30520.1
	region	FSU	EHO-rs	30.8253	22337.7								region	SAF	CMG-rs	8.447	30520.1
	region	FSU	EHO-rs	30.8253	22338								region	SAF	CMG-rs	8.447	30526
	region	MEE	EHO-rs	30.8253	22338								region	MEE	CMG-rs	8.447	30526
	region	MEE	EHO-rs	30.8253	22503.1								region	MEE	CMG-rs	8.447	30531.8
	region	CHN	EHO-rs	30.8253	22503.1								region	CHN	CMG-rs	8.447	30531.8
	region	CHN	EHO-rs	30.8253	22508.4								region	CHN	CMG-rs	8.447	30578.8
	region	OEA	EHO-rs	30.8253	22508.4								region	OEA	CMG-rs	8.447	30578.8
	region	OEA	EHO-rs	30.8253	22509.7								region	OEA	CMG-rs	8.447	30579.9
	region	IND	EHO-rs	30.8253	22509.7								region	IND	CMG-rs	8.447	30579.9
	region	IND	EHO-rs	30.8253	22510.3								region	IND	CMG-rs	8.447	30597.5
	region	LAC	EHO-rs	30.8253	22510.3								region	OSA	CMG-rs	8.447	30597.5
	region	LAC	EHO-rs	30.8253	22510.4								region	OSA	CMG-rs	8.447	30601.1
	region	USA	TAO-rs	30.8253	22510.4								region	JPN	CMG-rs	8.447	30601.1
	region	USA	TAO-rs	30.8253	22517.8								region	JPN	CMG-rs	8.447	30604.6
	region	CAN	TAO-rs	30.8253	22517.8								region	OCN	CMG-rs	8.447	30604.6
	region	CAN	TAO-rs	30.8253	23534.9								region	OCN	CMG-rs	8.447	30616.3
	region	WEU	TAO-rs	30.8253	23534.9								region	PAS	CMG-rs	8.447	30616.3
	region	WEU	TAO-rs	30.8253	23535								region	PAS	CMG-rs	8.447	30619.9
	region	EEU	TAO-rs	30.8253	23535								region	LAC	CMG-rs	8.447	30619.9
	region	EEU	TAO-rs	30.8253	23535								region	LAC	CMG-rs	8.447	30637.5
	region	FSU	TAO-rs	30.8253	23535								region	USA	TIG-rs	8.447	30637.5
	region	FSU	TAO-rs	30.8253	23834.7								region	USA	TIG-rs	8.447	30682.1
	region	EAF	TAO-rs	30.8253	23834.7								region	CAN	TIG-rs	8.447	30682.1
	region	EAF	TAO-rs	30.8253	23834.8								region	CAN	TIG-rs	8.447	30707.9
	region	WCA	TAO-rs	30.8253	23834.8								region	WEU	TIG-rs	8.447	30707.9
	region	WCA	TAO-rs	30.8253	23835.3								region	WEU	TIG-rs	8.447	30713.8
	region	SAF	TAO-rs	30.8253	23835.3								region	EEU	TIG-rs	8.447	30713.8
	region	SAF	TAO-rs	30.8253	23835.7								region	EEU	TIG-rs	8.447	30719.6
	region	CHN	TAO-rs	30.8253	23835.7								region	FSU	TIG-rs	8.447	30719.6
	region	CHN	TAO-rs	30.8253	23835.8								region	FSU	TIG-rs	8.447	30760.7
	region	PAS	TAO-rs	30.8253	23835.8								region	NAF	TIG-rs	8.447	30760.7
	region	PAS	TAO-rs	30.8253	23836.3								region	NAF	TIG-rs	8.447	30772.4
	region	LAC	TAO-rs	30.8253	23836.3								region	EAF	TIG-rs	8.447	30772.4
	region	LAC	TAO-rs	30.8253	24380.9								region	EAF	TIG-rs	8.447	30778.3
	region	USA	SHO-rs	30.8253	24380.9								region	WCA	TIG-rs	8.447	30778.3
	region	USA	SHO-rs	30.8253	24755.9								region	WCA	TIG-rs	8.447	30795.9
	region	CAN	SHO-rs	30.8253	24755.9								region	SAF	TIG-rs	8.447	30795.9
	region	CAN	SHO-rs	30.8253	24765								region	SAF	TIG-rs	8.447	30801.8
	region	WEU	SHO-rs	30.8253	24765								region	MEE	TIG-rs	8.447	30801.8
	region	WEU	SHO-rs	30.8253	24776.2								region	MEE	TIG-rs	8.447	30825.2
	region	EEU	SHO-rs	30.8253	24776.2								region	CHN	TIG-rs	8.447	30825.2
	region	EEU	SHO-rs	30.8253	24776.3								region	CHN	TIG-rs	8.447	30831.1
	region	FSU	SHO-rs	30.8253	24776.3								region	OEA	TIG-rs	8.447	30831.1
	region	FSU	SHO-rs	30.8253	24853.6								region	OEA	TIG-rs	8.447	30837
	region	EAF	SHO-rs	30.8253	24853.6								region	IND	TIG-rs	8.447	30837
	region	EAF	SHO-rs	30.8253	24853.6								region	IND	TIG-rs	8.447	30842.8
	region	WCA	SHO-rs	30.8253	24853.6								region	OSA	TIG-rs	8.447	30842.8
	region	WCA	SHO-rs	30.8253	24877.4								region	OSA	TIG-rs	8.447	30854.6
	region	SAF	SHO-rs	30.8253	24877.4								region	OCN	TIG-rs	8.447	30854.6
	region	SAF	SHO-rs	30.8253	24877.4								region	OCN	TIG-rs	8.447	30860.4
	region	MEE	SHO-rs	30.8253	24877.4								region	PAS	TIG-rs	8.447	30860.4
	region	MEE	SHO-rs	30.8253	24891.8								region	PAS	TIG-rs	8.447	30872.2
	region	CHN	SHO-rs	30.8253	24891.8								region	LAC	TIG-rs	8.447	30872.2
	region	CHN	SHO-rs	30.8253	24894.7								region	LAC	TIG-rs	8.447	30889.8
	region	OEA	SHO-rs	30.8253	24894.7								region	USA	CMG-rs	10.1858	30889.8
	region	OEA	SHO-rs	30.8253	24894.7								region	USA	CMG-rs	10.1858	30942.6
	region	OCN	SHO-rs	30.8253	24894.7								region	CAN	CMG-rs	10.1858	30942.6
	region	OCN	SHO-rs	30.8253	24900.3								region	CAN	CMG-rs	10.1858	30960.2
	region	PAS	SHO-rs	30.8253	24900.3								region	WEU	CMG-rs	10.1858	30960.2
	region	PAS	SHO-rs	30.8253	24902.8								region	WEU	CMG-rs	10.1858	30977.8
	region	LAC	SHO-rs	30.8253	24902.8								region	EEU	CMG-rs	10.1858	30977.8
	region	LAC	SHO-rs	30.8253	24932.2								region	EEU	CMG-rs	10.1858	30983.7
	region	USA	EHO-rs	37.3385	24932.2								region	FSU	CMG-rs	10.1858	30983.7
	region	USA	EHO-rs	37.3385	25068.5								region	FSU	CMG-rs	10.1858	31042.4
	region	CAN	EHO-rs	37.3385	25068.5								region	NAF	CMG-rs	10.1858	31042.4
	region	CAN	EHO-rs	37.3385	25145.5								region	NAF	CMG-rs	10.1858	31054.1
	region	WEU	EHO-rs	37.3385	25145.5								region	EAF	CMG-rs	10.1858	31054.1
	region	WEU	EHO-rs	37.3385	25146								region	EAF	CMG-rs	10.1858	31060
	region	EEU	EHO-rs	37.3385	25146								region	WCA	CMG-rs	10.1858	31060
	region	EEU	EHO-rs	37.3385	25146.1								region	WCA	CMG-rs	10.1858	31065.8
	region	FSU	EHO-rs	37.3385	25146.1								region	SAF	CMG-rs	10.1858	31065.8
	region	FSU	EHO-rs	37.3385	25146.4								region	SAF	CMG-rs	10.1858	31071.7
	region	NAF	EHO-rs	37.3385	25146.4								region	MEE	CMG-rs	10.1858	31071.7
	region	NAF	EHO-rs	37.3385	25146.6								region	MEE	CMG-rs	10.1858	31077.6
	region	MEE	EHO-rs	37.3385	25146.6								region	CHN	CMG-rs	10.1858	31077.6
	region	MEE	EHO-rs	37.3385	25256.7								region	CHN	CMG-rs	10.1858	31124.5
	region	CHN	EHO-rs	37.3385	25256.7								region	OEA	CMG-rs	10.1858	31124.5
	region	CHN	EHO-rs	37.3385	25262.8								region	OEA	CMG-rs	10.1858	31125.7
	region	OEA	EHO-rs	37.3385	25262.8								region	IND	CMG-rs	10.1858	31125.7
	region	OEA	EHO-rs	37.3385	25264.1								region	IND	CMG-rs	10.1858	31143.3
	region	IND	EHO-rs	37.3385	25264.1								region	OSA	CMG-rs	10.1858	31143.3
	region	IND	EHO-rs	37.3385	25264.6								region	OSA	CMG-rs	10.1858	31146.8
	region	LAC	EHO-rs	37.3385	25264.6								region	JPN	CMG-rs	10.1858	31146.8
	region	LAC	EHO-rs	37.3385	25264.6								region	JPN	CMG-rs	10.1858	31150.3
	region	USA	TAO-rs	37.3385	25264.6								region	OCN	CMG-rs	10.1858	31150.3
	region	USA	TAO-rs	37.3385	25274.4								region	OCN	CMG-rs	10.1858	31162.1
	region	CAN	TAO-rs	37.3385	25274.4								region	PAS	CMG-rs	10.1858	31162.1
	region	CAN	TAO-rs	37.3385	25681.3								region	PAS	CMG-rs	10.1858	31165.6
	region	WEU	TAO-rs	37.3385	25681.3								region	LAC	CMG-rs	10.1858	31165.6
	region	WEU	TAO-rs	37.3385	25681.4								region	LAC	CMG-rs	10.1858	31183.2
	region	EEU	TAO-rs	37.3385	25681.4								region	USA	TIG-rs	10.1858	31183.2
	region	EEU	TAO-rs	37.3385	25681.4								region	USA	TIG-rs	10.1858	31227.8
	region	FSU	TAO-rs	37.3385	25681.4								region	CAN	TIG-rs	10.1858	31227.8
	region	FSU	TAO-rs	37.3385	25981.1								region	CAN	TIG-rs	10.1858	31253.6
	region	EAF	TAO-rs	37.3385	25981.1								region	WEU	TIG-rs	10.1858	31253.6
	region	EAF	TAO-rs	37.3385	25981.2								region	WEU	TIG-rs	10.1858	31259.5
	region	WCA	TAO-rs	37.3385	25981.2								region	EEU	TIG-rs	10.1858	31259.5
	region	WCA	TAO-rs	37.3385	25981.7								region	EEU	TIG-rs	10.1858	31265.4
	region	SAF	TAO-rs	37.3385	25981.7								region	FSU	TIG-rs	10.1858	31265.4
	region	SAF	TAO-rs	37.3385	25982.1								region	FSU	TIG-rs	10.1858	31306.4
	region	CHN	TAO-rs	37.3385	25982.1								region	NAF	TIG-rs	10.1858	31306.4
	region	CHN	TAO-rs	37.3385	25982.3								region	NAF	TIG-rs	10.1858	31318.2
	region	PAS	TAO-rs	37.3385	25982.3								region	EAF	TIG-rs	10.1858	31318.2
	region	PAS	TAO-rs	37.3385	25982.5								region	EAF	TIG-rs	10.1858	31324
	region	LAC	TAO-rs	37.3385	25982.5								region	WCA	TIG-rs	10.1858	31324
	region	LAC	TAO-rs	37.3385	26254.9								region	WCA	TIG-rs	10.1858	31341.7
	region	USA	SHO-rs	37.3385	26254.9								region	SAF	TIG-rs	10.1858	31341.7
	region	USA	SHO-rs	37.3385	26754.8								region	SAF	TIG-rs	10.1858	31347.5
	region	CAN	SHO-rs	37.3385	26754.8								region	MEE	TIG-rs	10.1858	31347.5
	region	CAN	SHO-rs	37.3385	26758.5								region	MEE	TIG-rs	10.1858	31371
	region	WEU	SHO-rs	37.3385	26758.5								region	CHN	TIG-rs	10.1858	31371
	region	WEU	SHO-rs	37.3385	26775.3								region	CHN	TIG-rs	10.1858	31376.8
	region	EEU	SHO-rs	37.3385	26775.3								region	OEA	TIG-rs	10.1858	31376.8
	region	EEU	SHO-rs	37.3385	26775.4								region	OEA	TIG-rs	10.1858	31382.7
	region	FSU	SHO-rs	37.3385	26775.4								region	IND	TIG-rs	10.1858	31382.7
	region	FSU	SHO-rs	37.3385	26852.7								region	IND	TIG-rs	10.1858	31388.6
	region	NAF	SHO-rs	37.3385	26852.7								region	OSA	TIG-rs	10.1858	31388.6
	region	NAF	SHO-rs	37.3385	26860.2								region	OSA	TIG-rs	10.1858	31400.3
	region	EAF	SHO-rs	37.3385	26860.2								region	OCN	TIG-rs	10.1858	31400.3
	region	EAF	SHO-rs	37.3385	26860.2								region	OCN	TIG-rs	10.1858	31406.2
	region	WCA	SHO-rs	37.3385	26860.2								region	PAS	TIG-rs	10.1858	31406.2
	region	WCA	SHO-rs	37.3385	26883.9								region	PAS	TIG-rs	10.1858	31417.9
	region	SAF	SHO-rs	37.3385	26883.9								region	LAC	TIG-rs	10.1858	31417.9
	region	SAF	SHO-rs	37.3385	26883.9								region	LAC	TIG-rs	10.1858	31435.5
	region	MEE	SHO-rs	37.3385	26883.9								region	USA	CMG-rs	12.0985	31435.5
	region	MEE	SHO-rs	37.3385	26893.5								region	USA	CMG-rs	12.0985	31482.5
	region	CHN	SHO-rs	37.3385	26893.5								region	CAN	CMG-rs	12.0985	31482.5
	region	CHN	SHO-rs	37.3385	26896.9								region	CAN	CMG-rs	12.0985	31498.1
	region	OEA	SHO-rs	37.3385	26896.9								region	WEU	CMG-rs	12.0985	31498.1
	region	OEA	SHO-rs	37.3385	26896.9								region	WEU	CMG-rs	12.0985	31513.8
	region	OCN	SHO-rs	37.3385	26896.9								region	EEU	CMG-rs	12.0985	31513.8
	region	OCN	SHO-rs	37.3385	26902.6								region	EEU	CMG-rs	12.0985	31519
	region	PAS	SHO-rs	37.3385	26902.6								region	FSU	CMG-rs	12.0985	31519
	region	PAS	SHO-rs	37.3385	26904.1								region	FSU	CMG-rs	12.0985	31571.2
	region	LAC	SHO-rs	37.3385	26904.1								region	NAF	CMG-rs	12.0985	31571.2
	region	LAC	SHO-rs	37.3385	26918.7								region	NAF	CMG-rs	12.0985	31581.6
	region	USA	EHO-rs	45.1542	26918.7								region	EAF	CMG-rs	12.0985	31581.6
	region	USA	EHO-rs	45.1542	27055.1								region	EAF	CMG-rs	12.0985	31586.8
	region	CAN	EHO-rs	45.1542	27055.1								region	WCA	CMG-rs	12.0985	31586.8
	region	CAN	EHO-rs	45.1542	27132								region	WCA	CMG-rs	12.0985	31592
	region	WEU	EHO-rs	45.1542	27132								region	SAF	CMG-rs	12.0985	31592
	region	WEU	EHO-rs	45.1542	27132.6								region	SAF	CMG-rs	12.0985	31597.2
	region	EEU	EHO-rs	45.1542	27132.6								region	MEE	CMG-rs	12.0985	31597.2
	region	EEU	EHO-rs	45.1542	27132.6								region	MEE	CMG-rs	12.0985	31602.4
	region	FSU	EHO-rs	45.1542	27132.6								region	CHN	CMG-rs	12.0985	31602.4
	region	FSU	EHO-rs	45.1542	27132.9								region	CHN	CMG-rs	12.0985	31644.2
	region	NAF	EHO-rs	45.1542	27132.9								region	OEA	CMG-rs	12.0985	31644.2
	region	NAF	EHO-rs	45.1542	27133.4								region	OEA	CMG-rs	12.0985	31645.2
	region	MEE	EHO-rs	45.1542	27133.4								region	IND	CMG-rs	12.0985	31645.2
	region	MEE	EHO-rs	45.1542	27243.5								region	IND	CMG-rs	12.0985	31660.8
	region	CHN	EHO-rs	45.1542	27243.5								region	OSA	CMG-rs	12.0985	31660.8
	region	CHN	EHO-rs	45.1542	27249.6								region	OSA	CMG-rs	12.0985	31664
	region	OEA	EHO-rs	45.1542	27249.6								region	JPN	CMG-rs	12.0985	31664
	region	OEA	EHO-rs	45.1542	27251.4								region	JPN	CMG-rs	12.0985	31667.1
	region	IND	EHO-rs	45.1542	27251.4								region	OCN	CMG-rs	12.0985	31667.1
	region	IND	EHO-rs	45.1542	27251.9								region	OCN	CMG-rs	12.0985	31677.6
	region	LAC	EHO-rs	45.1542	27251.9								region	PAS	CMG-rs	12.0985	31677.6
	region	LAC	EHO-rs	45.1542	27252								region	PAS	CMG-rs	12.0985	31680.7
	region	USA	TAO-rs	45.1542	27252								region	LAC	CMG-rs	12.0985	31680.7
	region	USA	TAO-rs	45.1542	27261.8								region	LAC	CMG-rs	12.0985	31696.3
	region	CAN	TAO-rs	45.1542	27261.8								region	USA	TIG-rs	12.0985	31696.3
	region	CAN	TAO-rs	45.1542	27668.6								region	USA	TIG-rs	12.0985	31736
	region	WEU	TAO-rs	45.1542	27668.6								region	CAN	TIG-rs	12.0985	31736
	region	WEU	TAO-rs	45.1542	27668.8								region	CAN	TIG-rs	12.0985	31759
	region	EEU	TAO-rs	45.1542	27668.8								region	WEU	TIG-rs	12.0985	31759
	region	EEU	TAO-rs	45.1542	27668.8								region	WEU	TIG-rs	12.0985	31764.2
	region	FSU	TAO-rs	45.1542	27668.8								region	EEU	TIG-rs	12.0985	31764.2
	region	FSU	TAO-rs	45.1542	27968.5								region	EEU	TIG-rs	12.0985	31769.4
	region	EAF	TAO-rs	45.1542	27968.5								region	FSU	TIG-rs	12.0985	31769.4
	region	EAF	TAO-rs	45.1542	27968.7								region	FSU	TIG-rs	12.0985	31805.9
	region	WCA	TAO-rs	45.1542	27968.7								region	NAF	TIG-rs	12.0985	31805.9
	region	WCA	TAO-rs	45.1542	27969.2								region	NAF	TIG-rs	12.0985	31816.3
	region	SAF	TAO-rs	45.1542	27969.2								region	EAF	TIG-rs	12.0985	31816.3
	region	SAF	TAO-rs	45.1542	27969.6								region	EAF	TIG-rs	12.0985	31821.5
	region	CHN	TAO-rs	45.1542	27969.6								region	WCA	TIG-rs	12.0985	31821.5
	region	CHN	TAO-rs	45.1542	27969.7								region	WCA	TIG-rs	12.0985	31837.2
	region	PAS	TAO-rs	45.1542	27969.7								region	SAF	TIG-rs	12.0985	31837.2
	region	PAS	TAO-rs	45.1542	27970.1								region	SAF	TIG-rs	12.0985	31842.4
	region	LAC	TAO-rs	45.1542	27970.1								region	MEE	TIG-rs	12.0985	31842.4
	region	LAC	TAO-rs	45.1542	28242.4								region	MEE	TIG-rs	12.0985	31863.3
	region	USA	SHO-rs	45.1542	28242.4								region	CHN	TIG-rs	12.0985	31863.3
	region	USA	SHO-rs	45.1542	28742.4								region	CHN	TIG-rs	12.0985	31868.5
	region	CAN	SHO-rs	45.1542	28742.4								region	OEA	TIG-rs	12.0985	31868.5
	region	CAN	SHO-rs	45.1542	28746								region	OEA	TIG-rs	12.0985	31873.7
	region	WEU	SHO-rs	45.1542	28746								region	IND	TIG-rs	12.0985	31873.7
	region	WEU	SHO-rs	45.1542	28762.8								region	IND	TIG-rs	12.0985	31878.9
	region	EEU	SHO-rs	45.1542	28762.8								region	OSA	TIG-rs	12.0985	31878.9
	region	EEU	SHO-rs	45.1542	28762.9								region	OSA	TIG-rs	12.0985	31889.3
	region	FSU	SHO-rs	45.1542	28762.9								region	OCN	TIG-rs	12.0985	31889.3
	region	FSU	SHO-rs	45.1542	28840.3								region	OCN	TIG-rs	12.0985	31894.5
	region	NAF	SHO-rs	45.1542	28840.3								region	PAS	TIG-rs	12.0985	31894.5
	region	NAF	SHO-rs	45.1542	28855.2								region	PAS	TIG-rs	12.0985	31905
	region	EAF	SHO-rs	45.1542	28855.2								region	LAC	TIG-rs	12.0985	31905
	region	EAF	SHO-rs	45.1542	28855.2								region	LAC	TIG-rs	12.0985	31920.6
	region	WCA	SHO-rs	45.1542	28855.2								region	USA	DEG-rs	12.1637	31920.6
	region	WCA	SHO-rs	45.1542	28878.9								region	USA	DEG-rs	12.1637	31928.2
	region	SAF	SHO-rs	45.1542	28878.9								region	CAN	DEG-rs	12.1637	31928.2
	region	SAF	SHO-rs	45.1542	28878.9								region	CAN	DEG-rs	12.1637	31929.8
	region	MEE	SHO-rs	45.1542	28878.9								region	WEU	DEG-rs	12.1637	31929.8
	region	MEE	SHO-rs	45.1542	28888.5								region	WEU	DEG-rs	12.1637	31930.7
	region	CHN	SHO-rs	45.1542	28888.5								region	EEU	DEG-rs	12.1637	31930.7
	region	CHN	SHO-rs	45.1542	28891.9								region	EEU	DEG-rs	12.1637	31931.5
	region	OEA	SHO-rs	45.1542	28891.9								region	FSU	DEG-rs	12.1637	31931.5
	region	OEA	SHO-rs	45.1542	28891.9								region	FSU	DEG-rs	12.1637	31939.9
	region	OCN	SHO-rs	45.1542	28891.9								region	NAF	DEG-rs	12.1637	31939.9
	region	OCN	SHO-rs	45.1542	28899.5								region	NAF	DEG-rs	12.1637	31942.4
	region	PAS	SHO-rs	45.1542	28899.5								region	EAF	DEG-rs	12.1637	31942.4
	region	PAS	SHO-rs	45.1542	28901.4								region	EAF	DEG-rs	12.1637	31943.3
	region	LAC	SHO-rs	45.1542	28901.4								region	WCA	DEG-rs	12.1637	31943.3
	region	LAC	SHO-rs	45.1542	28916.1								region	WCA	DEG-rs	12.1637	31945.8
	region	USA	EHO-rs	53.6214	28916.1								region	SAF	DEG-rs	12.1637	31945.8
	region	USA	EHO-rs	53.6214	29222.9								region	SAF	DEG-rs	12.1637	31946.6
	region	CAN	EHO-rs	53.6214	29222.9								region	MEE	DEG-rs	12.1637	31946.6
	region	CAN	EHO-rs	53.6214	29261.4								region	MEE	DEG-rs	12.1637	31949.1
	region	WEU	EHO-rs	53.6214	29261.4								region	CHN	DEG-rs	12.1637	31949.1
	region	WEU	EHO-rs	53.6214	29263.5								region	CHN	DEG-rs	12.1637	31950
	region	EEU	EHO-rs	53.6214	29263.5								region	OEA	DEG-rs	12.1637	31950
	region	EEU	EHO-rs	53.6214	29263.6								region	OEA	DEG-rs	12.1637	31950.1
	region	FSU	EHO-rs	53.6214	29263.6								region	IND	DEG-rs	12.1637	31950.1
	region	FSU	EHO-rs	53.6214	29264.2								region	IND	DEG-rs	12.1637	31951
	region	NAF	EHO-rs	53.6214	29264.2								region	OSA	DEG-rs	12.1637	31951
	region	NAF	EHO-rs	53.6214	29265.9								region	OSA	DEG-rs	12.1637	31952.6
	region	MEE	EHO-rs	53.6214	29265.9								region	OCN	DEG-rs	12.1637	31952.6
	region	MEE	EHO-rs	53.6214	29431								region	OCN	DEG-rs	12.1637	31953.5
	region	CHN	EHO-rs	53.6214	29431								region	PAS	DEG-rs	12.1637	31953.5
	region	CHN	EHO-rs	53.6214	29448.5								region	PAS	DEG-rs	12.1637	31954.3
	region	OEA	EHO-rs	53.6214	29448.5								region	LAC	DEG-rs	12.1637	31954.3
	region	OEA	EHO-rs	53.6214	29453								region	LAC	DEG-rs	12.1637	31956.8
	region	IND	EHO-rs	53.6214	29453								region	USA	SHG-rs	12.6367	31956.8
	region	IND	EHO-rs	53.6214	29454.2								region	USA	SHG-rs	12.6367	32030.6
	region	LAC	EHO-rs	53.6214	29454.2								region	CAN	SHG-rs	12.6367	32030.6
	region	LAC	EHO-rs	53.6214	29454.5								region	CAN	SHG-rs	12.6367	32050.7
	region	USA	TAO-rs	53.6214	29454.5								region	WEU	SHG-rs	12.6367	32050.7
	region	USA	TAO-rs	53.6214	29476.5								region	WEU	SHG-rs	12.6367	32083.6
	region	CAN	TAO-rs	53.6214	29476.5								region	EEU	SHG-rs	12.6367	32083.6
	region	CAN	TAO-rs	53.6214	29679.9								region	EEU	SHG-rs	12.6367	32093.7
	region	WEU	TAO-rs	53.6214	29679.9								region	FSU	SHG-rs	12.6367	32093.7
	region	WEU	TAO-rs	53.6214	29680.4								region	FSU	SHG-rs	12.6367	32190.9
	region	EEU	TAO-rs	53.6214	29680.4								region	NAF	SHG-rs	12.6367	32190.9
	region	EEU	TAO-rs	53.6214	29680.6								region	NAF	SHG-rs	12.6367	32229.7
	region	FSU	TAO-rs	53.6214	29680.6								region	EAF	SHG-rs	12.6367	32229.7
	region	FSU	TAO-rs	53.6214	30280								region	EAF	SHG-rs	12.6367	32233.1
	region	EAF	TAO-rs	53.6214	30280								region	WCA	SHG-rs	12.6367	32233.1
	region	EAF	TAO-rs	53.6214	30280.4								region	WCA	SHG-rs	12.6367	32246.5
	region	WCA	TAO-rs	53.6214	30280.4								region	SAF	SHG-rs	12.6367	32246.5
	region	WCA	TAO-rs	53.6214	30281.4								region	SAF	SHG-rs	12.6367	32285.8
	region	SAF	TAO-rs	53.6214	30281.4								region	MEE	SHG-rs	12.6367	32285.8
	region	SAF	TAO-rs	53.6214	30282.2								region	MEE	SHG-rs	12.6367	32292.5
	region	CHN	TAO-rs	53.6214	30282.2								region	CHN	SHG-rs	12.6367	32292.5
	region	CHN	TAO-rs	53.6214	30282.6								region	CHN	SHG-rs	12.6367	32406.8
	region	PAS	TAO-rs	53.6214	30282.6								region	OEA	SHG-rs	12.6367	32406.8
	region	PAS	TAO-rs	53.6214	30283.3								region	OEA	SHG-rs	12.6367	32410.2
	region	LAC	TAO-rs	53.6214	30283.3								region	IND	SHG-rs	12.6367	32410.2
	region	LAC	TAO-rs	53.6214	31009.5								region	IND	SHG-rs	12.6367	32413.5
	region	USA	SHO-rs	53.6214	31009.5								region	OSA	SHG-rs	12.6367	32413.5
	region	USA	SHO-rs	53.6214	32134.5								region	OSA	SHG-rs	12.6367	32423.6
	region	CAN	SHO-rs	53.6214	32134.5								region	OCN	SHG-rs	12.6367	32423.6
	region	CAN	SHO-rs	53.6214	32136.3								region	OCN	SHG-rs	12.6367	32447.8
	region	WEU	SHO-rs	53.6214	32136.3								region	PAS	SHG-rs	12.6367	32447.8
	region	WEU	SHO-rs	53.6214	32203.6								region	PAS	SHG-rs	12.6367	32451.1
	region	EEU	SHO-rs	53.6214	32203.6								region	LAC	SHG-rs	12.6367	32451.1
	region	EEU	SHO-rs	53.6214	32204								region	LAC	SHG-rs	12.6367	32618.7
	region	FSU	SHO-rs	53.6214	32204								region	USA	CMG-rs	14.2024	32618.7
	region	FSU	SHO-rs	53.6214	32358.7								region	USA	CMG-rs	14.2024	32665.6
	region	NAF	SHO-rs	53.6214	32358.7								region	CAN	CMG-rs	14.2024	32665.6
	region	NAF	SHO-rs	53.6214	32410.8								region	CAN	CMG-rs	14.2024	32681.3
	region	EAF	SHO-rs	53.6214	32410.8								region	WEU	CMG-rs	14.2024	32681.3
	region	EAF	SHO-rs	53.6214	32410.8								region	WEU	CMG-rs	14.2024	32696.9
	region	WCA	SHO-rs	53.6214	32410.8								region	EEU	CMG-rs	14.2024	32696.9
	region	WCA	SHO-rs	53.6214	32458.3								region	EEU	CMG-rs	14.2024	32702.1
	region	SAF	SHO-rs	53.6214	32458.3								region	FSU	CMG-rs	14.2024	32702.1
	region	SAF	SHO-rs	53.6214	32458.3								region	FSU	CMG-rs	14.2024	32754.3
	region	MEE	SHO-rs	53.6214	32458.3								region	NAF	CMG-rs	14.2024	32754.3
	region	MEE	SHO-rs	53.6214	32472.7								region	NAF	CMG-rs	14.2024	32764.7
	region	CHN	SHO-rs	53.6214	32472.7								region	EAF	CMG-rs	14.2024	32764.7
	region	CHN	SHO-rs	53.6214	32482.2								region	EAF	CMG-rs	14.2024	32770
	region	OEA	SHO-rs	53.6214	32482.2								region	WCA	CMG-rs	14.2024	32770
	region	OEA	SHO-rs	53.6214	32482.4								region	WCA	CMG-rs	14.2024	32775.2
	region	OCN	SHO-rs	53.6214	32482.4								region	SAF	CMG-rs	14.2024	32775.2
	region	OCN	SHO-rs	53.6214	32501.2								region	SAF	CMG-rs	14.2024	32780.4
	region	PAS	SHO-rs	53.6214	32501.2								region	MEE	CMG-rs	14.2024	32780.4
	region	PAS	SHO-rs	53.6214	32505.2								region	MEE	CMG-rs	14.2024	32785.6
	region	LAC	SHO-rs	53.6214	32505.2								region	CHN	CMG-rs	14.2024	32785.6
	region	LAC	SHO-rs	53.6214	32544.3								region	CHN	CMG-rs	14.2024	32827.3
													region	OEA	CMG-rs	14.2024	32827.3
													region	OEA	CMG-rs	14.2024	32828.3
													region	IND	CMG-rs	14.2024	32828.3
													region	IND	CMG-rs	14.2024	32844
													region	OSA	CMG-rs	14.2024	32844
													region	OSA	CMG-rs	14.2024	32847.1
													region	JPN	CMG-rs	14.2024	32847.1
													region	JPN	CMG-rs	14.2024	32850.3
													region	OCN	CMG-rs	14.2024	32850.3
													region	OCN	CMG-rs	14.2024	32860.7
													region	PAS	CMG-rs	14.2024	32860.7
													region	PAS	CMG-rs	14.2024	32863.8
													region	LAC	CMG-rs	14.2024	32863.8
													region	LAC	CMG-rs	14.2024	32879.5
													region	USA	TIG-rs	14.2024	32879.5
													region	USA	TIG-rs	14.2024	32919.1
													region	CAN	TIG-rs	14.2024	32919.1
													region	CAN	TIG-rs	14.2024	32942.1
													region	WEU	TIG-rs	14.2024	32942.1
													region	WEU	TIG-rs	14.2024	32947.3
													region	EEU	TIG-rs	14.2024	32947.3
													region	EEU	TIG-rs	14.2024	32952.5
													region	FSU	TIG-rs	14.2024	32952.5
													region	FSU	TIG-rs	14.2024	32989
													region	NAF	TIG-rs	14.2024	32989
													region	NAF	TIG-rs	14.2024	32999.5
													region	EAF	TIG-rs	14.2024	32999.5
													region	EAF	TIG-rs	14.2024	33004.7
													region	WCA	TIG-rs	14.2024	33004.7
													region	WCA	TIG-rs	14.2024	33020.3
													region	SAF	TIG-rs	14.2024	33020.3
													region	SAF	TIG-rs	14.2024	33025.5
													region	MEE	TIG-rs	14.2024	33025.5
													region	MEE	TIG-rs	14.2024	33046.4
													region	CHN	TIG-rs	14.2024	33046.4
													region	CHN	TIG-rs	14.2024	33051.6
													region	OEA	TIG-rs	14.2024	33051.6
													region	OEA	TIG-rs	14.2024	33056.8
													region	IND	TIG-rs	14.2024	33056.8
													region	IND	TIG-rs	14.2024	33062
													region	OSA	TIG-rs	14.2024	33062
													region	OSA	TIG-rs	14.2024	33072.5
													region	OCN	TIG-rs	14.2024	33072.5
													region	OCN	TIG-rs	14.2024	33077.7
													region	PAS	TIG-rs	14.2024	33077.7
													region	PAS	TIG-rs	14.2024	33088.1
													region	LAC	TIG-rs	14.2024	33088.1
													region	LAC	TIG-rs	14.2024	33103.8
													region	USA	DEG-rs	14.6676	33103.8
													region	USA	DEG-rs	14.6676	33111.3
													region	CAN	DEG-rs	14.6676	33111.3
													region	CAN	DEG-rs	14.6676	33113
													region	WEU	DEG-rs	14.6676	33113
													region	WEU	DEG-rs	14.6676	33113.8
													region	EEU	DEG-rs	14.6676	33113.8
													region	EEU	DEG-rs	14.6676	33114.7
													region	FSU	DEG-rs	14.6676	33114.7
													region	FSU	DEG-rs	14.6676	33123.1
													region	NAF	DEG-rs	14.6676	33123.1
													region	NAF	DEG-rs	14.6676	33125.6
													region	EAF	DEG-rs	14.6676	33125.6
													region	EAF	DEG-rs	14.6676	33126.4
													region	WCA	DEG-rs	14.6676	33126.4
													region	WCA	DEG-rs	14.6676	33128.9
													region	SAF	DEG-rs	14.6676	33128.9
													region	SAF	DEG-rs	14.6676	33129.8
													region	MEE	DEG-rs	14.6676	33129.8
													region	MEE	DEG-rs	14.6676	33132.3
													region	CHN	DEG-rs	14.6676	33132.3
													region	CHN	DEG-rs	14.6676	33133.1
													region	OEA	DEG-rs	14.6676	33133.1
													region	OEA	DEG-rs	14.6676	33133.3
													region	IND	DEG-rs	14.6676	33133.3
													region	IND	DEG-rs	14.6676	33134.1
													region	OSA	DEG-rs	14.6676	33134.1
													region	OSA	DEG-rs	14.6676	33135.8
													region	OCN	DEG-rs	14.6676	33135.8
													region	OCN	DEG-rs	14.6676	33136.6
													region	PAS	DEG-rs	14.6676	33136.6
													region	PAS	DEG-rs	14.6676	33137.5
													region	LAC	DEG-rs	14.6676	33137.5
													region	LAC	DEG-rs	14.6676	33140
													region	USA	SHG-rs	15.238	33140
													region	USA	SHG-rs	15.238	33213.7
													region	CAN	SHG-rs	15.238	33213.7
													region	CAN	SHG-rs	15.238	33233.8
													region	WEU	SHG-rs	15.238	33233.8
													region	WEU	SHG-rs	15.238	33266.8
													region	EEU	SHG-rs	15.238	33266.8
													region	EEU	SHG-rs	15.238	33276.8
													region	FSU	SHG-rs	15.238	33276.8
													region	FSU	SHG-rs	15.238	33374.1
													region	NAF	SHG-rs	15.238	33374.1
													region	NAF	SHG-rs	15.238	33412.9
													region	EAF	SHG-rs	15.238	33412.9
													region	EAF	SHG-rs	15.238	33416.2
													region	WCA	SHG-rs	15.238	33416.2
													region	WCA	SHG-rs	15.238	33429.6
													region	SAF	SHG-rs	15.238	33429.6
													region	SAF	SHG-rs	15.238	33468.9
													region	MEE	SHG-rs	15.238	33468.9
													region	MEE	SHG-rs	15.238	33475.6
													region	CHN	SHG-rs	15.238	33475.6
													region	CHN	SHG-rs	15.238	33590
													region	OEA	SHG-rs	15.238	33590
													region	OEA	SHG-rs	15.238	33593.3
													region	IND	SHG-rs	15.238	33593.3
													region	IND	SHG-rs	15.238	33596.7
													region	OSA	SHG-rs	15.238	33596.7
													region	OSA	SHG-rs	15.238	33606.7
													region	OCN	SHG-rs	15.238	33606.7
													region	OCN	SHG-rs	15.238	33630.9
													region	PAS	SHG-rs	15.238	33630.9
													region	PAS	SHG-rs	15.238	33634.3
													region	LAC	SHG-rs	15.238	33634.3
													region	LAC	SHG-rs	15.238	33801.8
													region	USA	CMG-rs	16.5168	33801.8
													region	USA	CMG-rs	16.5168	33837
													region	CAN	CMG-rs	16.5168	33837
													region	CAN	CMG-rs	16.5168	33848.8
													region	WEU	CMG-rs	16.5168	33848.8
													region	WEU	CMG-rs	16.5168	33860.5
													region	EEU	CMG-rs	16.5168	33860.5
													region	EEU	CMG-rs	16.5168	33864.4
													region	FSU	CMG-rs	16.5168	33864.4
													region	FSU	CMG-rs	16.5168	33903.5
													region	NAF	CMG-rs	16.5168	33903.5
													region	NAF	CMG-rs	16.5168	33911.4
													region	EAF	CMG-rs	16.5168	33911.4
													region	EAF	CMG-rs	16.5168	33915.3
													region	WCA	CMG-rs	16.5168	33915.3
													region	WCA	CMG-rs	16.5168	33919.2
													region	SAF	CMG-rs	16.5168	33919.2
													region	SAF	CMG-rs	16.5168	33923.1
													region	MEE	CMG-rs	16.5168	33923.1
													region	MEE	CMG-rs	16.5168	33927
													region	CHN	CMG-rs	16.5168	33927
													region	CHN	CMG-rs	16.5168	33958.3
													region	OEA	CMG-rs	16.5168	33958.3
													region	OEA	CMG-rs	16.5168	33959.1
													region	IND	CMG-rs	16.5168	33959.1
													region	IND	CMG-rs	16.5168	33970.8
													region	OSA	CMG-rs	16.5168	33970.8
													region	OSA	CMG-rs	16.5168	33973.2
													region	JPN	CMG-rs	16.5168	33973.2
													region	JPN	CMG-rs	16.5168	33975.5
													region	OCN	CMG-rs	16.5168	33975.5
													region	OCN	CMG-rs	16.5168	33983.3
													region	PAS	CMG-rs	16.5168	33983.3
													region	PAS	CMG-rs	16.5168	33985.7
													region	LAC	CMG-rs	16.5168	33985.7
													region	LAC	CMG-rs	16.5168	33997.4
													region	USA	TIG-rs	16.5168	33997.4
													region	USA	TIG-rs	16.5168	34027.2
													region	CAN	TIG-rs	16.5168	34027.2
													region	CAN	TIG-rs	16.5168	34044.4
													region	WEU	TIG-rs	16.5168	34044.4
													region	WEU	TIG-rs	16.5168	34048.3
													region	EEU	TIG-rs	16.5168	34048.3
													region	EEU	TIG-rs	16.5168	34052.2
													region	FSU	TIG-rs	16.5168	34052.2
													region	FSU	TIG-rs	16.5168	34079.6
													region	NAF	TIG-rs	16.5168	34079.6
													region	NAF	TIG-rs	16.5168	34087.4
													region	EAF	TIG-rs	16.5168	34087.4
													region	EAF	TIG-rs	16.5168	34091.3
													region	WCA	TIG-rs	16.5168	34091.3
													region	WCA	TIG-rs	16.5168	34103.1
													region	SAF	TIG-rs	16.5168	34103.1
													region	SAF	TIG-rs	16.5168	34107
													region	MEE	TIG-rs	16.5168	34107
													region	MEE	TIG-rs	16.5168	34122.6
													region	CHN	TIG-rs	16.5168	34122.6
													region	CHN	TIG-rs	16.5168	34126.5
													region	OEA	TIG-rs	16.5168	34126.5
													region	OEA	TIG-rs	16.5168	34130.4
													region	IND	TIG-rs	16.5168	34130.4
													region	IND	TIG-rs	16.5168	34134.3
													region	OSA	TIG-rs	16.5168	34134.3
													region	OSA	TIG-rs	16.5168	34142.2
													region	OCN	TIG-rs	16.5168	34142.2
													region	OCN	TIG-rs	16.5168	34146.1
													region	PAS	TIG-rs	16.5168	34146.1
													region	PAS	TIG-rs	16.5168	34153.9
													region	LAC	TIG-rs	16.5168	34153.9
													region	LAC	TIG-rs	16.5168	34165.6
													region	USA	DEG-rs	17.4218	34165.6
													region	USA	DEG-rs	17.4218	34172.4
													region	CAN	DEG-rs	17.4218	34172.4
													region	CAN	DEG-rs	17.4218	34173.8
													region	WEU	DEG-rs	17.4218	34173.8
													region	WEU	DEG-rs	17.4218	34174.6
													region	EEU	DEG-rs	17.4218	34174.6
													region	EEU	DEG-rs	17.4218	34175.3
													region	FSU	DEG-rs	17.4218	34175.3
													region	FSU	DEG-rs	17.4218	34182.8
													region	NAF	DEG-rs	17.4218	34182.8
													region	NAF	DEG-rs	17.4218	34185
													region	EAF	DEG-rs	17.4218	34185
													region	EAF	DEG-rs	17.4218	34185.8
													region	WCA	DEG-rs	17.4218	34185.8
													region	WCA	DEG-rs	17.4218	34188
													region	SAF	DEG-rs	17.4218	34188
													region	SAF	DEG-rs	17.4218	34188.7
													region	MEE	DEG-rs	17.4218	34188.7
													region	MEE	DEG-rs	17.4218	34191
													region	CHN	DEG-rs	17.4218	34191
													region	CHN	DEG-rs	17.4218	34191.7
													region	OEA	DEG-rs	17.4218	34191.7
													region	OEA	DEG-rs	17.4218	34191.9
													region	IND	DEG-rs	17.4218	34191.9
													region	IND	DEG-rs	17.4218	34192.6
													region	OSA	DEG-rs	17.4218	34192.6
													region	OSA	DEG-rs	17.4218	34194.1
													region	OCN	DEG-rs	17.4218	34194.1
													region	OCN	DEG-rs	17.4218	34194.9
													region	PAS	DEG-rs	17.4218	34194.9
													region	PAS	DEG-rs	17.4218	34195.6
													region	LAC	DEG-rs	17.4218	34195.6
													region	LAC	DEG-rs	17.4218	34197.8
													region	USA	SHG-rs	18.0993	34197.8
													region	USA	SHG-rs	18.0993	34263.4
													region	CAN	SHG-rs	18.0993	34263.4
													region	CAN	SHG-rs	18.0993	34281.3
													region	WEU	SHG-rs	18.0993	34281.3
													region	WEU	SHG-rs	18.0993	34310.5
													region	EEU	SHG-rs	18.0993	34310.5
													region	EEU	SHG-rs	18.0993	34319.5
													region	FSU	SHG-rs	18.0993	34319.5
													region	FSU	SHG-rs	18.0993	34405.9
													region	NAF	SHG-rs	18.0993	34405.9
													region	NAF	SHG-rs	18.0993	34440.4
													region	EAF	SHG-rs	18.0993	34440.4
													region	EAF	SHG-rs	18.0993	34443.4
													region	WCA	SHG-rs	18.0993	34443.4
													region	WCA	SHG-rs	18.0993	34455.3
													region	SAF	SHG-rs	18.0993	34455.3
													region	SAF	SHG-rs	18.0993	34490.2
													region	MEE	SHG-rs	18.0993	34490.2
													region	MEE	SHG-rs	18.0993	34496.2
													region	CHN	SHG-rs	18.0993	34496.2
													region	CHN	SHG-rs	18.0993	34597.8
													region	OEA	SHG-rs	18.0993	34597.8
													region	OEA	SHG-rs	18.0993	34600.8
													region	IND	SHG-rs	18.0993	34600.8
													region	IND	SHG-rs	18.0993	34603.8
													region	OSA	SHG-rs	18.0993	34603.8
													region	OSA	SHG-rs	18.0993	34612.7
													region	OCN	SHG-rs	18.0993	34612.7
													region	OCN	SHG-rs	18.0993	34634.2
													region	PAS	SHG-rs	18.0993	34634.2
													region	PAS	SHG-rs	18.0993	34637.2
													region	LAC	SHG-rs	18.0993	34637.2
													region	LAC	SHG-rs	18.0993	34786.1
													region	USA	DEG-rs	20.4515	34786.1
													region	USA	DEG-rs	20.4515	34792.8
													region	CAN	DEG-rs	20.4515	34792.8
													region	CAN	DEG-rs	20.4515	34794.3
													region	WEU	DEG-rs	20.4515	34794.3
													region	WEU	DEG-rs	20.4515	34795.1
													region	EEU	DEG-rs	20.4515	34795.1
													region	EEU	DEG-rs	20.4515	34795.8
													region	FSU	DEG-rs	20.4515	34795.8
													region	FSU	DEG-rs	20.4515	34803.3
													region	NAF	DEG-rs	20.4515	34803.3
													region	NAF	DEG-rs	20.4515	34805.5
													region	EAF	DEG-rs	20.4515	34805.5
													region	EAF	DEG-rs	20.4515	34806.3
													region	WCA	DEG-rs	20.4515	34806.3
													region	WCA	DEG-rs	20.4515	34808.5
													region	SAF	DEG-rs	20.4515	34808.5
													region	SAF	DEG-rs	20.4515	34809.2
													region	MEE	DEG-rs	20.4515	34809.2
													region	MEE	DEG-rs	20.4515	34811.5
													region	CHN	DEG-rs	20.4515	34811.5
													region	CHN	DEG-rs	20.4515	34812.2
													region	OEA	DEG-rs	20.4515	34812.2
													region	OEA	DEG-rs	20.4515	34812.4
													region	IND	DEG-rs	20.4515	34812.4
													region	IND	DEG-rs	20.4515	34813.1
													region	OSA	DEG-rs	20.4515	34813.1
													region	OSA	DEG-rs	20.4515	34814.6
													region	OCN	DEG-rs	20.4515	34814.6
													region	OCN	DEG-rs	20.4515	34815.3
													region	PAS	DEG-rs	20.4515	34815.3
													region	PAS	DEG-rs	20.4515	34816.1
													region	LAC	DEG-rs	20.4515	34816.1
													region	LAC	DEG-rs	20.4515	34818.3
													region	USA	SHG-rs	21.2468	34818.3
													region	USA	SHG-rs	21.2468	34883.9
													region	CAN	SHG-rs	21.2468	34883.9
													region	CAN	SHG-rs	21.2468	34901.8
													region	WEU	SHG-rs	21.2468	34901.8
													region	WEU	SHG-rs	21.2468	34931
													region	EEU	SHG-rs	21.2468	34931
													region	EEU	SHG-rs	21.2468	34940
													region	FSU	SHG-rs	21.2468	34940
													region	FSU	SHG-rs	21.2468	35026.4
													region	NAF	SHG-rs	21.2468	35026.4
													region	NAF	SHG-rs	21.2468	35060.9
													region	EAF	SHG-rs	21.2468	35060.9
													region	EAF	SHG-rs	21.2468	35063.9
													region	WCA	SHG-rs	21.2468	35063.9
													region	WCA	SHG-rs	21.2468	35075.8
													region	SAF	SHG-rs	21.2468	35075.8
													region	SAF	SHG-rs	21.2468	35110.7
													region	MEE	SHG-rs	21.2468	35110.7
													region	MEE	SHG-rs	21.2468	35116.7
													region	CHN	SHG-rs	21.2468	35116.7
													region	CHN	SHG-rs	21.2468	35218.3
													region	OEA	SHG-rs	21.2468	35218.3
													region	OEA	SHG-rs	21.2468	35221.3
													region	IND	SHG-rs	21.2468	35221.3
													region	IND	SHG-rs	21.2468	35224.3
													region	OSA	SHG-rs	21.2468	35224.3
													region	OSA	SHG-rs	21.2468	35233.2
													region	OCN	SHG-rs	21.2468	35233.2
													region	OCN	SHG-rs	21.2468	35254.7
													region	PAS	SHG-rs	21.2468	35254.7
													region	PAS	SHG-rs	21.2468	35257.7
													region	LAC	SHG-rs	21.2468	35257.7
													region	LAC	SHG-rs	21.2468	35406.6
													region	USA	DEG-rs	23.7841	35406.6
													region	USA	DEG-rs	23.7841	35411.7
													region	CAN	DEG-rs	23.7841	35411.7
													region	CAN	DEG-rs	23.7841	35412.8
													region	WEU	DEG-rs	23.7841	35412.8
													region	WEU	DEG-rs	23.7841	35413.3
													region	EEU	DEG-rs	23.7841	35413.3
													region	EEU	DEG-rs	23.7841	35413.9
													region	FSU	DEG-rs	23.7841	35413.9
													region	FSU	DEG-rs	23.7841	35419.5
													region	NAF	DEG-rs	23.7841	35419.5
													region	NAF	DEG-rs	23.7841	35421.2
													region	EAF	DEG-rs	23.7841	35421.2
													region	EAF	DEG-rs	23.7841	35421.7
													region	WCA	DEG-rs	23.7841	35421.7
													region	WCA	DEG-rs	23.7841	35423.4
													region	SAF	DEG-rs	23.7841	35423.4
													region	SAF	DEG-rs	23.7841	35423.9
													region	MEE	DEG-rs	23.7841	35423.9
													region	MEE	DEG-rs	23.7841	35425.6
													region	CHN	DEG-rs	23.7841	35425.6
													region	CHN	DEG-rs	23.7841	35426.2
													region	OEA	DEG-rs	23.7841	35426.2
													region	OEA	DEG-rs	23.7841	35426.3
													region	IND	DEG-rs	23.7841	35426.3
													region	IND	DEG-rs	23.7841	35426.8
													region	OSA	DEG-rs	23.7841	35426.8
													region	OSA	DEG-rs	23.7841	35428
													region	OCN	DEG-rs	23.7841	35428
													region	OCN	DEG-rs	23.7841	35428.5
													region	PAS	DEG-rs	23.7841	35428.5
													region	PAS	DEG-rs	23.7841	35429.1
													region	LAC	DEG-rs	23.7841	35429.1
													region	LAC	DEG-rs	23.7841	35430.8
													region	USA	SHG-rs	24.7091	35430.8
													region	USA	SHG-rs	24.7091	35479.9
													region	CAN	SHG-rs	24.7091	35479.9
													region	CAN	SHG-rs	24.7091	35493.3
													region	WEU	SHG-rs	24.7091	35493.3
													region	WEU	SHG-rs	24.7091	35515.3
													region	EEU	SHG-rs	24.7091	35515.3
													region	EEU	SHG-rs	24.7091	35522
													region	FSU	SHG-rs	24.7091	35522
													region	FSU	SHG-rs	24.7091	35586.8
													region	NAF	SHG-rs	24.7091	35586.8
													region	NAF	SHG-rs	24.7091	35612.7
													region	EAF	SHG-rs	24.7091	35612.7
													region	EAF	SHG-rs	24.7091	35614.9
													region	WCA	SHG-rs	24.7091	35614.9
													region	WCA	SHG-rs	24.7091	35623.9
													region	SAF	SHG-rs	24.7091	35623.9
													region	SAF	SHG-rs	24.7091	35650.1
													region	MEE	SHG-rs	24.7091	35650.1
													region	MEE	SHG-rs	24.7091	35654.5
													region	CHN	SHG-rs	24.7091	35654.5
													region	CHN	SHG-rs	24.7091	35730.7
													region	OEA	SHG-rs	24.7091	35730.7
													region	OEA	SHG-rs	24.7091	35733
													region	IND	SHG-rs	24.7091	35733
													region	IND	SHG-rs	24.7091	35735.2
													region	OSA	SHG-rs	24.7091	35735.2
													region	OSA	SHG-rs	24.7091	35741.9
													region	OCN	SHG-rs	24.7091	35741.9
													region	OCN	SHG-rs	24.7091	35758
													region	PAS	SHG-rs	24.7091	35758
													region	PAS	SHG-rs	24.7091	35760.3
													region	LAC	SHG-rs	24.7091	35760.3
													region	LAC	SHG-rs	24.7091	35872

## Sheet: 2. Oil data summary (vs SSP5)
	Reservoir type	Reserves/ Resources	Quantity		Cost
			Value (EJ)	Assumption	Value ($US/GJ)	Assumption
OIL	Conventional oil	Reserves	6741	Sources: BGR, USGS	1.54 – 8.15	x 1.77, x 2.52
		Resources	4555 (-42%)	Sources: BGR, USGS	1.54 – 12.05	x 1.77, x 2.52
	Sub-total		11296 (-22%)		1.54 – 12.05
	Oil sands	Reserves	1910	RR: 100%	6.94 – 15.63	( +5) x 1.98
		Resources	9010	RR: 33%	17.36 – 53.62	( +5) x 1.98
	Heavy and Extra-heavy oil	Reserves	343	RR: 100%	6.94 – 15.63	( +5) x 1.98
		Resources	2787 (-17%)	RR: 25%	17.36 – 53.62	( +5) x 1.98
	Shale oil	Reserves	1492	RR: 100%	6.94 – 15.63	( +5) x 1.98
		Resources	5706 (-34%)	RR: 33%	17.36 – 53.62	( +5) x 1.98
	Sub-total		21248 (-14%)		6.94 – 53.62
	Total		32544 (-17%)		1.54 – 53.62
	LEGEND
	RR	Recovery rate

## Sheet: 3. Gas data summary (vs SSP5)
	Reservoir type	Reserves/ Resources	Quantity		Cost
			Value (EJ)	Assumption	Value ($US/GJ)	Assumption
GAS	Conventional gas	Reserves	7101	Sources: BGR, USGS	0.62 – 5.60	x 1.77, x 2.52
		Resources	9777 (-8%)	Sources: BGR, USGS	0.62 – 8.15	x 1.77, x 2.52
	Sub-total		16878 (-5%)		0.62 – 8.15
	CBM	Reserves	3250 (-20%)	RR: 80%	3.45 – 6.38	x 1.15
		Resources	1304 (-30%)	RR: 14%	8.45 – 16.52	x 1.25
	Deep gas	Reserves	2033 (-50%)	RR: 50%	4.50 – 8.32	x 1.5
		Resources	161 (-91%)	RR: 2%	12.16 – 23.78	x 1.8
	Tight gas	Reserves	4592 (-20%)	RR: 80%	3.45 – 6.38	x 1.15
		Resources	1121 (-30%)	RR: 14%	8.45 – 16.52	x 1.25
	Shale gas	Reserves	3591 (-43%)	RR: 57%	3.45 – 6.38	x 1.47
		Resources	2840 (-60%)	0.4 x MAX(GEA, ARI)	8.45 – 16.52	x 1.87
	Hydrates	Reserves	0	-	-	-
		Resources	0 (-100%)	Hard limit	-	-
	Sub-total		18892 (-49%)		3.45 – 23.78
	Total		35770 (-35%)		0.62 – 23.78
	LEGEND
	RR	Recovery rate

## Sheet: 4. Oil - Resources
	Oil resource data														Assumptions
#	Region code	Conventional		Unconventional											Conventional						Unconventional oil
		oil		oil		Oil sands		Heavy and Extra-heavy oil		Shale oil					oil						Oil sands			Heavy and Extra-heavy oil			Shale oil
		Reserves (EJ)	Resources (EJ)	Reserves (EJ)	Resources (EJ)	Reserves (EJ)	Resources (EJ)	Reserves (EJ)	Resources (EJ)	Reserves (EJ)	Resources (EJ)				Factor	Resources (EJ)	C	Factor	Resources (EJ)	C	Recovery rate	Resources (EJ)	C	Recovery rate	Resources (EJ)	C	Recovery rate	Resources (EJ)	C
1	USA	162	420	1435.65	5384.26	0	81.5861	66.5701	1136.11	1369.08	4166.57				1	162	1	1	420	1	0.33	247.231	-	0.25	4544.44	3	0.33	12626	4
2	CAN	28	101	1149.32	4062.3	1149.28	3390.28	0.041868	641.627	0	30.3962				1	28	1	1	101	1	0.33	10273.6	-	0.25	2566.51	3	0.33	92.1096	4
3	WEU	88	186	8.20613	194.499	1.38164	1.46454	1.08857	6.07086	5.73592	186.964				1	88	1	1	186	1	0.33	4.43801	-	0.25	24.2834	3	0.33	566.558	4
4	EEU	6	13	0.334944	1.52106	0	0.483575	0.251208	0.125604	0.083736	0.911885				1	6	1	1	13	1	0.33	1.46538	-	0.25	0.502416	3	0.33	2.76329	4
5	FSU	735	1008	759.234	3144.5	748.139	2497.24	0.879228	2.70049	10.2158	644.565				1	735	1	1	1008	1	0.33	7567.39	-	0.25	10.8019	3	0.33	1953.23	4
6	NAF	388	184	6.61514	128.091	0	0	0.334944	3.97746	6.2802	124.113				1	388	1	1	184	1	0.33	0	-	0.25	15.9098	3	0.33	376.1	4
7	EAF	4	13	1.46538	1.60271	1.46538	1.53362	0	0	0	0.0690822				1	4	1	1	13	1	0.33	4.64735	-	0.25	0	3	0.33	0.20934	4
8	WCA	254	302	4.0612	201.941	4.0612	4.22783	0	0	0	197.713				1	254	1	1	302	1	0.33	12.8116	-	0.25	0	3	0.33	599.131	4
9	SAF	77	150	3.09823	3.48174	3.09823	3.21923	0	0	0	0.262512				1	77	1	1	150	1	0.33	9.75524	-	0.25	0	3	0.33	0.795492	4
10	MEE	4286	889	55.3076	997.199	0	0	0.041868	917.119	55.2658	80.0801				1	4286	1	1	889	1	0.33	0	-	0.25	3668.47	3	0.33	242.667	4
11	CHN	84	97	12.9791	91.3484	0	1.22966	4.98229	58.4791	7.99679	31.6396				1	84	1	1	97	1	0.33	3.72625	-	0.25	233.917	3	0.33	95.8777	4
12	OEA	26	32	0	15.4434	0	0	0	14.8631	0	0.58029				1	26	1	1	32	1	0.33	0	-	0.25	59.4526	3	0.33	1.75846	4
13	IND	33	17	0	4.50081	0	0	0	4.50081	0	0				1	33	1	1	17	1	0.33	0	-	0.25	18.0032	3	0.33	0	4
14	OSA	2	13	0	0	0	0	0	0	0	0				1	2	1	1	13	1	0.33	0	-	0.25	0	3	0.33	0	4
15	JPN	0	0	0	0	0	0	0	0	0	0				1	0	1	1	0	1	0.33	0	-	0.25	0	3	0.33	0	4
16	OCN	24	44	21.6876	62.6437	0	0	0	0	21.6876	62.6437				1	24	1	1	44	1	0.33	0	-	0.25	0	3	0.33	189.83	4
17	PAS	65	88	13.1047	19.6746	2.93076	3.06725	0	0	10.1739	16.6074				1	65	1	1	88	1	0.33	9.2947	-	0.25	0	3	0.33	50.3253	4
18	LAC	479	614	274.528	3189.8	0	3025.8	268.918	1.0467	5.61031	162.951				1	479	1	1	614	1	0.33	9169.09	-	0.25	4.1868	3	0.33	493.791	4
19	SOO	0	0	0	0	0	0	0	0	0	0				0.5	0	-	0.5	0	-	0.33	0	-	0.25	0	3	0.33	0	4
20	ARC	0	383.881	0	0	0	0	0	0	0	0				0.5	0	-	0.5	767.761	2	0.33	0	-	0.25	0	3	0.33	0	4
	SUB-TOTAL	6741	4554.88	3745.6	17502.8	1910.35	9010.13	343.108	2786.62	1492.13	5706.07				C stands for comments (see below)
	TOTAL	11295.9		21248.4
	Grand TOTAL	32544.3													Comments
	Legend														#	Reference	Comment
	Reserves														1	1, 2	Using the most recent BGR data instead of USGS data (as reported in GEA Table 7.6 chap.7 p. 440)
	Resources														2	EJ	Scenario assumption: only 50% of original GEA Artic resources
															3	EJ	Scenario assumption: Recovery rate for extra-heavy oil resources set to 25% (about -17% c/w SSP5)
															4	1	Scenario assumption: Recovery rate for shale oil resources left to original GEA value (about -34% c/w SSP5)
															References are listed in tab 'References' - Grey cells indicate default GEA assumptions/data - EJ: Expert judgement

## Sheet: 5. Oil - Production costs
	Oil production costs data									Assumptions
#	Reservoir type	Category	Regional distinction	Production costs ($/GJ)		# cost bins				#	Reservoir type	Category	Regional distinction	GEA extraction costs ($/GJ)		# cost bins	Cost multiplier	Cost mark-up ($/GJ)	C
				Min	Max									Min	Max
1	Conventional	Reserves	MEE, FSU	1.5399	9.2217	4				1	Conventional	Reserves	MEE, FSU	0.87	5.21	4	1.77	0	1
2		Reserves	rest	2.1924	13.1292	4				2		Reserves	rest	0.87	5.21	4	2.52	0	2
3		Resources	MEE, FSU	1.5399	9.2217	4				3		Resources	MEE, FSU	0.87	5.21	4	1.77	0	1
4		Resources	rest	2.1924	13.1292	4				4		Resources	rest	0.87	5.21	4	2.52	0	2
-	Unconventional	Reserves	all	6.94059	15.6328	6				-	Unconventional	Reserves	all	2.63	7.02	6	-	-
-		Resources	all	17.3554	53.629	8				-		Resources	all	7.89	26.21	8	-	-
5	Oil sands	Reserves	all	6.94059	15.6328	6				5	Oil sands	Reserves	all	2.63	7.02	6	1.98	0.87535	3
6		Resources	all	17.3554	53.629	8				6		Resources	all	7.89	26.21	8	1.98	0.87535	3
7	Heavy and Extra-heavy oil	Reserves	all	6.94059	15.6328	6				7	Heavy and Extra-heavy oil	Reserves	all	2.63	7.02	6	1.98	0.87535	3
8		Resources	all	17.3554	53.629	8				8		Resources	all	7.89	26.21	8	1.98	0.87535	3
9	Shale oil	Reserves	all	6.94059	15.6328	6				9	Shale oil	Reserves	all	2.63	7.02	6	1.98	0.87535	3
10		Resources	all	17.3554	53.629	8				10		Resources	all	7.89	26.21	8	1.98	0.87535	3
										C stands for comments (see below)
										Comments
										#	Reference	Comment
										1	11, EJ	Scenario assumption: Increasing costs of conventional reserves by a factor of 1.77 in the MEE and FSU regions. This cost adjustment reflects the significant cost increase over the past decade as shown by the CERA upstream indices
										2	11, EJ	Scenario assumption: Increasing costs of conventional reserves by a factor of 2.52 in the remaining regions. This cost adjustment reflects the significant cost increase over the past decade as shown by the CERA upstream indices
										3	EJ	Scenario assumption: 98% cost increase +5$/GJ cost mark-up to account for transformation into syncrude
										References are listed in tab 'References' - Grey cells indicate default GEA assumptions/data - EJ: Expert judgement

## Sheet: 6. Gas - Resources
	Gas resource data																		Assumptions
#	Region code	Conventional		Unconventional															Conventional						Unconventional gas
		Gas		Gas		Deep Gas		Coal-bed methane		Tight gas		Shale gas		Gas hydrates					Gas						Deep Gas						Coal-bed methane						Tight gas						Shale gas						Gas hydrates
		Reserves (EJ)	Resources (EJ)	Reserves (EJ)	Resources (EJ)	Reserves (EJ)	Resources (EJ)	Reserves (EJ)	Resources (EJ)	Reserves (EJ)	Resources (EJ)	Reserves (EJ)	Resources (EJ)	Reserves (EJ)	Resources (EJ)				Factor	Reserves (EJ)	C	Factor	Resources (EJ)	C	Recovery rate	Reserves (EJ)	C	Recovery rate	Resources (EJ)	C	Recovery rate	Reserves (EJ)	C	Recovery rate	Resources (EJ)	C	Recovery rate	Reserves (EJ)	C	Recovery rate	Resources (EJ)	C	Recovery rate	Reserves (EJ)	C	Recovery rate	Resources (EJ)	C	Recovery rate
1	USA	262	740	3073.61	794.4	372.5	33.54	744.8	234.78	894.4	198.24	1061.91	327.84	0	0				1	262	1	1	740	1	0.5	745	3	0.02	1677	4	0.8	931	5	0.14	1677	6	0.8	1118	5	0.14	1416	6	0.57	1863	7	0.08	4098	8	0
2	CAN	65	259	855.02	289.856	93	7.46	208.8	78.26	447.2	114.8	106.02	89.336	0	0				1	65	1	1	259	1	0.5	186	3	0.02	373	4	0.8	261	5	0.14	559	6	0.8	559	5	0.14	820	6	0.57	186	7	0.239507	373	8	0
3	WEU	162	313	511.68	180.69	56	3.72	208.8	78.26	119.2	26.04	127.68	72.67	0	0				1	162	1	1	313	1	0.5	112	3	0.02	186	4	0.8	261	5	0.14	559	6	0.8	149	5	0.14	186	6	0.57	224	7	0.13	559	8	0
4	EEU	31	23	362.88	72.57	56	3.72	60	26.04	119.2	26.04	127.68	16.77	0	0				1	31	1	1	23	1	0.5	112	3	0.02	186	4	0.8	75	5	0.14	186	6	0.8	149	5	0.14	186	6	0.57	224	7	0.03	559	8	0
5	FSU	2352	4332	3263.35	912.8	559	37.26	596	260.82	834.4	182.56	1273.95	432.16	0	0				1	2352	1	1	4332	1	0.5	1118	3	0.02	1863	4	0.8	745	5	0.14	1863	6	0.8	1043	5	0.14	1304	6	0.57	2235	7	0.08	5402	8	0
6	NAF	310	324	629.03	288.12	186.5	11.18	119.2	52.22	238.4	52.22	84.93	172.5	0	0				1	310	1	1	324	1	0.5	373	3	0.02	559	4	0.8	149	5	0.14	373	6	0.8	298	5	0.14	373	6	0.57	149	7	0.462466	373	8	0
7	EAF	1	22	277.95	70.68	56	3.72	60	26.04	119.2	26.04	42.75	14.88	0	0				1	1	1	1	22	1	0.5	112	3	0.02	186	4	0.8	75	5	0.14	186	6	0.8	149	5	0.14	186	6	0.57	75	7	0.08	186	8	0
8	WCA	213	183	717.96	175.08	130.5	11.18	60	26.04	357.6	78.26	169.86	59.6	0	0				1	213	1	1	183	1	0.5	261	3	0.02	559	4	0.8	75	5	0.14	186	6	0.8	447	5	0.14	559	6	0.57	298	7	0.08	745	8	0
9	SAF	21	70	229.85	230.47	37.5	3.72	60	26.04	89.6	26.04	42.75	174.67	0	0				1	21	1	1	70	1	0.5	75	3	0.02	186	4	0.8	75	5	0.14	186	6	0.8	112	5	0.14	186	6	0.57	75	7	0.939086	186	8	0
10	MEE	2788	1309	722.63	171.36	130.5	11.18	60	26.04	447.2	104.3	84.93	29.84	0	0				1	2788	1	1	1309	1	0.5	261	3	0.02	559	4	0.8	75	5	0.14	186	6	0.8	559	5	0.14	745	6	0.57	149	7	0.08	373	8	0
11	CHN	91	370	617.05	746.41	37.5	3.72	447.2	208.6	89.6	26.04	42.75	508.05	0	0				1	91	1	1	370	1	0.5	75	3	0.02	186	4	0.8	559	5	0.14	1490	6	0.8	112	5	0.14	186	6	0.57	75	7	2.73145	186	8	0
12	OEA	26	60	132.35	46.84	0	0.74	0	5.18	89.6	26.04	42.75	14.88	0	0				1	26	1	1	60	1	0.5	0	3	0.02	37	4	0.8	0	5	0.14	37	6	0.8	112	5	0.14	186	6	0.57	75	7	0.08	186	8	0
13	IND	41	33	378.65	122.9	37.5	3.72	208.8	78.26	89.6	26.04	42.75	14.88	0	0				1	41	1	1	33	1	0.5	75	3	0.02	186	4	0.8	261	5	0.14	559	6	0.8	112	5	0.14	186	6	0.57	75	7	0.08	186	8	0
14	OSA	49	81	429.48	120.08	93	7.46	29.6	15.68	179.2	52.22	127.68	44.72	0	0				1	49	1	1	81	1	0.5	186	3	0.02	373	4	0.8	37	5	0.14	112	6	0.8	224	5	0.14	373	6	0.57	224	7	0.08	559	8	0
15	JPN	1	0	29.6	15.68	0	0	29.6	15.68	0	0	0	0	0	0				1	1	1	1	0	1	0.5	0	3	0.02	0	4	0.8	37	5	0.14	112	6	0.8	0	5	0.14	0	6	0.57	0	7	0.08	0	8	0
16	OCN	115	78	390.43	189.492	37.5	3.72	148.8	52.22	119.2	26.04	84.93	107.512	0	0				1	115	1	1	78	1	0.5	75	3	0.02	186	4	0.8	186	5	0.14	373	6	0.8	149	5	0.14	186	6	0.57	149	7	0.288236	373	8	0
17	PAS	274	304	289.05	86.5	37.5	3.72	29.6	15.68	179.2	52.22	42.75	14.88	0	0				1	274	1	1	304	1	0.5	75	3	0.02	186	4	0.8	37	5	0.14	112	6	0.8	224	5	0.14	373	6	0.57	75	7	0.08	186	8	0
18	LAC	299	402	555.33	912.432	112	11.18	179.2	78.26	179.2	78.26	84.93	744.732	0	0				1	299	1	1	402	1	0.5	224	3	0.02	559	4	0.8	224	5	0.14	559	6	0.8	224	5	0.14	559	6	0.57	149	7	1.9966	373	8	0
19	SOO	0	0	0	0	0	0	0	0	0	0	0	0	0	0				0.5	0	-	0.5	0	-	0.5	0	3	0.02	0	4	0.8	0	5	0.14	0	6	0.8	0	5	0.14	0	6	0.57	0	7	0.08	0	8	0
20	ARC	0	874.148	0	0	0	0	0	0	0	0	0	0	0	0				0.5	0	-	0.5	1748.3	2	0.5	0	3	0.02	0	4	0.8	0	5	0.14	0	6	0.8	0	5	0.14	0	6	0.57	0	7	0.08	0	8	0
	SUB-TOTAL	7101	9777.15	13465.9	5426.36	2032.5	160.94	3250.4	1304.1	4592	1121.4	3591	2839.92	0	0				C stands for comments (see below)
	TOTAL	16878.1		18892.3
	Grand TOTAL	35770.4																	Comments
	Legend																		#	Reference	Comment
	Reserves																		1	1, 2	Using the most recent BGR data instead of USGS data (as reported in GEA Table 7.11 chap.7 p. 453)
	Resources																		2	EJ	Scenario assumption: only 50% of original GEA Artic resources
																			3	EJ	Scenario assumption: only 50% available for Deep gas reserves
																			4	EJ	Scenario assumption: only 2% available for Deep gas resources
																			5	EJ	Scenario assumption: only 80% available for Coal-bed methane and Tight gas reserves
																			6	EJ	Scenario assumption: only 14% available for Coal-bed methane and Tight gas resources
																			7	EJ	Scenario assumption: only 57% available for Shale gas reserves
																			8	1, 5, EJ	Scenario assumption: Maximum between GEA and ARI (Table 1-3 p. 1-5) and Expert judgement: only 40% available for Shale gas resources
																			9	EJ	Scenario assumption: Gas hydrates not available in this scenario
																			References are listed in tab 'References' - Grey cells indicate default GEA assumptions/data - EJ: Expert judgement
[truncated: 2 more columns]

## Sheet: 7. Gas - Production costs
	Gas production costs data									Assumptions
#	Reservoir type	Category	Regional distinction	Production costs ($/GJ)		# cost bins				#	Reservoir type	Category	Regional distinction	GEA extraction costs ($/GJ)		# cost bins	Cost multiplier	Cost mark-up ($/GJ)	C
				Min	Max									Min	Max
1	Conventional	Reserves	MEE, FSU	0.6195	6.1596	4				1	Conventional	Reserves	MEE, FSU	0.35	3.48	4	1.77	0	1
2		Reserves	rest	0.882	8.7696	4				2		Reserves	rest	0.35	3.48	4	2.52	0	2
3		Resources	MEE, FSU	0.6195	6.1596	4				3		Resources	MEE, FSU	0.35	3.48	4	1.77	0	1
4		Resources	rest	0.882	8.7696	4				4		Resources	rest	0.35	3.48	4	2.52	0	2
-	Unconventional	Reserves	all	3.45	8.325	4				-	Unconventional	Reserves	all	3	5.55	4	-	-	-
-		Resources	all	8.45	23.778	5				-		Resources	all	6.76	13.21	5	-	-	-
5	Deep Gas	Reserves	all	4.5	8.325	4				5	Deep Gas	Reserves	all	3	5.55	4	1.5	0	3
6		Resources	all	12.168	23.778	5				6		Resources	all	6.76	13.21	5	1.8	0	4
7	Coal-bed methane	Reserves	all	3.45	6.3825	4				7	Coal-bed methane	Reserves	all	3	5.55	4	1.15	0	5
8		Resources	all	8.45	16.5125	5				8		Resources	all	6.76	13.21	5	1.25	0	6
9	Tight gas	Reserves	all	3.45	6.3825	4				9	Tight gas	Reserves	all	3	5.55	4	1.15	0	5
10		Resources	all	8.45	16.5125	5				10		Resources	all	6.76	13.21	5	1.25	0	6
11	Shale gas	Reserves	all	4.41	8.1585	4				11	Shale gas	Reserves	all	3	5.55	4	1.47	0	7
12		Resources	all	12.6412	24.7027	5				12		Resources	all	6.76	13.21	5	1.87	0	8
13	Gas hydrates	Reserves	all	3	5.55	4				13	Gas hydrates	Reserves	all	3	5.55	4	1	0	-
14		Resources	all	6.76	13.21	5				14		Resources	all	6.76	13.21	5	1	0	-
										C stands for comments (see below)
										Comments
										#	Reference	Comment
										1	11, EJ	Scenario assumption: Increasing costs of conventional reserves by a factor of 1.77 in the MEE and FSU regions. This cost adjustment reflects the significant cost increase over the past decade as shown by the CERA upstream indices
										2	11, EJ	Scenario assumption: Increasing costs of conventional reserves by a factor of 2.52 in the remaining regions. This cost adjustment reflects the significant cost increase over the past decade as shown by the CERA upstream indices
										3	EJ	Scenario assumption: Increasing costs of Deep gas reserves by 50%
										4	EJ	Scenario assumption: Increasing costs of Deep gas reserves by 80%
										5	EJ	Scenario assumption: Increasing costs of Coal-bed methane and Tight gas reserves by 15%
										6	EJ	Scenario assumption: Increasing costs of Coal-bed methane and Tight gas reserves by 25%
										7	12, EJ	Scenario assumption: Increasing costs of Shale gas reserves by 47%
										8	12, EJ	Scenario assumption: Increasing costs of Shale gas reserves by 87%
										References are listed in tab 'References' - Grey cells indicate default GEA assumptions/data - EJ: Expert judgement

## Sheet: 8. References
	References
#	Author(s)	Organisation	Publisher	Title	Year	URL
1	Rogner H.-H. et al.	IIASA	IIASA	Global Energy Assessment - Chapter 7	2012	http://www.iiasa.ac.at/web/home/research/researchPrograms/Energy/Chapters_Home.en.html
2	BGR	BGR	BGR	Energierohstoffe 2009	2009	http://www.bgr.bund.de/DE/Themen/Energie/Produkte/energierohstoffe_2009.html
3	Bird K.J. et al.	USGS	USGS	Circum-Arctic Resource Appraisal: Estimates of Undiscovered Oil and Gas North of the Arctic Circle	2008	http://pubs.usgs.gov/fs/2008/3049/
4	Klett T.R. et al.	USGS	USGS	Assessment of Potential Additions to Conventional Oil and Gas Resources of the World (Outside the United States) from Reserve Growth	2012	http://pubs.usgs.gov/fs/2012/3052/
5	Kuuskraa V. et al.	ARI	ARI	World shale gas resources: An initial assessment of 14 regions outside the US	2011	http://www.eia.gov/analysis/studies/worldshalegas/
6	Dyni J.R.	USGS	USGS	Geology and Resources of Some World Oil-Shale Deposits	2005	http://pubs.usgs.gov/sir/2005/5294/
7	Brandt A.R.	U. of Berkley	Environ. Science & Tech.	Converting oil shale to liquid fuels: energy inputs and greenhouse fas emissions of the shell in situ conversion process	2008	http://pubs.acs.org/doi/abs/10.1021/es800531f
8	IEA	IEA	IEA	World Energy Outlook	2008	http://www.worldenergyoutlook.org/publications/2008-1994/
9	RAND	RAND	RAND		2007	www.rand.org/pubs/monographs/2005/RAND_MG414.pdf
10	Tipee B.		Oil & Gas journal	Steady growth seen for Canadian bitumen output despite increasing needs for pipeline capacity, gas	2012	http://www.ogj.com/articles/print/vol-110/issue-5/drilling-production/steady-growth-seen-for-canadian.html
11	CERA	CERA	CERA	CERA Upstream Capital and Operating costs indices	2012	http://www.ihs.com/info/cera/ihsindexes/index.aspx
12	IEA	IEA	IEA	Golden Rules for a Golden Age of Gas	2012	http://www.worldenergyoutlook.org/goldenrules/

## Sheet: 9. Definitions
	Definitions
	Reserves
	Resources
	Long-term supply cost curve
	Cumulative Extraction Cost Curve
	Cumulative Availability Curve
	Production cost
	Recovery rate
	Regions	Same as in GEA

[truncated: 1 more sheets: 10. Revision information]
