# Supplementary material for: Data on fossil fuel availability for Shared Socioeconomic Pathways
Source: Data Brief. 2016 Nov 18;10:44–6. doi: 10.1016/j.dib.2016.11.043 (PMC5137328; doi:10.1016/j.dib.2016.11.043)
Supplement: Supplementary file 9 — Supplementary material [file mmc9.xlsx]

## Sheet: 0. Information
	Scenario name	SSP3
	Date of initial assessment	2013-01-18
	Revision number	2
	Last revision date	2014-08-11
	Authors	Jerome Hilaire and Nico Bauer
	Affiliation	Potsdam Institute for Climate Impact Research
	Contacts	hilaire@pik-potsdam.de or bauer@pik-potsdam.de
	Where to find the relevant information?
	This Excel workbook contains a collection of spreadsheet that describe oil and gas data. The colour code of the list below follows that of the spreadsheet tabs. Supply cost curves are displayed in spreadsheet 1. Data are further given on 3 levels with increasing degree of information. Oil and gas data summaries provide the basic information (spreadsheet 2 and 3). Oil and gas resources and costs d…
	0. Information (this spreadsheet)
	1. Oil and gas supply-cost curves
	2. Oil data summary (vs original GEA)
	3. Gas data summary (vs original GEA)
	4. Oil resources (quantities)
	5. Oil production costs
	6. Gas resources (quantities)
	7. Gas production costs
	8. References
	9. Definitions
	10. Revision information
	How to read these data?
	Red fonts indicate a change in the data.
	Green backgrounds are used for reserves
	Orange backgrounds are used for resources
	Blue backgrounds are used for conventional resources
	Violet backgrounds are used for unconventional resources

## Sheet: 1. Supply-cost curves
	Oil and gas supply cost curves
	Oil data												Gas data
	Updated GEA (SSP3)						GEA						Updated GEA (SSP3)						GEA
	v_curSpaTyp	v_curSpaItm	v_curffTyp	v_curCost	v_curQty		$/GJ	EJ					v_curSpaTyp	v_curSpaItm	v_curffTyp	v_curCost	v_curQty		$/GJ	EJ
	region	MEE	COO-rv	1.74	0		0.87	0					region	FSU	COG-rv	0.7	0		0.5	0
	region	MEE	COO-rv	1.74	1071.5		0.87	828.409					region	FSU	COG-rv	0.7	338.318		0.5	2257.05
	region	MEE	COO-rs	1.74	1071.5		1.0225	828.409					region	MEE	COG-rv	0.7	338.318		1.07	2257.05
	region	MEE	COO-rs	1.74	1076.42		1.0225	1656.82					region	MEE	COG-rv	0.7	930.768		1.07	5405.92
	region	MEE	COO-rv	2.045	1076.42		1.175	1656.82					region	MEE	COG-rs	0.7	930.768		1.5	5405.92
	region	MEE	COO-rv	2.045	2147.92		1.175	3313.64					region	MEE	COG-rs	0.7	978.991		1.5	8488.47
	region	MEE	COO-rs	2.045	2147.92		1.48	3313.64					region	USA	COG-rv	0.882	978.991		2	8488.47
	region	MEE	COO-rs	2.045	2152.85		1.48	6629.93					region	USA	COG-rv	0.882	1032.23		2	10080.6
	region	USA	COO-rv	2.1924	2152.85		2.1925	6629.93					region	CAN	COG-rv	0.882	1032.23		2.75	10080.6
	region	USA	COO-rv	2.1924	2160.14		2.1925	8341.96					region	CAN	COG-rv	0.882	1043.04		2.75	10451.4
	region	EAF	COO-rv	2.1924	2160.14		2.965	8341.96					region	WEU	COG-rv	0.882	1043.04		3	10451.4
	region	EAF	COO-rv	2.1924	2160.22		2.965	9473.07					region	WEU	COG-rv	0.882	1083.54		3	14482.6
	region	WCA	COO-rv	2.1924	2160.22		2.965	9473.07					region	EEU	COG-rv	0.882	1083.54		3.7	14482.6
	region	WCA	COO-rv	2.1924	2206.46		2.965	10329.1					region	EEU	COG-rv	0.882	1088.55		3.7	19521.6
	region	SAF	COO-rv	2.1924	2206.46		3.50877	10329.1					region	EAF	COG-rv	0.882	1088.55		4.54	19521.6
	region	SAF	COO-rv	2.1924	2211.31		3.50877	11490.4					region	EAF	COG-rv	0.882	1088.62		4.54	25568.5
	region	IND	COO-rv	2.1924	2211.31		4.38596	11490.4					region	WCA	COG-rv	0.882	1088.62		5.548	25568.5
	region	IND	COO-rv	2.1924	2211.91		4.38596	11880.9					region	WCA	COG-rv	0.882	1141.87		5.548	30607.5
	region	OSA	COO-rv	2.1924	2211.91		4.38596	11880.9					region	SAF	COG-rv	0.882	1141.87		6.7576	30607.5
	region	OSA	COO-rv	2.1924	2211.95		4.38596	12271.5					region	SAF	COG-rv	0.882	1147.12		6.7576	32419.8
	region	OCN	COO-rv	2.1924	2211.95		5.26316	12271.5					region	CHN	COG-rv	0.882	1147.12		8.14864	32419.8
	region	OCN	COO-rv	2.1924	2212.59		5.26316	13414.8					region	CHN	COG-rv	0.882	1169.87		8.14864	34232.2
	region	PAS	COO-rv	2.1924	2212.59		7.01754	13414.8					region	OEA	COG-rv	0.882	1169.87		9.67878	34232.2
	region	PAS	COO-rv	2.1924	2217.3		7.01754	14186.5					region	OEA	COG-rv	0.882	1176.37		9.67878	35843.2
	region	LAC	COO-rv	2.1924	2217.3		7.01754	14186.5					region	IND	COG-rv	0.882	1176.37		11.3619	35843.2
	region	LAC	COO-rv	2.1924	2253.26		7.01754	15373.7					region	IND	COG-rv	0.882	1179.92		11.3619	37454.2
	region	MEE	COO-rv	2.35	2253.26		8.77193	15373.7					region	OSA	COG-rv	0.882	1179.92		13.2134	37454.2
	region	MEE	COO-rv	2.35	3324.76		8.77193	17438.7					region	OSA	COG-rv	0.882	1189.71		13.2134	43662.4
	region	MEE	COO-rs	2.35	3324.76		8.77193	17438.7					region	JPN	COG-rv	0.882	1189.71
	region	MEE	COO-rs	2.35	3329.68		8.77193	18856.3					region	JPN	COG-rv	0.882	1189.91
	region	USA	COO-rv	2.5767	3329.68		10.0877	18856.3					region	OCN	COG-rv	0.882	1189.91
	region	USA	COO-rv	2.5767	3336.97		10.0877	20281.4					region	OCN	COG-rv	0.882	1218.66
	region	EAF	COO-rv	2.5767	3336.97		12.0614	20281.4					region	PAS	COG-rv	0.882	1218.66
	region	EAF	COO-rv	2.5767	3337.05		12.0614	22874.5					region	PAS	COG-rv	0.882	1264.66
	region	WCA	COO-rv	2.5767	3337.05		14.693	22874.5					region	LAC	COG-rv	0.882	1264.66
	region	WCA	COO-rv	2.5767	3383.29		14.693	25971.9					region	LAC	COG-rv	0.882	1327.45
	region	SAF	COO-rv	2.5767	3383.29		17.9825	25971.9					region	WCA	COG-rs	0.882	1327.45
	region	SAF	COO-rv	2.5767	3388.14		17.9825	28098.4					region	WCA	COG-rs	0.882	1338.91
	region	IND	COO-rv	2.5767	3388.14		21.9298	28098.4					region	SAF	COG-rs	0.882	1338.91
	region	IND	COO-rv	2.5767	3388.74		21.9298	30236					region	SAF	COG-rs	0.882	1344.9
	region	OSA	COO-rv	2.5767	3388.74		26.2061	30236					region	CHN	COG-rs	0.882	1344.9
	region	OSA	COO-rv	2.5767	3388.78		26.2061	34125.6					region	CHN	COG-rs	0.882	1359.9
	region	OCN	COO-rv	2.5767	3388.78								region	OEA	COG-rs	0.882	1359.9
	region	OCN	COO-rv	2.5767	3389.42								region	OEA	COG-rs	0.882	1362.34
	region	PAS	COO-rv	2.5767	3389.42								region	OCN	COG-rs	0.882	1362.34
	region	PAS	COO-rv	2.5767	3394.13								region	OCN	COG-rs	0.882	1365.34
	region	LAC	COO-rv	2.5767	3394.13								region	FSU	COG-rv	1.005	1365.34
	region	LAC	COO-rv	2.5767	3430.09								region	FSU	COG-rv	1.005	1703.66
	region	MEE	COO-rv	2.655	3430.09								region	MEE	COG-rv	1.005	1703.66
	region	MEE	COO-rv	2.655	4501.59								region	MEE	COG-rv	1.005	2296.11
	region	MEE	COO-rs	2.655	4501.59								region	MEE	COG-rs	1.005	2296.11
	region	MEE	COO-rs	2.655	4506.51								region	MEE	COG-rs	1.005	2344.33
	region	FSU	COO-rv	2.96	4506.51								region	USA	COG-rv	1.2663	2344.33
	region	FSU	COO-rv	2.96	4671.8								region	USA	COG-rv	1.2663	2397.57
	region	MEE	COO-rs	2.96	4671.8								region	CAN	COG-rv	1.2663	2397.57
	region	MEE	COO-rs	2.96	4827.03								region	CAN	COG-rv	1.2663	2408.38
	region	USA	COO-rv	2.961	4827.03								region	WEU	COG-rv	1.2663	2408.38
	region	USA	COO-rv	2.961	4834.32								region	WEU	COG-rv	1.2663	2448.88
	region	EAF	COO-rv	2.961	4834.32								region	EEU	COG-rv	1.2663	2448.88
	region	EAF	COO-rv	2.961	4834.4								region	EEU	COG-rv	1.2663	2453.89
	region	WCA	COO-rv	2.961	4834.4								region	EAF	COG-rv	1.2663	2453.89
	region	WCA	COO-rv	2.961	4880.64								region	EAF	COG-rv	1.2663	2453.96
	region	SAF	COO-rv	2.961	4880.64								region	WCA	COG-rv	1.2663	2453.96
	region	SAF	COO-rv	2.961	4885.5								region	WCA	COG-rv	1.2663	2507.21
	region	IND	COO-rv	2.961	4885.5								region	SAF	COG-rv	1.2663	2507.21
	region	IND	COO-rv	2.961	4886.09								region	SAF	COG-rv	1.2663	2512.46
	region	OSA	COO-rv	2.961	4886.09								region	CHN	COG-rv	1.2663	2512.46
	region	OSA	COO-rv	2.961	4886.13								region	CHN	COG-rv	1.2663	2535.21
	region	OCN	COO-rv	2.961	4886.13								region	OEA	COG-rv	1.2663	2535.21
	region	OCN	COO-rv	2.961	4886.78								region	OEA	COG-rv	1.2663	2541.71
	region	PAS	COO-rv	2.961	4886.78								region	IND	COG-rv	1.2663	2541.71
	region	PAS	COO-rv	2.961	4891.48								region	IND	COG-rv	1.2663	2545.27
	region	LAC	COO-rv	2.961	4891.48								region	OSA	COG-rv	1.2663	2545.27
	region	LAC	COO-rv	2.961	4927.44								region	OSA	COG-rv	1.2663	2555.06
	region	USA	COO-rv	3.3453	4927.44								region	JPN	COG-rv	1.2663	2555.06
	region	USA	COO-rv	3.3453	4934.73								region	JPN	COG-rv	1.2663	2555.26
	region	EAF	COO-rv	3.3453	4934.73								region	OCN	COG-rv	1.2663	2555.26
	region	EAF	COO-rv	3.3453	4934.81								region	OCN	COG-rv	1.2663	2584.01
	region	WCA	COO-rv	3.3453	4934.81								region	PAS	COG-rv	1.2663	2584.01
	region	WCA	COO-rv	3.3453	4981.05								region	PAS	COG-rv	1.2663	2630.01
	region	SAF	COO-rv	3.3453	4981.05								region	LAC	COG-rv	1.2663	2630.01
	region	SAF	COO-rv	3.3453	4985.9								region	LAC	COG-rv	1.2663	2692.8
	region	IND	COO-rv	3.3453	4985.9								region	WCA	COG-rs	1.2663	2692.8
	region	IND	COO-rv	3.3453	4986.5								region	WCA	COG-rs	1.2663	2704.25
	region	OSA	COO-rv	3.3453	4986.5								region	SAF	COG-rs	1.2663	2704.25
	region	OSA	COO-rv	3.3453	4986.54								region	SAF	COG-rs	1.2663	2710.24
	region	OCN	COO-rv	3.3453	4986.54								region	CHN	COG-rs	1.2663	2710.24
	region	OCN	COO-rv	3.3453	4987.18								region	CHN	COG-rs	1.2663	2725.25
	region	PAS	COO-rv	3.3453	4987.18								region	OEA	COG-rs	1.2663	2725.25
	region	PAS	COO-rv	3.3453	4991.89								region	OEA	COG-rs	1.2663	2727.68
	region	LAC	COO-rv	3.3453	4991.89								region	OCN	COG-rs	1.2663	2727.68
	region	LAC	COO-rv	3.3453	5027.84								region	OCN	COG-rs	1.2663	2730.68
	region	FSU	COO-rv	3.435	5027.84								region	FSU	COG-rv	1.31	2730.68
	region	FSU	COO-rv	3.435	5193.13								region	FSU	COG-rv	1.31	3069
	region	MEE	COO-rs	3.435	5193.13								region	MEE	COG-rv	1.31	3069
	region	MEE	COO-rs	3.435	5348.36								region	MEE	COG-rv	1.31	3661.45
	region	NAF	COO-rv	3.48	5348.36								region	MEE	COG-rs	1.31	3661.45
	region	NAF	COO-rv	3.48	5356.25								region	MEE	COG-rs	1.31	3709.68
	region	USA	COO-rv	3.7296	5356.25								region	NAF	COG-rv	1.4	3709.68
	region	USA	COO-rv	3.7296	5389.46								region	NAF	COG-rv	1.4	3727.29
	region	CAN	COO-rv	3.7296	5389.46								region	FSU	COG-rv	1.615	3727.29
	region	CAN	COO-rv	3.7296	5391.12								region	FSU	COG-rv	1.615	4065.61
	region	EEU	COO-rv	3.7296	5391.12								region	MEE	COG-rv	1.615	4065.61
	region	EEU	COO-rv	3.7296	5391.33								region	MEE	COG-rv	1.615	4658.06
	region	EAF	COO-rv	3.7296	5391.33								region	MEE	COG-rs	1.615	4658.06
	region	EAF	COO-rv	3.7296	5392.22								region	MEE	COG-rs	1.615	4706.28
	region	WCA	COO-rv	3.7296	5392.22								region	USA	COG-rv	1.6506	4706.28
	region	WCA	COO-rv	3.7296	5409.48								region	USA	COG-rv	1.6506	4759.52
	region	SAF	COO-rv	3.7296	5409.48								region	CAN	COG-rv	1.6506	4759.52
	region	SAF	COO-rv	3.7296	5423.88								region	CAN	COG-rv	1.6506	4770.33
	region	CHN	COO-rv	3.7296	5423.88								region	WEU	COG-rv	1.6506	4770.33
	region	CHN	COO-rv	3.7296	5425.63								region	WEU	COG-rv	1.6506	4810.82
	region	OEA	COO-rv	3.7296	5425.63								region	EEU	COG-rv	1.6506	4810.82
	region	OEA	COO-rv	3.7296	5426.17								region	EEU	COG-rv	1.6506	4815.84
	region	IND	COO-rv	3.7296	5426.17								region	EAF	COG-rv	1.6506	4815.84
	region	IND	COO-rv	3.7296	5430.36								region	EAF	COG-rv	1.6506	4815.9
	region	OSA	COO-rv	3.7296	5430.36								region	WCA	COG-rv	1.6506	4815.9
	region	OSA	COO-rv	3.7296	5430.61								region	WCA	COG-rv	1.6506	4869.15
	region	OCN	COO-rv	3.7296	5430.61								region	SAF	COG-rv	1.6506	4869.15
	region	OCN	COO-rv	3.7296	5434.74								region	SAF	COG-rv	1.6506	4874.4
	region	PAS	COO-rv	3.7296	5434.74								region	CHN	COG-rv	1.6506	4874.4
	region	PAS	COO-rv	3.7296	5446.28								region	CHN	COG-rv	1.6506	4897.15
	region	LAC	COO-rv	3.7296	5446.28								region	OEA	COG-rv	1.6506	4897.15
	region	LAC	COO-rv	3.7296	5530.08								region	OEA	COG-rv	1.6506	4903.65
	region	USA	COO-rs	3.7296	5530.08								region	IND	COG-rv	1.6506	4903.65
	region	USA	COO-rs	3.7296	5540.59								region	IND	COG-rv	1.6506	4907.21
	region	WCA	COO-rs	3.7296	5540.59								region	OSA	COG-rv	1.6506	4907.21
	region	WCA	COO-rs	3.7296	5600.47								region	OSA	COG-rv	1.6506	4917
	region	SAF	COO-rs	3.7296	5600.47								region	JPN	COG-rv	1.6506	4917
	region	SAF	COO-rs	3.7296	5612.25								region	JPN	COG-rv	1.6506	4917.2
	region	PAS	COO-rs	3.7296	5612.25								region	OCN	COG-rv	1.6506	4917.2
	region	PAS	COO-rs	3.7296	5615.69								region	OCN	COG-rv	1.6506	4945.95
	region	LAC	COO-rs	3.7296	5615.69								region	PAS	COG-rv	1.6506	4945.95
	region	LAC	COO-rs	3.7296	5631.1								region	PAS	COG-rv	1.6506	4991.95
	region	FSU	COO-rv	3.91	5631.1								region	LAC	COG-rv	1.6506	4991.95
	region	FSU	COO-rv	3.91	5796.39								region	LAC	COG-rv	1.6506	5054.74
	region	MEE	COO-rs	3.91	5796.39								region	WCA	COG-rs	1.6506	5054.74
	region	MEE	COO-rs	3.91	5951.62								region	WCA	COG-rs	1.6506	5066.2
	region	NAF	COO-rv	4.09	5951.62								region	SAF	COG-rs	1.6506	5066.2
	region	NAF	COO-rv	4.09	5959.51								region	SAF	COG-rs	1.6506	5072.19
	region	USA	COO-rv	4.3281	5959.51								region	CHN	COG-rs	1.6506	5072.19
	region	USA	COO-rv	4.3281	5992.72								region	CHN	COG-rs	1.6506	5087.19
	region	CAN	COO-rv	4.3281	5992.72								region	OEA	COG-rs	1.6506	5087.19
	region	CAN	COO-rv	4.3281	5994.38								region	OEA	COG-rs	1.6506	5089.63
	region	EEU	COO-rv	4.3281	5994.38								region	OCN	COG-rs	1.6506	5089.63
	region	EEU	COO-rv	4.3281	5994.59								region	OCN	COG-rs	1.6506	5092.63
	region	EAF	COO-rv	4.3281	5994.59								region	FSU	COG-rv	1.92	5092.63
	region	EAF	COO-rv	4.3281	5995.47								region	FSU	COG-rv	1.92	5254.11
	region	WCA	COO-rv	4.3281	5995.47								region	FSU	COG-rs	1.92	5254.11
	region	WCA	COO-rv	4.3281	6012.73								region	FSU	COG-rs	1.92	5619.77
	region	SAF	COO-rv	4.3281	6012.73								region	MEE	COG-rs	1.92	5619.77
	region	SAF	COO-rv	4.3281	6027.13								region	MEE	COG-rs	1.92	5748.95
	region	CHN	COO-rv	4.3281	6027.13								region	NAF	COG-rv	2.01	5748.95
	region	CHN	COO-rv	4.3281	6028.88								region	NAF	COG-rv	2.01	5766.57
	region	OEA	COO-rv	4.3281	6028.88								region	USA	COG-rv	2.0349	5766.57
	region	OEA	COO-rv	4.3281	6029.43								region	USA	COG-rv	2.0349	5819.8
	region	IND	COO-rv	4.3281	6029.43								region	CAN	COG-rv	2.0349	5819.8
	region	IND	COO-rv	4.3281	6033.61								region	CAN	COG-rv	2.0349	5830.61
	region	OSA	COO-rv	4.3281	6033.61								region	WEU	COG-rv	2.0349	5830.61
	region	OSA	COO-rv	4.3281	6033.87								region	WEU	COG-rv	2.0349	5871.11
	region	OCN	COO-rv	4.3281	6033.87								region	EEU	COG-rv	2.0349	5871.11
	region	OCN	COO-rv	4.3281	6037.99								region	EEU	COG-rv	2.0349	5876.12
	region	PAS	COO-rv	4.3281	6037.99								region	EAF	COG-rv	2.0349	5876.12
	region	PAS	COO-rv	4.3281	6049.53								region	EAF	COG-rv	2.0349	5876.19
	region	LAC	COO-rv	4.3281	6049.53								region	WCA	COG-rv	2.0349	5876.19
	region	LAC	COO-rv	4.3281	6133.33								region	WCA	COG-rv	2.0349	5929.44
	region	USA	COO-rs	4.3281	6133.33								region	SAF	COG-rv	2.0349	5929.44
	region	USA	COO-rs	4.3281	6143.84								region	SAF	COG-rv	2.0349	5934.69
	region	WCA	COO-rs	4.3281	6143.84								region	CHN	COG-rv	2.0349	5934.69
	region	WCA	COO-rs	4.3281	6203.73								region	CHN	COG-rv	2.0349	5957.44
	region	SAF	COO-rs	4.3281	6203.73								region	OEA	COG-rv	2.0349	5957.44
	region	SAF	COO-rs	4.3281	6215.5								region	OEA	COG-rv	2.0349	5963.94
	region	PAS	COO-rs	4.3281	6215.5								region	IND	COG-rv	2.0349	5963.94
	region	PAS	COO-rs	4.3281	6218.95								region	IND	COG-rv	2.0349	5967.5
	region	LAC	COO-rs	4.3281	6218.95								region	OSA	COG-rv	2.0349	5967.5
	region	LAC	COO-rs	4.3281	6234.35								region	OSA	COG-rv	2.0349	5977.29
	region	FSU	COO-rv	4.385	6234.35								region	JPN	COG-rv	2.0349	5977.29
	region	FSU	COO-rv	4.385	6399.64								region	JPN	COG-rv	2.0349	5977.49
	region	MEE	COO-rs	4.385	6399.64								region	OCN	COG-rv	2.0349	5977.49
	region	MEE	COO-rs	4.385	6554.87								region	OCN	COG-rv	2.0349	6006.24
	region	NAF	COO-rv	4.7	6554.87								region	PAS	COG-rv	2.0349	6006.24
	region	NAF	COO-rv	4.7	6562.77								region	PAS	COG-rv	2.0349	6052.24
	region	FSU	COO-rv	4.86	6562.77								region	LAC	COG-rv	2.0349	6052.24
	region	FSU	COO-rv	4.86	6581.23								region	LAC	COG-rv	2.0349	6115.03
	region	FSU	COO-rs	4.86	6581.23								region	WCA	COG-rs	2.0349	6115.03
	region	FSU	COO-rs	4.86	6757.59								region	WCA	COG-rs	2.0349	6126.49
	region	MEE	COO-rs	4.86	6757.59								region	SAF	COG-rs	2.0349	6126.49
	region	MEE	COO-rs	4.86	6819.68								region	SAF	COG-rs	2.0349	6132.48
	region	USA	COO-rv	4.9266	6819.68								region	CHN	COG-rs	2.0349	6132.48
	region	USA	COO-rv	4.9266	6852.89								region	CHN	COG-rs	2.0349	6147.48
	region	CAN	COO-rv	4.9266	6852.89								region	OEA	COG-rs	2.0349	6147.48
	region	CAN	COO-rv	4.9266	6854.55								region	OEA	COG-rs	2.0349	6149.91
	region	EEU	COO-rv	4.9266	6854.55								region	OCN	COG-rs	2.0349	6149.91
	region	EEU	COO-rv	4.9266	6854.76								region	OCN	COG-rs	2.0349	6152.92
	region	EAF	COO-rv	4.9266	6854.76								region	FSU	COG-rv	2.135	6152.92
	region	EAF	COO-rv	4.9266	6855.64								region	FSU	COG-rv	2.135	6314.4
	region	WCA	COO-rv	4.9266	6855.64								region	FSU	COG-rs	2.135	6314.4
	region	WCA	COO-rv	4.9266	6872.91								region	FSU	COG-rs	2.135	6680.06
	region	SAF	COO-rv	4.9266	6872.91								region	MEE	COG-rs	2.135	6680.06
	region	SAF	COO-rv	4.9266	6887.3								region	MEE	COG-rs	2.135	6809.24
	region	CHN	COO-rv	4.9266	6887.3								region	FSU	COG-rv	2.35	6809.24
	region	CHN	COO-rv	4.9266	6889.06								region	FSU	COG-rv	2.35	6970.72
	region	OEA	COO-rv	4.9266	6889.06								region	FSU	COG-rs	2.35	6970.72
	region	OEA	COO-rv	4.9266	6889.6								region	FSU	COG-rs	2.35	7336.38
	region	IND	COO-rv	4.9266	6889.6								region	MEE	COG-rs	2.35	7336.38
	region	IND	COO-rv	4.9266	6893.78								region	MEE	COG-rs	2.35	7465.56
	region	OSA	COO-rv	4.9266	6893.78								region	USA	COG-rv	2.4192	7465.56
	region	OSA	COO-rv	4.9266	6894.04								region	USA	COG-rv	2.4192	7477.83
	region	OCN	COO-rv	4.9266	6894.04								region	CAN	COG-rv	2.4192	7477.83
	region	OCN	COO-rv	4.9266	6898.16								region	CAN	COG-rv	2.4192	7483.27
	region	PAS	COO-rv	4.9266	6898.16								region	WEU	COG-rv	2.4192	7483.27
	region	PAS	COO-rv	4.9266	6909.71								region	WEU	COG-rv	2.4192	7483.27
	region	LAC	COO-rv	4.9266	6909.71								region	EEU	COG-rv	2.4192	7483.27
	region	LAC	COO-rv	4.9266	6993.5								region	EEU	COG-rv	2.4192	7486.01
	region	USA	COO-rs	4.9266	6993.5								region	EAF	COG-rv	2.4192	7486.01
	region	USA	COO-rs	4.9266	7004.01								region	EAF	COG-rv	2.4192	7486.16
	region	WCA	COO-rs	4.9266	7004.01								region	IND	COG-rv	2.4192	7486.16
	region	WCA	COO-rs	4.9266	7063.9								region	IND	COG-rv	2.4192	7492.85
	region	SAF	COO-rs	4.9266	7063.9								region	OSA	COG-rv	2.4192	7492.85
	region	SAF	COO-rs	4.9266	7075.67								region	OSA	COG-rv	2.4192	7495.31
	region	PAS	COO-rs	4.9266	7075.67								region	JPN	COG-rv	2.4192	7495.31
	region	PAS	COO-rs	4.9266	7079.12								region	JPN	COG-rv	2.4192	7495.36
	region	LAC	COO-rs	4.9266	7079.12								region	PAS	COG-rv	2.4192	7495.36
	region	LAC	COO-rs	4.9266	7094.52								region	PAS	COG-rv	2.4192	7517.86
	region	NAF	COO-rv	5.31	7094.52								region	LAC	COG-rv	2.4192	7517.86
	region	NAF	COO-rv	5.31	7102.42								region	LAC	COG-rv	2.4192	7529.82
	region	FSU	COO-rv	5.395	7102.42								region	USA	COG-rs	2.4192	7529.82
	region	FSU	COO-rv	5.395	7120.88								region	USA	COG-rs	2.4192	7628.94
	region	FSU	COO-rs	5.395	7120.88								region	CAN	COG-rs	2.4192	7628.94
	region	FSU	COO-rs	5.395	7297.24								region	CAN	COG-rs	2.4192	7633.62
	region	MEE	COO-rs	5.395	7297.24								region	WEU	COG-rs	2.4192	7633.62
	region	MEE	COO-rs	5.395	7359.33								region	WEU	COG-rs	2.4192	7672.75
	region	USA	COO-rv	5.5251	7359.33								region	EEU	COG-rs	2.4192	7672.75
	region	USA	COO-rv	5.5251	7392.54								region	EEU	COG-rs	2.4192	7673.42
	region	CAN	COO-rv	5.5251	7392.54								region	WCA	COG-rs	2.4192	7673.42
	region	CAN	COO-rv	5.5251	7394.2								region	WCA	COG-rs	2.4192	7700.85
	region	EEU	COO-rv	5.5251	7394.2								region	SAF	COG-rs	2.4192	7700.85
	region	EEU	COO-rv	5.5251	7394.41								region	SAF	COG-rs	2.4192	7707.93
	region	EAF	COO-rv	5.5251	7394.41								region	CHN	COG-rs	2.4192	7707.93
	region	EAF	COO-rv	5.5251	7395.29								region	CHN	COG-rs	2.4192	7746.68
	region	WCA	COO-rv	5.5251	7395.29								region	OEA	COG-rs	2.4192	7746.68
	region	WCA	COO-rv	5.5251	7412.56								region	OEA	COG-rs	2.4192	7752.96
	region	SAF	COO-rv	5.5251	7412.56								region	IND	COG-rs	2.4192	7752.96
	region	SAF	COO-rv	5.5251	7426.95								region	IND	COG-rs	2.4192	7755.4
	region	CHN	COO-rv	5.5251	7426.95								region	OSA	COG-rs	2.4192	7755.4
	region	CHN	COO-rv	5.5251	7428.71								region	OSA	COG-rs	2.4192	7765.34
	region	OEA	COO-rv	5.5251	7428.71								region	OCN	COG-rs	2.4192	7765.34
	region	OEA	COO-rv	5.5251	7429.25								region	OCN	COG-rs	2.4192	7777.71
	region	IND	COO-rv	5.5251	7429.25								region	PAS	COG-rs	2.4192	7777.71
	region	IND	COO-rv	5.5251	7433.43								region	PAS	COG-rs	2.4192	7812.5
	region	OSA	COO-rv	5.5251	7433.43								region	LAC	COG-rs	2.4192	7812.5
	region	OSA	COO-rv	5.5251	7433.69								region	LAC	COG-rs	2.4192	7853.56
	region	OCN	COO-rv	5.5251	7433.69								region	FSU	COG-rv	2.565	7853.56
	region	OCN	COO-rv	5.5251	7437.81								region	FSU	COG-rv	2.565	8015.04
	region	PAS	COO-rv	5.5251	7437.81								region	FSU	COG-rs	2.565	8015.04
	region	PAS	COO-rv	5.5251	7449.36								region	FSU	COG-rs	2.565	8380.7
	region	LAC	COO-rv	5.5251	7449.36								region	MEE	COG-rs	2.565	8380.7
	region	LAC	COO-rv	5.5251	7533.15								region	MEE	COG-rs	2.565	8509.88
	region	USA	COO-rs	5.5251	7533.15								region	NAF	COG-rv	2.62	8509.88
	region	USA	COO-rs	5.5251	7543.66								region	NAF	COG-rv	2.62	8527.49
	region	WCA	COO-rs	5.5251	7543.66								region	USA	COG-rv	2.6901	8527.49
	region	WCA	COO-rs	5.5251	7603.55								region	USA	COG-rv	2.6901	8539.75
	region	SAF	COO-rs	5.5251	7603.55								region	CAN	COG-rv	2.6901	8539.75
	region	SAF	COO-rs	5.5251	7615.32								region	CAN	COG-rv	2.6901	8545.2
	region	PAS	COO-rs	5.5251	7615.32								region	WEU	COG-rv	2.6901	8545.2
	region	PAS	COO-rs	5.5251	7618.77								region	WEU	COG-rv	2.6901	8545.2
	region	LAC	COO-rs	5.5251	7618.77								region	EEU	COG-rv	2.6901	8545.2
	region	LAC	COO-rs	5.5251	7634.17								region	EEU	COG-rv	2.6901	8547.93
	region	NAF	COO-rv	5.92	7634.17								region	EAF	COG-rv	2.6901	8547.93
	region	NAF	COO-rv	5.92	7720.07								region	EAF	COG-rv	2.6901	8548.09
	region	FSU	COO-rv	5.93	7720.07								region	IND	COG-rv	2.6901	8548.09
	region	FSU	COO-rv	5.93	7738.53								region	IND	COG-rv	2.6901	8554.78
	region	FSU	COO-rs	5.93	7738.53								region	OSA	COG-rv	2.6901	8554.78
	region	FSU	COO-rs	5.93	7914.89								region	OSA	COG-rv	2.6901	8557.24
	region	MEE	COO-rs	5.93	7914.89								region	JPN	COG-rv	2.6901	8557.24
	region	MEE	COO-rs	5.93	7976.99								region	JPN	COG-rv	2.6901	8557.29
	region	CAN	COO-rv	6.1236	7976.99								region	PAS	COG-rv	2.6901	8557.29
	region	CAN	COO-rv	6.1236	7982.32								region	PAS	COG-rv	2.6901	8579.79
	region	WEU	COO-rv	6.1236	7982.32								region	LAC	COG-rv	2.6901	8579.79
	region	WEU	COO-rv	6.1236	8004.32								region	LAC	COG-rv	2.6901	8591.75
	region	EEU	COO-rv	6.1236	8004.32								region	USA	COG-rs	2.6901	8591.75
	region	EEU	COO-rv	6.1236	8005.61								region	USA	COG-rs	2.6901	8690.87
	region	EAF	COO-rv	6.1236	8005.61								region	CAN	COG-rs	2.6901	8690.87
	region	EAF	COO-rv	6.1236	8005.65								region	CAN	COG-rs	2.6901	8695.55
	region	CHN	COO-rv	6.1236	8005.65								region	WEU	COG-rs	2.6901	8695.55
	region	CHN	COO-rv	6.1236	8024.9								region	WEU	COG-rs	2.6901	8734.68
	region	OEA	COO-rv	6.1236	8024.9								region	EEU	COG-rs	2.6901	8734.68
	region	OEA	COO-rv	6.1236	8030.85								region	EEU	COG-rs	2.6901	8735.34
	region	IND	COO-rv	6.1236	8030.85								region	WCA	COG-rs	2.6901	8735.34
	region	IND	COO-rv	6.1236	8034.32								region	WCA	COG-rs	2.6901	8762.78
	region	OSA	COO-rv	6.1236	8034.32								region	SAF	COG-rs	2.6901	8762.78
	region	OSA	COO-rv	6.1236	8034.53								region	SAF	COG-rs	2.6901	8769.86
	region	OCN	COO-rv	6.1236	8034.53								region	CHN	COG-rs	2.6901	8769.86
	region	OCN	COO-rv	6.1236	8035.76								region	CHN	COG-rs	2.6901	8808.61
	region	USA	COO-rs	6.1236	8035.76								region	OEA	COG-rs	2.6901	8808.61
	region	USA	COO-rs	6.1236	8101.17								region	OEA	COG-rs	2.6901	8814.89
	region	CAN	COO-rs	6.1236	8101.17								region	IND	COG-rs	2.6901	8814.89
	region	CAN	COO-rs	6.1236	8102.44								region	IND	COG-rs	2.6901	8817.33
	region	WEU	COO-rs	6.1236	8102.44								region	OSA	COG-rs	2.6901	8817.33
	region	WEU	COO-rs	6.1236	8123.57								region	OSA	COG-rs	2.6901	8827.27
	region	EEU	COO-rs	6.1236	8123.57								region	OCN	COG-rs	2.6901	8827.27
	region	EEU	COO-rs	6.1236	8123.98								region	OCN	COG-rs	2.6901	8839.64
	region	EAF	COO-rs	6.1236	8123.98								region	PAS	COG-rs	2.6901	8839.64
	region	EAF	COO-rs	6.1236	8126.8								region	PAS	COG-rs	2.6901	8874.43
	region	WCA	COO-rs	6.1236	8126.8								region	LAC	COG-rs	2.6901	8874.43
	region	WCA	COO-rs	6.1236	8137.21								region	LAC	COG-rs	2.6901	8915.48
	region	SAF	COO-rs	6.1236	8137.21								region	FSU	COG-rs	2.78	8915.48
	region	SAF	COO-rs	6.1236	8160.6								region	FSU	COG-rs	2.78	9150.95
	region	CHN	COO-rs	6.1236	8160.6								region	MEE	COG-rs	2.78	9150.95
	region	CHN	COO-rs	6.1236	8166.7								region	MEE	COG-rs	2.78	9202.62
	region	OEA	COO-rs	6.1236	8166.7								region	USA	COG-rv	2.961	9202.62
	region	OEA	COO-rs	6.1236	8168.72								region	USA	COG-rv	2.961	9214.88
	region	IND	COO-rs	6.1236	8168.72								region	CAN	COG-rv	2.961	9214.88
	region	IND	COO-rs	6.1236	8172.28								region	CAN	COG-rv	2.961	9220.32
	region	OSA	COO-rs	6.1236	8172.28								region	WEU	COG-rv	2.961	9220.32
	region	OSA	COO-rs	6.1236	8175.01								region	WEU	COG-rv	2.961	9220.32
	region	OCN	COO-rs	6.1236	8175.01								region	EEU	COG-rv	2.961	9220.32
	region	OCN	COO-rs	6.1236	8184.98								region	EEU	COG-rv	2.961	9223.06
	region	PAS	COO-rs	6.1236	8184.98								region	EAF	COG-rv	2.961	9223.06
	region	PAS	COO-rs	6.1236	8201.3								region	EAF	COG-rv	2.961	9223.22
	region	LAC	COO-rs	6.1236	8201.3								region	IND	COG-rv	2.961	9223.22
	region	LAC	COO-rs	6.1236	8316.38								region	IND	COG-rv	2.961	9229.91
	region	ARC	COO-rs	6.1236	8316.38								region	OSA	COG-rv	2.961	9229.91
	region	ARC	COO-rs	6.1236	8340.38								region	OSA	COG-rv	2.961	9232.37
	region	FSU	COO-rv	6.465	8340.38								region	JPN	COG-rv	2.961	9232.37
	region	FSU	COO-rv	6.465	8358.84								region	JPN	COG-rv	2.961	9232.42
	region	FSU	COO-rs	6.465	8358.84								region	PAS	COG-rv	2.961	9232.42
	region	FSU	COO-rs	6.465	8535.2								region	PAS	COG-rv	2.961	9254.92
	region	MEE	COO-rs	6.465	8535.2								region	LAC	COG-rv	2.961	9254.92
	region	MEE	COO-rs	6.465	8597.29								region	LAC	COG-rv	2.961	9266.88
	region	CAN	COO-rv	6.7977	8597.29								region	USA	COG-rs	2.961	9266.88
	region	CAN	COO-rv	6.7977	8602.63								region	USA	COG-rs	2.961	9366
	region	WEU	COO-rv	6.7977	8602.63								region	CAN	COG-rs	2.961	9366
	region	WEU	COO-rv	6.7977	8624.63								region	CAN	COG-rs	2.961	9370.68
	region	EEU	COO-rv	6.7977	8624.63								region	WEU	COG-rs	2.961	9370.68
	region	EEU	COO-rv	6.7977	8625.92								region	WEU	COG-rs	2.961	9409.8
	region	EAF	COO-rv	6.7977	8625.92								region	EEU	COG-rs	2.961	9409.8
	region	EAF	COO-rv	6.7977	8625.95								region	EEU	COG-rs	2.961	9410.47
	region	CHN	COO-rv	6.7977	8625.95								region	WCA	COG-rs	2.961	9410.47
	region	CHN	COO-rv	6.7977	8645.2								region	WCA	COG-rs	2.961	9437.9
	region	OEA	COO-rv	6.7977	8645.2								region	SAF	COG-rs	2.961	9437.9
	region	OEA	COO-rv	6.7977	8651.16								region	SAF	COG-rs	2.961	9444.99
	region	IND	COO-rv	6.7977	8651.16								region	CHN	COG-rs	2.961	9444.99
	region	IND	COO-rv	6.7977	8654.62								region	CHN	COG-rs	2.961	9483.74
	region	OSA	COO-rv	6.7977	8654.62								region	OEA	COG-rs	2.961	9483.74
	region	OSA	COO-rv	6.7977	8654.83								region	OEA	COG-rs	2.961	9490.02
	region	OCN	COO-rv	6.7977	8654.83								region	IND	COG-rs	2.961	9490.02
	region	OCN	COO-rv	6.7977	8656.06								region	IND	COG-rs	2.961	9492.46
	region	USA	COO-rs	6.7977	8656.06								region	OSA	COG-rs	2.961	9492.46
	region	USA	COO-rs	6.7977	8721.48								region	OSA	COG-rs	2.961	9502.39
	region	CAN	COO-rs	6.7977	8721.48								region	OCN	COG-rs	2.961	9502.39
	region	CAN	COO-rs	6.7977	8722.74								region	OCN	COG-rs	2.961	9514.77
	region	WEU	COO-rs	6.7977	8722.74								region	PAS	COG-rs	2.961	9514.77
	region	WEU	COO-rs	6.7977	8743.87								region	PAS	COG-rs	2.961	9549.56
	region	EEU	COO-rs	6.7977	8743.87								region	LAC	COG-rs	2.961	9549.56
	region	EEU	COO-rs	6.7977	8744.28								region	LAC	COG-rs	2.961	9590.61
	region	EAF	COO-rs	6.7977	8744.28								region	NAF	COG-rv	3.23	9590.61
	region	EAF	COO-rs	6.7977	8747.11								region	NAF	COG-rv	3.23	9608.22
	region	WCA	COO-rs	6.7977	8747.11								region	USA	COG-rv	3.2319	9608.22
	region	WCA	COO-rs	6.7977	8757.52								region	USA	COG-rv	3.2319	9620.49
	region	SAF	COO-rs	6.7977	8757.52								region	CAN	COG-rv	3.2319	9620.49
	region	SAF	COO-rs	6.7977	8780.91								region	CAN	COG-rv	3.2319	9625.93
	region	CHN	COO-rs	6.7977	8780.91								region	WEU	COG-rv	3.2319	9625.93
	region	CHN	COO-rs	6.7977	8787.01								region	WEU	COG-rv	3.2319	9625.93
	region	OEA	COO-rs	6.7977	8787.01								region	EEU	COG-rv	3.2319	9625.93
	region	OEA	COO-rs	6.7977	8789.02								region	EEU	COG-rv	3.2319	9628.67
	region	IND	COO-rs	6.7977	8789.02								region	EAF	COG-rv	3.2319	9628.67
	region	IND	COO-rs	6.7977	8792.59								region	EAF	COG-rv	3.2319	9628.82
	region	OSA	COO-rs	6.7977	8792.59								region	IND	COG-rv	3.2319	9628.82
	region	OSA	COO-rs	6.7977	8795.31								region	IND	COG-rv	3.2319	9635.51
	region	OCN	COO-rs	6.7977	8795.31								region	OSA	COG-rv	3.2319	9635.51
	region	OCN	COO-rs	6.7977	8805.29								region	OSA	COG-rv	3.2319	9637.97
	region	PAS	COO-rs	6.7977	8805.29								region	JPN	COG-rv	3.2319	9637.97
	region	PAS	COO-rs	6.7977	8821.61								region	JPN	COG-rv	3.2319	9638.02
	region	LAC	COO-rs	6.7977	8821.61								region	PAS	COG-rv	3.2319	9638.02
	region	LAC	COO-rs	6.7977	8936.69								region	PAS	COG-rv	3.2319	9660.52
	region	ARC	COO-rs	6.7977	8936.69								region	LAC	COG-rv	3.2319	9660.52
	region	ARC	COO-rs	6.7977	8960.68								region	LAC	COG-rv	3.2319	9672.48
	region	NAF	COO-rv	6.87	8960.68								region	USA	COG-rs	3.2319	9672.48
	region	NAF	COO-rv	6.87	9046.58								region	USA	COG-rs	3.2319	9771.6
	region	USA	EHO-rv	6.94372	9046.58								region	CAN	COG-rs	3.2319	9771.6
	region	USA	EHO-rv	6.94372	9050.97								region	CAN	COG-rs	3.2319	9776.28
	region	CAN	EHO-rv	6.94372	9050.97								region	WEU	COG-rs	3.2319	9776.28
	region	CAN	EHO-rv	6.94372	9050.98								region	WEU	COG-rs	3.2319	9815.41
	region	WEU	EHO-rv	6.94372	9050.98								region	EEU	COG-rs	3.2319	9815.41
	region	WEU	EHO-rv	6.94372	9051.01								region	EEU	COG-rs	3.2319	9816.08
	region	EEU	EHO-rv	6.94372	9051.01								region	WCA	COG-rs	3.2319	9816.08
	region	EEU	EHO-rv	6.94372	9051.02								region	WCA	COG-rs	3.2319	9843.51
	region	CHN	EHO-rv	6.94372	9051.02								region	SAF	COG-rs	3.2319	9843.51
	region	CHN	EHO-rv	6.94372	9051.51								region	SAF	COG-rs	3.2319	9850.59
	region	LAC	EHO-rv	6.94372	9051.51								region	CHN	COG-rs	3.2319	9850.59
	region	LAC	EHO-rv	6.94372	9073.7								region	CHN	COG-rs	3.2319	9889.34
	region	CAN	TAO-rv	6.94372	9073.7								region	OEA	COG-rs	3.2319	9889.34
	region	CAN	TAO-rv	6.94372	9149.55								region	OEA	COG-rs	3.2319	9895.62
	region	WEU	TAO-rv	6.94372	9149.55								region	IND	COG-rs	3.2319	9895.62
	region	WEU	TAO-rv	6.94372	9149.59								region	IND	COG-rs	3.2319	9898.06
	region	WCA	TAO-rv	6.94372	9149.59								region	OSA	COG-rs	3.2319	9898.06
	region	WCA	TAO-rv	6.94372	9149.99								region	OSA	COG-rs	3.2319	9908
	region	SAF	TAO-rv	6.94372	9149.99								region	OCN	COG-rs	3.2319	9908
	region	SAF	TAO-rv	6.94372	9150.3								region	OCN	COG-rs	3.2319	9920.37
	region	PAS	TAO-rv	6.94372	9150.3								region	PAS	COG-rs	3.2319	9920.37
	region	PAS	TAO-rv	6.94372	9150.45								region	PAS	COG-rs	3.2319	9955.16
	region	USA	SHO-rv	6.94372	9150.45								region	LAC	COG-rs	3.2319	9955.16
	region	USA	SHO-rv	6.94372	9240.81								region	LAC	COG-rs	3.2319	9996.22
	region	WEU	SHO-rv	6.94372	9240.81								region	FSU	COG-rs	3.335	9996.22
	region	WEU	SHO-rv	6.94372	9241								region	FSU	COG-rs	3.335	10231.7
	region	EEU	SHO-rv	6.94372	9241								region	MEE	COG-rs	3.335	10231.7
	region	EEU	SHO-rv	6.94372	9241								region	MEE	COG-rs	3.335	10283.4
	region	CHN	SHO-rv	6.94372	9241								region	USA	CMG-rv	3.45	10283.4
	region	CHN	SHO-rv	6.94372	9241.79								region	USA	CMG-rv	3.45	10469.6
	region	OCN	SHO-rv	6.94372	9241.79								region	CAN	CMG-rv	3.45	10469.6
	region	OCN	SHO-rv	6.94372	9242.86								region	CAN	CMG-rv	3.45	10521.8
	region	PAS	SHO-rv	6.94372	9242.86								region	WEU	CMG-rv	3.45	10521.8
	region	PAS	SHO-rv	6.94372	9243.37								region	WEU	CMG-rv	3.45	10574
	region	LAC	SHO-rv	6.94372	9243.37								region	EEU	CMG-rv	3.45	10574
	region	LAC	SHO-rv	6.94372	9243.83								region	EEU	CMG-rv	3.45	10589
	region	FSU	COO-rs	7	9243.83								region	EAF	CMG-rv	3.45	10589
	region	FSU	COO-rs	7	9319.47								region	EAF	CMG-rv	3.45	10604
	region	CAN	COO-rv	7.4718	9319.47								region	WCA	CMG-rv	3.45	10604
	region	CAN	COO-rv	7.4718	9324.81								region	WCA	CMG-rv	3.45	10619
	region	WEU	COO-rv	7.4718	9324.81								region	SAF	CMG-rv	3.45	10619
	region	WEU	COO-rv	7.4718	9346.81								region	SAF	CMG-rv	3.45	10634
	region	EEU	COO-rv	7.4718	9346.81								region	CHN	CMG-rv	3.45	10634
	region	EEU	COO-rv	7.4718	9348.1								region	CHN	CMG-rv	3.45	10745.8
	region	EAF	COO-rv	7.4718	9348.1								region	IND	CMG-rv	3.45	10745.8
	region	EAF	COO-rv	7.4718	9348.13								region	IND	CMG-rv	3.45	10798
	region	CHN	COO-rv	7.4718	9348.13								region	OSA	CMG-rv	3.45	10798
	region	CHN	COO-rv	7.4718	9367.38								region	OSA	CMG-rv	3.45	10805.4
	region	OEA	COO-rv	7.4718	9367.38								region	JPN	CMG-rv	3.45	10805.4
	region	OEA	COO-rv	7.4718	9373.34								region	JPN	CMG-rv	3.45	10812.8
	region	IND	COO-rv	7.4718	9373.34								region	OCN	CMG-rv	3.45	10812.8
	region	IND	COO-rv	7.4718	9376.8								region	OCN	CMG-rv	3.45	10850
	region	OSA	COO-rv	7.4718	9376.8								region	PAS	CMG-rv	3.45	10850
	region	OSA	COO-rv	7.4718	9377.01								region	PAS	CMG-rv	3.45	10857.4
	region	OCN	COO-rv	7.4718	9377.01								region	LAC	CMG-rv	3.45	10857.4
	region	OCN	COO-rv	7.4718	9378.24								region	LAC	CMG-rv	3.45	10902.2
	region	USA	COO-rs	7.4718	9378.24								region	USA	TIG-rv	3.45	10902.2
	region	USA	COO-rs	7.4718	9443.66								region	USA	TIG-rv	3.45	11125.8
	region	CAN	COO-rs	7.4718	9443.66								region	CAN	TIG-rv	3.45	11125.8
	region	CAN	COO-rs	7.4718	9444.92								region	CAN	TIG-rv	3.45	11237.6
	region	WEU	COO-rs	7.4718	9444.92								region	WEU	TIG-rv	3.45	11237.6
	region	WEU	COO-rs	7.4718	9466.05								region	WEU	TIG-rv	3.45	11267.4
	region	EEU	COO-rs	7.4718	9466.05								region	EEU	TIG-rv	3.45	11267.4
	region	EEU	COO-rs	7.4718	9466.46								region	EEU	TIG-rv	3.45	11297.2
	region	EAF	COO-rs	7.4718	9466.46								region	EAF	TIG-rv	3.45	11297.2
	region	EAF	COO-rs	7.4718	9469.29								region	EAF	TIG-rv	3.45	11327
	region	WCA	COO-rs	7.4718	9469.29								region	WCA	TIG-rv	3.45	11327
	region	WCA	COO-rs	7.4718	9479.7								region	WCA	TIG-rv	3.45	11416.4
	region	SAF	COO-rs	7.4718	9479.7								region	SAF	TIG-rv	3.45	11416.4
	region	SAF	COO-rs	7.4718	9503.09								region	SAF	TIG-rv	3.45	11438.8
	region	CHN	COO-rs	7.4718	9503.09								region	CHN	TIG-rv	3.45	11438.8
	region	CHN	COO-rs	7.4718	9509.19								region	CHN	TIG-rv	3.45	11461.2
	region	OEA	COO-rs	7.4718	9509.19								region	OEA	TIG-rv	3.45	11461.2
	region	OEA	COO-rs	7.4718	9511.2								region	OEA	TIG-rv	3.45	11483.6
	region	IND	COO-rs	7.4718	9511.2								region	IND	TIG-rv	3.45	11483.6
	region	IND	COO-rs	7.4718	9514.76								region	IND	TIG-rv	3.45	11506
	region	OSA	COO-rs	7.4718	9514.76								region	OSA	TIG-rv	3.45	11506
	region	OSA	COO-rs	7.4718	9517.49								region	OSA	TIG-rv	3.45	11550.8
	region	OCN	COO-rs	7.4718	9517.49								region	OCN	TIG-rv	3.45	11550.8
	region	OCN	COO-rs	7.4718	9527.46								region	OCN	TIG-rv	3.45	11580.6
	region	PAS	COO-rs	7.4718	9527.46								region	PAS	TIG-rv	3.45	11580.6
	region	PAS	COO-rs	7.4718	9543.79								region	PAS	TIG-rv	3.45	11625.4
	region	LAC	COO-rs	7.4718	9543.79								region	LAC	TIG-rv	3.45	11625.4
	region	LAC	COO-rs	7.4718	9658.87								region	LAC	TIG-rv	3.45	11670.2
	region	ARC	COO-rs	7.4718	9658.87								region	EAF	COG-rv	3.5028	11670.2
	region	ARC	COO-rs	7.4718	9682.86								region	EAF	COG-rv	3.5028	11670.2
	region	NAF	COO-rv	7.82	9682.86								region	USA	COG-rs	3.5028	11670.2
	region	NAF	COO-rv	7.82	9768.76								region	USA	COG-rs	3.5028	11731.5
	region	FSU	COO-rs	7.855	9768.76								region	CAN	COG-rs	3.5028	11731.5
	region	FSU	COO-rs	7.855	9844.4								region	CAN	COG-rs	3.5028	11761.6
	region	FSU	EHO-rv	7.89474	9844.4								region	WEU	COG-rs	3.5028	11761.6
	region	FSU	EHO-rv	7.89474	9844.45								region	WEU	COG-rs	3.5028	11781.1
	region	NAF	EHO-rv	7.89474	9844.45								region	EEU	COG-rs	3.5028	11781.1
	region	NAF	EHO-rv	7.89474	9844.47								region	EEU	COG-rs	3.5028	11783.7
	region	MEE	EHO-rv	7.89474	9844.47								region	EAF	COG-rs	3.5028	11783.7
	region	MEE	EHO-rv	7.89474	9844.48								region	EAF	COG-rs	3.5028	11787.6
	region	FSU	TAO-rv	7.89474	9844.48								region	WCA	COG-rs	3.5028	11787.6
	region	FSU	TAO-rv	7.89474	9887.68								region	WCA	COG-rs	3.5028	11794.4
	region	FSU	SHO-rv	7.89474	9887.68								region	SAF	COG-rs	3.5028	11794.4
	region	FSU	SHO-rv	7.89474	9888.27								region	SAF	COG-rs	3.5028	11797.7
	region	NAF	SHO-rv	7.89474	9888.27								region	CHN	COG-rs	3.5028	11797.7
	region	NAF	SHO-rv	7.89474	9888.71								region	CHN	COG-rs	3.5028	11817.1
	region	MEE	SHO-rv	7.89474	9888.71								region	OEA	COG-rs	3.5028	11817.1
	region	MEE	SHO-rv	7.89474	9898.28								region	OEA	COG-rs	3.5028	11820.3
	region	CAN	COO-rv	8.1459	9898.28								region	IND	COG-rs	3.5028	11820.3
	region	CAN	COO-rv	8.1459	9903.62								region	IND	COG-rs	3.5028	11823.9
	region	WEU	COO-rv	8.1459	9903.62								region	OSA	COG-rs	3.5028	11823.9
	region	WEU	COO-rv	8.1459	9925.62								region	OSA	COG-rs	3.5028	11831.3
	region	EEU	COO-rv	8.1459	9925.62								region	OCN	COG-rs	3.5028	11831.3
	region	EEU	COO-rv	8.1459	9926.91								region	OCN	COG-rs	3.5028	11835.4
	region	EAF	COO-rv	8.1459	9926.91								region	PAS	COG-rs	3.5028	11835.4
	region	EAF	COO-rv	8.1459	9926.94								region	PAS	COG-rs	3.5028	11869.7
	region	CHN	COO-rv	8.1459	9926.94								region	LAC	COG-rs	3.5028	11869.7
	region	CHN	COO-rv	8.1459	9946.19								region	LAC	COG-rs	3.5028	11906.9
	region	OEA	COO-rv	8.1459	9946.19								region	ARC	COG-rs	3.5028	11906.9
	region	OEA	COO-rv	8.1459	9952.15								region	ARC	COG-rs	3.5028	11961.5
	region	IND	COO-rv	8.1459	9952.15								region	NAF	COG-rv	3.84	11961.5
	region	IND	COO-rv	8.1459	9955.61								region	NAF	COG-rv	3.84	12002.6
	region	OSA	COO-rv	8.1459	9955.61								region	FSU	COG-rs	3.89	12002.6
	region	OSA	COO-rv	8.1459	9955.82								region	FSU	COG-rs	3.89	12238.1
	region	OCN	COO-rv	8.1459	9955.82								region	MEE	COG-rs	3.89	12238.1
	region	OCN	COO-rv	8.1459	9957.05								region	MEE	COG-rs	3.89	12289.7
	region	USA	COO-rs	8.1459	9957.05								region	FSU	TIG-rv	4.05	12289.7
	region	USA	COO-rs	8.1459	10022.5								region	FSU	TIG-rv	4.05	12435.8
	region	CAN	COO-rs	8.1459	10022.5								region	NAF	TIG-rv	4.05	12435.8
	region	CAN	COO-rs	8.1459	10023.7								region	NAF	TIG-rv	4.05	12477.5
	region	WEU	COO-rs	8.1459	10023.7								region	MEE	TIG-rv	4.05	12477.5
	region	WEU	COO-rs	8.1459	10044.9								region	MEE	TIG-rv	4.05	12555.7
	region	EEU	COO-rs	8.1459	10044.9								region	EAF	COG-rv	4.2021	12555.7
	region	EEU	COO-rs	8.1459	10045.3								region	EAF	COG-rv	4.2021	12555.8
	region	EAF	COO-rs	8.1459	10045.3								region	USA	COG-rs	4.2021	12555.8
	region	EAF	COO-rs	8.1459	10048.1								region	USA	COG-rs	4.2021	12617.1
	region	WCA	COO-rs	8.1459	10048.1								region	CAN	COG-rs	4.2021	12617.1
	region	WCA	COO-rs	8.1459	10058.5								region	CAN	COG-rs	4.2021	12647.1
	region	SAF	COO-rs	8.1459	10058.5								region	WEU	COG-rs	4.2021	12647.1
	region	SAF	COO-rs	8.1459	10081.9								region	WEU	COG-rs	4.2021	12666.7
	region	CHN	COO-rs	8.1459	10081.9								region	EEU	COG-rs	4.2021	12666.7
	region	CHN	COO-rs	8.1459	10088								region	EEU	COG-rs	4.2021	12669.3
	region	OEA	COO-rs	8.1459	10088								region	EAF	COG-rs	4.2021	12669.3
	region	OEA	COO-rs	8.1459	10090								region	EAF	COG-rs	4.2021	12673.1
	region	IND	COO-rs	8.1459	10090								region	WCA	COG-rs	4.2021	12673.1
	region	IND	COO-rs	8.1459	10093.6								region	WCA	COG-rs	4.2021	12680
	region	OSA	COO-rs	8.1459	10093.6								region	SAF	COG-rs	4.2021	12680
	region	OSA	COO-rs	8.1459	10096.3								region	SAF	COG-rs	4.2021	12683.3
	region	OCN	COO-rs	8.1459	10096.3								region	CHN	COG-rs	4.2021	12683.3
	region	OCN	COO-rs	8.1459	10106.3								region	CHN	COG-rs	4.2021	12702.7
	region	PAS	COO-rs	8.1459	10106.3								region	OEA	COG-rs	4.2021	12702.7
	region	PAS	COO-rs	8.1459	10122.6								region	OEA	COG-rs	4.2021	12705.8
	region	LAC	COO-rs	8.1459	10122.6								region	IND	COG-rs	4.2021	12705.8
	region	LAC	COO-rs	8.1459	10237.7								region	IND	COG-rs	4.2021	12709.5
	region	ARC	COO-rs	8.1459	10237.7								region	OSA	COG-rs	4.2021	12709.5
	region	ARC	COO-rs	8.1459	10261.7								region	OSA	COG-rs	4.2021	12716.8
	region	USA	EHO-rv	8.68056	10261.7								region	OCN	COG-rs	4.2021	12716.8
	region	USA	EHO-rv	8.68056	10268.3								region	OCN	COG-rs	4.2021	12721
	region	CAN	EHO-rv	8.68056	10268.3								region	PAS	COG-rs	4.2021	12721
	region	CAN	EHO-rv	8.68056	10268.3								region	PAS	COG-rs	4.2021	12755.3
	region	WEU	EHO-rv	8.68056	10268.3								region	LAC	COG-rs	4.2021	12755.3
	region	WEU	EHO-rv	8.68056	10268.4								region	LAC	COG-rs	4.2021	12792.5
	region	EEU	EHO-rv	8.68056	10268.4								region	ARC	COG-rs	4.2021	12792.5
	region	EEU	EHO-rv	8.68056	10268.4								region	ARC	COG-rs	4.2021	12847.1
	region	CHN	EHO-rv	8.68056	10268.4								region	USA	CMG-rv	4.255	12847.1
	region	CHN	EHO-rv	8.68056	10268.9								region	USA	CMG-rv	4.255	13079.8
	region	LAC	EHO-rv	8.68056	10268.9								region	CAN	CMG-rv	4.255	13079.8
	region	LAC	EHO-rv	8.68056	10304.4								region	CAN	CMG-rv	4.255	13145.1
	region	CAN	TAO-rv	8.68056	10304.4								region	WEU	CMG-rv	4.255	13145.1
	region	CAN	TAO-rv	8.68056	10418.2								region	WEU	CMG-rv	4.255	13210.3
	region	WEU	TAO-rv	8.68056	10418.2								region	EEU	CMG-rv	4.255	13210.3
	region	WEU	TAO-rv	8.68056	10418.3								region	EEU	CMG-rv	4.255	13229.1
	region	EAF	TAO-rv	8.68056	10418.3								region	EAF	CMG-rv	4.255	13229.1
	region	EAF	TAO-rv	8.68056	10418.4								region	EAF	CMG-rv	4.255	13247.8
	region	WCA	TAO-rv	8.68056	10418.4								region	WCA	CMG-rv	4.255	13247.8
	region	WCA	TAO-rv	8.68056	10418.8								region	WCA	CMG-rv	4.255	13266.6
	region	SAF	TAO-rv	8.68056	10418.8								region	SAF	CMG-rv	4.255	13266.6
	region	SAF	TAO-rv	8.68056	10419								region	SAF	CMG-rv	4.255	13285.3
	region	PAS	TAO-rv	8.68056	10419								region	CHN	CMG-rv	4.255	13285.3
	region	PAS	TAO-rv	8.68056	10419.4								region	CHN	CMG-rv	4.255	13425.1
	region	USA	SHO-rv	8.68056	10419.4								region	IND	CMG-rv	4.255	13425.1
	region	USA	SHO-rv	8.68056	10554.9								region	IND	CMG-rv	4.255	13490.3
	region	WEU	SHO-rv	8.68056	10554.9								region	OSA	CMG-rv	4.255	13490.3
	region	WEU	SHO-rv	8.68056	10555.4								region	OSA	CMG-rv	4.255	13499.6
	region	EEU	SHO-rv	8.68056	10555.4								region	JPN	CMG-rv	4.255	13499.6
	region	EEU	SHO-rv	8.68056	10555.4								region	JPN	CMG-rv	4.255	13508.8
	region	CHN	SHO-rv	8.68056	10555.4								region	OCN	CMG-rv	4.255	13508.8
	region	CHN	SHO-rv	8.68056	10556.2								region	OCN	CMG-rv	4.255	13555.3
	region	OCN	SHO-rv	8.68056	10556.2								region	PAS	CMG-rv	4.255	13555.3
	region	OCN	SHO-rv	8.68056	10559								region	PAS	CMG-rv	4.255	13564.6
	region	PAS	SHO-rv	8.68056	10559								region	LAC	CMG-rv	4.255	13564.6
	region	PAS	SHO-rv	8.68056	10560.4								region	LAC	CMG-rv	4.255	13620.6
	region	LAC	SHO-rv	8.68056	10560.4								region	USA	TIG-rv	4.255	13620.6
	region	LAC	SHO-rv	8.68056	10561.1								region	USA	TIG-rv	4.255	13900.1
	region	FSU	COO-rs	8.71	10561.1								region	CAN	TIG-rv	4.255	13900.1
	region	FSU	COO-rs	8.71	10636.8								region	CAN	TIG-rv	4.255	14039.8
	region	NAF	COO-rv	8.77	10636.8								region	WEU	TIG-rv	4.255	14039.8
	region	NAF	COO-rv	8.77	10722.7								region	WEU	TIG-rv	4.255	14077.1
	region	USA	COO-rs	8.82	10722.7								region	EEU	TIG-rv	4.255	14077.1
	region	USA	COO-rs	8.82	10751.7								region	EEU	TIG-rv	4.255	14114.3
	region	CAN	COO-rs	8.82	10751.7								region	EAF	TIG-rv	4.255	14114.3
	region	CAN	COO-rs	8.82	10775.7								region	EAF	TIG-rv	4.255	14151.6
	region	WEU	COO-rs	8.82	10775.7								region	WCA	TIG-rv	4.255	14151.6
	region	WEU	COO-rs	8.82	10801.1								region	WCA	TIG-rv	4.255	14263.3
	region	EEU	COO-rs	8.82	10801.1								region	SAF	TIG-rv	4.255	14263.3
	region	EEU	COO-rs	8.82	10803.9								region	SAF	TIG-rv	4.255	14291.3
	region	EAF	COO-rs	8.82	10803.9								region	CHN	TIG-rv	4.255	14291.3
	region	EAF	COO-rs	8.82	10804.4								region	CHN	TIG-rv	4.255	14319.3
	region	WCA	COO-rs	8.82	10804.4								region	OEA	TIG-rv	4.255	14319.3
	region	WCA	COO-rs	8.82	10809.6								region	OEA	TIG-rv	4.255	14347.3
	region	SAF	COO-rs	8.82	10809.6								region	IND	TIG-rv	4.255	14347.3
	region	SAF	COO-rs	8.82	10811.9								region	IND	TIG-rv	4.255	14375.3
	region	CHN	COO-rs	8.82	10811.9								region	OSA	TIG-rv	4.255	14375.3
	region	CHN	COO-rs	8.82	10830								region	OSA	TIG-rv	4.255	14431.3
	region	OEA	COO-rs	8.82	10830								region	OCN	TIG-rv	4.255	14431.3
	region	OEA	COO-rs	8.82	10836								region	OCN	TIG-rv	4.255	14468.6
	region	IND	COO-rs	8.82	10836								region	PAS	TIG-rv	4.255	14468.6
	region	IND	COO-rs	8.82	10836.7								region	PAS	TIG-rv	4.255	14524.6
	region	OSA	COO-rs	8.82	10836.7								region	LAC	TIG-rv	4.255	14524.6
	region	OSA	COO-rs	8.82	10837.2								region	LAC	TIG-rv	4.255	14580.6
	region	OCN	COO-rs	8.82	10837.2								region	NAF	COG-rv	4.27	14580.6
	region	OCN	COO-rs	8.82	10838.3								region	NAF	COG-rv	4.27	14621.7
	region	PAS	COO-rs	8.82	10838.3								region	USA	SHG-rv	4.41	14621.7
	region	PAS	COO-rs	8.82	10840.5								region	USA	SHG-rv	4.41	14994.3
	region	LAC	COO-rs	8.82	10840.5								region	CAN	SHG-rv	4.41	14994.3
	region	LAC	COO-rs	8.82	10863.5								region	CAN	SHG-rv	4.41	15031.5
	region	ARC	COO-rs	8.82	10863.5								region	WEU	SHG-rv	4.41	15031.5
	region	ARC	COO-rs	8.82	10935.5								region	WEU	SHG-rv	4.41	15076.3
	region	FSU	COO-rs	9.565	10935.5								region	EEU	SHG-rv	4.41	15076.3
	region	FSU	COO-rs	9.565	11011.1								region	EEU	SHG-rv	4.41	15121.1
	region	NAF	COO-rv	9.72	11011.1								region	EAF	SHG-rv	4.41	15121.1
	region	NAF	COO-rv	9.72	11014.3								region	EAF	SHG-rv	4.41	15136.1
	region	NAF	COO-rs	9.72	11014.3								region	WCA	SHG-rv	4.41	15136.1
	region	NAF	COO-rs	9.72	11054.4								region	WCA	SHG-rv	4.41	15195.7
	region	USA	COO-rs	9.8973	11054.4								region	SAF	SHG-rv	4.41	15195.7
	region	USA	COO-rs	9.8973	11083.4								region	SAF	SHG-rv	4.41	15210.7
	region	CAN	COO-rs	9.8973	11083.4								region	CHN	SHG-rv	4.41	15210.7
	region	CAN	COO-rs	9.8973	11107.4								region	CHN	SHG-rv	4.41	15225.7
	region	WEU	COO-rs	9.8973	11107.4								region	OEA	SHG-rv	4.41	15225.7
	region	WEU	COO-rs	9.8973	11132.8								region	OEA	SHG-rv	4.41	15240.7
	region	EEU	COO-rs	9.8973	11132.8								region	IND	SHG-rv	4.41	15240.7
	region	EEU	COO-rs	9.8973	11135.6								region	IND	SHG-rv	4.41	15255.7
	region	EAF	COO-rs	9.8973	11135.6								region	OSA	SHG-rv	4.41	15255.7
	region	EAF	COO-rs	9.8973	11136.1								region	OSA	SHG-rv	4.41	15300.5
	region	WCA	COO-rs	9.8973	11136.1								region	OCN	SHG-rv	4.41	15300.5
	region	WCA	COO-rs	9.8973	11141.3								region	OCN	SHG-rv	4.41	15330.3
	region	SAF	COO-rs	9.8973	11141.3								region	PAS	SHG-rv	4.41	15330.3
	region	SAF	COO-rs	9.8973	11143.6								region	PAS	SHG-rv	4.41	15345.3
	region	CHN	COO-rs	9.8973	11143.6								region	LAC	SHG-rv	4.41	15345.3
	region	CHN	COO-rs	9.8973	11161.8								region	LAC	SHG-rv	4.41	15375.1
	region	OEA	COO-rs	9.8973	11161.8								region	FSU	COG-rs	4.445	15375.1
	region	OEA	COO-rs	9.8973	11167.7								region	FSU	COG-rs	4.445	15610.6
	region	IND	COO-rs	9.8973	11167.7								region	MEE	COG-rs	4.445	15610.6
	region	IND	COO-rs	9.8973	11168.4								region	MEE	COG-rs	4.445	15662.2
	region	OSA	COO-rs	9.8973	11168.4								region	FSU	CMG-rv	4.5	15662.2
	region	OSA	COO-rs	9.8973	11169								region	FSU	CMG-rv	4.5	15736.7
	region	OCN	COO-rs	9.8973	11169								region	NAF	CMG-rv	4.5	15736.7
	region	OCN	COO-rs	9.8973	11170								region	NAF	CMG-rv	4.5	15751.6
	region	PAS	COO-rs	9.8973	11170								region	MEE	CMG-rv	4.5	15751.6
	region	PAS	COO-rs	9.8973	11172.2								region	MEE	CMG-rv	4.5	15759.1
	region	LAC	COO-rs	9.8973	11172.2								region	USA	DEG-rv	4.5	15759.1
	region	LAC	COO-rs	9.8973	11195.2								region	USA	DEG-rv	4.5	15908.1
	region	ARC	COO-rs	9.8973	11195.2								region	CAN	DEG-rv	4.5	15908.1
	region	ARC	COO-rs	9.8973	11267.2								region	CAN	DEG-rv	4.5	15945.3
	region	USA	EHO-rv	10.4174	11267.2								region	WEU	DEG-rv	4.5	15945.3
	region	USA	EHO-rv	10.4174	11278.2								region	WEU	DEG-rv	4.5	15967.7
	region	CAN	EHO-rv	10.4174	11278.2								region	EEU	DEG-rv	4.5	15967.7
	region	CAN	EHO-rv	10.4174	11278.2								region	EEU	DEG-rv	4.5	15990.1
	region	WEU	EHO-rv	10.4174	11278.2								region	EAF	DEG-rv	4.5	15990.1
	region	WEU	EHO-rv	10.4174	11278.4								region	EAF	DEG-rv	4.5	16012.5
	region	EEU	EHO-rv	10.4174	11278.4								region	WCA	DEG-rv	4.5	16012.5
	region	EEU	EHO-rv	10.4174	11278.5								region	WCA	DEG-rv	4.5	16064.7
	region	CHN	EHO-rv	10.4174	11278.5								region	SAF	DEG-rv	4.5	16064.7
	region	CHN	EHO-rv	10.4174	11279.1								region	SAF	DEG-rv	4.5	16079.7
	region	LAC	EHO-rv	10.4174	11279.1								region	CHN	DEG-rv	4.5	16079.7
	region	LAC	EHO-rv	10.4174	11310.2								region	CHN	DEG-rv	4.5	16094.7
	region	CAN	TAO-rv	10.4174	11310.2								region	IND	DEG-rv	4.5	16094.7
	region	CAN	TAO-rv	10.4174	11499.8								region	IND	DEG-rv	4.5	16109.7
	region	WEU	TAO-rv	10.4174	11499.8								region	OSA	DEG-rv	4.5	16109.7
	region	WEU	TAO-rv	10.4174	11500.1								region	OSA	DEG-rv	4.5	16146.9
	region	EAF	TAO-rv	10.4174	11500.1								region	OCN	DEG-rv	4.5	16146.9
	region	EAF	TAO-rv	10.4174	11500.5								region	OCN	DEG-rv	4.5	16161.9
	region	WCA	TAO-rv	10.4174	11500.5								region	PAS	DEG-rv	4.5	16161.9
	region	WCA	TAO-rv	10.4174	11501								region	PAS	DEG-rv	4.5	16176.9
	region	SAF	TAO-rv	10.4174	11501								region	LAC	DEG-rv	4.5	16176.9
	region	SAF	TAO-rv	10.4174	11501.6								region	LAC	DEG-rv	4.5	16221.7
	region	PAS	TAO-rv	10.4174	11501.6								region	NAF	COG-rv	4.7	16221.7
	region	PAS	TAO-rv	10.4174	11502								region	NAF	COG-rv	4.7	16262.8
	region	USA	SHO-rv	10.4174	11502								region	FSU	SHG-rv	4.71	16262.8
	region	USA	SHO-rv	10.4174	11727.9								region	FSU	SHG-rv	4.71	16343.3
	region	WEU	SHO-rv	10.4174	11727.9								region	NAF	SHG-rv	4.71	16343.3
	region	WEU	SHO-rv	10.4174	11729.1								region	NAF	SHG-rv	4.71	16348.6
	region	EEU	SHO-rv	10.4174	11729.1								region	MEE	SHG-rv	4.71	16348.6
	region	EEU	SHO-rv	10.4174	11729.1								region	MEE	SHG-rv	4.71	16354
	region	CHN	SHO-rv	10.4174	11729.1								region	EAF	COG-rv	4.9014	16354
	region	CHN	SHO-rv	10.4174	11730.2								region	EAF	COG-rv	4.9014	16354
	region	OCN	SHO-rv	10.4174	11730.2								region	USA	COG-rs	4.9014	16354
	region	OCN	SHO-rv	10.4174	11733.4								region	USA	COG-rs	4.9014	16415.4
	region	PAS	SHO-rv	10.4174	11733.4								region	CAN	COG-rs	4.9014	16415.4
	region	PAS	SHO-rv	10.4174	11734.9								region	CAN	COG-rs	4.9014	16445.4
	region	LAC	SHO-rv	10.4174	11734.9								region	WEU	COG-rs	4.9014	16445.4
	region	LAC	SHO-rv	10.4174	11735.6								region	WEU	COG-rs	4.9014	16465
	region	FSU	EHO-rv	10.5263	11735.6								region	EEU	COG-rs	4.9014	16465
	region	FSU	EHO-rv	10.5263	11735.6								region	EEU	COG-rs	4.9014	16467.6
	region	NAF	EHO-rv	10.5263	11735.6								region	EAF	COG-rs	4.9014	16467.6
	region	NAF	EHO-rv	10.5263	11735.7								region	EAF	COG-rs	4.9014	16471.4
	region	MEE	EHO-rv	10.5263	11735.7								region	WCA	COG-rs	4.9014	16471.4
	region	MEE	EHO-rv	10.5263	11735.7								region	WCA	COG-rs	4.9014	16478.3
	region	FSU	TAO-rv	10.5263	11735.7								region	SAF	COG-rs	4.9014	16478.3
	region	FSU	TAO-rv	10.5263	11787.5								region	SAF	COG-rs	4.9014	16481.6
	region	FSU	SHO-rv	10.5263	11787.5								region	CHN	COG-rs	4.9014	16481.6
	region	FSU	SHO-rv	10.5263	11788.2								region	CHN	COG-rs	4.9014	16501
	region	NAF	SHO-rv	10.5263	11788.2								region	OEA	COG-rs	4.9014	16501
	region	NAF	SHO-rv	10.5263	11788.6								region	OEA	COG-rs	4.9014	16504.1
	region	MEE	SHO-rv	10.5263	11788.6								region	IND	COG-rs	4.9014	16504.1
	region	MEE	SHO-rv	10.5263	11791.2								region	IND	COG-rs	4.9014	16507.7
	region	NAF	COO-rv	10.79	11791.2								region	OSA	COG-rs	4.9014	16507.7
	region	NAF	COO-rv	10.79	11794.4								region	OSA	COG-rs	4.9014	16515.1
	region	NAF	COO-rs	10.79	11794.4								region	OCN	COG-rs	4.9014	16515.1
	region	NAF	COO-rs	10.79	11834.4								region	OCN	COG-rs	4.9014	16519.2
	region	USA	COO-rs	10.9746	11834.4								region	PAS	COG-rs	4.9014	16519.2
	region	USA	COO-rs	10.9746	11863.5								region	PAS	COG-rs	4.9014	16553.6
	region	CAN	COO-rs	10.9746	11863.5								region	LAC	COG-rs	4.9014	16553.6
	region	CAN	COO-rs	10.9746	11887.5								region	LAC	COG-rs	4.9014	16590.7
	region	WEU	COO-rs	10.9746	11887.5								region	ARC	COG-rs	4.9014	16590.7
	region	WEU	COO-rs	10.9746	11912.9								region	ARC	COG-rs	4.9014	16645.4
	region	EEU	COO-rs	10.9746	11912.9								region	FSU	TIG-rv	4.995	16645.4
	region	EEU	COO-rs	10.9746	11915.7								region	FSU	TIG-rv	4.995	16827.9
	region	EAF	COO-rs	10.9746	11915.7								region	NAF	TIG-rv	4.995	16827.9
	region	EAF	COO-rs	10.9746	11916.1								region	NAF	TIG-rv	4.995	16880
	region	WCA	COO-rs	10.9746	11916.1								region	MEE	TIG-rv	4.995	16880
	region	WCA	COO-rs	10.9746	11921.3								region	MEE	TIG-rv	4.995	16977.9
	region	SAF	COO-rs	10.9746	11921.3								region	FSU	COG-rs	5	16977.9
	region	SAF	COO-rs	10.9746	11923.7								region	FSU	COG-rs	5	17134.8
	region	CHN	COO-rs	10.9746	11923.7								region	NAF	COG-rv	5.13	17134.8
	region	CHN	COO-rs	10.9746	11941.8								region	NAF	COG-rv	5.13	17175.9
	region	OEA	COO-rs	10.9746	11941.8								region	USA	CMG-rv	5.221	17175.9
	region	OEA	COO-rs	10.9746	11947.8								region	USA	CMG-rv	5.221	17455.2
	region	IND	COO-rs	10.9746	11947.8								region	CAN	CMG-rv	5.221	17455.2
	region	IND	COO-rs	10.9746	11948.5								region	CAN	CMG-rv	5.221	17533.5
	region	OSA	COO-rs	10.9746	11948.5								region	WEU	CMG-rv	5.221	17533.5
	region	OSA	COO-rs	10.9746	11949								region	WEU	CMG-rv	5.221	17611.8
	region	OCN	COO-rs	10.9746	11949								region	EEU	CMG-rv	5.221	17611.8
	region	OCN	COO-rs	10.9746	11950								region	EEU	CMG-rv	5.221	17634.3
	region	PAS	COO-rs	10.9746	11950								region	EAF	CMG-rv	5.221	17634.3
	region	PAS	COO-rs	10.9746	11952.3								region	EAF	CMG-rv	5.221	17656.8
	region	LAC	COO-rs	10.9746	11952.3								region	WCA	CMG-rv	5.221	17656.8
	region	LAC	COO-rs	10.9746	11975.3								region	WCA	CMG-rv	5.221	17679.3
	region	ARC	COO-rs	10.9746	11975.3								region	SAF	CMG-rv	5.221	17679.3
	region	ARC	COO-rs	10.9746	12047.3								region	SAF	CMG-rv	5.221	17701.8
	region	NAF	COO-rv	11.86	12047.3								region	CHN	CMG-rv	5.221	17701.8
	region	NAF	COO-rv	11.86	12050.5								region	CHN	CMG-rv	5.221	17869.5
	region	NAF	COO-rs	11.86	12050.5								region	IND	CMG-rv	5.221	17869.5
	region	NAF	COO-rs	11.86	12090.5								region	IND	CMG-rv	5.221	17947.8
	region	USA	COO-rs	12.0519	12090.5								region	OSA	CMG-rv	5.221	17947.8
	region	USA	COO-rs	12.0519	12119.6								region	OSA	CMG-rv	5.221	17958.9
	region	CAN	COO-rs	12.0519	12119.6								region	JPN	CMG-rv	5.221	17958.9
	region	CAN	COO-rs	12.0519	12143.6								region	JPN	CMG-rv	5.221	17970
	region	WEU	COO-rs	12.0519	12143.6								region	OCN	CMG-rv	5.221	17970
	region	WEU	COO-rs	12.0519	12168.9								region	OCN	CMG-rv	5.221	18025.8
	region	EEU	COO-rs	12.0519	12168.9								region	PAS	CMG-rv	5.221	18025.8
	region	EEU	COO-rs	12.0519	12171.8								region	PAS	CMG-rv	5.221	18036.9
	region	EAF	COO-rs	12.0519	12171.8								region	LAC	CMG-rv	5.221	18036.9
	region	EAF	COO-rs	12.0519	12172.2								region	LAC	CMG-rv	5.221	18104.1
	region	WCA	COO-rs	12.0519	12172.2								region	USA	TIG-rv	5.221	18104.1
	region	WCA	COO-rs	12.0519	12177.4								region	USA	TIG-rv	5.221	18439.5
	region	SAF	COO-rs	12.0519	12177.4								region	CAN	TIG-rv	5.221	18439.5
	region	SAF	COO-rs	12.0519	12179.7								region	CAN	TIG-rv	5.221	18607.2
	region	CHN	COO-rs	12.0519	12179.7								region	WEU	TIG-rv	5.221	18607.2
	region	CHN	COO-rs	12.0519	12197.9								region	WEU	TIG-rv	5.221	18651.9
	region	OEA	COO-rs	12.0519	12197.9								region	EEU	TIG-rv	5.221	18651.9
	region	OEA	COO-rs	12.0519	12203.9								region	EEU	TIG-rv	5.221	18696.6
	region	IND	COO-rs	12.0519	12203.9								region	EAF	TIG-rv	5.221	18696.6
	region	IND	COO-rs	12.0519	12204.6								region	EAF	TIG-rv	5.221	18741.3
	region	OSA	COO-rs	12.0519	12204.6								region	WCA	TIG-rv	5.221	18741.3
	region	OSA	COO-rs	12.0519	12205.1								region	WCA	TIG-rv	5.221	18875.4
	region	OCN	COO-rs	12.0519	12205.1								region	SAF	TIG-rv	5.221	18875.4
	region	OCN	COO-rs	12.0519	12206.1								region	SAF	TIG-rv	5.221	18909
	region	PAS	COO-rs	12.0519	12206.1								region	CHN	TIG-rv	5.221	18909
	region	PAS	COO-rs	12.0519	12208.3								region	CHN	TIG-rv	5.221	18942.6
	region	LAC	COO-rs	12.0519	12208.3								region	OEA	TIG-rv	5.221	18942.6
	region	LAC	COO-rs	12.0519	12231.4								region	OEA	TIG-rv	5.221	18976.2
	region	ARC	COO-rs	12.0519	12231.4								region	IND	TIG-rv	5.221	18976.2
	region	ARC	COO-rs	12.0519	12303.3								region	IND	TIG-rv	5.221	19009.8
	region	USA	EHO-rv	12.1542	12303.3								region	OSA	TIG-rv	5.221	19009.8
	region	USA	EHO-rv	12.1542	12312.3								region	OSA	TIG-rv	5.221	19077
	region	CAN	EHO-rv	12.1542	12312.3								region	OCN	TIG-rv	5.221	19077
	region	CAN	EHO-rv	12.1542	12312.3								region	OCN	TIG-rv	5.221	19121.7
	region	WEU	EHO-rv	12.1542	12312.3								region	PAS	TIG-rv	5.221	19121.7
	region	WEU	EHO-rv	12.1542	12312.3								region	PAS	TIG-rv	5.221	19188.9
	region	EEU	EHO-rv	12.1542	12312.3								region	LAC	TIG-rv	5.221	19188.9
	region	EEU	EHO-rv	12.1542	12312.3								region	LAC	TIG-rv	5.221	19256.1
	region	CHN	EHO-rv	12.1542	12312.3								region	USA	SHG-rv	5.439	19256.1
	region	CHN	EHO-rv	12.1542	12313.4								region	USA	SHG-rv	5.439	19721.9
	region	LAC	EHO-rv	12.1542	12313.4								region	CAN	SHG-rv	5.439	19721.9
	region	LAC	EHO-rv	12.1542	12358.4								region	CAN	SHG-rv	5.439	19768.4
	region	CAN	TAO-rv	12.1542	12358.4								region	WEU	SHG-rv	5.439	19768.4
	region	CAN	TAO-rv	12.1542	12512.4								region	WEU	SHG-rv	5.439	19824.4
	region	WEU	TAO-rv	12.1542	12512.4								region	EEU	SHG-rv	5.439	19824.4
	region	WEU	TAO-rv	12.1542	12512.5								region	EEU	SHG-rv	5.439	19880.4
	region	WCA	TAO-rv	12.1542	12512.5								region	EAF	SHG-rv	5.439	19880.4
	region	WCA	TAO-rv	12.1542	12513.3								region	EAF	SHG-rv	5.439	19899.1
	region	SAF	TAO-rv	12.1542	12513.3								region	WCA	SHG-rv	5.439	19899.1
	region	SAF	TAO-rv	12.1542	12513.9								region	WCA	SHG-rv	5.439	19973.6
	region	PAS	TAO-rv	12.1542	12513.9								region	SAF	SHG-rv	5.439	19973.6
	region	PAS	TAO-rv	12.1542	12514.2								region	SAF	SHG-rv	5.439	19992.4
	region	USA	SHO-rv	12.1542	12514.2								region	CHN	SHG-rv	5.439	19992.4
	region	USA	SHO-rv	12.1542	12697.7								region	CHN	SHG-rv	5.439	20011.1
	region	WEU	SHO-rv	12.1542	12697.7								region	OEA	SHG-rv	5.439	20011.1
	region	WEU	SHO-rv	12.1542	12698.1								region	OEA	SHG-rv	5.439	20029.9
	region	EEU	SHO-rv	12.1542	12698.1								region	IND	SHG-rv	5.439	20029.9
	region	EEU	SHO-rv	12.1542	12698.1								region	IND	SHG-rv	5.439	20048.6
	region	CHN	SHO-rv	12.1542	12698.1								region	OSA	SHG-rv	5.439	20048.6
	region	CHN	SHO-rv	12.1542	12699.7								region	OSA	SHG-rv	5.439	20104.6
	region	OCN	SHO-rv	12.1542	12699.7								region	OCN	SHG-rv	5.439	20104.6
	region	OCN	SHO-rv	12.1542	12701.9								region	OCN	SHG-rv	5.439	20141.9
	region	PAS	SHO-rv	12.1542	12701.9								region	PAS	SHG-rv	5.439	20141.9
	region	PAS	SHO-rv	12.1542	12702.9								region	PAS	SHG-rv	5.439	20160.6
	region	LAC	SHO-rv	12.1542	12702.9								region	LAC	SHG-rv	5.439	20160.6
	region	LAC	SHO-rv	12.1542	12703.8								region	LAC	SHG-rv	5.439	20197.9
	region	NAF	COO-rv	12.93	12703.8								region	FSU	COG-rs	5.49	20197.9
	region	NAF	COO-rv	12.93	12707								region	FSU	COG-rs	5.49	20354.9
	region	NAF	COO-rs	12.93	12707								region	FSU	CMG-rv	5.55	20354.9
	region	NAF	COO-rs	12.93	12747.1								region	FSU	CMG-rv	5.55	20448
	region	FSU	EHO-rv	13.1579	12747.1								region	NAF	CMG-rv	5.55	20448
	region	FSU	EHO-rv	13.1579	12747.2								region	NAF	CMG-rv	5.55	20466.6
	region	NAF	EHO-rv	13.1579	12747.2								region	MEE	CMG-rv	5.55	20466.6
	region	NAF	EHO-rv	13.1579	12747.2								region	MEE	CMG-rv	5.55	20476
	region	MEE	EHO-rv	13.1579	12747.2								region	USA	DEG-rv	5.55	20476
	region	MEE	EHO-rv	13.1579	12747.2								region	USA	DEG-rv	5.55	20662.2
	region	FSU	TAO-rv	13.1579	12747.2								region	CAN	DEG-rv	5.55	20662.2
	region	FSU	TAO-rv	13.1579	12825								region	CAN	DEG-rv	5.55	20708.7
	region	FSU	SHO-rv	13.1579	12825								region	WEU	DEG-rv	5.55	20708.7
	region	FSU	SHO-rv	13.1579	12826								region	WEU	DEG-rv	5.55	20736.7
	region	NAF	SHO-rv	13.1579	12826								region	EEU	DEG-rv	5.55	20736.7
	region	NAF	SHO-rv	13.1579	12826.6								region	EEU	DEG-rv	5.55	20764.7
	region	MEE	SHO-rv	13.1579	12826.6								region	EAF	DEG-rv	5.55	20764.7
	region	MEE	SHO-rv	13.1579	12827.2								region	EAF	DEG-rv	5.55	20792.7
	region	USA	EHO-rv	13.8911	12827.2								region	WCA	DEG-rv	5.55	20792.7
	region	USA	EHO-rv	13.8911	12840.6								region	WCA	DEG-rv	5.55	20858
	region	CAN	EHO-rv	13.8911	12840.6								region	SAF	DEG-rv	5.55	20858
	region	CAN	EHO-rv	13.8911	12840.6								region	SAF	DEG-rv	5.55	20876.7
	region	WEU	EHO-rv	13.8911	12840.6								region	CHN	DEG-rv	5.55	20876.7
	region	WEU	EHO-rv	13.8911	12840.8								region	CHN	DEG-rv	5.55	20895.5
	region	EEU	EHO-rv	13.8911	12840.8								region	IND	DEG-rv	5.55	20895.5
	region	EEU	EHO-rv	13.8911	12840.9								region	IND	DEG-rv	5.55	20914.2
	region	CHN	EHO-rv	13.8911	12840.9								region	OSA	DEG-rv	5.55	20914.2
	region	CHN	EHO-rv	13.8911	12841.9								region	OSA	DEG-rv	5.55	20960.7
	region	LAC	EHO-rv	13.8911	12841.9								region	OCN	DEG-rv	5.55	20960.7
	region	LAC	EHO-rv	13.8911	12913.9								region	OCN	DEG-rv	5.55	20979.5
	region	CAN	TAO-rv	13.8911	12913.9								region	PAS	DEG-rv	5.55	20979.5
	region	CAN	TAO-rv	13.8911	13144.9								region	PAS	DEG-rv	5.55	20998.2
	region	WEU	TAO-rv	13.8911	13144.9								region	LAC	DEG-rv	5.55	20998.2
	region	WEU	TAO-rv	13.8911	13145.2								region	LAC	DEG-rv	5.55	21054.2
	region	EAF	TAO-rv	13.8911	13145.2								region	NAF	COG-rv	5.56	21054.2
	region	EAF	TAO-rv	13.8911	13145.4								region	NAF	COG-rv	5.56	21061.4
	region	WCA	TAO-rv	13.8911	13145.4								region	NAF	COG-rs	5.56	21061.4
	region	WCA	TAO-rv	13.8911	13146.2								region	NAF	COG-rs	5.56	21100.8
	region	SAF	TAO-rv	13.8911	13146.2								region	EAF	COG-rv	5.6007	21100.8
	region	SAF	TAO-rv	13.8911	13146.6								region	EAF	COG-rv	5.6007	21100.8
	region	PAS	TAO-rv	13.8911	13146.6								region	USA	COG-rs	5.6007	21100.8
	region	PAS	TAO-rv	13.8911	13147.4								region	USA	COG-rs	5.6007	21162.1
	region	USA	SHO-rv	13.8911	13147.4								region	CAN	COG-rs	5.6007	21162.1
	region	USA	SHO-rv	13.8911	13422.6								region	CAN	COG-rs	5.6007	21192.2
	region	WEU	SHO-rv	13.8911	13422.6								region	WEU	COG-rs	5.6007	21192.2
	region	WEU	SHO-rv	13.8911	13423.5								region	WEU	COG-rs	5.6007	21211.7
	region	EEU	SHO-rv	13.8911	13423.5								region	EEU	COG-rs	5.6007	21211.7
	region	EEU	SHO-rv	13.8911	13423.6								region	EEU	COG-rs	5.6007	21214.3
	region	CHN	SHO-rv	13.8911	13423.6								region	EAF	COG-rs	5.6007	21214.3
	region	CHN	SHO-rv	13.8911	13425.2								region	EAF	COG-rs	5.6007	21218.2
	region	OCN	SHO-rv	13.8911	13425.2								region	WCA	COG-rs	5.6007	21218.2
	region	OCN	SHO-rv	13.8911	13431								region	WCA	COG-rs	5.6007	21225
	region	PAS	SHO-rv	13.8911	13431								region	SAF	COG-rs	5.6007	21225
	region	PAS	SHO-rv	13.8911	13433.7								region	SAF	COG-rs	5.6007	21228.3
	region	LAC	SHO-rv	13.8911	13433.7								region	CHN	COG-rs	5.6007	21228.3
	region	LAC	SHO-rv	13.8911	13435.2								region	CHN	COG-rs	5.6007	21247.7
	region	NAF	COO-rs	14	13435.2								region	OEA	COG-rs	5.6007	21247.7
	region	NAF	COO-rs	14	13441.2								region	OEA	COG-rs	5.6007	21250.9
	region	USA	EHO-rv	15.6279	13441.2								region	IND	COG-rs	5.6007	21250.9
	region	USA	EHO-rv	15.6279	13463.5								region	IND	COG-rs	5.6007	21254.5
	region	CAN	EHO-rv	15.6279	13463.5								region	OSA	COG-rs	5.6007	21254.5
	region	CAN	EHO-rv	15.6279	13463.5								region	OSA	COG-rs	5.6007	21261.9
	region	WEU	EHO-rv	15.6279	13463.5								region	OCN	COG-rs	5.6007	21261.9
	region	WEU	EHO-rv	15.6279	13464								region	OCN	COG-rs	5.6007	21266
	region	EEU	EHO-rv	15.6279	13464								region	PAS	COG-rs	5.6007	21266
	region	EEU	EHO-rv	15.6279	13464.1								region	PAS	COG-rs	5.6007	21300.3
	region	CHN	EHO-rv	15.6279	13464.1								region	LAC	COG-rs	5.6007	21300.3
	region	CHN	EHO-rv	15.6279	13465.4								region	LAC	COG-rs	5.6007	21337.5
	region	LAC	EHO-rv	15.6279	13465.4								region	ARC	COG-rs	5.6007	21337.5
	region	LAC	EHO-rv	15.6279	13528.5								region	ARC	COG-rs	5.6007	21392.1
	region	CAN	TAO-rv	15.6279	13528.5								region	FSU	SHG-rv	5.809	21392.1
	region	CAN	TAO-rv	15.6279	13913.5								region	FSU	SHG-rv	5.809	21492.7
	region	WEU	TAO-rv	15.6279	13913.5								region	NAF	SHG-rv	5.809	21492.7
	region	WEU	TAO-rv	15.6279	13914.1								region	NAF	SHG-rv	5.809	21499.4
	region	EAF	TAO-rv	15.6279	13914.1								region	MEE	SHG-rv	5.809	21499.4
	region	EAF	TAO-rv	15.6279	13914.9								region	MEE	SHG-rv	5.809	21506.1
	region	WCA	TAO-rv	15.6279	13914.9								region	FSU	COG-rs	5.98	21506.1
	region	WCA	TAO-rv	15.6279	13915.9								region	FSU	COG-rs	5.98	21663.1
	region	SAF	TAO-rv	15.6279	13915.9								region	FSU	DEG-rv	6	21663.1
	region	SAF	TAO-rv	15.6279	13917								region	FSU	DEG-rv	6	21774.9
	region	PAS	TAO-rv	15.6279	13917								region	NAF	DEG-rv	6	21774.9
	region	PAS	TAO-rv	15.6279	13917.9								region	NAF	DEG-rv	6	21812.2
	region	USA	SHO-rv	15.6279	13917.9								region	MEE	DEG-rv	6	21812.2
	region	USA	SHO-rv	15.6279	14376.5								region	MEE	DEG-rv	6	21838.3
	region	WEU	SHO-rv	15.6279	14376.5								region	FSU	TIG-rv	6.129	21838.3
	region	WEU	SHO-rv	15.6279	14379								region	FSU	TIG-rv	6.129	22057.3
	region	EEU	SHO-rv	15.6279	14379								region	NAF	TIG-rv	6.129	22057.3
	region	EEU	SHO-rv	15.6279	14379								region	NAF	TIG-rv	6.129	22119.9
	region	CHN	SHO-rv	15.6279	14379								region	MEE	TIG-rv	6.129	22119.9
	region	CHN	SHO-rv	15.6279	14381.2								region	MEE	TIG-rv	6.129	22237.3
	region	OCN	SHO-rv	15.6279	14381.2								region	USA	COG-rs	6.3	22237.3
	region	OCN	SHO-rv	15.6279	14387.7								region	USA	COG-rs	6.3	22261.8
	region	PAS	SHO-rv	15.6279	14387.7								region	CAN	COG-rs	6.3	22261.8
	region	PAS	SHO-rv	15.6279	14390.8								region	CAN	COG-rs	6.3	22291.8
	region	LAC	SHO-rv	15.6279	14390.8								region	WEU	COG-rs	6.3	22291.8
	region	LAC	SHO-rv	15.6279	14392.1								region	WEU	COG-rs	6.3	22311.4
	region	NAF	COO-rs	15.71	14392.1								region	EEU	COG-rs	6.3	22311.4
	region	NAF	COO-rs	15.71	14398.1								region	EEU	COG-rs	6.3	22313.9
	region	FSU	EHO-rv	15.7895	14398.1								region	EAF	COG-rs	6.3	22313.9
	region	FSU	EHO-rv	15.7895	14398.2								region	EAF	COG-rs	6.3	22315.5
	region	NAF	EHO-rv	15.7895	14398.2								region	SAF	COG-rs	6.3	22315.5
	region	NAF	EHO-rv	15.7895	14398.2								region	SAF	COG-rs	6.3	22316.7
	region	MEE	EHO-rv	15.7895	14398.2								region	CHN	COG-rs	6.3	22316.7
	region	MEE	EHO-rv	15.7895	14398.2								region	CHN	COG-rs	6.3	22336
	region	FSU	TAO-rv	15.7895	14398.2								region	OEA	COG-rs	6.3	22336
	region	FSU	TAO-rv	15.7895	14486								region	OEA	COG-rs	6.3	22339.2
	region	FSU	SHO-rv	15.7895	14486								region	IND	COG-rs	6.3	22339.2
	region	FSU	SHO-rv	15.7895	14487.2								region	IND	COG-rs	6.3	22341.3
	region	NAF	SHO-rv	15.7895	14487.2								region	OSA	COG-rs	6.3	22341.3
	region	NAF	SHO-rv	15.7895	14488								region	OSA	COG-rs	6.3	22344.3
	region	MEE	SHO-rv	15.7895	14488								region	PAS	COG-rs	6.3	22344.3
	region	MEE	SHO-rv	15.7895	14507.5								region	PAS	COG-rs	6.3	22351.2
	region	USA	EHO-rs	17.3648	14507.5								region	LAC	COG-rs	6.3	22351.2
	region	USA	EHO-rs	17.3648	14597.5								region	LAC	COG-rs	6.3	22373.5
	region	CAN	EHO-rs	17.3648	14597.5								region	ARC	COG-rs	6.3	22373.5
	region	CAN	EHO-rs	17.3648	14766.8								region	ARC	COG-rs	6.3	22537.4
	region	WEU	EHO-rs	17.3648	14766.8								region	USA	CMG-rv	6.3802	22537.4
	region	WEU	EHO-rs	17.3648	14767.2								region	USA	CMG-rv	6.3802	22770.1
	region	EEU	EHO-rs	17.3648	14767.2								region	CAN	CMG-rv	6.3802	22770.1
	region	EEU	EHO-rs	17.3648	14767.2								region	CAN	CMG-rv	6.3802	22835.4
	region	CHN	EHO-rs	17.3648	14767.2								region	WEU	CMG-rv	6.3802	22835.4
	region	CHN	EHO-rs	17.3648	14771.8								region	WEU	CMG-rv	6.3802	22900.6
	region	OEA	EHO-rs	17.3648	14771.8								region	EEU	CMG-rv	6.3802	22900.6
	region	OEA	EHO-rs	17.3648	14773								region	EEU	CMG-rv	6.3802	22919.4
	region	IND	EHO-rs	17.3648	14773								region	EAF	CMG-rv	6.3802	22919.4
	region	IND	EHO-rs	17.3648	14773.5								region	EAF	CMG-rv	6.3802	22938.1
	region	LAC	EHO-rs	17.3648	14773.5								region	WCA	CMG-rv	6.3802	22938.1
	region	LAC	EHO-rs	17.3648	14773.6								region	WCA	CMG-rv	6.3802	22956.9
	region	USA	TAO-rs	17.3648	14773.6								region	SAF	CMG-rv	6.3802	22956.9
	region	USA	TAO-rs	17.3648	14777.3								region	SAF	CMG-rv	6.3802	22975.6
	region	CAN	TAO-rs	17.3648	14777.3								region	CHN	CMG-rv	6.3802	22975.6
	region	CAN	TAO-rs	17.3648	15291								region	CHN	CMG-rv	6.3802	23115.4
	region	WEU	TAO-rs	17.3648	15291								region	IND	CMG-rv	6.3802	23115.4
	region	WEU	TAO-rs	17.3648	15291.1								region	IND	CMG-rv	6.3802	23180.6
	region	EEU	TAO-rs	17.3648	15291.1								region	OSA	CMG-rv	6.3802	23180.6
	region	EEU	TAO-rs	17.3648	15291.1								region	OSA	CMG-rv	6.3802	23189.9
	region	EAF	TAO-rs	17.3648	15291.1								region	JPN	CMG-rv	6.3802	23189.9
	region	EAF	TAO-rs	17.3648	15291.1								region	JPN	CMG-rv	6.3802	23199.1
	region	WCA	TAO-rs	17.3648	15291.1								region	OCN	CMG-rv	6.3802	23199.1
	region	WCA	TAO-rs	17.3648	15291.4								region	OCN	CMG-rv	6.3802	23245.6
	region	SAF	TAO-rs	17.3648	15291.4								region	PAS	CMG-rv	6.3802	23245.6
	region	SAF	TAO-rs	17.3648	15291.6								region	PAS	CMG-rv	6.3802	23254.9
	region	CHN	TAO-rs	17.3648	15291.6								region	LAC	CMG-rv	6.3802	23254.9
	region	CHN	TAO-rs	17.3648	15291.6								region	LAC	CMG-rv	6.3802	23310.9
	region	PAS	TAO-rs	17.3648	15291.6								region	USA	TIG-rv	6.3802	23310.9
	region	PAS	TAO-rs	17.3648	15291.9								region	USA	TIG-rv	6.3802	23590.4
	region	LAC	TAO-rs	17.3648	15291.9								region	CAN	TIG-rv	6.3802	23590.4
	region	LAC	TAO-rs	17.3648	15566.9								region	CAN	TIG-rv	6.3802	23730.1
	region	USA	SHO-rs	17.3648	15566.9								region	WEU	TIG-rv	6.3802	23730.1
	region	USA	SHO-rs	17.3648	15816.9								region	WEU	TIG-rv	6.3802	23767.4
	region	CAN	SHO-rs	17.3648	15816.9								region	EEU	TIG-rv	6.3802	23767.4
	region	CAN	SHO-rs	17.3648	15823								region	EEU	TIG-rv	6.3802	23804.6
	region	WEU	SHO-rs	17.3648	15823								region	EAF	TIG-rv	6.3802	23804.6
	region	WEU	SHO-rs	17.3648	15830.5								region	EAF	TIG-rv	6.3802	23841.9
	region	EEU	SHO-rs	17.3648	15830.5								region	WCA	TIG-rv	6.3802	23841.9
	region	EEU	SHO-rs	17.3648	15830.5								region	WCA	TIG-rv	6.3802	23953.6
	region	EAF	SHO-rs	17.3648	15830.5								region	SAF	TIG-rv	6.3802	23953.6
	region	EAF	SHO-rs	17.3648	15830.5								region	SAF	TIG-rv	6.3802	23981.6
	region	WCA	SHO-rs	17.3648	15830.5								region	CHN	TIG-rv	6.3802	23981.6
	region	WCA	SHO-rs	17.3648	15846.4								region	CHN	TIG-rv	6.3802	24009.6
	region	SAF	SHO-rs	17.3648	15846.4								region	OEA	TIG-rv	6.3802	24009.6
	region	SAF	SHO-rs	17.3648	15846.4								region	OEA	TIG-rv	6.3802	24037.6
	region	CHN	SHO-rs	17.3648	15846.4								region	IND	TIG-rv	6.3802	24037.6
	region	CHN	SHO-rs	17.3648	15848.3								region	IND	TIG-rv	6.3802	24065.6
	region	OEA	SHO-rs	17.3648	15848.3								region	OSA	TIG-rv	6.3802	24065.6
	region	OEA	SHO-rs	17.3648	15848.3								region	OSA	TIG-rv	6.3802	24121.6
	region	OCN	SHO-rs	17.3648	15848.3								region	OCN	TIG-rv	6.3802	24121.6
	region	OCN	SHO-rs	17.3648	15852.1								region	OCN	TIG-rv	6.3802	24158.9
	region	PAS	SHO-rs	17.3648	15852.1								region	PAS	TIG-rv	6.3802	24158.9
	region	PAS	SHO-rs	17.3648	15853.7								region	PAS	TIG-rv	6.3802	24214.9
	region	LAC	SHO-rs	17.3648	15853.7								region	LAC	TIG-rv	6.3802	24214.9
	region	LAC	SHO-rs	17.3648	15873.3								region	LAC	TIG-rv	6.3802	24270.9
	region	NAF	COO-rs	17.42	15873.3								region	FSU	COG-rs	6.47	24270.9
	region	NAF	COO-rs	17.42	15879.3								region	FSU	COG-rs	6.47	24427.8
	region	FSU	EHO-rv	18.4211	15879.3								region	NAF	COG-rv	6.67	24427.8
	region	FSU	EHO-rv	18.4211	15879.4								region	NAF	COG-rv	6.67	24435
	region	NAF	EHO-rv	18.4211	15879.4								region	NAF	COG-rs	6.67	24435
	region	NAF	EHO-rv	18.4211	15879.4								region	NAF	COG-rs	6.67	24474.3
	region	MEE	EHO-rv	18.4211	15879.4								region	USA	SHG-rv	6.6738	24474.3
	region	MEE	EHO-rv	18.4211	15879.4								region	USA	SHG-rv	6.6738	25033.2
	region	FSU	TAO-rv	18.4211	15879.4								region	CAN	SHG-rv	6.6738	25033.2
	region	FSU	TAO-rv	18.4211	15984.7								region	CAN	SHG-rv	6.6738	25089
	region	FSU	SHO-rv	18.4211	15984.7								region	WEU	SHG-rv	6.6738	25089
	region	FSU	SHO-rv	18.4211	15986.1								region	WEU	SHG-rv	6.6738	25156.2
	region	NAF	SHO-rv	18.4211	15986.1								region	EEU	SHG-rv	6.6738	25156.2
	region	NAF	SHO-rv	18.4211	15987								region	EEU	SHG-rv	6.6738	25223.4
	region	MEE	SHO-rv	18.4211	15987								region	EAF	SHG-rv	6.6738	25223.4
	region	MEE	SHO-rv	18.4211	15992.2								region	EAF	SHG-rv	6.6738	25245.9
	region	USA	EHO-rs	19.1016	15992.2								region	WCA	SHG-rv	6.6738	25245.9
	region	USA	EHO-rs	19.1016	16112.2								region	WCA	SHG-rv	6.6738	25335.3
	region	CAN	EHO-rs	19.1016	16112.2								region	SAF	SHG-rv	6.6738	25335.3
	region	CAN	EHO-rs	19.1016	16179.9								region	SAF	SHG-rv	6.6738	25357.8
	region	WEU	EHO-rs	19.1016	16179.9								region	CHN	SHG-rv	6.6738	25357.8
	region	WEU	EHO-rs	19.1016	16180.4								region	CHN	SHG-rv	6.6738	25380.3
	region	EEU	EHO-rs	19.1016	16180.4								region	OEA	SHG-rv	6.6738	25380.3
	region	EEU	EHO-rs	19.1016	16180.4								region	OEA	SHG-rv	6.6738	25402.8
	region	CHN	EHO-rs	19.1016	16180.4								region	IND	SHG-rv	6.6738	25402.8
	region	CHN	EHO-rs	19.1016	16185.8								region	IND	SHG-rv	6.6738	25425.3
	region	OEA	EHO-rs	19.1016	16185.8								region	OSA	SHG-rv	6.6738	25425.3
	region	OEA	EHO-rs	19.1016	16187								region	OSA	SHG-rv	6.6738	25492.5
	region	IND	EHO-rs	19.1016	16187								region	OCN	SHG-rv	6.6738	25492.5
	region	IND	EHO-rs	19.1016	16187.4								region	OCN	SHG-rv	6.6738	25537.2
	region	LAC	EHO-rs	19.1016	16187.4								region	PAS	SHG-rv	6.6738	25537.2
	region	LAC	EHO-rs	19.1016	16187.4								region	PAS	SHG-rv	6.6738	25559.7
	region	USA	TAO-rs	19.1016	16187.4								region	LAC	SHG-rv	6.6738	25559.7
	region	USA	TAO-rs	19.1016	16192.4								region	LAC	SHG-rv	6.6738	25604.4
	region	CAN	TAO-rs	19.1016	16192.4								region	FSU	CMG-rv	6.81	25604.4
	region	CAN	TAO-rs	19.1016	16397.8								region	FSU	CMG-rv	6.81	25716.2
	region	WEU	TAO-rs	19.1016	16397.8								region	NAF	CMG-rv	6.81	25716.2
	region	WEU	TAO-rs	19.1016	16397.9								region	NAF	CMG-rv	6.81	25738.5
	region	EEU	TAO-rs	19.1016	16397.9								region	MEE	CMG-rv	6.81	25738.5
	region	EEU	TAO-rs	19.1016	16397.9								region	MEE	CMG-rv	6.81	25749.8
	region	EAF	TAO-rs	19.1016	16397.9								region	USA	DEG-rv	6.81	25749.8
	region	EAF	TAO-rs	19.1016	16398								region	USA	DEG-rv	6.81	25973.3
	region	WCA	TAO-rs	19.1016	16398								region	CAN	DEG-rv	6.81	25973.3
	region	WCA	TAO-rs	19.1016	16398.3								region	CAN	DEG-rv	6.81	26029.1
	region	SAF	TAO-rs	19.1016	16398.3								region	WEU	DEG-rv	6.81	26029.1
	region	SAF	TAO-rs	19.1016	16398.5								region	WEU	DEG-rv	6.81	26062.7
	region	CHN	TAO-rs	19.1016	16398.5								region	EEU	DEG-rv	6.81	26062.7
	region	CHN	TAO-rs	19.1016	16398.5								region	EEU	DEG-rv	6.81	26096.3
	region	PAS	TAO-rs	19.1016	16398.5								region	EAF	DEG-rv	6.81	26096.3
	region	PAS	TAO-rs	19.1016	16398.7								region	EAF	DEG-rv	6.81	26129.9
	region	LAC	TAO-rs	19.1016	16398.7								region	WCA	DEG-rv	6.81	26129.9
	region	LAC	TAO-rs	19.1016	16536.2								region	WCA	DEG-rv	6.81	26208.2
	region	USA	SHO-rs	19.1016	16536.2								region	SAF	DEG-rv	6.81	26208.2
	region	USA	SHO-rs	19.1016	16869.5								region	SAF	DEG-rv	6.81	26230.7
	region	CAN	SHO-rs	19.1016	16869.5								region	CHN	DEG-rv	6.81	26230.7
	region	CAN	SHO-rs	19.1016	16872								region	CHN	DEG-rv	6.81	26253.2
	region	WEU	SHO-rs	19.1016	16872								region	IND	DEG-rv	6.81	26253.2
	region	WEU	SHO-rs	19.1016	16883.2								region	IND	DEG-rv	6.81	26275.7
	region	EEU	SHO-rs	19.1016	16883.2								region	OSA	DEG-rv	6.81	26275.7
	region	EEU	SHO-rs	19.1016	16883.2								region	OSA	DEG-rv	6.81	26331.5
	region	EAF	SHO-rs	19.1016	16883.2								region	OCN	DEG-rv	6.81	26331.5
	region	EAF	SHO-rs	19.1016	16883.2								region	OCN	DEG-rv	6.81	26354
	region	WCA	SHO-rs	19.1016	16883.2								region	PAS	DEG-rv	6.81	26354
	region	WCA	SHO-rs	19.1016	16899								region	PAS	DEG-rv	6.81	26376.5
	region	SAF	SHO-rs	19.1016	16899								region	LAC	DEG-rv	6.81	26376.5
	region	SAF	SHO-rs	19.1016	16899								region	LAC	DEG-rv	6.81	26443.7
	region	CHN	SHO-rs	19.1016	16899								region	USA	COG-rs	6.9174	26443.7
	region	CHN	SHO-rs	19.1016	16901.3								region	USA	COG-rs	6.9174	26468.2
	region	OEA	SHO-rs	19.1016	16901.3								region	CAN	COG-rs	6.9174	26468.2
	region	OEA	SHO-rs	19.1016	16901.3								region	CAN	COG-rs	6.9174	26498.3
	region	OCN	SHO-rs	19.1016	16901.3								region	WEU	COG-rs	6.9174	26498.3
	region	OCN	SHO-rs	19.1016	16905.1								region	WEU	COG-rs	6.9174	26517.8
	region	PAS	SHO-rs	19.1016	16905.1								region	EEU	COG-rs	6.9174	26517.8
	region	PAS	SHO-rs	19.1016	16906.1								region	EEU	COG-rs	6.9174	26520.3
	region	LAC	SHO-rs	19.1016	16906.1								region	EAF	COG-rs	6.9174	26520.3
	region	LAC	SHO-rs	19.1016	16915.8								region	EAF	COG-rs	6.9174	26522
	region	NAF	COO-rs	19.13	16915.8								region	SAF	COG-rs	6.9174	26522
	region	NAF	COO-rs	19.13	16921.8								region	SAF	COG-rs	6.9174	26523.1
	region	FSU	EHO-rv	21.0526	16921.8								region	CHN	COG-rs	6.9174	26523.1
	region	FSU	EHO-rv	21.0526	16922								region	CHN	COG-rs	6.9174	26542.5
	region	NAF	EHO-rv	21.0526	16922								region	OEA	COG-rs	6.9174	26542.5
	region	NAF	EHO-rv	21.0526	16922								region	OEA	COG-rs	6.9174	26545.6
	region	MEE	EHO-rv	21.0526	16922								region	IND	COG-rs	6.9174	26545.6
	region	MEE	EHO-rv	21.0526	16922								region	IND	COG-rs	6.9174	26547.8
	region	FSU	TAO-rv	21.0526	16922								region	OSA	COG-rs	6.9174	26547.8
	region	FSU	TAO-rv	21.0526	17079.9								region	OSA	COG-rs	6.9174	26550.7
	region	FSU	SHO-rv	21.0526	17079.9								region	PAS	COG-rs	6.9174	26550.7
	region	FSU	SHO-rv	21.0526	17082.1								region	PAS	COG-rs	6.9174	26557.6
	region	NAF	SHO-rv	21.0526	17082.1								region	LAC	COG-rs	6.9174	26557.6
	region	NAF	SHO-rv	21.0526	17083.3								region	LAC	COG-rs	6.9174	26579.9
	region	MEE	SHO-rv	21.0526	17083.3								region	ARC	COG-rs	6.9174	26579.9
	region	MEE	SHO-rv	21.0526	17084.6								region	ARC	COG-rs	6.9174	26743.8
	region	USA	EHO-rs	21.7069	17084.6								region	FSU	SHG-rv	7.1278	26743.8
	region	USA	EHO-rs	21.7069	17204.5								region	FSU	SHG-rv	7.1278	26864.5
	region	CAN	EHO-rs	21.7069	17204.5								region	NAF	SHG-rv	7.1278	26864.5
	region	CAN	EHO-rs	21.7069	17272.3								region	NAF	SHG-rv	7.1278	26872.5
	region	WEU	EHO-rs	21.7069	17272.3								region	MEE	SHG-rv	7.1278	26872.5
	region	WEU	EHO-rs	21.7069	17272.8								region	MEE	SHG-rv	7.1278	26880.6
	region	EEU	EHO-rs	21.7069	17272.8								region	FSU	DEG-rv	7.4	26880.6
	region	EEU	EHO-rs	21.7069	17272.8								region	FSU	DEG-rv	7.4	27020.3
	region	CHN	EHO-rs	21.7069	17272.8								region	NAF	DEG-rv	7.4	27020.3
	region	CHN	EHO-rs	21.7069	17278.2								region	NAF	DEG-rv	7.4	27066.9
	region	OEA	EHO-rs	21.7069	17278.2								region	MEE	DEG-rv	7.4	27066.9
	region	OEA	EHO-rs	21.7069	17279.8								region	MEE	DEG-rv	7.4	27099.6
	region	IND	EHO-rs	21.7069	17279.8								region	FSU	TIG-rv	7.4898	27099.6
	region	IND	EHO-rs	21.7069	17280.2								region	FSU	TIG-rv	7.4898	27282.1
	region	LAC	EHO-rs	21.7069	17280.2								region	NAF	TIG-rv	7.4898	27282.1
	region	LAC	EHO-rs	21.7069	17280.3								region	NAF	TIG-rv	7.4898	27334.2
	region	USA	TAO-rs	21.7069	17280.3								region	MEE	TIG-rv	7.4898	27334.2
	region	USA	TAO-rs	21.7069	17285.3								region	MEE	TIG-rv	7.4898	27432.1
	region	CAN	TAO-rs	21.7069	17285.3								region	USA	COG-rs	7.5348	27432.1
	region	CAN	TAO-rs	21.7069	17490.7								region	USA	COG-rs	7.5348	27456.6
	region	WEU	TAO-rs	21.7069	17490.7								region	CAN	COG-rs	7.5348	27456.6
	region	WEU	TAO-rs	21.7069	17490.8								region	CAN	COG-rs	7.5348	27486.6
	region	EEU	TAO-rs	21.7069	17490.8								region	WEU	COG-rs	7.5348	27486.6
	region	EEU	TAO-rs	21.7069	17490.8								region	WEU	COG-rs	7.5348	27506.2
	region	EAF	TAO-rs	21.7069	17490.8								region	EEU	COG-rs	7.5348	27506.2
	region	EAF	TAO-rs	21.7069	17490.9								region	EEU	COG-rs	7.5348	27508.7
	region	WCA	TAO-rs	21.7069	17490.9								region	EAF	COG-rs	7.5348	27508.7
	region	WCA	TAO-rs	21.7069	17491.2								region	EAF	COG-rs	7.5348	27510.3
	region	SAF	TAO-rs	21.7069	17491.2								region	SAF	COG-rs	7.5348	27510.3
	region	SAF	TAO-rs	21.7069	17491.4								region	SAF	COG-rs	7.5348	27511.5
	region	CHN	TAO-rs	21.7069	17491.4								region	CHN	COG-rs	7.5348	27511.5
	region	CHN	TAO-rs	21.7069	17491.4								region	CHN	COG-rs	7.5348	27530.8
	region	PAS	TAO-rs	21.7069	17491.4								region	OEA	COG-rs	7.5348	27530.8
	region	PAS	TAO-rs	21.7069	17491.6								region	OEA	COG-rs	7.5348	27534
	region	LAC	TAO-rs	21.7069	17491.6								region	IND	COG-rs	7.5348	27534
	region	LAC	TAO-rs	21.7069	17629.2								region	IND	COG-rs	7.5348	27536.1
	region	USA	SHO-rs	21.7069	17629.2								region	OSA	COG-rs	7.5348	27536.1
	region	USA	SHO-rs	21.7069	17962.5								region	OSA	COG-rs	7.5348	27539.1
	region	CAN	SHO-rs	21.7069	17962.5								region	PAS	COG-rs	7.5348	27539.1
	region	CAN	SHO-rs	21.7069	17964.9								region	PAS	COG-rs	7.5348	27546
	region	WEU	SHO-rs	21.7069	17964.9								region	LAC	COG-rs	7.5348	27546
	region	WEU	SHO-rs	21.7069	17976.1								region	LAC	COG-rs	7.5348	27568.3
	region	EEU	SHO-rs	21.7069	17976.1								region	ARC	COG-rs	7.5348	27568.3
	region	EEU	SHO-rs	21.7069	17976.2								region	ARC	COG-rs	7.5348	27732.2
	region	EAF	SHO-rs	21.7069	17976.2								region	NAF	COG-rv	7.78	27732.2
	region	EAF	SHO-rs	21.7069	17976.2								region	NAF	COG-rv	7.78	27739.3
	region	WCA	SHO-rs	21.7069	17976.2								region	NAF	COG-rs	7.78	27739.3
	region	WCA	SHO-rs	21.7069	17992								region	NAF	COG-rs	7.78	27778.7
	region	SAF	SHO-rs	21.7069	17992								region	USA	COG-rs	8.1522	27778.7
	region	SAF	SHO-rs	21.7069	17992								region	USA	COG-rs	8.1522	27803.2
	region	CHN	SHO-rs	21.7069	17992								region	CAN	COG-rs	8.1522	27803.2
	region	CHN	SHO-rs	21.7069	17994.2								region	CAN	COG-rs	8.1522	27833.2
	region	OEA	SHO-rs	21.7069	17994.2								region	WEU	COG-rs	8.1522	27833.2
	region	OEA	SHO-rs	21.7069	17994.3								region	WEU	COG-rs	8.1522	27852.8
	region	OCN	SHO-rs	21.7069	17994.3								region	EEU	COG-rs	8.1522	27852.8
	region	OCN	SHO-rs	21.7069	17999.3								region	EEU	COG-rs	8.1522	27855.3
	region	PAS	SHO-rs	21.7069	17999.3								region	EAF	COG-rs	8.1522	27855.3
	region	PAS	SHO-rs	21.7069	18000.6								region	EAF	COG-rs	8.1522	27856.9
	region	LAC	SHO-rs	21.7069	18000.6								region	SAF	COG-rs	8.1522	27856.9
	region	LAC	SHO-rs	21.7069	18010.4								region	SAF	COG-rs	8.1522	27858.1
	region	FSU	EHO-rs	23.6842	18010.4								region	CHN	COG-rs	8.1522	27858.1
	region	FSU	EHO-rs	23.6842	18010.6								region	CHN	COG-rs	8.1522	27877.4
	region	MEE	EHO-rs	23.6842	18010.6								region	OEA	COG-rs	8.1522	27877.4
	region	MEE	EHO-rs	23.6842	18098.6								region	OEA	COG-rs	8.1522	27880.6
	region	FSU	TAO-rs	23.6842	18098.6								region	IND	COG-rs	8.1522	27880.6
	region	FSU	TAO-rs	23.6842	18219.7								region	IND	COG-rs	8.1522	27882.7
	region	FSU	SHO-rs	23.6842	18219.7								region	OSA	COG-rs	8.1522	27882.7
	region	FSU	SHO-rs	23.6842	18251								region	OSA	COG-rs	8.1522	27885.7
	region	MEE	SHO-rs	23.6842	18251								region	PAS	COG-rs	8.1522	27885.7
	region	MEE	SHO-rs	23.6842	18256.8								region	PAS	COG-rs	8.1522	27892.6
	region	USA	EHO-rs	25.6148	18256.8								region	LAC	COG-rs	8.1522	27892.6
	region	USA	EHO-rs	25.6148	18526.7								region	LAC	COG-rs	8.1522	27914.9
	region	CAN	EHO-rs	25.6148	18526.7								region	ARC	COG-rs	8.1522	27914.9
	region	CAN	EHO-rs	25.6148	18560.6								region	ARC	COG-rs	8.1522	28078.8
	region	WEU	EHO-rs	25.6148	18560.6								region	USA	SHG-rv	8.15556	28078.8
	region	WEU	EHO-rs	25.6148	18562.5								region	USA	SHG-rv	8.15556	28544.5
	region	EEU	EHO-rs	25.6148	18562.5								region	CAN	SHG-rv	8.15556	28544.5
	region	EEU	EHO-rs	25.6148	18562.6								region	CAN	SHG-rv	8.15556	28591
	region	CHN	EHO-rs	25.6148	18562.6								region	WEU	SHG-rv	8.15556	28591
	region	CHN	EHO-rs	25.6148	18578								region	WEU	SHG-rv	8.15556	28647
	region	OEA	EHO-rs	25.6148	18578								region	EEU	SHG-rv	8.15556	28647
	region	OEA	EHO-rs	25.6148	18581.9								region	EEU	SHG-rv	8.15556	28703
	region	IND	EHO-rs	25.6148	18581.9								region	EAF	SHG-rv	8.15556	28703
	region	IND	EHO-rs	25.6148	18583								region	EAF	SHG-rv	8.15556	28721.8
	region	LAC	EHO-rs	25.6148	18583								region	WCA	SHG-rv	8.15556	28721.8
	region	LAC	EHO-rs	25.6148	18583.2								region	WCA	SHG-rv	8.15556	28796.3
	region	USA	TAO-rs	25.6148	18583.2								region	SAF	SHG-rv	8.15556	28796.3
	region	USA	TAO-rs	25.6148	18594.3								region	SAF	SHG-rv	8.15556	28815
	region	CAN	TAO-rs	25.6148	18594.3								region	CHN	SHG-rv	8.15556	28815
	region	CAN	TAO-rs	25.6148	18697.1								region	CHN	SHG-rv	8.15556	28833.8
	region	WEU	TAO-rs	25.6148	18697.1								region	OEA	SHG-rv	8.15556	28833.8
	region	WEU	TAO-rs	25.6148	18697.3								region	OEA	SHG-rv	8.15556	28852.5
	region	EEU	TAO-rs	25.6148	18697.3								region	IND	SHG-rv	8.15556	28852.5
	region	EEU	TAO-rs	25.6148	18697.4								region	IND	SHG-rv	8.15556	28871.3
	region	EAF	TAO-rs	25.6148	18697.4								region	OSA	SHG-rv	8.15556	28871.3
	region	EAF	TAO-rs	25.6148	18697.7								region	OSA	SHG-rv	8.15556	28927.3
	region	WCA	TAO-rs	25.6148	18697.7								region	OCN	SHG-rv	8.15556	28927.3
	region	WCA	TAO-rs	25.6148	18698.2								region	OCN	SHG-rv	8.15556	28964.5
	region	SAF	TAO-rs	25.6148	18698.2								region	PAS	SHG-rv	8.15556	28964.5
	region	SAF	TAO-rs	25.6148	18698.6								region	PAS	SHG-rv	8.15556	28983.3
	region	CHN	TAO-rs	25.6148	18698.6								region	LAC	SHG-rv	8.15556	28983.3
	region	CHN	TAO-rs	25.6148	18698.8								region	LAC	SHG-rv	8.15556	29020.5
	region	PAS	TAO-rs	25.6148	18698.8								region	FSU	CMG-rv	8.322	29020.5
	region	PAS	TAO-rs	25.6148	18699.1								region	FSU	CMG-rv	8.322	29113.6
	region	LAC	TAO-rs	25.6148	18699.1								region	NAF	CMG-rv	8.322	29113.6
	region	LAC	TAO-rs	25.6148	19065.9								region	NAF	CMG-rv	8.322	29132.3
	region	USA	SHO-rs	25.6148	19065.9								region	MEE	CMG-rv	8.322	29132.3
	region	USA	SHO-rs	25.6148	19815.9								region	MEE	CMG-rv	8.322	29141.6
	region	CAN	SHO-rs	25.6148	19815.9								region	USA	DEG-rv	8.322	29141.6
	region	CAN	SHO-rs	25.6148	19817.1								region	USA	DEG-rv	8.322	29327.9
	region	WEU	SHO-rs	25.6148	19817.1								region	CAN	DEG-rv	8.322	29327.9
	region	WEU	SHO-rs	25.6148	19862								region	CAN	DEG-rv	8.322	29374.4
	region	EEU	SHO-rs	25.6148	19862								region	WEU	DEG-rv	8.322	29374.4
	region	EEU	SHO-rs	25.6148	19862.2								region	WEU	DEG-rv	8.322	29402.4
	region	EAF	SHO-rs	25.6148	19862.2								region	EEU	DEG-rv	8.322	29402.4
	region	EAF	SHO-rs	25.6148	19862.2								region	EEU	DEG-rv	8.322	29430.4
	region	WCA	SHO-rs	25.6148	19862.2								region	EAF	DEG-rv	8.322	29430.4
	region	WCA	SHO-rs	25.6148	19893.9								region	EAF	DEG-rv	8.322	29458.4
	region	SAF	SHO-rs	25.6148	19893.9								region	WCA	DEG-rv	8.322	29458.4
	region	SAF	SHO-rs	25.6148	19893.9								region	WCA	DEG-rv	8.322	29523.6
	region	CHN	SHO-rs	25.6148	19893.9								region	SAF	DEG-rv	8.322	29523.6
	region	CHN	SHO-rs	25.6148	19900.2								region	SAF	DEG-rv	8.322	29542.4
	region	OEA	SHO-rs	25.6148	19900.2								region	CHN	DEG-rv	8.322	29542.4
	region	OEA	SHO-rs	25.6148	19900.3								region	CHN	DEG-rv	8.322	29561.1
	region	OCN	SHO-rs	25.6148	19900.3								region	IND	DEG-rv	8.322	29561.1
	region	OCN	SHO-rs	25.6148	19912.9								region	IND	DEG-rv	8.322	29579.9
	region	PAS	SHO-rs	25.6148	19912.9								region	OSA	DEG-rv	8.322	29579.9
	region	PAS	SHO-rs	25.6148	19915.5								region	OSA	DEG-rv	8.322	29626.4
	region	LAC	SHO-rs	25.6148	19915.5								region	OCN	DEG-rv	8.322	29626.4
	region	LAC	SHO-rs	25.6148	19941.6								region	OCN	DEG-rv	8.322	29645.1
	region	FSU	EHO-rs	26.3158	19941.6								region	PAS	DEG-rv	8.322	29645.1
	region	FSU	EHO-rs	26.3158	19941.8								region	PAS	DEG-rv	8.322	29663.9
	region	NAF	EHO-rs	26.3158	19941.8								region	LAC	DEG-rv	8.322	29663.9
	region	NAF	EHO-rs	26.3158	19941.9								region	LAC	DEG-rv	8.322	29719.9
	region	MEE	EHO-rs	26.3158	19941.9								region	USA	CMG-rs	8.447	29719.9
	region	MEE	EHO-rs	26.3158	20000.6								region	USA	CMG-rs	8.447	29795.3
	region	FSU	TAO-rs	26.3158	20000.6								region	CAN	CMG-rs	8.447	29795.3
	region	FSU	TAO-rs	26.3158	20121.7								region	CAN	CMG-rs	8.447	29820.5
	region	FSU	SHO-rs	26.3158	20121.7								region	WEU	CMG-rs	8.447	29820.5
	region	FSU	SHO-rs	26.3158	20152.9								region	WEU	CMG-rs	8.447	29845.7
	region	NAF	SHO-rs	26.3158	20152.9								region	EEU	CMG-rs	8.447	29845.7
	region	NAF	SHO-rs	26.3158	20155.9								region	EEU	CMG-rs	8.447	29854
	region	MEE	SHO-rs	26.3158	20155.9								region	EAF	CMG-rs	8.447	29854
	region	MEE	SHO-rs	26.3158	20159.8								region	EAF	CMG-rs	8.447	29862.4
	region	FSU	EHO-rs	30.2632	20159.8								region	WCA	CMG-rs	8.447	29862.4
	region	FSU	EHO-rs	30.2632	20160								region	WCA	CMG-rs	8.447	29870.8
	region	NAF	EHO-rs	30.2632	20160								region	SAF	CMG-rs	8.447	29870.8
	region	NAF	EHO-rs	30.2632	20160.2								region	SAF	CMG-rs	8.447	29879.1
	region	MEE	EHO-rs	30.2632	20160.2								region	CHN	CMG-rs	8.447	29879.1
	region	MEE	EHO-rs	30.2632	20218.9								region	CHN	CMG-rs	8.447	29946.2
	region	FSU	TAO-rs	30.2632	20218.9								region	OEA	CMG-rs	8.447	29946.2
	region	FSU	TAO-rs	30.2632	20340								region	OEA	CMG-rs	8.447	29947.9
	region	FSU	SHO-rs	30.2632	20340								region	IND	CMG-rs	8.447	29947.9
	region	FSU	SHO-rs	30.2632	20371.3								region	IND	CMG-rs	8.447	29973
	region	NAF	SHO-rs	30.2632	20371.3								region	OSA	CMG-rs	8.447	29973
	region	NAF	SHO-rs	30.2632	20377.3								region	OSA	CMG-rs	8.447	29978
	region	MEE	SHO-rs	30.2632	20377.3								region	JPN	CMG-rs	8.447	29978
	region	MEE	SHO-rs	30.2632	20381.2								region	JPN	CMG-rs	8.447	29983.1
	region	USA	EHO-rs	30.8253	20381.2								region	OCN	CMG-rs	8.447	29983.1
	region	USA	EHO-rs	30.8253	20516.1								region	OCN	CMG-rs	8.447	29999.9
	region	CAN	EHO-rs	30.8253	20516.1								region	PAS	CMG-rs	8.447	29999.9
	region	CAN	EHO-rs	30.8253	20770.2								region	PAS	CMG-rs	8.447	30004.9
	region	WEU	EHO-rs	30.8253	20770.2								region	LAC	CMG-rs	8.447	30004.9
	region	WEU	EHO-rs	30.8253	20770.7								region	LAC	CMG-rs	8.447	30030.1
	region	EEU	EHO-rs	30.8253	20770.7								region	USA	TIG-rs	8.447	30030.1
	region	EEU	EHO-rs	30.8253	20770.7								region	USA	TIG-rs	8.447	30093.8
	region	CHN	EHO-rs	30.8253	20770.7								region	CAN	TIG-rs	8.447	30093.8
	region	CHN	EHO-rs	30.8253	20777.7								region	CAN	TIG-rs	8.447	30130.7
	region	OEA	EHO-rs	30.8253	20777.7								region	WEU	TIG-rs	8.447	30130.7
	region	OEA	EHO-rs	30.8253	20779.4								region	WEU	TIG-rs	8.447	30139.1
	region	IND	EHO-rs	30.8253	20779.4								region	EEU	TIG-rs	8.447	30139.1
	region	IND	EHO-rs	30.8253	20780.1								region	EEU	TIG-rs	8.447	30147.4
	region	LAC	EHO-rs	30.8253	20780.1								region	EAF	TIG-rs	8.447	30147.4
	region	LAC	EHO-rs	30.8253	20780.4								region	EAF	TIG-rs	8.447	30155.8
	region	USA	TAO-rs	30.8253	20780.4								region	WCA	TIG-rs	8.447	30155.8
	region	USA	TAO-rs	30.8253	20785.9								region	WCA	TIG-rs	8.447	30181
	region	CAN	TAO-rs	30.8253	20785.9								region	SAF	TIG-rs	8.447	30181
	region	CAN	TAO-rs	30.8253	21556.5								region	SAF	TIG-rs	8.447	30189.3
	region	WEU	TAO-rs	30.8253	21556.5								region	CHN	TIG-rs	8.447	30189.3
	region	WEU	TAO-rs	30.8253	21556.5								region	CHN	TIG-rs	8.447	30197.7
	region	EEU	TAO-rs	30.8253	21556.5								region	OEA	TIG-rs	8.447	30197.7
	region	EEU	TAO-rs	30.8253	21556.6								region	OEA	TIG-rs	8.447	30206.1
	region	EAF	TAO-rs	30.8253	21556.6								region	IND	TIG-rs	8.447	30206.1
	region	EAF	TAO-rs	30.8253	21556.7								region	IND	TIG-rs	8.447	30214.4
	region	WCA	TAO-rs	30.8253	21556.7								region	OSA	TIG-rs	8.447	30214.4
	region	WCA	TAO-rs	30.8253	21557								region	OSA	TIG-rs	8.447	30231.2
	region	SAF	TAO-rs	30.8253	21557								region	OCN	TIG-rs	8.447	30231.2
	region	SAF	TAO-rs	30.8253	21557.3								region	OCN	TIG-rs	8.447	30239.6
	region	CHN	TAO-rs	30.8253	21557.3								region	PAS	TIG-rs	8.447	30239.6
	region	CHN	TAO-rs	30.8253	21557.4								region	PAS	TIG-rs	8.447	30256.4
	region	PAS	TAO-rs	30.8253	21557.4								region	LAC	TIG-rs	8.447	30256.4
	region	PAS	TAO-rs	30.8253	21557.8								region	LAC	TIG-rs	8.447	30281.5
	region	LAC	TAO-rs	30.8253	21557.8								region	FSU	SHG-rv	8.71036	30281.5
	region	LAC	TAO-rs	30.8253	21970.4								region	FSU	SHG-rv	8.71036	30382.1
	region	USA	SHO-rs	30.8253	21970.4								region	NAF	SHG-rv	8.71036	30382.1
	region	USA	SHO-rs	30.8253	22345.4								region	NAF	SHG-rv	8.71036	30388.8
	region	CAN	SHO-rs	30.8253	22345.4								region	MEE	SHG-rv	8.71036	30388.8
	region	CAN	SHO-rs	30.8253	22354.5								region	MEE	SHG-rv	8.71036	30395.5
	region	WEU	SHO-rs	30.8253	22354.5								region	NAF	COG-rv	8.89	30395.5
	region	WEU	SHO-rs	30.8253	22365.7								region	NAF	COG-rv	8.89	30402.7
	region	EEU	SHO-rs	30.8253	22365.7								region	NAF	COG-rs	8.89	30402.7
	region	EEU	SHO-rs	30.8253	22365.8								region	NAF	COG-rs	8.89	30442
	region	EAF	SHO-rs	30.8253	22365.8								region	FSU	DEG-rv	9.08	30442
	region	EAF	SHO-rs	30.8253	22365.8								region	FSU	DEG-rv	9.08	30609.7
	region	WCA	SHO-rs	30.8253	22365.8								region	NAF	DEG-rv	9.08	30609.7
	region	WCA	SHO-rs	30.8253	22389.5								region	NAF	DEG-rv	9.08	30665.7
	region	SAF	SHO-rs	30.8253	22389.5								region	MEE	DEG-rv	9.08	30665.7
	region	SAF	SHO-rs	30.8253	22389.5								region	MEE	DEG-rv	9.08	30704.8
	region	CHN	SHO-rs	30.8253	22389.5								region	NAF	COG-rs	10	30704.8
	region	CHN	SHO-rs	30.8253	22392.4								region	NAF	COG-rs	10	30722.2
	region	OEA	SHO-rs	30.8253	22392.4								region	USA	CMG-rs	10.1858	30722.2
	region	OEA	SHO-rs	30.8253	22392.4								region	USA	CMG-rs	10.1858	30797.6
	region	OCN	SHO-rs	30.8253	22392.4								region	CAN	CMG-rs	10.1858	30797.6
	region	OCN	SHO-rs	30.8253	22398.1								region	CAN	CMG-rs	10.1858	30822.8
	region	PAS	SHO-rs	30.8253	22398.1								region	WEU	CMG-rs	10.1858	30822.8
	region	PAS	SHO-rs	30.8253	22400.6								region	WEU	CMG-rs	10.1858	30848
	region	LAC	SHO-rs	30.8253	22400.6								region	EEU	CMG-rs	10.1858	30848
	region	LAC	SHO-rs	30.8253	22429.9								region	EEU	CMG-rs	10.1858	30856.3
	region	FSU	EHO-rs	36.1842	22429.9								region	EAF	CMG-rs	10.1858	30856.3
	region	FSU	EHO-rs	36.1842	22430.2								region	EAF	CMG-rs	10.1858	30864.7
	region	NAF	EHO-rs	36.1842	22430.2								region	WCA	CMG-rs	10.1858	30864.7
	region	NAF	EHO-rs	36.1842	22431.1								region	WCA	CMG-rs	10.1858	30873.1
	region	MEE	EHO-rs	36.1842	22431.1								region	SAF	CMG-rs	10.1858	30873.1
	region	MEE	EHO-rs	36.1842	22519.2								region	SAF	CMG-rs	10.1858	30881.4
	region	FSU	TAO-rs	36.1842	22519.2								region	CHN	CMG-rs	10.1858	30881.4
	region	FSU	TAO-rs	36.1842	22761.3								region	CHN	CMG-rs	10.1858	30948.5
	region	FSU	SHO-rs	36.1842	22761.3								region	OEA	CMG-rs	10.1858	30948.5
	region	FSU	SHO-rs	36.1842	22823.8								region	OEA	CMG-rs	10.1858	30950.1
	region	NAF	SHO-rs	36.1842	22823.8								region	IND	CMG-rs	10.1858	30950.1
	region	NAF	SHO-rs	36.1842	22844.9								region	IND	CMG-rs	10.1858	30975.3
	region	MEE	SHO-rs	36.1842	22844.9								region	OSA	CMG-rs	10.1858	30975.3
	region	MEE	SHO-rs	36.1842	22850.7								region	OSA	CMG-rs	10.1858	30980.3
	region	USA	EHO-rs	37.3385	22850.7								region	JPN	CMG-rs	10.1858	30980.3
	region	USA	EHO-rs	37.3385	23030.7								region	JPN	CMG-rs	10.1858	30985.4
	region	CAN	EHO-rs	37.3385	23030.7								region	OCN	CMG-rs	10.1858	30985.4
	region	CAN	EHO-rs	37.3385	23132.3								region	OCN	CMG-rs	10.1858	31002.2
	region	WEU	EHO-rs	37.3385	23132.3								region	PAS	CMG-rs	10.1858	31002.2
	region	WEU	EHO-rs	37.3385	23133								region	PAS	CMG-rs	10.1858	31007.2
	region	EEU	EHO-rs	37.3385	23133								region	LAC	CMG-rs	10.1858	31007.2
	region	EEU	EHO-rs	37.3385	23133								region	LAC	CMG-rs	10.1858	31032.4
	region	CHN	EHO-rs	37.3385	23133								region	USA	TIG-rs	10.1858	31032.4
	region	CHN	EHO-rs	37.3385	23141.1								region	USA	TIG-rs	10.1858	31096.1
	region	OEA	EHO-rs	37.3385	23141.1								region	CAN	TIG-rs	10.1858	31096.1
	region	OEA	EHO-rs	37.3385	23142.9								region	CAN	TIG-rs	10.1858	31133
	region	IND	EHO-rs	37.3385	23142.9								region	WEU	TIG-rs	10.1858	31133
	region	IND	EHO-rs	37.3385	23143.4								region	WEU	TIG-rs	10.1858	31141.4
	region	LAC	EHO-rs	37.3385	23143.4								region	EEU	TIG-rs	10.1858	31141.4
	region	LAC	EHO-rs	37.3385	23143.6								region	EEU	TIG-rs	10.1858	31149.7
	region	USA	TAO-rs	37.3385	23143.6								region	EAF	TIG-rs	10.1858	31149.7
	region	USA	TAO-rs	37.3385	23151								region	EAF	TIG-rs	10.1858	31158.1
	region	CAN	TAO-rs	37.3385	23151								region	WCA	TIG-rs	10.1858	31158.1
	region	CAN	TAO-rs	37.3385	23459.2								region	WCA	TIG-rs	10.1858	31183.2
	region	WEU	TAO-rs	37.3385	23459.2								region	SAF	TIG-rs	10.1858	31183.2
	region	WEU	TAO-rs	37.3385	23459.3								region	SAF	TIG-rs	10.1858	31191.6
	region	EEU	TAO-rs	37.3385	23459.3								region	CHN	TIG-rs	10.1858	31191.6
	region	EEU	TAO-rs	37.3385	23459.3								region	CHN	TIG-rs	10.1858	31200
	region	EAF	TAO-rs	37.3385	23459.3								region	OEA	TIG-rs	10.1858	31200
	region	EAF	TAO-rs	37.3385	23459.4								region	OEA	TIG-rs	10.1858	31208.4
	region	WCA	TAO-rs	37.3385	23459.4								region	IND	TIG-rs	10.1858	31208.4
	region	WCA	TAO-rs	37.3385	23459.8								region	IND	TIG-rs	10.1858	31216.7
	region	SAF	TAO-rs	37.3385	23459.8								region	OSA	TIG-rs	10.1858	31216.7
	region	SAF	TAO-rs	37.3385	23460.1								region	OSA	TIG-rs	10.1858	31233.5
	region	CHN	TAO-rs	37.3385	23460.1								region	OCN	TIG-rs	10.1858	31233.5
	region	CHN	TAO-rs	37.3385	23460.2								region	OCN	TIG-rs	10.1858	31241.9
	region	PAS	TAO-rs	37.3385	23460.2								region	PAS	TIG-rs	10.1858	31241.9
	region	PAS	TAO-rs	37.3385	23460.4								region	PAS	TIG-rs	10.1858	31258.7
	region	LAC	TAO-rs	37.3385	23460.4								region	LAC	TIG-rs	10.1858	31258.7
	region	LAC	TAO-rs	37.3385	23666.7								region	LAC	TIG-rs	10.1858	31283.8
	region	USA	SHO-rs	37.3385	23666.7								region	NAF	COG-rs	10.98	31283.8
	region	USA	SHO-rs	37.3385	24166.7								region	NAF	COG-rs	10.98	31301.2
	region	CAN	SHO-rs	37.3385	24166.7								region	FSU	DEG-rv	11.096	31301.2
	region	CAN	SHO-rs	37.3385	24170.3								region	FSU	DEG-rv	11.096	31440.9
	region	WEU	SHO-rs	37.3385	24170.3								region	NAF	DEG-rv	11.096	31440.9
	region	WEU	SHO-rs	37.3385	24187.2								region	NAF	DEG-rv	11.096	31487.6
	region	EEU	SHO-rs	37.3385	24187.2								region	MEE	DEG-rv	11.096	31487.6
	region	EEU	SHO-rs	37.3385	24187.2								region	MEE	DEG-rv	11.096	31520.2
	region	EAF	SHO-rs	37.3385	24187.2								region	FSU	CMG-rs	11.8258	31520.2
	region	EAF	SHO-rs	37.3385	24187.2								region	FSU	CMG-rs	11.8258	31541.1
	region	WCA	SHO-rs	37.3385	24187.2								region	NAF	CMG-rs	11.8258	31541.1
	region	WCA	SHO-rs	37.3385	24211								region	NAF	CMG-rs	11.8258	31545.3
	region	SAF	SHO-rs	37.3385	24211								region	MEE	CMG-rs	11.8258	31545.3
	region	SAF	SHO-rs	37.3385	24211								region	MEE	CMG-rs	11.8258	31547.4
	region	CHN	SHO-rs	37.3385	24211								region	NAF	COG-rs	11.96	31547.4
	region	CHN	SHO-rs	37.3385	24214.3								region	NAF	COG-rs	11.96	31564.8
	region	OEA	SHO-rs	37.3385	24214.3								region	USA	CMG-rs	12.0985	31564.8
	region	OEA	SHO-rs	37.3385	24214.4								region	USA	CMG-rs	12.0985	31631.9
	region	OCN	SHO-rs	37.3385	24214.4								region	CAN	CMG-rs	12.0985	31631.9
	region	OCN	SHO-rs	37.3385	24220								region	CAN	CMG-rs	12.0985	31654.2
	region	PAS	SHO-rs	37.3385	24220								region	WEU	CMG-rs	12.0985	31654.2
	region	PAS	SHO-rs	37.3385	24221.5								region	WEU	CMG-rs	12.0985	31676.6
	region	LAC	SHO-rs	37.3385	24221.5								region	EEU	CMG-rs	12.0985	31676.6
	region	LAC	SHO-rs	37.3385	24236.2								region	EEU	CMG-rs	12.0985	31684
	region	FSU	EHO-rs	44.0789	24236.2								region	EAF	CMG-rs	12.0985	31684
	region	FSU	EHO-rs	44.0789	24236.4								region	EAF	CMG-rs	12.0985	31691.5
	region	MEE	EHO-rs	44.0789	24236.4								region	WCA	CMG-rs	12.0985	31691.5
	region	MEE	EHO-rs	44.0789	24368.5								region	WCA	CMG-rs	12.0985	31698.9
	region	FSU	TAO-rs	44.0789	24368.5								region	SAF	CMG-rs	12.0985	31698.9
	region	FSU	TAO-rs	44.0789	24550.1								region	SAF	CMG-rs	12.0985	31706.3
	region	FSU	SHO-rs	44.0789	24550.1								region	CHN	CMG-rs	12.0985	31706.3
	region	FSU	SHO-rs	44.0789	24597								region	CHN	CMG-rs	12.0985	31765.9
	region	MEE	SHO-rs	44.0789	24597								region	OEA	CMG-rs	12.0985	31765.9
	region	MEE	SHO-rs	44.0789	24605.7								region	OEA	CMG-rs	12.0985	31767.4
	region	USA	EHO-rs	45.1542	24605.7								region	IND	CMG-rs	12.0985	31767.4
	region	USA	EHO-rs	45.1542	24785.7								region	IND	CMG-rs	12.0985	31789.8
	region	CAN	EHO-rs	45.1542	24785.7								region	OSA	CMG-rs	12.0985	31789.8
	region	CAN	EHO-rs	45.1542	24887.3								region	OSA	CMG-rs	12.0985	31794.3
	region	WEU	EHO-rs	45.1542	24887.3								region	JPN	CMG-rs	12.0985	31794.3
	region	WEU	EHO-rs	45.1542	24888								region	JPN	CMG-rs	12.0985	31798.7
	region	EEU	EHO-rs	45.1542	24888								region	OCN	CMG-rs	12.0985	31798.7
	region	EEU	EHO-rs	45.1542	24888								region	OCN	CMG-rs	12.0985	31813.7
	region	CHN	EHO-rs	45.1542	24888								region	PAS	CMG-rs	12.0985	31813.7
	region	CHN	EHO-rs	45.1542	24896.1								region	PAS	CMG-rs	12.0985	31818.1
	region	OEA	EHO-rs	45.1542	24896.1								region	LAC	CMG-rs	12.0985	31818.1
	region	OEA	EHO-rs	45.1542	24898.5								region	LAC	CMG-rs	12.0985	31840.5
	region	IND	EHO-rs	45.1542	24898.5								region	USA	TIG-rs	12.0985	31840.5
	region	IND	EHO-rs	45.1542	24899.2								region	USA	TIG-rs	12.0985	31897.1
	region	LAC	EHO-rs	45.1542	24899.2								region	CAN	TIG-rs	12.0985	31897.1
	region	LAC	EHO-rs	45.1542	24899.3								region	CAN	TIG-rs	12.0985	31929.9
	region	USA	TAO-rs	45.1542	24899.3								region	WEU	TIG-rs	12.0985	31929.9
	region	USA	TAO-rs	45.1542	24906.8								region	WEU	TIG-rs	12.0985	31937.4
	region	CAN	TAO-rs	45.1542	24906.8								region	EEU	TIG-rs	12.0985	31937.4
	region	CAN	TAO-rs	45.1542	25215								region	EEU	TIG-rs	12.0985	31944.8
	region	WEU	TAO-rs	45.1542	25215								region	EAF	TIG-rs	12.0985	31944.8
	region	WEU	TAO-rs	45.1542	25215.1								region	EAF	TIG-rs	12.0985	31952.3
	region	EEU	TAO-rs	45.1542	25215.1								region	WCA	TIG-rs	12.0985	31952.3
	region	EEU	TAO-rs	45.1542	25215.1								region	WCA	TIG-rs	12.0985	31974.6
	region	EAF	TAO-rs	45.1542	25215.1								region	SAF	TIG-rs	12.0985	31974.6
	region	EAF	TAO-rs	45.1542	25215.2								region	SAF	TIG-rs	12.0985	31982.1
	region	WCA	TAO-rs	45.1542	25215.2								region	CHN	TIG-rs	12.0985	31982.1
	region	WCA	TAO-rs	45.1542	25215.6								region	CHN	TIG-rs	12.0985	31989.5
	region	SAF	TAO-rs	45.1542	25215.6								region	OEA	TIG-rs	12.0985	31989.5
	region	SAF	TAO-rs	45.1542	25215.9								region	OEA	TIG-rs	12.0985	31996.9
	region	CHN	TAO-rs	45.1542	25215.9								region	IND	TIG-rs	12.0985	31996.9
	region	CHN	TAO-rs	45.1542	25216								region	IND	TIG-rs	12.0985	32004.4
	region	PAS	TAO-rs	45.1542	25216								region	OSA	TIG-rs	12.0985	32004.4
	region	PAS	TAO-rs	45.1542	25216.3								region	OSA	TIG-rs	12.0985	32019.3
	region	LAC	TAO-rs	45.1542	25216.3								region	OCN	TIG-rs	12.0985	32019.3
	region	LAC	TAO-rs	45.1542	25422.6								region	OCN	TIG-rs	12.0985	32026.7
	region	USA	SHO-rs	45.1542	25422.6								region	PAS	TIG-rs	12.0985	32026.7
	region	USA	SHO-rs	45.1542	25922.6								region	PAS	TIG-rs	12.0985	32041.7
	region	CAN	SHO-rs	45.1542	25922.6								region	LAC	TIG-rs	12.0985	32041.7
	region	CAN	SHO-rs	45.1542	25926.2								region	LAC	TIG-rs	12.0985	32064
	region	WEU	SHO-rs	45.1542	25926.2								region	USA	DEG-rs	12.1637	32064
	region	WEU	SHO-rs	45.1542	25943.1								region	USA	DEG-rs	12.1637	32139.5
	region	EEU	SHO-rs	45.1542	25943.1								region	CAN	DEG-rs	12.1637	32139.5
	region	EEU	SHO-rs	45.1542	25943.1								region	CAN	DEG-rs	12.1637	32156.3
	region	EAF	SHO-rs	45.1542	25943.1								region	WEU	DEG-rs	12.1637	32156.3
	region	EAF	SHO-rs	45.1542	25943.1								region	WEU	DEG-rs	12.1637	32164.6
	region	WCA	SHO-rs	45.1542	25943.1								region	EEU	DEG-rs	12.1637	32164.6
	region	WCA	SHO-rs	45.1542	25966.9								region	EEU	DEG-rs	12.1637	32173
	region	SAF	SHO-rs	45.1542	25966.9								region	EAF	DEG-rs	12.1637	32173
	region	SAF	SHO-rs	45.1542	25966.9								region	EAF	DEG-rs	12.1637	32181.4
	region	CHN	SHO-rs	45.1542	25966.9								region	WCA	DEG-rs	12.1637	32181.4
	region	CHN	SHO-rs	45.1542	25970.2								region	WCA	DEG-rs	12.1637	32206.5
	region	OEA	SHO-rs	45.1542	25970.2								region	SAF	DEG-rs	12.1637	32206.5
	region	OEA	SHO-rs	45.1542	25970.3								region	SAF	DEG-rs	12.1637	32214.9
	region	OCN	SHO-rs	45.1542	25970.3								region	CHN	DEG-rs	12.1637	32214.9
	region	OCN	SHO-rs	45.1542	25977.8								region	CHN	DEG-rs	12.1637	32223.3
	region	PAS	SHO-rs	45.1542	25977.8								region	OEA	DEG-rs	12.1637	32223.3
	region	PAS	SHO-rs	45.1542	25979.8								region	OEA	DEG-rs	12.1637	32224.9
	region	LAC	SHO-rs	45.1542	25979.8								region	IND	DEG-rs	12.1637	32224.9
	region	LAC	SHO-rs	45.1542	25994.5								region	IND	DEG-rs	12.1637	32233.3
	region	USA	EHO-rs	53.6214	25994.5								region	OSA	DEG-rs	12.1637	32233.3
	region	USA	EHO-rs	53.6214	26399.4								region	OSA	DEG-rs	12.1637	32250.1
	region	CAN	EHO-rs	53.6214	26399.4								region	OCN	DEG-rs	12.1637	32250.1
	region	CAN	EHO-rs	53.6214	26450.2								region	OCN	DEG-rs	12.1637	32258.5
	region	WEU	EHO-rs	53.6214	26450.2								region	PAS	DEG-rs	12.1637	32258.5
	region	WEU	EHO-rs	53.6214	26453.1								region	PAS	DEG-rs	12.1637	32266.8
	region	EEU	EHO-rs	53.6214	26453.1								region	LAC	DEG-rs	12.1637	32266.8
	region	EEU	EHO-rs	53.6214	26453.1								region	LAC	DEG-rs	12.1637	32292
	region	CHN	EHO-rs	53.6214	26453.1								region	USA	SHG-rs	12.6367	32292
	region	CHN	EHO-rs	53.6214	26476.3								region	USA	SHG-rs	12.6367	32476.4
	region	OEA	EHO-rs	53.6214	26476.3								region	CAN	SHG-rs	12.6367	32476.4
	region	OEA	EHO-rs	53.6214	26482.2								region	CAN	SHG-rs	12.6367	32526.6
	region	IND	EHO-rs	53.6214	26482.2								region	WEU	SHG-rs	12.6367	32526.6
	region	IND	EHO-rs	53.6214	26483.8								region	WEU	SHG-rs	12.6367	32568.2
	region	LAC	EHO-rs	53.6214	26483.8								region	EEU	SHG-rs	12.6367	32568.2
	region	LAC	EHO-rs	53.6214	26484.1								region	EEU	SHG-rs	12.6367	32577
	region	USA	TAO-rs	53.6214	26484.1								region	EAF	SHG-rs	12.6367	32577
	region	USA	TAO-rs	53.6214	26500.8								region	EAF	SHG-rs	12.6367	32585.3
	region	CAN	TAO-rs	53.6214	26500.8								region	WCA	SHG-rs	12.6367	32585.3
	region	CAN	TAO-rs	53.6214	26654.9								region	WCA	SHG-rs	12.6367	32618.9
	region	WEU	TAO-rs	53.6214	26654.9								region	SAF	SHG-rs	12.6367	32618.9
	region	WEU	TAO-rs	53.6214	26655.3								region	SAF	SHG-rs	12.6367	32717.1
	region	EEU	TAO-rs	53.6214	26655.3								region	CHN	SHG-rs	12.6367	32717.1
	region	EEU	TAO-rs	53.6214	26655.5								region	CHN	SHG-rs	12.6367	33002.9
	region	EAF	TAO-rs	53.6214	26655.5								region	OEA	SHG-rs	12.6367	33002.9
	region	EAF	TAO-rs	53.6214	26655.8								region	OEA	SHG-rs	12.6367	33011.3
	region	WCA	TAO-rs	53.6214	26655.8								region	IND	SHG-rs	12.6367	33011.3
	region	WCA	TAO-rs	53.6214	26656.6								region	IND	SHG-rs	12.6367	33019.6
	region	SAF	TAO-rs	53.6214	26656.6								region	OSA	SHG-rs	12.6367	33019.6
	region	SAF	TAO-rs	53.6214	26657.2								region	OSA	SHG-rs	12.6367	33044.8
	region	CHN	TAO-rs	53.6214	26657.2								region	OCN	SHG-rs	12.6367	33044.8
	region	CHN	TAO-rs	53.6214	26657.4								region	OCN	SHG-rs	12.6367	33105.3
	region	PAS	TAO-rs	53.6214	26657.4								region	PAS	SHG-rs	12.6367	33105.3
	region	PAS	TAO-rs	53.6214	26658								region	PAS	SHG-rs	12.6367	33113.6
	region	LAC	TAO-rs	53.6214	26658								region	LAC	SHG-rs	12.6367	33113.6
	region	LAC	TAO-rs	53.6214	27208.1								region	LAC	SHG-rs	12.6367	33532.5
	region	USA	SHO-rs	53.6214	27208.1								region	NAF	COG-rs	12.94	33532.5
	region	USA	SHO-rs	53.6214	28333.1								region	NAF	COG-rs	12.94	33549.9
	region	CAN	SHO-rs	53.6214	28333.1								region	FSU	TIG-rs	13.5152	33549.9
	region	CAN	SHO-rs	53.6214	28334.9								region	FSU	TIG-rs	13.5152	33579.2
	region	WEU	SHO-rs	53.6214	28334.9								region	NAF	TIG-rs	13.5152	33579.2
	region	WEU	SHO-rs	53.6214	28402.2								region	NAF	TIG-rs	13.5152	33587.6
	region	EEU	SHO-rs	53.6214	28402.2								region	MEE	TIG-rs	13.5152	33587.6
	region	EEU	SHO-rs	53.6214	28402.6								region	MEE	TIG-rs	13.5152	33604.4
	region	EAF	SHO-rs	53.6214	28402.6								region	FSU	SHG-rs	13.9882	33604.4
	region	EAF	SHO-rs	53.6214	28402.6								region	FSU	SHG-rs	13.9882	33628.7
	region	WCA	SHO-rs	53.6214	28402.6								region	NAF	SHG-rs	13.9882	33628.7
	region	WCA	SHO-rs	53.6214	28450.1								region	NAF	SHG-rs	13.9882	33638.4
	region	SAF	SHO-rs	53.6214	28450.1								region	MEE	SHG-rs	13.9882	33638.4
	region	SAF	SHO-rs	53.6214	28450.1								region	MEE	SHG-rs	13.9882	33640.1
	region	CHN	SHO-rs	53.6214	28450.1								region	USA	CMG-rs	14.2024	33640.1
	region	CHN	SHO-rs	53.6214	28459.6								region	USA	CMG-rs	14.2024	33707.1
	region	OEA	SHO-rs	53.6214	28459.6								region	CAN	CMG-rs	14.2024	33707.1
	region	OEA	SHO-rs	53.6214	28459.8								region	CAN	CMG-rs	14.2024	33729.5
	region	OCN	SHO-rs	53.6214	28459.8								region	WEU	CMG-rs	14.2024	33729.5
	region	OCN	SHO-rs	53.6214	28478.6								region	WEU	CMG-rs	14.2024	33751.9
	region	PAS	SHO-rs	53.6214	28478.6								region	EEU	CMG-rs	14.2024	33751.9
	region	PAS	SHO-rs	53.6214	28482.6								region	EEU	CMG-rs	14.2024	33759.3
	region	LAC	SHO-rs	53.6214	28482.6								region	EAF	CMG-rs	14.2024	33759.3
	region	LAC	SHO-rs	53.6214	28521.7								region	EAF	CMG-rs	14.2024	33766.7
	region	FSU	EHO-rs	53.9474	28521.7								region	WCA	CMG-rs	14.2024	33766.7
	region	FSU	EHO-rs	53.9474	28521.9								region	WCA	CMG-rs	14.2024	33774.2
	region	NAF	EHO-rs	53.9474	28521.9								region	SAF	CMG-rs	14.2024	33774.2
	region	NAF	EHO-rs	53.9474	28522.1								region	SAF	CMG-rs	14.2024	33781.6
	region	MEE	EHO-rs	53.9474	28522.1								region	CHN	CMG-rs	14.2024	33781.6
	region	MEE	EHO-rs	53.9474	28610.2								region	CHN	CMG-rs	14.2024	33841.2
	region	FSU	TAO-rs	53.9474	28610.2								region	OEA	CMG-rs	14.2024	33841.2
	region	FSU	TAO-rs	53.9474	28791.8								region	OEA	CMG-rs	14.2024	33842.7
	region	FSU	SHO-rs	53.9474	28791.8								region	IND	CMG-rs	14.2024	33842.7
	region	FSU	SHO-rs	53.9474	28838.7								region	IND	CMG-rs	14.2024	33865.1
	region	NAF	SHO-rs	53.9474	28838.7								region	OSA	CMG-rs	14.2024	33865.1
	region	NAF	SHO-rs	53.9474	28843.2								region	OSA	CMG-rs	14.2024	33869.5
	region	MEE	SHO-rs	53.9474	28843.2								region	JPN	CMG-rs	14.2024	33869.5
	region	MEE	SHO-rs	53.9474	28849								region	JPN	CMG-rs	14.2024	33874
	region	FSU	EHO-rs	65.7895	28849								region	OCN	CMG-rs	14.2024	33874
	region	FSU	EHO-rs	65.7895	28849.3								region	OCN	CMG-rs	14.2024	33888.9
	region	NAF	EHO-rs	65.7895	28849.3								region	PAS	CMG-rs	14.2024	33888.9
	region	NAF	EHO-rs	65.7895	28849.7								region	PAS	CMG-rs	14.2024	33893.4
	region	MEE	EHO-rs	65.7895	28849.7								region	LAC	CMG-rs	14.2024	33893.4
	region	MEE	EHO-rs	65.7895	28937.7								region	LAC	CMG-rs	14.2024	33915.8
	region	FSU	TAO-rs	65.7895	28937.7								region	USA	TIG-rs	14.2024	33915.8
	region	FSU	TAO-rs	65.7895	29119.3								region	USA	TIG-rs	14.2024	33972.4
	region	FSU	SHO-rs	65.7895	29119.3								region	CAN	TIG-rs	14.2024	33972.4
	region	FSU	SHO-rs	65.7895	29166.2								region	CAN	TIG-rs	14.2024	34005.2
	region	NAF	SHO-rs	65.7895	29166.2								region	WEU	TIG-rs	14.2024	34005.2
	region	NAF	SHO-rs	65.7895	29175.2								region	WEU	TIG-rs	14.2024	34012.7
	region	MEE	SHO-rs	65.7895	29175.2								region	EEU	TIG-rs	14.2024	34012.7
	region	MEE	SHO-rs	65.7895	29181								region	EEU	TIG-rs	14.2024	34020.1
	region	FSU	EHO-rs	78.6184	29181								region	EAF	TIG-rs	14.2024	34020.1
	region	FSU	EHO-rs	78.6184	29181.6								region	EAF	TIG-rs	14.2024	34027.5
	region	NAF	EHO-rs	78.6184	29181.6								region	WCA	TIG-rs	14.2024	34027.5
	region	NAF	EHO-rs	78.6184	29182.9								region	WCA	TIG-rs	14.2024	34049.9
	region	MEE	EHO-rs	78.6184	29182.9								region	SAF	TIG-rs	14.2024	34049.9
	region	MEE	EHO-rs	78.6184	29315								region	SAF	TIG-rs	14.2024	34057.3
	region	FSU	TAO-rs	78.6184	29315								region	CHN	TIG-rs	14.2024	34057.3
	region	FSU	TAO-rs	78.6184	29678.2								region	CHN	TIG-rs	14.2024	34064.8
	region	FSU	SHO-rs	78.6184	29678.2								region	OEA	TIG-rs	14.2024	34064.8
	region	FSU	SHO-rs	78.6184	29772								region	OEA	TIG-rs	14.2024	34072.2
	region	NAF	SHO-rs	78.6184	29772								region	IND	TIG-rs	14.2024	34072.2
	region	NAF	SHO-rs	78.6184	29803.5								region	IND	TIG-rs	14.2024	34079.7
	region	MEE	SHO-rs	78.6184	29803.5								region	OSA	TIG-rs	14.2024	34079.7
	region	MEE	SHO-rs	78.6184	29812.3								region	OSA	TIG-rs	14.2024	34094.6
													region	OCN	TIG-rs	14.2024	34094.6
													region	OCN	TIG-rs	14.2024	34102
													region	PAS	TIG-rs	14.2024	34102
													region	PAS	TIG-rs	14.2024	34116.9
													region	LAC	TIG-rs	14.2024	34116.9
													region	LAC	TIG-rs	14.2024	34139.3
													region	FSU	CMG-rs	14.2601	34139.3
													region	FSU	CMG-rs	14.2601	34160.3
													region	NAF	CMG-rs	14.2601	34160.3
													region	NAF	CMG-rs	14.2601	34164.5
													region	MEE	CMG-rs	14.2601	34164.5
													region	MEE	CMG-rs	14.2601	34166.6
													region	USA	DEG-rs	14.6676	34166.6
													region	USA	DEG-rs	14.6676	34242
													region	CAN	DEG-rs	14.6676	34242
													region	CAN	DEG-rs	14.6676	34258.8
													region	WEU	DEG-rs	14.6676	34258.8
													region	WEU	DEG-rs	14.6676	34267.2
													region	EEU	DEG-rs	14.6676	34267.2
													region	EEU	DEG-rs	14.6676	34275.5
													region	EAF	DEG-rs	14.6676	34275.5
													region	EAF	DEG-rs	14.6676	34283.9
													region	WCA	DEG-rs	14.6676	34283.9
													region	WCA	DEG-rs	14.6676	34309.1
													region	SAF	DEG-rs	14.6676	34309.1
													region	SAF	DEG-rs	14.6676	34317.4
													region	CHN	DEG-rs	14.6676	34317.4
													region	CHN	DEG-rs	14.6676	34325.8
													region	OEA	DEG-rs	14.6676	34325.8
													region	OEA	DEG-rs	14.6676	34327.5
													region	IND	DEG-rs	14.6676	34327.5
													region	IND	DEG-rs	14.6676	34335.8
													region	OSA	DEG-rs	14.6676	34335.8
													region	OSA	DEG-rs	14.6676	34352.6
													region	OCN	DEG-rs	14.6676	34352.6
													region	OCN	DEG-rs	14.6676	34361
													region	PAS	DEG-rs	14.6676	34361
													region	PAS	DEG-rs	14.6676	34369.4
													region	LAC	DEG-rs	14.6676	34369.4
													region	LAC	DEG-rs	14.6676	34394.5
													region	USA	SHG-rs	15.238	34394.5
													region	USA	SHG-rs	15.238	34578.9
													region	CAN	SHG-rs	15.238	34578.9
													region	CAN	SHG-rs	15.238	34629.2
													region	WEU	SHG-rs	15.238	34629.2
													region	WEU	SHG-rs	15.238	34670.7
													region	EEU	SHG-rs	15.238	34670.7
													region	EEU	SHG-rs	15.238	34679.5
													region	EAF	SHG-rs	15.238	34679.5
													region	EAF	SHG-rs	15.238	34687.9
													region	WCA	SHG-rs	15.238	34687.9
													region	WCA	SHG-rs	15.238	34721.4
													region	SAF	SHG-rs	15.238	34721.4
													region	SAF	SHG-rs	15.238	34819.6
													region	CHN	SHG-rs	15.238	34819.6
													region	CHN	SHG-rs	15.238	35105.4
													region	OEA	SHG-rs	15.238	35105.4
													region	OEA	SHG-rs	15.238	35113.8
													region	IND	SHG-rs	15.238	35113.8
													region	IND	SHG-rs	15.238	35122.2
													region	OSA	SHG-rs	15.238	35122.2
													region	OSA	SHG-rs	15.238	35147.3
													region	OCN	SHG-rs	15.238	35147.3
													region	OCN	SHG-rs	15.238	35207.8
													region	PAS	SHG-rs	15.238	35207.8
													region	PAS	SHG-rs	15.238	35216.2
													region	LAC	SHG-rs	15.238	35216.2
													region	LAC	SHG-rs	15.238	35635.1
													region	FSU	TIG-rs	16.2973	35635.1
													region	FSU	TIG-rs	16.2973	35664.4
													region	NAF	TIG-rs	16.2973	35664.4
													region	NAF	TIG-rs	16.2973	35672.8
													region	MEE	TIG-rs	16.2973	35672.8
													region	MEE	TIG-rs	16.2973	35689.6
													region	USA	CMG-rs	16.5168	35689.6
													region	USA	CMG-rs	16.5168	35739.9
													region	CAN	CMG-rs	16.5168	35739.9
													region	CAN	CMG-rs	16.5168	35756.7
													region	WEU	CMG-rs	16.5168	35756.7
													region	WEU	CMG-rs	16.5168	35773.4
													region	EEU	CMG-rs	16.5168	35773.4
													region	EEU	CMG-rs	16.5168	35779
													region	EAF	CMG-rs	16.5168	35779
													region	EAF	CMG-rs	16.5168	35784.6
													region	WCA	CMG-rs	16.5168	35784.6
													region	WCA	CMG-rs	16.5168	35790.2
													region	SAF	CMG-rs	16.5168	35790.2
													region	SAF	CMG-rs	16.5168	35795.7
													region	CHN	CMG-rs	16.5168	35795.7
													region	CHN	CMG-rs	16.5168	35840.4
													region	OEA	CMG-rs	16.5168	35840.4
													region	OEA	CMG-rs	16.5168	35841.6
													region	IND	CMG-rs	16.5168	35841.6
													region	IND	CMG-rs	16.5168	35858.3
													region	OSA	CMG-rs	16.5168	35858.3
													region	OSA	CMG-rs	16.5168	35861.7
													region	JPN	CMG-rs	16.5168	35861.7
													region	JPN	CMG-rs	16.5168	35865
													region	OCN	CMG-rs	16.5168	35865
													region	OCN	CMG-rs	16.5168	35876.2
													region	PAS	CMG-rs	16.5168	35876.2
													region	PAS	CMG-rs	16.5168	35879.6
													region	LAC	CMG-rs	16.5168	35879.6
													region	LAC	CMG-rs	16.5168	35896.4
													region	USA	TIG-rs	16.5168	35896.4
													region	USA	TIG-rs	16.5168	35938.8
													region	CAN	TIG-rs	16.5168	35938.8
													region	CAN	TIG-rs	16.5168	35963.4
													region	WEU	TIG-rs	16.5168	35963.4
													region	WEU	TIG-rs	16.5168	35969
													region	EEU	TIG-rs	16.5168	35969
													region	EEU	TIG-rs	16.5168	35974.6
													region	EAF	TIG-rs	16.5168	35974.6
													region	EAF	TIG-rs	16.5168	35980.2
													region	WCA	TIG-rs	16.5168	35980.2
													region	WCA	TIG-rs	16.5168	35997
													region	SAF	TIG-rs	16.5168	35997
													region	SAF	TIG-rs	16.5168	36002.5
													region	CHN	TIG-rs	16.5168	36002.5
													region	CHN	TIG-rs	16.5168	36008.1
													region	OEA	TIG-rs	16.5168	36008.1
													region	OEA	TIG-rs	16.5168	36013.7
													region	IND	TIG-rs	16.5168	36013.7
													region	IND	TIG-rs	16.5168	36019.3
													region	OSA	TIG-rs	16.5168	36019.3
													region	OSA	TIG-rs	16.5168	36030.5
													region	OCN	TIG-rs	16.5168	36030.5
													region	OCN	TIG-rs	16.5168	36036
													region	PAS	TIG-rs	16.5168	36036
													region	PAS	TIG-rs	16.5168	36047.2
													region	LAC	TIG-rs	16.5168	36047.2
													region	LAC	TIG-rs	16.5168	36064
													region	FSU	SHG-rs	16.8677	36064
													region	FSU	SHG-rs	16.8677	36088.3
													region	NAF	SHG-rs	16.8677	36088.3
													region	NAF	SHG-rs	16.8677	36098
													region	MEE	SHG-rs	16.8677	36098
													region	MEE	SHG-rs	16.8677	36099.7
													region	FSU	CMG-rs	16.9379	36099.7
													region	FSU	CMG-rs	16.9379	36118.3
													region	NAF	CMG-rs	16.9379	36118.3
													region	NAF	CMG-rs	16.9379	36122.1
													region	MEE	CMG-rs	16.9379	36122.1
													region	MEE	CMG-rs	16.9379	36123.9
													region	USA	DEG-rs	17.4218	36123.9
													region	USA	DEG-rs	17.4218	36191
													region	CAN	DEG-rs	17.4218	36191
													region	CAN	DEG-rs	17.4218	36205.9
													region	WEU	DEG-rs	17.4218	36205.9
													region	WEU	DEG-rs	17.4218	36213.4
													region	EEU	DEG-rs	17.4218	36213.4
													region	EEU	DEG-rs	17.4218	36220.8
													region	EAF	DEG-rs	17.4218	36220.8
													region	EAF	DEG-rs	17.4218	36228.2
													region	WCA	DEG-rs	17.4218	36228.2
													region	WCA	DEG-rs	17.4218	36250.6
													region	SAF	DEG-rs	17.4218	36250.6
													region	SAF	DEG-rs	17.4218	36258
													region	CHN	DEG-rs	17.4218	36258
													region	CHN	DEG-rs	17.4218	36265.5
													region	OEA	DEG-rs	17.4218	36265.5
													region	OEA	DEG-rs	17.4218	36267
													region	IND	DEG-rs	17.4218	36267
													region	IND	DEG-rs	17.4218	36274.4
													region	OSA	DEG-rs	17.4218	36274.4
													region	OSA	DEG-rs	17.4218	36289.3
													region	OCN	DEG-rs	17.4218	36289.3
													region	OCN	DEG-rs	17.4218	36296.8
													region	PAS	DEG-rs	17.4218	36296.8
													region	PAS	DEG-rs	17.4218	36304.2
													region	LAC	DEG-rs	17.4218	36304.2
													region	LAC	DEG-rs	17.4218	36326.6
													region	USA	SHG-rs	18.0993	36326.6
													region	USA	SHG-rs	18.0993	36490.5
													region	CAN	SHG-rs	18.0993	36490.5
													region	CAN	SHG-rs	18.0993	36535.1
													region	WEU	SHG-rs	18.0993	36535.1
													region	WEU	SHG-rs	18.0993	36572
													region	EEU	SHG-rs	18.0993	36572
													region	EEU	SHG-rs	18.0993	36579.9
													region	EAF	SHG-rs	18.0993	36579.9
													region	EAF	SHG-rs	18.0993	36587.3
													region	WCA	SHG-rs	18.0993	36587.3
													region	WCA	SHG-rs	18.0993	36617.1
													region	SAF	SHG-rs	18.0993	36617.1
													region	SAF	SHG-rs	18.0993	36704.4
													region	CHN	SHG-rs	18.0993	36704.4
													region	CHN	SHG-rs	18.0993	36958.5
													region	OEA	SHG-rs	18.0993	36958.5
													region	OEA	SHG-rs	18.0993	36965.9
													region	IND	SHG-rs	18.0993	36965.9
													region	IND	SHG-rs	18.0993	36973.3
													region	OSA	SHG-rs	18.0993	36973.3
													region	OSA	SHG-rs	18.0993	36995.7
													region	OCN	SHG-rs	18.0993	36995.7
													region	OCN	SHG-rs	18.0993	37049.5
													region	PAS	SHG-rs	18.0993	37049.5
													region	PAS	SHG-rs	18.0993	37056.9
													region	LAC	SHG-rs	18.0993	37056.9
													region	LAC	SHG-rs	18.0993	37429.3
													region	FSU	TIG-rs	19.3576	37429.3
													region	FSU	TIG-rs	19.3576	37455.3
													region	NAF	TIG-rs	19.3576	37455.3
													region	NAF	TIG-rs	19.3576	37462.8
													region	MEE	TIG-rs	19.3576	37462.8
													region	MEE	TIG-rs	19.3576	37477.7
													region	FSU	CMG-rs	19.8834	37477.7
													region	FSU	CMG-rs	19.8834	37496.3
													region	NAF	CMG-rs	19.8834	37496.3
													region	NAF	CMG-rs	19.8834	37500.1
													region	MEE	CMG-rs	19.8834	37500.1
													region	MEE	CMG-rs	19.8834	37501.9
													region	FSU	SHG-rs	20.0351	37501.9
													region	FSU	SHG-rs	20.0351	37523.5
													region	NAF	SHG-rs	20.0351	37523.5
													region	NAF	SHG-rs	20.0351	37532.2
													region	MEE	SHG-rs	20.0351	37532.2
													region	MEE	SHG-rs	20.0351	37533.6
													region	USA	DEG-rs	20.4515	37533.6
													region	USA	DEG-rs	20.4515	37600.7
													region	CAN	DEG-rs	20.4515	37600.7
													region	CAN	DEG-rs	20.4515	37615.6
													region	WEU	DEG-rs	20.4515	37615.6
													region	WEU	DEG-rs	20.4515	37623.1
													region	EEU	DEG-rs	20.4515	37623.1
													region	EEU	DEG-rs	20.4515	37630.5
													region	EAF	DEG-rs	20.4515	37630.5
													region	EAF	DEG-rs	20.4515	37638
													region	WCA	DEG-rs	20.4515	37638
													region	WCA	DEG-rs	20.4515	37660.3
													region	SAF	DEG-rs	20.4515	37660.3
													region	SAF	DEG-rs	20.4515	37667.8
													region	CHN	DEG-rs	20.4515	37667.8
													region	CHN	DEG-rs	20.4515	37675.2
													region	OEA	DEG-rs	20.4515	37675.2
													region	OEA	DEG-rs	20.4515	37676.7
													region	IND	DEG-rs	20.4515	37676.7
													region	IND	DEG-rs	20.4515	37684.1
													region	OSA	DEG-rs	20.4515	37684.1
													region	OSA	DEG-rs	20.4515	37699
													region	OCN	DEG-rs	20.4515	37699
													region	OCN	DEG-rs	20.4515	37706.5
													region	PAS	DEG-rs	20.4515	37706.5
													region	PAS	DEG-rs	20.4515	37713.9
													region	LAC	DEG-rs	20.4515	37713.9
													region	LAC	DEG-rs	20.4515	37736.3
													region	USA	SHG-rs	21.2468	37736.3
													region	USA	SHG-rs	21.2468	37900.2
													region	CAN	SHG-rs	21.2468	37900.2
													region	CAN	SHG-rs	21.2468	37944.9
													region	WEU	SHG-rs	21.2468	37944.9
													region	WEU	SHG-rs	21.2468	37981.8
													region	EEU	SHG-rs	21.2468	37981.8
													region	EEU	SHG-rs	21.2468	37989.6
													region	EAF	SHG-rs	21.2468	37989.6
													region	EAF	SHG-rs	21.2468	37997
													region	WCA	SHG-rs	21.2468	37997
													region	WCA	SHG-rs	21.2468	38026.8
													region	SAF	SHG-rs	21.2468	38026.8
													region	SAF	SHG-rs	21.2468	38114.2
													region	CHN	SHG-rs	21.2468	38114.2
													region	CHN	SHG-rs	21.2468	38368.2
													region	OEA	SHG-rs	21.2468	38368.2
													region	OEA	SHG-rs	21.2468	38375.6
													region	IND	SHG-rs	21.2468	38375.6
													region	IND	SHG-rs	21.2468	38383.1
													region	OSA	SHG-rs	21.2468	38383.1
													region	OSA	SHG-rs	21.2468	38405.4
													region	OCN	SHG-rs	21.2468	38405.4
													region	OCN	SHG-rs	21.2468	38459.2
													region	PAS	SHG-rs	21.2468	38459.2
													region	PAS	SHG-rs	21.2468	38466.6
													region	LAC	SHG-rs	21.2468	38466.6
													region	LAC	SHG-rs	21.2468	38839
													region	FSU	TIG-rs	22.7239	38839
													region	FSU	TIG-rs	22.7239	38865.1
													region	NAF	TIG-rs	22.7239	38865.1
													region	NAF	TIG-rs	22.7239	38872.5
													region	MEE	TIG-rs	22.7239	38872.5
													region	MEE	TIG-rs	22.7239	38887.4
													region	FSU	CMG-rs	23.1235	38887.4
													region	FSU	CMG-rs	23.1235	38901.4
													region	NAF	CMG-rs	23.1235	38901.4
													region	NAF	CMG-rs	23.1235	38904.2
													region	MEE	CMG-rs	23.1235	38904.2
													region	MEE	CMG-rs	23.1235	38905.6
													region	FSU	SHG-rs	23.5192	38905.6
													region	FSU	SHG-rs	23.5192	38927.2
													region	NAF	SHG-rs	23.5192	38927.2
													region	NAF	SHG-rs	23.5192	38935.8
													region	MEE	SHG-rs	23.5192	38935.8
													region	MEE	SHG-rs	23.5192	38937.3
													region	USA	DEG-rs	23.7841	38937.3
													region	USA	DEG-rs	23.7841	38987.6
													region	CAN	DEG-rs	23.7841	38987.6
													region	CAN	DEG-rs	23.7841	38998.8
													region	WEU	DEG-rs	23.7841	38998.8
													region	WEU	DEG-rs	23.7841	39004.4
													region	EEU	DEG-rs	23.7841	39004.4
													region	EEU	DEG-rs	23.7841	39010
													region	EAF	DEG-rs	23.7841	39010
													region	EAF	DEG-rs	23.7841	39015.6
													region	WCA	DEG-rs	23.7841	39015.6
													region	WCA	DEG-rs	23.7841	39032.3
													region	SAF	DEG-rs	23.7841	39032.3
													region	SAF	DEG-rs	23.7841	39037.9
													region	CHN	DEG-rs	23.7841	39037.9
													region	CHN	DEG-rs	23.7841	39043.5
													region	OEA	DEG-rs	23.7841	39043.5
													region	OEA	DEG-rs	23.7841	39044.6
													region	IND	DEG-rs	23.7841	39044.6
													region	IND	DEG-rs	23.7841	39050.2
													region	OSA	DEG-rs	23.7841	39050.2
													region	OSA	DEG-rs	23.7841	39061.4
													region	OCN	DEG-rs	23.7841	39061.4
													region	OCN	DEG-rs	23.7841	39067
													region	PAS	DEG-rs	23.7841	39067
													region	PAS	DEG-rs	23.7841	39072.5
													region	LAC	DEG-rs	23.7841	39072.5
													region	LAC	DEG-rs	23.7841	39089.3
													region	USA	SHG-rs	24.7091	39089.3
													region	USA	SHG-rs	24.7091	39212.2
													region	CAN	SHG-rs	24.7091	39212.2
													region	CAN	SHG-rs	24.7091	39245.7
													region	WEU	SHG-rs	24.7091	39245.7
													region	WEU	SHG-rs	24.7091	39273.4
													region	EEU	SHG-rs	24.7091	39273.4
													region	EEU	SHG-rs	24.7091	39279.3
													region	EAF	SHG-rs	24.7091	39279.3
													region	EAF	SHG-rs	24.7091	39284.9
													region	WCA	SHG-rs	24.7091	39284.9
													region	WCA	SHG-rs	24.7091	39307.2
													region	SAF	SHG-rs	24.7091	39307.2
													region	SAF	SHG-rs	24.7091	39372.7
													region	CHN	SHG-rs	24.7091	39372.7
													region	CHN	SHG-rs	24.7091	39563.2
													region	OEA	SHG-rs	24.7091	39563.2
													region	OEA	SHG-rs	24.7091	39568.8
													region	IND	SHG-rs	24.7091	39568.8
													region	IND	SHG-rs	24.7091	39574.4
													region	OSA	SHG-rs	24.7091	39574.4
													region	OSA	SHG-rs	24.7091	39591.2
													region	OCN	SHG-rs	24.7091	39591.2
													region	OCN	SHG-rs	24.7091	39631.5
													region	PAS	SHG-rs	24.7091	39631.5
													region	PAS	SHG-rs	24.7091	39637.1
													region	LAC	SHG-rs	24.7091	39637.1
													region	LAC	SHG-rs	24.7091	39916.3
													region	FSU	TIG-rs	26.4268	39916.3
													region	FSU	TIG-rs	26.4268	39935.9
													region	NAF	TIG-rs	26.4268	39935.9
													region	NAF	TIG-rs	26.4268	39941.5
													region	MEE	TIG-rs	26.4268	39941.5
													region	MEE	TIG-rs	26.4268	39952.7
													region	FSU	SHG-rs	27.3518	39952.7
													region	FSU	SHG-rs	27.3518	39968.9
													region	NAF	SHG-rs	27.3518	39968.9
													region	NAF	SHG-rs	27.3518	39975.3
													region	MEE	SHG-rs	27.3518	39975.3
													region	MEE	SHG-rs	27.3518	39976.5

## Sheet: 2. Oil data summary (vs SSP2)
	Reservoir type	Reserves/ Resources	Quantity		Cost
			Value (EJ)	Assumption	Value ($US/GJ)	Assumption
OIL	Conventional oil	Reserves	6741	Sources: BGR, USGS	1.74 – 12.93	Exp. (x 2, x 4) - Imp. (x 2.52)
		Resources	4555	Sources: BGR, USGS	1.74 – 19.13	Exp. (x 2, x 4) - Imp. (x 2.52)
	Sub-total		11296		1.74 – 19.13
	Oil sands	Reserves	1686 (-13%)	RR: E 70%, I 100%	6.94 – 21.05	Exp. (x 3) - Imp. ((+5)x 1.98)
		Resources	8026 (-12%)	RR: E 20%, I 33%	17.36 – 78.62	Exp. (x 3) - Imp. ((+5)x 1.98)
	Heavy and Extra-heavy oil	Reserves	343 (0%)	RR: E 70%, I 100%	6.94 – 21.05	Exp. (x 3) - Imp. ((+5)x 1.98)
		Resources	2974 (+6%)	RR: E 20%, I 30%	17.36 – 78.62	Exp. (x 3) - Imp. ((+5)x 1.98)
	Shale oil	Reserves	1471 (-1%)	RR: E 70%, I 100%	6.94 – 21.05	Exp. (x 3) - Imp. ((+5)x 1.98)
		Resources	7874 (+5%)	RR: E 20%, I 50%	17.36 – 78.62	Exp. (x 3) - Imp. ((+5)x 1.98)
	Sub-total		22374 (+5%)		6.94 – 78.62
	Total		33670 (+3%)		1.74 – 78.62
	LEGEND
	E, Exp.	Exporters
	I, Imp.	Importers
	RR	Recovery rate

## Sheet: 3. Gas data summary (vs SSP2)
	Reservoir type	Reserves/ Resources	Quantity		Cost
			Value (EJ)	Assumption	Value ($US/GJ)	Assumption
GAS	Conventional gas	Reserves	6284 (-12%)	RR: E 15%	0.70 – 8.89	Exp. (x 2, x 4) - Imp. (x 2.52)
		Resources	7988 (-18%)	RR: E 30%	0.70 – 12.94	Exp. (x 2, x 4) - Imp. (x 2.52)
	Sub-total		14271 (-15%)		0.70 – 12.94
	CBM	Reserves	3579 (+10%)	RR: E 50%, I 100%	3.45 – 8.32	Exp. (x 1.5) - Imp. (x 1.15)
		Resources	1500 (+15%)	RR: E 5%, I 20%	8.45 – 23.12	Exp. (x 1.75) - Imp. (x 1.25)
	Deep gas	Reserves	3189 (+57%)	RR: E 50%, I 100%	4.50 – 11.10	Exp. (x 2) - Imp. (x 1.5)
		Resources	1013 (+529%)	RR: E 0%, I 20%	12.16 - 23.78	Exp. (x 1) - Imp. (x 1.8)
	Tight gas	Reserves	5170 (+13%)	RR: E 70%, I 100%	3.45 – 7.49	Exp. (x 1.35) - Imp. (x 1.15)
		Resources	1360 (+21%)	RR: E 10%, I 20%	8.45 – 26.43	Exp. (x 2) - Imp. (x 1.25)
	Shale gas	Reserves	4223 (+18%)	RR: E 18%, I 100%	4.41 – 8.71	Exp. (x 1.57) - Imp. (x 1.47)
		Resources	5672 (+100%)	I: 0.1 x MAX(GEA, ARI) - E: 0.4 x MAX(GEA,ARI)	12.64 – 27.35	Exp. (x 2.07) - Imp. (x 1.87)
	Hydrates	Reserves	0	-	-	-
		Resources	0	Hard limit	-	-
	Sub-total		25705 (+36%)		3.45 – 27.35
	Total		39976 (+12%)		0.70 – 27.35
	LEGEND
	E, Exp.	Exporters
	I, Imp.	Importers
	RR	Recovery rate

## Sheet: 4. Oil - Resources
	Oil resource data															Assumptions
#		Region code	Conventional		Unconventional											Conventional						Unconventional gas
			oil		oil		Oil sands		Heavy and Extra-heavy oil		Shale oil					oil						Oil sands						Heavy and Extra-heavy oil						Shale oil
			Reserves (EJ)	Resources (EJ)	Reserves (EJ)	Resources (EJ)	Reserves (EJ)	Resources (EJ)	Reserves (EJ)	Resources (EJ)	Reserves (EJ)	Resources (EJ)				Factor	Reserves (EJ)	C	Factor	Resources (EJ)	C	Recovery rate	Reserves (EJ)	C	Recovery rate	Resources (EJ)	C	Recovery rate	Reserves (EJ)	C	Recovery rate	Resources (EJ)	C	Recovery rate	Reserves (EJ)	C	Recovery rate	Resources (EJ)	C
1	importer	USA	162	420	1435.65	7757.9	0	81.5861	66.5701	1363.33	1369.08	6312.98				1	162	1	1	420	1	1	0	3	0.33	247.231	6	1	66.5701	3	0.3	4544.44	6	1	1369.08	3	0.5	12626	6
2	importer	CAN	28	101	1149.32	4206.29	1149.28	3390.28	0.041868	769.953	0	46.0548				1	28	1	1	101	1	1	1149.28	3	0.33	10273.6	6	1	0.041868	3	0.3	2566.51	6	1	0	3	0.5	92.1096	6
3	importer	WEU	88	186	8.20613	292.028	1.38164	1.46454	1.08857	7.28503	5.73592	283.279				1	88	1	1	186	1	1	1.38164	3	0.33	4.43801	6	1	1.08857	3	0.3	24.2834	6	1	5.73592	3	0.5	566.558	6
4	importer	EEU	6	13	0.334944	2.01594	0	0.483575	0.251208	0.150725	0.083736	1.38164				1	6	1	1	13	1	1	0	3	0.33	1.46538	6	1	0.251208	3	0.3	0.502416	6	1	0.083736	3	0.5	2.76329	6
5	exporter	FSU	735	1008	531.464	1906.28	523.698	1513.48	0.61546	2.16039	7.15105	390.645				1	735	1	1	1008	1	0.7	748.139	4	0.2	7567.39	7	0.7	0.879228	4	0.2	10.8019	7	0.7	10.2158	4	0.2	1953.23	7
6	exporter	NAF	388	184	4.6306	78.402	0	0	0.234461	3.18197	4.39614	75.22				1	388	1	1	184	1	0.7	0	4	0.2	0	7	0.7	0.334944	4	0.2	15.9098	7	0.7	6.2802	4	0.2	376.1	7
7	importer	EAF	4	13	1.46538	1.63829	1.46538	1.53362	0	0	0	0.10467				1	4	1	1	13	1	1	1.46538	3	0.33	4.64735	6	1	0	3	0.3	0	6	1	0	3	0.5	0.20934	6
8	importer	WCA	254	302	4.0612	303.793	4.0612	4.22783	0	0	0	299.566				1	254	1	1	302	1	1	4.0612	3	0.33	12.8116	6	1	0	3	0.3	0	6	1	0	3	0.5	599.131	6
9	importer	SAF	77	150	3.09823	3.61698	3.09823	3.21923	0	0	0	0.397746				1	77	1	1	150	1	1	3.09823	3	0.33	9.75524	6	1	0	3	0.3	0	6	1	0	3	0.5	0.795492	6
10	exporter	MEE	4286	889	38.7153	782.228	0	0	0.0293076	733.695	38.686	48.5334				1	4286	1	1	889	1	0.7	0	4	0.2	0	7	0.7	0.041868	4	0.2	3668.47	7	0.7	55.2658	4	0.2	242.667	7
11	importer	CHN	84	97	12.9791	119.343	0	1.22966	4.98229	70.175	7.99679	47.9389				1	84	1	1	97	1	1	0	3	0.33	3.72625	6	1	4.98229	3	0.3	233.917	6	1	7.99679	3	0.5	95.8777	6
12	importer	OEA	26	32	0	18.715	0	0	0	17.8358	0	0.879228				1	26	1	1	32	1	1	0	3	0.33	0	6	1	0	3	0.3	59.4526	6	1	0	3	0.5	1.75846	6
13	importer	IND	33	17	0	5.40097	0	0	0	5.40097	0	0				1	33	1	1	17	1	1	0	3	0.33	0	6	1	0	3	0.3	18.0032	6	1	0	3	0.5	0	6
14	importer	OSA	2	13	0	0	0	0	0	0	0	0				1	2	1	1	13	1	1	0	3	0.33	0	6	1	0	3	0.3	0	6	1	0	3	0.5	0	6
15	importer	JPN	0	0	0	0	0	0	0	0	0	0				1	0	1	1	0	1	1	0	3	0.33	0	6	1	0	3	0.3	0	6	1	0	3	0.5	0	6
16	importer	OCN	24	44	21.6876	94.9148	0	0	0	0	21.6876	94.9148				1	24	1	1	44	1	1	0	3	0.33	0	6	1	0	3	0.3	0	6	1	21.6876	3	0.5	189.83	6
17	importer	PAS	65	88	13.1047	28.2299	2.93076	3.06725	0	0	10.1739	25.1627				1	65	1	1	88	1	1	2.93076	3	0.33	9.2947	6	1	0	3	0.3	0	6	1	10.1739	3	0.5	50.3253	6
18	importer	LAC	479	614	274.528	3273.95	0	3025.8	268.918	1.25604	5.61031	246.896				1	479	1	1	614	1	1	0	3	0.33	9169.09	6	1	268.918	3	0.3	4.1868	6	1	5.61031	3	0.5	493.791	6
19	importer	SOO	0	0	0	0	0	0	0	0	0	0				0.5	0	-	0.5	0	-	0.5	0	5	0.5	0	8	0.5	0	5	0.5	0	8	0.5	0	5	0.5	0	8
20		ARC	0	383.881	0	0	0	0	0	0	0	0				0.5	0	-	0.5	767.761	2	0.5	0	5	0.5	0	8	0.5	0	5	0.5	0	8	0.5	0	5	0.5	0	8
		SUB-TOTAL	6741	4554.88	3499.25	18874.7	1685.91	8026.37	342.731	2974.42	1470.61	7873.96				C stands for comments (see below)
		TOTAL	11295.9		22374
		Grand TOTAL	33669.9													Comments
		Legend														#	Reference	Comment
		Reserves														1	1, 2	Using the most recent BGR data instead of USGS data (as reported in GEA Table 7.6 chap.7 p. 440)
		Resources														2	EJ	Scenario assumption: 50% of Arctic resources available
																3	EJ	Scenario assumption: Recovery rate for unconventional reserves set to 70%
																4	EJ	Scenario assumption: Recovery rate for unconventional resources set to 20%
																References are listed in tab 'References' - Grey cells indicate default GEA assumptions/data - EJ: Expert judgement

## Sheet: 5. Oil - Production costs
	Oil production costs data									Assumptions
#	Reservoir type	Category	Regional distinction	Production costs ($/GJ)		# cost bins				#	Reservoir type	Category	Regional distinction	GEA extraction costs ($/GJ)		# cost bins	Cost multiplier	Cost mark-up ($/GJ)	C
				Min	Max									Min	Max
1	Conventional	Reserves	MEE, FSU	1.74	10.42	4				1	Conventional	Reserves	MEE, FSU	0.87	5.21	4	2	0	1
2		Reserves	NAF	3.48	20.84	4				2		Reserves	NAF	0.87	5.21	4	4	0	2
3		Reserves	rest	2.1924	13.1292	4				3		Reserves	rest	0.87	5.21	4	2.52	0	3
4		Resources	MEE, FSU	1.74	10.42	4				4		Resources	MEE, FSU	0.87	5.21	4	2	0	1
5		Resources	NAF	3.48	20.84	4				5		Resources	NAF	0.87	5.21	4	4	0	2
6		Resources	rest	2.1924	13.1292	4				6		Resources	rest	0.87	5.21	4	2.52	0	3
-	Unconventional	Reserves	MEE, FSU, NAF	7.89	21.06	6				-	Unconventional	Reserves	MEE, FSU, NAF	2.63	7.02	6	-	-
-		Reserves	rest	17.3646	53.6382	6				-		Reserves	rest	2.63	7.02	6	-	-
-		Resources	MEE, FSU, NAF	7.89	21.06	8				-		Resources	MEE, FSU, NAF	7.89	26.21	8	-	-
-		Resources	rest	17.3646	53.6382	8				-		Resources	rest	7.89	26.21	8	-	-
7	Oil sands	Reserves	MEE, FSU, NAF	7.89	21.06	6				7	Oil sands	Reserves	MEE, FSU, NAF	2.63	7.02	6	3	0	4
8		Reserves	rest	6.9498	15.642	6				8		Reserves	rest	2.63	7.02	6	1.98	0.88	5
9		Resources	MEE, FSU, NAF	23.67	78.63	8				9		Resources	MEE, FSU, NAF	7.89	26.21	8	3	0	4
10		Resources	rest	17.3646	53.6382	8				10		Resources	rest	7.89	26.21	8	1.98	0.88	5
11	Heavy and Extra-heavy oil	Reserves	MEE, FSU, NAF	7.89	21.06	6				11	Heavy and Extra-heavy oil	Reserves	MEE, FSU, NAF	2.63	7.02	6	3	0	4
12		Reserves	rest	6.9498	15.642	6				12		Reserves	rest	2.63	7.02	6	1.98	0.88	5
13		Resources	MEE, FSU, NAF	23.67	78.63	8				13		Resources	MEE, FSU, NAF	7.89	26.21	8	3	0	4
14		Resources	rest	17.3646	53.6382	8				14		Resources	rest	7.89	26.21	8	1.98	0.88	5
15	Shale oil	Reserves	MEE, FSU, NAF	7.89	21.06	6				15	Shale oil	Reserves	MEE, FSU, NAF	2.63	7.02	6	3	0	4
16		Reserves	rest	6.9498	15.642	6				16		Reserves	rest	2.63	7.02	6	1.98	0.88	5
17		Resources	MEE, FSU, NAF	23.67	78.63	8				17		Resources	MEE, FSU, NAF	7.89	26.21	8	3	0	4
18		Resources	rest	17.3646	53.6382	8				18		Resources	rest	7.89	26.21	8	1.98	0.88	5
										C stands for comments (see below)
										Comments (references are listed in tab 'References' )
										#	Reference	Comment
										1	11, EJ	Scenario assumption: Increasing costs of conventional reserves by a factor of 2 in the MEE and FSU regions. This cost adjustment reflects the significant cost increase over the past decade as shown by the CERA upstream indices (+13% c/w SSP2)
										2	11, EJ	Scenario assumption: Increasing costs of conventional reserves by a factor of 4 in the NAF region. This cost adjustment reflects the significant cost increase over the past decade as shown by the CERA upstream indices (+126% c/w SSP2)
										3	11, EJ	Scenario assumption: Increasing costs of conventional reserves by a factor of 2.52 in the remaining regions. This cost adjustment reflects the significant cost increase over the past decade as shown by the CERA upstream indices (as in SSP2)
										4	EJ	Scenario assumption: Increasing costs of all unconventionals by a factor of 3 in the MEE, FSU and NAF regions
										5	EJ	Scenario assumption: Increasing costs of all unconventionals by a factor of 1.98 in the remaining regions
										References are listed in tab 'References' - Grey cells indicate default GEA assumptions/data - EJ: Expert judgement

## Sheet: 6. Gas - Resources
	Gas resource data																		Assumptions
#	Region code	Conventional		Unconventional															Conventional						Unconventional gas
		Gas		Gas		Deep Gas		Coal-bed methane		Tight gas		Shale gas		Gas hydrates					Gas						Deep Gas						Coal-bed methane						Tight gas						Shale gas						Gas hydrates
		Reserves (EJ)	Resources (EJ)	Reserves (EJ)	Resources (EJ)	Reserves (EJ)	Resources (EJ)	Reserves (EJ)	Resources (EJ)	Reserves (EJ)	Resources (EJ)	Reserves (EJ)	Resources (EJ)	Reserves (EJ)	Resources (EJ)				Factor	Reserves (EJ)	C	Factor	Resources (EJ)	C	Recovery rate	Reserves (EJ)	C	Recovery rate	Resources (EJ)	C	Recovery rate	Reserves (EJ)	C	Recovery rate	Resources (EJ)	C	Recovery rate	Reserves (EJ)	C	Recovery rate	Resources (EJ)	C	Recovery rate	Reserves (EJ)	C	Recovery rate	Resources (EJ)	C	Recovery rate
1	USA	262	740	4657	1773.6	745	335.4	931	335.4	1118	283.2	1863	819.6	0	0				1	262	1	1	740	1	1	745	3	0.2	1677	5	1	931	3	0.2	1677	5	1	1118	3	0.2	1416	5	1	1863	3	0.2	4098	11	0
2	CAN	65	259	1192	573.74	186	74.6	261	111.8	559	164	186	223.34	0	0				1	65	1	1	259	1	1	186	3	0.2	373	5	1	261	3	0.2	559	5	1	559	3	0.2	820	5	1	186	3	0.598767	373	11	0
3	WEU	162	313	746	370.67	112	37.2	261	111.8	149	37.2	224	184.47	0	0				1	162	1	1	313	1	1	112	3	0.2	186	5	1	261	3	0.2	559	5	1	149	3	0.2	186	5	1	224	3	0.33	559	11	0
4	EEU	31	23	560	150.73	112	37.2	75	37.2	149	37.2	224	39.13	0	0				1	31	1	1	23	1	1	112	3	0.2	186	5	1	75	3	0.2	186	5	1	149	3	0.2	186	5	1	224	3	0.07	559	11	0
5	FSU	1999.2	3032.4	2063.9	331.59	559	0	372.5	93.15	730.1	130.4	402.3	108.04	0	0				0.85	2352	1	0.7	4332	1	0.5	1118	4	0	1863	6	0.5	745	4	0.05	1863	7	0.7	1043	8	0.1	1304	9	0.18	2235	10	0.02	5402	11	0
6	NAF	263.5	226.8	496.42	99.075	186.5	0	74.5	18.65	208.6	37.3	26.82	43.125	0	0				0.85	310	1	0.7	324	1	0.5	373	4	0	559	6	0.5	149	4	0.05	373	7	0.7	298	8	0.1	373	9	0.18	149	10	0.115617	373	11	0
7	EAF	1	22	411	148.8	112	37.2	75	37.2	149	37.2	75	37.2	0	0				1	1	1	1	22	1	1	112	3	0.2	186	5	1	75	3	0.2	186	5	1	149	3	0.2	186	5	1	75	3	0.2	186	11	0
8	WCA	213	183	1081	409.8	261	111.8	75	37.2	447	111.8	298	149	0	0				1	213	1	1	183	1	1	261	3	0.2	559	5	1	75	3	0.2	186	5	1	447	3	0.2	559	5	1	298	3	0.2	745	11	0
9	SAF	21	70	337	548.275	75	37.2	75	37.2	112	37.2	75	436.675	0	0				1	21	1	1	70	1	1	75	3	0.2	186	5	1	75	3	0.2	186	5	1	112	3	0.2	186	5	1	75	3	2.34772	186	11	0
10	MEE	2369.8	916.3	586.12	91.26	130.5	0	37.5	9.3	391.3	74.5	26.82	7.46	0	0				0.85	2788	1	0.7	1309	1	0.5	261	4	0	559	6	0.5	75	4	0.05	186	7	0.7	559	8	0.1	745	9	0.18	149	10	0.02	373	11	0
11	CHN	91	370	821	1642.53	75	37.2	559	298	112	37.2	75	1270.12	0	0				1	91	1	1	370	1	1	75	3	0.2	186	5	1	559	3	0.2	1490	5	1	112	3	0.2	186	5	1	75	3	6.82863	186	11	0
12	OEA	26	60	187	89.2	0	7.4	0	7.4	112	37.2	75	37.2	0	0				1	26	1	1	60	1	1	0	3	0.2	37	5	1	0	3	0.2	37	5	1	112	3	0.2	186	5	1	75	3	0.2	186	11	0
13	IND	41	33	523	223.4	75	37.2	261	111.8	112	37.2	75	37.2	0	0				1	41	1	1	33	1	1	75	3	0.2	186	5	1	261	3	0.2	559	5	1	112	3	0.2	186	5	1	75	3	0.2	186	11	0
14	OSA	49	81	671	283.4	186	74.6	37	22.4	224	74.6	224	111.8	0	0				1	49	1	1	81	1	1	186	3	0.2	373	5	1	37	3	0.2	112	5	1	224	3	0.2	373	5	1	224	3	0.2	559	11	0
15	JPN	1	0	37	22.4	0	0	37	22.4	0	0	0	0	0	0				1	1	1	1	0	1	1	0	3	0.2	0	5	1	37	3	0.2	112	5	1	0	3	0.2	0	5	1	0	3	0.2	0	11	0
16	OCN	115	78	559	417.78	75	37.2	186	74.6	149	37.2	149	268.78	0	0				1	115	1	1	78	1	1	75	3	0.2	186	5	1	186	3	0.2	373	5	1	149	3	0.2	186	5	1	149	3	0.72059	373	11	0
17	PAS	274	304	411	171.4	75	37.2	37	22.4	224	74.6	75	37.2	0	0				1	274	1	1	304	1	1	75	3	0.2	186	5	1	37	3	0.2	112	5	1	224	3	0.2	373	5	1	75	3	0.2	186	11	0
18	LAC	299	402	821	2197.23	224	111.8	224	111.8	224	111.8	149	1861.83	0	0				1	299	1	1	402	1	1	224	3	0.2	559	5	1	224	3	0.2	559	5	1	224	3	0.2	559	5	1	149	3	4.9915	373	11	0
19	SOO	0	0	0	0	0	0	0	0	0	0	0	0	0	0				0	0	-	0	0	-	0	0	3	0	0	5	0	0	3	0	0	5	0	0	3	0	0	5	0	0	3	0.2	0	11	0
20	ARC	0	874.148	0	0	0	0	0	0	0	0	0	0	0	0				0	0	-	0.5	1748.3	2	0	0	3	0	0	5	0	0	3	0	0	5	0	0	3	0	0	5	0	0	3	0.5	0	11	0
	SUB-TOTAL	6283.5	7987.65	16160.4	9544.87	3189	1013.2	3578.5	1499.7	5170	1359.8	4222.94	5672.17	0	0				C stands for comments (see below)
	TOTAL	14271.1		25705.3
	Grand TOTAL	39976.5																	Comments
	Legend																		#	Reference	Comment
	Reserves																		1	1, 2	Using the most recent BGR data instead of USGS data (as reported in GEA Table 7.11 chap.7 p. 453)
	Resources																		2	EJ	Scenario assumption: only 50% of Arctic resources available
																			3	EJ	Scenario assumption: All Deep gas, CBM, tight gas and shale gas reserves available in importing countries
																			4	EJ	Scenario assumption: only 50% of Deep gas and CBM reserves available in exporting countries
																			5	EJ	Scenario assumption: only 20% of Deep gas resources available in exporting countries
																			6	EJ	Scenario assumption: Deep gas resources not available in exporting countries
																			7	EJ	Scenario assumption: only 5% of Coal-bed methane resources available in importing countries
																			8	EJ	Scenario assumption: only 70% of Tight gas reserves available in exporting countries
																			9	EJ	Scenario assumption: only 10% of Tight gas resources available in exporting countries
																			10	EJ	Scenario assumption: only 18% of Shale gas reserves available in exporting countries
																			11	1, 5, EJ	Scenario assumption: Maximum between GEA and ARI (Table 1-3 p. 1-5) and Expert judgement: only 10% of Shale gas resources available in exporting countries and 40% in importing countries
																			12	EJ	Scenario assumption: Gas hydrates not available in this scenario
																			References are listed in tab 'References' - Grey cells indicate default GEA assumptions/data - EJ: Expert judgement
																						Scenario assumption: only 50% of Coal-bed methane reserves available
																						Scenario assumption: only 5% of Coal-bed methane resources available
																						Scenario assumption: only 70% of Tight gas reserves available
																						Scenario assumption: only 10% of Tight gas resources available
																						Scenario assumption: only 18% of Shale gas reserves available
[truncated: 2 more columns]

## Sheet: 7. Gas - Production costs
	Gas production costs data									Assumptions
#	Reservoir type	Category	Regional distinction	Production costs ($/GJ)		# cost bins				#	Reservoir type	Category	Regional distinction	GEA extraction costs ($/GJ)		# cost bins	Cost multiplier	Cost mark-up ($/GJ)	C
				Min	Max									Min	Max
1	Conventional	Reserves	MEE, FSU	0.7	6.96	4				1	Conventional	Reserves	MEE, FSU	0.35	3.48	4	2	0	1
2		Reserves	NAF	1.4	13.92	4				2		Reserves	NAF	0.35	3.48	4	4	0	2
3		Reserves	rest	0.882	8.7696	4				3		Reserves	rest	0.35	3.48	4	2.52	0	3
4		Resources	MEE, FSU	0.7	6.96	4				4		Resources	MEE, FSU	0.35	3.48	4	2	0	1
5		Resources	NAF	1.4	13.92	4				5		Resources	NAF	0.35	3.48	4	4	0	2
6		Resources	rest	0.882	8.7696	4				6		Resources	rest	0.35	3.48	4	2.52	0	3
-	Unconventional	Reserves	MEE, NAF, FSU	4.05	11.1	4				-	Unconventional	Reserves	all	3	5.55	4	-	-	-
				3.45	8.33							Reserves
-		Resources	all	6.76	26.42	5				-		Resources	all	6.76	13.21	5	-	-	-
												Resources
7	Deep Gas	Reserves	MEE, NAF, FSU	6	11.1	4				7	Deep Gas	Reserves	MEE, NAF, FSU	3	5.55	4	2	0	4
8		Reserves	rest	4.5	8.325	4				8		Reserves	rest	3	5.55	4	1.5	0	5
9		Resources	MEE, NAF, FSU	6.76	13.21	5				9		Resources	MEE, NAF, FSU	6.76	13.21	5	1	0	-
10		Resources	rest	12.168	23.778	5				10		Resources	rest	6.76	13.21	5	1.8	0	6
11	Coal-bed methane	Reserves	MEE, NAF, FSU	4.5	8.325	4				11	Coal-bed methane	Reserves	MEE, NAF, FSU	3	5.55	4	1.5	0	7
12		Reserves	rest	3.45	6.3825	4				12		Reserves	rest	3	5.55	4	1.15	0	8
13		Resources	MEE, NAF, FSU	11.83	23.1175	5				13		Resources	MEE, NAF, FSU	6.76	13.21	5	1.75	0	9
14		Resources	rest	8.45	16.5125	5				14		Resources	rest	6.76	13.21	5	1.25	0	10
15	Tight gas	Reserves	MEE, NAF, FSU	4.05	7.4925	4				15	Tight gas	Reserves	MEE, NAF, FSU	3	5.55	4	1.35	0	11
16		Reserves	rest	3.45	6.3825	4				16		Reserves	rest	3	5.55	4	1.15	0	12
17		Resources	MEE, NAF, FSU	13.52	26.42	5				17		Resources	MEE, NAF, FSU	6.76	13.21	5	2	0	13
18		Resources	rest	8.45	16.5125	5				18		Resources	rest	6.76	13.21	5	1.25	0	14
19	Shale gas	Reserves	MEE, NAF, FSU	4.71	8.7135	4				19	Shale gas	Reserves	MEE, NAF, FSU	3	5.55	4	1.57	0	15
20		Reserves	rest	4.41	8.1585	4				20		Reserves	rest	3	5.55	4	1.47	0	16
21		Resources	MEE, NAF, FSU	13.9932	27.3447	5				21		Resources	MEE, NAF, FSU	6.76	13.21	5	2.07	0	17
22		Resources	rest	12.6412	24.7027	5				22		Resources	rest	6.76	13.21	5	1.87	0	18
23	Gas hydrates	Reserves	MEE, NAF, FSU	3	5.55	4				23	Gas hydrates	Reserves	MEE, NAF, FSU	3	5.55	4	1	0	-
24		Resources	rest	6.76	13.21	5				24		Resources	rest	6.76	13.21	5	1	0	-
										C stands for comments (see below)
										Comments
										#	Reference	Comment
										1	11, EJ	Scenario assumption: Increasing costs of conventional reserves by a factor of 2 in the MEE and FSU regions. This cost adjustment reflects the significant cost increase over the past decade as shown by the CERA upstream indices (+13% c/w SSP2)
										2	11, EJ	Scenario assumption: Increasing costs of conventional reserves by a factor of 4 inthe NAF region. This cost adjustment reflects the significant cost increase over the past decade as shown by the CERA upstream indices (+126% c/w SSP2)
										3	11, EJ	Scenario assumption: Increasing costs of conventional reserves by a factor of 2.52 in the remaining regions. This cost adjustment reflects the significant cost increase over the past decade as shown by the CERA upstream indices (+59% c/w SSP2)
										4	EJ	Scenario assumption: Increasing costs of Deep gas reserves by a factor of 2 in exporting countries
										5	EJ	Scenario assumption: Increasing costs of Deep gas reserves by a factor of 1.5 in importing countries
										6	EJ	Scenario assumption: Increasing costs of Deep gas resources by a factor of 1.8 in importing countries
										7	EJ	Scenario assumption: Increasing costs of Coal-bed methane reserves by 50% in exporting countries
										8	EJ	Scenario assumption: Increasing costs of Coal-bed methane reserves by 15% in importing countries
										9	EJ	Scenario assumption: Increasing costs of Coal-bed methane resources by 75% in exporting countries
										10	EJ	Scenario assumption: Increasing costs of Coal-bed methane resources by 25% in importing countries
										11	EJ	Scenario assumption: Increasing costs of Tight gas reserves by 35% in exporting countries
										12	EJ	Scenario assumption: Increasing costs of Tight gas reserves by 15% in importing countries
										13	EJ	Scenario assumption: Increasing costs of Tight gas resources by a factor of 2 in exporting countries
										14	EJ	Scenario assumption: Increasing costs of Tight gas resources by 25% in importing countries
										15	12, EJ	Scenario assumption: Increasing costs of Shale gas reserves by 57% in exporting countries
										16	12, EJ	Scenario assumption: Increasing costs of Shale gas reserves by 47% in importing countries
										17	12, EJ	Scenario assumption: Increasing costs of Shale gas resources by 107% in exporting countries
										18	12, EJ	Scenario assumption: Increasing costs of Shale gas resources by 87% in importing countries
										References are listed in tab 'References' - Grey cells indicate default GEA assumptions/data - EJ: Expert judgement

## Sheet: 8. References
	References
#	Author(s)	Organisation	Publisher	Title	Year	URL
1	Rogner H.-H. et al.	IIASA	IIASA	Global Energy Assessment - Chapter 7	2012	http://www.iiasa.ac.at/web/home/research/researchPrograms/Energy/Chapters_Home.en.html
2	BGR	BGR	BGR	Energierohstoffe 2009	2009	http://www.bgr.bund.de/DE/Themen/Energie/Produkte/energierohstoffe_2009.html
3	Bird K.J. et al.	USGS	USGS	Circum-Arctic Resource Appraisal: Estimates of Undiscovered Oil and Gas North of the Arctic Circle	2008	http://pubs.usgs.gov/fs/2008/3049/
4	Klett T.R. et al.	USGS	USGS	Assessment of Potential Additions to Conventional Oil and Gas Resources of the World (Outside the United States) from Reserve Growth	2012	http://pubs.usgs.gov/fs/2012/3052/
5	Kuuskraa V. et al.	ARI	ARI	World shale gas resources: An initial assessment of 14 regions outside the US	2011	http://www.eia.gov/analysis/studies/worldshalegas/
6	Dyni J.R.	USGS	USGS	Geology and Resources of Some World Oil-Shale Deposits	2005	http://pubs.usgs.gov/sir/2005/5294/
7	Brandt A.R.	U. of Berkley	Environ. Science & Tech.	Converting oil shale to liquid fuels: energy inputs and greenhouse fas emissions of the shell in situ conversion process	2008	http://pubs.acs.org/doi/abs/10.1021/es800531f
8	IEA	IEA	IEA	World Energy Outlook	2008	http://www.worldenergyoutlook.org/publications/2008-1994/
9	RAND	RAND	RAND		2007	www.rand.org/pubs/monographs/2005/RAND_MG414.pdf
10	Tipee B.		Oil & Gas journal	Steady growth seen for Canadian bitumen output despite increasing needs for pipeline capacity, gas	2012	http://www.ogj.com/articles/print/vol-110/issue-5/drilling-production/steady-growth-seen-for-canadian.html
11	CERA	CERA	CERA	CERA Upstream Capital and Operating costs indices	2012	http://www.ihs.com/info/cera/ihsindexes/index.aspx
12	IEA	IEA	IEA	Golden Rules for a Golden Age of Gas	2012	http://www.worldenergyoutlook.org/goldenrules/

## Sheet: 9. Definitions
	Definitions
	Reserves
	Resources
	Long-term supply cost curve
	Cumulative Extraction Cost Curve
	Cumulative Availability Curve
	Production cost
	Recovery rate
	Regions	Same as in GEA

[truncated: 1 more sheets: 10. Revision information]
