# Supplementary material for: Data on fossil fuel availability for Shared Socioeconomic Pathways
Source: Data Brief. 2016 Nov 18;10:44–6. doi: 10.1016/j.dib.2016.11.043 (PMC5137328; doi:10.1016/j.dib.2016.11.043)
Supplement: Supplementary file 10 — Supplementary material [file mmc10.xlsx]

## Sheet: 0. Information
	Scenario name	SSP4
	Date of initial assessment	2013-01-18
	Revision number	2
	Last revision date	2014-08-11
	Authors	Jerome Hilaire and Nico Bauer
	Affiliation	Potsdam Institute for Climate Impact Research
	Contacts	hilaire@pik-potsdam.de or bauer@pik-potsdam.de
	Where to find the relevant information?
	This Excel workbook contains a collection of spreadsheet that describe oil and gas data. The colour code of the list below follows that of the spreadsheet tabs. Supply cost curves are displayed in spreadsheet 1. Data are further given on 3 levels with increasing degree of information. Oil and gas data summaries provide the basic information (spreadsheet 2 and 3). Oil and gas resources and costs d…
	0. Information (this spreadsheet)
	1. Oil and gas supply-cost curves
	2. Oil data summary (vs original GEA)
	3. Gas data summary (vs original GEA)
	4. Oil resources (quantities)
	5. Oil production costs
	6. Gas resources (quantities)
	7. Gas production costs
	8. References
	9. Definitions
	10. Revision information
	How to read these data?
	Red fonts indicate a change in the data.
	Green backgrounds are used for reserves
	Orange backgrounds are used for resources
	Blue backgrounds are used for conventional resources
	Violet backgrounds are used for unconventional resources

## Sheet: 1. Supply-cost curves
	Oil and gas supply cost curves
	Oil data												Gas data
	Updated GEA (SSP4)						GEA						Updated GEA (SSP4)						GEA
	v_curSpaTyp	v_curSpaItm	v_curffTyp	v_curCost	v_curQty		$/GJ	EJ					v_curSpaTyp	v_curSpaItm	v_curffTyp	v_curCost	v_curQty		$/GJ	EJ
	region	MEE	COO-rv	1.74	0		0.87	0					region	FSU	COG-rv	0.48475	0		0.5	0
	region	MEE	COO-rv	1.74	1071.5		0.87	828.409					region	FSU	COG-rv	0.48475	398.021		0.5	2257.05
	region	MEE	COO-rs	1.74	1071.5		1.0225	828.409					region	MEE	COG-rv	0.48475	398.021		1.07	2257.05
	region	MEE	COO-rs	1.74	1076.42		1.0225	1656.82					region	MEE	COG-rv	0.48475	1095.02		1.07	5405.92
	region	MEE	COO-rv	2.045	1076.42		1.175	1656.82					region	USA	COG-rv	0.616	1095.02		1.5	5405.92
	region	MEE	COO-rv	2.045	2147.92		1.175	3313.64					region	USA	COG-rv	0.616	1148.26		1.5	8488.47
	region	MEE	COO-rs	2.045	2147.92		1.48	3313.64					region	CAN	COG-rv	0.616	1148.26		2	8488.47
	region	MEE	COO-rs	2.045	2152.85		1.48	6629.93					region	CAN	COG-rv	0.616	1159.07		2	10080.6
	region	USA	COO-rv	2.1924	2152.85		2.1925	6629.93					region	WEU	COG-rv	0.616	1159.07		2.75	10080.6
	region	USA	COO-rv	2.1924	2160.14		2.1925	8341.96					region	WEU	COG-rv	0.616	1199.57		2.75	10451.4
	region	EAF	COO-rv	2.1924	2160.14		2.965	8341.96					region	EEU	COG-rv	0.616	1199.57		3	10451.4
	region	EAF	COO-rv	2.1924	2160.22		2.965	9473.07					region	EEU	COG-rv	0.616	1204.58		3	14482.6
	region	WCA	COO-rv	2.1924	2160.22		2.965	9473.07					region	NAF	COG-rv	0.616	1204.58		3.7	14482.6
	region	WCA	COO-rv	2.1924	2206.46		2.965	10329.1					region	NAF	COG-rv	0.616	1225.3		3.7	19521.6
	region	SAF	COO-rv	2.1924	2206.46		3.50877	10329.1					region	EAF	COG-rv	0.616	1225.3		4.54	19521.6
	region	SAF	COO-rv	2.1924	2211.31		3.50877	11490.4					region	EAF	COG-rv	0.616	1225.37		4.54	25568.5
	region	IND	COO-rv	2.1924	2211.31		4.38596	11490.4					region	WCA	COG-rv	0.616	1225.37		5.548	25568.5
	region	IND	COO-rv	2.1924	2211.91		4.38596	11880.9					region	WCA	COG-rv	0.616	1278.62		5.548	30607.5
	region	OSA	COO-rv	2.1924	2211.91		4.38596	11880.9					region	SAF	COG-rv	0.616	1278.62		6.7576	30607.5
	region	OSA	COO-rv	2.1924	2211.95		4.38596	12271.5					region	SAF	COG-rv	0.616	1283.87		6.7576	32419.8
	region	OCN	COO-rv	2.1924	2211.95		5.26316	12271.5					region	CHN	COG-rv	0.616	1283.87		8.14864	32419.8
	region	OCN	COO-rv	2.1924	2212.59		5.26316	13414.8					region	CHN	COG-rv	0.616	1306.62		8.14864	34232.2
	region	PAS	COO-rv	2.1924	2212.59		7.01754	13414.8					region	OEA	COG-rv	0.616	1306.62		9.67878	34232.2
	region	PAS	COO-rv	2.1924	2217.3		7.01754	14186.5					region	OEA	COG-rv	0.616	1313.12		9.67878	35843.2
	region	LAC	COO-rv	2.1924	2217.3		7.01754	14186.5					region	IND	COG-rv	0.616	1313.12		11.3619	35843.2
	region	LAC	COO-rv	2.1924	2253.26		7.01754	15373.7					region	IND	COG-rv	0.616	1316.67		11.3619	37454.2
	region	MEE	COO-rv	2.35	2253.26		8.77193	15373.7					region	OSA	COG-rv	0.616	1316.67		13.2134	37454.2
	region	MEE	COO-rv	2.35	3324.76		8.77193	17438.7					region	OSA	COG-rv	0.616	1326.46		13.2134	43662.4
	region	MEE	COO-rs	2.35	3324.76		8.77193	17438.7					region	JPN	COG-rv	0.616	1326.46
	region	MEE	COO-rs	2.35	3329.68		8.77193	18856.3					region	JPN	COG-rv	0.616	1326.66
	region	USA	COO-rv	2.5767	3329.68		10.0877	18856.3					region	OCN	COG-rv	0.616	1326.66
	region	USA	COO-rv	2.5767	3336.97		10.0877	20281.4					region	OCN	COG-rv	0.616	1355.41
	region	EAF	COO-rv	2.5767	3336.97		12.0614	20281.4					region	PAS	COG-rv	0.616	1355.41
	region	EAF	COO-rv	2.5767	3337.05		12.0614	22874.5					region	PAS	COG-rv	0.616	1401.41
	region	WCA	COO-rv	2.5767	3337.05		14.693	22874.5					region	LAC	COG-rv	0.616	1401.41
	region	WCA	COO-rv	2.5767	3383.29		14.693	25971.9					region	LAC	COG-rv	0.616	1464.2
	region	SAF	COO-rv	2.5767	3383.29		17.9825	25971.9					region	MEE	COG-rs	0.6195	1464.2
	region	SAF	COO-rv	2.5767	3388.14		17.9825	28098.4					region	MEE	COG-rs	0.6195	1533.1
	region	IND	COO-rv	2.5767	3388.14		21.9298	28098.4					region	FSU	COG-rv	0.695962	1533.1
	region	IND	COO-rv	2.5767	3388.74		21.9298	30236					region	FSU	COG-rv	0.695962	1931.12
	region	OSA	COO-rv	2.5767	3388.74		26.2061	30236					region	MEE	COG-rv	0.695962	1931.12
	region	OSA	COO-rv	2.5767	3388.78		26.2061	34125.6					region	MEE	COG-rv	0.695962	2628.12
	region	OCN	COO-rv	2.5767	3388.78								region	WCA	COG-rs	0.882	2628.12
	region	OCN	COO-rv	2.5767	3389.42								region	WCA	COG-rs	0.882	2639.57
	region	PAS	COO-rv	2.5767	3389.42								region	SAF	COG-rs	0.882	2639.57
	region	PAS	COO-rv	2.5767	3394.13								region	SAF	COG-rs	0.882	2645.56
	region	LAC	COO-rv	2.5767	3394.13								region	CHN	COG-rs	0.882	2645.56
	region	LAC	COO-rv	2.5767	3430.09								region	CHN	COG-rs	0.882	2660.57
	region	MEE	COO-rv	2.655	3430.09								region	OEA	COG-rs	0.882	2660.57
	region	MEE	COO-rv	2.655	4501.59								region	OEA	COG-rs	0.882	2663
	region	MEE	COO-rs	2.655	4501.59								region	OCN	COG-rs	0.882	2663
	region	MEE	COO-rs	2.655	4506.51								region	OCN	COG-rs	0.882	2666
	region	FSU	COO-rv	2.96	4506.51								region	USA	COG-rv	0.8844	2666
	region	FSU	COO-rv	2.96	4671.8								region	USA	COG-rv	0.8844	2719.24
	region	MEE	COO-rs	2.96	4671.8								region	CAN	COG-rv	0.8844	2719.24
	region	MEE	COO-rs	2.96	4827.03								region	CAN	COG-rv	0.8844	2730.05
	region	USA	COO-rv	2.961	4827.03								region	WEU	COG-rv	0.8844	2730.05
	region	USA	COO-rv	2.961	4834.32								region	WEU	COG-rv	0.8844	2770.55
	region	EAF	COO-rv	2.961	4834.32								region	EEU	COG-rv	0.8844	2770.55
	region	EAF	COO-rv	2.961	4834.4								region	EEU	COG-rv	0.8844	2775.56
	region	WCA	COO-rv	2.961	4834.4								region	NAF	COG-rv	0.8844	2775.56
	region	WCA	COO-rv	2.961	4880.64								region	NAF	COG-rv	0.8844	2796.28
	region	SAF	COO-rv	2.961	4880.64								region	EAF	COG-rv	0.8844	2796.28
	region	SAF	COO-rv	2.961	4885.5								region	EAF	COG-rv	0.8844	2796.35
	region	IND	COO-rv	2.961	4885.5								region	WCA	COG-rv	0.8844	2796.35
	region	IND	COO-rv	2.961	4886.09								region	WCA	COG-rv	0.8844	2849.6
	region	OSA	COO-rv	2.961	4886.09								region	SAF	COG-rv	0.8844	2849.6
	region	OSA	COO-rv	2.961	4886.13								region	SAF	COG-rv	0.8844	2854.85
	region	OCN	COO-rv	2.961	4886.13								region	CHN	COG-rv	0.8844	2854.85
	region	OCN	COO-rv	2.961	4886.78								region	CHN	COG-rv	0.8844	2877.6
	region	PAS	COO-rv	2.961	4886.78								region	OEA	COG-rv	0.8844	2877.6
	region	PAS	COO-rv	2.961	4891.48								region	OEA	COG-rv	0.8844	2884.1
	region	LAC	COO-rv	2.961	4891.48								region	IND	COG-rv	0.8844	2884.1
	region	LAC	COO-rv	2.961	4927.44								region	IND	COG-rv	0.8844	2887.66
	region	USA	COO-rv	3.3453	4927.44								region	OSA	COG-rv	0.8844	2887.66
	region	USA	COO-rv	3.3453	4934.73								region	OSA	COG-rv	0.8844	2897.45
	region	EAF	COO-rv	3.3453	4934.73								region	JPN	COG-rv	0.8844	2897.45
	region	EAF	COO-rv	3.3453	4934.81								region	JPN	COG-rv	0.8844	2897.65
	region	WCA	COO-rv	3.3453	4934.81								region	OCN	COG-rv	0.8844	2897.65
	region	WCA	COO-rv	3.3453	4981.05								region	OCN	COG-rv	0.8844	2926.4
	region	SAF	COO-rv	3.3453	4981.05								region	PAS	COG-rv	0.8844	2926.4
	region	SAF	COO-rv	3.3453	4985.9								region	PAS	COG-rv	0.8844	2972.4
	region	IND	COO-rv	3.3453	4985.9								region	LAC	COG-rv	0.8844	2972.4
	region	IND	COO-rv	3.3453	4986.5								region	LAC	COG-rv	0.8844	3035.19
	region	OSA	COO-rv	3.3453	4986.5								region	MEE	COG-rs	0.889425	3035.19
	region	OSA	COO-rv	3.3453	4986.54								region	MEE	COG-rs	0.889425	3104.08
	region	OCN	COO-rv	3.3453	4986.54								region	FSU	COG-rv	0.907175	3104.08
	region	OCN	COO-rv	3.3453	4987.18								region	FSU	COG-rv	0.907175	3502.1
	region	PAS	COO-rv	3.3453	4987.18								region	MEE	COG-rv	0.907175	3502.1
	region	PAS	COO-rv	3.3453	4991.89								region	MEE	COG-rv	0.907175	4199.1
	region	LAC	COO-rv	3.3453	4991.89								region	FSU	COG-rv	1.11839	4199.1
	region	LAC	COO-rv	3.3453	5027.84								region	FSU	COG-rv	1.11839	4597.12
	region	FSU	COO-rv	3.435	5027.84								region	MEE	COG-rv	1.11839	4597.12
	region	FSU	COO-rv	3.435	5193.13								region	MEE	COG-rv	1.11839	5294.12
	region	MEE	COO-rs	3.435	5193.13								region	USA	COG-rv	1.1528	5294.12
	region	MEE	COO-rs	3.435	5348.36								region	USA	COG-rv	1.1528	5347.36
	region	NAF	COO-rv	3.48	5348.36								region	CAN	COG-rv	1.1528	5347.36
	region	NAF	COO-rv	3.48	5356.25								region	CAN	COG-rv	1.1528	5358.17
	region	USA	COO-rv	3.7296	5356.25								region	WEU	COG-rv	1.1528	5358.17
	region	USA	COO-rv	3.7296	5389.46								region	WEU	COG-rv	1.1528	5398.66
	region	CAN	COO-rv	3.7296	5389.46								region	EEU	COG-rv	1.1528	5398.66
	region	CAN	COO-rv	3.7296	5391.12								region	EEU	COG-rv	1.1528	5403.68
	region	EEU	COO-rv	3.7296	5391.12								region	NAF	COG-rv	1.1528	5403.68
	region	EEU	COO-rv	3.7296	5391.33								region	NAF	COG-rv	1.1528	5424.4
	region	EAF	COO-rv	3.7296	5391.33								region	EAF	COG-rv	1.1528	5424.4
	region	EAF	COO-rv	3.7296	5392.22								region	EAF	COG-rv	1.1528	5424.47
	region	WCA	COO-rv	3.7296	5392.22								region	WCA	COG-rv	1.1528	5424.47
	region	WCA	COO-rv	3.7296	5409.48								region	WCA	COG-rv	1.1528	5477.72
	region	SAF	COO-rv	3.7296	5409.48								region	SAF	COG-rv	1.1528	5477.72
	region	SAF	COO-rv	3.7296	5423.88								region	SAF	COG-rv	1.1528	5482.97
	region	CHN	COO-rv	3.7296	5423.88								region	CHN	COG-rv	1.1528	5482.97
	region	CHN	COO-rv	3.7296	5425.63								region	CHN	COG-rv	1.1528	5505.72
	region	OEA	COO-rv	3.7296	5425.63								region	OEA	COG-rv	1.1528	5505.72
	region	OEA	COO-rv	3.7296	5426.17								region	OEA	COG-rv	1.1528	5512.22
	region	IND	COO-rv	3.7296	5426.17								region	IND	COG-rv	1.1528	5512.22
	region	IND	COO-rv	3.7296	5430.36								region	IND	COG-rv	1.1528	5515.77
	region	OSA	COO-rv	3.7296	5430.36								region	OSA	COG-rv	1.1528	5515.77
	region	OSA	COO-rv	3.7296	5430.61								region	OSA	COG-rv	1.1528	5525.56
	region	OCN	COO-rv	3.7296	5430.61								region	JPN	COG-rv	1.1528	5525.56
	region	OCN	COO-rv	3.7296	5434.74								region	JPN	COG-rv	1.1528	5525.76
	region	PAS	COO-rv	3.7296	5434.74								region	OCN	COG-rv	1.1528	5525.76
	region	PAS	COO-rv	3.7296	5446.28								region	OCN	COG-rv	1.1528	5554.51
	region	LAC	COO-rv	3.7296	5446.28								region	PAS	COG-rv	1.1528	5554.51
	region	LAC	COO-rv	3.7296	5530.08								region	PAS	COG-rv	1.1528	5600.51
	region	USA	COO-rs	3.7296	5530.08								region	LAC	COG-rv	1.1528	5600.51
	region	USA	COO-rs	3.7296	5540.59								region	LAC	COG-rv	1.1528	5663.3
	region	WCA	COO-rs	3.7296	5540.59								region	MEE	COG-rs	1.15935	5663.3
	region	WCA	COO-rs	3.7296	5600.47								region	MEE	COG-rs	1.15935	5732.19
	region	SAF	COO-rs	3.7296	5600.47								region	WCA	COG-rs	1.2663	5732.19
	region	SAF	COO-rs	3.7296	5612.25								region	WCA	COG-rs	1.2663	5743.65
	region	PAS	COO-rs	3.7296	5612.25								region	SAF	COG-rs	1.2663	5743.65
	region	PAS	COO-rs	3.7296	5615.69								region	SAF	COG-rs	1.2663	5749.64
	region	LAC	COO-rs	3.7296	5615.69								region	CHN	COG-rs	1.2663	5749.64
	region	LAC	COO-rs	3.7296	5631.1								region	CHN	COG-rs	1.2663	5764.65
	region	FSU	COO-rv	3.91	5631.1								region	OEA	COG-rs	1.2663	5764.65
	region	FSU	COO-rv	3.91	5796.39								region	OEA	COG-rs	1.2663	5767.08
	region	MEE	COO-rs	3.91	5796.39								region	OCN	COG-rs	1.2663	5767.08
	region	MEE	COO-rs	3.91	5951.62								region	OCN	COG-rs	1.2663	5770.08
	region	NAF	COO-rv	4.09	5951.62								region	FSU	COG-rv	1.3296	5770.08
	region	NAF	COO-rv	4.09	5959.51								region	FSU	COG-rv	1.3296	5960.06
	region	USA	COO-rv	4.3281	5959.51								region	USA	COG-rv	1.4212	5960.06
	region	USA	COO-rv	4.3281	5992.72								region	USA	COG-rv	1.4212	6013.3
	region	CAN	COO-rv	4.3281	5992.72								region	CAN	COG-rv	1.4212	6013.3
	region	CAN	COO-rv	4.3281	5994.38								region	CAN	COG-rv	1.4212	6024.11
	region	EEU	COO-rv	4.3281	5994.38								region	WEU	COG-rv	1.4212	6024.11
	region	EEU	COO-rv	4.3281	5994.59								region	WEU	COG-rv	1.4212	6064.61
	region	EAF	COO-rv	4.3281	5994.59								region	EEU	COG-rv	1.4212	6064.61
	region	EAF	COO-rv	4.3281	5995.47								region	EEU	COG-rv	1.4212	6069.62
	region	WCA	COO-rv	4.3281	5995.47								region	NAF	COG-rv	1.4212	6069.62
	region	WCA	COO-rv	4.3281	6012.73								region	NAF	COG-rv	1.4212	6090.34
	region	SAF	COO-rv	4.3281	6012.73								region	EAF	COG-rv	1.4212	6090.34
	region	SAF	COO-rv	4.3281	6027.13								region	EAF	COG-rv	1.4212	6090.41
	region	CHN	COO-rv	4.3281	6027.13								region	WCA	COG-rv	1.4212	6090.41
	region	CHN	COO-rv	4.3281	6028.88								region	WCA	COG-rv	1.4212	6143.66
	region	OEA	COO-rv	4.3281	6028.88								region	SAF	COG-rv	1.4212	6143.66
	region	OEA	COO-rv	4.3281	6029.43								region	SAF	COG-rv	1.4212	6148.91
	region	IND	COO-rv	4.3281	6029.43								region	CHN	COG-rv	1.4212	6148.91
	region	IND	COO-rv	4.3281	6033.61								region	CHN	COG-rv	1.4212	6171.66
	region	OSA	COO-rv	4.3281	6033.61								region	OEA	COG-rv	1.4212	6171.66
	region	OSA	COO-rv	4.3281	6033.87								region	OEA	COG-rv	1.4212	6178.16
	region	OCN	COO-rv	4.3281	6033.87								region	IND	COG-rv	1.4212	6178.16
	region	OCN	COO-rv	4.3281	6037.99								region	IND	COG-rv	1.4212	6181.72
	region	PAS	COO-rv	4.3281	6037.99								region	OSA	COG-rv	1.4212	6181.72
	region	PAS	COO-rv	4.3281	6049.53								region	OSA	COG-rv	1.4212	6191.51
	region	LAC	COO-rv	4.3281	6049.53								region	JPN	COG-rv	1.4212	6191.51
	region	LAC	COO-rv	4.3281	6133.33								region	JPN	COG-rv	1.4212	6191.71
	region	USA	COO-rs	4.3281	6133.33								region	OCN	COG-rv	1.4212	6191.71
	region	USA	COO-rs	4.3281	6143.84								region	OCN	COG-rv	1.4212	6220.46
	region	WCA	COO-rs	4.3281	6143.84								region	PAS	COG-rv	1.4212	6220.46
	region	WCA	COO-rs	4.3281	6203.73								region	PAS	COG-rv	1.4212	6266.46
	region	SAF	COO-rs	4.3281	6203.73								region	LAC	COG-rv	1.4212	6266.46
	region	SAF	COO-rs	4.3281	6215.5								region	LAC	COG-rv	1.4212	6329.25
	region	PAS	COO-rs	4.3281	6215.5								region	MEE	COG-rs	1.42928	6329.25
	region	PAS	COO-rs	4.3281	6218.95								region	MEE	COG-rs	1.42928	6398.14
	region	LAC	COO-rs	4.3281	6218.95								region	FSU	COG-rv	1.47849	6398.14
	region	LAC	COO-rs	4.3281	6234.35								region	FSU	COG-rv	1.47849	6588.12
	region	FSU	COO-rv	4.385	6234.35								region	FSU	COG-rv	1.62737	6588.12
	region	FSU	COO-rv	4.385	6399.64								region	FSU	COG-rv	1.62737	6778.1
	region	MEE	COO-rs	4.385	6399.64								region	WCA	COG-rs	1.6506	6778.1
	region	MEE	COO-rs	4.385	6554.87								region	WCA	COG-rs	1.6506	6789.56
	region	NAF	COO-rv	4.7	6554.87								region	SAF	COG-rs	1.6506	6789.56
	region	NAF	COO-rv	4.7	6562.77								region	SAF	COG-rs	1.6506	6795.54
	region	FSU	COO-rv	4.86	6562.77								region	CHN	COG-rs	1.6506	6795.54
	region	FSU	COO-rv	4.86	6581.23								region	CHN	COG-rs	1.6506	6810.55
	region	FSU	COO-rs	4.86	6581.23								region	OEA	COG-rs	1.6506	6810.55
	region	FSU	COO-rs	4.86	6757.59								region	OEA	COG-rs	1.6506	6812.98
	region	MEE	COO-rs	4.86	6757.59								region	OCN	COG-rs	1.6506	6812.98
	region	MEE	COO-rs	4.86	6819.68								region	OCN	COG-rs	1.6506	6815.99
	region	USA	COO-rv	4.9266	6819.68								region	USA	COG-rv	1.6896	6815.99
	region	USA	COO-rv	4.9266	6852.89								region	USA	COG-rv	1.6896	6828.25
	region	CAN	COO-rv	4.9266	6852.89								region	CAN	COG-rv	1.6896	6828.25
	region	CAN	COO-rv	4.9266	6854.55								region	CAN	COG-rv	1.6896	6833.69
	region	EEU	COO-rv	4.9266	6854.55								region	WEU	COG-rv	1.6896	6833.69
	region	EEU	COO-rv	4.9266	6854.76								region	WEU	COG-rv	1.6896	6833.69
	region	EAF	COO-rv	4.9266	6854.76								region	EEU	COG-rv	1.6896	6833.69
	region	EAF	COO-rv	4.9266	6855.64								region	EEU	COG-rv	1.6896	6836.43
	region	WCA	COO-rv	4.9266	6855.64								region	NAF	COG-rv	1.6896	6836.43
	region	WCA	COO-rv	4.9266	6872.91								region	NAF	COG-rv	1.6896	6884.78
	region	SAF	COO-rv	4.9266	6872.91								region	EAF	COG-rv	1.6896	6884.78
	region	SAF	COO-rv	4.9266	6887.3								region	EAF	COG-rv	1.6896	6884.93
	region	CHN	COO-rv	4.9266	6887.3								region	IND	COG-rv	1.6896	6884.93
	region	CHN	COO-rv	4.9266	6889.06								region	IND	COG-rv	1.6896	6891.62
	region	OEA	COO-rv	4.9266	6889.06								region	OSA	COG-rv	1.6896	6891.62
	region	OEA	COO-rv	4.9266	6889.6								region	OSA	COG-rv	1.6896	6894.09
	region	IND	COO-rv	4.9266	6889.6								region	JPN	COG-rv	1.6896	6894.09
	region	IND	COO-rv	4.9266	6893.78								region	JPN	COG-rv	1.6896	6894.14
	region	OSA	COO-rv	4.9266	6893.78								region	PAS	COG-rv	1.6896	6894.14
	region	OSA	COO-rv	4.9266	6894.04								region	PAS	COG-rv	1.6896	6916.64
	region	OCN	COO-rv	4.9266	6894.04								region	LAC	COG-rv	1.6896	6916.64
	region	OCN	COO-rv	4.9266	6898.16								region	LAC	COG-rv	1.6896	6928.6
	region	PAS	COO-rv	4.9266	6898.16								region	FSU	COG-rs	1.6992	6928.6
	region	PAS	COO-rv	4.9266	6909.71								region	FSU	COG-rs	1.6992	7450.97
	region	LAC	COO-rv	4.9266	6909.71								region	MEE	COG-rs	1.6992	7450.97
	region	LAC	COO-rv	4.9266	6993.5								region	MEE	COG-rs	1.6992	7635.51
	region	USA	COO-rs	4.9266	6993.5								region	FSU	COG-rv	1.77626	7635.51
	region	USA	COO-rs	4.9266	7004.01								region	FSU	COG-rv	1.77626	7825.49
	region	WCA	COO-rs	4.9266	7004.01								region	USA	COG-rv	1.8788	7825.49
	region	WCA	COO-rs	4.9266	7063.9								region	USA	COG-rv	1.8788	7837.75
	region	SAF	COO-rs	4.9266	7063.9								region	CAN	COG-rv	1.8788	7837.75
	region	SAF	COO-rs	4.9266	7075.67								region	CAN	COG-rv	1.8788	7843.19
	region	PAS	COO-rs	4.9266	7075.67								region	WEU	COG-rv	1.8788	7843.19
	region	PAS	COO-rs	4.9266	7079.12								region	WEU	COG-rv	1.8788	7843.2
	region	LAC	COO-rs	4.9266	7079.12								region	EEU	COG-rv	1.8788	7843.2
	region	LAC	COO-rs	4.9266	7094.52								region	EEU	COG-rv	1.8788	7845.93
	region	NAF	COO-rv	5.31	7094.52								region	NAF	COG-rv	1.8788	7845.93
	region	NAF	COO-rv	5.31	7102.42								region	NAF	COG-rv	1.8788	7894.28
	region	FSU	COO-rv	5.395	7102.42								region	EAF	COG-rv	1.8788	7894.28
	region	FSU	COO-rv	5.395	7120.88								region	EAF	COG-rv	1.8788	7894.44
	region	FSU	COO-rs	5.395	7120.88								region	IND	COG-rv	1.8788	7894.44
	region	FSU	COO-rs	5.395	7297.24								region	IND	COG-rv	1.8788	7901.13
	region	MEE	COO-rs	5.395	7297.24								region	OSA	COG-rv	1.8788	7901.13
	region	MEE	COO-rs	5.395	7359.33								region	OSA	COG-rv	1.8788	7903.59
	region	USA	COO-rv	5.5251	7359.33								region	JPN	COG-rv	1.8788	7903.59
	region	USA	COO-rv	5.5251	7392.54								region	JPN	COG-rv	1.8788	7903.64
	region	CAN	COO-rv	5.5251	7392.54								region	PAS	COG-rv	1.8788	7903.64
	region	CAN	COO-rv	5.5251	7394.2								region	PAS	COG-rv	1.8788	7926.14
	region	EEU	COO-rv	5.5251	7394.2								region	LAC	COG-rv	1.8788	7926.14
	region	EEU	COO-rv	5.5251	7394.41								region	LAC	COG-rv	1.8788	7938.1
	region	EAF	COO-rv	5.5251	7394.41								region	FSU	COG-rs	1.88947	7938.1
	region	EAF	COO-rv	5.5251	7395.29								region	FSU	COG-rs	1.88947	8460.47
	region	WCA	COO-rv	5.5251	7395.29								region	MEE	COG-rs	1.88947	8460.47
	region	WCA	COO-rv	5.5251	7412.56								region	MEE	COG-rs	1.88947	8645.02
	region	SAF	COO-rv	5.5251	7412.56								region	WCA	COG-rs	2.0349	8645.02
	region	SAF	COO-rv	5.5251	7426.95								region	WCA	COG-rs	2.0349	8656.47
	region	CHN	COO-rv	5.5251	7426.95								region	SAF	COG-rs	2.0349	8656.47
	region	CHN	COO-rv	5.5251	7428.71								region	SAF	COG-rs	2.0349	8662.46
	region	OEA	COO-rv	5.5251	7428.71								region	CHN	COG-rs	2.0349	8662.46
	region	OEA	COO-rv	5.5251	7429.25								region	CHN	COG-rs	2.0349	8677.47
	region	IND	COO-rv	5.5251	7429.25								region	OEA	COG-rs	2.0349	8677.47
	region	IND	COO-rv	5.5251	7433.43								region	OEA	COG-rs	2.0349	8679.9
	region	OSA	COO-rv	5.5251	7433.43								region	OCN	COG-rs	2.0349	8679.9
	region	OSA	COO-rv	5.5251	7433.69								region	OCN	COG-rs	2.0349	8682.9
	region	OCN	COO-rv	5.5251	7433.69								region	USA	COG-rv	2.068	8682.9
	region	OCN	COO-rv	5.5251	7437.81								region	USA	COG-rv	2.068	8695.17
	region	PAS	COO-rv	5.5251	7437.81								region	CAN	COG-rv	2.068	8695.17
	region	PAS	COO-rv	5.5251	7449.36								region	CAN	COG-rv	2.068	8700.61
	region	LAC	COO-rv	5.5251	7449.36								region	WEU	COG-rv	2.068	8700.61
	region	LAC	COO-rv	5.5251	7533.15								region	WEU	COG-rv	2.068	8700.61
	region	USA	COO-rs	5.5251	7533.15								region	EEU	COG-rv	2.068	8700.61
	region	USA	COO-rs	5.5251	7543.66								region	EEU	COG-rv	2.068	8703.35
	region	WCA	COO-rs	5.5251	7543.66								region	NAF	COG-rv	2.068	8703.35
	region	WCA	COO-rs	5.5251	7603.55								region	NAF	COG-rv	2.068	8751.7
	region	SAF	COO-rs	5.5251	7603.55								region	EAF	COG-rv	2.068	8751.7
	region	SAF	COO-rs	5.5251	7615.32								region	EAF	COG-rv	2.068	8751.85
	region	PAS	COO-rs	5.5251	7615.32								region	IND	COG-rv	2.068	8751.85
	region	PAS	COO-rs	5.5251	7618.77								region	IND	COG-rv	2.068	8758.54
	region	LAC	COO-rs	5.5251	7618.77								region	OSA	COG-rv	2.068	8758.54
	region	LAC	COO-rs	5.5251	7634.17								region	OSA	COG-rv	2.068	8761
	region	NAF	COO-rv	5.92	7634.17								region	JPN	COG-rv	2.068	8761
	region	NAF	COO-rv	5.92	7720.07								region	JPN	COG-rv	2.068	8761.05
	region	FSU	COO-rv	5.93	7720.07								region	PAS	COG-rv	2.068	8761.05
	region	FSU	COO-rv	5.93	7738.53								region	PAS	COG-rv	2.068	8783.55
	region	FSU	COO-rs	5.93	7738.53								region	LAC	COG-rv	2.068	8783.55
	region	FSU	COO-rs	5.93	7914.89								region	LAC	COG-rv	2.068	8795.51
	region	MEE	COO-rs	5.93	7914.89								region	FSU	COG-rs	2.07975	8795.51
	region	MEE	COO-rs	5.93	7976.99								region	FSU	COG-rs	2.07975	9317.89
	region	CAN	COO-rv	6.1236	7976.99								region	MEE	COG-rs	2.07975	9317.89
	region	CAN	COO-rv	6.1236	7982.32								region	MEE	COG-rs	2.07975	9502.43
	region	WEU	COO-rv	6.1236	7982.32								region	USA	COG-rv	2.2572	9502.43
	region	WEU	COO-rv	6.1236	8004.32								region	USA	COG-rv	2.2572	9514.69
	region	EEU	COO-rv	6.1236	8004.32								region	CAN	COG-rv	2.2572	9514.69
	region	EEU	COO-rv	6.1236	8005.61								region	CAN	COG-rv	2.2572	9520.13
	region	EAF	COO-rv	6.1236	8005.61								region	WEU	COG-rv	2.2572	9520.13
	region	EAF	COO-rv	6.1236	8005.65								region	WEU	COG-rv	2.2572	9520.13
	region	CHN	COO-rv	6.1236	8005.65								region	EEU	COG-rv	2.2572	9520.13
	region	CHN	COO-rv	6.1236	8024.9								region	EEU	COG-rv	2.2572	9522.87
	region	OEA	COO-rv	6.1236	8024.9								region	NAF	COG-rv	2.2572	9522.87
	region	OEA	COO-rv	6.1236	8030.85								region	NAF	COG-rv	2.2572	9571.22
	region	IND	COO-rv	6.1236	8030.85								region	EAF	COG-rv	2.2572	9571.22
	region	IND	COO-rv	6.1236	8034.32								region	EAF	COG-rv	2.2572	9571.38
	region	OSA	COO-rv	6.1236	8034.32								region	IND	COG-rv	2.2572	9571.38
	region	OSA	COO-rv	6.1236	8034.53								region	IND	COG-rv	2.2572	9578.07
	region	OCN	COO-rv	6.1236	8034.53								region	OSA	COG-rv	2.2572	9578.07
	region	OCN	COO-rv	6.1236	8035.76								region	OSA	COG-rv	2.2572	9580.53
	region	USA	COO-rs	6.1236	8035.76								region	JPN	COG-rv	2.2572	9580.53
	region	USA	COO-rs	6.1236	8101.17								region	JPN	COG-rv	2.2572	9580.58
	region	CAN	COO-rs	6.1236	8101.17								region	PAS	COG-rv	2.2572	9580.58
	region	CAN	COO-rs	6.1236	8102.44								region	PAS	COG-rv	2.2572	9603.08
	region	WEU	COO-rs	6.1236	8102.44								region	LAC	COG-rv	2.2572	9603.08
	region	WEU	COO-rs	6.1236	8123.57								region	LAC	COG-rv	2.2572	9615.04
	region	EEU	COO-rs	6.1236	8123.57								region	FSU	COG-rs	2.27002	9615.04
	region	EEU	COO-rs	6.1236	8123.98								region	FSU	COG-rs	2.27002	10137.4
	region	EAF	COO-rs	6.1236	8123.98								region	MEE	COG-rs	2.27002	10137.4
	region	EAF	COO-rs	6.1236	8126.8								region	MEE	COG-rs	2.27002	10322
	region	WCA	COO-rs	6.1236	8126.8								region	USA	COG-rs	2.4192	10322
	region	WCA	COO-rs	6.1236	8137.21								region	USA	COG-rs	2.4192	10421.1
	region	SAF	COO-rs	6.1236	8137.21								region	CAN	COG-rs	2.4192	10421.1
	region	SAF	COO-rs	6.1236	8160.6								region	CAN	COG-rs	2.4192	10425.8
	region	CHN	COO-rs	6.1236	8160.6								region	WEU	COG-rs	2.4192	10425.8
	region	CHN	COO-rs	6.1236	8166.7								region	WEU	COG-rs	2.4192	10464.9
	region	OEA	COO-rs	6.1236	8166.7								region	EEU	COG-rs	2.4192	10464.9
	region	OEA	COO-rs	6.1236	8168.72								region	EEU	COG-rs	2.4192	10465.5
	region	IND	COO-rs	6.1236	8168.72								region	WCA	COG-rs	2.4192	10465.5
	region	IND	COO-rs	6.1236	8172.28								region	WCA	COG-rs	2.4192	10493
	region	OSA	COO-rs	6.1236	8172.28								region	SAF	COG-rs	2.4192	10493
	region	OSA	COO-rs	6.1236	8175.01								region	SAF	COG-rs	2.4192	10500.1
	region	OCN	COO-rs	6.1236	8175.01								region	CHN	COG-rs	2.4192	10500.1
	region	OCN	COO-rs	6.1236	8184.98								region	CHN	COG-rs	2.4192	10538.8
	region	PAS	COO-rs	6.1236	8184.98								region	OEA	COG-rs	2.4192	10538.8
	region	PAS	COO-rs	6.1236	8201.3								region	OEA	COG-rs	2.4192	10545.1
	region	LAC	COO-rs	6.1236	8201.3								region	IND	COG-rs	2.4192	10545.1
	region	LAC	COO-rs	6.1236	8316.38								region	IND	COG-rs	2.4192	10547.5
	region	ARC	COO-rs	6.1236	8316.38								region	OSA	COG-rs	2.4192	10547.5
	region	ARC	COO-rs	6.1236	8340.38								region	OSA	COG-rs	2.4192	10557.5
	region	FSU	COO-rv	6.465	8340.38								region	OCN	COG-rs	2.4192	10557.5
	region	FSU	COO-rv	6.465	8358.84								region	OCN	COG-rs	2.4192	10569.8
	region	FSU	COO-rs	6.465	8358.84								region	PAS	COG-rs	2.4192	10569.8
	region	FSU	COO-rs	6.465	8535.2								region	PAS	COG-rs	2.4192	10604.6
	region	MEE	COO-rs	6.465	8535.2								region	LAC	COG-rs	2.4192	10604.6
	region	MEE	COO-rs	6.465	8597.29								region	LAC	COG-rs	2.4192	10645.7
	region	CAN	COO-rv	6.7977	8597.29								region	NAF	COG-rv	2.4464	10645.7
	region	CAN	COO-rv	6.7977	8602.63								region	NAF	COG-rv	2.4464	10654.1
	region	WEU	COO-rv	6.7977	8602.63								region	EAF	COG-rv	2.4464	10654.1
	region	WEU	COO-rv	6.7977	8624.63								region	EAF	COG-rv	2.4464	10654.1
	region	EEU	COO-rv	6.7977	8624.63								region	FSU	COG-rs	2.4603	10654.1
	region	EEU	COO-rv	6.7977	8625.92								region	FSU	COG-rs	2.4603	10990.5
	region	EAF	COO-rv	6.7977	8625.92								region	MEE	COG-rs	2.4603	10990.5
	region	EAF	COO-rv	6.7977	8625.95								region	MEE	COG-rs	2.4603	11064.3
	region	CHN	COO-rv	6.7977	8625.95								region	USA	COG-rs	2.6901	11064.3
	region	CHN	COO-rv	6.7977	8645.2								region	USA	COG-rs	2.6901	11163.5
	region	OEA	COO-rv	6.7977	8645.2								region	CAN	COG-rs	2.6901	11163.5
	region	OEA	COO-rv	6.7977	8651.16								region	CAN	COG-rs	2.6901	11168.1
	region	IND	COO-rv	6.7977	8651.16								region	WEU	COG-rs	2.6901	11168.1
	region	IND	COO-rv	6.7977	8654.62								region	WEU	COG-rs	2.6901	11207.3
	region	OSA	COO-rv	6.7977	8654.62								region	EEU	COG-rs	2.6901	11207.3
	region	OSA	COO-rv	6.7977	8654.83								region	EEU	COG-rs	2.6901	11207.9
	region	OCN	COO-rv	6.7977	8654.83								region	WCA	COG-rs	2.6901	11207.9
	region	OCN	COO-rv	6.7977	8656.06								region	WCA	COG-rs	2.6901	11235.4
	region	USA	COO-rs	6.7977	8656.06								region	SAF	COG-rs	2.6901	11235.4
	region	USA	COO-rs	6.7977	8721.48								region	SAF	COG-rs	2.6901	11242.4
	region	CAN	COO-rs	6.7977	8721.48								region	CHN	COG-rs	2.6901	11242.4
	region	CAN	COO-rs	6.7977	8722.74								region	CHN	COG-rs	2.6901	11281.2
	region	WEU	COO-rs	6.7977	8722.74								region	OEA	COG-rs	2.6901	11281.2
	region	WEU	COO-rs	6.7977	8743.87								region	OEA	COG-rs	2.6901	11287.5
	region	EEU	COO-rs	6.7977	8743.87								region	IND	COG-rs	2.6901	11287.5
	region	EEU	COO-rs	6.7977	8744.28								region	IND	COG-rs	2.6901	11289.9
	region	EAF	COO-rs	6.7977	8744.28								region	OSA	COG-rs	2.6901	11289.9
	region	EAF	COO-rs	6.7977	8747.11								region	OSA	COG-rs	2.6901	11299.8
	region	WCA	COO-rs	6.7977	8747.11								region	OCN	COG-rs	2.6901	11299.8
	region	WCA	COO-rs	6.7977	8757.52								region	OCN	COG-rs	2.6901	11312.2
	region	SAF	COO-rs	6.7977	8757.52								region	PAS	COG-rs	2.6901	11312.2
	region	SAF	COO-rs	6.7977	8780.91								region	PAS	COG-rs	2.6901	11347
	region	CHN	COO-rs	6.7977	8780.91								region	LAC	COG-rs	2.6901	11347
	region	CHN	COO-rs	6.7977	8787.01								region	LAC	COG-rs	2.6901	11388.1
	region	OEA	COO-rs	6.7977	8787.01								region	NAF	COG-rv	2.9348	11388.1
	region	OEA	COO-rs	6.7977	8789.02								region	NAF	COG-rv	2.9348	11396.5
	region	IND	COO-rs	6.7977	8789.02								region	EAF	COG-rv	2.9348	11396.5
	region	IND	COO-rs	6.7977	8792.59								region	EAF	COG-rv	2.9348	11396.5
	region	OSA	COO-rs	6.7977	8792.59								region	FSU	COG-rs	2.95147	11396.5
	region	OSA	COO-rs	6.7977	8795.31								region	FSU	COG-rs	2.95147	11732.9
	region	OCN	COO-rs	6.7977	8795.31								region	MEE	COG-rs	2.95147	11732.9
	region	OCN	COO-rs	6.7977	8805.29								region	MEE	COG-rs	2.95147	11806.7
	region	PAS	COO-rs	6.7977	8805.29								region	USA	COG-rs	2.961	11806.7
	region	PAS	COO-rs	6.7977	8821.61								region	USA	COG-rs	2.961	11905.8
	region	LAC	COO-rs	6.7977	8821.61								region	CAN	COG-rs	2.961	11905.8
	region	LAC	COO-rs	6.7977	8936.69								region	CAN	COG-rs	2.961	11910.5
	region	ARC	COO-rs	6.7977	8936.69								region	WEU	COG-rs	2.961	11910.5
	region	ARC	COO-rs	6.7977	8960.68								region	WEU	COG-rs	2.961	11949.6
	region	NAF	COO-rv	6.87	8960.68								region	EEU	COG-rs	2.961	11949.6
	region	NAF	COO-rv	6.87	9046.58								region	EEU	COG-rs	2.961	11950.3
	region	USA	EHO-rv	6.94372	9046.58								region	WCA	COG-rs	2.961	11950.3
	region	USA	EHO-rv	6.94372	9050.97								region	WCA	COG-rs	2.961	11977.7
	region	CAN	EHO-rv	6.94372	9050.97								region	SAF	COG-rs	2.961	11977.7
	region	CAN	EHO-rv	6.94372	9050.98								region	SAF	COG-rs	2.961	11984.8
	region	WEU	EHO-rv	6.94372	9050.98								region	CHN	COG-rs	2.961	11984.8
	region	WEU	EHO-rv	6.94372	9051.01								region	CHN	COG-rs	2.961	12023.6
	region	EEU	EHO-rv	6.94372	9051.01								region	OEA	COG-rs	2.961	12023.6
	region	EEU	EHO-rv	6.94372	9051.02								region	OEA	COG-rs	2.961	12029.9
	region	CHN	EHO-rv	6.94372	9051.02								region	IND	COG-rs	2.961	12029.9
	region	CHN	EHO-rv	6.94372	9051.51								region	IND	COG-rs	2.961	12032.3
	region	LAC	EHO-rv	6.94372	9051.51								region	OSA	COG-rs	2.961	12032.3
	region	LAC	EHO-rv	6.94372	9073.7								region	OSA	COG-rs	2.961	12042.2
	region	CAN	TAO-rv	6.94372	9073.7								region	OCN	COG-rs	2.961	12042.2
	region	CAN	TAO-rv	6.94372	9149.55								region	OCN	COG-rs	2.961	12054.6
	region	WEU	TAO-rv	6.94372	9149.55								region	PAS	COG-rs	2.961	12054.6
	region	WEU	TAO-rv	6.94372	9149.59								region	PAS	COG-rs	2.961	12089.4
	region	WCA	TAO-rv	6.94372	9149.59								region	LAC	COG-rs	2.961	12089.4
	region	WCA	TAO-rv	6.94372	9149.99								region	LAC	COG-rs	2.961	12130.4
	region	SAF	TAO-rv	6.94372	9149.99								region	USA	COG-rs	3.2319	12130.4
	region	SAF	TAO-rv	6.94372	9150.3								region	USA	COG-rs	3.2319	12229.6
	region	PAS	TAO-rv	6.94372	9150.3								region	CAN	COG-rs	3.2319	12229.6
	region	PAS	TAO-rv	6.94372	9150.45								region	CAN	COG-rs	3.2319	12234.2
	region	USA	SHO-rv	6.94372	9150.45								region	WEU	COG-rs	3.2319	12234.2
	region	USA	SHO-rv	6.94372	9240.81								region	WEU	COG-rs	3.2319	12273.4
	region	WEU	SHO-rv	6.94372	9240.81								region	EEU	COG-rs	3.2319	12273.4
	region	WEU	SHO-rv	6.94372	9241								region	EEU	COG-rs	3.2319	12274
	region	EEU	SHO-rv	6.94372	9241								region	WCA	COG-rs	3.2319	12274
	region	EEU	SHO-rv	6.94372	9241								region	WCA	COG-rs	3.2319	12301.5
	region	CHN	SHO-rv	6.94372	9241								region	SAF	COG-rs	3.2319	12301.5
	region	CHN	SHO-rv	6.94372	9241.79								region	SAF	COG-rs	3.2319	12308.6
	region	OCN	SHO-rv	6.94372	9241.79								region	CHN	COG-rs	3.2319	12308.6
	region	OCN	SHO-rv	6.94372	9242.86								region	CHN	COG-rs	3.2319	12347.3
	region	PAS	SHO-rv	6.94372	9242.86								region	OEA	COG-rs	3.2319	12347.3
	region	PAS	SHO-rv	6.94372	9243.37								region	OEA	COG-rs	3.2319	12353.6
	region	LAC	SHO-rv	6.94372	9243.37								region	IND	COG-rs	3.2319	12353.6
	region	LAC	SHO-rv	6.94372	9243.83								region	IND	COG-rs	3.2319	12356
	region	FSU	COO-rs	7	9243.83								region	OSA	COG-rs	3.2319	12356
	region	FSU	COO-rs	7	9319.47								region	OSA	COG-rs	3.2319	12366
	region	CAN	COO-rv	7.4718	9319.47								region	OCN	COG-rs	3.2319	12366
	region	CAN	COO-rv	7.4718	9324.81								region	OCN	COG-rs	3.2319	12378.3
	region	WEU	COO-rv	7.4718	9324.81								region	PAS	COG-rs	3.2319	12378.3
	region	WEU	COO-rv	7.4718	9346.81								region	PAS	COG-rs	3.2319	12413.1
	region	EEU	COO-rv	7.4718	9346.81								region	LAC	COG-rs	3.2319	12413.1
	region	EEU	COO-rv	7.4718	9348.1								region	LAC	COG-rs	3.2319	12454.2
	region	EAF	COO-rv	7.4718	9348.1								region	NAF	COG-rv	3.4232	12454.2
	region	EAF	COO-rv	7.4718	9348.13								region	NAF	COG-rv	3.4232	12462.6
	region	CHN	COO-rv	7.4718	9348.13								region	EAF	COG-rv	3.4232	12462.6
	region	CHN	COO-rv	7.4718	9367.38								region	EAF	COG-rv	3.4232	12462.6
	region	OEA	COO-rv	7.4718	9367.38								region	FSU	COG-rs	3.44265	12462.6
	region	OEA	COO-rv	7.4718	9373.34								region	FSU	COG-rs	3.44265	12799
	region	IND	COO-rv	7.4718	9373.34								region	MEE	COG-rs	3.44265	12799
	region	IND	COO-rv	7.4718	9376.8								region	MEE	COG-rs	3.44265	12872.8
	region	OSA	COO-rv	7.4718	9376.8								region	USA	CMG-rv	3.45	12872.8
	region	OSA	COO-rv	7.4718	9377.01								region	USA	CMG-rv	3.45	13021.8
	region	OCN	COO-rv	7.4718	9377.01								region	CAN	CMG-rv	3.45	13021.8
	region	OCN	COO-rv	7.4718	9378.24								region	CAN	CMG-rv	3.45	13063.5
	region	USA	COO-rs	7.4718	9378.24								region	WEU	CMG-rv	3.45	13063.5
	region	USA	COO-rs	7.4718	9443.66								region	WEU	CMG-rv	3.45	13105.3
	region	CAN	COO-rs	7.4718	9443.66								region	EEU	CMG-rv	3.45	13105.3
	region	CAN	COO-rs	7.4718	9444.92								region	EEU	CMG-rv	3.45	13117.3
	region	WEU	COO-rs	7.4718	9444.92								region	FSU	CMG-rv	3.45	13117.3
	region	WEU	COO-rs	7.4718	9466.05								region	FSU	CMG-rv	3.45	13236.5
	region	EEU	COO-rs	7.4718	9466.05								region	NAF	CMG-rv	3.45	13236.5
	region	EEU	COO-rs	7.4718	9466.46								region	NAF	CMG-rv	3.45	13260.3
	region	EAF	COO-rs	7.4718	9466.46								region	EAF	CMG-rv	3.45	13260.3
	region	EAF	COO-rs	7.4718	9469.29								region	EAF	CMG-rv	3.45	13272.3
	region	WCA	COO-rs	7.4718	9469.29								region	WCA	CMG-rv	3.45	13272.3
	region	WCA	COO-rs	7.4718	9479.7								region	WCA	CMG-rv	3.45	13284.3
	region	SAF	COO-rs	7.4718	9479.7								region	SAF	CMG-rv	3.45	13284.3
	region	SAF	COO-rs	7.4718	9503.09								region	SAF	CMG-rv	3.45	13296.3
	region	CHN	COO-rs	7.4718	9503.09								region	MEE	CMG-rv	3.45	13296.3
	region	CHN	COO-rs	7.4718	9509.19								region	MEE	CMG-rv	3.45	13308.3
	region	OEA	COO-rs	7.4718	9509.19								region	CHN	CMG-rv	3.45	13308.3
	region	OEA	COO-rs	7.4718	9511.2								region	CHN	CMG-rv	3.45	13397.8
	region	IND	COO-rs	7.4718	9511.2								region	IND	CMG-rv	3.45	13397.8
	region	IND	COO-rs	7.4718	9514.76								region	IND	CMG-rv	3.45	13439.5
	region	OSA	COO-rs	7.4718	9514.76								region	OSA	CMG-rv	3.45	13439.5
	region	OSA	COO-rs	7.4718	9517.49								region	OSA	CMG-rv	3.45	13445.5
	region	OCN	COO-rs	7.4718	9517.49								region	JPN	CMG-rv	3.45	13445.5
	region	OCN	COO-rs	7.4718	9527.46								region	JPN	CMG-rv	3.45	13451.4
	region	PAS	COO-rs	7.4718	9527.46								region	OCN	CMG-rv	3.45	13451.4
	region	PAS	COO-rs	7.4718	9543.79								region	OCN	CMG-rv	3.45	13481.1
	region	LAC	COO-rs	7.4718	9543.79								region	PAS	CMG-rv	3.45	13481.1
	region	LAC	COO-rs	7.4718	9658.87								region	PAS	CMG-rv	3.45	13487.1
	region	ARC	COO-rs	7.4718	9658.87								region	LAC	CMG-rv	3.45	13487.1
	region	ARC	COO-rs	7.4718	9682.86								region	LAC	CMG-rv	3.45	13522.9
	region	NAF	COO-rv	7.82	9682.86								region	USA	TIG-rv	3.45	13522.9
	region	NAF	COO-rv	7.82	9768.76								region	USA	TIG-rv	3.45	13701.8
	region	FSU	COO-rs	7.855	9768.76								region	CAN	TIG-rv	3.45	13701.8
	region	FSU	COO-rs	7.855	9844.4								region	CAN	TIG-rv	3.45	13791.2
	region	FSU	EHO-rv	7.89474	9844.4								region	WEU	TIG-rv	3.45	13791.2
	region	FSU	EHO-rv	7.89474	9844.45								region	WEU	TIG-rv	3.45	13815.1
	region	NAF	EHO-rv	7.89474	9844.45								region	EEU	TIG-rv	3.45	13815.1
	region	NAF	EHO-rv	7.89474	9844.47								region	EEU	TIG-rv	3.45	13838.9
	region	MEE	EHO-rv	7.89474	9844.47								region	FSU	TIG-rv	3.45	13838.9
	region	MEE	EHO-rv	7.89474	9844.48								region	FSU	TIG-rv	3.45	14005.8
	region	FSU	TAO-rv	7.89474	9844.48								region	NAF	TIG-rv	3.45	14005.8
	region	FSU	TAO-rv	7.89474	9887.68								region	NAF	TIG-rv	3.45	14053.5
	region	FSU	SHO-rv	7.89474	9887.68								region	EAF	TIG-rv	3.45	14053.5
	region	FSU	SHO-rv	7.89474	9888.27								region	EAF	TIG-rv	3.45	14077.3
	region	NAF	SHO-rv	7.89474	9888.27								region	WCA	TIG-rv	3.45	14077.3
	region	NAF	SHO-rv	7.89474	9888.71								region	WCA	TIG-rv	3.45	14148.8
	region	MEE	SHO-rv	7.89474	9888.71								region	SAF	TIG-rv	3.45	14148.8
	region	MEE	SHO-rv	7.89474	9898.28								region	SAF	TIG-rv	3.45	14166.7
	region	CAN	COO-rv	8.1459	9898.28								region	MEE	TIG-rv	3.45	14166.7
	region	CAN	COO-rv	8.1459	9903.62								region	MEE	TIG-rv	3.45	14256.2
	region	WEU	COO-rv	8.1459	9903.62								region	CHN	TIG-rv	3.45	14256.2
	region	WEU	COO-rv	8.1459	9925.62								region	CHN	TIG-rv	3.45	14274.1
	region	EEU	COO-rv	8.1459	9925.62								region	OEA	TIG-rv	3.45	14274.1
	region	EEU	COO-rv	8.1459	9926.91								region	OEA	TIG-rv	3.45	14292
	region	EAF	COO-rv	8.1459	9926.91								region	IND	TIG-rv	3.45	14292
	region	EAF	COO-rv	8.1459	9926.94								region	IND	TIG-rv	3.45	14309.9
	region	CHN	COO-rv	8.1459	9926.94								region	OSA	TIG-rv	3.45	14309.9
	region	CHN	COO-rv	8.1459	9946.19								region	OSA	TIG-rv	3.45	14345.8
	region	OEA	COO-rv	8.1459	9946.19								region	OCN	TIG-rv	3.45	14345.8
	region	OEA	COO-rv	8.1459	9952.15								region	OCN	TIG-rv	3.45	14369.6
	region	IND	COO-rv	8.1459	9952.15								region	PAS	TIG-rv	3.45	14369.6
	region	IND	COO-rv	8.1459	9955.61								region	PAS	TIG-rv	3.45	14405.5
	region	OSA	COO-rv	8.1459	9955.61								region	LAC	TIG-rv	3.45	14405.5
	region	OSA	COO-rv	8.1459	9955.82								region	LAC	TIG-rv	3.45	14441.3
	region	OCN	COO-rv	8.1459	9955.82								region	USA	COG-rs	3.5028	14441.3
	region	OCN	COO-rv	8.1459	9957.05								region	USA	COG-rs	3.5028	14502.7
	region	USA	COO-rs	8.1459	9957.05								region	CAN	COG-rs	3.5028	14502.7
	region	USA	COO-rs	8.1459	10022.5								region	CAN	COG-rs	3.5028	14532.7
	region	CAN	COO-rs	8.1459	10022.5								region	WEU	COG-rs	3.5028	14532.7
	region	CAN	COO-rs	8.1459	10023.7								region	WEU	COG-rs	3.5028	14552.2
	region	WEU	COO-rs	8.1459	10023.7								region	EEU	COG-rs	3.5028	14552.2
	region	WEU	COO-rs	8.1459	10044.9								region	EEU	COG-rs	3.5028	14554.9
	region	EEU	COO-rs	8.1459	10044.9								region	NAF	COG-rs	3.5028	14554.9
	region	EEU	COO-rs	8.1459	10045.3								region	NAF	COG-rs	3.5028	14611.1
	region	EAF	COO-rs	8.1459	10045.3								region	EAF	COG-rs	3.5028	14611.1
	region	EAF	COO-rs	8.1459	10048.1								region	EAF	COG-rs	3.5028	14614.9
	region	WCA	COO-rs	8.1459	10048.1								region	WCA	COG-rs	3.5028	14614.9
	region	WCA	COO-rs	8.1459	10058.5								region	WCA	COG-rs	3.5028	14621.8
	region	SAF	COO-rs	8.1459	10058.5								region	SAF	COG-rs	3.5028	14621.8
	region	SAF	COO-rs	8.1459	10081.9								region	SAF	COG-rs	3.5028	14625.1
	region	CHN	COO-rs	8.1459	10081.9								region	CHN	COG-rs	3.5028	14625.1
	region	CHN	COO-rs	8.1459	10088								region	CHN	COG-rs	3.5028	14644.5
	region	OEA	COO-rs	8.1459	10088								region	OEA	COG-rs	3.5028	14644.5
	region	OEA	COO-rs	8.1459	10090								region	OEA	COG-rs	3.5028	14647.6
	region	IND	COO-rs	8.1459	10090								region	IND	COG-rs	3.5028	14647.6
	region	IND	COO-rs	8.1459	10093.6								region	IND	COG-rs	3.5028	14651.2
	region	OSA	COO-rs	8.1459	10093.6								region	OSA	COG-rs	3.5028	14651.2
	region	OSA	COO-rs	8.1459	10096.3								region	OSA	COG-rs	3.5028	14658.6
	region	OCN	COO-rs	8.1459	10096.3								region	OCN	COG-rs	3.5028	14658.6
	region	OCN	COO-rs	8.1459	10106.3								region	OCN	COG-rs	3.5028	14662.7
	region	PAS	COO-rs	8.1459	10106.3								region	PAS	COG-rs	3.5028	14662.7
	region	PAS	COO-rs	8.1459	10122.6								region	PAS	COG-rs	3.5028	14697.1
	region	LAC	COO-rs	8.1459	10122.6								region	LAC	COG-rs	3.5028	14697.1
	region	LAC	COO-rs	8.1459	10237.7								region	LAC	COG-rs	3.5028	14734.2
	region	ARC	COO-rs	8.1459	10237.7								region	NAF	COG-rv	3.9116	14734.2
	region	ARC	COO-rs	8.1459	10261.7								region	NAF	COG-rv	3.9116	14742.6
	region	USA	EHO-rv	8.68056	10261.7								region	EAF	COG-rv	3.9116	14742.6
	region	USA	EHO-rv	8.68056	10268.3								region	EAF	COG-rv	3.9116	14742.7
	region	CAN	EHO-rv	8.68056	10268.3								region	FSU	COG-rs	3.93383	14742.7
	region	CAN	EHO-rv	8.68056	10268.3								region	FSU	COG-rs	3.93383	15079
	region	WEU	EHO-rv	8.68056	10268.3								region	MEE	COG-rs	3.93383	15079
	region	WEU	EHO-rv	8.68056	10268.4								region	MEE	COG-rs	3.93383	15152.9
	region	EEU	EHO-rv	8.68056	10268.4								region	USA	COG-rs	4.2021	15152.9
	region	EEU	EHO-rv	8.68056	10268.4								region	USA	COG-rs	4.2021	15214.2
	region	CHN	EHO-rv	8.68056	10268.4								region	CAN	COG-rs	4.2021	15214.2
	region	CHN	EHO-rv	8.68056	10268.9								region	CAN	COG-rs	4.2021	15244.2
	region	LAC	EHO-rv	8.68056	10268.9								region	WEU	COG-rs	4.2021	15244.2
	region	LAC	EHO-rv	8.68056	10304.4								region	WEU	COG-rs	4.2021	15263.8
	region	CAN	TAO-rv	8.68056	10304.4								region	EEU	COG-rs	4.2021	15263.8
	region	CAN	TAO-rv	8.68056	10418.2								region	EEU	COG-rs	4.2021	15266.4
	region	WEU	TAO-rv	8.68056	10418.2								region	NAF	COG-rs	4.2021	15266.4
	region	WEU	TAO-rv	8.68056	10418.3								region	NAF	COG-rs	4.2021	15322.6
	region	EAF	TAO-rv	8.68056	10418.3								region	EAF	COG-rs	4.2021	15322.6
	region	EAF	TAO-rv	8.68056	10418.4								region	EAF	COG-rs	4.2021	15326.5
	region	WCA	TAO-rv	8.68056	10418.4								region	WCA	COG-rs	4.2021	15326.5
	region	WCA	TAO-rv	8.68056	10418.8								region	WCA	COG-rs	4.2021	15333.3
	region	SAF	TAO-rv	8.68056	10418.8								region	SAF	COG-rs	4.2021	15333.3
	region	SAF	TAO-rv	8.68056	10419								region	SAF	COG-rs	4.2021	15336.6
	region	PAS	TAO-rv	8.68056	10419								region	CHN	COG-rs	4.2021	15336.6
	region	PAS	TAO-rv	8.68056	10419.4								region	CHN	COG-rs	4.2021	15356
	region	USA	SHO-rv	8.68056	10419.4								region	OEA	COG-rs	4.2021	15356
	region	USA	SHO-rv	8.68056	10554.9								region	OEA	COG-rs	4.2021	15359.2
	region	WEU	SHO-rv	8.68056	10554.9								region	IND	COG-rs	4.2021	15359.2
	region	WEU	SHO-rv	8.68056	10555.4								region	IND	COG-rs	4.2021	15362.8
	region	EEU	SHO-rv	8.68056	10555.4								region	OSA	COG-rs	4.2021	15362.8
	region	EEU	SHO-rv	8.68056	10555.4								region	OSA	COG-rs	4.2021	15370.2
	region	CHN	SHO-rv	8.68056	10555.4								region	OCN	COG-rs	4.2021	15370.2
	region	CHN	SHO-rv	8.68056	10556.2								region	OCN	COG-rs	4.2021	15374.3
	region	OCN	SHO-rv	8.68056	10556.2								region	PAS	COG-rs	4.2021	15374.3
	region	OCN	SHO-rv	8.68056	10559								region	PAS	COG-rs	4.2021	15408.6
	region	PAS	SHO-rv	8.68056	10559								region	LAC	COG-rs	4.2021	15408.6
	region	PAS	SHO-rv	8.68056	10560.4								region	LAC	COG-rs	4.2021	15445.8
	region	LAC	SHO-rv	8.68056	10560.4								region	USA	CMG-rv	4.255	15445.8
	region	LAC	SHO-rv	8.68056	10561.1								region	USA	CMG-rv	4.255	15632
	region	FSU	COO-rs	8.71	10561.1								region	CAN	CMG-rv	4.255	15632
	region	FSU	COO-rs	8.71	10636.8								region	CAN	CMG-rv	4.255	15684.2
	region	NAF	COO-rv	8.77	10636.8								region	WEU	CMG-rv	4.255	15684.2
	region	NAF	COO-rv	8.77	10722.7								region	WEU	CMG-rv	4.255	15736.4
	region	USA	COO-rs	8.82	10722.7								region	EEU	CMG-rv	4.255	15736.4
	region	USA	COO-rs	8.82	10751.7								region	EEU	CMG-rv	4.255	15751.4
	region	CAN	COO-rs	8.82	10751.7								region	FSU	CMG-rv	4.255	15751.4
	region	CAN	COO-rs	8.82	10775.7								region	FSU	CMG-rv	4.255	15900.4
	region	WEU	COO-rs	8.82	10775.7								region	NAF	CMG-rv	4.255	15900.4
	region	WEU	COO-rs	8.82	10801.1								region	NAF	CMG-rv	4.255	15930.2
	region	EEU	COO-rs	8.82	10801.1								region	EAF	CMG-rv	4.255	15930.2
	region	EEU	COO-rs	8.82	10803.9								region	EAF	CMG-rv	4.255	15945.2
	region	EAF	COO-rs	8.82	10803.9								region	WCA	CMG-rv	4.255	15945.2
	region	EAF	COO-rs	8.82	10804.4								region	WCA	CMG-rv	4.255	15960.2
	region	WCA	COO-rs	8.82	10804.4								region	SAF	CMG-rv	4.255	15960.2
	region	WCA	COO-rs	8.82	10809.6								region	SAF	CMG-rv	4.255	15975.2
	region	SAF	COO-rs	8.82	10809.6								region	MEE	CMG-rv	4.255	15975.2
	region	SAF	COO-rs	8.82	10811.9								region	MEE	CMG-rv	4.255	15990.2
	region	CHN	COO-rs	8.82	10811.9								region	CHN	CMG-rv	4.255	15990.2
	region	CHN	COO-rs	8.82	10830								region	CHN	CMG-rv	4.255	16102
	region	OEA	COO-rs	8.82	10830								region	IND	CMG-rv	4.255	16102
	region	OEA	COO-rs	8.82	10836								region	IND	CMG-rv	4.255	16154.2
	region	IND	COO-rs	8.82	10836								region	OSA	CMG-rv	4.255	16154.2
	region	IND	COO-rs	8.82	10836.7								region	OSA	CMG-rv	4.255	16161.6
	region	OSA	COO-rs	8.82	10836.7								region	JPN	CMG-rv	4.255	16161.6
	region	OSA	COO-rs	8.82	10837.2								region	JPN	CMG-rv	4.255	16169
	region	OCN	COO-rs	8.82	10837.2								region	OCN	CMG-rv	4.255	16169
	region	OCN	COO-rs	8.82	10838.3								region	OCN	CMG-rv	4.255	16206.2
	region	PAS	COO-rs	8.82	10838.3								region	PAS	CMG-rv	4.255	16206.2
	region	PAS	COO-rs	8.82	10840.5								region	PAS	CMG-rv	4.255	16213.6
	region	LAC	COO-rs	8.82	10840.5								region	LAC	CMG-rv	4.255	16213.6
	region	LAC	COO-rs	8.82	10863.5								region	LAC	CMG-rv	4.255	16258.4
	region	ARC	COO-rs	8.82	10863.5								region	USA	TIG-rv	4.255	16258.4
	region	ARC	COO-rs	8.82	10935.5								region	USA	TIG-rv	4.255	16482
	region	FSU	COO-rs	9.565	10935.5								region	CAN	TIG-rv	4.255	16482
	region	FSU	COO-rs	9.565	11011.1								region	CAN	TIG-rv	4.255	16593.8
	region	NAF	COO-rv	9.72	11011.1								region	WEU	TIG-rv	4.255	16593.8
	region	NAF	COO-rv	9.72	11014.3								region	WEU	TIG-rv	4.255	16623.6
	region	NAF	COO-rs	9.72	11014.3								region	EEU	TIG-rv	4.255	16623.6
	region	NAF	COO-rs	9.72	11054.4								region	EEU	TIG-rv	4.255	16653.4
	region	USA	COO-rs	9.8973	11054.4								region	FSU	TIG-rv	4.255	16653.4
	region	USA	COO-rs	9.8973	11083.4								region	FSU	TIG-rv	4.255	16862
	region	CAN	COO-rs	9.8973	11083.4								region	NAF	TIG-rv	4.255	16862
	region	CAN	COO-rs	9.8973	11107.4								region	NAF	TIG-rv	4.255	16921.6
	region	WEU	COO-rs	9.8973	11107.4								region	EAF	TIG-rv	4.255	16921.6
	region	WEU	COO-rs	9.8973	11132.8								region	EAF	TIG-rv	4.255	16951.4
	region	EEU	COO-rs	9.8973	11132.8								region	WCA	TIG-rv	4.255	16951.4
	region	EEU	COO-rs	9.8973	11135.6								region	WCA	TIG-rv	4.255	17040.8
	region	EAF	COO-rs	9.8973	11135.6								region	SAF	TIG-rv	4.255	17040.8
	region	EAF	COO-rs	9.8973	11136.1								region	SAF	TIG-rv	4.255	17063.2
	region	WCA	COO-rs	9.8973	11136.1								region	MEE	TIG-rv	4.255	17063.2
	region	WCA	COO-rs	9.8973	11141.3								region	MEE	TIG-rv	4.255	17175
	region	SAF	COO-rs	9.8973	11141.3								region	CHN	TIG-rv	4.255	17175
	region	SAF	COO-rs	9.8973	11143.6								region	CHN	TIG-rv	4.255	17197.4
	region	CHN	COO-rs	9.8973	11143.6								region	OEA	TIG-rv	4.255	17197.4
	region	CHN	COO-rs	9.8973	11161.8								region	OEA	TIG-rv	4.255	17219.8
	region	OEA	COO-rs	9.8973	11161.8								region	IND	TIG-rv	4.255	17219.8
	region	OEA	COO-rs	9.8973	11167.7								region	IND	TIG-rv	4.255	17242.2
	region	IND	COO-rs	9.8973	11167.7								region	OSA	TIG-rv	4.255	17242.2
	region	IND	COO-rs	9.8973	11168.4								region	OSA	TIG-rv	4.255	17287
	region	OSA	COO-rs	9.8973	11168.4								region	OCN	TIG-rv	4.255	17287
	region	OSA	COO-rs	9.8973	11169								region	OCN	TIG-rv	4.255	17316.8
	region	OCN	COO-rs	9.8973	11169								region	PAS	TIG-rv	4.255	17316.8
	region	OCN	COO-rs	9.8973	11170								region	PAS	TIG-rv	4.255	17361.6
	region	PAS	COO-rs	9.8973	11170								region	LAC	TIG-rv	4.255	17361.6
	region	PAS	COO-rs	9.8973	11172.2								region	LAC	TIG-rv	4.255	17406.4
	region	LAC	COO-rs	9.8973	11172.2								region	USA	SHG-rv	4.41	17406.4
	region	LAC	COO-rs	9.8973	11195.2								region	USA	SHG-rv	4.41	17618.8
	region	ARC	COO-rs	9.8973	11195.2								region	CAN	SHG-rv	4.41	17618.8
	region	ARC	COO-rs	9.8973	11267.2								region	CAN	SHG-rv	4.41	17640
	region	USA	EHO-rv	10.4174	11267.2								region	WEU	SHG-rv	4.41	17640
	region	USA	EHO-rv	10.4174	11278.2								region	WEU	SHG-rv	4.41	17665.5
	region	CAN	EHO-rv	10.4174	11278.2								region	EEU	SHG-rv	4.41	17665.5
	region	CAN	EHO-rv	10.4174	11278.2								region	EEU	SHG-rv	4.41	17691
	region	WEU	EHO-rv	10.4174	11278.2								region	FSU	SHG-rv	4.41	17691
	region	WEU	EHO-rv	10.4174	11278.4								region	FSU	SHG-rv	4.41	17945.8
	region	EEU	EHO-rv	10.4174	11278.4								region	NAF	SHG-rv	4.41	17945.8
	region	EEU	EHO-rv	10.4174	11278.5								region	NAF	SHG-rv	4.41	17962.8
	region	CHN	EHO-rv	10.4174	11278.5								region	EAF	SHG-rv	4.41	17962.8
	region	CHN	EHO-rv	10.4174	11279.1								region	EAF	SHG-rv	4.41	17971.4
	region	LAC	EHO-rv	10.4174	11279.1								region	WCA	SHG-rv	4.41	17971.4
	region	LAC	EHO-rv	10.4174	11310.2								region	WCA	SHG-rv	4.41	18005.3
	region	CAN	TAO-rv	10.4174	11310.2								region	SAF	SHG-rv	4.41	18005.3
	region	CAN	TAO-rv	10.4174	11499.8								region	SAF	SHG-rv	4.41	18013.9
	region	WEU	TAO-rv	10.4174	11499.8								region	MEE	SHG-rv	4.41	18013.9
	region	WEU	TAO-rv	10.4174	11500.1								region	MEE	SHG-rv	4.41	18030.9
	region	EAF	TAO-rv	10.4174	11500.1								region	CHN	SHG-rv	4.41	18030.9
	region	EAF	TAO-rv	10.4174	11500.5								region	CHN	SHG-rv	4.41	18039.4
	region	WCA	TAO-rv	10.4174	11500.5								region	OEA	SHG-rv	4.41	18039.4
	region	WCA	TAO-rv	10.4174	11501								region	OEA	SHG-rv	4.41	18048
	region	SAF	TAO-rv	10.4174	11501								region	IND	SHG-rv	4.41	18048
	region	SAF	TAO-rv	10.4174	11501.6								region	IND	SHG-rv	4.41	18056.5
	region	PAS	TAO-rv	10.4174	11501.6								region	OSA	SHG-rv	4.41	18056.5
	region	PAS	TAO-rv	10.4174	11502								region	OSA	SHG-rv	4.41	18082
	region	USA	SHO-rv	10.4174	11502								region	OCN	SHG-rv	4.41	18082
	region	USA	SHO-rv	10.4174	11727.9								region	OCN	SHG-rv	4.41	18099
	region	WEU	SHO-rv	10.4174	11727.9								region	PAS	SHG-rv	4.41	18099
	region	WEU	SHO-rv	10.4174	11729.1								region	PAS	SHG-rv	4.41	18107.6
	region	EEU	SHO-rv	10.4174	11729.1								region	LAC	SHG-rv	4.41	18107.6
	region	EEU	SHO-rv	10.4174	11729.1								region	LAC	SHG-rv	4.41	18124.6
	region	CHN	SHO-rv	10.4174	11729.1								region	FSU	COG-rs	4.425	18124.6
	region	CHN	SHO-rv	10.4174	11730.2								region	FSU	COG-rs	4.425	18348.8
	region	OCN	SHO-rv	10.4174	11730.2								region	USA	DEG-rv	4.5	18348.8
	region	OCN	SHO-rv	10.4174	11733.4								region	USA	DEG-rv	4.5	18423.3
	region	PAS	SHO-rv	10.4174	11733.4								region	CAN	DEG-rv	4.5	18423.3
	region	PAS	SHO-rv	10.4174	11734.9								region	CAN	DEG-rv	4.5	18441.9
	region	LAC	SHO-rv	10.4174	11734.9								region	WEU	DEG-rv	4.5	18441.9
	region	LAC	SHO-rv	10.4174	11735.6								region	WEU	DEG-rv	4.5	18453.1
	region	FSU	EHO-rv	10.5263	11735.6								region	EEU	DEG-rv	4.5	18453.1
	region	FSU	EHO-rv	10.5263	11735.6								region	EEU	DEG-rv	4.5	18464.3
	region	NAF	EHO-rv	10.5263	11735.6								region	FSU	DEG-rv	4.5	18464.3
	region	NAF	EHO-rv	10.5263	11735.7								region	FSU	DEG-rv	4.5	18576.1
	region	MEE	EHO-rv	10.5263	11735.7								region	NAF	DEG-rv	4.5	18576.1
	region	MEE	EHO-rv	10.5263	11735.7								region	NAF	DEG-rv	4.5	18613.4
	region	FSU	TAO-rv	10.5263	11735.7								region	EAF	DEG-rv	4.5	18613.4
	region	FSU	TAO-rv	10.5263	11787.5								region	EAF	DEG-rv	4.5	18624.6
	region	FSU	SHO-rv	10.5263	11787.5								region	WCA	DEG-rv	4.5	18624.6
	region	FSU	SHO-rv	10.5263	11788.2								region	WCA	DEG-rv	4.5	18650.7
	region	NAF	SHO-rv	10.5263	11788.2								region	SAF	DEG-rv	4.5	18650.7
	region	NAF	SHO-rv	10.5263	11788.6								region	SAF	DEG-rv	4.5	18658.2
	region	MEE	SHO-rv	10.5263	11788.6								region	MEE	DEG-rv	4.5	18658.2
	region	MEE	SHO-rv	10.5263	11791.2								region	MEE	DEG-rv	4.5	18684.3
	region	NAF	COO-rv	10.79	11791.2								region	CHN	DEG-rv	4.5	18684.3
	region	NAF	COO-rv	10.79	11794.4								region	CHN	DEG-rv	4.5	18691.8
	region	NAF	COO-rs	10.79	11794.4								region	IND	DEG-rv	4.5	18691.8
	region	NAF	COO-rs	10.79	11834.4								region	IND	DEG-rv	4.5	18699.3
	region	USA	COO-rs	10.9746	11834.4								region	OSA	DEG-rv	4.5	18699.3
	region	USA	COO-rs	10.9746	11863.5								region	OSA	DEG-rv	4.5	18717.9
	region	CAN	COO-rs	10.9746	11863.5								region	OCN	DEG-rv	4.5	18717.9
	region	CAN	COO-rs	10.9746	11887.5								region	OCN	DEG-rv	4.5	18725.4
	region	WEU	COO-rs	10.9746	11887.5								region	PAS	DEG-rv	4.5	18725.4
	region	WEU	COO-rs	10.9746	11912.9								region	PAS	DEG-rv	4.5	18732.9
	region	EEU	COO-rs	10.9746	11912.9								region	LAC	DEG-rv	4.5	18732.9
	region	EEU	COO-rs	10.9746	11915.7								region	LAC	DEG-rv	4.5	18755.3
	region	EAF	COO-rs	10.9746	11915.7								region	FSU	COG-rs	4.85865	18755.3
	region	EAF	COO-rs	10.9746	11916.1								region	FSU	COG-rs	4.85865	18979.6
	region	WCA	COO-rs	10.9746	11916.1								region	USA	COG-rs	4.9014	18979.6
	region	WCA	COO-rs	10.9746	11921.3								region	USA	COG-rs	4.9014	19040.9
	region	SAF	COO-rs	10.9746	11921.3								region	CAN	COG-rs	4.9014	19040.9
	region	SAF	COO-rs	10.9746	11923.7								region	CAN	COG-rs	4.9014	19070.9
	region	CHN	COO-rs	10.9746	11923.7								region	WEU	COG-rs	4.9014	19070.9
	region	CHN	COO-rs	10.9746	11941.8								region	WEU	COG-rs	4.9014	19090.5
	region	OEA	COO-rs	10.9746	11941.8								region	EEU	COG-rs	4.9014	19090.5
	region	OEA	COO-rs	10.9746	11947.8								region	EEU	COG-rs	4.9014	19093.1
	region	IND	COO-rs	10.9746	11947.8								region	NAF	COG-rs	4.9014	19093.1
	region	IND	COO-rs	10.9746	11948.5								region	NAF	COG-rs	4.9014	19149.3
	region	OSA	COO-rs	10.9746	11948.5								region	EAF	COG-rs	4.9014	19149.3
	region	OSA	COO-rs	10.9746	11949								region	EAF	COG-rs	4.9014	19153.2
	region	OCN	COO-rs	10.9746	11949								region	WCA	COG-rs	4.9014	19153.2
	region	OCN	COO-rs	10.9746	11950								region	WCA	COG-rs	4.9014	19160
	region	PAS	COO-rs	10.9746	11950								region	SAF	COG-rs	4.9014	19160
	region	PAS	COO-rs	10.9746	11952.3								region	SAF	COG-rs	4.9014	19163.3
	region	LAC	COO-rs	10.9746	11952.3								region	CHN	COG-rs	4.9014	19163.3
	region	LAC	COO-rs	10.9746	11975.3								region	CHN	COG-rs	4.9014	19182.7
	region	ARC	COO-rs	10.9746	11975.3								region	OEA	COG-rs	4.9014	19182.7
	region	ARC	COO-rs	10.9746	12047.3								region	OEA	COG-rs	4.9014	19185.9
	region	NAF	COO-rv	11.86	12047.3								region	IND	COG-rs	4.9014	19185.9
	region	NAF	COO-rv	11.86	12050.5								region	IND	COG-rs	4.9014	19189.5
	region	NAF	COO-rs	11.86	12050.5								region	OSA	COG-rs	4.9014	19189.5
	region	NAF	COO-rs	11.86	12090.5								region	OSA	COG-rs	4.9014	19196.9
	region	USA	COO-rs	12.0519	12090.5								region	OCN	COG-rs	4.9014	19196.9
	region	USA	COO-rs	12.0519	12119.6								region	OCN	COG-rs	4.9014	19201
	region	CAN	COO-rs	12.0519	12119.6								region	PAS	COG-rs	4.9014	19201
	region	CAN	COO-rs	12.0519	12143.6								region	PAS	COG-rs	4.9014	19235.3
	region	WEU	COO-rs	12.0519	12143.6								region	LAC	COG-rs	4.9014	19235.3
	region	WEU	COO-rs	12.0519	12168.9								region	LAC	COG-rs	4.9014	19272.5
	region	EEU	COO-rs	12.0519	12168.9								region	USA	CMG-rv	5.221	19272.5
	region	EEU	COO-rs	12.0519	12171.8								region	USA	CMG-rv	5.221	19495.9
	region	EAF	COO-rs	12.0519	12171.8								region	CAN	CMG-rv	5.221	19495.9
	region	EAF	COO-rs	12.0519	12172.2								region	CAN	CMG-rv	5.221	19558.6
	region	WCA	COO-rs	12.0519	12172.2								region	WEU	CMG-rv	5.221	19558.6
	region	WCA	COO-rs	12.0519	12177.4								region	WEU	CMG-rv	5.221	19621.2
	region	SAF	COO-rs	12.0519	12177.4								region	EEU	CMG-rv	5.221	19621.2
	region	SAF	COO-rs	12.0519	12179.7								region	EEU	CMG-rv	5.221	19639.2
	region	CHN	COO-rs	12.0519	12179.7								region	FSU	CMG-rv	5.221	19639.2
	region	CHN	COO-rs	12.0519	12197.9								region	FSU	CMG-rv	5.221	19818
	region	OEA	COO-rs	12.0519	12197.9								region	NAF	CMG-rv	5.221	19818
	region	OEA	COO-rs	12.0519	12203.9								region	NAF	CMG-rv	5.221	19853.8
	region	IND	COO-rs	12.0519	12203.9								region	EAF	CMG-rv	5.221	19853.8
	region	IND	COO-rs	12.0519	12204.6								region	EAF	CMG-rv	5.221	19871.8
	region	OSA	COO-rs	12.0519	12204.6								region	WCA	CMG-rv	5.221	19871.8
	region	OSA	COO-rs	12.0519	12205.1								region	WCA	CMG-rv	5.221	19889.8
	region	OCN	COO-rs	12.0519	12205.1								region	SAF	CMG-rv	5.221	19889.8
	region	OCN	COO-rs	12.0519	12206.1								region	SAF	CMG-rv	5.221	19907.8
	region	PAS	COO-rs	12.0519	12206.1								region	MEE	CMG-rv	5.221	19907.8
	region	PAS	COO-rs	12.0519	12208.3								region	MEE	CMG-rv	5.221	19925.8
	region	LAC	COO-rs	12.0519	12208.3								region	CHN	CMG-rv	5.221	19925.8
	region	LAC	COO-rs	12.0519	12231.4								region	CHN	CMG-rv	5.221	20059.9
	region	ARC	COO-rs	12.0519	12231.4								region	IND	CMG-rv	5.221	20059.9
	region	ARC	COO-rs	12.0519	12303.3								region	IND	CMG-rv	5.221	20122.6
	region	USA	EHO-rv	12.1542	12303.3								region	OSA	CMG-rv	5.221	20122.6
	region	USA	EHO-rv	12.1542	12312.3								region	OSA	CMG-rv	5.221	20131.4
	region	CAN	EHO-rv	12.1542	12312.3								region	JPN	CMG-rv	5.221	20131.4
	region	CAN	EHO-rv	12.1542	12312.3								region	JPN	CMG-rv	5.221	20140.3
	region	WEU	EHO-rv	12.1542	12312.3								region	OCN	CMG-rv	5.221	20140.3
	region	WEU	EHO-rv	12.1542	12312.3								region	OCN	CMG-rv	5.221	20185
	region	EEU	EHO-rv	12.1542	12312.3								region	PAS	CMG-rv	5.221	20185
	region	EEU	EHO-rv	12.1542	12312.3								region	PAS	CMG-rv	5.221	20193.8
	region	CHN	EHO-rv	12.1542	12312.3								region	LAC	CMG-rv	5.221	20193.8
	region	CHN	EHO-rv	12.1542	12313.4								region	LAC	CMG-rv	5.221	20247.6
	region	LAC	EHO-rv	12.1542	12313.4								region	USA	TIG-rv	5.221	20247.6
	region	LAC	EHO-rv	12.1542	12358.4								region	USA	TIG-rv	5.221	20515.9
	region	CAN	TAO-rv	12.1542	12358.4								region	CAN	TIG-rv	5.221	20515.9
	region	CAN	TAO-rv	12.1542	12512.4								region	CAN	TIG-rv	5.221	20650.1
	region	WEU	TAO-rv	12.1542	12512.4								region	WEU	TIG-rv	5.221	20650.1
	region	WEU	TAO-rv	12.1542	12512.5								region	WEU	TIG-rv	5.221	20685.8
	region	WCA	TAO-rv	12.1542	12512.5								region	EEU	TIG-rv	5.221	20685.8
	region	WCA	TAO-rv	12.1542	12513.3								region	EEU	TIG-rv	5.221	20721.6
	region	SAF	TAO-rv	12.1542	12513.3								region	FSU	TIG-rv	5.221	20721.6
	region	SAF	TAO-rv	12.1542	12513.9								region	FSU	TIG-rv	5.221	20971.9
	region	PAS	TAO-rv	12.1542	12513.9								region	NAF	TIG-rv	5.221	20971.9
	region	PAS	TAO-rv	12.1542	12514.2								region	NAF	TIG-rv	5.221	21043.4
	region	USA	SHO-rv	12.1542	12514.2								region	EAF	TIG-rv	5.221	21043.4
	region	USA	SHO-rv	12.1542	12697.7								region	EAF	TIG-rv	5.221	21079.2
	region	WEU	SHO-rv	12.1542	12697.7								region	WCA	TIG-rv	5.221	21079.2
	region	WEU	SHO-rv	12.1542	12698.1								region	WCA	TIG-rv	5.221	21186.5
	region	EEU	SHO-rv	12.1542	12698.1								region	SAF	TIG-rv	5.221	21186.5
	region	EEU	SHO-rv	12.1542	12698.1								region	SAF	TIG-rv	5.221	21213.4
	region	CHN	SHO-rv	12.1542	12698.1								region	MEE	TIG-rv	5.221	21213.4
	region	CHN	SHO-rv	12.1542	12699.7								region	MEE	TIG-rv	5.221	21347.5
	region	OCN	SHO-rv	12.1542	12699.7								region	CHN	TIG-rv	5.221	21347.5
	region	OCN	SHO-rv	12.1542	12701.9								region	CHN	TIG-rv	5.221	21374.4
	region	PAS	SHO-rv	12.1542	12701.9								region	OEA	TIG-rv	5.221	21374.4
	region	PAS	SHO-rv	12.1542	12702.9								region	OEA	TIG-rv	5.221	21401.3
	region	LAC	SHO-rv	12.1542	12702.9								region	IND	TIG-rv	5.221	21401.3
	region	LAC	SHO-rv	12.1542	12703.8								region	IND	TIG-rv	5.221	21428.2
	region	NAF	COO-rv	12.93	12703.8								region	OSA	TIG-rv	5.221	21428.2
	region	NAF	COO-rv	12.93	12707								region	OSA	TIG-rv	5.221	21481.9
	region	NAF	COO-rs	12.93	12707								region	OCN	TIG-rv	5.221	21481.9
	region	NAF	COO-rs	12.93	12747.1								region	OCN	TIG-rv	5.221	21517.7
	region	FSU	EHO-rv	13.1579	12747.1								region	PAS	TIG-rv	5.221	21517.7
	region	FSU	EHO-rv	13.1579	12747.2								region	PAS	TIG-rv	5.221	21571.4
	region	NAF	EHO-rv	13.1579	12747.2								region	LAC	TIG-rv	5.221	21571.4
	region	NAF	EHO-rv	13.1579	12747.2								region	LAC	TIG-rv	5.221	21625.2
	region	MEE	EHO-rv	13.1579	12747.2								region	FSU	COG-rs	5.2923	21625.2
	region	MEE	EHO-rv	13.1579	12747.2								region	FSU	COG-rs	5.2923	21849.4
	region	FSU	TAO-rv	13.1579	12747.2								region	USA	SHG-rv	5.439	21849.4
	region	FSU	TAO-rv	13.1579	12825								region	USA	SHG-rv	5.439	22114.9
	region	FSU	SHO-rv	13.1579	12825								region	CAN	SHG-rv	5.439	22114.9
	region	FSU	SHO-rv	13.1579	12826								region	CAN	SHG-rv	5.439	22141.4
	region	NAF	SHO-rv	13.1579	12826								region	WEU	SHG-rv	5.439	22141.4
	region	NAF	SHO-rv	13.1579	12826.6								region	WEU	SHG-rv	5.439	22173.4
	region	MEE	SHO-rv	13.1579	12826.6								region	EEU	SHG-rv	5.439	22173.4
	region	MEE	SHO-rv	13.1579	12827.2								region	EEU	SHG-rv	5.439	22205.3
	region	USA	EHO-rv	13.8911	12827.2								region	FSU	SHG-rv	5.439	22205.3
	region	USA	EHO-rv	13.8911	12840.6								region	FSU	SHG-rv	5.439	22523.8
	region	CAN	EHO-rv	13.8911	12840.6								region	NAF	SHG-rv	5.439	22523.8
	region	CAN	EHO-rv	13.8911	12840.6								region	NAF	SHG-rv	5.439	22545
	region	WEU	EHO-rv	13.8911	12840.6								region	EAF	SHG-rv	5.439	22545
	region	WEU	EHO-rv	13.8911	12840.8								region	EAF	SHG-rv	5.439	22555.7
	region	EEU	EHO-rv	13.8911	12840.8								region	WCA	SHG-rv	5.439	22555.7
	region	EEU	EHO-rv	13.8911	12840.9								region	WCA	SHG-rv	5.439	22598.1
	region	CHN	EHO-rv	13.8911	12840.9								region	SAF	SHG-rv	5.439	22598.1
	region	CHN	EHO-rv	13.8911	12841.9								region	SAF	SHG-rv	5.439	22608.8
	region	LAC	EHO-rv	13.8911	12841.9								region	MEE	SHG-rv	5.439	22608.8
	region	LAC	EHO-rv	13.8911	12913.9								region	MEE	SHG-rv	5.439	22630.1
	region	CAN	TAO-rv	13.8911	12913.9								region	CHN	SHG-rv	5.439	22630.1
	region	CAN	TAO-rv	13.8911	13144.9								region	CHN	SHG-rv	5.439	22640.8
	region	WEU	TAO-rv	13.8911	13144.9								region	OEA	SHG-rv	5.439	22640.8
	region	WEU	TAO-rv	13.8911	13145.2								region	OEA	SHG-rv	5.439	22651.4
	region	EAF	TAO-rv	13.8911	13145.2								region	IND	SHG-rv	5.439	22651.4
	region	EAF	TAO-rv	13.8911	13145.4								region	IND	SHG-rv	5.439	22662.1
	region	WCA	TAO-rv	13.8911	13145.4								region	OSA	SHG-rv	5.439	22662.1
	region	WCA	TAO-rv	13.8911	13146.2								region	OSA	SHG-rv	5.439	22694
	region	SAF	TAO-rv	13.8911	13146.2								region	OCN	SHG-rv	5.439	22694
	region	SAF	TAO-rv	13.8911	13146.6								region	OCN	SHG-rv	5.439	22715.3
	region	PAS	TAO-rv	13.8911	13146.6								region	PAS	SHG-rv	5.439	22715.3
	region	PAS	TAO-rv	13.8911	13147.4								region	PAS	SHG-rv	5.439	22726
	region	USA	SHO-rv	13.8911	13147.4								region	LAC	SHG-rv	5.439	22726
	region	USA	SHO-rv	13.8911	13422.6								region	LAC	SHG-rv	5.439	22747.2
	region	WEU	SHO-rv	13.8911	13422.6								region	USA	DEG-rv	5.55	22747.2
	region	WEU	SHO-rv	13.8911	13423.5								region	USA	DEG-rv	5.55	22840.3
	region	EEU	SHO-rv	13.8911	13423.5								region	CAN	DEG-rv	5.55	22840.3
	region	EEU	SHO-rv	13.8911	13423.6								region	CAN	DEG-rv	5.55	22863.6
	region	CHN	SHO-rv	13.8911	13423.6								region	WEU	DEG-rv	5.55	22863.6
	region	CHN	SHO-rv	13.8911	13425.2								region	WEU	DEG-rv	5.55	22877.6
	region	OCN	SHO-rv	13.8911	13425.2								region	EEU	DEG-rv	5.55	22877.6
	region	OCN	SHO-rv	13.8911	13431								region	EEU	DEG-rv	5.55	22891.6
	region	PAS	SHO-rv	13.8911	13431								region	FSU	DEG-rv	5.55	22891.6
	region	PAS	SHO-rv	13.8911	13433.7								region	FSU	DEG-rv	5.55	23031.3
	region	LAC	SHO-rv	13.8911	13433.7								region	NAF	DEG-rv	5.55	23031.3
	region	LAC	SHO-rv	13.8911	13435.2								region	NAF	DEG-rv	5.55	23077.9
	region	NAF	COO-rs	14	13435.2								region	EAF	DEG-rv	5.55	23077.9
	region	NAF	COO-rs	14	13441.2								region	EAF	DEG-rv	5.55	23091.9
	region	USA	EHO-rv	15.6279	13441.2								region	WCA	DEG-rv	5.55	23091.9
	region	USA	EHO-rv	15.6279	13463.5								region	WCA	DEG-rv	5.55	23124.6
	region	CAN	EHO-rv	15.6279	13463.5								region	SAF	DEG-rv	5.55	23124.6
	region	CAN	EHO-rv	15.6279	13463.5								region	SAF	DEG-rv	5.55	23133.9
	region	WEU	EHO-rv	15.6279	13463.5								region	MEE	DEG-rv	5.55	23133.9
	region	WEU	EHO-rv	15.6279	13464								region	MEE	DEG-rv	5.55	23166.6
	region	EEU	EHO-rv	15.6279	13464								region	CHN	DEG-rv	5.55	23166.6
	region	EEU	EHO-rv	15.6279	13464.1								region	CHN	DEG-rv	5.55	23175.9
	region	CHN	EHO-rv	15.6279	13464.1								region	IND	DEG-rv	5.55	23175.9
	region	CHN	EHO-rv	15.6279	13465.4								region	IND	DEG-rv	5.55	23185.3
	region	LAC	EHO-rv	15.6279	13465.4								region	OSA	DEG-rv	5.55	23185.3
	region	LAC	EHO-rv	15.6279	13528.5								region	OSA	DEG-rv	5.55	23208.6
	region	CAN	TAO-rv	15.6279	13528.5								region	OCN	DEG-rv	5.55	23208.6
	region	CAN	TAO-rv	15.6279	13913.5								region	OCN	DEG-rv	5.55	23217.9
	region	WEU	TAO-rv	15.6279	13913.5								region	PAS	DEG-rv	5.55	23217.9
	region	WEU	TAO-rv	15.6279	13914.1								region	PAS	DEG-rv	5.55	23227.3
	region	EAF	TAO-rv	15.6279	13914.1								region	LAC	DEG-rv	5.55	23227.3
	region	EAF	TAO-rv	15.6279	13914.9								region	LAC	DEG-rv	5.55	23255.3
	region	WCA	TAO-rv	15.6279	13914.9								region	USA	COG-rs	5.6007	23255.3
	region	WCA	TAO-rv	15.6279	13915.9								region	USA	COG-rs	5.6007	23316.7
	region	SAF	TAO-rv	15.6279	13915.9								region	CAN	COG-rs	5.6007	23316.7
	region	SAF	TAO-rv	15.6279	13917								region	CAN	COG-rs	5.6007	23346.7
	region	PAS	TAO-rv	15.6279	13917								region	WEU	COG-rs	5.6007	23346.7
	region	PAS	TAO-rv	15.6279	13917.9								region	WEU	COG-rs	5.6007	23366.3
	region	USA	SHO-rv	15.6279	13917.9								region	EEU	COG-rs	5.6007	23366.3
	region	USA	SHO-rv	15.6279	14376.5								region	EEU	COG-rs	5.6007	23368.9
	region	WEU	SHO-rv	15.6279	14376.5								region	NAF	COG-rs	5.6007	23368.9
	region	WEU	SHO-rv	15.6279	14379								region	NAF	COG-rs	5.6007	23425.1
	region	EEU	SHO-rv	15.6279	14379								region	EAF	COG-rs	5.6007	23425.1
	region	EEU	SHO-rv	15.6279	14379								region	EAF	COG-rs	5.6007	23428.9
	region	CHN	SHO-rv	15.6279	14379								region	WCA	COG-rs	5.6007	23428.9
	region	CHN	SHO-rv	15.6279	14381.2								region	WCA	COG-rs	5.6007	23435.8
	region	OCN	SHO-rv	15.6279	14381.2								region	SAF	COG-rs	5.6007	23435.8
	region	OCN	SHO-rv	15.6279	14387.7								region	SAF	COG-rs	5.6007	23439.1
	region	PAS	SHO-rv	15.6279	14387.7								region	CHN	COG-rs	5.6007	23439.1
	region	PAS	SHO-rv	15.6279	14390.8								region	CHN	COG-rs	5.6007	23458.5
	region	LAC	SHO-rv	15.6279	14390.8								region	OEA	COG-rs	5.6007	23458.5
	region	LAC	SHO-rv	15.6279	14392.1								region	OEA	COG-rs	5.6007	23461.6
	region	NAF	COO-rs	15.71	14392.1								region	IND	COG-rs	5.6007	23461.6
	region	NAF	COO-rs	15.71	14398.1								region	IND	COG-rs	5.6007	23465.2
	region	FSU	EHO-rv	15.7895	14398.1								region	OSA	COG-rs	5.6007	23465.2
	region	FSU	EHO-rv	15.7895	14398.2								region	OSA	COG-rs	5.6007	23472.6
	region	NAF	EHO-rv	15.7895	14398.2								region	OCN	COG-rs	5.6007	23472.6
	region	NAF	EHO-rv	15.7895	14398.2								region	OCN	COG-rs	5.6007	23476.7
	region	MEE	EHO-rv	15.7895	14398.2								region	PAS	COG-rs	5.6007	23476.7
	region	MEE	EHO-rv	15.7895	14398.2								region	PAS	COG-rs	5.6007	23511.1
	region	FSU	TAO-rv	15.7895	14398.2								region	LAC	COG-rs	5.6007	23511.1
	region	FSU	TAO-rv	15.7895	14486								region	LAC	COG-rs	5.6007	23548.2
	region	FSU	SHO-rv	15.7895	14486								region	FSU	COG-rs	5.72595	23548.2
	region	FSU	SHO-rv	15.7895	14487.2								region	FSU	COG-rs	5.72595	23772.5
	region	NAF	SHO-rv	15.7895	14487.2								region	USA	COG-rs	6.3	23772.5
	region	NAF	SHO-rv	15.7895	14488								region	USA	COG-rs	6.3	23797
	region	MEE	SHO-rv	15.7895	14488								region	CAN	COG-rs	6.3	23797
	region	MEE	SHO-rv	15.7895	14507.5								region	CAN	COG-rs	6.3	23827.1
	region	USA	EHO-rs	17.3648	14507.5								region	WEU	COG-rs	6.3	23827.1
	region	USA	EHO-rs	17.3648	14575.6								region	WEU	COG-rs	6.3	23846.6
	region	CAN	EHO-rs	17.3648	14575.6								region	EEU	COG-rs	6.3	23846.6
	region	CAN	EHO-rs	17.3648	14704								region	EEU	COG-rs	6.3	23849.1
	region	WEU	EHO-rs	17.3648	14704								region	NAF	COG-rs	6.3	23849.1
	region	WEU	EHO-rs	17.3648	14704.2								region	NAF	COG-rs	6.3	23873.9
	region	EEU	EHO-rs	17.3648	14704.2								region	EAF	COG-rs	6.3	23873.9
	region	EEU	EHO-rs	17.3648	14704.2								region	EAF	COG-rs	6.3	23875.5
	region	CHN	EHO-rs	17.3648	14704.2								region	SAF	COG-rs	6.3	23875.5
	region	CHN	EHO-rs	17.3648	14707.7								region	SAF	COG-rs	6.3	23876.7
	region	OEA	EHO-rs	17.3648	14707.7								region	CHN	COG-rs	6.3	23876.7
	region	OEA	EHO-rs	17.3648	14708.6								region	CHN	COG-rs	6.3	23896
	region	IND	EHO-rs	17.3648	14708.6								region	OEA	COG-rs	6.3	23896
	region	IND	EHO-rs	17.3648	14709								region	OEA	COG-rs	6.3	23899.2
	region	LAC	EHO-rs	17.3648	14709								region	IND	COG-rs	6.3	23899.2
	region	LAC	EHO-rs	17.3648	14709.1								region	IND	COG-rs	6.3	23901.3
	region	USA	TAO-rs	17.3648	14709.1								region	OSA	COG-rs	6.3	23901.3
	region	USA	TAO-rs	17.3648	14712.8								region	OSA	COG-rs	6.3	23904.3
	region	CAN	TAO-rs	17.3648	14712.8								region	PAS	COG-rs	6.3	23904.3
	region	CAN	TAO-rs	17.3648	15226.5								region	PAS	COG-rs	6.3	23911.2
	region	WEU	TAO-rs	17.3648	15226.5								region	LAC	COG-rs	6.3	23911.2
	region	WEU	TAO-rs	17.3648	15226.5								region	LAC	COG-rs	6.3	23933.5
	region	EEU	TAO-rs	17.3648	15226.5								region	USA	CMG-rv	6.3802	23933.5
	region	EEU	TAO-rs	17.3648	15226.5								region	USA	CMG-rv	6.3802	24119.7
	region	EAF	TAO-rs	17.3648	15226.5								region	CAN	CMG-rv	6.3802	24119.7
	region	EAF	TAO-rs	17.3648	15226.6								region	CAN	CMG-rv	6.3802	24171.9
	region	WCA	TAO-rs	17.3648	15226.6								region	WEU	CMG-rv	6.3802	24171.9
	region	WCA	TAO-rs	17.3648	15226.9								region	WEU	CMG-rv	6.3802	24224.1
	region	SAF	TAO-rs	17.3648	15226.9								region	EEU	CMG-rv	6.3802	24224.1
	region	SAF	TAO-rs	17.3648	15227.1								region	EEU	CMG-rv	6.3802	24239.1
	region	CHN	TAO-rs	17.3648	15227.1								region	FSU	CMG-rv	6.3802	24239.1
	region	CHN	TAO-rs	17.3648	15227.1								region	FSU	CMG-rv	6.3802	24388.1
	region	PAS	TAO-rs	17.3648	15227.1								region	NAF	CMG-rv	6.3802	24388.1
	region	PAS	TAO-rs	17.3648	15227.4								region	NAF	CMG-rv	6.3802	24417.9
	region	LAC	TAO-rs	17.3648	15227.4								region	EAF	CMG-rv	6.3802	24417.9
	region	LAC	TAO-rs	17.3648	15502.4								region	EAF	CMG-rv	6.3802	24432.9
	region	USA	SHO-rs	17.3648	15502.4								region	WCA	CMG-rv	6.3802	24432.9
	region	USA	SHO-rs	17.3648	15691.8								region	WCA	CMG-rv	6.3802	24447.9
	region	CAN	SHO-rs	17.3648	15691.8								region	SAF	CMG-rv	6.3802	24447.9
	region	CAN	SHO-rs	17.3648	15696.4								region	SAF	CMG-rv	6.3802	24462.9
	region	WEU	SHO-rs	17.3648	15696.4								region	MEE	CMG-rv	6.3802	24462.9
	region	WEU	SHO-rs	17.3648	15702.1								region	MEE	CMG-rv	6.3802	24477.9
	region	EEU	SHO-rs	17.3648	15702.1								region	CHN	CMG-rv	6.3802	24477.9
	region	EEU	SHO-rs	17.3648	15702.1								region	CHN	CMG-rv	6.3802	24589.7
	region	EAF	SHO-rs	17.3648	15702.1								region	IND	CMG-rv	6.3802	24589.7
	region	EAF	SHO-rs	17.3648	15702.1								region	IND	CMG-rv	6.3802	24641.9
	region	WCA	SHO-rs	17.3648	15702.1								region	OSA	CMG-rv	6.3802	24641.9
	region	WCA	SHO-rs	17.3648	15714.1								region	OSA	CMG-rv	6.3802	24649.3
	region	SAF	SHO-rs	17.3648	15714.1								region	JPN	CMG-rv	6.3802	24649.3
	region	SAF	SHO-rs	17.3648	15714.1								region	JPN	CMG-rv	6.3802	24656.7
	region	CHN	SHO-rs	17.3648	15714.1								region	OCN	CMG-rv	6.3802	24656.7
	region	CHN	SHO-rs	17.3648	15715.6								region	OCN	CMG-rv	6.3802	24693.9
	region	OEA	SHO-rs	17.3648	15715.6								region	PAS	CMG-rv	6.3802	24693.9
	region	OEA	SHO-rs	17.3648	15715.6								region	PAS	CMG-rv	6.3802	24701.3
	region	OCN	SHO-rs	17.3648	15715.6								region	LAC	CMG-rv	6.3802	24701.3
	region	OCN	SHO-rs	17.3648	15718.4								region	LAC	CMG-rv	6.3802	24746.1
	region	PAS	SHO-rs	17.3648	15718.4								region	USA	TIG-rv	6.3802	24746.1
	region	PAS	SHO-rs	17.3648	15719.7								region	USA	TIG-rv	6.3802	24969.7
	region	LAC	SHO-rs	17.3648	15719.7								region	CAN	TIG-rv	6.3802	24969.7
	region	LAC	SHO-rs	17.3648	15734.5								region	CAN	TIG-rv	6.3802	25081.5
	region	NAF	COO-rs	17.42	15734.5								region	WEU	TIG-rv	6.3802	25081.5
	region	NAF	COO-rs	17.42	15740.5								region	WEU	TIG-rv	6.3802	25111.3
	region	FSU	EHO-rv	18.4211	15740.5								region	EEU	TIG-rv	6.3802	25111.3
	region	FSU	EHO-rv	18.4211	15740.6								region	EEU	TIG-rv	6.3802	25141.1
	region	NAF	EHO-rv	18.4211	15740.6								region	FSU	TIG-rv	6.3802	25141.1
	region	NAF	EHO-rv	18.4211	15740.6								region	FSU	TIG-rv	6.3802	25349.7
	region	MEE	EHO-rv	18.4211	15740.6								region	NAF	TIG-rv	6.3802	25349.7
	region	MEE	EHO-rv	18.4211	15740.6								region	NAF	TIG-rv	6.3802	25409.3
	region	FSU	TAO-rv	18.4211	15740.6								region	EAF	TIG-rv	6.3802	25409.3
	region	FSU	TAO-rv	18.4211	15845.9								region	EAF	TIG-rv	6.3802	25439.1
	region	FSU	SHO-rv	18.4211	15845.9								region	WCA	TIG-rv	6.3802	25439.1
	region	FSU	SHO-rv	18.4211	15847.3								region	WCA	TIG-rv	6.3802	25528.5
	region	NAF	SHO-rv	18.4211	15847.3								region	SAF	TIG-rv	6.3802	25528.5
	region	NAF	SHO-rv	18.4211	15848.2								region	SAF	TIG-rv	6.3802	25550.9
	region	MEE	SHO-rv	18.4211	15848.2								region	MEE	TIG-rv	6.3802	25550.9
	region	MEE	SHO-rv	18.4211	15853.4								region	MEE	TIG-rv	6.3802	25662.7
	region	USA	EHO-rs	19.1016	15853.4								region	CHN	TIG-rv	6.3802	25662.7
	region	USA	EHO-rs	19.1016	15944.3								region	CHN	TIG-rv	6.3802	25685.1
	region	CAN	EHO-rs	19.1016	15944.3								region	OEA	TIG-rv	6.3802	25685.1
	region	CAN	EHO-rs	19.1016	15995.6								region	OEA	TIG-rv	6.3802	25707.5
	region	WEU	EHO-rs	19.1016	15995.6								region	IND	TIG-rv	6.3802	25707.5
	region	WEU	EHO-rs	19.1016	15996								region	IND	TIG-rv	6.3802	25729.9
	region	EEU	EHO-rs	19.1016	15996								region	OSA	TIG-rv	6.3802	25729.9
	region	EEU	EHO-rs	19.1016	15996								region	OSA	TIG-rv	6.3802	25774.7
	region	CHN	EHO-rs	19.1016	15996								region	OCN	TIG-rv	6.3802	25774.7
	region	CHN	EHO-rs	19.1016	16000.1								region	OCN	TIG-rv	6.3802	25804.5
	region	OEA	EHO-rs	19.1016	16000.1								region	PAS	TIG-rv	6.3802	25804.5
	region	OEA	EHO-rs	19.1016	16001								region	PAS	TIG-rv	6.3802	25849.3
	region	IND	EHO-rs	19.1016	16001								region	LAC	TIG-rv	6.3802	25849.3
	region	IND	EHO-rs	19.1016	16001.3								region	LAC	TIG-rv	6.3802	25894.1
	region	LAC	EHO-rs	19.1016	16001.3								region	USA	SHG-rv	6.6738	25894.1
	region	LAC	EHO-rs	19.1016	16001.3								region	USA	SHG-rv	6.6738	26212.6
	region	USA	TAO-rs	19.1016	16001.3								region	CAN	SHG-rv	6.6738	26212.6
	region	USA	TAO-rs	19.1016	16006.3								region	CAN	SHG-rv	6.6738	26244.4
	region	CAN	TAO-rs	19.1016	16006.3								region	WEU	SHG-rv	6.6738	26244.4
	region	CAN	TAO-rs	19.1016	16211.7								region	WEU	SHG-rv	6.6738	26282.7
	region	WEU	TAO-rs	19.1016	16211.7								region	EEU	SHG-rv	6.6738	26282.7
	region	WEU	TAO-rs	19.1016	16211.8								region	EEU	SHG-rv	6.6738	26321
	region	EEU	TAO-rs	19.1016	16211.8								region	FSU	SHG-rv	6.6738	26321
	region	EEU	TAO-rs	19.1016	16211.8								region	FSU	SHG-rv	6.6738	26703.2
	region	EAF	TAO-rs	19.1016	16211.8								region	NAF	SHG-rv	6.6738	26703.2
	region	EAF	TAO-rs	19.1016	16211.9								region	NAF	SHG-rv	6.6738	26728.7
	region	WCA	TAO-rs	19.1016	16211.9								region	EAF	SHG-rv	6.6738	26728.7
	region	WCA	TAO-rs	19.1016	16212.1								region	EAF	SHG-rv	6.6738	26741.5
	region	SAF	TAO-rs	19.1016	16212.1								region	WCA	SHG-rv	6.6738	26741.5
	region	SAF	TAO-rs	19.1016	16212.3								region	WCA	SHG-rv	6.6738	26792.5
	region	CHN	TAO-rs	19.1016	16212.3								region	SAF	SHG-rv	6.6738	26792.5
	region	CHN	TAO-rs	19.1016	16212.4								region	SAF	SHG-rv	6.6738	26805.3
	region	PAS	TAO-rs	19.1016	16212.4								region	MEE	SHG-rv	6.6738	26805.3
	region	PAS	TAO-rs	19.1016	16212.5								region	MEE	SHG-rv	6.6738	26830.8
	region	LAC	TAO-rs	19.1016	16212.5								region	CHN	SHG-rv	6.6738	26830.8
	region	LAC	TAO-rs	19.1016	16350.1								region	CHN	SHG-rv	6.6738	26843.6
	region	USA	SHO-rs	19.1016	16350.1								region	OEA	SHG-rv	6.6738	26843.6
	region	USA	SHO-rs	19.1016	16602.6								region	OEA	SHG-rv	6.6738	26856.4
	region	CAN	SHO-rs	19.1016	16602.6								region	IND	SHG-rv	6.6738	26856.4
	region	CAN	SHO-rs	19.1016	16604.4								region	IND	SHG-rv	6.6738	26869.3
	region	WEU	SHO-rs	19.1016	16604.4								region	OSA	SHG-rv	6.6738	26869.3
	region	WEU	SHO-rs	19.1016	16612.9								region	OSA	SHG-rv	6.6738	26907.6
	region	EEU	SHO-rs	19.1016	16612.9								region	OCN	SHG-rv	6.6738	26907.6
	region	EEU	SHO-rs	19.1016	16613								region	OCN	SHG-rv	6.6738	26933.1
	region	EAF	SHO-rs	19.1016	16613								region	PAS	SHG-rv	6.6738	26933.1
	region	EAF	SHO-rs	19.1016	16613								region	PAS	SHG-rv	6.6738	26945.9
	region	WCA	SHO-rs	19.1016	16613								region	LAC	SHG-rv	6.6738	26945.9
	region	WCA	SHO-rs	19.1016	16625								region	LAC	SHG-rv	6.6738	26971.4
	region	SAF	SHO-rs	19.1016	16625								region	USA	DEG-rv	6.81	26971.4
	region	SAF	SHO-rs	19.1016	16625								region	USA	DEG-rv	6.81	27083.1
	region	CHN	SHO-rs	19.1016	16625								region	CAN	DEG-rv	6.81	27083.1
	region	CHN	SHO-rs	19.1016	16626.6								region	CAN	DEG-rv	6.81	27111
	region	OEA	SHO-rs	19.1016	16626.6								region	WEU	DEG-rv	6.81	27111
	region	OEA	SHO-rs	19.1016	16626.7								region	WEU	DEG-rv	6.81	27127.8
	region	OCN	SHO-rs	19.1016	16626.7								region	EEU	DEG-rv	6.81	27127.8
	region	OCN	SHO-rs	19.1016	16629.5								region	EEU	DEG-rv	6.81	27144.6
	region	PAS	SHO-rs	19.1016	16629.5								region	FSU	DEG-rv	6.81	27144.6
	region	PAS	SHO-rs	19.1016	16630.3								region	FSU	DEG-rv	6.81	27312.3
	region	LAC	SHO-rs	19.1016	16630.3								region	NAF	DEG-rv	6.81	27312.3
	region	LAC	SHO-rs	19.1016	16637.7								region	NAF	DEG-rv	6.81	27368.3
	region	NAF	COO-rs	19.13	16637.7								region	EAF	DEG-rv	6.81	27368.3
	region	NAF	COO-rs	19.13	16643.7								region	EAF	DEG-rv	6.81	27385.1
	region	FSU	EHO-rv	21.0526	16643.7								region	WCA	DEG-rv	6.81	27385.1
	region	FSU	EHO-rv	21.0526	16643.8								region	WCA	DEG-rv	6.81	27424.2
	region	NAF	EHO-rv	21.0526	16643.8								region	SAF	DEG-rv	6.81	27424.2
	region	NAF	EHO-rv	21.0526	16643.9								region	SAF	DEG-rv	6.81	27435.5
	region	MEE	EHO-rv	21.0526	16643.9								region	MEE	DEG-rv	6.81	27435.5
	region	MEE	EHO-rv	21.0526	16643.9								region	MEE	DEG-rv	6.81	27474.6
	region	FSU	TAO-rv	21.0526	16643.9								region	CHN	DEG-rv	6.81	27474.6
	region	FSU	TAO-rv	21.0526	16801.8								region	CHN	DEG-rv	6.81	27485.9
	region	FSU	SHO-rv	21.0526	16801.8								region	IND	DEG-rv	6.81	27485.9
	region	FSU	SHO-rv	21.0526	16804								region	IND	DEG-rv	6.81	27497.1
	region	NAF	SHO-rv	21.0526	16804								region	OSA	DEG-rv	6.81	27497.1
	region	NAF	SHO-rv	21.0526	16805.1								region	OSA	DEG-rv	6.81	27525
	region	MEE	SHO-rv	21.0526	16805.1								region	OCN	DEG-rv	6.81	27525
	region	MEE	SHO-rv	21.0526	16806.4								region	OCN	DEG-rv	6.81	27536.3
	region	USA	EHO-rs	21.7069	16806.4								region	PAS	DEG-rv	6.81	27536.3
	region	USA	EHO-rs	21.7069	16897.3								region	PAS	DEG-rv	6.81	27547.5
	region	CAN	EHO-rs	21.7069	16897.3								region	LAC	DEG-rv	6.81	27547.5
	region	CAN	EHO-rs	21.7069	16948.6								region	LAC	DEG-rv	6.81	27581.1
	region	WEU	EHO-rs	21.7069	16948.6								region	USA	COG-rs	6.9174	27581.1
	region	WEU	EHO-rs	21.7069	16949								region	USA	COG-rs	6.9174	27605.6
	region	EEU	EHO-rs	21.7069	16949								region	CAN	COG-rs	6.9174	27605.6
	region	EEU	EHO-rs	21.7069	16949								region	CAN	COG-rs	6.9174	27635.7
	region	CHN	EHO-rs	21.7069	16949								region	WEU	COG-rs	6.9174	27635.7
	region	CHN	EHO-rs	21.7069	16953.1								region	WEU	COG-rs	6.9174	27655.2
	region	OEA	EHO-rs	21.7069	16953.1								region	EEU	COG-rs	6.9174	27655.2
	region	OEA	EHO-rs	21.7069	16954.3								region	EEU	COG-rs	6.9174	27657.7
	region	IND	EHO-rs	21.7069	16954.3								region	NAF	COG-rs	6.9174	27657.7
	region	IND	EHO-rs	21.7069	16954.7								region	NAF	COG-rs	6.9174	27682.5
	region	LAC	EHO-rs	21.7069	16954.7								region	EAF	COG-rs	6.9174	27682.5
	region	LAC	EHO-rs	21.7069	16954.7								region	EAF	COG-rs	6.9174	27684.2
	region	USA	TAO-rs	21.7069	16954.7								region	SAF	COG-rs	6.9174	27684.2
	region	USA	TAO-rs	21.7069	16959.7								region	SAF	COG-rs	6.9174	27685.3
	region	CAN	TAO-rs	21.7069	16959.7								region	CHN	COG-rs	6.9174	27685.3
	region	CAN	TAO-rs	21.7069	17165.1								region	CHN	COG-rs	6.9174	27704.6
	region	WEU	TAO-rs	21.7069	17165.1								region	OEA	COG-rs	6.9174	27704.6
	region	WEU	TAO-rs	21.7069	17165.2								region	OEA	COG-rs	6.9174	27707.8
	region	EEU	TAO-rs	21.7069	17165.2								region	IND	COG-rs	6.9174	27707.8
	region	EEU	TAO-rs	21.7069	17165.2								region	IND	COG-rs	6.9174	27710
	region	EAF	TAO-rs	21.7069	17165.2								region	OSA	COG-rs	6.9174	27710
	region	EAF	TAO-rs	21.7069	17165.3								region	OSA	COG-rs	6.9174	27712.9
	region	WCA	TAO-rs	21.7069	17165.3								region	PAS	COG-rs	6.9174	27712.9
	region	WCA	TAO-rs	21.7069	17165.6								region	PAS	COG-rs	6.9174	27719.8
	region	SAF	TAO-rs	21.7069	17165.6								region	LAC	COG-rs	6.9174	27719.8
	region	SAF	TAO-rs	21.7069	17165.8								region	LAC	COG-rs	6.9174	27742.1
	region	CHN	TAO-rs	21.7069	17165.8								region	USA	COG-rs	7.5348	27742.1
	region	CHN	TAO-rs	21.7069	17165.8								region	USA	COG-rs	7.5348	27766.6
	region	PAS	TAO-rs	21.7069	17165.8								region	CAN	COG-rs	7.5348	27766.6
	region	PAS	TAO-rs	21.7069	17166								region	CAN	COG-rs	7.5348	27796.6
	region	LAC	TAO-rs	21.7069	17166								region	WEU	COG-rs	7.5348	27796.6
	region	LAC	TAO-rs	21.7069	17303.6								region	WEU	COG-rs	7.5348	27816.2
	region	USA	SHO-rs	21.7069	17303.6								region	EEU	COG-rs	7.5348	27816.2
	region	USA	SHO-rs	21.7069	17556.1								region	EEU	COG-rs	7.5348	27818.7
	region	CAN	SHO-rs	21.7069	17556.1								region	NAF	COG-rs	7.5348	27818.7
	region	CAN	SHO-rs	21.7069	17557.9								region	NAF	COG-rs	7.5348	27843.5
	region	WEU	SHO-rs	21.7069	17557.9								region	EAF	COG-rs	7.5348	27843.5
	region	WEU	SHO-rs	21.7069	17566.4								region	EAF	COG-rs	7.5348	27845.1
	region	EEU	SHO-rs	21.7069	17566.4								region	SAF	COG-rs	7.5348	27845.1
	region	EEU	SHO-rs	21.7069	17566.5								region	SAF	COG-rs	7.5348	27846.2
	region	EAF	SHO-rs	21.7069	17566.5								region	CHN	COG-rs	7.5348	27846.2
	region	EAF	SHO-rs	21.7069	17566.5								region	CHN	COG-rs	7.5348	27865.6
	region	WCA	SHO-rs	21.7069	17566.5								region	OEA	COG-rs	7.5348	27865.6
	region	WCA	SHO-rs	21.7069	17578.4								region	OEA	COG-rs	7.5348	27868.8
	region	SAF	SHO-rs	21.7069	17578.4								region	IND	COG-rs	7.5348	27868.8
	region	SAF	SHO-rs	21.7069	17578.5								region	IND	COG-rs	7.5348	27870.9
	region	CHN	SHO-rs	21.7069	17578.5								region	OSA	COG-rs	7.5348	27870.9
	region	CHN	SHO-rs	21.7069	17580.1								region	OSA	COG-rs	7.5348	27873.9
	region	OEA	SHO-rs	21.7069	17580.1								region	PAS	COG-rs	7.5348	27873.9
	region	OEA	SHO-rs	21.7069	17580.2								region	PAS	COG-rs	7.5348	27880.8
	region	OCN	SHO-rs	21.7069	17580.2								region	LAC	COG-rs	7.5348	27880.8
	region	OCN	SHO-rs	21.7069	17584								region	LAC	COG-rs	7.5348	27903.1
	region	PAS	SHO-rs	21.7069	17584								region	USA	COG-rs	8.1522	27903.1
	region	PAS	SHO-rs	21.7069	17585								region	USA	COG-rs	8.1522	27927.6
	region	LAC	SHO-rs	21.7069	17585								region	CAN	COG-rs	8.1522	27927.6
	region	LAC	SHO-rs	21.7069	17592.4								region	CAN	COG-rs	8.1522	27957.6
	region	FSU	EHO-rs	23.6842	17592.4								region	WEU	COG-rs	8.1522	27957.6
	region	FSU	EHO-rs	23.6842	17592.6								region	WEU	COG-rs	8.1522	27977.2
	region	MEE	EHO-rs	23.6842	17592.6								region	EEU	COG-rs	8.1522	27977.2
	region	MEE	EHO-rs	23.6842	17680.6								region	EEU	COG-rs	8.1522	27979.6
	region	FSU	TAO-rs	23.6842	17680.6								region	NAF	COG-rs	8.1522	27979.6
	region	FSU	TAO-rs	23.6842	17801.7								region	NAF	COG-rs	8.1522	28004.4
	region	FSU	SHO-rs	23.6842	17801.7								region	EAF	COG-rs	8.1522	28004.4
	region	FSU	SHO-rs	23.6842	17832.9								region	EAF	COG-rs	8.1522	28006.1
	region	MEE	SHO-rs	23.6842	17832.9								region	SAF	COG-rs	8.1522	28006.1
	region	MEE	SHO-rs	23.6842	17838.8								region	SAF	COG-rs	8.1522	28007.2
	region	USA	EHO-rs	25.6148	17838.8								region	CHN	COG-rs	8.1522	28007.2
	region	USA	EHO-rs	25.6148	18043.3								region	CHN	COG-rs	8.1522	28026.6
	region	CAN	EHO-rs	25.6148	18043.3								region	OEA	COG-rs	8.1522	28026.6
	region	CAN	EHO-rs	25.6148	18068.9								region	OEA	COG-rs	8.1522	28029.7
	region	WEU	EHO-rs	25.6148	18068.9								region	IND	COG-rs	8.1522	28029.7
	region	WEU	EHO-rs	25.6148	18070.4								region	IND	COG-rs	8.1522	28031.9
	region	EEU	EHO-rs	25.6148	18070.4								region	OSA	COG-rs	8.1522	28031.9
	region	EEU	EHO-rs	25.6148	18070.4								region	OSA	COG-rs	8.1522	28034.9
	region	CHN	EHO-rs	25.6148	18070.4								region	PAS	COG-rs	8.1522	28034.9
	region	CHN	EHO-rs	25.6148	18082.1								region	PAS	COG-rs	8.1522	28041.7
	region	OEA	EHO-rs	25.6148	18082.1								region	LAC	COG-rs	8.1522	28041.7
	region	OEA	EHO-rs	25.6148	18085.1								region	LAC	COG-rs	8.1522	28064
	region	IND	EHO-rs	25.6148	18085.1								region	USA	SHG-rv	8.15556	28064
	region	IND	EHO-rs	25.6148	18085.9								region	USA	SHG-rv	8.15556	28329.5
	region	LAC	EHO-rs	25.6148	18085.9								region	CAN	SHG-rv	8.15556	28329.5
	region	LAC	EHO-rs	25.6148	18086.1								region	CAN	SHG-rv	8.15556	28356
	region	USA	TAO-rs	25.6148	18086.1								region	WEU	SHG-rv	8.15556	28356
	region	USA	TAO-rs	25.6148	18097.2								region	WEU	SHG-rv	8.15556	28387.9
	region	CAN	TAO-rs	25.6148	18097.2								region	EEU	SHG-rv	8.15556	28387.9
	region	CAN	TAO-rs	25.6148	18199.9								region	EEU	SHG-rv	8.15556	28419.8
	region	WEU	TAO-rs	25.6148	18199.9								region	FSU	SHG-rv	8.15556	28419.8
	region	WEU	TAO-rs	25.6148	18200.2								region	FSU	SHG-rv	8.15556	28738.3
	region	EEU	TAO-rs	25.6148	18200.2								region	NAF	SHG-rv	8.15556	28738.3
	region	EEU	TAO-rs	25.6148	18200.3								region	NAF	SHG-rv	8.15556	28759.6
	region	EAF	TAO-rs	25.6148	18200.3								region	EAF	SHG-rv	8.15556	28759.6
	region	EAF	TAO-rs	25.6148	18200.5								region	EAF	SHG-rv	8.15556	28770.3
	region	WCA	TAO-rs	25.6148	18200.5								region	WCA	SHG-rv	8.15556	28770.3
	region	WCA	TAO-rs	25.6148	18201								region	WCA	SHG-rv	8.15556	28812.7
	region	SAF	TAO-rs	25.6148	18201								region	SAF	SHG-rv	8.15556	28812.7
	region	SAF	TAO-rs	25.6148	18201.4								region	SAF	SHG-rv	8.15556	28823.4
	region	CHN	TAO-rs	25.6148	18201.4								region	MEE	SHG-rv	8.15556	28823.4
	region	CHN	TAO-rs	25.6148	18201.6								region	MEE	SHG-rv	8.15556	28844.6
	region	PAS	TAO-rs	25.6148	18201.6								region	CHN	SHG-rv	8.15556	28844.6
	region	PAS	TAO-rs	25.6148	18202								region	CHN	SHG-rv	8.15556	28855.3
	region	LAC	TAO-rs	25.6148	18202								region	OEA	SHG-rv	8.15556	28855.3
	region	LAC	TAO-rs	25.6148	18568.7								region	OEA	SHG-rv	8.15556	28866
	region	USA	SHO-rs	25.6148	18568.7								region	IND	SHG-rv	8.15556	28866
	region	USA	SHO-rs	25.6148	19136.9								region	IND	SHG-rv	8.15556	28876.7
	region	CAN	SHO-rs	25.6148	19136.9								region	OSA	SHG-rv	8.15556	28876.7
	region	CAN	SHO-rs	25.6148	19137.8								region	OSA	SHG-rv	8.15556	28908.6
	region	WEU	SHO-rs	25.6148	19137.8								region	OCN	SHG-rv	8.15556	28908.6
	region	WEU	SHO-rs	25.6148	19171.8								region	OCN	SHG-rv	8.15556	28929.9
	region	EEU	SHO-rs	25.6148	19171.8								region	PAS	SHG-rv	8.15556	28929.9
	region	EEU	SHO-rs	25.6148	19172								region	PAS	SHG-rv	8.15556	28940.5
	region	EAF	SHO-rs	25.6148	19172								region	LAC	SHG-rv	8.15556	28940.5
	region	EAF	SHO-rs	25.6148	19172								region	LAC	SHG-rv	8.15556	28961.8
	region	WCA	SHO-rs	25.6148	19172								region	USA	DEG-rv	8.322	28961.8
	region	WCA	SHO-rs	25.6148	19196								region	USA	DEG-rv	8.322	29054.9
	region	SAF	SHO-rs	25.6148	19196								region	CAN	DEG-rv	8.322	29054.9
	region	SAF	SHO-rs	25.6148	19196								region	CAN	DEG-rv	8.322	29078.1
	region	CHN	SHO-rs	25.6148	19196								region	WEU	DEG-rv	8.322	29078.1
	region	CHN	SHO-rs	25.6148	19200.8								region	WEU	DEG-rv	8.322	29092.1
	region	OEA	SHO-rs	25.6148	19200.8								region	EEU	DEG-rv	8.322	29092.1
	region	OEA	SHO-rs	25.6148	19200.9								region	EEU	DEG-rv	8.322	29106.1
	region	OCN	SHO-rs	25.6148	19200.9								region	FSU	DEG-rv	8.322	29106.1
	region	OCN	SHO-rs	25.6148	19210.4								region	FSU	DEG-rv	8.322	29245.9
	region	PAS	SHO-rs	25.6148	19210.4								region	NAF	DEG-rv	8.322	29245.9
	region	PAS	SHO-rs	25.6148	19212.4								region	NAF	DEG-rv	8.322	29292.5
	region	LAC	SHO-rs	25.6148	19212.4								region	EAF	DEG-rv	8.322	29292.5
	region	LAC	SHO-rs	25.6148	19232.1								region	EAF	DEG-rv	8.322	29306.5
	region	FSU	EHO-rs	26.3158	19232.1								region	WCA	DEG-rv	8.322	29306.5
	region	FSU	EHO-rs	26.3158	19232.3								region	WCA	DEG-rv	8.322	29339.1
	region	NAF	EHO-rs	26.3158	19232.3								region	SAF	DEG-rv	8.322	29339.1
	region	NAF	EHO-rs	26.3158	19232.4								region	SAF	DEG-rv	8.322	29348.5
	region	MEE	EHO-rs	26.3158	19232.4								region	MEE	DEG-rv	8.322	29348.5
	region	MEE	EHO-rs	26.3158	19291.1								region	MEE	DEG-rv	8.322	29381.1
	region	FSU	TAO-rs	26.3158	19291.1								region	CHN	DEG-rv	8.322	29381.1
	region	FSU	TAO-rs	26.3158	19412.2								region	CHN	DEG-rv	8.322	29390.5
	region	FSU	SHO-rs	26.3158	19412.2								region	IND	DEG-rv	8.322	29390.5
	region	FSU	SHO-rs	26.3158	19443.5								region	IND	DEG-rv	8.322	29399.9
	region	NAF	SHO-rs	26.3158	19443.5								region	OSA	DEG-rv	8.322	29399.9
	region	NAF	SHO-rs	26.3158	19446.5								region	OSA	DEG-rv	8.322	29423.1
	region	MEE	SHO-rs	26.3158	19446.5								region	OCN	DEG-rv	8.322	29423.1
	region	MEE	SHO-rs	26.3158	19450.4								region	OCN	DEG-rv	8.322	29432.5
	region	FSU	EHO-rs	30.2632	19450.4								region	PAS	DEG-rv	8.322	29432.5
	region	FSU	EHO-rs	30.2632	19450.5								region	PAS	DEG-rv	8.322	29441.9
	region	NAF	EHO-rs	30.2632	19450.5								region	LAC	DEG-rv	8.322	29441.9
	region	NAF	EHO-rs	30.2632	19450.8								region	LAC	DEG-rv	8.322	29469.9
	region	MEE	EHO-rs	30.2632	19450.8								region	USA	CMG-rs	11.8258	29469.9
	region	MEE	EHO-rs	30.2632	19509.5								region	USA	CMG-rs	11.8258	29488.8
	region	FSU	TAO-rs	30.2632	19509.5								region	CAN	CMG-rs	11.8258	29488.8
	region	FSU	TAO-rs	30.2632	19630.6								region	CAN	CMG-rs	11.8258	29495.1
	region	FSU	SHO-rs	30.2632	19630.6								region	WEU	CMG-rs	11.8258	29495.1
	region	FSU	SHO-rs	30.2632	19661.8								region	WEU	CMG-rs	11.8258	29501.3
	region	NAF	SHO-rs	30.2632	19661.8								region	EEU	CMG-rs	11.8258	29501.3
	region	NAF	SHO-rs	30.2632	19667.8								region	EEU	CMG-rs	11.8258	29503.4
	region	MEE	SHO-rs	30.2632	19667.8								region	FSU	CMG-rs	11.8258	29503.4
	region	MEE	SHO-rs	30.2632	19671.7								region	FSU	CMG-rs	11.8258	29524.4
	region	USA	EHO-rs	30.8253	19671.7								region	NAF	CMG-rs	11.8258	29524.4
	region	USA	EHO-rs	30.8253	19774								region	NAF	CMG-rs	11.8258	29528.6
	region	CAN	EHO-rs	30.8253	19774								region	EAF	CMG-rs	11.8258	29528.6
	region	CAN	EHO-rs	30.8253	19966.5								region	EAF	CMG-rs	11.8258	29530.7
	region	WEU	EHO-rs	30.8253	19966.5								region	WCA	CMG-rs	11.8258	29530.7
	region	WEU	EHO-rs	30.8253	19966.8								region	WCA	CMG-rs	11.8258	29532.8
	region	EEU	EHO-rs	30.8253	19966.8								region	SAF	CMG-rs	11.8258	29532.8
	region	EEU	EHO-rs	30.8253	19966.8								region	SAF	CMG-rs	11.8258	29534.9
	region	CHN	EHO-rs	30.8253	19966.8								region	MEE	CMG-rs	11.8258	29534.9
	region	CHN	EHO-rs	30.8253	19972.1								region	MEE	CMG-rs	11.8258	29537
	region	OEA	EHO-rs	30.8253	19972.1								region	CHN	CMG-rs	11.8258	29537
	region	OEA	EHO-rs	30.8253	19973.4								region	CHN	CMG-rs	11.8258	29553.7
	region	IND	EHO-rs	30.8253	19973.4								region	OEA	CMG-rs	11.8258	29553.7
	region	IND	EHO-rs	30.8253	19974								region	OEA	CMG-rs	11.8258	29554.1
	region	LAC	EHO-rs	30.8253	19974								region	IND	CMG-rs	11.8258	29554.1
	region	LAC	EHO-rs	30.8253	19974.2								region	IND	CMG-rs	11.8258	29560.4
	region	USA	TAO-rs	30.8253	19974.2								region	OSA	CMG-rs	11.8258	29560.4
	region	USA	TAO-rs	30.8253	19979.7								region	OSA	CMG-rs	11.8258	29561.7
	region	CAN	TAO-rs	30.8253	19979.7								region	JPN	CMG-rs	11.8258	29561.7
	region	CAN	TAO-rs	30.8253	20750.2								region	JPN	CMG-rs	11.8258	29562.9
	region	WEU	TAO-rs	30.8253	20750.2								region	OCN	CMG-rs	11.8258	29562.9
	region	WEU	TAO-rs	30.8253	20750.3								region	OCN	CMG-rs	11.8258	29567.1
	region	EEU	TAO-rs	30.8253	20750.3								region	PAS	CMG-rs	11.8258	29567.1
	region	EEU	TAO-rs	30.8253	20750.3								region	PAS	CMG-rs	11.8258	29568.4
	region	EAF	TAO-rs	30.8253	20750.3								region	LAC	CMG-rs	11.8258	29568.4
	region	EAF	TAO-rs	30.8253	20750.4								region	LAC	CMG-rs	11.8258	29574.7
	region	WCA	TAO-rs	30.8253	20750.4								region	USA	TIG-rs	13.5152	29574.7
	region	WCA	TAO-rs	30.8253	20750.8								region	USA	TIG-rs	13.5152	29606.6
	region	SAF	TAO-rs	30.8253	20750.8								region	CAN	TIG-rs	13.5152	29606.6
	region	SAF	TAO-rs	30.8253	20751.1								region	CAN	TIG-rs	13.5152	29625
	region	CHN	TAO-rs	30.8253	20751.1								region	WEU	TIG-rs	13.5152	29625
	region	CHN	TAO-rs	30.8253	20751.2								region	WEU	TIG-rs	13.5152	29629.2
	region	PAS	TAO-rs	30.8253	20751.2								region	EEU	TIG-rs	13.5152	29629.2
	region	PAS	TAO-rs	30.8253	20751.5								region	EEU	TIG-rs	13.5152	29633.4
	region	LAC	TAO-rs	30.8253	20751.5								region	FSU	TIG-rs	13.5152	29633.4
	region	LAC	TAO-rs	30.8253	21164.1								region	FSU	TIG-rs	13.5152	29662.7
	region	USA	SHO-rs	30.8253	21164.1								region	NAF	TIG-rs	13.5152	29662.7
	region	USA	SHO-rs	30.8253	21448.2								region	NAF	TIG-rs	13.5152	29671.1
	region	CAN	SHO-rs	30.8253	21448.2								region	EAF	TIG-rs	13.5152	29671.1
	region	CAN	SHO-rs	30.8253	21455.1								region	EAF	TIG-rs	13.5152	29675.3
	region	WEU	SHO-rs	30.8253	21455.1								region	WCA	TIG-rs	13.5152	29675.3
	region	WEU	SHO-rs	30.8253	21463.6								region	WCA	TIG-rs	13.5152	29687.9
	region	EEU	SHO-rs	30.8253	21463.6								region	SAF	TIG-rs	13.5152	29687.9
	region	EEU	SHO-rs	30.8253	21463.7								region	SAF	TIG-rs	13.5152	29692.1
	region	EAF	SHO-rs	30.8253	21463.7								region	MEE	TIG-rs	13.5152	29692.1
	region	EAF	SHO-rs	30.8253	21463.7								region	MEE	TIG-rs	13.5152	29708.8
	region	WCA	SHO-rs	30.8253	21463.7								region	CHN	TIG-rs	13.5152	29708.8
	region	WCA	SHO-rs	30.8253	21481.7								region	CHN	TIG-rs	13.5152	29713
	region	SAF	SHO-rs	30.8253	21481.7								region	OEA	TIG-rs	13.5152	29713
	region	SAF	SHO-rs	30.8253	21481.7								region	OEA	TIG-rs	13.5152	29717.2
	region	CHN	SHO-rs	30.8253	21481.7								region	IND	TIG-rs	13.5152	29717.2
	region	CHN	SHO-rs	30.8253	21483.8								region	IND	TIG-rs	13.5152	29721.4
	region	OEA	SHO-rs	30.8253	21483.8								region	OSA	TIG-rs	13.5152	29721.4
	region	OEA	SHO-rs	30.8253	21483.9								region	OSA	TIG-rs	13.5152	29729.8
	region	OCN	SHO-rs	30.8253	21483.9								region	OCN	TIG-rs	13.5152	29729.8
	region	OCN	SHO-rs	30.8253	21488.1								region	OCN	TIG-rs	13.5152	29733.9
	region	PAS	SHO-rs	30.8253	21488.1								region	PAS	TIG-rs	13.5152	29733.9
	region	PAS	SHO-rs	30.8253	21490								region	PAS	TIG-rs	13.5152	29742.3
	region	LAC	SHO-rs	30.8253	21490								region	LAC	TIG-rs	13.5152	29742.3
	region	LAC	SHO-rs	30.8253	21512.3								region	LAC	TIG-rs	13.5152	29754.9
	region	FSU	EHO-rs	36.1842	21512.3								region	USA	SHG-rs	13.9882	29754.9
	region	FSU	EHO-rs	36.1842	21512.6								region	USA	SHG-rs	13.9882	29773.4
	region	NAF	EHO-rs	36.1842	21512.6								region	CAN	SHG-rs	13.9882	29773.4
	region	NAF	EHO-rs	36.1842	21513.5								region	CAN	SHG-rs	13.9882	29778.4
	region	MEE	EHO-rs	36.1842	21513.5								region	WEU	SHG-rs	13.9882	29778.4
	region	MEE	EHO-rs	36.1842	21601.5								region	WEU	SHG-rs	13.9882	29782.5
	region	FSU	TAO-rs	36.1842	21601.5								region	EEU	SHG-rs	13.9882	29782.5
	region	FSU	TAO-rs	36.1842	21843.7								region	EEU	SHG-rs	13.9882	29783.4
	region	FSU	SHO-rs	36.1842	21843.7								region	FSU	SHG-rs	13.9882	29783.4
	region	FSU	SHO-rs	36.1842	21906.2								region	FSU	SHG-rs	13.9882	29807.7
	region	NAF	SHO-rs	36.1842	21906.2								region	NAF	SHG-rs	13.9882	29807.7
	region	NAF	SHO-rs	36.1842	21927.3								region	NAF	SHG-rs	13.9882	29817.4
	region	MEE	SHO-rs	36.1842	21927.3								region	EAF	SHG-rs	13.9882	29817.4
	region	MEE	SHO-rs	36.1842	21933.1								region	EAF	SHG-rs	13.9882	29818.3
	region	USA	EHO-rs	37.3385	21933.1								region	WCA	SHG-rs	13.9882	29818.3
	region	USA	EHO-rs	37.3385	22069.4								region	WCA	SHG-rs	13.9882	29821.6
	region	CAN	EHO-rs	37.3385	22069.4								region	SAF	SHG-rs	13.9882	29821.6
	region	CAN	EHO-rs	37.3385	22146.4								region	SAF	SHG-rs	13.9882	29831.4
	region	WEU	EHO-rs	37.3385	22146.4								region	MEE	SHG-rs	13.9882	29831.4
	region	WEU	EHO-rs	37.3385	22147								region	MEE	SHG-rs	13.9882	29833.1
	region	EEU	EHO-rs	37.3385	22147								region	CHN	SHG-rs	13.9882	29833.1
	region	EEU	EHO-rs	37.3385	22147								region	CHN	SHG-rs	13.9882	29861.7
	region	CHN	EHO-rs	37.3385	22147								region	OEA	SHG-rs	13.9882	29861.7
	region	CHN	EHO-rs	37.3385	22153.1								region	OEA	SHG-rs	13.9882	29862.5
	region	OEA	EHO-rs	37.3385	22153.1								region	IND	SHG-rs	13.9882	29862.5
	region	OEA	EHO-rs	37.3385	22154.4								region	IND	SHG-rs	13.9882	29863.4
	region	IND	EHO-rs	37.3385	22154.4								region	OSA	SHG-rs	13.9882	29863.4
	region	IND	EHO-rs	37.3385	22154.8								region	OSA	SHG-rs	13.9882	29865.9
	region	LAC	EHO-rs	37.3385	22154.8								region	OCN	SHG-rs	13.9882	29865.9
	region	LAC	EHO-rs	37.3385	22154.9								region	OCN	SHG-rs	13.9882	29871.9
	region	USA	TAO-rs	37.3385	22154.9								region	PAS	SHG-rs	13.9882	29871.9
	region	USA	TAO-rs	37.3385	22162.4								region	PAS	SHG-rs	13.9882	29872.8
	region	CAN	TAO-rs	37.3385	22162.4								region	LAC	SHG-rs	13.9882	29872.8
	region	CAN	TAO-rs	37.3385	22470.6								region	LAC	SHG-rs	13.9882	29914.7
	region	WEU	TAO-rs	37.3385	22470.6								region	USA	CMG-rs	14.2601	29914.7
	region	WEU	TAO-rs	37.3385	22470.7								region	USA	CMG-rs	14.2601	29933.5
	region	EEU	TAO-rs	37.3385	22470.7								region	CAN	CMG-rs	14.2601	29933.5
	region	EEU	TAO-rs	37.3385	22470.7								region	CAN	CMG-rs	14.2601	29939.8
	region	EAF	TAO-rs	37.3385	22470.7								region	WEU	CMG-rs	14.2601	29939.8
	region	EAF	TAO-rs	37.3385	22470.8								region	WEU	CMG-rs	14.2601	29946.1
	region	WCA	TAO-rs	37.3385	22470.8								region	EEU	CMG-rs	14.2601	29946.1
	region	WCA	TAO-rs	37.3385	22471.2								region	EEU	CMG-rs	14.2601	29948.2
	region	SAF	TAO-rs	37.3385	22471.2								region	FSU	CMG-rs	14.2601	29948.2
	region	SAF	TAO-rs	37.3385	22471.5								region	FSU	CMG-rs	14.2601	29969.2
	region	CHN	TAO-rs	37.3385	22471.5								region	NAF	CMG-rs	14.2601	29969.2
	region	CHN	TAO-rs	37.3385	22471.6								region	NAF	CMG-rs	14.2601	29973.4
	region	PAS	TAO-rs	37.3385	22471.6								region	EAF	CMG-rs	14.2601	29973.4
	region	PAS	TAO-rs	37.3385	22471.8								region	EAF	CMG-rs	14.2601	29975.4
	region	LAC	TAO-rs	37.3385	22471.8								region	WCA	CMG-rs	14.2601	29975.4
	region	LAC	TAO-rs	37.3385	22678.1								region	WCA	CMG-rs	14.2601	29977.5
	region	USA	SHO-rs	37.3385	22678.1								region	SAF	CMG-rs	14.2601	29977.5
	region	USA	SHO-rs	37.3385	23056.9								region	SAF	CMG-rs	14.2601	29979.6
	region	CAN	SHO-rs	37.3385	23056.9								region	MEE	CMG-rs	14.2601	29979.6
	region	CAN	SHO-rs	37.3385	23059.6								region	MEE	CMG-rs	14.2601	29981.7
	region	WEU	SHO-rs	37.3385	23059.6								region	CHN	CMG-rs	14.2601	29981.7
	region	WEU	SHO-rs	37.3385	23072.4								region	CHN	CMG-rs	14.2601	29998.5
	region	EEU	SHO-rs	37.3385	23072.4								region	OEA	CMG-rs	14.2601	29998.5
	region	EEU	SHO-rs	37.3385	23072.4								region	OEA	CMG-rs	14.2601	29998.9
	region	EAF	SHO-rs	37.3385	23072.4								region	IND	CMG-rs	14.2601	29998.9
	region	EAF	SHO-rs	37.3385	23072.4								region	IND	CMG-rs	14.2601	30005.2
	region	WCA	SHO-rs	37.3385	23072.4								region	OSA	CMG-rs	14.2601	30005.2
	region	WCA	SHO-rs	37.3385	23090.4								region	OSA	CMG-rs	14.2601	30006.5
	region	SAF	SHO-rs	37.3385	23090.4								region	JPN	CMG-rs	14.2601	30006.5
	region	SAF	SHO-rs	37.3385	23090.4								region	JPN	CMG-rs	14.2601	30007.7
	region	CHN	SHO-rs	37.3385	23090.4								region	OCN	CMG-rs	14.2601	30007.7
	region	CHN	SHO-rs	37.3385	23092.9								region	OCN	CMG-rs	14.2601	30011.9
	region	OEA	SHO-rs	37.3385	23092.9								region	PAS	CMG-rs	14.2601	30011.9
	region	OEA	SHO-rs	37.3385	23093								region	PAS	CMG-rs	14.2601	30013.2
	region	OCN	SHO-rs	37.3385	23093								region	LAC	CMG-rs	14.2601	30013.2
	region	OCN	SHO-rs	37.3385	23097.2								region	LAC	CMG-rs	14.2601	30019.5
	region	PAS	SHO-rs	37.3385	23097.2								region	USA	TIG-rs	16.2973	30019.5
	region	PAS	SHO-rs	37.3385	23098.4								region	USA	TIG-rs	16.2973	30051.3
	region	LAC	SHO-rs	37.3385	23098.4								region	CAN	TIG-rs	16.2973	30051.3
	region	LAC	SHO-rs	37.3385	23109.5								region	CAN	TIG-rs	16.2973	30069.8
	region	FSU	EHO-rs	44.0789	23109.5								region	WEU	TIG-rs	16.2973	30069.8
	region	FSU	EHO-rs	44.0789	23109.7								region	WEU	TIG-rs	16.2973	30074
	region	MEE	EHO-rs	44.0789	23109.7								region	EEU	TIG-rs	16.2973	30074
	region	MEE	EHO-rs	44.0789	23241.8								region	EEU	TIG-rs	16.2973	30078.1
	region	FSU	TAO-rs	44.0789	23241.8								region	FSU	TIG-rs	16.2973	30078.1
	region	FSU	TAO-rs	44.0789	23423.4								region	FSU	TIG-rs	16.2973	30107.5
	region	FSU	SHO-rs	44.0789	23423.4								region	NAF	TIG-rs	16.2973	30107.5
	region	FSU	SHO-rs	44.0789	23470.3								region	NAF	TIG-rs	16.2973	30115.9
	region	MEE	SHO-rs	44.0789	23470.3								region	EAF	TIG-rs	16.2973	30115.9
	region	MEE	SHO-rs	44.0789	23479								region	EAF	TIG-rs	16.2973	30120.1
	region	USA	EHO-rs	45.1542	23479								region	WCA	TIG-rs	16.2973	30120.1
	region	USA	EHO-rs	45.1542	23615.4								region	WCA	TIG-rs	16.2973	30132.6
	region	CAN	EHO-rs	45.1542	23615.4								region	SAF	TIG-rs	16.2973	30132.6
	region	CAN	EHO-rs	45.1542	23692.4								region	SAF	TIG-rs	16.2973	30136.8
	region	WEU	EHO-rs	45.1542	23692.4								region	MEE	TIG-rs	16.2973	30136.8
	region	WEU	EHO-rs	45.1542	23692.9								region	MEE	TIG-rs	16.2973	30153.6
	region	EEU	EHO-rs	45.1542	23692.9								region	CHN	TIG-rs	16.2973	30153.6
	region	EEU	EHO-rs	45.1542	23692.9								region	CHN	TIG-rs	16.2973	30157.8
	region	CHN	EHO-rs	45.1542	23692.9								region	OEA	TIG-rs	16.2973	30157.8
	region	CHN	EHO-rs	45.1542	23699.1								region	OEA	TIG-rs	16.2973	30162
	region	OEA	EHO-rs	45.1542	23699.1								region	IND	TIG-rs	16.2973	30162
	region	OEA	EHO-rs	45.1542	23700.8								region	IND	TIG-rs	16.2973	30166.1
	region	IND	EHO-rs	45.1542	23700.8								region	OSA	TIG-rs	16.2973	30166.1
	region	IND	EHO-rs	45.1542	23701.4								region	OSA	TIG-rs	16.2973	30174.5
	region	LAC	EHO-rs	45.1542	23701.4								region	OCN	TIG-rs	16.2973	30174.5
	region	LAC	EHO-rs	45.1542	23701.5								region	OCN	TIG-rs	16.2973	30178.7
	region	USA	TAO-rs	45.1542	23701.5								region	PAS	TIG-rs	16.2973	30178.7
	region	USA	TAO-rs	45.1542	23708.9								region	PAS	TIG-rs	16.2973	30187.1
	region	CAN	TAO-rs	45.1542	23708.9								region	LAC	TIG-rs	16.2973	30187.1
	region	CAN	TAO-rs	45.1542	24017.1								region	LAC	TIG-rs	16.2973	30199.7
	region	WEU	TAO-rs	45.1542	24017.1								region	USA	SHG-rs	16.8677	30199.7
	region	WEU	TAO-rs	45.1542	24017.2								region	USA	SHG-rs	16.8677	30218.1
	region	EEU	TAO-rs	45.1542	24017.2								region	CAN	SHG-rs	16.8677	30218.1
	region	EEU	TAO-rs	45.1542	24017.2								region	CAN	SHG-rs	16.8677	30223.1
	region	EAF	TAO-rs	45.1542	24017.2								region	WEU	SHG-rs	16.8677	30223.1
	region	EAF	TAO-rs	45.1542	24017.4								region	WEU	SHG-rs	16.8677	30227.3
	region	WCA	TAO-rs	45.1542	24017.4								region	EEU	SHG-rs	16.8677	30227.3
	region	WCA	TAO-rs	45.1542	24017.8								region	EEU	SHG-rs	16.8677	30228.2
	region	SAF	TAO-rs	45.1542	24017.8								region	FSU	SHG-rs	16.8677	30228.2
	region	SAF	TAO-rs	45.1542	24018.1								region	FSU	SHG-rs	16.8677	30252.5
	region	CHN	TAO-rs	45.1542	24018.1								region	NAF	SHG-rs	16.8677	30252.5
	region	CHN	TAO-rs	45.1542	24018.2								region	NAF	SHG-rs	16.8677	30262.2
	region	PAS	TAO-rs	45.1542	24018.2								region	EAF	SHG-rs	16.8677	30262.2
	region	PAS	TAO-rs	45.1542	24018.4								region	EAF	SHG-rs	16.8677	30263
	region	LAC	TAO-rs	45.1542	24018.4								region	WCA	SHG-rs	16.8677	30263
	region	LAC	TAO-rs	45.1542	24224.7								region	WCA	SHG-rs	16.8677	30266.4
	region	USA	SHO-rs	45.1542	24224.7								region	SAF	SHG-rs	16.8677	30266.4
	region	USA	SHO-rs	45.1542	24603.5								region	SAF	SHG-rs	16.8677	30276.2
	region	CAN	SHO-rs	45.1542	24603.5								region	MEE	SHG-rs	16.8677	30276.2
	region	CAN	SHO-rs	45.1542	24606.3								region	MEE	SHG-rs	16.8677	30277.9
	region	WEU	SHO-rs	45.1542	24606.3								region	CHN	SHG-rs	16.8677	30277.9
	region	WEU	SHO-rs	45.1542	24619								region	CHN	SHG-rs	16.8677	30306.5
	region	EEU	SHO-rs	45.1542	24619								region	OEA	SHG-rs	16.8677	30306.5
	region	EEU	SHO-rs	45.1542	24619.1								region	OEA	SHG-rs	16.8677	30307.3
	region	EAF	SHO-rs	45.1542	24619.1								region	IND	SHG-rs	16.8677	30307.3
	region	EAF	SHO-rs	45.1542	24619.1								region	IND	SHG-rs	16.8677	30308.1
	region	WCA	SHO-rs	45.1542	24619.1								region	OSA	SHG-rs	16.8677	30308.1
	region	WCA	SHO-rs	45.1542	24637.1								region	OSA	SHG-rs	16.8677	30310.7
	region	SAF	SHO-rs	45.1542	24637.1								region	OCN	SHG-rs	16.8677	30310.7
	region	SAF	SHO-rs	45.1542	24637.1								region	OCN	SHG-rs	16.8677	30316.7
	region	CHN	SHO-rs	45.1542	24637.1								region	PAS	SHG-rs	16.8677	30316.7
	region	CHN	SHO-rs	45.1542	24639.6								region	PAS	SHG-rs	16.8677	30317.5
	region	OEA	SHO-rs	45.1542	24639.6								region	LAC	SHG-rs	16.8677	30317.5
	region	OEA	SHO-rs	45.1542	24639.7								region	LAC	SHG-rs	16.8677	30359.4
	region	OCN	SHO-rs	45.1542	24639.7								region	USA	CMG-rs	16.9379	30359.4
	region	OCN	SHO-rs	45.1542	24645.4								region	USA	CMG-rs	16.9379	30376.2
	region	PAS	SHO-rs	45.1542	24645.4								region	CAN	CMG-rs	16.9379	30376.2
	region	PAS	SHO-rs	45.1542	24646.9								region	CAN	CMG-rs	16.9379	30381.8
	region	LAC	SHO-rs	45.1542	24646.9								region	WEU	CMG-rs	16.9379	30381.8
	region	LAC	SHO-rs	45.1542	24658								region	WEU	CMG-rs	16.9379	30387.4
	region	USA	EHO-rs	53.6214	24658								region	EEU	CMG-rs	16.9379	30387.4
	region	USA	EHO-rs	53.6214	24964.7								region	EEU	CMG-rs	16.9379	30389.2
	region	CAN	EHO-rs	53.6214	24964.7								region	FSU	CMG-rs	16.9379	30389.2
	region	CAN	EHO-rs	53.6214	25003.2								region	FSU	CMG-rs	16.9379	30407.9
	region	WEU	EHO-rs	53.6214	25003.2								region	NAF	CMG-rs	16.9379	30407.9
	region	WEU	EHO-rs	53.6214	25005.4								region	NAF	CMG-rs	16.9379	30411.6
	region	EEU	EHO-rs	53.6214	25005.4								region	EAF	CMG-rs	16.9379	30411.6
	region	EEU	EHO-rs	53.6214	25005.5								region	EAF	CMG-rs	16.9379	30413.5
	region	CHN	EHO-rs	53.6214	25005.5								region	WCA	CMG-rs	16.9379	30413.5
	region	CHN	EHO-rs	53.6214	25023								region	WCA	CMG-rs	16.9379	30415.3
	region	OEA	EHO-rs	53.6214	25023								region	SAF	CMG-rs	16.9379	30415.3
	region	OEA	EHO-rs	53.6214	25027.5								region	SAF	CMG-rs	16.9379	30417.2
	region	IND	EHO-rs	53.6214	25027.5								region	MEE	CMG-rs	16.9379	30417.2
	region	IND	EHO-rs	53.6214	25028.7								region	MEE	CMG-rs	16.9379	30419
	region	LAC	EHO-rs	53.6214	25028.7								region	CHN	CMG-rs	16.9379	30419
	region	LAC	EHO-rs	53.6214	25028.9								region	CHN	CMG-rs	16.9379	30433.9
	region	USA	TAO-rs	53.6214	25028.9								region	OEA	CMG-rs	16.9379	30433.9
	region	USA	TAO-rs	53.6214	25045.6								region	OEA	CMG-rs	16.9379	30434.3
	region	CAN	TAO-rs	53.6214	25045.6								region	IND	CMG-rs	16.9379	30434.3
	region	CAN	TAO-rs	53.6214	25199.7								region	IND	CMG-rs	16.9379	30439.9
	region	WEU	TAO-rs	53.6214	25199.7								region	OSA	CMG-rs	16.9379	30439.9
	region	WEU	TAO-rs	53.6214	25200.1								region	OSA	CMG-rs	16.9379	30441
	region	EEU	TAO-rs	53.6214	25200.1								region	JPN	CMG-rs	16.9379	30441
	region	EEU	TAO-rs	53.6214	25200.3								region	JPN	CMG-rs	16.9379	30442.1
	region	EAF	TAO-rs	53.6214	25200.3								region	OCN	CMG-rs	16.9379	30442.1
	region	EAF	TAO-rs	53.6214	25200.6								region	OCN	CMG-rs	16.9379	30445.9
	region	WCA	TAO-rs	53.6214	25200.6								region	PAS	CMG-rs	16.9379	30445.9
	region	WCA	TAO-rs	53.6214	25201.4								region	PAS	CMG-rs	16.9379	30447
	region	SAF	TAO-rs	53.6214	25201.4								region	LAC	CMG-rs	16.9379	30447
	region	SAF	TAO-rs	53.6214	25202								region	LAC	CMG-rs	16.9379	30452.6
	region	CHN	TAO-rs	53.6214	25202								region	USA	TIG-rs	19.3576	30452.6
	region	CHN	TAO-rs	53.6214	25202.2								region	USA	TIG-rs	19.3576	30480.9
	region	PAS	TAO-rs	53.6214	25202.2								region	CAN	TIG-rs	19.3576	30480.9
	region	PAS	TAO-rs	53.6214	25202.8								region	CAN	TIG-rs	19.3576	30497.3
	region	LAC	TAO-rs	53.6214	25202.8								region	WEU	TIG-rs	19.3576	30497.3
	region	LAC	TAO-rs	53.6214	25752.9								region	WEU	TIG-rs	19.3576	30501
	region	USA	SHO-rs	53.6214	25752.9								region	EEU	TIG-rs	19.3576	30501
	region	USA	SHO-rs	53.6214	26605.2								region	EEU	TIG-rs	19.3576	30504.7
	region	CAN	SHO-rs	53.6214	26605.2								region	FSU	TIG-rs	19.3576	30504.7
	region	CAN	SHO-rs	53.6214	26606.6								region	FSU	TIG-rs	19.3576	30530.8
	region	WEU	SHO-rs	53.6214	26606.6								region	NAF	TIG-rs	19.3576	30530.8
	region	WEU	SHO-rs	53.6214	26657.6								region	NAF	TIG-rs	19.3576	30538.3
	region	EEU	SHO-rs	53.6214	26657.6								region	EAF	TIG-rs	19.3576	30538.3
	region	EEU	SHO-rs	53.6214	26657.8								region	EAF	TIG-rs	19.3576	30542
	region	EAF	SHO-rs	53.6214	26657.8								region	WCA	TIG-rs	19.3576	30542
	region	EAF	SHO-rs	53.6214	26657.9								region	WCA	TIG-rs	19.3576	30553.2
	region	WCA	SHO-rs	53.6214	26657.9								region	SAF	TIG-rs	19.3576	30553.2
	region	WCA	SHO-rs	53.6214	26693.8								region	SAF	TIG-rs	19.3576	30556.9
	region	SAF	SHO-rs	53.6214	26693.8								region	MEE	TIG-rs	19.3576	30556.9
	region	SAF	SHO-rs	53.6214	26693.9								region	MEE	TIG-rs	19.3576	30571.8
	region	CHN	SHO-rs	53.6214	26693.9								region	CHN	TIG-rs	19.3576	30571.8
	region	CHN	SHO-rs	53.6214	26701								region	CHN	TIG-rs	19.3576	30575.5
	region	OEA	SHO-rs	53.6214	26701								region	OEA	TIG-rs	19.3576	30575.5
	region	OEA	SHO-rs	53.6214	26701.2								region	OEA	TIG-rs	19.3576	30579.2
	region	OCN	SHO-rs	53.6214	26701.2								region	IND	TIG-rs	19.3576	30579.2
	region	OCN	SHO-rs	53.6214	26715.4								region	IND	TIG-rs	19.3576	30583
	region	PAS	SHO-rs	53.6214	26715.4								region	OSA	TIG-rs	19.3576	30583
	region	PAS	SHO-rs	53.6214	26718.4								region	OSA	TIG-rs	19.3576	30590.4
	region	LAC	SHO-rs	53.6214	26718.4								region	OCN	TIG-rs	19.3576	30590.4
	region	LAC	SHO-rs	53.6214	26748.1								region	OCN	TIG-rs	19.3576	30594.1
	region	FSU	EHO-rs	53.9474	26748.1								region	PAS	TIG-rs	19.3576	30594.1
	region	FSU	EHO-rs	53.9474	26748.3								region	PAS	TIG-rs	19.3576	30601.6
	region	NAF	EHO-rs	53.9474	26748.3								region	LAC	TIG-rs	19.3576	30601.6
	region	NAF	EHO-rs	53.9474	26748.5								region	LAC	TIG-rs	19.3576	30612.8
	region	MEE	EHO-rs	53.9474	26748.5								region	USA	CMG-rs	19.8834	30612.8
	region	MEE	EHO-rs	53.9474	26836.6								region	USA	CMG-rs	19.8834	30629.5
	region	FSU	TAO-rs	53.9474	26836.6								region	CAN	CMG-rs	19.8834	30629.5
	region	FSU	TAO-rs	53.9474	27018.2								region	CAN	CMG-rs	19.8834	30635.1
	region	FSU	SHO-rs	53.9474	27018.2								region	WEU	CMG-rs	19.8834	30635.1
	region	FSU	SHO-rs	53.9474	27065								region	WEU	CMG-rs	19.8834	30640.7
	region	NAF	SHO-rs	53.9474	27065								region	EEU	CMG-rs	19.8834	30640.7
	region	NAF	SHO-rs	53.9474	27069.6								region	EEU	CMG-rs	19.8834	30642.6
	region	MEE	SHO-rs	53.9474	27069.6								region	FSU	CMG-rs	19.8834	30642.6
	region	MEE	SHO-rs	53.9474	27075.4								region	FSU	CMG-rs	19.8834	30661.2
	region	FSU	EHO-rs	65.7895	27075.4								region	NAF	CMG-rs	19.8834	30661.2
	region	FSU	EHO-rs	65.7895	27075.6								region	NAF	CMG-rs	19.8834	30664.9
	region	NAF	EHO-rs	65.7895	27075.6								region	EAF	CMG-rs	19.8834	30664.9
	region	NAF	EHO-rs	65.7895	27076								region	EAF	CMG-rs	19.8834	30666.8
	region	MEE	EHO-rs	65.7895	27076								region	WCA	CMG-rs	19.8834	30666.8
	region	MEE	EHO-rs	65.7895	27164.1								region	WCA	CMG-rs	19.8834	30668.7
	region	FSU	TAO-rs	65.7895	27164.1								region	SAF	CMG-rs	19.8834	30668.7
	region	FSU	TAO-rs	65.7895	27345.7								region	SAF	CMG-rs	19.8834	30670.5
	region	FSU	SHO-rs	65.7895	27345.7								region	MEE	CMG-rs	19.8834	30670.5
	region	FSU	SHO-rs	65.7895	27392.6								region	MEE	CMG-rs	19.8834	30672.4
	region	NAF	SHO-rs	65.7895	27392.6								region	CHN	CMG-rs	19.8834	30672.4
	region	NAF	SHO-rs	65.7895	27401.6								region	CHN	CMG-rs	19.8834	30687.3
	region	MEE	SHO-rs	65.7895	27401.6								region	OEA	CMG-rs	19.8834	30687.3
	region	MEE	SHO-rs	65.7895	27407.4								region	OEA	CMG-rs	19.8834	30687.7
	region	FSU	EHO-rs	78.6184	27407.4								region	IND	CMG-rs	19.8834	30687.7
	region	FSU	EHO-rs	78.6184	27407.9								region	IND	CMG-rs	19.8834	30693.2
	region	NAF	EHO-rs	78.6184	27407.9								region	OSA	CMG-rs	19.8834	30693.2
	region	NAF	EHO-rs	78.6184	27409.3								region	OSA	CMG-rs	19.8834	30694.4
	region	MEE	EHO-rs	78.6184	27409.3								region	JPN	CMG-rs	19.8834	30694.4
	region	MEE	EHO-rs	78.6184	27541.3								region	JPN	CMG-rs	19.8834	30695.5
	region	FSU	TAO-rs	78.6184	27541.3								region	OCN	CMG-rs	19.8834	30695.5
	region	FSU	TAO-rs	78.6184	27904.6								region	OCN	CMG-rs	19.8834	30699.2
	region	FSU	SHO-rs	78.6184	27904.6								region	PAS	CMG-rs	19.8834	30699.2
	region	FSU	SHO-rs	78.6184	27998.3								region	PAS	CMG-rs	19.8834	30700.3
	region	NAF	SHO-rs	78.6184	27998.3								region	LAC	CMG-rs	19.8834	30700.3
	region	NAF	SHO-rs	78.6184	28029.9								region	LAC	CMG-rs	19.8834	30705.9
	region	MEE	SHO-rs	78.6184	28029.9								region	USA	SHG-rs	20.0351	30705.9
	region	MEE	SHO-rs	78.6184	28038.7								region	USA	SHG-rs	20.0351	30722.3
													region	CAN	SHG-rs	20.0351	30722.3
													region	CAN	SHG-rs	20.0351	30726.8
													region	WEU	SHG-rs	20.0351	30726.8
													region	WEU	SHG-rs	20.0351	30730.5
													region	EEU	SHG-rs	20.0351	30730.5
													region	EEU	SHG-rs	20.0351	30731.3
													region	FSU	SHG-rs	20.0351	30731.3
													region	FSU	SHG-rs	20.0351	30752.9
													region	NAF	SHG-rs	20.0351	30752.9
													region	NAF	SHG-rs	20.0351	30761.5
													region	EAF	SHG-rs	20.0351	30761.5
													region	EAF	SHG-rs	20.0351	30762.2
													region	WCA	SHG-rs	20.0351	30762.2
													region	WCA	SHG-rs	20.0351	30765.2
													region	SAF	SHG-rs	20.0351	30765.2
													region	SAF	SHG-rs	20.0351	30773.9
													region	MEE	SHG-rs	20.0351	30773.9
													region	MEE	SHG-rs	20.0351	30775.4
													region	CHN	SHG-rs	20.0351	30775.4
													region	CHN	SHG-rs	20.0351	30800.8
													region	OEA	SHG-rs	20.0351	30800.8
													region	OEA	SHG-rs	20.0351	30801.6
													region	IND	SHG-rs	20.0351	30801.6
													region	IND	SHG-rs	20.0351	30802.3
													region	OSA	SHG-rs	20.0351	30802.3
													region	OSA	SHG-rs	20.0351	30804.6
													region	OCN	SHG-rs	20.0351	30804.6
													region	OCN	SHG-rs	20.0351	30809.9
													region	PAS	SHG-rs	20.0351	30809.9
													region	PAS	SHG-rs	20.0351	30810.7
													region	LAC	SHG-rs	20.0351	30810.7
													region	LAC	SHG-rs	20.0351	30847.9
													region	USA	TIG-rs	22.7239	30847.9
													region	USA	TIG-rs	22.7239	30876.2
													region	CAN	TIG-rs	22.7239	30876.2
													region	CAN	TIG-rs	22.7239	30892.6
													region	WEU	TIG-rs	22.7239	30892.6
													region	WEU	TIG-rs	22.7239	30896.4
													region	EEU	TIG-rs	22.7239	30896.4
													region	EEU	TIG-rs	22.7239	30900.1
													region	FSU	TIG-rs	22.7239	30900.1
													region	FSU	TIG-rs	22.7239	30926.2
													region	NAF	TIG-rs	22.7239	30926.2
													region	NAF	TIG-rs	22.7239	30933.6
													region	EAF	TIG-rs	22.7239	30933.6
													region	EAF	TIG-rs	22.7239	30937.3
													region	WCA	TIG-rs	22.7239	30937.3
													region	WCA	TIG-rs	22.7239	30948.5
													region	SAF	TIG-rs	22.7239	30948.5
													region	SAF	TIG-rs	22.7239	30952.2
													region	MEE	TIG-rs	22.7239	30952.2
													region	MEE	TIG-rs	22.7239	30967.1
													region	CHN	TIG-rs	22.7239	30967.1
													region	CHN	TIG-rs	22.7239	30970.9
													region	OEA	TIG-rs	22.7239	30970.9
													region	OEA	TIG-rs	22.7239	30974.6
													region	IND	TIG-rs	22.7239	30974.6
													region	IND	TIG-rs	22.7239	30978.3
													region	OSA	TIG-rs	22.7239	30978.3
													region	OSA	TIG-rs	22.7239	30985.8
													region	OCN	TIG-rs	22.7239	30985.8
													region	OCN	TIG-rs	22.7239	30989.5
													region	PAS	TIG-rs	22.7239	30989.5
													region	PAS	TIG-rs	22.7239	30996.9
													region	LAC	TIG-rs	22.7239	30996.9
													region	LAC	TIG-rs	22.7239	31008.1
													region	USA	CMG-rs	23.1235	31008.1
													region	USA	CMG-rs	23.1235	31020.7
													region	CAN	CMG-rs	23.1235	31020.7
													region	CAN	CMG-rs	23.1235	31024.9
													region	WEU	CMG-rs	23.1235	31024.9
													region	WEU	CMG-rs	23.1235	31029.1
													region	EEU	CMG-rs	23.1235	31029.1
													region	EEU	CMG-rs	23.1235	31030.5
													region	FSU	CMG-rs	23.1235	31030.5
													region	FSU	CMG-rs	23.1235	31044.5
													region	NAF	CMG-rs	23.1235	31044.5
													region	NAF	CMG-rs	23.1235	31047.3
													region	EAF	CMG-rs	23.1235	31047.3
													region	EAF	CMG-rs	23.1235	31048.6
													region	WCA	CMG-rs	23.1235	31048.6
													region	WCA	CMG-rs	23.1235	31050
													region	SAF	CMG-rs	23.1235	31050
													region	SAF	CMG-rs	23.1235	31051.4
													region	MEE	CMG-rs	23.1235	31051.4
													region	MEE	CMG-rs	23.1235	31052.8
													region	CHN	CMG-rs	23.1235	31052.8
													region	CHN	CMG-rs	23.1235	31064
													region	OEA	CMG-rs	23.1235	31064
													region	OEA	CMG-rs	23.1235	31064.3
													region	IND	CMG-rs	23.1235	31064.3
													region	IND	CMG-rs	23.1235	31068.5
													region	OSA	CMG-rs	23.1235	31068.5
													region	OSA	CMG-rs	23.1235	31069.3
													region	JPN	CMG-rs	23.1235	31069.3
													region	JPN	CMG-rs	23.1235	31070.2
													region	OCN	CMG-rs	23.1235	31070.2
													region	OCN	CMG-rs	23.1235	31073
													region	PAS	CMG-rs	23.1235	31073
													region	PAS	CMG-rs	23.1235	31073.8
													region	LAC	CMG-rs	23.1235	31073.8
													region	LAC	CMG-rs	23.1235	31078
													region	USA	SHG-rs	23.5192	31078
													region	USA	SHG-rs	23.5192	31094.4
													region	CAN	SHG-rs	23.5192	31094.4
													region	CAN	SHG-rs	23.5192	31098.8
													region	WEU	SHG-rs	23.5192	31098.8
													region	WEU	SHG-rs	23.5192	31102.5
													region	EEU	SHG-rs	23.5192	31102.5
													region	EEU	SHG-rs	23.5192	31103.3
													region	FSU	SHG-rs	23.5192	31103.3
													region	FSU	SHG-rs	23.5192	31124.9
													region	NAF	SHG-rs	23.5192	31124.9
													region	NAF	SHG-rs	23.5192	31133.6
													region	EAF	SHG-rs	23.5192	31133.6
													region	EAF	SHG-rs	23.5192	31134.3
													region	WCA	SHG-rs	23.5192	31134.3
													region	WCA	SHG-rs	23.5192	31137.3
													region	SAF	SHG-rs	23.5192	31137.3
													region	SAF	SHG-rs	23.5192	31146
													region	MEE	SHG-rs	23.5192	31146
													region	MEE	SHG-rs	23.5192	31147.5
													region	CHN	SHG-rs	23.5192	31147.5
													region	CHN	SHG-rs	23.5192	31172.9
													region	OEA	SHG-rs	23.5192	31172.9
													region	OEA	SHG-rs	23.5192	31173.6
													region	IND	SHG-rs	23.5192	31173.6
													region	IND	SHG-rs	23.5192	31174.4
													region	OSA	SHG-rs	23.5192	31174.4
													region	OSA	SHG-rs	23.5192	31176.6
													region	OCN	SHG-rs	23.5192	31176.6
													region	OCN	SHG-rs	23.5192	31182
													region	PAS	SHG-rs	23.5192	31182
													region	PAS	SHG-rs	23.5192	31182.7
													region	LAC	SHG-rs	23.5192	31182.7
													region	LAC	SHG-rs	23.5192	31220
													region	USA	TIG-rs	26.4268	31220
													region	USA	TIG-rs	26.4268	31241.2
													region	CAN	TIG-rs	26.4268	31241.2
													region	CAN	TIG-rs	26.4268	31253.5
													region	WEU	TIG-rs	26.4268	31253.5
													region	WEU	TIG-rs	26.4268	31256.3
													region	EEU	TIG-rs	26.4268	31256.3
													region	EEU	TIG-rs	26.4268	31259.1
													region	FSU	TIG-rs	26.4268	31259.1
													region	FSU	TIG-rs	26.4268	31278.7
													region	NAF	TIG-rs	26.4268	31278.7
													region	NAF	TIG-rs	26.4268	31284.3
													region	EAF	TIG-rs	26.4268	31284.3
													region	EAF	TIG-rs	26.4268	31287
													region	WCA	TIG-rs	26.4268	31287
													region	WCA	TIG-rs	26.4268	31295.4
													region	SAF	TIG-rs	26.4268	31295.4
													region	SAF	TIG-rs	26.4268	31298.2
													region	MEE	TIG-rs	26.4268	31298.2
													region	MEE	TIG-rs	26.4268	31309.4
													region	CHN	TIG-rs	26.4268	31309.4
													region	CHN	TIG-rs	26.4268	31312.2
													region	OEA	TIG-rs	26.4268	31312.2
													region	OEA	TIG-rs	26.4268	31315
													region	IND	TIG-rs	26.4268	31315
													region	IND	TIG-rs	26.4268	31317.8
													region	OSA	TIG-rs	26.4268	31317.8
													region	OSA	TIG-rs	26.4268	31323.4
													region	OCN	TIG-rs	26.4268	31323.4
													region	OCN	TIG-rs	26.4268	31326.2
													region	PAS	TIG-rs	26.4268	31326.2
													region	PAS	TIG-rs	26.4268	31331.7
													region	LAC	TIG-rs	26.4268	31331.7
													region	LAC	TIG-rs	26.4268	31340.1
													region	USA	SHG-rs	27.3518	31340.1
													region	USA	SHG-rs	27.3518	31352.4
													region	CAN	SHG-rs	27.3518	31352.4
													region	CAN	SHG-rs	27.3518	31355.8
													region	WEU	SHG-rs	27.3518	31355.8
													region	WEU	SHG-rs	27.3518	31358.5
													region	EEU	SHG-rs	27.3518	31358.5
													region	EEU	SHG-rs	27.3518	31359.1
													region	FSU	SHG-rs	27.3518	31359.1
													region	FSU	SHG-rs	27.3518	31375.3
													region	NAF	SHG-rs	27.3518	31375.3
													region	NAF	SHG-rs	27.3518	31381.8
													region	EAF	SHG-rs	27.3518	31381.8
													region	EAF	SHG-rs	27.3518	31382.4
													region	WCA	SHG-rs	27.3518	31382.4
													region	WCA	SHG-rs	27.3518	31384.6
													region	SAF	SHG-rs	27.3518	31384.6
													region	SAF	SHG-rs	27.3518	31391.1
													region	MEE	SHG-rs	27.3518	31391.1
													region	MEE	SHG-rs	27.3518	31392.3
													region	CHN	SHG-rs	27.3518	31392.3
													region	CHN	SHG-rs	27.3518	31411.3
													region	OEA	SHG-rs	27.3518	31411.3
													region	OEA	SHG-rs	27.3518	31411.9
													region	IND	SHG-rs	27.3518	31411.9
													region	IND	SHG-rs	27.3518	31412.4
													region	OSA	SHG-rs	27.3518	31412.4
													region	OSA	SHG-rs	27.3518	31414.1
													region	OCN	SHG-rs	27.3518	31414.1
													region	OCN	SHG-rs	27.3518	31418.1
													region	PAS	SHG-rs	27.3518	31418.1
													region	PAS	SHG-rs	27.3518	31418.7
													region	LAC	SHG-rs	27.3518	31418.7
													region	LAC	SHG-rs	27.3518	31446.6

## Sheet: 2. Oil data summary (vs SSP2)
	Reservoir type	Reserves/ Resources	Quantity		Cost
			Value (EJ)	Assumption	Value ($US/GJ)	Assumption
OIL	Conventional oil	Reserves	6741	Sources: BGR, USGS	1.20 – 5.69	Exp. (x 1.39) - Imp. (x 1.76)
		Resources	4171 (-8%)	No Arctic resources	1.54 – 12.05	Exp. (x 1.77) - Imp. (x 2.52)
	Sub-total		10912 (-3%)		1.74 – 19.13
	Oil sands	Reserves	1910	RR: 100%	6.94 – 15.63	( +5) x 1.98
		Resources	5461 (-39%)	RR: 20%	23.68 – 78.62	x 3
	Heavy and Extra-heavy oil	Reserves	343	RR: 100%	6.94 – 15.63	( +5) x 1.98
		Resources	2229 (-20%)	RR: 20%	23.68 – 78.62	x 3
	Shale oil	Reserves	1492	RR: 100%	6.94 – 15.63	( +5) x 1.98
		Resources	3458 (-39%)	RR: 20%	23.68 – 78.62	x 3
	Sub-total		14894 (-30%)		6.94 – 78.62
	Total		25806 (-21%)		1.20 – 78.62
	LEGEND
	Exp.	Exporters
	Imp.	Importers
	RR	Recovery rate

## Sheet: 3. Gas data summary (vs SSP2)
	Reservoir type	Reserves/ Resources	Quantity		Cost
			Value (EJ)	Assumption	Value ($US/GJ)	Assumption
GAS	Conventional gas	Reserves	7101	Sources: BGR, USGS	0.48 – 3.91	Exp. (x 2) - Imp. (x 4)
		Resources	8903 (-9%)	No Arctic resources	0.62 – 8.15	Exp. (x 2) - Imp. (x 4)
	Sub-total		16004 (-5%)		0.48 – 8.15
	CBM	Reserves	3250	RR: 80%	3.45 – 6.38	x 1.5
		Resources	466 (-64%)	RR: 5%	11.83 – 23.12	x 1
	Deep gas	Reserves	2033	RR: 50%	4.50 – 8.32	x 1.15
		Resources	0 (-100%)	RR: 0%	-	-
	Tight gas	Reserves	4592	RR: 80%	3.45 – 6.38	x 1.15
		Resources	801 (-29%)	RR: 10%	13.52 – 26.43	x 2
	Shale gas	Reserves	3591	RR: 57%	4.71 – 8.16	x 1.57
		Resources	710 (-75%)	0.1 x MAX(GEA, ARI)	13.99 – 27.35	x 2.07
	Hydrates	Reserves	0	-	-	-
		Resources	0	Hard limit	-	-
	Sub-total		15443 (-18%)		3.45 – 27.35
	Total		31447 (-12%)		0.48 – 27.35
	LEGEND
	Exp.	Exporters
	Imp.	Importers
	RR	Recovery rate

## Sheet: 4. Oil - Resources
	Oil resource data														Assumptions
#	Region code	Conventional		Unconventional											Conventional						Unconventional gas
		oil		oil		Oil sands		Heavy and Extra-heavy oil		Shale oil					oil						Oil sands						Heavy and Extra-heavy oil						Shale oil
		Reserves (EJ)	Resources (EJ)	Reserves (EJ)	Resources (EJ)	Reserves (EJ)	Resources (EJ)	Reserves (EJ)	Resources (EJ)	Reserves (EJ)	Resources (EJ)				Factor	Reserves (EJ)	C	Factor	Resources (EJ)	C	Recovery rate	Reserves (EJ)	C	Recovery rate	Resources (EJ)	C	Recovery rate	Reserves (EJ)	C	Recovery rate	Resources (EJ)	C	Recovery rate	Reserves (EJ)	C	Recovery rate	Resources (EJ)	C
1	USA	162	420	1435.65	3483.53	0	49.4461	66.5701	908.887	1369.08	2525.19				1	162	1	1	420	1	1	0	3	0.2	247.231	4	1	66.5701	3	0.2	4544.44	4	1	1369.08	3	0.2	12626	4
2	CAN	28	101	1149.32	2586.44	1149.28	2054.71	0.041868	513.302	0	18.4219				1	28	1	1	101	1	1	1149.28	3	0.2	10273.6	4	1	0.041868	3	0.2	2566.51	4	1	0	3	0.2	92.1096	4
3	WEU	88	186	8.20613	119.056	1.38164	0.887602	1.08857	4.85669	5.73592	113.312				1	88	1	1	186	1	1	1.38164	3	0.2	4.43801	4	1	1.08857	3	0.2	24.2834	4	1	5.73592	3	0.2	566.558	4
4	EEU	6	13	0.334944	0.946217	0	0.293076	0.251208	0.100483	0.083736	0.552658				1	6	1	1	13	1	1	0	3	0.2	1.46538	4	1	0.251208	3	0.2	0.502416	4	1	0.083736	3	0.2	2.76329	4
5	FSU	735	1008	759.234	1906.28	748.139	1513.48	0.879228	2.16039	10.2158	390.645				1	735	1	1	1008	1	1	748.139	3	0.2	7567.39	4	1	0.879228	3	0.2	10.8019	4	1	10.2158	3	0.2	1953.23	4
6	NAF	388	184	6.61514	78.402	0	0	0.334944	3.18197	6.2802	75.22				1	388	1	1	184	1	1	0	3	0.2	0	4	1	0.334944	3	0.2	15.9098	4	1	6.2802	3	0.2	376.1	4
7	EAF	4	13	1.46538	0.971338	1.46538	0.92947	0	0	0	0.041868				1	4	1	1	13	1	1	1.46538	3	0.2	4.64735	4	1	0	3	0.2	0	4	1	0	3	0.2	0.20934	4
8	WCA	254	302	4.0612	122.389	4.0612	2.56232	0	0	0	119.826				1	254	1	1	302	1	1	4.0612	3	0.2	12.8116	4	1	0	3	0.2	0	4	1	0	3	0.2	599.131	4
9	SAF	77	150	3.09823	2.11015	3.09823	1.95105	0	0	0	0.159098				1	77	1	1	150	1	1	3.09823	3	0.2	9.75524	4	1	0	3	0.2	0	4	1	0	3	0.2	0.795492	4
10	MEE	4286	889	55.3076	782.228	0	0	0.041868	733.695	55.2658	48.5334				1	4286	1	1	889	1	1	0	3	0.2	0	4	1	0.041868	3	0.2	3668.47	4	1	55.2658	3	0.2	242.667	4
11	CHN	84	97	12.9791	66.7041	0	0.74525	4.98229	46.7833	7.99679	19.1755				1	84	1	1	97	1	1	0	3	0.2	3.72625	4	1	4.98229	3	0.2	233.917	4	1	7.99679	3	0.2	95.8777	4
12	OEA	26	32	0	12.2422	0	0	0	11.8905	0	0.351691				1	26	1	1	32	1	1	0	3	0.2	0	4	1	0	3	0.2	59.4526	4	1	0	3	0.2	1.75846	4
13	IND	33	17	0	3.60065	0	0	0	3.60065	0	0				1	33	1	1	17	1	1	0	3	0.2	0	4	1	0	3	0.2	18.0032	4	1	0	3	0.2	0	4
14	OSA	2	13	0	0	0	0	0	0	0	0				1	2	1	1	13	1	1	0	3	0.2	0	4	1	0	3	0.2	0	4	1	0	3	0.2	0	4
15	JPN	0	0	0	0	0	0	0	0	0	0				1	0	1	1	0	1	1	0	3	0.2	0	4	1	0	3	0.2	0	4	1	0	3	0.2	0	4
16	OCN	24	44	21.6876	37.9659	0	0	0	0	21.6876	37.9659				1	24	1	1	44	1	1	0	3	0.2	0	4	1	0	3	0.2	0	4	1	21.6876	3	0.2	189.83	4
17	PAS	65	88	13.1047	11.924	2.93076	1.85894	0	0	10.1739	10.0651				1	65	1	1	88	1	1	2.93076	3	0.2	9.2947	4	1	0	3	0.2	0	4	1	10.1739	3	0.2	50.3253	4
18	LAC	479	614	274.528	1933.41	0	1833.82	268.918	0.83736	5.61031	98.7582				1	479	1	1	614	1	1	0	3	0.2	9169.09	4	1	268.918	3	0.2	4.1868	4	1	5.61031	3	0.2	493.791	4
19	SOO	0	0	0	0	0	0	0	0	0	0				0	0	-	0	0	-	0	0	-	0	0	-	0	0	-	0	0	-	0	0	-	0	0	-
20	ARC	0	0	0	0	0	0	0	0	0	0				0	0	-	0	767.761	2	0	0	-	0	0	-	0	0	-	0	0	-	0	0	-	0	0	-
	SUB-TOTAL	6741	4171	3745.6	11148.2	1910.35	5460.68	343.108	2229.3	1492.13	3458.22				C stands for comments (see below)
	TOTAL	10912		14893.8
	Grand TOTAL	25805.8													Comments
	Legend														#	Reference	Comment
	Reserves														1	1, 2	Using the most recent BGR data instead of USGS data (as reported in GEA Table 7.6 chap.7 p. 440)
	Resources														2	EJ	Scenario assumption: 0% of Arctic resources available
	Importer														3	EJ	Scenario assumption: Recovery rate for unconventional reserves set to 100%
	Exporter														4	EJ	Scenario assumption: Recovery rate for unconventional resources set to 20%
															References are listed in tab 'References' - Grey cells indicate default GEA assumptions/data - EJ: Expert judgement

## Sheet: 5. Oil - Production costs
	Oil production costs data									Assumptions
#	Reservoir type	Category	Regional distinction	Production costs ($/GJ)		# cost bins				#	Reservoir type	Category	Regional distinction	GEA extraction costs ($/GJ)		# cost bins	Cost multiplier	Cost mark-up ($/GJ)	C
				Min	Max									Min	Max
1	Conventional	Reserves	MEE, FSU	1.20495	7.21585	4				1	Conventional	Reserves	MEE, FSU	0.87	5.21	4	1.385	0	1
3		Reserves	rest	1.5312	9.1696	4				3		Reserves	rest	0.87	5.21	4	1.76	0	2
4		Resources	MEE, FSU	1.5399	9.2217	4				4		Resources	MEE, FSU	0.87	5.21	4	1.77	0	3
6		Resources	rest	2.1924	13.1292	4				6		Resources	rest	0.87	5.21	4	2.52	0	4
-	Unconventional	Reserves	all	6.94059	15.6328	6				-	Unconventional	Reserves	all	2.63	7.02	6	-	-
-		Resources	all	23.67	78.63	8				-		Resources	all	7.89	26.21	8	-	-
7	Oil Sands	Reserves	all	6.94059	15.6328	6				7	Oil Sands	Reserves	all	2.63	7.02	6	1.98	0.87535	5
8		Resources	all	23.67	78.63	8				8		Resources	all	7.89	26.21	8	3	0	6
9	Heavy and Extra-heavy oil	Reserves	all	6.94059	15.6328	6				9	Heavy and Extra-heavy oil	Reserves	all	2.63	7.02	6	1.98	0.87535	5
10		Resources	all	23.67	78.63	8				10		Resources	all	7.89	26.21	8	3	0	6
11	Shale oil	Reserves	all	6.94059	15.6328	6				11	Shale oil	Reserves	all	2.63	7.02	6	1.98	0.87535	5
12		Resources	all	23.67	78.63	8				12		Resources	all	7.89	26.21	8	3	0	6
										C stands for comments (see below)
										Comments (references are listed in tab 'References' )
										#	Reference	Comment
										1	11, EJ	Scenario assumption: Increasing costs of conventional reserves by a factor of 1.39 in the MEE and FSU regions. This cost adjustment reflects the significant cost increase over the past decade as shown by the CERA upstream indices (-21% c/w SSP2)
										2	11, EJ	Scenario assumption: Increasing costs of conventional reserves by a factor of 1.76 in the remaining regions. This cost adjustment reflects the significant cost increase over the past decade as shown by the CERA upstream indices (-30% c/w SSP2)
										3	11, EJ	Scenario assumption: Increasing costs of conventional resources by a factor of 1.77 in the MEE and FSU regions. This cost adjustment reflects the significant cost increase over the past decade as shown by the CERA upstream indices (as in SSP2)
										4	11, EJ	Scenario assumption: Increasing costs of conventional resources by a factor of 2.52 in the remaining regions. This cost adjustment reflects the significant cost increase over the past decade as shown by the CERA upstream indices (as in SSP2)
										5	EJ	Scenario assumption: Increasing costs of all unconventional reserves by a factor of 1.98
										6	EJ	Scenario assumption: Increasing costs of all unconventional resources by a factor of 3
										References are listed in tab 'References' - Grey cells indicate default GEA assumptions/data - EJ: Expert judgement
			1.27338

## Sheet: 6. Gas - Resources
	Gas resource data																		Assumptions
#	Region code	Conventional		Unconventional															Conventional						Unconventional gas
		Gas		Gas		Deep Gas		Coal-bed methane		Tight gas		Shale gas		Gas hydrates					Gas						Deep Gas						Coal-bed methane						Tight gas						Shale gas						Gas hydrates
		Reserves (EJ)	Resources (EJ)	Reserves (EJ)	Resources (EJ)	Reserves (EJ)	Resources (EJ)	Reserves (EJ)	Resources (EJ)	Reserves (EJ)	Resources (EJ)	Reserves (EJ)	Resources (EJ)	Reserves (EJ)	Resources (EJ)				Factor	Reserves (EJ)	C	Factor	Resources (EJ)	C	Recovery rate	Reserves (EJ)	C	Recovery rate	Resources (EJ)	C	Recovery rate	Reserves (EJ)	C	Recovery rate	Resources (EJ)	C	Recovery rate	Reserves (EJ)	C	Recovery rate	Resources (EJ)	C	Recovery rate	Reserves (EJ)	C	Recovery rate	Resources (EJ)	C	Recovery rate
1	USA	262	740	3073.61	307.41	372.5	0	744.8	83.85	894.4	141.6	1061.91	81.96	0	0				1	262	1	1	740	1	0.5	745	3	0	1677	4	0.8	931	5	0.05	1677	6	0.8	1118	7	0.1	1416	8	0.57	1863	9	0.02	4098	10	0
2	CAN	65	259	855.02	132.284	93	0	208.8	27.95	447.2	82	106.02	22.334	0	0				1	65	1	1	259	1	0.5	186	3	0	373	4	0.8	261	5	0.05	559	6	0.8	559	7	0.1	820	8	0.57	186	9	0.0598767	373	10	0
3	WEU	162	313	511.68	64.997	56	0	208.8	27.95	119.2	18.6	127.68	18.447	0	0				1	162	1	1	313	1	0.5	112	3	0	186	4	0.8	261	5	0.05	559	6	0.8	149	7	0.1	186	8	0.57	224	9	0.033	559	10	0
4	EEU	31	23	362.88	31.813	56	0	60	9.3	119.2	18.6	127.68	3.913	0	0				1	31	1	1	23	1	0.5	112	3	0	186	4	0.8	75	5	0.05	186	6	0.8	149	7	0.1	186	8	0.57	224	9	0.007	559	10	0
5	FSU	2352	4332	3263.35	331.59	559	0	596	93.15	834.4	130.4	1273.95	108.04	0	0				1	2352	1	1	4332	1	0.5	1118	3	0	1863	4	0.8	745	5	0.05	1863	6	0.8	1043	7	0.1	1304	8	0.57	2235	9	0.02	5402	10	0
6	NAF	310	324	629.03	99.075	186.5	0	119.2	18.65	238.4	37.3	84.93	43.125	0	0				1	310	1	1	324	1	0.5	373	3	0	559	4	0.8	149	5	0.05	373	6	0.8	298	7	0.1	373	8	0.57	149	9	0.115617	373	10	0
7	EAF	1	22	277.95	31.62	56	0	60	9.3	119.2	18.6	42.75	3.72	0	0				1	1	1	1	22	1	0.5	112	3	0	186	4	0.8	75	5	0.05	186	6	0.8	149	7	0.1	186	8	0.57	75	9	0.02	186	10	0
8	WCA	213	183	717.96	80.1	130.5	0	60	9.3	357.6	55.9	169.86	14.9	0	0				1	213	1	1	183	1	0.5	261	3	0	559	4	0.8	75	5	0.05	186	6	0.8	447	7	0.1	559	8	0.57	298	9	0.02	745	10	0
9	SAF	21	70	229.85	71.5675	37.5	0	60	9.3	89.6	18.6	42.75	43.6675	0	0				1	21	1	1	70	1	0.5	75	3	0	186	4	0.8	75	5	0.05	186	6	0.8	112	7	0.1	186	8	0.57	75	9	0.234772	186	10	0
10	MEE	2788	1309	722.63	91.26	130.5	0	60	9.3	447.2	74.5	84.93	7.46	0	0				1	2788	1	1	1309	1	0.5	261	3	0	559	4	0.8	75	5	0.05	186	6	0.8	559	7	0.1	745	8	0.57	149	9	0.02	373	10	0
11	CHN	91	370	617.05	220.113	37.5	0	447.2	74.5	89.6	18.6	42.75	127.013	0	0				1	91	1	1	370	1	0.5	75	3	0	186	4	0.8	559	5	0.05	1490	6	0.8	112	7	0.1	186	8	0.57	75	9	0.682863	186	10	0
12	OEA	26	60	132.35	24.17	0	0	0	1.85	89.6	18.6	42.75	3.72	0	0				1	26	1	1	60	1	0.5	0	3	0	37	4	0.8	0	5	0.05	37	6	0.8	112	7	0.1	186	8	0.57	75	9	0.02	186	10	0
13	IND	41	33	378.65	50.27	37.5	0	208.8	27.95	89.6	18.6	42.75	3.72	0	0				1	41	1	1	33	1	0.5	75	3	0	186	4	0.8	261	5	0.05	559	6	0.8	112	7	0.1	186	8	0.57	75	9	0.02	186	10	0
14	OSA	49	81	429.48	54.08	93	0	29.6	5.6	179.2	37.3	127.68	11.18	0	0				1	49	1	1	81	1	0.5	186	3	0	373	4	0.8	37	5	0.05	112	6	0.8	224	7	0.1	373	8	0.57	224	9	0.02	559	10	0
15	JPN	1	0	29.6	5.6	0	0	29.6	5.6	0	0	0	0	0	0				1	1	1	1	0	1	0.5	0	3	0	0	4	0.8	37	5	0.05	112	6	0.8	0	7	0.1	0	8	0.57	0	9	0.02	0	10	0
16	OCN	115	78	390.43	64.128	37.5	0	148.8	18.65	119.2	18.6	84.93	26.878	0	0				1	115	1	1	78	1	0.5	75	3	0	186	4	0.8	186	5	0.05	373	6	0.8	149	7	0.1	186	8	0.57	149	9	0.072059	373	10	0
17	PAS	274	304	289.05	46.62	37.5	0	29.6	5.6	179.2	37.3	42.75	3.72	0	0				1	274	1	1	304	1	0.5	75	3	0	186	4	0.8	37	5	0.05	112	6	0.8	224	7	0.1	373	8	0.57	75	9	0.02	186	10	0
18	LAC	299	402	555.33	270.033	112	0	179.2	27.95	179.2	55.9	84.93	186.183	0	0				1	299	1	1	402	1	0.5	224	3	0	559	4	0.8	224	5	0.05	559	6	0.8	224	7	0.1	559	8	0.57	149	9	0.49915	373	10	0
19	SOO	0	0	0	0	0	0	0	0	0	0	0	0	0	0				0	0	-	0	0	-	0	0	3	0	0	4	0	0	5	0	0	6	0	0	7	0	0	8	0	0	9	0	0	10	0
20	ARC	0	0	0	0	0	0	0	0	0	0	0	0	0	0				0	0	-	0	1748.3	2	0	0	3	0	0	4	0	0	5	0	0	6	0	0	7	0	0	8	0	0	9	0	0	10	0
	SUB-TOTAL	7101	8903	13465.9	1976.73	2032.5	0	3250.4	465.75	4592	801	3591	709.98	0	0				C stands for comments (see below)
	TOTAL	16004		15442.6
	Grand TOTAL	31446.6																	Comments
	Legend																		#	Reference	Comment
	Reserves																		1	1, 2	Using the most recent BGR data instead of USGS data (as reported in GEA Table 7.11 chap.7 p. 453)
	Resources																		2	EJ	Scenario assumption: Arctic resources not available
	Importer																		3	EJ	Scenario assumption: only 50% available for Deep gas reserves
	Exporter																		4	EJ	Scenario assumption: Deep gas resources not available
																			5	EJ	Scenario assumption: only 80% available for Coal-bed methane reserves
																			6	EJ	Scenario assumption: only 5% available for Coal-bed methane resources
																			7	EJ	Scenario assumption: only 80% available for Tight gas reserves
																			8	EJ	Scenario assumption: only 10% available for Tight gas resources
																			9	EJ	Scenario assumption: only 57% available for Shale gas reserves
																			10	1, 5, EJ	Scenario assumption: Maximum between GEA and ARI (Table 1-3 p. 1-5) and Expert judgement: only 10% available for Shale gas resources
																			11	EJ	Scenario assumption: Gas hydrates not available in this scenario
																			References are listed in tab 'References' - Grey cells indicate default GEA assumptions/data - EJ: Expert judgement
[truncated: 2 more columns]

## Sheet: 7. Gas - Production costs
	Gas production costs data									Assumptions
#	Reservoir type	Category	Regional distinction	Production costs ($/GJ)		# cost bins				#	Reservoir type	Category	Regional distinction	GEA extraction costs ($/GJ)		# cost bins	Cost multiplier	Cost mark-up ($/GJ)	C
				Min	Max									Min	Max
1	Conventional	Reserves	MEE, FSU	0.7	6.96	4				1	Conventional	Reserves	MEE, FSU	0.35	3.48	4	2	0	1
2		Reserves	rest	1.4	13.92	4				2		Reserves	rest	0.35	3.48	4	4	0	2
3		Resources	MEE, FSU	0.7	6.96	4				3		Resources	MEE, FSU	0.35	3.48	4	2	0	1
4		Resources	rest	1.4	13.92	4				4		Resources	rest	0.35	3.48	4	4	0	2
-	Unconventional	Reserves	all	3.45	8.325	4				-	Unconventional	Reserves	all	3	5.55	4	-	-	-
-		Resources	all	6.76	26.42	5				-		Resources	all	6.76	13.21	5	-	-	-
5	Deep Gas	Reserves	all	4.5	8.325	4				5	Deep Gas	Reserves	all	3	5.55	4	1.5	0	3
6		Resources	all	6.76	13.21	5				6		Resources	all	6.76	13.21	5	1	0	-
7	Coal-bed methane	Reserves	all	3.45	6.3825	4				7	Coal-bed methane	Reserves	all	3	5.55	4	1.15	0	4
8		Resources	all	11.83	23.1175	5				8		Resources	all	6.76	13.21	5	1.75	0	5
9	Tight gas	Reserves	all	3.45	6.3825	4				9	Tight gas	Reserves	all	3	5.55	4	1.15	0	6
10		Resources	all	13.52	26.42	5				10		Resources	all	6.76	13.21	5	2	0	7
11	Shale gas	Reserves	all	4.71	8.7135	4				11	Shale gas	Reserves	all	3	5.55	4	1.57	0	8
12		Resources	all	13.9932	27.3447	5				12		Resources	all	6.76	13.21	5	2.07	0	9
13	Gas hydrates	Reserves	all	3	5.55	4				13	Gas hydrates	Reserves	all	3	5.55	4	1	0	-
14		Resources	all	6.76	13.21	5				14		Resources	all	6.76	13.21	5	1	0	-
										C stands for comments (see below)
										Comments
										#	Reference	Comment
										1	11, EJ	Scenario assumption: Increasing costs of conventional reserves and resources by a factor of 2 in the MEE and FSU regions. This cost adjustment reflects the significant cost increase over the past decade as shown by the CERA upstream indices (+13% c/w SSP2)
										2	11, EJ	Scenario assumption: Increasing costs of conventional reserves and resources by a factor of 4 in the remaining regions. This cost adjustment reflects the significant cost increase over the past decade as shown by the CERA upstream indices (+56% c/w SSP2)
										3	EJ	Scenario assumption: Increasing costs of Deep gas reserves by 50%
										4	EJ	Scenario assumption: Increasing costs of Coal-bed methane reserves by 15%
										5	EJ	Scenario assumption: Increasing costs of Coal-bed methane resources by 75%
										6	EJ	Scenario assumption: Increasing costs of Tight gas reserves by 15%
										7	EJ	Scenario assumption: Increasing costs of Tight gas resources by a factor of 2
										8	12, EJ	Scenario assumption: Increasing costs of Shale gas reserves by 57%
										9	12, EJ	Scenario assumption: Increasing costs of Shale gas resources by 107%
										References are listed in tab 'References' - Grey cells indicate default GEA assumptions/data - EJ: Expert judgement

## Sheet: 8. References
	References
#	Author(s)	Organisation	Publisher	Title	Year	URL
1	Rogner H.-H. et al.	IIASA	IIASA	Global Energy Assessment - Chapter 7	2012	http://www.iiasa.ac.at/web/home/research/researchPrograms/Energy/Chapters_Home.en.html
2	BGR	BGR	BGR	Energierohstoffe 2009	2009	http://www.bgr.bund.de/DE/Themen/Energie/Produkte/energierohstoffe_2009.html
3	Bird K.J. et al.	USGS	USGS	Circum-Arctic Resource Appraisal: Estimates of Undiscovered Oil and Gas North of the Arctic Circle	2008	http://pubs.usgs.gov/fs/2008/3049/
4	Klett T.R. et al.	USGS	USGS	Assessment of Potential Additions to Conventional Oil and Gas Resources of the World (Outside the United States) from Reserve Growth	2012	http://pubs.usgs.gov/fs/2012/3052/
5	Kuuskraa V. et al.	ARI	ARI	World shale gas resources: An initial assessment of 14 regions outside the US	2011	http://www.eia.gov/analysis/studies/worldshalegas/
6	Dyni J.R.	USGS	USGS	Geology and Resources of Some World Oil-Shale Deposits	2005	http://pubs.usgs.gov/sir/2005/5294/
7	Brandt A.R.	U. of Berkley	Environ. Science & Tech.	Converting oil shale to liquid fuels: energy inputs and greenhouse fas emissions of the shell in situ conversion process	2008	http://pubs.acs.org/doi/abs/10.1021/es800531f
8	IEA	IEA	IEA	World Energy Outlook	2008	http://www.worldenergyoutlook.org/publications/2008-1994/
9	RAND	RAND	RAND		2007	www.rand.org/pubs/monographs/2005/RAND_MG414.pdf
10	Tipee B.		Oil & Gas journal	Steady growth seen for Canadian bitumen output despite increasing needs for pipeline capacity, gas	2012	http://www.ogj.com/articles/print/vol-110/issue-5/drilling-production/steady-growth-seen-for-canadian.html
11	CERA	CERA	CERA	CERA Upstream Capital and Operating costs indices	2012	http://www.ihs.com/info/cera/ihsindexes/index.aspx
12	IEA	IEA	IEA	Golden Rules for a Golden Age of Gas	2012	http://www.worldenergyoutlook.org/goldenrules/

## Sheet: 9. Definitions
	Definitions
	Reserves
	Resources
	Long-term supply cost curve
	Cumulative Extraction Cost Curve
	Cumulative Availability Curve
	Production cost
	Recovery rate
	Regions	Same as in GEA

[truncated: 1 more sheets: 10. Revision information]
