# Supplementary material for: Data on fossil fuel availability for Shared Socioeconomic Pathways
Source: Data Brief. 2016 Nov 18;10:44–6. doi: 10.1016/j.dib.2016.11.043 (PMC5137328; doi:10.1016/j.dib.2016.11.043)
Supplement: Supplementary file 11 — Supplementary material [file mmc11.xlsx]

## Sheet: 0. Information
	Scenario name	SSP5
	Date of initial assessment	2012-11-01
	Revision number	4
	Last revision date	2013-01-07
	Authors	Jerome Hilaire and Nico Bauer
	Affiliation	Potsdam Institute for Climate Impact Research
	Contacts	hilaire@pik-potsdam.de or bauer@pik-potsdam.de
	Where to find the relevant information?
	This Excel workbook contains a collection of spreadsheet that describe oil and gas data. The colour code of the list below follows that of the spreadsheet tabs. Supply cost curves are displayed in spreadsheet 1. Data are further given on 3 levels with increasing degree of information. Oil and gas data summaries provide the basic information (spreadsheet 2 and 3). Oil and gas resources and costs d…
	0. Information (this spreadsheet)
	1. Oil and gas supply-cost curves
	2. Oil data summary (vs original GEA)
	3. Gas data summary (vs original GEA)
	4. Oil resources (quantities)
	5. Oil production costs
	6. Gas resources (quantities)
	7. Gas production costs
	8. References
	9. Definitions
	10. Revision information
	How to read these data?
	Red fonts indicate a change in the data.
	Green backgrounds are used for reserves
	Orange backgrounds are used for resources
	Blue backgrounds are used for conventional resources
	Violet backgrounds are used for unconventional resources

## Sheet: 1. Supply-cost curves
	Oil and gas supply cost curves
	Oil data												Gas data
	Updated GEA (SSP5)						GEA						Updated GEA (SSP5)						GEA
	v_curSpaTyp	v_curSpaItm	v_curffTyp	v_curCost	v_curQty		$/GJ	EJ					v_curSpaTyp	v_curSpaItm	v_curffTyp	v_curCost	v_curQty		$/GJ	EJ
	region	USA	COO-rv	0.87	0		0.87	0					region	USA	COG-rv	0.35	0		0.5	0
	region	USA	COO-rv	0.87	7.29221		0.87	828.409					region	USA	COG-rv	0.35	53.2379		0.5	2257.05
	region	NAF	COO-rv	0.87	7.29221		1.0225	828.409					region	CAN	COG-rv	0.35	53.2379		1.07	2257.05
	region	NAF	COO-rv	0.87	15.1831		1.0225	1656.82					region	CAN	COG-rv	0.35	64.0454		1.07	5405.92
	region	EAF	COO-rv	0.87	15.1831		1.175	1656.82					region	WEU	COG-rv	0.35	64.0454		1.5	5405.92
	region	EAF	COO-rv	0.87	15.2644		1.175	3313.64					region	WEU	COG-rv	0.35	104.544		1.5	8488.47
	region	WCA	COO-rv	0.87	15.2644		1.48	3313.64					region	EEU	COG-rv	0.35	104.544		2	8488.47
	region	WCA	COO-rv	0.87	61.5032		1.48	6629.93					region	EEU	COG-rv	0.35	109.557		2	10080.6
	region	SAF	COO-rv	0.87	61.5032		2.1925	6629.93					region	FSU	COG-rv	0.35	109.557		2.75	10080.6
	region	SAF	COO-rv	0.87	66.3558		2.1925	8341.96					region	FSU	COG-rv	0.35	507.578		2.75	10451.4
	region	MEE	COO-rv	0.87	66.3558		2.965	8341.96					region	NAF	COG-rv	0.35	507.578		3	10451.4
	region	MEE	COO-rv	0.87	1137.86		2.965	9473.07					region	NAF	COG-rv	0.35	528.299		3	14482.6
	region	IND	COO-rv	0.87	1137.86		2.965	9473.07					region	EAF	COG-rv	0.35	528.299		3.7	14482.6
	region	IND	COO-rv	0.87	1138.45		2.965	10329.1					region	EAF	COG-rv	0.35	528.366		3.7	19521.6
	region	OSA	COO-rv	0.87	1138.45		3.50877	10329.1					region	WCA	COG-rv	0.35	528.366		4.54	19521.6
	region	OSA	COO-rv	0.87	1138.49		3.50877	11490.4					region	WCA	COG-rv	0.35	581.616		4.54	25568.5
	region	OCN	COO-rv	0.87	1138.49		4.38596	11490.4					region	SAF	COG-rv	0.35	581.616		5.548	25568.5
	region	OCN	COO-rv	0.87	1139.13		4.38596	11880.9					region	SAF	COG-rv	0.35	586.866		5.548	30607.5
	region	PAS	COO-rv	0.87	1139.13		4.38596	11880.9					region	MEE	COG-rv	0.35	586.866		6.7576	30607.5
	region	PAS	COO-rv	0.87	1143.84		4.38596	12271.5					region	MEE	COG-rv	0.35	1283.87		6.7576	32419.8
	region	LAC	COO-rv	0.87	1143.84		5.26316	12271.5					region	CHN	COG-rv	0.35	1283.87		8.14864	32419.8
	region	LAC	COO-rv	0.87	1179.8		5.26316	13414.8					region	CHN	COG-rv	0.35	1306.62		8.14864	34232.2
	region	MEE	COO-rs	0.87	1179.8		7.01754	13414.8					region	OEA	COG-rv	0.35	1306.62		9.67878	34232.2
	region	MEE	COO-rs	0.87	1187.68		7.01754	14186.5					region	OEA	COG-rv	0.35	1313.12		9.67878	35843.2
	region	USA	COO-rv	1.0225	1187.68		7.01754	14186.5					region	IND	COG-rv	0.35	1313.12		11.3619	35843.2
	region	USA	COO-rv	1.0225	1194.97		7.01754	15373.7					region	IND	COG-rv	0.35	1316.67		11.3619	37454.2
	region	NAF	COO-rv	1.0225	1194.97		8.77193	15373.7					region	OSA	COG-rv	0.35	1316.67		13.2134	37454.2
	region	NAF	COO-rv	1.0225	1202.86		8.77193	17438.7					region	OSA	COG-rv	0.35	1326.46		13.2134	43662.4
	region	EAF	COO-rv	1.0225	1202.86		8.77193	17438.7					region	JPN	COG-rv	0.35	1326.46
	region	EAF	COO-rv	1.0225	1202.94		8.77193	18856.3					region	JPN	COG-rv	0.35	1326.66
	region	WCA	COO-rv	1.0225	1202.94		10.0877	18856.3					region	OCN	COG-rv	0.35	1326.66
	region	WCA	COO-rv	1.0225	1249.18		10.0877	20281.4					region	OCN	COG-rv	0.35	1355.41
	region	SAF	COO-rv	1.0225	1249.18		12.0614	20281.4					region	PAS	COG-rv	0.35	1355.41
	region	SAF	COO-rv	1.0225	1254.03		12.0614	22874.5					region	PAS	COG-rv	0.35	1401.41
	region	MEE	COO-rv	1.0225	1254.03		14.693	22874.5					region	LAC	COG-rv	0.35	1401.41
	region	MEE	COO-rv	1.0225	2325.53		14.693	25971.9					region	LAC	COG-rv	0.35	1464.2
	region	IND	COO-rv	1.0225	2325.53		17.9825	25971.9					region	WCA	COG-rs	0.35	1464.2
	region	IND	COO-rv	1.0225	2326.13		17.9825	28098.4					region	WCA	COG-rs	0.35	1475.66
	region	OSA	COO-rv	1.0225	2326.13		21.9298	28098.4					region	SAF	COG-rs	0.35	1475.66
	region	OSA	COO-rv	1.0225	2326.17		21.9298	30236					region	SAF	COG-rs	0.35	1481.65
	region	OCN	COO-rv	1.0225	2326.17		26.2061	30236					region	MEE	COG-rs	0.35	1481.65
	region	OCN	COO-rv	1.0225	2326.81		26.2061	34125.6					region	MEE	COG-rs	0.35	1550.54
	region	PAS	COO-rv	1.0225	2326.81								region	CHN	COG-rs	0.35	1550.54
	region	PAS	COO-rv	1.0225	2331.52								region	CHN	COG-rs	0.35	1565.55
	region	LAC	COO-rv	1.0225	2331.52								region	OEA	COG-rs	0.35	1565.55
	region	LAC	COO-rv	1.0225	2367.47								region	OEA	COG-rs	0.35	1567.98
	region	MEE	COO-rs	1.0225	2367.47								region	OCN	COG-rs	0.35	1567.98
	region	MEE	COO-rs	1.0225	2375.36								region	OCN	COG-rs	0.35	1570.98
	region	USA	COO-rv	1.175	2375.36								region	USA	COG-rv	0.5025	1570.98
	region	USA	COO-rv	1.175	2382.65								region	USA	COG-rv	0.5025	1624.22
	region	NAF	COO-rv	1.175	2382.65								region	CAN	COG-rv	0.5025	1624.22
	region	NAF	COO-rv	1.175	2390.54								region	CAN	COG-rv	0.5025	1635.03
	region	EAF	COO-rv	1.175	2390.54								region	WEU	COG-rv	0.5025	1635.03
	region	EAF	COO-rv	1.175	2390.62								region	WEU	COG-rv	0.5025	1675.53
	region	WCA	COO-rv	1.175	2390.62								region	EEU	COG-rv	0.5025	1675.53
	region	WCA	COO-rv	1.175	2436.86								region	EEU	COG-rv	0.5025	1680.54
	region	SAF	COO-rv	1.175	2436.86								region	FSU	COG-rv	0.5025	1680.54
	region	SAF	COO-rv	1.175	2441.71								region	FSU	COG-rv	0.5025	2078.56
	region	MEE	COO-rv	1.175	2441.71								region	NAF	COG-rv	0.5025	2078.56
	region	MEE	COO-rv	1.175	3513.21								region	NAF	COG-rv	0.5025	2099.28
	region	IND	COO-rv	1.175	3513.21								region	EAF	COG-rv	0.5025	2099.28
	region	IND	COO-rv	1.175	3513.81								region	EAF	COG-rv	0.5025	2099.35
	region	OSA	COO-rv	1.175	3513.81								region	WCA	COG-rv	0.5025	2099.35
	region	OSA	COO-rv	1.175	3513.85								region	WCA	COG-rv	0.5025	2152.6
	region	OCN	COO-rv	1.175	3513.85								region	SAF	COG-rv	0.5025	2152.6
	region	OCN	COO-rv	1.175	3514.49								region	SAF	COG-rv	0.5025	2157.85
	region	PAS	COO-rv	1.175	3514.49								region	MEE	COG-rv	0.5025	2157.85
	region	PAS	COO-rv	1.175	3519.2								region	MEE	COG-rv	0.5025	2854.85
	region	LAC	COO-rv	1.175	3519.2								region	CHN	COG-rv	0.5025	2854.85
	region	LAC	COO-rv	1.175	3555.15								region	CHN	COG-rv	0.5025	2877.6
	region	MEE	COO-rs	1.175	3555.15								region	OEA	COG-rv	0.5025	2877.6
	region	MEE	COO-rs	1.175	3563.03								region	OEA	COG-rv	0.5025	2884.1
	region	USA	COO-rv	1.3275	3563.03								region	IND	COG-rv	0.5025	2884.1
	region	USA	COO-rv	1.3275	3570.33								region	IND	COG-rv	0.5025	2887.66
	region	NAF	COO-rv	1.3275	3570.33								region	OSA	COG-rv	0.5025	2887.66
	region	NAF	COO-rv	1.3275	3578.22								region	OSA	COG-rv	0.5025	2897.45
	region	EAF	COO-rv	1.3275	3578.22								region	JPN	COG-rv	0.5025	2897.45
	region	EAF	COO-rv	1.3275	3578.3								region	JPN	COG-rv	0.5025	2897.65
	region	WCA	COO-rv	1.3275	3578.3								region	OCN	COG-rv	0.5025	2897.65
	region	WCA	COO-rv	1.3275	3624.54								region	OCN	COG-rv	0.5025	2926.4
	region	SAF	COO-rv	1.3275	3624.54								region	PAS	COG-rv	0.5025	2926.4
	region	SAF	COO-rv	1.3275	3629.39								region	PAS	COG-rv	0.5025	2972.4
	region	MEE	COO-rv	1.3275	3629.39								region	LAC	COG-rv	0.5025	2972.4
	region	MEE	COO-rv	1.3275	4700.89								region	LAC	COG-rv	0.5025	3035.19
	region	IND	COO-rv	1.3275	4700.89								region	WCA	COG-rs	0.5025	3035.19
	region	IND	COO-rv	1.3275	4701.49								region	WCA	COG-rs	0.5025	3046.65
	region	OSA	COO-rv	1.3275	4701.49								region	SAF	COG-rs	0.5025	3046.65
	region	OSA	COO-rv	1.3275	4701.52								region	SAF	COG-rs	0.5025	3052.64
	region	OCN	COO-rv	1.3275	4701.52								region	MEE	COG-rs	0.5025	3052.64
	region	OCN	COO-rv	1.3275	4702.17								region	MEE	COG-rs	0.5025	3121.53
	region	PAS	COO-rv	1.3275	4702.17								region	CHN	COG-rs	0.5025	3121.53
	region	PAS	COO-rv	1.3275	4706.88								region	CHN	COG-rs	0.5025	3136.53
	region	LAC	COO-rv	1.3275	4706.88								region	OEA	COG-rs	0.5025	3136.53
	region	LAC	COO-rv	1.3275	4742.83								region	OEA	COG-rs	0.5025	3138.96
	region	MEE	COO-rs	1.3275	4742.83								region	OCN	COG-rs	0.5025	3138.96
	region	MEE	COO-rs	1.3275	4750.71								region	OCN	COG-rs	0.5025	3141.97
	region	USA	COO-rv	1.48	4750.71								region	USA	COG-rv	0.655	3141.97
	region	USA	COO-rv	1.48	4783.92								region	USA	COG-rv	0.655	3195.21
	region	CAN	COO-rv	1.48	4783.92								region	CAN	COG-rv	0.655	3195.21
	region	CAN	COO-rv	1.48	4785.58								region	CAN	COG-rv	0.655	3206.01
	region	EEU	COO-rv	1.48	4785.58								region	WEU	COG-rv	0.655	3206.01
	region	EEU	COO-rv	1.48	4785.79								region	WEU	COG-rv	0.655	3246.51
	region	FSU	COO-rv	1.48	4785.79								region	EEU	COG-rv	0.655	3246.51
	region	FSU	COO-rv	1.48	4951.08								region	EEU	COG-rv	0.655	3251.53
	region	NAF	COO-rv	1.48	4951.08								region	FSU	COG-rv	0.655	3251.53
	region	NAF	COO-rv	1.48	5036.97								region	FSU	COG-rv	0.655	3649.55
	region	EAF	COO-rv	1.48	5036.97								region	NAF	COG-rv	0.655	3649.55
	region	EAF	COO-rv	1.48	5037.86								region	NAF	COG-rv	0.655	3670.27
	region	WCA	COO-rv	1.48	5037.86								region	EAF	COG-rv	0.655	3670.27
	region	WCA	COO-rv	1.48	5055.12								region	EAF	COG-rv	0.655	3670.33
	region	SAF	COO-rv	1.48	5055.12								region	WCA	COG-rv	0.655	3670.33
	region	SAF	COO-rv	1.48	5069.52								region	WCA	COG-rv	0.655	3723.58
	region	CHN	COO-rv	1.48	5069.52								region	SAF	COG-rv	0.655	3723.58
	region	CHN	COO-rv	1.48	5071.27								region	SAF	COG-rv	0.655	3728.83
	region	OEA	COO-rv	1.48	5071.27								region	MEE	COG-rv	0.655	3728.83
	region	OEA	COO-rv	1.48	5071.81								region	MEE	COG-rv	0.655	4425.83
	region	IND	COO-rv	1.48	5071.81								region	CHN	COG-rv	0.655	4425.83
	region	IND	COO-rv	1.48	5076								region	CHN	COG-rv	0.655	4448.58
	region	OSA	COO-rv	1.48	5076								region	OEA	COG-rv	0.655	4448.58
	region	OSA	COO-rv	1.48	5076.25								region	OEA	COG-rv	0.655	4455.08
	region	OCN	COO-rv	1.48	5076.25								region	IND	COG-rv	0.655	4455.08
	region	OCN	COO-rv	1.48	5080.38								region	IND	COG-rv	0.655	4458.64
	region	PAS	COO-rv	1.48	5080.38								region	OSA	COG-rv	0.655	4458.64
	region	PAS	COO-rv	1.48	5091.92								region	OSA	COG-rv	0.655	4468.43
	region	LAC	COO-rv	1.48	5091.92								region	JPN	COG-rv	0.655	4468.43
	region	LAC	COO-rv	1.48	5175.72								region	JPN	COG-rv	0.655	4468.63
	region	USA	COO-rs	1.48	5175.72								region	OCN	COG-rv	0.655	4468.63
	region	USA	COO-rs	1.48	5189.19								region	OCN	COG-rv	0.655	4497.38
	region	WCA	COO-rs	1.48	5189.19								region	PAS	COG-rv	0.655	4497.38
	region	WCA	COO-rs	1.48	5262.66								region	PAS	COG-rv	0.655	4543.38
	region	SAF	COO-rs	1.48	5262.66								region	LAC	COG-rv	0.655	4543.38
	region	SAF	COO-rs	1.48	5274.82								region	LAC	COG-rv	0.655	4606.17
	region	MEE	COO-rs	1.48	5274.82								region	WCA	COG-rs	0.655	4606.17
	region	MEE	COO-rs	1.48	5523.24								region	WCA	COG-rs	0.655	4617.63
	region	PAS	COO-rs	1.48	5523.24								region	SAF	COG-rs	0.655	4617.63
	region	PAS	COO-rs	1.48	5528.78								region	SAF	COG-rs	0.655	4623.62
	region	LAC	COO-rs	1.48	5528.78								region	MEE	COG-rs	0.655	4623.62
	region	LAC	COO-rs	1.48	5559.58								region	MEE	COG-rs	0.655	4692.51
	region	USA	COO-rv	1.7175	5559.58								region	CHN	COG-rs	0.655	4692.51
	region	USA	COO-rv	1.7175	5592.79								region	CHN	COG-rs	0.655	4707.51
	region	CAN	COO-rv	1.7175	5592.79								region	OEA	COG-rs	0.655	4707.51
	region	CAN	COO-rv	1.7175	5594.46								region	OEA	COG-rs	0.655	4709.95
	region	EEU	COO-rv	1.7175	5594.46								region	OCN	COG-rs	0.655	4709.95
	region	EEU	COO-rv	1.7175	5594.66								region	OCN	COG-rs	0.655	4712.95
	region	FSU	COO-rv	1.7175	5594.66								region	USA	COG-rv	0.8075	4712.95
	region	FSU	COO-rv	1.7175	5759.95								region	USA	COG-rv	0.8075	4766.19
	region	NAF	COO-rv	1.7175	5759.95								region	CAN	COG-rv	0.8075	4766.19
	region	NAF	COO-rv	1.7175	5845.85								region	CAN	COG-rv	0.8075	4777
	region	EAF	COO-rv	1.7175	5845.85								region	WEU	COG-rv	0.8075	4777
	region	EAF	COO-rv	1.7175	5846.73								region	WEU	COG-rv	0.8075	4817.5
	region	WCA	COO-rv	1.7175	5846.73								region	EEU	COG-rv	0.8075	4817.5
	region	WCA	COO-rv	1.7175	5863.99								region	EEU	COG-rv	0.8075	4822.51
	region	SAF	COO-rv	1.7175	5863.99								region	FSU	COG-rv	0.8075	4822.51
	region	SAF	COO-rv	1.7175	5878.39								region	FSU	COG-rv	0.8075	5220.53
	region	CHN	COO-rv	1.7175	5878.39								region	NAF	COG-rv	0.8075	5220.53
	region	CHN	COO-rv	1.7175	5880.14								region	NAF	COG-rv	0.8075	5241.25
	region	OEA	COO-rv	1.7175	5880.14								region	EAF	COG-rv	0.8075	5241.25
	region	OEA	COO-rv	1.7175	5880.69								region	EAF	COG-rv	0.8075	5241.32
	region	IND	COO-rv	1.7175	5880.69								region	WCA	COG-rv	0.8075	5241.32
	region	IND	COO-rv	1.7175	5884.87								region	WCA	COG-rv	0.8075	5294.57
	region	OSA	COO-rv	1.7175	5884.87								region	SAF	COG-rv	0.8075	5294.57
	region	OSA	COO-rv	1.7175	5885.13								region	SAF	COG-rv	0.8075	5299.82
	region	OCN	COO-rv	1.7175	5885.13								region	MEE	COG-rv	0.8075	5299.82
	region	OCN	COO-rv	1.7175	5889.25								region	MEE	COG-rv	0.8075	5996.82
	region	PAS	COO-rv	1.7175	5889.25								region	CHN	COG-rv	0.8075	5996.82
	region	PAS	COO-rv	1.7175	5900.79								region	CHN	COG-rv	0.8075	6019.57
	region	LAC	COO-rv	1.7175	5900.79								region	OEA	COG-rv	0.8075	6019.57
	region	LAC	COO-rv	1.7175	5984.59								region	OEA	COG-rv	0.8075	6026.07
	region	USA	COO-rs	1.7175	5984.59								region	IND	COG-rv	0.8075	6026.07
	region	USA	COO-rs	1.7175	5998.06								region	IND	COG-rv	0.8075	6029.63
	region	WCA	COO-rs	1.7175	5998.06								region	OSA	COG-rv	0.8075	6029.63
	region	WCA	COO-rs	1.7175	6071.53								region	OSA	COG-rv	0.8075	6039.42
	region	SAF	COO-rs	1.7175	6071.53								region	JPN	COG-rv	0.8075	6039.42
	region	SAF	COO-rs	1.7175	6083.69								region	JPN	COG-rv	0.8075	6039.62
	region	MEE	COO-rs	1.7175	6083.69								region	OCN	COG-rv	0.8075	6039.62
	region	MEE	COO-rs	1.7175	6332.11								region	OCN	COG-rv	0.8075	6068.37
	region	PAS	COO-rs	1.7175	6332.11								region	PAS	COG-rv	0.8075	6068.37
	region	PAS	COO-rs	1.7175	6337.65								region	PAS	COG-rv	0.8075	6114.37
	region	LAC	COO-rs	1.7175	6337.65								region	LAC	COG-rv	0.8075	6114.37
	region	LAC	COO-rs	1.7175	6368.46								region	LAC	COG-rv	0.8075	6177.16
	region	USA	COO-rv	1.955	6368.46								region	WCA	COG-rs	0.8075	6177.16
	region	USA	COO-rv	1.955	6401.67								region	WCA	COG-rs	0.8075	6188.61
	region	CAN	COO-rv	1.955	6401.67								region	SAF	COG-rs	0.8075	6188.61
	region	CAN	COO-rv	1.955	6403.33								region	SAF	COG-rs	0.8075	6194.6
	region	EEU	COO-rv	1.955	6403.33								region	MEE	COG-rs	0.8075	6194.6
	region	EEU	COO-rv	1.955	6403.54								region	MEE	COG-rs	0.8075	6263.49
	region	FSU	COO-rv	1.955	6403.54								region	CHN	COG-rs	0.8075	6263.49
	region	FSU	COO-rv	1.955	6568.83								region	CHN	COG-rs	0.8075	6278.5
	region	NAF	COO-rv	1.955	6568.83								region	OEA	COG-rs	0.8075	6278.5
	region	NAF	COO-rv	1.955	6654.72								region	OEA	COG-rs	0.8075	6280.93
	region	EAF	COO-rv	1.955	6654.72								region	OCN	COG-rs	0.8075	6280.93
	region	EAF	COO-rv	1.955	6655.61								region	OCN	COG-rs	0.8075	6283.94
	region	WCA	COO-rv	1.955	6655.61								region	USA	COG-rv	0.96	6283.94
	region	WCA	COO-rv	1.955	6672.87								region	USA	COG-rv	0.96	6296.2
	region	SAF	COO-rv	1.955	6672.87								region	CAN	COG-rv	0.96	6296.2
	region	SAF	COO-rv	1.955	6687.27								region	CAN	COG-rv	0.96	6301.64
	region	CHN	COO-rv	1.955	6687.27								region	WEU	COG-rv	0.96	6301.64
	region	CHN	COO-rv	1.955	6689.02								region	WEU	COG-rv	0.96	6301.64
	region	OEA	COO-rv	1.955	6689.02								region	EEU	COG-rv	0.96	6301.64
	region	OEA	COO-rv	1.955	6689.56								region	EEU	COG-rv	0.96	6304.38
	region	IND	COO-rv	1.955	6689.56								region	FSU	COG-rv	0.96	6304.38
	region	IND	COO-rv	1.955	6693.75								region	FSU	COG-rv	0.96	6494.36
	region	OSA	COO-rv	1.955	6693.75								region	NAF	COG-rv	0.96	6494.36
	region	OSA	COO-rv	1.955	6694								region	NAF	COG-rv	0.96	6542.71
	region	OCN	COO-rv	1.955	6694								region	EAF	COG-rv	0.96	6542.71
	region	OCN	COO-rv	1.955	6698.13								region	EAF	COG-rv	0.96	6542.86
	region	PAS	COO-rv	1.955	6698.13								region	IND	COG-rv	0.96	6542.86
	region	PAS	COO-rv	1.955	6709.67								region	IND	COG-rv	0.96	6549.55
	region	LAC	COO-rv	1.955	6709.67								region	OSA	COG-rv	0.96	6549.55
	region	LAC	COO-rv	1.955	6793.47								region	OSA	COG-rv	0.96	6552.02
	region	USA	COO-rs	1.955	6793.47								region	JPN	COG-rv	0.96	6552.02
	region	USA	COO-rs	1.955	6806.94								region	JPN	COG-rv	0.96	6552.07
	region	WCA	COO-rs	1.955	6806.94								region	PAS	COG-rv	0.96	6552.07
	region	WCA	COO-rs	1.955	6880.41								region	PAS	COG-rv	0.96	6574.57
	region	SAF	COO-rs	1.955	6880.41								region	LAC	COG-rv	0.96	6574.57
	region	SAF	COO-rs	1.955	6892.57								region	LAC	COG-rv	0.96	6586.53
	region	MEE	COO-rs	1.955	6892.57								region	USA	COG-rs	0.96	6586.53
	region	MEE	COO-rs	1.955	7140.98								region	USA	COG-rs	0.96	6685.64
	region	PAS	COO-rs	1.955	7140.98								region	CAN	COG-rs	0.96	6685.64
	region	PAS	COO-rs	1.955	7146.53								region	CAN	COG-rs	0.96	6690.33
	region	LAC	COO-rs	1.955	7146.53								region	WEU	COG-rs	0.96	6690.33
	region	LAC	COO-rs	1.955	7177.33								region	WEU	COG-rs	0.96	6729.45
	region	USA	COO-rv	2.1925	7177.33								region	EEU	COG-rs	0.96	6729.45
	region	USA	COO-rv	2.1925	7210.54								region	EEU	COG-rs	0.96	6730.12
	region	CAN	COO-rv	2.1925	7210.54								region	FSU	COG-rs	0.96	6730.12
	region	CAN	COO-rv	2.1925	7212.2								region	FSU	COG-rs	0.96	7252.49
	region	EEU	COO-rv	2.1925	7212.2								region	WCA	COG-rs	0.96	7252.49
	region	EEU	COO-rv	2.1925	7212.41								region	WCA	COG-rs	0.96	7279.92
	region	FSU	COO-rv	2.1925	7212.41								region	SAF	COG-rs	0.96	7279.92
	region	FSU	COO-rv	2.1925	7377.7								region	SAF	COG-rs	0.96	7287.01
	region	NAF	COO-rv	2.1925	7377.7								region	MEE	COG-rs	0.96	7287.01
	region	NAF	COO-rv	2.1925	7463.6								region	MEE	COG-rs	0.96	7471.55
	region	EAF	COO-rv	2.1925	7463.6								region	CHN	COG-rs	0.96	7471.55
	region	EAF	COO-rv	2.1925	7464.48								region	CHN	COG-rs	0.96	7510.3
	region	WCA	COO-rv	2.1925	7464.48								region	OEA	COG-rs	0.96	7510.3
	region	WCA	COO-rv	2.1925	7481.74								region	OEA	COG-rs	0.96	7516.58
	region	SAF	COO-rv	2.1925	7481.74								region	IND	COG-rs	0.96	7516.58
	region	SAF	COO-rv	2.1925	7496.14								region	IND	COG-rs	0.96	7519.02
	region	CHN	COO-rv	2.1925	7496.14								region	OSA	COG-rs	0.96	7519.02
	region	CHN	COO-rv	2.1925	7497.89								region	OSA	COG-rs	0.96	7528.96
	region	OEA	COO-rv	2.1925	7497.89								region	OCN	COG-rs	0.96	7528.96
	region	OEA	COO-rv	2.1925	7498.44								region	OCN	COG-rs	0.96	7541.33
	region	IND	COO-rv	2.1925	7498.44								region	PAS	COG-rs	0.96	7541.33
	region	IND	COO-rv	2.1925	7502.62								region	PAS	COG-rs	0.96	7576.12
	region	OSA	COO-rv	2.1925	7502.62								region	LAC	COG-rs	0.96	7576.12
	region	OSA	COO-rv	2.1925	7502.88								region	LAC	COG-rs	0.96	7617.17
	region	OCN	COO-rv	2.1925	7502.88								region	USA	COG-rv	1.0675	7617.17
	region	OCN	COO-rv	2.1925	7507								region	USA	COG-rv	1.0675	7629.43
	region	PAS	COO-rv	2.1925	7507								region	CAN	COG-rv	1.0675	7629.43
	region	PAS	COO-rv	2.1925	7518.54								region	CAN	COG-rv	1.0675	7634.88
	region	LAC	COO-rv	2.1925	7518.54								region	WEU	COG-rv	1.0675	7634.88
	region	LAC	COO-rv	2.1925	7602.34								region	WEU	COG-rv	1.0675	7634.88
	region	USA	COO-rs	2.1925	7602.34								region	EEU	COG-rv	1.0675	7634.88
	region	USA	COO-rs	2.1925	7615.81								region	EEU	COG-rv	1.0675	7637.61
	region	WCA	COO-rs	2.1925	7615.81								region	FSU	COG-rv	1.0675	7637.61
	region	WCA	COO-rs	2.1925	7689.28								region	FSU	COG-rv	1.0675	7827.59
	region	SAF	COO-rs	2.1925	7689.28								region	NAF	COG-rv	1.0675	7827.59
	region	SAF	COO-rs	2.1925	7701.44								region	NAF	COG-rv	1.0675	7875.94
	region	MEE	COO-rs	2.1925	7701.44								region	EAF	COG-rv	1.0675	7875.94
	region	MEE	COO-rs	2.1925	7949.86								region	EAF	COG-rv	1.0675	7876.1
	region	PAS	COO-rs	2.1925	7949.86								region	IND	COG-rv	1.0675	7876.1
	region	PAS	COO-rs	2.1925	7955.4								region	IND	COG-rv	1.0675	7882.79
	region	LAC	COO-rs	2.1925	7955.4								region	OSA	COG-rv	1.0675	7882.79
	region	LAC	COO-rs	2.1925	7986.21								region	OSA	COG-rv	1.0675	7885.25
	region	CAN	COO-rv	2.43	7986.21								region	JPN	COG-rv	1.0675	7885.25
	region	CAN	COO-rv	2.43	7991.54								region	JPN	COG-rv	1.0675	7885.3
	region	WEU	COO-rv	2.43	7991.54								region	PAS	COG-rv	1.0675	7885.3
	region	WEU	COO-rv	2.43	8013.54								region	PAS	COG-rv	1.0675	7907.8
	region	EEU	COO-rv	2.43	8013.54								region	LAC	COG-rv	1.0675	7907.8
	region	EEU	COO-rv	2.43	8014.84								region	LAC	COG-rv	1.0675	7919.76
	region	FSU	COO-rv	2.43	8014.84								region	USA	COG-rs	1.0675	7919.76
	region	FSU	COO-rv	2.43	8033.3								region	USA	COG-rs	1.0675	8018.88
	region	NAF	COO-rv	2.43	8033.3								region	CAN	COG-rs	1.0675	8018.88
	region	NAF	COO-rv	2.43	8036.51								region	CAN	COG-rs	1.0675	8023.56
	region	EAF	COO-rv	2.43	8036.51								region	WEU	COG-rs	1.0675	8023.56
	region	EAF	COO-rv	2.43	8036.54								region	WEU	COG-rs	1.0675	8062.69
	region	CHN	COO-rv	2.43	8036.54								region	EEU	COG-rs	1.0675	8062.69
	region	CHN	COO-rv	2.43	8055.79								region	EEU	COG-rs	1.0675	8063.35
	region	OEA	COO-rv	2.43	8055.79								region	FSU	COG-rs	1.0675	8063.35
	region	OEA	COO-rv	2.43	8061.75								region	FSU	COG-rs	1.0675	8585.73
	region	IND	COO-rv	2.43	8061.75								region	WCA	COG-rs	1.0675	8585.73
	region	IND	COO-rv	2.43	8065.21								region	WCA	COG-rs	1.0675	8613.16
	region	OSA	COO-rv	2.43	8065.21								region	SAF	COG-rs	1.0675	8613.16
	region	OSA	COO-rv	2.43	8065.42								region	SAF	COG-rs	1.0675	8620.24
	region	OCN	COO-rv	2.43	8065.42								region	MEE	COG-rs	1.0675	8620.24
	region	OCN	COO-rv	2.43	8066.65								region	MEE	COG-rs	1.0675	8804.78
	region	USA	COO-rs	2.43	8066.65								region	CHN	COG-rs	1.0675	8804.78
	region	USA	COO-rs	2.43	8150.49								region	CHN	COG-rs	1.0675	8843.53
	region	CAN	COO-rs	2.43	8150.49								region	OEA	COG-rs	1.0675	8843.53
	region	CAN	COO-rs	2.43	8153.01								region	OEA	COG-rs	1.0675	8849.82
	region	WEU	COO-rs	2.43	8153.01								region	IND	COG-rs	1.0675	8849.82
	region	WEU	COO-rs	2.43	8195.28								region	IND	COG-rs	1.0675	8852.26
	region	EEU	COO-rs	2.43	8195.28								region	OSA	COG-rs	1.0675	8852.26
	region	EEU	COO-rs	2.43	8195.83								region	OSA	COG-rs	1.0675	8862.19
	region	FSU	COO-rs	2.43	8195.83								region	OCN	COG-rs	1.0675	8862.19
	region	FSU	COO-rs	2.43	8521.83								region	OCN	COG-rs	1.0675	8874.56
	region	NAF	COO-rs	2.43	8521.83								region	PAS	COG-rs	1.0675	8874.56
	region	NAF	COO-rs	2.43	8589.41								region	PAS	COG-rs	1.0675	8909.35
	region	EAF	COO-rs	2.43	8589.41								region	LAC	COG-rs	1.0675	8909.35
	region	EAF	COO-rs	2.43	8595.06								region	LAC	COG-rs	1.0675	8950.41
	region	WCA	COO-rs	2.43	8595.06								region	USA	COG-rv	1.175	8950.41
	region	WCA	COO-rs	2.43	8607.83								region	USA	COG-rv	1.175	8962.67
	region	SAF	COO-rs	2.43	8607.83								region	CAN	COG-rv	1.175	8962.67
	region	SAF	COO-rs	2.43	8631.99								region	CAN	COG-rv	1.175	8968.11
	region	MEE	COO-rs	2.43	8631.99								region	WEU	COG-rv	1.175	8968.11
	region	MEE	COO-rs	2.43	8731.36								region	WEU	COG-rv	1.175	8968.11
	region	CHN	COO-rs	2.43	8731.36								region	EEU	COG-rv	1.175	8968.11
	region	CHN	COO-rs	2.43	8743.56								region	EEU	COG-rv	1.175	8970.85
	region	OEA	COO-rs	2.43	8743.56								region	FSU	COG-rv	1.175	8970.85
	region	OEA	COO-rs	2.43	8745.63								region	FSU	COG-rv	1.175	9160.83
	region	IND	COO-rs	2.43	8745.63								region	NAF	COG-rv	1.175	9160.83
	region	IND	COO-rs	2.43	8756.32								region	NAF	COG-rv	1.175	9209.18
	region	OSA	COO-rs	2.43	8756.32								region	EAF	COG-rv	1.175	9209.18
	region	OSA	COO-rs	2.43	8759.98								region	EAF	COG-rv	1.175	9209.33
	region	OCN	COO-rs	2.43	8759.98								region	IND	COG-rv	1.175	9209.33
	region	OCN	COO-rs	2.43	8779.93								region	IND	COG-rv	1.175	9216.03
	region	PAS	COO-rs	2.43	8779.93								region	OSA	COG-rv	1.175	9216.03
	region	PAS	COO-rs	2.43	8806.16								region	OSA	COG-rv	1.175	9218.49
	region	LAC	COO-rs	2.43	8806.16								region	JPN	COG-rv	1.175	9218.49
	region	LAC	COO-rs	2.43	9036.32								region	JPN	COG-rv	1.175	9218.54
	region	ARC	COO-rs	2.43	9036.32								region	PAS	COG-rv	1.175	9218.54
	region	ARC	COO-rs	2.43	9084.31								region	PAS	COG-rv	1.175	9241.04
	region	CAN	COO-rv	2.6975	9084.31								region	LAC	COG-rv	1.175	9241.04
	region	CAN	COO-rv	2.6975	9089.64								region	LAC	COG-rv	1.175	9253
	region	WEU	COO-rv	2.6975	9089.64								region	USA	COG-rs	1.175	9253
	region	WEU	COO-rv	2.6975	9111.64								region	USA	COG-rs	1.175	9352.11
	region	EEU	COO-rv	2.6975	9111.64								region	CAN	COG-rs	1.175	9352.11
	region	EEU	COO-rv	2.6975	9112.94								region	CAN	COG-rs	1.175	9356.8
	region	FSU	COO-rv	2.6975	9112.94								region	WEU	COG-rs	1.175	9356.8
	region	FSU	COO-rv	2.6975	9131.4								region	WEU	COG-rs	1.175	9395.92
	region	NAF	COO-rv	2.6975	9131.4								region	EEU	COG-rs	1.175	9395.92
	region	NAF	COO-rv	2.6975	9134.61								region	EEU	COG-rs	1.175	9396.59
	region	EAF	COO-rv	2.6975	9134.61								region	FSU	COG-rs	1.175	9396.59
	region	EAF	COO-rv	2.6975	9134.64								region	FSU	COG-rs	1.175	9918.96
	region	CHN	COO-rv	2.6975	9134.64								region	WCA	COG-rs	1.175	9918.96
	region	CHN	COO-rv	2.6975	9153.89								region	WCA	COG-rs	1.175	9946.39
	region	OEA	COO-rv	2.6975	9153.89								region	SAF	COG-rs	1.175	9946.39
	region	OEA	COO-rv	2.6975	9159.85								region	SAF	COG-rs	1.175	9953.48
	region	IND	COO-rv	2.6975	9159.85								region	MEE	COG-rs	1.175	9953.48
	region	IND	COO-rv	2.6975	9163.31								region	MEE	COG-rs	1.175	10138
	region	OSA	COO-rv	2.6975	9163.31								region	CHN	COG-rs	1.175	10138
	region	OSA	COO-rv	2.6975	9163.52								region	CHN	COG-rs	1.175	10176.8
	region	OCN	COO-rv	2.6975	9163.52								region	OEA	COG-rs	1.175	10176.8
	region	OCN	COO-rv	2.6975	9164.75								region	OEA	COG-rs	1.175	10183.1
	region	USA	COO-rs	2.6975	9164.75								region	IND	COG-rs	1.175	10183.1
	region	USA	COO-rs	2.6975	9248.58								region	IND	COG-rs	1.175	10185.5
	region	CAN	COO-rs	2.6975	9248.58								region	OSA	COG-rs	1.175	10185.5
	region	CAN	COO-rs	2.6975	9251.11								region	OSA	COG-rs	1.175	10195.4
	region	WEU	COO-rs	2.6975	9251.11								region	OCN	COG-rs	1.175	10195.4
	region	WEU	COO-rs	2.6975	9293.38								region	OCN	COG-rs	1.175	10207.8
	region	EEU	COO-rs	2.6975	9293.38								region	PAS	COG-rs	1.175	10207.8
	region	EEU	COO-rs	2.6975	9293.93								region	PAS	COG-rs	1.175	10242.6
	region	FSU	COO-rs	2.6975	9293.93								region	LAC	COG-rs	1.175	10242.6
	region	FSU	COO-rs	2.6975	9619.93								region	LAC	COG-rs	1.175	10283.6
	region	NAF	COO-rs	2.6975	9619.93								region	USA	COG-rv	1.2825	10283.6
	region	NAF	COO-rs	2.6975	9687.51								region	USA	COG-rv	1.2825	10295.9
	region	EAF	COO-rs	2.6975	9687.51								region	CAN	COG-rv	1.2825	10295.9
	region	EAF	COO-rs	2.6975	9693.16								region	CAN	COG-rv	1.2825	10301.3
	region	WCA	COO-rs	2.6975	9693.16								region	WEU	COG-rv	1.2825	10301.3
	region	WCA	COO-rs	2.6975	9705.93								region	WEU	COG-rv	1.2825	10301.3
	region	SAF	COO-rs	2.6975	9705.93								region	EEU	COG-rv	1.2825	10301.3
	region	SAF	COO-rs	2.6975	9730.09								region	EEU	COG-rv	1.2825	10304.1
	region	MEE	COO-rs	2.6975	9730.09								region	FSU	COG-rv	1.2825	10304.1
	region	MEE	COO-rs	2.6975	9829.46								region	FSU	COG-rv	1.2825	10494.1
	region	CHN	COO-rs	2.6975	9829.46								region	NAF	COG-rv	1.2825	10494.1
	region	CHN	COO-rs	2.6975	9841.66								region	NAF	COG-rv	1.2825	10542.4
	region	OEA	COO-rs	2.6975	9841.66								region	EAF	COG-rv	1.2825	10542.4
	region	OEA	COO-rs	2.6975	9843.73								region	EAF	COG-rv	1.2825	10542.6
	region	IND	COO-rs	2.6975	9843.73								region	IND	COG-rv	1.2825	10542.6
	region	IND	COO-rs	2.6975	9854.42								region	IND	COG-rv	1.2825	10549.3
	region	OSA	COO-rs	2.6975	9854.42								region	OSA	COG-rv	1.2825	10549.3
	region	OSA	COO-rs	2.6975	9858.08								region	OSA	COG-rv	1.2825	10551.7
	region	OCN	COO-rs	2.6975	9858.08								region	JPN	COG-rv	1.2825	10551.7
	region	OCN	COO-rs	2.6975	9878.02								region	JPN	COG-rv	1.2825	10551.8
	region	PAS	COO-rs	2.6975	9878.02								region	PAS	COG-rv	1.2825	10551.8
	region	PAS	COO-rs	2.6975	9904.26								region	PAS	COG-rv	1.2825	10574.3
	region	LAC	COO-rs	2.6975	9904.26								region	LAC	COG-rv	1.2825	10574.3
	region	LAC	COO-rs	2.6975	10134.4								region	LAC	COG-rv	1.2825	10586.2
	region	ARC	COO-rs	2.6975	10134.4								region	USA	COG-rs	1.2825	10586.2
	region	ARC	COO-rs	2.6975	10182.4								region	USA	COG-rs	1.2825	10685.4
	region	CAN	COO-rv	2.965	10182.4								region	CAN	COG-rs	1.2825	10685.4
	region	CAN	COO-rv	2.965	10187.7								region	CAN	COG-rs	1.2825	10690
	region	WEU	COO-rv	2.965	10187.7								region	WEU	COG-rs	1.2825	10690
	region	WEU	COO-rv	2.965	10209.7								region	WEU	COG-rs	1.2825	10729.2
	region	EEU	COO-rv	2.965	10209.7								region	EEU	COG-rs	1.2825	10729.2
	region	EEU	COO-rv	2.965	10211								region	EEU	COG-rs	1.2825	10729.8
	region	FSU	COO-rv	2.965	10211								region	FSU	COG-rs	1.2825	10729.8
	region	FSU	COO-rv	2.965	10229.5								region	FSU	COG-rs	1.2825	11252.2
	region	NAF	COO-rv	2.965	10229.5								region	WCA	COG-rs	1.2825	11252.2
	region	NAF	COO-rv	2.965	10232.7								region	WCA	COG-rs	1.2825	11279.6
	region	EAF	COO-rv	2.965	10232.7								region	SAF	COG-rs	1.2825	11279.6
	region	EAF	COO-rv	2.965	10232.7								region	SAF	COG-rs	1.2825	11286.7
	region	CHN	COO-rv	2.965	10232.7								region	MEE	COG-rs	1.2825	11286.7
	region	CHN	COO-rv	2.965	10252								region	MEE	COG-rs	1.2825	11471.3
	region	OEA	COO-rv	2.965	10252								region	CHN	COG-rs	1.2825	11471.3
	region	OEA	COO-rv	2.965	10257.9								region	CHN	COG-rs	1.2825	11510
	region	IND	COO-rv	2.965	10257.9								region	OEA	COG-rs	1.2825	11510
	region	IND	COO-rv	2.965	10261.4								region	OEA	COG-rs	1.2825	11516.3
	region	OSA	COO-rv	2.965	10261.4								region	IND	COG-rs	1.2825	11516.3
	region	OSA	COO-rv	2.965	10261.6								region	IND	COG-rs	1.2825	11518.7
	region	OCN	COO-rv	2.965	10261.6								region	OSA	COG-rs	1.2825	11518.7
	region	OCN	COO-rv	2.965	10262.9								region	OSA	COG-rs	1.2825	11528.7
	region	USA	COO-rs	2.965	10262.9								region	OCN	COG-rs	1.2825	11528.7
	region	USA	COO-rs	2.965	10346.7								region	OCN	COG-rs	1.2825	11541
	region	CAN	COO-rs	2.965	10346.7								region	PAS	COG-rs	1.2825	11541
	region	CAN	COO-rs	2.965	10349.2								region	PAS	COG-rs	1.2825	11575.8
	region	WEU	COO-rs	2.965	10349.2								region	LAC	COG-rs	1.2825	11575.8
	region	WEU	COO-rs	2.965	10391.5								region	LAC	COG-rs	1.2825	11616.9
	region	EEU	COO-rs	2.965	10391.5								region	NAF	COG-rv	1.39	11616.9
	region	EEU	COO-rs	2.965	10392								region	NAF	COG-rv	1.39	11625.3
	region	FSU	COO-rs	2.965	10392								region	EAF	COG-rv	1.39	11625.3
	region	FSU	COO-rs	2.965	10718								region	EAF	COG-rv	1.39	11625.3
	region	NAF	COO-rs	2.965	10718								region	USA	COG-rs	1.39	11625.3
	region	NAF	COO-rs	2.965	10785.6								region	USA	COG-rs	1.39	11686.7
	region	EAF	COO-rs	2.965	10785.6								region	CAN	COG-rs	1.39	11686.7
	region	EAF	COO-rs	2.965	10791.3								region	CAN	COG-rs	1.39	11716.7
	region	WCA	COO-rs	2.965	10791.3								region	WEU	COG-rs	1.39	11716.7
	region	WCA	COO-rs	2.965	10804								region	WEU	COG-rs	1.39	11736.3
	region	SAF	COO-rs	2.965	10804								region	EEU	COG-rs	1.39	11736.3
	region	SAF	COO-rs	2.965	10828.2								region	EEU	COG-rs	1.39	11738.9
	region	MEE	COO-rs	2.965	10828.2								region	FSU	COG-rs	1.39	11738.9
	region	MEE	COO-rs	2.965	10927.6								region	FSU	COG-rs	1.39	12075.3
	region	CHN	COO-rs	2.965	10927.6								region	NAF	COG-rs	1.39	12075.3
	region	CHN	COO-rs	2.965	10939.8								region	NAF	COG-rs	1.39	12131.5
	region	OEA	COO-rs	2.965	10939.8								region	EAF	COG-rs	1.39	12131.5
	region	OEA	COO-rs	2.965	10941.8								region	EAF	COG-rs	1.39	12135.3
	region	IND	COO-rs	2.965	10941.8								region	WCA	COG-rs	1.39	12135.3
	region	IND	COO-rs	2.965	10952.5								region	WCA	COG-rs	1.39	12142.2
	region	OSA	COO-rs	2.965	10952.5								region	SAF	COG-rs	1.39	12142.2
	region	OSA	COO-rs	2.965	10956.2								region	SAF	COG-rs	1.39	12145.5
	region	OCN	COO-rs	2.965	10956.2								region	MEE	COG-rs	1.39	12145.5
	region	OCN	COO-rs	2.965	10976.1								region	MEE	COG-rs	1.39	12219.3
	region	PAS	COO-rs	2.965	10976.1								region	CHN	COG-rs	1.39	12219.3
	region	PAS	COO-rs	2.965	11002.4								region	CHN	COG-rs	1.39	12238.7
	region	LAC	COO-rs	2.965	11002.4								region	OEA	COG-rs	1.39	12238.7
	region	LAC	COO-rs	2.965	11232.5								region	OEA	COG-rs	1.39	12241.8
	region	ARC	COO-rs	2.965	11232.5								region	IND	COG-rs	1.39	12241.8
	region	ARC	COO-rs	2.965	11280.5								region	IND	COG-rs	1.39	12245.4
	region	CAN	COO-rv	3.2325	11280.5								region	OSA	COG-rs	1.39	12245.4
	region	CAN	COO-rv	3.2325	11285.8								region	OSA	COG-rs	1.39	12252.8
	region	WEU	COO-rv	3.2325	11285.8								region	OCN	COG-rs	1.39	12252.8
	region	WEU	COO-rv	3.2325	11307.8								region	OCN	COG-rs	1.39	12256.9
	region	EEU	COO-rv	3.2325	11307.8								region	PAS	COG-rs	1.39	12256.9
	region	EEU	COO-rv	3.2325	11309.1								region	PAS	COG-rs	1.39	12291.3
	region	FSU	COO-rv	3.2325	11309.1								region	LAC	COG-rs	1.39	12291.3
	region	FSU	COO-rv	3.2325	11327.6								region	LAC	COG-rs	1.39	12328.4
	region	NAF	COO-rv	3.2325	11327.6								region	ARC	COG-rs	1.39	12328.4
	region	NAF	COO-rv	3.2325	11330.8								region	ARC	COG-rs	1.39	12437.7
	region	EAF	COO-rv	3.2325	11330.8								region	NAF	COG-rv	1.6675	12437.7
	region	EAF	COO-rv	3.2325	11330.8								region	NAF	COG-rv	1.6675	12446.1
	region	CHN	COO-rv	3.2325	11330.8								region	EAF	COG-rv	1.6675	12446.1
	region	CHN	COO-rv	3.2325	11350.1								region	EAF	COG-rv	1.6675	12446.2
	region	OEA	COO-rv	3.2325	11350.1								region	USA	COG-rs	1.6675	12446.2
	region	OEA	COO-rv	3.2325	11356								region	USA	COG-rs	1.6675	12507.5
	region	IND	COO-rv	3.2325	11356								region	CAN	COG-rs	1.6675	12507.5
	region	IND	COO-rv	3.2325	11359.5								region	CAN	COG-rs	1.6675	12537.5
	region	OSA	COO-rv	3.2325	11359.5								region	WEU	COG-rs	1.6675	12537.5
	region	OSA	COO-rv	3.2325	11359.7								region	WEU	COG-rs	1.6675	12557.1
	region	OCN	COO-rv	3.2325	11359.7								region	EEU	COG-rs	1.6675	12557.1
	region	OCN	COO-rv	3.2325	11361								region	EEU	COG-rs	1.6675	12559.7
	region	USA	COO-rs	3.2325	11361								region	FSU	COG-rs	1.6675	12559.7
	region	USA	COO-rs	3.2325	11444.8								region	FSU	COG-rs	1.6675	12896.1
	region	CAN	COO-rs	3.2325	11444.8								region	NAF	COG-rs	1.6675	12896.1
	region	CAN	COO-rs	3.2325	11447.3								region	NAF	COG-rs	1.6675	12952.3
	region	WEU	COO-rs	3.2325	11447.3								region	EAF	COG-rs	1.6675	12952.3
	region	WEU	COO-rs	3.2325	11489.6								region	EAF	COG-rs	1.6675	12956.1
	region	EEU	COO-rs	3.2325	11489.6								region	WCA	COG-rs	1.6675	12956.1
	region	EEU	COO-rs	3.2325	11490.1								region	WCA	COG-rs	1.6675	12963
	region	FSU	COO-rs	3.2325	11490.1								region	SAF	COG-rs	1.6675	12963
	region	FSU	COO-rs	3.2325	11816.1								region	SAF	COG-rs	1.6675	12966.3
	region	NAF	COO-rs	3.2325	11816.1								region	MEE	COG-rs	1.6675	12966.3
	region	NAF	COO-rs	3.2325	11883.7								region	MEE	COG-rs	1.6675	13040.1
	region	EAF	COO-rs	3.2325	11883.7								region	CHN	COG-rs	1.6675	13040.1
	region	EAF	COO-rs	3.2325	11889.4								region	CHN	COG-rs	1.6675	13059.5
	region	WCA	COO-rs	3.2325	11889.4								region	OEA	COG-rs	1.6675	13059.5
	region	WCA	COO-rs	3.2325	11902.1								region	OEA	COG-rs	1.6675	13062.6
	region	SAF	COO-rs	3.2325	11902.1								region	IND	COG-rs	1.6675	13062.6
	region	SAF	COO-rs	3.2325	11926.3								region	IND	COG-rs	1.6675	13066.3
	region	MEE	COO-rs	3.2325	11926.3								region	OSA	COG-rs	1.6675	13066.3
	region	MEE	COO-rs	3.2325	12025.7								region	OSA	COG-rs	1.6675	13073.6
	region	CHN	COO-rs	3.2325	12025.7								region	OCN	COG-rs	1.6675	13073.6
	region	CHN	COO-rs	3.2325	12037.9								region	OCN	COG-rs	1.6675	13077.8
	region	OEA	COO-rs	3.2325	12037.9								region	PAS	COG-rs	1.6675	13077.8
	region	OEA	COO-rs	3.2325	12039.9								region	PAS	COG-rs	1.6675	13112.1
	region	IND	COO-rs	3.2325	12039.9								region	LAC	COG-rs	1.6675	13112.1
	region	IND	COO-rs	3.2325	12050.6								region	LAC	COG-rs	1.6675	13149.3
	region	OSA	COO-rs	3.2325	12050.6								region	ARC	COG-rs	1.6675	13149.3
	region	OSA	COO-rs	3.2325	12054.3								region	ARC	COG-rs	1.6675	13258.5
	region	OCN	COO-rs	3.2325	12054.3								region	NAF	COG-rv	1.945	13258.5
	region	OCN	COO-rs	3.2325	12074.2								region	NAF	COG-rv	1.945	13267
	region	PAS	COO-rs	3.2325	12074.2								region	EAF	COG-rv	1.945	13267
	region	PAS	COO-rs	3.2325	12100.5								region	EAF	COG-rv	1.945	13267
	region	LAC	COO-rs	3.2325	12100.5								region	USA	COG-rs	1.945	13267
	region	LAC	COO-rs	3.2325	12330.6								region	USA	COG-rs	1.945	13328.3
	region	ARC	COO-rs	3.2325	12330.6								region	CAN	COG-rs	1.945	13328.3
	region	ARC	COO-rs	3.2325	12378.6								region	CAN	COG-rs	1.945	13358.4
	region	USA	COO-rs	3.5	12378.6								region	WEU	COG-rs	1.945	13358.4
	region	USA	COO-rs	3.5	12415.9								region	WEU	COG-rs	1.945	13377.9
	region	CAN	COO-rs	3.5	12415.9								region	EEU	COG-rs	1.945	13377.9
	region	CAN	COO-rs	3.5	12463.8								region	EEU	COG-rs	1.945	13380.5
	region	WEU	COO-rs	3.5	12463.8								region	FSU	COG-rs	1.945	13380.5
	region	WEU	COO-rs	3.5	12514.6								region	FSU	COG-rs	1.945	13716.9
	region	EEU	COO-rs	3.5	12514.6								region	NAF	COG-rs	1.945	13716.9
	region	EEU	COO-rs	3.5	12518.4								region	NAF	COG-rs	1.945	13773.1
	region	FSU	COO-rs	3.5	12518.4								region	EAF	COG-rs	1.945	13773.1
	region	FSU	COO-rs	3.5	12658.2								region	EAF	COG-rs	1.945	13777
	region	NAF	COO-rs	3.5	12658.2								region	WCA	COG-rs	1.945	13777
	region	NAF	COO-rs	3.5	12668.3								region	WCA	COG-rs	1.945	13783.8
	region	EAF	COO-rs	3.5	12668.3								region	SAF	COG-rs	1.945	13783.8
	region	EAF	COO-rs	3.5	12669.1								region	SAF	COG-rs	1.945	13787.1
	region	WCA	COO-rs	3.5	12669.1								region	MEE	COG-rs	1.945	13787.1
	region	WCA	COO-rs	3.5	12675.5								region	MEE	COG-rs	1.945	13860.9
	region	SAF	COO-rs	3.5	12675.5								region	CHN	COG-rs	1.945	13860.9
	region	SAF	COO-rs	3.5	12677.9								region	CHN	COG-rs	1.945	13880.3
	region	CHN	COO-rs	3.5	12677.9								region	OEA	COG-rs	1.945	13880.3
	region	CHN	COO-rs	3.5	12714.2								region	OEA	COG-rs	1.945	13883.5
	region	OEA	COO-rs	3.5	12714.2								region	IND	COG-rs	1.945	13883.5
	region	OEA	COO-rs	3.5	12720.4								region	IND	COG-rs	1.945	13887.1
	region	IND	COO-rs	3.5	12720.4								region	OSA	COG-rs	1.945	13887.1
	region	IND	COO-rs	3.5	12722.4								region	OSA	COG-rs	1.945	13894.5
	region	OSA	COO-rs	3.5	12722.4								region	OCN	COG-rs	1.945	13894.5
	region	OSA	COO-rs	3.5	12723.1								region	OCN	COG-rs	1.945	13898.6
	region	OCN	COO-rs	3.5	12723.1								region	PAS	COG-rs	1.945	13898.6
	region	OCN	COO-rs	3.5	12725.2								region	PAS	COG-rs	1.945	13932.9
	region	PAS	COO-rs	3.5	12725.2								region	LAC	COG-rs	1.945	13932.9
	region	PAS	COO-rs	3.5	12728.8								region	LAC	COG-rs	1.945	13970.1
	region	LAC	COO-rs	3.5	12728.8								region	ARC	COG-rs	1.945	13970.1
	region	LAC	COO-rs	3.5	12774.8								region	ARC	COG-rs	1.945	14079.4
	region	ARC	COO-rs	3.5	12774.8								region	NAF	COG-rv	2.2225	14079.4
	region	ARC	COO-rs	3.5	12918.8								region	NAF	COG-rv	2.2225	14087.8
	region	USA	COO-rs	3.9275	12918.8								region	EAF	COG-rv	2.2225	14087.8
	region	USA	COO-rs	3.9275	12956								region	EAF	COG-rv	2.2225	14087.8
	region	CAN	COO-rs	3.9275	12956								region	USA	COG-rs	2.2225	14087.8
	region	CAN	COO-rs	3.9275	13004								region	USA	COG-rs	2.2225	14149.2
	region	WEU	COO-rs	3.9275	13004								region	CAN	COG-rs	2.2225	14149.2
	region	WEU	COO-rs	3.9275	13054.7								region	CAN	COG-rs	2.2225	14179.2
	region	EEU	COO-rs	3.9275	13054.7								region	WEU	COG-rs	2.2225	14179.2
	region	EEU	COO-rs	3.9275	13058.6								region	WEU	COG-rs	2.2225	14198.7
	region	FSU	COO-rs	3.9275	13058.6								region	EEU	COG-rs	2.2225	14198.7
	region	FSU	COO-rs	3.9275	13198.4								region	EEU	COG-rs	2.2225	14201.4
	region	NAF	COO-rs	3.9275	13198.4								region	FSU	COG-rs	2.2225	14201.4
	region	NAF	COO-rs	3.9275	13208.5								region	FSU	COG-rs	2.2225	14537.7
	region	EAF	COO-rs	3.9275	13208.5								region	NAF	COG-rs	2.2225	14537.7
	region	EAF	COO-rs	3.9275	13209.3								region	NAF	COG-rs	2.2225	14594
	region	WCA	COO-rs	3.9275	13209.3								region	EAF	COG-rs	2.2225	14594
	region	WCA	COO-rs	3.9275	13215.7								region	EAF	COG-rs	2.2225	14597.8
	region	SAF	COO-rs	3.9275	13215.7								region	WCA	COG-rs	2.2225	14597.8
	region	SAF	COO-rs	3.9275	13218.1								region	WCA	COG-rs	2.2225	14604.6
	region	CHN	COO-rs	3.9275	13218.1								region	SAF	COG-rs	2.2225	14604.6
	region	CHN	COO-rs	3.9275	13254.4								region	SAF	COG-rs	2.2225	14608
	region	OEA	COO-rs	3.9275	13254.4								region	MEE	COG-rs	2.2225	14608
	region	OEA	COO-rs	3.9275	13260.6								region	MEE	COG-rs	2.2225	14681.8
	region	IND	COO-rs	3.9275	13260.6								region	CHN	COG-rs	2.2225	14681.8
	region	IND	COO-rs	3.9275	13262.6								region	CHN	COG-rs	2.2225	14701.1
	region	OSA	COO-rs	3.9275	13262.6								region	OEA	COG-rs	2.2225	14701.1
	region	OSA	COO-rs	3.9275	13263.3								region	OEA	COG-rs	2.2225	14704.3
	region	OCN	COO-rs	3.9275	13263.3								region	IND	COG-rs	2.2225	14704.3
	region	OCN	COO-rs	3.9275	13265.4								region	IND	COG-rs	2.2225	14707.9
	region	PAS	COO-rs	3.9275	13265.4								region	OSA	COG-rs	2.2225	14707.9
	region	PAS	COO-rs	3.9275	13268.9								region	OSA	COG-rs	2.2225	14715.3
	region	LAC	COO-rs	3.9275	13268.9								region	OCN	COG-rs	2.2225	14715.3
	region	LAC	COO-rs	3.9275	13315								region	OCN	COG-rs	2.2225	14719.4
	region	ARC	COO-rs	3.9275	13315								region	PAS	COG-rs	2.2225	14719.4
	region	ARC	COO-rs	3.9275	13458.9								region	PAS	COG-rs	2.2225	14753.8
	region	USA	SHO-rv	3.94737	13458.9								region	LAC	COG-rs	2.2225	14753.8
	region	USA	SHO-rv	3.94737	13549.3								region	LAC	COG-rs	2.2225	14790.9
	region	WEU	SHO-rv	3.94737	13549.3								region	ARC	COG-rs	2.2225	14790.9
	region	WEU	SHO-rv	3.94737	13549.5								region	ARC	COG-rs	2.2225	14900.2
	region	EEU	SHO-rv	3.94737	13549.5								region	USA	COG-rs	2.5	14900.2
	region	EEU	SHO-rv	3.94737	13549.5								region	USA	COG-rs	2.5	14924.7
	region	FSU	SHO-rv	3.94737	13549.5								region	CAN	COG-rs	2.5	14924.7
	region	FSU	SHO-rv	3.94737	13550.3								region	CAN	COG-rs	2.5	14954.7
	region	NAF	SHO-rv	3.94737	13550.3								region	WEU	COG-rs	2.5	14954.7
	region	NAF	SHO-rv	3.94737	13550.9								region	WEU	COG-rs	2.5	14974.3
	region	MEE	SHO-rv	3.94737	13550.9								region	EEU	COG-rs	2.5	14974.3
	region	MEE	SHO-rv	3.94737	13564.6								region	EEU	COG-rs	2.5	14976.8
	region	CHN	SHO-rv	3.94737	13564.6								region	FSU	COG-rs	2.5	14976.8
	region	CHN	SHO-rv	3.94737	13565.4								region	FSU	COG-rs	2.5	15201
	region	OCN	SHO-rv	3.94737	13565.4								region	NAF	COG-rs	2.5	15201
	region	OCN	SHO-rv	3.94737	13566.5								region	NAF	COG-rs	2.5	15225.8
	region	PAS	SHO-rv	3.94737	13566.5								region	EAF	COG-rs	2.5	15225.8
	region	PAS	SHO-rv	3.94737	13567								region	EAF	COG-rs	2.5	15227.5
	region	LAC	SHO-rv	3.94737	13567								region	SAF	COG-rs	2.5	15227.5
	region	LAC	SHO-rv	3.94737	13567.5								region	SAF	COG-rs	2.5	15228.6
	region	USA	COO-rs	4.355	13567.5								region	CHN	COG-rs	2.5	15228.6
	region	USA	COO-rs	4.355	13604.7								region	CHN	COG-rs	2.5	15248
	region	CAN	COO-rs	4.355	13604.7								region	OEA	COG-rs	2.5	15248
	region	CAN	COO-rs	4.355	13652.7								region	OEA	COG-rs	2.5	15251.1
	region	WEU	COO-rs	4.355	13652.7								region	IND	COG-rs	2.5	15251.1
	region	WEU	COO-rs	4.355	13703.4								region	IND	COG-rs	2.5	15253.3
	region	EEU	COO-rs	4.355	13703.4								region	OSA	COG-rs	2.5	15253.3
	region	EEU	COO-rs	4.355	13707.3								region	OSA	COG-rs	2.5	15256.2
	region	FSU	COO-rs	4.355	13707.3								region	PAS	COG-rs	2.5	15256.2
	region	FSU	COO-rs	4.355	13847.1								region	PAS	COG-rs	2.5	15263.1
	region	NAF	COO-rs	4.355	13847.1								region	LAC	COG-rs	2.5	15263.1
	region	NAF	COO-rs	4.355	13857.2								region	LAC	COG-rs	2.5	15285.4
	region	EAF	COO-rs	4.355	13857.2								region	ARC	COG-rs	2.5	15285.4
	region	EAF	COO-rs	4.355	13858								region	ARC	COG-rs	2.5	15613.2
	region	WCA	COO-rs	4.355	13858								region	USA	COG-rs	2.745	15613.2
	region	WCA	COO-rs	4.355	13864.4								region	USA	COG-rs	2.745	15637.7
	region	SAF	COO-rs	4.355	13864.4								region	CAN	COG-rs	2.745	15637.7
	region	SAF	COO-rs	4.355	13866.8								region	CAN	COG-rs	2.745	15667.8
	region	CHN	COO-rs	4.355	13866.8								region	WEU	COG-rs	2.745	15667.8
	region	CHN	COO-rs	4.355	13903.1								region	WEU	COG-rs	2.745	15687.3
	region	OEA	COO-rs	4.355	13903.1								region	EEU	COG-rs	2.745	15687.3
	region	OEA	COO-rs	4.355	13909.2								region	EEU	COG-rs	2.745	15689.8
	region	IND	COO-rs	4.355	13909.2								region	FSU	COG-rs	2.745	15689.8
	region	IND	COO-rs	4.355	13911.3								region	FSU	COG-rs	2.745	15914.1
	region	OSA	COO-rs	4.355	13911.3								region	NAF	COG-rs	2.745	15914.1
	region	OSA	COO-rs	4.355	13912								region	NAF	COG-rs	2.745	15938.8
	region	OCN	COO-rs	4.355	13912								region	EAF	COG-rs	2.745	15938.8
	region	OCN	COO-rs	4.355	13914.1								region	EAF	COG-rs	2.745	15940.5
	region	PAS	COO-rs	4.355	13914.1								region	SAF	COG-rs	2.745	15940.5
	region	PAS	COO-rs	4.355	13917.6								region	SAF	COG-rs	2.745	15941.6
	region	LAC	COO-rs	4.355	13917.6								region	CHN	COG-rs	2.745	15941.6
	region	LAC	COO-rs	4.355	13963.7								region	CHN	COG-rs	2.745	15961
	region	ARC	COO-rs	4.355	13963.7								region	OEA	COG-rs	2.745	15961
	region	ARC	COO-rs	4.355	14107.6								region	OEA	COG-rs	2.745	15964.1
	region	USA	COO-rs	4.7825	14107.6								region	IND	COG-rs	2.745	15964.1
	region	USA	COO-rs	4.7825	14144.9								region	IND	COG-rs	2.745	15966.3
	region	CAN	COO-rs	4.7825	14144.9								region	OSA	COG-rs	2.745	15966.3
	region	CAN	COO-rs	4.7825	14192.9								region	OSA	COG-rs	2.745	15969.3
	region	WEU	COO-rs	4.7825	14192.9								region	PAS	COG-rs	2.745	15969.3
	region	WEU	COO-rs	4.7825	14243.6								region	PAS	COG-rs	2.745	15976.1
	region	EEU	COO-rs	4.7825	14243.6								region	LAC	COG-rs	2.745	15976.1
	region	EEU	COO-rs	4.7825	14247.4								region	LAC	COG-rs	2.745	15998.4
	region	FSU	COO-rs	4.7825	14247.4								region	ARC	COG-rs	2.745	15998.4
	region	FSU	COO-rs	4.7825	14387.2								region	ARC	COG-rs	2.745	16326.2
	region	NAF	COO-rs	4.7825	14387.2								region	USA	COG-rs	2.99	16326.2
	region	NAF	COO-rs	4.7825	14397.3								region	USA	COG-rs	2.99	16350.8
	region	EAF	COO-rs	4.7825	14397.3								region	CAN	COG-rs	2.99	16350.8
	region	EAF	COO-rs	4.7825	14398.2								region	CAN	COG-rs	2.99	16380.8
	region	WCA	COO-rs	4.7825	14398.2								region	WEU	COG-rs	2.99	16380.8
	region	WCA	COO-rs	4.7825	14404.5								region	WEU	COG-rs	2.99	16400.4
	region	SAF	COO-rs	4.7825	14404.5								region	EEU	COG-rs	2.99	16400.4
	region	SAF	COO-rs	4.7825	14407								region	EEU	COG-rs	2.99	16402.8
	region	CHN	COO-rs	4.7825	14407								region	FSU	COG-rs	2.99	16402.8
	region	CHN	COO-rs	4.7825	14443.3								region	FSU	COG-rs	2.99	16627.1
	region	OEA	COO-rs	4.7825	14443.3								region	NAF	COG-rs	2.99	16627.1
	region	OEA	COO-rs	4.7825	14449.4								region	NAF	COG-rs	2.99	16651.9
	region	IND	COO-rs	4.7825	14449.4								region	EAF	COG-rs	2.99	16651.9
	region	IND	COO-rs	4.7825	14451.5								region	EAF	COG-rs	2.99	16653.6
	region	OSA	COO-rs	4.7825	14451.5								region	SAF	COG-rs	2.99	16653.6
	region	OSA	COO-rs	4.7825	14452.2								region	SAF	COG-rs	2.99	16654.7
	region	OCN	COO-rs	4.7825	14452.2								region	CHN	COG-rs	2.99	16654.7
	region	OCN	COO-rs	4.7825	14454.2								region	CHN	COG-rs	2.99	16674
	region	PAS	COO-rs	4.7825	14454.2								region	OEA	COG-rs	2.99	16674
	region	PAS	COO-rs	4.7825	14457.8								region	OEA	COG-rs	2.99	16677.2
	region	LAC	COO-rs	4.7825	14457.8								region	IND	COG-rs	2.99	16677.2
	region	LAC	COO-rs	4.7825	14503.8								region	IND	COG-rs	2.99	16679.4
	region	ARC	COO-rs	4.7825	14503.8								region	OSA	COG-rs	2.99	16679.4
	region	ARC	COO-rs	4.7825	14647.8								region	OSA	COG-rs	2.99	16682.3
	region	USA	EHO-rv	5.25763	14647.8								region	PAS	COG-rs	2.99	16682.3
	region	USA	EHO-rv	5.25763	14652.2								region	PAS	COG-rs	2.99	16689.2
	region	CAN	EHO-rv	5.25763	14652.2								region	LAC	COG-rs	2.99	16689.2
	region	CAN	EHO-rv	5.25763	14652.2								region	LAC	COG-rs	2.99	16711.5
	region	WEU	EHO-rv	5.25763	14652.2								region	ARC	COG-rs	2.99	16711.5
	region	WEU	EHO-rv	5.25763	14652.2								region	ARC	COG-rs	2.99	17039.3
	region	EEU	EHO-rv	5.25763	14652.2								region	USA	CMG-rv	3	17039.3
	region	EEU	EHO-rv	5.25763	14652.2								region	USA	CMG-rv	3	17225.5
	region	FSU	EHO-rv	5.25763	14652.2								region	CAN	CMG-rv	3	17225.5
	region	FSU	EHO-rv	5.25763	14652.3								region	CAN	CMG-rv	3	17277.7
	region	NAF	EHO-rv	5.25763	14652.3								region	WEU	CMG-rv	3	17277.7
	region	NAF	EHO-rv	5.25763	14652.3								region	WEU	CMG-rv	3	17329.9
	region	MEE	EHO-rv	5.25763	14652.3								region	EEU	CMG-rv	3	17329.9
	region	MEE	EHO-rv	5.25763	14652.3								region	EEU	CMG-rv	3	17344.9
	region	CHN	EHO-rv	5.25763	14652.3								region	FSU	CMG-rv	3	17344.9
	region	CHN	EHO-rv	5.25763	14652.8								region	FSU	CMG-rv	3	17493.9
	region	LAC	EHO-rv	5.25763	14652.8								region	NAF	CMG-rv	3	17493.9
	region	LAC	EHO-rv	5.25763	14675								region	NAF	CMG-rv	3	17523.7
	region	CAN	TAO-rv	5.25763	14675								region	EAF	CMG-rv	3	17523.7
	region	CAN	TAO-rv	5.25763	14750.9								region	EAF	CMG-rv	3	17538.7
	region	WEU	TAO-rv	5.25763	14750.9								region	WCA	CMG-rv	3	17538.7
	region	WEU	TAO-rv	5.25763	14750.9								region	WCA	CMG-rv	3	17553.7
	region	FSU	TAO-rv	5.25763	14750.9								region	SAF	CMG-rv	3	17553.7
	region	FSU	TAO-rv	5.25763	14812.6								region	SAF	CMG-rv	3	17568.7
	region	WCA	TAO-rv	5.25763	14812.6								region	MEE	CMG-rv	3	17568.7
	region	WCA	TAO-rv	5.25763	14813								region	MEE	CMG-rv	3	17583.7
	region	SAF	TAO-rv	5.25763	14813								region	CHN	CMG-rv	3	17583.7
	region	SAF	TAO-rv	5.25763	14813.3								region	CHN	CMG-rv	3	17695.5
	region	PAS	TAO-rv	5.25763	14813.3								region	IND	CMG-rv	3	17695.5
	region	PAS	TAO-rv	5.25763	14813.5								region	IND	CMG-rv	3	17747.7
	region	USA	SHO-rv	5.26316	14813.5								region	OSA	CMG-rv	3	17747.7
	region	USA	SHO-rv	5.26316	14949								region	OSA	CMG-rv	3	17755.1
	region	WEU	SHO-rv	5.26316	14949								region	JPN	CMG-rv	3	17755.1
	region	WEU	SHO-rv	5.26316	14949.5								region	JPN	CMG-rv	3	17762.5
	region	EEU	SHO-rv	5.26316	14949.5								region	OCN	CMG-rv	3	17762.5
	region	EEU	SHO-rv	5.26316	14949.5								region	OCN	CMG-rv	3	17799.7
	region	FSU	SHO-rv	5.26316	14949.5								region	PAS	CMG-rv	3	17799.7
	region	FSU	SHO-rv	5.26316	14950.5								region	PAS	CMG-rv	3	17807.1
	region	NAF	SHO-rv	5.26316	14950.5								region	LAC	CMG-rv	3	17807.1
	region	NAF	SHO-rv	5.26316	14951.1								region	LAC	CMG-rv	3	17851.9
	region	MEE	SHO-rv	5.26316	14951.1								region	USA	TIG-rv	3	17851.9
	region	MEE	SHO-rv	5.26316	14954.8								region	USA	TIG-rv	3	18075.5
	region	CHN	SHO-rv	5.26316	14954.8								region	CAN	TIG-rv	3	18075.5
	region	CHN	SHO-rv	5.26316	14955.6								region	CAN	TIG-rv	3	18187.3
	region	OCN	SHO-rv	5.26316	14955.6								region	WEU	TIG-rv	3	18187.3
	region	OCN	SHO-rv	5.26316	14958.5								region	WEU	TIG-rv	3	18217.1
	region	PAS	SHO-rv	5.26316	14958.5								region	EEU	TIG-rv	3	18217.1
	region	PAS	SHO-rv	5.26316	14959.8								region	EEU	TIG-rv	3	18246.9
	region	LAC	SHO-rv	5.26316	14959.8								region	FSU	TIG-rv	3	18246.9
	region	LAC	SHO-rv	5.26316	14960.5								region	FSU	TIG-rv	3	18455.5
	region	USA	EHO-rv	6.13482	14960.5								region	NAF	TIG-rv	3	18455.5
	region	USA	EHO-rv	6.13482	14967.1								region	NAF	TIG-rv	3	18515.1
	region	CAN	EHO-rv	6.13482	14967.1								region	EAF	TIG-rv	3	18515.1
	region	CAN	EHO-rv	6.13482	14967.1								region	EAF	TIG-rv	3	18544.9
	region	WEU	EHO-rv	6.13482	14967.1								region	WCA	TIG-rv	3	18544.9
	region	WEU	EHO-rv	6.13482	14967.2								region	WCA	TIG-rv	3	18634.3
	region	EEU	EHO-rv	6.13482	14967.2								region	SAF	TIG-rv	3	18634.3
	region	EEU	EHO-rv	6.13482	14967.3								region	SAF	TIG-rv	3	18656.7
	region	FSU	EHO-rv	6.13482	14967.3								region	MEE	TIG-rv	3	18656.7
	region	FSU	EHO-rv	6.13482	14967.3								region	MEE	TIG-rv	3	18768.5
	region	NAF	EHO-rv	6.13482	14967.3								region	CHN	TIG-rv	3	18768.5
	region	NAF	EHO-rv	6.13482	14967.4								region	CHN	TIG-rv	3	18790.9
	region	MEE	EHO-rv	6.13482	14967.4								region	OEA	TIG-rv	3	18790.9
	region	MEE	EHO-rv	6.13482	14967.4								region	OEA	TIG-rv	3	18813.3
	region	CHN	EHO-rv	6.13482	14967.4								region	IND	TIG-rv	3	18813.3
	region	CHN	EHO-rv	6.13482	14967.9								region	IND	TIG-rv	3	18835.7
	region	LAC	EHO-rv	6.13482	14967.9								region	OSA	TIG-rv	3	18835.7
	region	LAC	EHO-rv	6.13482	15003.4								region	OSA	TIG-rv	3	18880.5
	region	CAN	TAO-rv	6.13482	15003.4								region	OCN	TIG-rv	3	18880.5
	region	CAN	TAO-rv	6.13482	15117.1								region	OCN	TIG-rv	3	18910.3
	region	WEU	TAO-rv	6.13482	15117.1								region	PAS	TIG-rv	3	18910.3
	region	WEU	TAO-rv	6.13482	15117.3								region	PAS	TIG-rv	3	18955.1
	region	FSU	TAO-rv	6.13482	15117.3								region	LAC	TIG-rv	3	18955.1
	region	FSU	TAO-rv	6.13482	15191.3								region	LAC	TIG-rv	3	18999.9
	region	EAF	TAO-rv	6.13482	15191.3								region	USA	DEG-rv	3	18999.9
	region	EAF	TAO-rv	6.13482	15191.4								region	USA	DEG-rv	3	19148.9
	region	WCA	TAO-rv	6.13482	15191.4								region	CAN	DEG-rv	3	19148.9
	region	WCA	TAO-rv	6.13482	15191.8								region	CAN	DEG-rv	3	19186.1
	region	SAF	TAO-rv	6.13482	15191.8								region	WEU	DEG-rv	3	19186.1
	region	SAF	TAO-rv	6.13482	15192								region	WEU	DEG-rv	3	19208.5
	region	PAS	TAO-rv	6.13482	15192								region	EEU	DEG-rv	3	19208.5
	region	PAS	TAO-rv	6.13482	15192.4								region	EEU	DEG-rv	3	19230.9
	region	USA	SHO-rv	6.57895	15192.4								region	FSU	DEG-rv	3	19230.9
	region	USA	SHO-rv	6.57895	15418.3								region	FSU	DEG-rv	3	19454.5
	region	WEU	SHO-rv	6.57895	15418.3								region	NAF	DEG-rv	3	19454.5
	region	WEU	SHO-rv	6.57895	15419.5								region	NAF	DEG-rv	3	19529.1
	region	EEU	SHO-rv	6.57895	15419.5								region	EAF	DEG-rv	3	19529.1
	region	EEU	SHO-rv	6.57895	15419.6								region	EAF	DEG-rv	3	19551.5
	region	FSU	SHO-rv	6.57895	15419.6								region	WCA	DEG-rv	3	19551.5
	region	FSU	SHO-rv	6.57895	15421.1								region	WCA	DEG-rv	3	19603.7
	region	NAF	SHO-rv	6.57895	15421.1								region	SAF	DEG-rv	3	19603.7
	region	NAF	SHO-rv	6.57895	15421.9								region	SAF	DEG-rv	3	19618.7
	region	MEE	SHO-rv	6.57895	15421.9								region	MEE	DEG-rv	3	19618.7
	region	MEE	SHO-rv	6.57895	15422.8								region	MEE	DEG-rv	3	19670.9
	region	CHN	SHO-rv	6.57895	15422.8								region	CHN	DEG-rv	3	19670.9
	region	CHN	SHO-rv	6.57895	15423.9								region	CHN	DEG-rv	3	19685.9
	region	OCN	SHO-rv	6.57895	15423.9								region	IND	DEG-rv	3	19685.9
	region	OCN	SHO-rv	6.57895	15427.1								region	IND	DEG-rv	3	19700.9
	region	PAS	SHO-rv	6.57895	15427.1								region	OSA	DEG-rv	3	19700.9
	region	PAS	SHO-rv	6.57895	15428.6								region	OSA	DEG-rv	3	19738.1
	region	LAC	SHO-rv	6.57895	15428.6								region	OCN	DEG-rv	3	19738.1
	region	LAC	SHO-rv	6.57895	15429.3								region	OCN	DEG-rv	3	19753.1
	region	USA	EHO-rv	7.01202	15429.3								region	PAS	DEG-rv	3	19753.1
	region	USA	EHO-rv	7.01202	15440.2								region	PAS	DEG-rv	3	19768.1
	region	CAN	EHO-rv	7.01202	15440.2								region	LAC	DEG-rv	3	19768.1
	region	CAN	EHO-rv	7.01202	15440.2								region	LAC	DEG-rv	3	19812.9
	region	WEU	EHO-rv	7.01202	15440.2								region	USA	SHG-rv	3	19812.9
	region	WEU	EHO-rv	7.01202	15440.5								region	USA	SHG-rv	3	20185.5
	region	EEU	EHO-rv	7.01202	15440.5								region	CAN	SHG-rv	3	20185.5
	region	EEU	EHO-rv	7.01202	15440.5								region	CAN	SHG-rv	3	20222.7
	region	FSU	EHO-rv	7.01202	15440.5								region	WEU	SHG-rv	3	20222.7
	region	FSU	EHO-rv	7.01202	15440.7								region	WEU	SHG-rv	3	20267.5
	region	NAF	EHO-rv	7.01202	15440.7								region	EEU	SHG-rv	3	20267.5
	region	NAF	EHO-rv	7.01202	15440.7								region	EEU	SHG-rv	3	20312.3
	region	MEE	EHO-rv	7.01202	15440.7								region	FSU	SHG-rv	3	20312.3
	region	MEE	EHO-rv	7.01202	15440.7								region	FSU	SHG-rv	3	20759.3
	region	CHN	EHO-rv	7.01202	15440.7								region	NAF	SHG-rv	3	20759.3
	region	CHN	EHO-rv	7.01202	15441.4								region	NAF	SHG-rv	3	20789.1
	region	LAC	EHO-rv	7.01202	15441.4								region	EAF	SHG-rv	3	20789.1
	region	LAC	EHO-rv	7.01202	15472.4								region	EAF	SHG-rv	3	20804.1
	region	CAN	TAO-rv	7.01202	15472.4								region	WCA	SHG-rv	3	20804.1
	region	CAN	TAO-rv	7.01202	15662								region	WCA	SHG-rv	3	20863.7
	region	WEU	TAO-rv	7.01202	15662								region	SAF	SHG-rv	3	20863.7
	region	WEU	TAO-rv	7.01202	15662.3								region	SAF	SHG-rv	3	20878.7
	region	FSU	TAO-rv	7.01202	15662.3								region	MEE	SHG-rv	3	20878.7
	region	FSU	TAO-rv	7.01202	15773.4								region	MEE	SHG-rv	3	20908.5
	region	EAF	TAO-rv	7.01202	15773.4								region	CHN	SHG-rv	3	20908.5
	region	EAF	TAO-rv	7.01202	15773.8								region	CHN	SHG-rv	3	20923.5
	region	WCA	TAO-rv	7.01202	15773.8								region	OEA	SHG-rv	3	20923.5
	region	WCA	TAO-rv	7.01202	15774.4								region	OEA	SHG-rv	3	20938.5
	region	SAF	TAO-rv	7.01202	15774.4								region	IND	SHG-rv	3	20938.5
	region	SAF	TAO-rv	7.01202	15774.9								region	IND	SHG-rv	3	20953.5
	region	PAS	TAO-rv	7.01202	15774.9								region	OSA	SHG-rv	3	20953.5
	region	PAS	TAO-rv	7.01202	15775.3								region	OSA	SHG-rv	3	20998.3
	region	USA	EHO-rv	7.88921	15775.3								region	OCN	SHG-rv	3	20998.3
	region	USA	EHO-rv	7.88921	15784.2								region	OCN	SHG-rv	3	21028.1
	region	CAN	EHO-rv	7.88921	15784.2								region	PAS	SHG-rv	3	21028.1
	region	CAN	EHO-rv	7.88921	15784.2								region	PAS	SHG-rv	3	21043.1
	region	WEU	EHO-rv	7.88921	15784.2								region	LAC	SHG-rv	3	21043.1
	region	WEU	EHO-rv	7.88921	15784.3								region	LAC	SHG-rv	3	21072.9
	region	EEU	EHO-rv	7.88921	15784.3								region	USA	COG-rs	3.235	21072.9
	region	EEU	EHO-rv	7.88921	15784.3								region	USA	COG-rs	3.235	21097.4
	region	FSU	EHO-rv	7.88921	15784.3								region	CAN	COG-rs	3.235	21097.4
	region	FSU	EHO-rv	7.88921	15784.5								region	CAN	COG-rs	3.235	21127.4
	region	NAF	EHO-rv	7.88921	15784.5								region	WEU	COG-rs	3.235	21127.4
	region	NAF	EHO-rv	7.88921	15784.5								region	WEU	COG-rs	3.235	21147
	region	MEE	EHO-rv	7.88921	15784.5								region	EEU	COG-rs	3.235	21147
	region	MEE	EHO-rv	7.88921	15784.6								region	EEU	COG-rs	3.235	21149.5
	region	CHN	EHO-rv	7.88921	15784.6								region	FSU	COG-rs	3.235	21149.5
	region	CHN	EHO-rv	7.88921	15785.6								region	FSU	COG-rs	3.235	21373.7
	region	LAC	EHO-rv	7.88921	15785.6								region	NAF	COG-rs	3.235	21373.7
	region	LAC	EHO-rv	7.88921	15830.6								region	NAF	COG-rs	3.235	21398.5
	region	CAN	TAO-rv	7.88921	15830.6								region	EAF	COG-rs	3.235	21398.5
	region	CAN	TAO-rv	7.88921	15984.6								region	EAF	COG-rs	3.235	21400.2
	region	WEU	TAO-rv	7.88921	15984.6								region	SAF	COG-rs	3.235	21400.2
	region	WEU	TAO-rv	7.88921	15984.7								region	SAF	COG-rs	3.235	21401.3
	region	FSU	TAO-rv	7.88921	15984.7								region	CHN	COG-rs	3.235	21401.3
	region	FSU	TAO-rv	7.88921	16110								region	CHN	COG-rs	3.235	21420.7
	region	WCA	TAO-rv	7.88921	16110								region	OEA	COG-rs	3.235	21420.7
	region	WCA	TAO-rv	7.88921	16110.8								region	OEA	COG-rs	3.235	21423.8
	region	SAF	TAO-rv	7.88921	16110.8								region	IND	COG-rs	3.235	21423.8
	region	SAF	TAO-rv	7.88921	16111.4								region	IND	COG-rs	3.235	21426
	region	PAS	TAO-rv	7.88921	16111.4								region	OSA	COG-rs	3.235	21426
	region	PAS	TAO-rv	7.88921	16111.7								region	OSA	COG-rs	3.235	21428.9
	region	USA	SHO-rv	7.89474	16111.7								region	PAS	COG-rs	3.235	21428.9
	region	USA	SHO-rv	7.89474	16295.2								region	PAS	COG-rs	3.235	21435.8
	region	WEU	SHO-rv	7.89474	16295.2								region	LAC	COG-rs	3.235	21435.8
	region	WEU	SHO-rv	7.89474	16295.6								region	LAC	COG-rs	3.235	21458.1
	region	EEU	SHO-rv	7.89474	16295.6								region	ARC	COG-rs	3.235	21458.1
	region	EEU	SHO-rv	7.89474	16295.6								region	ARC	COG-rs	3.235	21785.9
	region	FSU	SHO-rv	7.89474	16295.6								region	USA	CMG-rv	3.7	21785.9
	region	FSU	SHO-rv	7.89474	16297.3								region	USA	CMG-rv	3.7	22018.6
	region	NAF	SHO-rv	7.89474	16297.3								region	CAN	CMG-rv	3.7	22018.6
	region	NAF	SHO-rv	7.89474	16298.6								region	CAN	CMG-rv	3.7	22083.9
	region	MEE	SHO-rv	7.89474	16298.6								region	WEU	CMG-rv	3.7	22083.9
	region	MEE	SHO-rv	7.89474	16326.3								region	WEU	CMG-rv	3.7	22149.1
	region	CHN	SHO-rv	7.89474	16326.3								region	EEU	CMG-rv	3.7	22149.1
	region	CHN	SHO-rv	7.89474	16327.9								region	EEU	CMG-rv	3.7	22167.9
	region	OCN	SHO-rv	7.89474	16327.9								region	FSU	CMG-rv	3.7	22167.9
	region	OCN	SHO-rv	7.89474	16330.1								region	FSU	CMG-rv	3.7	22354.1
	region	PAS	SHO-rv	7.89474	16330.1								region	NAF	CMG-rv	3.7	22354.1
	region	PAS	SHO-rv	7.89474	16331.1								region	NAF	CMG-rv	3.7	22391.4
	region	LAC	SHO-rv	7.89474	16331.1								region	EAF	CMG-rv	3.7	22391.4
	region	LAC	SHO-rv	7.89474	16332.1								region	EAF	CMG-rv	3.7	22410.1
	region	USA	EHO-rv	8.7664	16332.1								region	WCA	CMG-rv	3.7	22410.1
	region	USA	EHO-rv	8.7664	16345.5								region	WCA	CMG-rv	3.7	22428.9
	region	CAN	EHO-rv	8.7664	16345.5								region	SAF	CMG-rv	3.7	22428.9
	region	CAN	EHO-rv	8.7664	16345.5								region	SAF	CMG-rv	3.7	22447.6
	region	WEU	EHO-rv	8.7664	16345.5								region	MEE	CMG-rv	3.7	22447.6
	region	WEU	EHO-rv	8.7664	16345.6								region	MEE	CMG-rv	3.7	22466.4
	region	EEU	EHO-rv	8.7664	16345.6								region	CHN	CMG-rv	3.7	22466.4
	region	EEU	EHO-rv	8.7664	16345.7								region	CHN	CMG-rv	3.7	22606.1
	region	FSU	EHO-rv	8.7664	16345.7								region	IND	CMG-rv	3.7	22606.1
	region	FSU	EHO-rv	8.7664	16345.9								region	IND	CMG-rv	3.7	22671.4
	region	NAF	EHO-rv	8.7664	16345.9								region	OSA	CMG-rv	3.7	22671.4
	region	NAF	EHO-rv	8.7664	16346								region	OSA	CMG-rv	3.7	22680.6
	region	MEE	EHO-rv	8.7664	16346								region	JPN	CMG-rv	3.7	22680.6
	region	MEE	EHO-rv	8.7664	16346								region	JPN	CMG-rv	3.7	22689.9
	region	CHN	EHO-rv	8.7664	16346								region	OCN	CMG-rv	3.7	22689.9
	region	CHN	EHO-rv	8.7664	16347								region	OCN	CMG-rv	3.7	22736.4
	region	LAC	EHO-rv	8.7664	16347								region	PAS	CMG-rv	3.7	22736.4
	region	LAC	EHO-rv	8.7664	16419								region	PAS	CMG-rv	3.7	22745.6
	region	CAN	TAO-rv	8.7664	16419								region	LAC	CMG-rv	3.7	22745.6
	region	CAN	TAO-rv	8.7664	16650								region	LAC	CMG-rv	3.7	22801.6
	region	WEU	TAO-rv	8.7664	16650								region	USA	TIG-rv	3.7	22801.6
	region	WEU	TAO-rv	8.7664	16650.3								region	USA	TIG-rv	3.7	23081.1
	region	FSU	TAO-rv	8.7664	16650.3								region	CAN	TIG-rv	3.7	23081.1
	region	FSU	TAO-rv	8.7664	16800.6								region	CAN	TIG-rv	3.7	23220.9
	region	EAF	TAO-rv	8.7664	16800.6								region	WEU	TIG-rv	3.7	23220.9
	region	EAF	TAO-rv	8.7664	16800.8								region	WEU	TIG-rv	3.7	23258.1
	region	WCA	TAO-rv	8.7664	16800.8								region	EEU	TIG-rv	3.7	23258.1
	region	WCA	TAO-rv	8.7664	16801.7								region	EEU	TIG-rv	3.7	23295.4
	region	SAF	TAO-rv	8.7664	16801.7								region	FSU	TIG-rv	3.7	23295.4
	region	SAF	TAO-rv	8.7664	16802.1								region	FSU	TIG-rv	3.7	23556.1
	region	PAS	TAO-rv	8.7664	16802.1								region	NAF	TIG-rv	3.7	23556.1
	region	PAS	TAO-rv	8.7664	16802.9								region	NAF	TIG-rv	3.7	23630.6
	region	USA	SHO-rv	9.21053	16802.9								region	EAF	TIG-rv	3.7	23630.6
	region	USA	SHO-rv	9.21053	17078								region	EAF	TIG-rv	3.7	23667.9
	region	WEU	SHO-rv	9.21053	17078								region	WCA	TIG-rv	3.7	23667.9
	region	WEU	SHO-rv	9.21053	17079								region	WCA	TIG-rv	3.7	23779.6
	region	EEU	SHO-rv	9.21053	17079								region	SAF	TIG-rv	3.7	23779.6
	region	EEU	SHO-rv	9.21053	17079								region	SAF	TIG-rv	3.7	23807.6
	region	FSU	SHO-rv	9.21053	17079								region	MEE	TIG-rv	3.7	23807.6
	region	FSU	SHO-rv	9.21053	17081.1								region	MEE	TIG-rv	3.7	23947.4
	region	NAF	SHO-rv	9.21053	17081.1								region	CHN	TIG-rv	3.7	23947.4
	region	NAF	SHO-rv	9.21053	17082.3								region	CHN	TIG-rv	3.7	23975.4
	region	MEE	SHO-rv	9.21053	17082.3								region	OEA	TIG-rv	3.7	23975.4
	region	MEE	SHO-rv	9.21053	17089.8								region	OEA	TIG-rv	3.7	24003.4
	region	CHN	SHO-rv	9.21053	17089.8								region	IND	TIG-rv	3.7	24003.4
	region	CHN	SHO-rv	9.21053	17091.4								region	IND	TIG-rv	3.7	24031.4
	region	OCN	SHO-rv	9.21053	17091.4								region	OSA	TIG-rv	3.7	24031.4
	region	OCN	SHO-rv	9.21053	17097.2								region	OSA	TIG-rv	3.7	24087.4
	region	PAS	SHO-rv	9.21053	17097.2								region	OCN	TIG-rv	3.7	24087.4
	region	PAS	SHO-rv	9.21053	17099.9								region	OCN	TIG-rv	3.7	24124.6
	region	LAC	SHO-rv	9.21053	17099.9								region	PAS	TIG-rv	3.7	24124.6
	region	LAC	SHO-rv	9.21053	17101.4								region	PAS	TIG-rv	3.7	24180.6
	region	USA	EHO-rv	9.64359	17101.4								region	LAC	TIG-rv	3.7	24180.6
	region	USA	EHO-rv	9.64359	17123.7								region	LAC	TIG-rv	3.7	24236.6
	region	CAN	EHO-rv	9.64359	17123.7								region	USA	DEG-rv	3.7	24236.6
	region	CAN	EHO-rv	9.64359	17123.7								region	USA	DEG-rv	3.7	24422.9
	region	WEU	EHO-rv	9.64359	17123.7								region	CAN	DEG-rv	3.7	24422.9
	region	WEU	EHO-rv	9.64359	17124.2								region	CAN	DEG-rv	3.7	24469.4
	region	EEU	EHO-rv	9.64359	17124.2								region	WEU	DEG-rv	3.7	24469.4
	region	EEU	EHO-rv	9.64359	17124.3								region	WEU	DEG-rv	3.7	24497.4
	region	FSU	EHO-rv	9.64359	17124.3								region	EEU	DEG-rv	3.7	24497.4
	region	FSU	EHO-rv	9.64359	17124.5								region	EEU	DEG-rv	3.7	24525.4
	region	NAF	EHO-rv	9.64359	17124.5								region	FSU	DEG-rv	3.7	24525.4
	region	NAF	EHO-rv	9.64359	17124.6								region	FSU	DEG-rv	3.7	24804.9
	region	MEE	EHO-rv	9.64359	17124.6								region	NAF	DEG-rv	3.7	24804.9
	region	MEE	EHO-rv	9.64359	17124.6								region	NAF	DEG-rv	3.7	24898.1
	region	CHN	EHO-rv	9.64359	17124.6								region	EAF	DEG-rv	3.7	24898.1
	region	CHN	EHO-rv	9.64359	17126								region	EAF	DEG-rv	3.7	24926.1
	region	LAC	EHO-rv	9.64359	17126								region	WCA	DEG-rv	3.7	24926.1
	region	LAC	EHO-rv	9.64359	17189								region	WCA	DEG-rv	3.7	24991.4
	region	CAN	TAO-rv	9.64359	17189								region	SAF	DEG-rv	3.7	24991.4
	region	CAN	TAO-rv	9.64359	17574								region	SAF	DEG-rv	3.7	25010.1
	region	WEU	TAO-rv	9.64359	17574								region	MEE	DEG-rv	3.7	25010.1
	region	WEU	TAO-rv	9.64359	17574.6								region	MEE	DEG-rv	3.7	25075.4
	region	FSU	TAO-rv	9.64359	17574.6								region	CHN	DEG-rv	3.7	25075.4
	region	FSU	TAO-rv	9.64359	17800.2								region	CHN	DEG-rv	3.7	25094.1
	region	EAF	TAO-rv	9.64359	17800.2								region	IND	DEG-rv	3.7	25094.1
	region	EAF	TAO-rv	9.64359	17801								region	IND	DEG-rv	3.7	25112.9
	region	WCA	TAO-rv	9.64359	17801								region	OSA	DEG-rv	3.7	25112.9
	region	WCA	TAO-rv	9.64359	17802.1								region	OSA	DEG-rv	3.7	25159.4
	region	SAF	TAO-rv	9.64359	17802.1								region	OCN	DEG-rv	3.7	25159.4
	region	SAF	TAO-rv	9.64359	17803.1								region	OCN	DEG-rv	3.7	25178.1
	region	PAS	TAO-rv	9.64359	17803.1								region	PAS	DEG-rv	3.7	25178.1
	region	PAS	TAO-rv	9.64359	17804								region	PAS	DEG-rv	3.7	25196.9
	region	USA	EHO-rs	10.5208	17804								region	LAC	DEG-rv	3.7	25196.9
	region	USA	EHO-rs	10.5208	17885.8								region	LAC	DEG-rv	3.7	25252.9
	region	CAN	EHO-rs	10.5208	17885.8								region	USA	SHG-rv	3.7	25252.9
	region	CAN	EHO-rs	10.5208	18039.8								region	USA	SHG-rv	3.7	25718.6
	region	WEU	EHO-rs	10.5208	18039.8								region	CAN	SHG-rv	3.7	25718.6
	region	WEU	EHO-rs	10.5208	18040.1								region	CAN	SHG-rv	3.7	25765.1
	region	EEU	EHO-rs	10.5208	18040.1								region	WEU	SHG-rv	3.7	25765.1
	region	EEU	EHO-rs	10.5208	18040.1								region	WEU	SHG-rv	3.7	25821.1
	region	FSU	EHO-rs	10.5208	18040.1								region	EEU	SHG-rv	3.7	25821.1
	region	FSU	EHO-rs	10.5208	18040.4								region	EEU	SHG-rv	3.7	25877.1
	region	MEE	EHO-rs	10.5208	18040.4								region	FSU	SHG-rv	3.7	25877.1
	region	MEE	EHO-rs	10.5208	18172.4								region	FSU	SHG-rv	3.7	26435.9
	region	CHN	EHO-rs	10.5208	18172.4								region	NAF	SHG-rv	3.7	26435.9
	region	CHN	EHO-rs	10.5208	18176.6								region	NAF	SHG-rv	3.7	26473.1
	region	OEA	EHO-rs	10.5208	18176.6								region	EAF	SHG-rv	3.7	26473.1
	region	OEA	EHO-rs	10.5208	18177.7								region	EAF	SHG-rv	3.7	26491.9
	region	IND	EHO-rs	10.5208	18177.7								region	WCA	SHG-rv	3.7	26491.9
	region	IND	EHO-rs	10.5208	18178.1								region	WCA	SHG-rv	3.7	26566.4
	region	LAC	EHO-rs	10.5208	18178.1								region	SAF	SHG-rv	3.7	26566.4
	region	LAC	EHO-rs	10.5208	18178.3								region	SAF	SHG-rv	3.7	26585.1
	region	USA	TAO-rs	10.5208	18178.3								region	MEE	SHG-rv	3.7	26585.1
	region	USA	TAO-rs	10.5208	18183.2								region	MEE	SHG-rv	3.7	26622.4
	region	CAN	TAO-rs	10.5208	18183.2								region	CHN	SHG-rv	3.7	26622.4
	region	CAN	TAO-rs	10.5208	18861.2								region	CHN	SHG-rv	3.7	26641.1
	region	WEU	TAO-rs	10.5208	18861.2								region	OEA	SHG-rv	3.7	26641.1
	region	WEU	TAO-rs	10.5208	18861.3								region	OEA	SHG-rv	3.7	26659.9
	region	EEU	TAO-rs	10.5208	18861.3								region	IND	SHG-rv	3.7	26659.9
	region	EEU	TAO-rs	10.5208	18861.3								region	IND	SHG-rv	3.7	26678.6
	region	FSU	TAO-rs	10.5208	18861.3								region	OSA	SHG-rv	3.7	26678.6
	region	FSU	TAO-rs	10.5208	19061.1								region	OSA	SHG-rv	3.7	26734.6
	region	EAF	TAO-rs	10.5208	19061.1								region	OCN	SHG-rv	3.7	26734.6
	region	EAF	TAO-rs	10.5208	19061.2								region	OCN	SHG-rv	3.7	26771.9
	region	WCA	TAO-rs	10.5208	19061.2								region	PAS	SHG-rv	3.7	26771.9
	region	WCA	TAO-rs	10.5208	19061.5								region	PAS	SHG-rv	3.7	26790.6
	region	SAF	TAO-rs	10.5208	19061.5								region	LAC	SHG-rv	3.7	26790.6
	region	SAF	TAO-rs	10.5208	19061.8								region	LAC	SHG-rv	3.7	26827.9
	region	CHN	TAO-rs	10.5208	19061.8								region	USA	CMG-rv	4.54	26827.9
	region	CHN	TAO-rs	10.5208	19061.9								region	USA	CMG-rv	4.54	27107.2
	region	PAS	TAO-rs	10.5208	19061.9								region	CAN	CMG-rv	4.54	27107.2
	region	PAS	TAO-rs	10.5208	19062.2								region	CAN	CMG-rv	4.54	27185.5
	region	LAC	TAO-rs	10.5208	19062.2								region	WEU	CMG-rv	4.54	27185.5
	region	LAC	TAO-rs	10.5208	19425.3								region	WEU	CMG-rv	4.54	27263.8
	region	USA	SHO-rv	10.5263	19425.3								region	EEU	CMG-rv	4.54	27263.8
	region	USA	SHO-rv	10.5263	19883.9								region	EEU	CMG-rv	4.54	27286.3
	region	WEU	SHO-rv	10.5263	19883.9								region	FSU	CMG-rv	4.54	27286.3
	region	WEU	SHO-rv	10.5263	19886.4								region	FSU	CMG-rv	4.54	27509.8
	region	EEU	SHO-rv	10.5263	19886.4								region	NAF	CMG-rv	4.54	27509.8
	region	EEU	SHO-rv	10.5263	19886.4								region	NAF	CMG-rv	4.54	27554.5
	region	FSU	SHO-rv	10.5263	19886.4								region	EAF	CMG-rv	4.54	27554.5
	region	FSU	SHO-rv	10.5263	19889.5								region	EAF	CMG-rv	4.54	27577
	region	NAF	SHO-rv	10.5263	19889.5								region	WCA	CMG-rv	4.54	27577
	region	NAF	SHO-rv	10.5263	19891.2								region	WCA	CMG-rv	4.54	27599.5
	region	MEE	SHO-rv	10.5263	19891.2								region	SAF	CMG-rv	4.54	27599.5
	region	MEE	SHO-rv	10.5263	19893								region	SAF	CMG-rv	4.54	27622
	region	CHN	SHO-rv	10.5263	19893								region	MEE	CMG-rv	4.54	27622
	region	CHN	SHO-rv	10.5263	19895.2								region	MEE	CMG-rv	4.54	27644.5
	region	OCN	SHO-rv	10.5263	19895.2								region	CHN	CMG-rv	4.54	27644.5
	region	OCN	SHO-rv	10.5263	19901.7								region	CHN	CMG-rv	4.54	27812.2
	region	PAS	SHO-rv	10.5263	19901.7								region	IND	CMG-rv	4.54	27812.2
	region	PAS	SHO-rv	10.5263	19904.8								region	IND	CMG-rv	4.54	27890.5
	region	LAC	SHO-rv	10.5263	19904.8								region	OSA	CMG-rv	4.54	27890.5
	region	LAC	SHO-rv	10.5263	19906.1								region	OSA	CMG-rv	4.54	27901.6
	region	USA	EHO-rs	11.398	19906.1								region	JPN	CMG-rv	4.54	27901.6
	region	USA	EHO-rs	11.398	20015.2								region	JPN	CMG-rv	4.54	27912.7
	region	CAN	EHO-rs	11.398	20015.2								region	OCN	CMG-rv	4.54	27912.7
	region	CAN	EHO-rs	11.398	20076.8								region	OCN	CMG-rv	4.54	27968.5
	region	WEU	EHO-rs	11.398	20076.8								region	PAS	CMG-rv	4.54	27968.5
	region	WEU	EHO-rs	11.398	20077.2								region	PAS	CMG-rv	4.54	27979.6
	region	EEU	EHO-rs	11.398	20077.2								region	LAC	CMG-rv	4.54	27979.6
	region	EEU	EHO-rs	11.398	20077.2								region	LAC	CMG-rv	4.54	28046.8
	region	FSU	EHO-rs	11.398	20077.2								region	USA	TIG-rv	4.54	28046.8
	region	FSU	EHO-rs	11.398	20077.5								region	USA	TIG-rv	4.54	28382.2
	region	NAF	EHO-rs	11.398	20077.5								region	CAN	TIG-rv	4.54	28382.2
	region	NAF	EHO-rs	11.398	20077.7								region	CAN	TIG-rv	4.54	28549.9
	region	MEE	EHO-rs	11.398	20077.7								region	WEU	TIG-rv	4.54	28549.9
	region	MEE	EHO-rs	11.398	20165.7								region	WEU	TIG-rv	4.54	28594.6
	region	CHN	EHO-rs	11.398	20165.7								region	EEU	TIG-rv	4.54	28594.6
	region	CHN	EHO-rs	11.398	20170.6								region	EEU	TIG-rv	4.54	28639.3
	region	OEA	EHO-rs	11.398	20170.6								region	FSU	TIG-rv	4.54	28639.3
	region	OEA	EHO-rs	11.398	20171.7								region	FSU	TIG-rv	4.54	28952.2
	region	IND	EHO-rs	11.398	20171.7								region	NAF	TIG-rv	4.54	28952.2
	region	IND	EHO-rs	11.398	20172								region	NAF	TIG-rv	4.54	29041.6
	region	LAC	EHO-rs	11.398	20172								region	EAF	TIG-rv	4.54	29041.6
	region	LAC	EHO-rs	11.398	20172.1								region	EAF	TIG-rv	4.54	29086.3
	region	USA	TAO-rs	11.398	20172.1								region	WCA	TIG-rv	4.54	29086.3
	region	USA	TAO-rs	11.398	20178.6								region	WCA	TIG-rv	4.54	29220.4
	region	CAN	TAO-rs	11.398	20178.6								region	SAF	TIG-rv	4.54	29220.4
	region	CAN	TAO-rs	11.398	20449.8								region	SAF	TIG-rv	4.54	29254
	region	WEU	TAO-rs	11.398	20449.8								region	MEE	TIG-rv	4.54	29254
	region	WEU	TAO-rs	11.398	20449.9								region	MEE	TIG-rv	4.54	29421.7
	region	EEU	TAO-rs	11.398	20449.9								region	CHN	TIG-rv	4.54	29421.7
	region	EEU	TAO-rs	11.398	20449.9								region	CHN	TIG-rv	4.54	29455.3
	region	FSU	TAO-rs	11.398	20449.9								region	OEA	TIG-rv	4.54	29455.3
	region	FSU	TAO-rs	11.398	20649.7								region	OEA	TIG-rv	4.54	29488.9
	region	EAF	TAO-rs	11.398	20649.7								region	IND	TIG-rv	4.54	29488.9
	region	EAF	TAO-rs	11.398	20649.8								region	IND	TIG-rv	4.54	29522.5
	region	WCA	TAO-rs	11.398	20649.8								region	OSA	TIG-rv	4.54	29522.5
	region	WCA	TAO-rs	11.398	20650.2								region	OSA	TIG-rv	4.54	29589.7
	region	SAF	TAO-rs	11.398	20650.2								region	OCN	TIG-rv	4.54	29589.7
	region	SAF	TAO-rs	11.398	20650.4								region	OCN	TIG-rv	4.54	29634.4
	region	CHN	TAO-rs	11.398	20650.4								region	PAS	TIG-rv	4.54	29634.4
	region	CHN	TAO-rs	11.398	20650.5								region	PAS	TIG-rv	4.54	29701.6
	region	PAS	TAO-rs	11.398	20650.5								region	LAC	TIG-rv	4.54	29701.6
	region	PAS	TAO-rs	11.398	20650.7								region	LAC	TIG-rv	4.54	29768.8
	region	LAC	TAO-rs	11.398	20650.7								region	USA	DEG-rv	4.54	29768.8
	region	LAC	TAO-rs	11.398	20832.2								region	USA	DEG-rv	4.54	29992.3
	region	USA	SHO-rs	11.8421	20832.2								region	CAN	DEG-rv	4.54	29992.3
	region	USA	SHO-rs	11.8421	21211								region	CAN	DEG-rv	4.54	30048.1
	region	CAN	SHO-rs	11.8421	21211								region	WEU	DEG-rv	4.54	30048.1
	region	CAN	SHO-rs	11.8421	21220.2								region	WEU	DEG-rv	4.54	30081.7
	region	WEU	SHO-rs	11.8421	21220.2								region	EEU	DEG-rv	4.54	30081.7
	region	WEU	SHO-rs	11.8421	21231.5								region	EEU	DEG-rv	4.54	30115.3
	region	EEU	SHO-rs	11.8421	21231.5								region	FSU	DEG-rv	4.54	30115.3
	region	EEU	SHO-rs	11.8421	21231.6								region	FSU	DEG-rv	4.54	30450.7
	region	FSU	SHO-rs	11.8421	21231.6								region	NAF	DEG-rv	4.54	30450.7
	region	FSU	SHO-rs	11.8421	21309.7								region	NAF	DEG-rv	4.54	30562.6
	region	EAF	SHO-rs	11.8421	21309.7								region	EAF	DEG-rv	4.54	30562.6
	region	EAF	SHO-rs	11.8421	21309.7								region	EAF	DEG-rv	4.54	30596.2
	region	WCA	SHO-rs	11.8421	21309.7								region	WCA	DEG-rv	4.54	30596.2
	region	WCA	SHO-rs	11.8421	21333.7								region	WCA	DEG-rv	4.54	30674.5
	region	SAF	SHO-rs	11.8421	21333.7								region	SAF	DEG-rv	4.54	30674.5
	region	SAF	SHO-rs	11.8421	21333.7								region	SAF	DEG-rv	4.54	30697
	region	MEE	SHO-rs	11.8421	21333.7								region	MEE	DEG-rv	4.54	30697
	region	MEE	SHO-rs	11.8421	21348.3								region	MEE	DEG-rv	4.54	30775.3
	region	CHN	SHO-rs	11.8421	21348.3								region	CHN	DEG-rv	4.54	30775.3
	region	CHN	SHO-rs	11.8421	21351.2								region	CHN	DEG-rv	4.54	30797.8
	region	OEA	SHO-rs	11.8421	21351.2								region	IND	DEG-rv	4.54	30797.8
	region	OEA	SHO-rs	11.8421	21351.2								region	IND	DEG-rv	4.54	30820.3
	region	OCN	SHO-rs	11.8421	21351.2								region	OSA	DEG-rv	4.54	30820.3
	region	OCN	SHO-rs	11.8421	21356.9								region	OSA	DEG-rv	4.54	30876.1
	region	PAS	SHO-rs	11.8421	21356.9								region	OCN	DEG-rv	4.54	30876.1
	region	PAS	SHO-rs	11.8421	21359.4								region	OCN	DEG-rv	4.54	30898.6
	region	LAC	SHO-rs	11.8421	21359.4								region	PAS	DEG-rv	4.54	30898.6
	region	LAC	SHO-rs	11.8421	21389.1								region	PAS	DEG-rv	4.54	30921.1
	region	USA	EHO-rs	12.7138	21389.1								region	LAC	DEG-rv	4.54	30921.1
	region	USA	EHO-rs	12.7138	21498.1								region	LAC	DEG-rv	4.54	30988.3
	region	CAN	EHO-rs	12.7138	21498.1								region	USA	SHG-rv	4.54	30988.3
	region	CAN	EHO-rs	12.7138	21559.7								region	USA	SHG-rv	4.54	31547.2
	region	WEU	EHO-rs	12.7138	21559.7								region	CAN	SHG-rv	4.54	31547.2
	region	WEU	EHO-rs	12.7138	21560.2								region	CAN	SHG-rv	4.54	31603
	region	EEU	EHO-rs	12.7138	21560.2								region	WEU	SHG-rv	4.54	31603
	region	EEU	EHO-rs	12.7138	21560.2								region	WEU	SHG-rv	4.54	31670.2
	region	FSU	EHO-rs	12.7138	21560.2								region	EEU	SHG-rv	4.54	31670.2
	region	FSU	EHO-rs	12.7138	21560.4								region	EEU	SHG-rv	4.54	31737.4
	region	NAF	EHO-rs	12.7138	21560.4								region	FSU	SHG-rv	4.54	31737.4
	region	NAF	EHO-rs	12.7138	21560.8								region	FSU	SHG-rv	4.54	32407.9
	region	MEE	EHO-rs	12.7138	21560.8								region	NAF	SHG-rv	4.54	32407.9
	region	MEE	EHO-rs	12.7138	21648.9								region	NAF	SHG-rv	4.54	32452.6
	region	CHN	EHO-rs	12.7138	21648.9								region	EAF	SHG-rv	4.54	32452.6
	region	CHN	EHO-rs	12.7138	21653.8								region	EAF	SHG-rv	4.54	32475.1
	region	OEA	EHO-rs	12.7138	21653.8								region	WCA	SHG-rv	4.54	32475.1
	region	OEA	EHO-rs	12.7138	21655.2								region	WCA	SHG-rv	4.54	32564.5
	region	IND	EHO-rs	12.7138	21655.2								region	SAF	SHG-rv	4.54	32564.5
	region	IND	EHO-rs	12.7138	21655.6								region	SAF	SHG-rv	4.54	32587
	region	LAC	EHO-rs	12.7138	21655.6								region	MEE	SHG-rv	4.54	32587
	region	LAC	EHO-rs	12.7138	21655.7								region	MEE	SHG-rv	4.54	32631.7
	region	USA	TAO-rs	12.7138	21655.7								region	CHN	SHG-rv	4.54	32631.7
	region	USA	TAO-rs	12.7138	21662.2								region	CHN	SHG-rv	4.54	32654.2
	region	CAN	TAO-rs	12.7138	21662.2								region	OEA	SHG-rv	4.54	32654.2
	region	CAN	TAO-rs	12.7138	21933.5								region	OEA	SHG-rv	4.54	32676.7
	region	WEU	TAO-rs	12.7138	21933.5								region	IND	SHG-rv	4.54	32676.7
	region	WEU	TAO-rs	12.7138	21933.5								region	IND	SHG-rv	4.54	32699.2
	region	EEU	TAO-rs	12.7138	21933.5								region	OSA	SHG-rv	4.54	32699.2
	region	EEU	TAO-rs	12.7138	21933.6								region	OSA	SHG-rv	4.54	32766.4
	region	FSU	TAO-rs	12.7138	21933.6								region	OCN	SHG-rv	4.54	32766.4
	region	FSU	TAO-rs	12.7138	22133.3								region	OCN	SHG-rv	4.54	32811.1
	region	EAF	TAO-rs	12.7138	22133.3								region	PAS	SHG-rv	4.54	32811.1
	region	EAF	TAO-rs	12.7138	22133.5								region	PAS	SHG-rv	4.54	32833.6
	region	WCA	TAO-rs	12.7138	22133.5								region	LAC	SHG-rv	4.54	32833.6
	region	WCA	TAO-rs	12.7138	22133.8								region	LAC	SHG-rv	4.54	32878.3
	region	SAF	TAO-rs	12.7138	22133.8								region	USA	CMG-rv	5.548	32878.3
	region	SAF	TAO-rs	12.7138	22134.1								region	USA	CMG-rv	5.548	33111
	region	CHN	TAO-rs	12.7138	22134.1								region	CAN	CMG-rv	5.548	33111
	region	CHN	TAO-rs	12.7138	22134.2								region	CAN	CMG-rv	5.548	33176.3
	region	PAS	TAO-rs	12.7138	22134.2								region	WEU	CMG-rv	5.548	33176.3
	region	PAS	TAO-rs	12.7138	22134.4								region	WEU	CMG-rv	5.548	33241.5
	region	LAC	TAO-rs	12.7138	22134.4								region	EEU	CMG-rv	5.548	33241.5
	region	LAC	TAO-rs	12.7138	22315.9								region	EEU	CMG-rv	5.548	33260.3
	region	USA	SHO-rs	13.1579	22315.9								region	FSU	CMG-rv	5.548	33260.3
	region	USA	SHO-rs	13.1579	22821								region	FSU	CMG-rv	5.548	33446.5
	region	CAN	SHO-rs	13.1579	22821								region	NAF	CMG-rv	5.548	33446.5
	region	CAN	SHO-rs	13.1579	22824.7								region	NAF	CMG-rv	5.548	33483.8
	region	WEU	SHO-rs	13.1579	22824.7								region	EAF	CMG-rv	5.548	33483.8
	region	WEU	SHO-rs	13.1579	22841.7								region	EAF	CMG-rv	5.548	33502.5
	region	EEU	SHO-rs	13.1579	22841.7								region	WCA	CMG-rv	5.548	33502.5
	region	EEU	SHO-rs	13.1579	22841.7								region	WCA	CMG-rv	5.548	33521.3
	region	FSU	SHO-rs	13.1579	22841.7								region	SAF	CMG-rv	5.548	33521.3
	region	FSU	SHO-rs	13.1579	22919.9								region	SAF	CMG-rv	5.548	33540
	region	NAF	SHO-rs	13.1579	22919.9								region	MEE	CMG-rv	5.548	33540
	region	NAF	SHO-rs	13.1579	22927.4								region	MEE	CMG-rv	5.548	33558.8
	region	EAF	SHO-rs	13.1579	22927.4								region	CHN	CMG-rv	5.548	33558.8
	region	EAF	SHO-rs	13.1579	22927.4								region	CHN	CMG-rv	5.548	33698.5
	region	WCA	SHO-rs	13.1579	22927.4								region	IND	CMG-rv	5.548	33698.5
	region	WCA	SHO-rs	13.1579	22951.3								region	IND	CMG-rv	5.548	33763.8
	region	SAF	SHO-rs	13.1579	22951.3								region	OSA	CMG-rv	5.548	33763.8
	region	SAF	SHO-rs	13.1579	22951.4								region	OSA	CMG-rv	5.548	33773
	region	MEE	SHO-rs	13.1579	22951.4								region	JPN	CMG-rv	5.548	33773
	region	MEE	SHO-rs	13.1579	22961.1								region	JPN	CMG-rv	5.548	33782.3
	region	CHN	SHO-rs	13.1579	22961.1								region	OCN	CMG-rv	5.548	33782.3
	region	CHN	SHO-rs	13.1579	22964.4								region	OCN	CMG-rv	5.548	33828.8
	region	OEA	SHO-rs	13.1579	22964.4								region	PAS	CMG-rv	5.548	33828.8
	region	OEA	SHO-rs	13.1579	22964.5								region	PAS	CMG-rv	5.548	33838
	region	OCN	SHO-rs	13.1579	22964.5								region	LAC	CMG-rv	5.548	33838
	region	OCN	SHO-rs	13.1579	22970.2								region	LAC	CMG-rv	5.548	33894
	region	PAS	SHO-rs	13.1579	22970.2								region	USA	TIG-rv	5.548	33894
	region	PAS	SHO-rs	13.1579	22971.7								region	USA	TIG-rv	5.548	34173.5
	region	LAC	SHO-rs	13.1579	22971.7								region	CAN	TIG-rv	5.548	34173.5
	region	LAC	SHO-rs	13.1579	22986.5								region	CAN	TIG-rv	5.548	34313.3
	region	USA	EHO-rs	14.6875	22986.5								region	WEU	TIG-rv	5.548	34313.3
	region	USA	EHO-rs	14.6875	23231.9								region	WEU	TIG-rv	5.548	34350.5
	region	CAN	EHO-rs	14.6875	23231.9								region	EEU	TIG-rv	5.548	34350.5
	region	CAN	EHO-rs	14.6875	23262.7								region	EEU	TIG-rv	5.548	34387.8
	region	WEU	EHO-rs	14.6875	23262.7								region	FSU	TIG-rv	5.548	34387.8
	region	WEU	EHO-rs	14.6875	23264.5								region	FSU	TIG-rv	5.548	34648.5
	region	EEU	EHO-rs	14.6875	23264.5								region	NAF	TIG-rv	5.548	34648.5
	region	EEU	EHO-rs	14.6875	23264.5								region	NAF	TIG-rv	5.548	34723
	region	FSU	EHO-rs	14.6875	23264.5								region	EAF	TIG-rv	5.548	34723
	region	FSU	EHO-rs	14.6875	23265								region	EAF	TIG-rv	5.548	34760.3
	region	NAF	EHO-rs	14.6875	23265								region	WCA	TIG-rv	5.548	34760.3
	region	NAF	EHO-rs	14.6875	23266.4								region	WCA	TIG-rv	5.548	34872
	region	MEE	EHO-rs	14.6875	23266.4								region	SAF	TIG-rv	5.548	34872
	region	MEE	EHO-rs	14.6875	23398.4								region	SAF	TIG-rv	5.548	34900
	region	CHN	EHO-rs	14.6875	23398.4								region	MEE	TIG-rv	5.548	34900
	region	CHN	EHO-rs	14.6875	23412.5								region	MEE	TIG-rv	5.548	35039.8
	region	OEA	EHO-rs	14.6875	23412.5								region	CHN	TIG-rv	5.548	35039.8
	region	OEA	EHO-rs	14.6875	23416								region	CHN	TIG-rv	5.548	35067.8
	region	IND	EHO-rs	14.6875	23416								region	OEA	TIG-rv	5.548	35067.8
	region	IND	EHO-rs	14.6875	23417								region	OEA	TIG-rv	5.548	35095.8
	region	LAC	EHO-rs	14.6875	23417								region	IND	TIG-rv	5.548	35095.8
	region	LAC	EHO-rs	14.6875	23417.2								region	IND	TIG-rv	5.548	35123.8
	region	USA	TAO-rs	14.6875	23417.2								region	OSA	TIG-rv	5.548	35123.8
	region	USA	TAO-rs	14.6875	23431.9								region	OSA	TIG-rv	5.548	35179.8
	region	CAN	TAO-rs	14.6875	23431.9								region	OCN	TIG-rv	5.548	35179.8
	region	CAN	TAO-rs	14.6875	23567.5								region	OCN	TIG-rv	5.548	35217
	region	WEU	TAO-rs	14.6875	23567.5								region	PAS	TIG-rv	5.548	35217
	region	WEU	TAO-rs	14.6875	23567.8								region	PAS	TIG-rv	5.548	35273
	region	EEU	TAO-rs	14.6875	23567.8								region	LAC	TIG-rv	5.548	35273
	region	EEU	TAO-rs	14.6875	23568								region	LAC	TIG-rv	5.548	35329
	region	FSU	TAO-rs	14.6875	23568								region	USA	DEG-rv	5.548	35329
	region	FSU	TAO-rs	14.6875	23967.5								region	USA	DEG-rv	5.548	35515.3
	region	EAF	TAO-rs	14.6875	23967.5								region	CAN	DEG-rv	5.548	35515.3
	region	EAF	TAO-rs	14.6875	23967.8								region	CAN	DEG-rv	5.548	35561.8
	region	WCA	TAO-rs	14.6875	23967.8								region	WEU	DEG-rv	5.548	35561.8
	region	WCA	TAO-rs	14.6875	23968.5								region	WEU	DEG-rv	5.548	35589.8
	region	SAF	TAO-rs	14.6875	23968.5								region	EEU	DEG-rv	5.548	35589.8
	region	SAF	TAO-rs	14.6875	23969								region	EEU	DEG-rv	5.548	35617.8
	region	CHN	TAO-rs	14.6875	23969								region	FSU	DEG-rv	5.548	35617.8
	region	CHN	TAO-rs	14.6875	23969.3								region	FSU	DEG-rv	5.548	35897.3
	region	PAS	TAO-rs	14.6875	23969.3								region	NAF	DEG-rv	5.548	35897.3
	region	PAS	TAO-rs	14.6875	23969.8								region	NAF	DEG-rv	5.548	35990.5
	region	LAC	TAO-rs	14.6875	23969.8								region	EAF	DEG-rv	5.548	35990.5
	region	LAC	TAO-rs	14.6875	24453.9								region	EAF	DEG-rv	5.548	36018.5
	region	USA	SHO-rs	15.1316	24453.9								region	WCA	DEG-rv	5.548	36018.5
	region	USA	SHO-rs	15.1316	24958.9								region	WCA	DEG-rv	5.548	36083.8
	region	CAN	SHO-rs	15.1316	24958.9								region	SAF	DEG-rv	5.548	36083.8
	region	CAN	SHO-rs	15.1316	24962.6								region	SAF	DEG-rv	5.548	36102.5
	region	WEU	SHO-rs	15.1316	24962.6								region	MEE	DEG-rv	5.548	36102.5
	region	WEU	SHO-rs	15.1316	24979.6								region	MEE	DEG-rv	5.548	36167.8
	region	EEU	SHO-rs	15.1316	24979.6								region	CHN	DEG-rv	5.548	36167.8
	region	EEU	SHO-rs	15.1316	24979.7								region	CHN	DEG-rv	5.548	36186.5
	region	FSU	SHO-rs	15.1316	24979.7								region	IND	DEG-rv	5.548	36186.5
	region	FSU	SHO-rs	15.1316	25057.8								region	IND	DEG-rv	5.548	36205.3
	region	NAF	SHO-rs	15.1316	25057.8								region	OSA	DEG-rv	5.548	36205.3
	region	NAF	SHO-rs	15.1316	25072.9								region	OSA	DEG-rv	5.548	36251.8
	region	EAF	SHO-rs	15.1316	25072.9								region	OCN	DEG-rv	5.548	36251.8
	region	EAF	SHO-rs	15.1316	25072.9								region	OCN	DEG-rv	5.548	36270.5
	region	WCA	SHO-rs	15.1316	25072.9								region	PAS	DEG-rv	5.548	36270.5
	region	WCA	SHO-rs	15.1316	25096.8								region	PAS	DEG-rv	5.548	36289.3
	region	SAF	SHO-rs	15.1316	25096.8								region	LAC	DEG-rv	5.548	36289.3
	region	SAF	SHO-rs	15.1316	25096.9								region	LAC	DEG-rv	5.548	36345.3
	region	MEE	SHO-rs	15.1316	25096.9								region	USA	SHG-rv	5.548	36345.3
	region	MEE	SHO-rs	15.1316	25106.6								region	USA	SHG-rv	5.548	36811
	region	CHN	SHO-rs	15.1316	25106.6								region	CAN	SHG-rv	5.548	36811
	region	CHN	SHO-rs	15.1316	25109.9								region	CAN	SHG-rv	5.548	36857.5
	region	OEA	SHO-rs	15.1316	25109.9								region	WEU	SHG-rv	5.548	36857.5
	region	OEA	SHO-rs	15.1316	25110								region	WEU	SHG-rv	5.548	36913.5
	region	OCN	SHO-rs	15.1316	25110								region	EEU	SHG-rv	5.548	36913.5
	region	OCN	SHO-rs	15.1316	25117.6								region	EEU	SHG-rv	5.548	36969.5
	region	PAS	SHO-rs	15.1316	25117.6								region	FSU	SHG-rv	5.548	36969.5
	region	PAS	SHO-rs	15.1316	25119.6								region	FSU	SHG-rv	5.548	37528.3
	region	LAC	SHO-rs	15.1316	25119.6								region	NAF	SHG-rv	5.548	37528.3
	region	LAC	SHO-rs	15.1316	25134.4								region	NAF	SHG-rv	5.548	37565.5
	region	USA	EHO-rs	17.319	25134.4								region	EAF	SHG-rv	5.548	37565.5
	region	USA	EHO-rs	17.319	25257.1								region	EAF	SHG-rv	5.548	37584.3
	region	CAN	EHO-rs	17.319	25257.1								region	WCA	SHG-rv	5.548	37584.3
	region	CAN	EHO-rs	17.319	25488.1								region	WCA	SHG-rv	5.548	37658.8
	region	WEU	EHO-rs	17.319	25488.1								region	SAF	SHG-rv	5.548	37658.8
	region	WEU	EHO-rs	17.319	25488.5								region	SAF	SHG-rv	5.548	37677.5
	region	EEU	EHO-rs	17.319	25488.5								region	MEE	SHG-rv	5.548	37677.5
	region	EEU	EHO-rs	17.319	25488.6								region	MEE	SHG-rv	5.548	37714.8
	region	FSU	EHO-rs	17.319	25488.6								region	CHN	SHG-rv	5.548	37714.8
	region	FSU	EHO-rs	17.319	25488.9								region	CHN	SHG-rv	5.548	37733.5
	region	MEE	EHO-rs	17.319	25488.9								region	OEA	SHG-rv	5.548	37733.5
	region	MEE	EHO-rs	17.319	25687								region	OEA	SHG-rv	5.548	37752.3
	region	CHN	EHO-rs	17.319	25687								region	IND	SHG-rv	5.548	37752.3
	region	CHN	EHO-rs	17.319	25693.4								region	IND	SHG-rv	5.548	37771
	region	OEA	EHO-rs	17.319	25693.4								region	OSA	SHG-rv	5.548	37771
	region	OEA	EHO-rs	17.319	25695								region	OSA	SHG-rv	5.548	37827
	region	IND	EHO-rs	17.319	25695								region	OCN	SHG-rv	5.548	37827
	region	IND	EHO-rs	17.319	25695.6								region	OCN	SHG-rv	5.548	37864.3
	region	LAC	EHO-rs	17.319	25695.6								region	PAS	SHG-rv	5.548	37864.3
	region	LAC	EHO-rs	17.319	25695.8								region	PAS	SHG-rv	5.548	37883
	region	USA	TAO-rs	17.319	25695.8								region	LAC	SHG-rv	5.548	37883
	region	USA	TAO-rs	17.319	25703.2								region	LAC	SHG-rv	5.548	37920.3
	region	CAN	TAO-rs	17.319	25703.2								region	USA	CMG-rs	6.7576	37920.3
	region	CAN	TAO-rs	17.319	26720.3								region	USA	CMG-rs	6.7576	37995.8
	region	WEU	TAO-rs	17.319	26720.3								region	CAN	CMG-rs	6.7576	37995.8
	region	WEU	TAO-rs	17.319	26720.3								region	CAN	CMG-rs	6.7576	38020.9
	region	EEU	TAO-rs	17.319	26720.3								region	WEU	CMG-rs	6.7576	38020.9
	region	EEU	TAO-rs	17.319	26720.4								region	WEU	CMG-rs	6.7576	38046.1
	region	FSU	TAO-rs	17.319	26720.4								region	EEU	CMG-rs	6.7576	38046.1
	region	FSU	TAO-rs	17.319	27020								region	EEU	CMG-rs	6.7576	38054.4
	region	EAF	TAO-rs	17.319	27020								region	FSU	CMG-rs	6.7576	38054.4
	region	EAF	TAO-rs	17.319	27020.2								region	FSU	CMG-rs	6.7576	38138.3
	region	WCA	TAO-rs	17.319	27020.2								region	NAF	CMG-rs	6.7576	38138.3
	region	WCA	TAO-rs	17.319	27020.7								region	NAF	CMG-rs	6.7576	38155.1
	region	SAF	TAO-rs	17.319	27020.7								region	EAF	CMG-rs	6.7576	38155.1
	region	SAF	TAO-rs	17.319	27021.1								region	EAF	CMG-rs	6.7576	38163.4
	region	CHN	TAO-rs	17.319	27021.1								region	WCA	CMG-rs	6.7576	38163.4
	region	CHN	TAO-rs	17.319	27021.2								region	WCA	CMG-rs	6.7576	38171.8
	region	PAS	TAO-rs	17.319	27021.2								region	SAF	CMG-rs	6.7576	38171.8
	region	PAS	TAO-rs	17.319	27021.6								region	SAF	CMG-rs	6.7576	38180.2
	region	LAC	TAO-rs	17.319	27021.6								region	MEE	CMG-rs	6.7576	38180.2
	region	LAC	TAO-rs	17.319	27566.3								region	MEE	CMG-rs	6.7576	38188.5
	region	USA	SHO-rs	18.0921	27566.3								region	CHN	CMG-rs	6.7576	38188.5
	region	USA	SHO-rs	18.0921	28702.6								region	CHN	CMG-rs	6.7576	38255.6
	region	CAN	SHO-rs	18.0921	28702.6								region	OEA	CMG-rs	6.7576	38255.6
	region	CAN	SHO-rs	18.0921	28704.5								region	OEA	CMG-rs	6.7576	38257.3
	region	WEU	SHO-rs	18.0921	28704.5								region	IND	CMG-rs	6.7576	38257.3
	region	WEU	SHO-rs	18.0921	28772.5								region	IND	CMG-rs	6.7576	38282.4
	region	EEU	SHO-rs	18.0921	28772.5								region	OSA	CMG-rs	6.7576	38282.4
	region	EEU	SHO-rs	18.0921	28772.8								region	OSA	CMG-rs	6.7576	38287.5
	region	FSU	SHO-rs	18.0921	28772.8								region	JPN	CMG-rs	6.7576	38287.5
	region	FSU	SHO-rs	18.0921	28929.1								region	JPN	CMG-rs	6.7576	38292.5
	region	NAF	SHO-rs	18.0921	28929.1								region	OCN	CMG-rs	6.7576	38292.5
	region	NAF	SHO-rs	18.0921	28981.7								region	OCN	CMG-rs	6.7576	38309.3
	region	EAF	SHO-rs	18.0921	28981.7								region	PAS	CMG-rs	6.7576	38309.3
	region	EAF	SHO-rs	18.0921	28981.7								region	PAS	CMG-rs	6.7576	38314.3
	region	WCA	SHO-rs	18.0921	28981.7								region	LAC	CMG-rs	6.7576	38314.3
	region	WCA	SHO-rs	18.0921	29029.7								region	LAC	CMG-rs	6.7576	38339.5
	region	SAF	SHO-rs	18.0921	29029.7								region	USA	TIG-rs	6.7576	38339.5
	region	SAF	SHO-rs	18.0921	29029.7								region	USA	TIG-rs	6.7576	38403.2
	region	MEE	SHO-rs	18.0921	29029.7								region	CAN	TIG-rs	6.7576	38403.2
	region	MEE	SHO-rs	18.0921	29044.3								region	CAN	TIG-rs	6.7576	38440.1
	region	CHN	SHO-rs	18.0921	29044.3								region	WEU	TIG-rs	6.7576	38440.1
	region	CHN	SHO-rs	18.0921	29053.9								region	WEU	TIG-rs	6.7576	38448.5
	region	OEA	SHO-rs	18.0921	29053.9								region	EEU	TIG-rs	6.7576	38448.5
	region	OEA	SHO-rs	18.0921	29054.1								region	EEU	TIG-rs	6.7576	38456.8
	region	OCN	SHO-rs	18.0921	29054.1								region	FSU	TIG-rs	6.7576	38456.8
	region	OCN	SHO-rs	18.0921	29073								region	FSU	TIG-rs	6.7576	38515.5
	region	PAS	SHO-rs	18.0921	29073								region	NAF	TIG-rs	6.7576	38515.5
	region	PAS	SHO-rs	18.0921	29077.1								region	NAF	TIG-rs	6.7576	38532.3
	region	LAC	SHO-rs	18.0921	29077.1								region	EAF	TIG-rs	6.7576	38532.3
	region	LAC	SHO-rs	18.0921	29116.6								region	EAF	TIG-rs	6.7576	38540.7
	region	USA	EHO-rs	20.6085	29116.6								region	WCA	TIG-rs	6.7576	38540.7
	region	USA	EHO-rs	20.6085	29280.2								region	WCA	TIG-rs	6.7576	38565.8
	region	CAN	EHO-rs	20.6085	29280.2								region	SAF	TIG-rs	6.7576	38565.8
	region	CAN	EHO-rs	20.6085	29372.6								region	SAF	TIG-rs	6.7576	38574.2
	region	WEU	EHO-rs	20.6085	29372.6								region	MEE	TIG-rs	6.7576	38574.2
	region	WEU	EHO-rs	20.6085	29373.2								region	MEE	TIG-rs	6.7576	38607.7
	region	EEU	EHO-rs	20.6085	29373.2								region	CHN	TIG-rs	6.7576	38607.7
	region	EEU	EHO-rs	20.6085	29373.2								region	CHN	TIG-rs	6.7576	38616.1
	region	FSU	EHO-rs	20.6085	29373.2								region	OEA	TIG-rs	6.7576	38616.1
	region	FSU	EHO-rs	20.6085	29373.6								region	OEA	TIG-rs	6.7576	38624.5
	region	NAF	EHO-rs	20.6085	29373.6								region	IND	TIG-rs	6.7576	38624.5
	region	NAF	EHO-rs	20.6085	29373.9								region	IND	TIG-rs	6.7576	38632.8
	region	MEE	EHO-rs	20.6085	29373.9								region	OSA	TIG-rs	6.7576	38632.8
	region	MEE	EHO-rs	20.6085	29506								region	OSA	TIG-rs	6.7576	38649.6
	region	CHN	EHO-rs	20.6085	29506								region	OCN	TIG-rs	6.7576	38649.6
	region	CHN	EHO-rs	20.6085	29513.3								region	OCN	TIG-rs	6.7576	38658
	region	OEA	EHO-rs	20.6085	29513.3								region	PAS	TIG-rs	6.7576	38658
	region	OEA	EHO-rs	20.6085	29515								region	PAS	TIG-rs	6.7576	38674.8
	region	IND	EHO-rs	20.6085	29515								region	LAC	TIG-rs	6.7576	38674.8
	region	IND	EHO-rs	20.6085	29515.4								region	LAC	TIG-rs	6.7576	38699.9
	region	LAC	EHO-rs	20.6085	29515.4								region	USA	DEG-rs	6.7576	38699.9
	region	LAC	EHO-rs	20.6085	29515.6								region	USA	DEG-rs	6.7576	38775.4
	region	USA	TAO-rs	20.6085	29515.6								region	CAN	DEG-rs	6.7576	38775.4
	region	USA	TAO-rs	20.6085	29525.3								region	CAN	DEG-rs	6.7576	38792.2
	region	CAN	TAO-rs	20.6085	29525.3								region	WEU	DEG-rs	6.7576	38792.2
	region	CAN	TAO-rs	20.6085	29932.2								region	WEU	DEG-rs	6.7576	38800.5
	region	WEU	TAO-rs	20.6085	29932.2								region	EEU	DEG-rs	6.7576	38800.5
	region	WEU	TAO-rs	20.6085	29932.3								region	EEU	DEG-rs	6.7576	38808.9
	region	EEU	TAO-rs	20.6085	29932.3								region	FSU	DEG-rs	6.7576	38808.9
	region	EEU	TAO-rs	20.6085	29932.3								region	FSU	DEG-rs	6.7576	38892.7
	region	FSU	TAO-rs	20.6085	29932.3								region	NAF	DEG-rs	6.7576	38892.7
	region	FSU	TAO-rs	20.6085	30232								region	NAF	DEG-rs	6.7576	38917.9
	region	EAF	TAO-rs	20.6085	30232								region	EAF	DEG-rs	6.7576	38917.9
	region	EAF	TAO-rs	20.6085	30232.1								region	EAF	DEG-rs	6.7576	38926.3
	region	WCA	TAO-rs	20.6085	30232.1								region	WCA	DEG-rs	6.7576	38926.3
	region	WCA	TAO-rs	20.6085	30232.6								region	WCA	DEG-rs	6.7576	38951.4
	region	SAF	TAO-rs	20.6085	30232.6								region	SAF	DEG-rs	6.7576	38951.4
	region	SAF	TAO-rs	20.6085	30233								region	SAF	DEG-rs	6.7576	38959.8
	region	CHN	TAO-rs	20.6085	30233								region	MEE	DEG-rs	6.7576	38959.8
	region	CHN	TAO-rs	20.6085	30233.2								region	MEE	DEG-rs	6.7576	38985
	region	PAS	TAO-rs	20.6085	30233.2								region	CHN	DEG-rs	6.7576	38985
	region	PAS	TAO-rs	20.6085	30233.4								region	CHN	DEG-rs	6.7576	38993.3
	region	LAC	TAO-rs	20.6085	30233.4								region	OEA	DEG-rs	6.7576	38993.3
	region	LAC	TAO-rs	20.6085	30505.8								region	OEA	DEG-rs	6.7576	38995
	region	USA	SHO-rs	22.0395	30505.8								region	IND	DEG-rs	6.7576	38995
	region	USA	SHO-rs	22.0395	31073.9								region	IND	DEG-rs	6.7576	39003.4
	region	CAN	SHO-rs	22.0395	31073.9								region	OSA	DEG-rs	6.7576	39003.4
	region	CAN	SHO-rs	22.0395	31087.7								region	OSA	DEG-rs	6.7576	39020.1
	region	WEU	SHO-rs	22.0395	31087.7								region	OCN	DEG-rs	6.7576	39020.1
	region	WEU	SHO-rs	22.0395	31104.7								region	OCN	DEG-rs	6.7576	39028.5
	region	EEU	SHO-rs	22.0395	31104.7								region	PAS	DEG-rs	6.7576	39028.5
	region	EEU	SHO-rs	22.0395	31104.8								region	PAS	DEG-rs	6.7576	39036.9
	region	FSU	SHO-rs	22.0395	31104.8								region	LAC	DEG-rs	6.7576	39036.9
	region	FSU	SHO-rs	22.0395	31222								region	LAC	DEG-rs	6.7576	39062
	region	EAF	SHO-rs	22.0395	31222								region	USA	SHG-rs	6.7576	39062
	region	EAF	SHO-rs	22.0395	31222								region	USA	SHG-rs	6.7576	39246.4
	region	WCA	SHO-rs	22.0395	31222								region	CAN	SHG-rs	6.7576	39246.4
	region	WCA	SHO-rs	22.0395	31258								region	CAN	SHG-rs	6.7576	39296.7
	region	SAF	SHO-rs	22.0395	31258								region	WEU	SHG-rs	6.7576	39296.7
	region	SAF	SHO-rs	22.0395	31258								region	WEU	SHG-rs	6.7576	39379
	region	MEE	SHO-rs	22.0395	31258								region	EEU	SHG-rs	6.7576	39379
	region	MEE	SHO-rs	22.0395	31279.9								region	EEU	SHG-rs	6.7576	39404.1
	region	CHN	SHO-rs	22.0395	31279.9								region	FSU	SHG-rs	6.7576	39404.1
	region	CHN	SHO-rs	22.0395	31284.2								region	FSU	SHG-rs	6.7576	39647.2
	region	OEA	SHO-rs	22.0395	31284.2								region	NAF	SHG-rs	6.7576	39647.2
	region	OEA	SHO-rs	22.0395	31284.3								region	NAF	SHG-rs	6.7576	39744.3
	region	OCN	SHO-rs	22.0395	31284.3								region	EAF	SHG-rs	6.7576	39744.3
	region	OCN	SHO-rs	22.0395	31292.8								region	EAF	SHG-rs	6.7576	39752.6
	region	PAS	SHO-rs	22.0395	31292.8								region	WCA	SHG-rs	6.7576	39752.6
	region	PAS	SHO-rs	22.0395	31296.6								region	WCA	SHG-rs	6.7576	39786.2
	region	LAC	SHO-rs	22.0395	31296.6								region	SAF	SHG-rs	6.7576	39786.2
	region	LAC	SHO-rs	22.0395	31341								region	SAF	SHG-rs	6.7576	39884.4
	region	USA	EHO-rs	24.5559	31341								region	MEE	SHG-rs	6.7576	39884.4
	region	USA	EHO-rs	24.5559	31504.6								region	MEE	SHG-rs	6.7576	39901.2
	region	CAN	EHO-rs	24.5559	31504.6								region	CHN	SHG-rs	6.7576	39901.2
	region	CAN	EHO-rs	24.5559	31597								region	CHN	SHG-rs	6.7576	40187
	region	WEU	EHO-rs	24.5559	31597								region	OEA	SHG-rs	6.7576	40187
	region	WEU	EHO-rs	24.5559	31597.7								region	OEA	SHG-rs	6.7576	40195.3
	region	EEU	EHO-rs	24.5559	31597.7								region	IND	SHG-rs	6.7576	40195.3
	region	EEU	EHO-rs	24.5559	31597.7								region	IND	SHG-rs	6.7576	40203.7
	region	FSU	EHO-rs	24.5559	31597.7								region	OSA	SHG-rs	6.7576	40203.7
	region	FSU	EHO-rs	24.5559	31598.1								region	OSA	SHG-rs	6.7576	40228.9
	region	NAF	EHO-rs	24.5559	31598.1								region	OCN	SHG-rs	6.7576	40228.9
	region	NAF	EHO-rs	24.5559	31598.6								region	OCN	SHG-rs	6.7576	40289.3
	region	MEE	EHO-rs	24.5559	31598.6								region	PAS	SHG-rs	6.7576	40289.3
	region	MEE	EHO-rs	24.5559	31730.7								region	PAS	SHG-rs	6.7576	40297.7
	region	CHN	EHO-rs	24.5559	31730.7								region	LAC	SHG-rs	6.7576	40297.7
	region	CHN	EHO-rs	24.5559	31738.1								region	LAC	SHG-rs	6.7576	40716.6
	region	OEA	EHO-rs	24.5559	31738.1								region	USA	CMG-rs	8.14864	40716.6
	region	OEA	EHO-rs	24.5559	31740.2								region	USA	CMG-rs	8.14864	40792.1
	region	IND	EHO-rs	24.5559	31740.2								region	CAN	CMG-rs	8.14864	40792.1
	region	IND	EHO-rs	24.5559	31740.9								region	CAN	CMG-rs	8.14864	40817.2
	region	LAC	EHO-rs	24.5559	31740.9								region	WEU	CMG-rs	8.14864	40817.2
	region	LAC	EHO-rs	24.5559	31741								region	WEU	CMG-rs	8.14864	40842.4
	region	USA	TAO-rs	24.5559	31741								region	EEU	CMG-rs	8.14864	40842.4
	region	USA	TAO-rs	24.5559	31750.8								region	EEU	CMG-rs	8.14864	40850.8
	region	CAN	TAO-rs	24.5559	31750.8								region	FSU	CMG-rs	8.14864	40850.8
	region	CAN	TAO-rs	24.5559	32157.6								region	FSU	CMG-rs	8.14864	40934.6
	region	WEU	TAO-rs	24.5559	32157.6								region	NAF	CMG-rs	8.14864	40934.6
	region	WEU	TAO-rs	24.5559	32157.7								region	NAF	CMG-rs	8.14864	40951.4
	region	EEU	TAO-rs	24.5559	32157.7								region	EAF	CMG-rs	8.14864	40951.4
	region	EEU	TAO-rs	24.5559	32157.8								region	EAF	CMG-rs	8.14864	40959.8
	region	FSU	TAO-rs	24.5559	32157.8								region	WCA	CMG-rs	8.14864	40959.8
	region	FSU	TAO-rs	24.5559	32457.4								region	WCA	CMG-rs	8.14864	40968.1
	region	EAF	TAO-rs	24.5559	32457.4								region	SAF	CMG-rs	8.14864	40968.1
	region	EAF	TAO-rs	24.5559	32457.6								region	SAF	CMG-rs	8.14864	40976.5
	region	WCA	TAO-rs	24.5559	32457.6								region	MEE	CMG-rs	8.14864	40976.5
	region	WCA	TAO-rs	24.5559	32458.1								region	MEE	CMG-rs	8.14864	40984.9
	region	SAF	TAO-rs	24.5559	32458.1								region	CHN	CMG-rs	8.14864	40984.9
	region	SAF	TAO-rs	24.5559	32458.5								region	CHN	CMG-rs	8.14864	41051.9
	region	CHN	TAO-rs	24.5559	32458.5								region	OEA	CMG-rs	8.14864	41051.9
	region	CHN	TAO-rs	24.5559	32458.7								region	OEA	CMG-rs	8.14864	41053.6
	region	PAS	TAO-rs	24.5559	32458.7								region	IND	CMG-rs	8.14864	41053.6
	region	PAS	TAO-rs	24.5559	32459								region	IND	CMG-rs	8.14864	41078.7
	region	LAC	TAO-rs	24.5559	32459								region	OSA	CMG-rs	8.14864	41078.7
	region	LAC	TAO-rs	24.5559	32731.3								region	OSA	CMG-rs	8.14864	41083.8
	region	USA	SHO-rs	26.9737	32731.3								region	JPN	CMG-rs	8.14864	41083.8
	region	USA	SHO-rs	26.9737	33488.9								region	JPN	CMG-rs	8.14864	41088.8
	region	CAN	SHO-rs	26.9737	33488.9								region	OCN	CMG-rs	8.14864	41088.8
	region	CAN	SHO-rs	26.9737	33494.4								region	OCN	CMG-rs	8.14864	41105.6
	region	WEU	SHO-rs	26.9737	33494.4								region	PAS	CMG-rs	8.14864	41105.6
	region	WEU	SHO-rs	26.9737	33519.9								region	PAS	CMG-rs	8.14864	41110.6
	region	EEU	SHO-rs	26.9737	33519.9								region	LAC	CMG-rs	8.14864	41110.6
	region	EEU	SHO-rs	26.9737	33520								region	LAC	CMG-rs	8.14864	41135.8
	region	FSU	SHO-rs	26.9737	33520								region	USA	TIG-rs	8.14864	41135.8
	region	FSU	SHO-rs	26.9737	33637.2								region	USA	TIG-rs	8.14864	41199.5
	region	NAF	SHO-rs	26.9737	33637.2								region	CAN	TIG-rs	8.14864	41199.5
	region	NAF	SHO-rs	26.9737	33648.5								region	CAN	TIG-rs	8.14864	41236.4
	region	EAF	SHO-rs	26.9737	33648.5								region	WEU	TIG-rs	8.14864	41236.4
	region	EAF	SHO-rs	26.9737	33648.5								region	WEU	TIG-rs	8.14864	41244.8
	region	WCA	SHO-rs	26.9737	33648.5								region	EEU	TIG-rs	8.14864	41244.8
	region	WCA	SHO-rs	26.9737	33684.4								region	EEU	TIG-rs	8.14864	41253.2
	region	SAF	SHO-rs	26.9737	33684.4								region	FSU	TIG-rs	8.14864	41253.2
	region	SAF	SHO-rs	26.9737	33684.5								region	FSU	TIG-rs	8.14864	41311.8
	region	MEE	SHO-rs	26.9737	33684.5								region	NAF	TIG-rs	8.14864	41311.8
	region	MEE	SHO-rs	26.9737	33699								region	NAF	TIG-rs	8.14864	41328.6
	region	CHN	SHO-rs	26.9737	33699								region	EAF	TIG-rs	8.14864	41328.6
	region	CHN	SHO-rs	26.9737	33704.1								region	EAF	TIG-rs	8.14864	41337
	region	OEA	SHO-rs	26.9737	33704.1								region	WCA	TIG-rs	8.14864	41337
	region	OEA	SHO-rs	26.9737	33704.2								region	WCA	TIG-rs	8.14864	41362.2
	region	OCN	SHO-rs	26.9737	33704.2								region	SAF	TIG-rs	8.14864	41362.2
	region	OCN	SHO-rs	26.9737	33712.7								region	SAF	TIG-rs	8.14864	41370.5
	region	PAS	SHO-rs	26.9737	33712.7								region	MEE	TIG-rs	8.14864	41370.5
	region	PAS	SHO-rs	26.9737	33715								region	MEE	TIG-rs	8.14864	41404
	region	LAC	SHO-rs	26.9737	33715								region	CHN	TIG-rs	8.14864	41404
	region	LAC	SHO-rs	26.9737	33737.2								region	CHN	TIG-rs	8.14864	41412.4
	region	USA	EHO-rs	28.8322	33737.2								region	OEA	TIG-rs	8.14864	41412.4
	region	USA	EHO-rs	28.8322	34105.3								region	OEA	TIG-rs	8.14864	41420.8
	region	CAN	EHO-rs	28.8322	34105.3								region	IND	TIG-rs	8.14864	41420.8
	region	CAN	EHO-rs	28.8322	34151.5								region	IND	TIG-rs	8.14864	41429.2
	region	WEU	EHO-rs	28.8322	34151.5								region	OSA	TIG-rs	8.14864	41429.2
	region	WEU	EHO-rs	28.8322	34154.1								region	OSA	TIG-rs	8.14864	41445.9
	region	EEU	EHO-rs	28.8322	34154.1								region	OCN	TIG-rs	8.14864	41445.9
	region	EEU	EHO-rs	28.8322	34154.2								region	OCN	TIG-rs	8.14864	41454.3
	region	FSU	EHO-rs	28.8322	34154.2								region	PAS	TIG-rs	8.14864	41454.3
	region	FSU	EHO-rs	28.8322	34154.9								region	PAS	TIG-rs	8.14864	41471.1
	region	NAF	EHO-rs	28.8322	34154.9								region	LAC	TIG-rs	8.14864	41471.1
	region	NAF	EHO-rs	28.8322	34156.9								region	LAC	TIG-rs	8.14864	41496.3
	region	MEE	EHO-rs	28.8322	34156.9								region	USA	DEG-rs	8.14864	41496.3
	region	MEE	EHO-rs	28.8322	34355								region	USA	DEG-rs	8.14864	41571.7
	region	CHN	EHO-rs	28.8322	34355								region	CAN	DEG-rs	8.14864	41571.7
	region	CHN	EHO-rs	28.8322	34376.1								region	CAN	DEG-rs	8.14864	41588.5
	region	OEA	EHO-rs	28.8322	34376.1								region	WEU	DEG-rs	8.14864	41588.5
	region	OEA	EHO-rs	28.8322	34381.4								region	WEU	DEG-rs	8.14864	41596.9
	region	IND	EHO-rs	28.8322	34381.4								region	EEU	DEG-rs	8.14864	41596.9
	region	IND	EHO-rs	28.8322	34382.9								region	EEU	DEG-rs	8.14864	41605.2
	region	LAC	EHO-rs	28.8322	34382.9								region	FSU	DEG-rs	8.14864	41605.2
	region	LAC	EHO-rs	28.8322	34383.2								region	FSU	DEG-rs	8.14864	41689.1
	region	USA	TAO-rs	28.8322	34383.2								region	NAF	DEG-rs	8.14864	41689.1
	region	USA	TAO-rs	28.8322	34405.2								region	NAF	DEG-rs	8.14864	41714.2
	region	CAN	TAO-rs	28.8322	34405.2								region	EAF	DEG-rs	8.14864	41714.2
	region	CAN	TAO-rs	28.8322	34608.7								region	EAF	DEG-rs	8.14864	41722.6
	region	WEU	TAO-rs	28.8322	34608.7								region	WCA	DEG-rs	8.14864	41722.6
	region	WEU	TAO-rs	28.8322	34609.2								region	WCA	DEG-rs	8.14864	41747.8
	region	EEU	TAO-rs	28.8322	34609.2								region	SAF	DEG-rs	8.14864	41747.8
	region	EEU	TAO-rs	28.8322	34609.4								region	SAF	DEG-rs	8.14864	41756.1
	region	FSU	TAO-rs	28.8322	34609.4								region	MEE	DEG-rs	8.14864	41756.1
	region	FSU	TAO-rs	28.8322	35208.7								region	MEE	DEG-rs	8.14864	41781.3
	region	EAF	TAO-rs	28.8322	35208.7								region	CHN	DEG-rs	8.14864	41781.3
	region	EAF	TAO-rs	28.8322	35209.2								region	CHN	DEG-rs	8.14864	41789.7
	region	WCA	TAO-rs	28.8322	35209.2								region	OEA	DEG-rs	8.14864	41789.7
	region	WCA	TAO-rs	28.8322	35210.2								region	OEA	DEG-rs	8.14864	41791.3
	region	SAF	TAO-rs	28.8322	35210.2								region	IND	DEG-rs	8.14864	41791.3
	region	SAF	TAO-rs	28.8322	35211								region	IND	DEG-rs	8.14864	41799.7
	region	CHN	TAO-rs	28.8322	35211								region	OSA	DEG-rs	8.14864	41799.7
	region	CHN	TAO-rs	28.8322	35211.3								region	OSA	DEG-rs	8.14864	41816.5
	region	PAS	TAO-rs	28.8322	35211.3								region	OCN	DEG-rs	8.14864	41816.5
	region	PAS	TAO-rs	28.8322	35212.1								region	OCN	DEG-rs	8.14864	41824.8
	region	LAC	TAO-rs	28.8322	35212.1								region	PAS	DEG-rs	8.14864	41824.8
	region	LAC	TAO-rs	28.8322	35938.2								region	PAS	DEG-rs	8.14864	41833.2
	region	USA	SHO-rs	32.8947	35938.2								region	LAC	DEG-rs	8.14864	41833.2
	region	USA	SHO-rs	32.8947	36695.8								region	LAC	DEG-rs	8.14864	41858.4
	region	CAN	SHO-rs	32.8947	36695.8								region	USA	SHG-rs	8.14864	41858.4
	region	CAN	SHO-rs	32.8947	36701.3								region	USA	SHG-rs	8.14864	42042.8
	region	WEU	SHO-rs	32.8947	36701.3								region	CAN	SHG-rs	8.14864	42042.8
	region	WEU	SHO-rs	32.8947	36726.8								region	CAN	SHG-rs	8.14864	42093
	region	EEU	SHO-rs	32.8947	36726.8								region	WEU	SHG-rs	8.14864	42093
	region	EEU	SHO-rs	32.8947	36727								region	WEU	SHG-rs	8.14864	42175.3
	region	FSU	SHO-rs	32.8947	36727								region	EEU	SHG-rs	8.14864	42175.3
	region	FSU	SHO-rs	32.8947	36844.1								region	EEU	SHG-rs	8.14864	42200.5
	region	NAF	SHO-rs	32.8947	36844.1								region	FSU	SHG-rs	8.14864	42200.5
	region	NAF	SHO-rs	32.8947	36866.7								region	FSU	SHG-rs	8.14864	42443.6
	region	EAF	SHO-rs	32.8947	36866.7								region	NAF	SHG-rs	8.14864	42443.6
	region	EAF	SHO-rs	32.8947	36866.7								region	NAF	SHG-rs	8.14864	42540.6
	region	WCA	SHO-rs	32.8947	36866.7								region	EAF	SHG-rs	8.14864	42540.6
	region	WCA	SHO-rs	32.8947	36902.7								region	EAF	SHG-rs	8.14864	42549
	region	SAF	SHO-rs	32.8947	36902.7								region	WCA	SHG-rs	8.14864	42549
	region	SAF	SHO-rs	32.8947	36902.7								region	WCA	SHG-rs	8.14864	42582.5
	region	MEE	SHO-rs	32.8947	36902.7								region	SAF	SHG-rs	8.14864	42582.5
	region	MEE	SHO-rs	32.8947	36917.3								region	SAF	SHG-rs	8.14864	42680.7
	region	CHN	SHO-rs	32.8947	36917.3								region	MEE	SHG-rs	8.14864	42680.7
	region	CHN	SHO-rs	32.8947	36922.3								region	MEE	SHG-rs	8.14864	42697.5
	region	OEA	SHO-rs	32.8947	36922.3								region	CHN	SHG-rs	8.14864	42697.5
	region	OEA	SHO-rs	32.8947	36922.4								region	CHN	SHG-rs	8.14864	42983.3
	region	OCN	SHO-rs	32.8947	36922.4								region	OEA	SHG-rs	8.14864	42983.3
	region	OCN	SHO-rs	32.8947	36933.8								region	OEA	SHG-rs	8.14864	42991.7
	region	PAS	SHO-rs	32.8947	36933.8								region	IND	SHG-rs	8.14864	42991.7
	region	PAS	SHO-rs	32.8947	36936.8								region	IND	SHG-rs	8.14864	43000
	region	LAC	SHO-rs	32.8947	36936.8								region	OSA	SHG-rs	8.14864	43000
	region	LAC	SHO-rs	32.8947	36959.1								region	OSA	SHG-rs	8.14864	43025.2
	region	USA	SHO-rs	39.3092	36959.1								region	OCN	SHG-rs	8.14864	43025.2
	region	USA	SHO-rs	39.3092	38663.6								region	OCN	SHG-rs	8.14864	43085.7
	region	CAN	SHO-rs	39.3092	38663.6								region	PAS	SHG-rs	8.14864	43085.7
	region	CAN	SHO-rs	39.3092	38666.3								region	PAS	SHG-rs	8.14864	43094
	region	WEU	SHO-rs	39.3092	38666.3								region	LAC	SHG-rs	8.14864	43094
	region	WEU	SHO-rs	39.3092	38768.3								region	LAC	SHG-rs	8.14864	43513
	region	EEU	SHO-rs	39.3092	38768.3								region	USA	CMG-rs	9.67878	43513
	region	EEU	SHO-rs	39.3092	38768.8								region	USA	CMG-rs	9.67878	43580
	region	FSU	SHO-rs	39.3092	38768.8								region	CAN	CMG-rs	9.67878	43580
	region	FSU	SHO-rs	39.3092	39003.2								region	CAN	CMG-rs	9.67878	43602.4
	region	NAF	SHO-rs	39.3092	39003.2								region	WEU	CMG-rs	9.67878	43602.4
	region	NAF	SHO-rs	39.3092	39082.2								region	WEU	CMG-rs	9.67878	43624.8
	region	EAF	SHO-rs	39.3092	39082.2								region	EEU	CMG-rs	9.67878	43624.8
	region	EAF	SHO-rs	39.3092	39082.2								region	EEU	CMG-rs	9.67878	43632.2
	region	WCA	SHO-rs	39.3092	39082.2								region	FSU	CMG-rs	9.67878	43632.2
	region	WCA	SHO-rs	39.3092	39154.1								region	FSU	CMG-rs	9.67878	43706.7
	region	SAF	SHO-rs	39.3092	39154.1								region	NAF	CMG-rs	9.67878	43706.7
	region	SAF	SHO-rs	39.3092	39154.2								region	NAF	CMG-rs	9.67878	43721.6
	region	MEE	SHO-rs	39.3092	39154.2								region	EAF	CMG-rs	9.67878	43721.6
	region	MEE	SHO-rs	39.3092	39176.1								region	EAF	CMG-rs	9.67878	43729.1
	region	CHN	SHO-rs	39.3092	39176.1								region	WCA	CMG-rs	9.67878	43729.1
	region	CHN	SHO-rs	39.3092	39190.5								region	WCA	CMG-rs	9.67878	43736.5
	region	OEA	SHO-rs	39.3092	39190.5								region	SAF	CMG-rs	9.67878	43736.5
	region	OEA	SHO-rs	39.3092	39190.7								region	SAF	CMG-rs	9.67878	43744
	region	OCN	SHO-rs	39.3092	39190.7								region	MEE	CMG-rs	9.67878	43744
	region	OCN	SHO-rs	39.3092	39219.2								region	MEE	CMG-rs	9.67878	43751.4
	region	PAS	SHO-rs	39.3092	39219.2								region	CHN	CMG-rs	9.67878	43751.4
	region	PAS	SHO-rs	39.3092	39225.2								region	CHN	CMG-rs	9.67878	43811
	region	LAC	SHO-rs	39.3092	39225.2								region	OEA	CMG-rs	9.67878	43811
	region	LAC	SHO-rs	39.3092	39284.5								region	OEA	CMG-rs	9.67878	43812.5
													region	IND	CMG-rs	9.67878	43812.5
													region	IND	CMG-rs	9.67878	43834.8
													region	OSA	CMG-rs	9.67878	43834.8
													region	OSA	CMG-rs	9.67878	43839.3
													region	JPN	CMG-rs	9.67878	43839.3
													region	JPN	CMG-rs	9.67878	43843.8
													region	OCN	CMG-rs	9.67878	43843.8
													region	OCN	CMG-rs	9.67878	43858.7
													region	PAS	CMG-rs	9.67878	43858.7
													region	PAS	CMG-rs	9.67878	43863.2
													region	LAC	CMG-rs	9.67878	43863.2
													region	LAC	CMG-rs	9.67878	43885.6
													region	USA	TIG-rs	9.67878	43885.6
													region	USA	TIG-rs	9.67878	43942.2
													region	CAN	TIG-rs	9.67878	43942.2
													region	CAN	TIG-rs	9.67878	43975
													region	WEU	TIG-rs	9.67878	43975
													region	WEU	TIG-rs	9.67878	43982.4
													region	EEU	TIG-rs	9.67878	43982.4
													region	EEU	TIG-rs	9.67878	43989.9
													region	FSU	TIG-rs	9.67878	43989.9
													region	FSU	TIG-rs	9.67878	44042
													region	NAF	TIG-rs	9.67878	44042
													region	NAF	TIG-rs	9.67878	44057
													region	EAF	TIG-rs	9.67878	44057
													region	EAF	TIG-rs	9.67878	44064.4
													region	WCA	TIG-rs	9.67878	44064.4
													region	WCA	TIG-rs	9.67878	44086.8
													region	SAF	TIG-rs	9.67878	44086.8
													region	SAF	TIG-rs	9.67878	44094.2
													region	MEE	TIG-rs	9.67878	44094.2
													region	MEE	TIG-rs	9.67878	44124
													region	CHN	TIG-rs	9.67878	44124
													region	CHN	TIG-rs	9.67878	44131.4
													region	OEA	TIG-rs	9.67878	44131.4
													region	OEA	TIG-rs	9.67878	44138.9
													region	IND	TIG-rs	9.67878	44138.9
													region	IND	TIG-rs	9.67878	44146.3
													region	OSA	TIG-rs	9.67878	44146.3
													region	OSA	TIG-rs	9.67878	44161.2
													region	OCN	TIG-rs	9.67878	44161.2
													region	OCN	TIG-rs	9.67878	44168.7
													region	PAS	TIG-rs	9.67878	44168.7
													region	PAS	TIG-rs	9.67878	44183.6
													region	LAC	TIG-rs	9.67878	44183.6
													region	LAC	TIG-rs	9.67878	44206
													region	USA	DEG-rs	9.67878	44206
													region	USA	DEG-rs	9.67878	44273
													region	CAN	DEG-rs	9.67878	44273
													region	CAN	DEG-rs	9.67878	44288
													region	WEU	DEG-rs	9.67878	44288
													region	WEU	DEG-rs	9.67878	44295.4
													region	EEU	DEG-rs	9.67878	44295.4
													region	EEU	DEG-rs	9.67878	44302.8
													region	FSU	DEG-rs	9.67878	44302.8
													region	FSU	DEG-rs	9.67878	44377.4
													region	NAF	DEG-rs	9.67878	44377.4
													region	NAF	DEG-rs	9.67878	44399.7
													region	EAF	DEG-rs	9.67878	44399.7
													region	EAF	DEG-rs	9.67878	44407.2
													region	WCA	DEG-rs	9.67878	44407.2
													region	WCA	DEG-rs	9.67878	44429.5
													region	SAF	DEG-rs	9.67878	44429.5
													region	SAF	DEG-rs	9.67878	44437
													region	MEE	DEG-rs	9.67878	44437
													region	MEE	DEG-rs	9.67878	44459.3
													region	CHN	DEG-rs	9.67878	44459.3
													region	CHN	DEG-rs	9.67878	44466.8
													region	OEA	DEG-rs	9.67878	44466.8
													region	OEA	DEG-rs	9.67878	44468.2
													region	IND	DEG-rs	9.67878	44468.2
													region	IND	DEG-rs	9.67878	44475.7
													region	OSA	DEG-rs	9.67878	44475.7
													region	OSA	DEG-rs	9.67878	44490.6
													region	OCN	DEG-rs	9.67878	44490.6
													region	OCN	DEG-rs	9.67878	44498
													region	PAS	DEG-rs	9.67878	44498
													region	PAS	DEG-rs	9.67878	44505.5
													region	LAC	DEG-rs	9.67878	44505.5
													region	LAC	DEG-rs	9.67878	44527.8
													region	USA	SHG-rs	9.67878	44527.8
													region	USA	SHG-rs	9.67878	44691.8
													region	CAN	SHG-rs	9.67878	44691.8
													region	CAN	SHG-rs	9.67878	44736.4
													region	WEU	SHG-rs	9.67878	44736.4
													region	WEU	SHG-rs	9.67878	44809.6
													region	EEU	SHG-rs	9.67878	44809.6
													region	EEU	SHG-rs	9.67878	44831.9
													region	FSU	SHG-rs	9.67878	44831.9
													region	FSU	SHG-rs	9.67878	45048
													region	NAF	SHG-rs	9.67878	45048
													region	NAF	SHG-rs	9.67878	45134.3
													region	EAF	SHG-rs	9.67878	45134.3
													region	EAF	SHG-rs	9.67878	45141.7
													region	WCA	SHG-rs	9.67878	45141.7
													region	WCA	SHG-rs	9.67878	45171.5
													region	SAF	SHG-rs	9.67878	45171.5
													region	SAF	SHG-rs	9.67878	45258.8
													region	MEE	SHG-rs	9.67878	45258.8
													region	MEE	SHG-rs	9.67878	45273.8
													region	CHN	SHG-rs	9.67878	45273.8
													region	CHN	SHG-rs	9.67878	45527.8
													region	OEA	SHG-rs	9.67878	45527.8
													region	OEA	SHG-rs	9.67878	45535.2
													region	IND	SHG-rs	9.67878	45535.2
													region	IND	SHG-rs	9.67878	45542.7
													region	OSA	SHG-rs	9.67878	45542.7
													region	OSA	SHG-rs	9.67878	45565
													region	OCN	SHG-rs	9.67878	45565
													region	OCN	SHG-rs	9.67878	45618.8
													region	PAS	SHG-rs	9.67878	45618.8
													region	PAS	SHG-rs	9.67878	45626.2
													region	LAC	SHG-rs	9.67878	45626.2
													region	LAC	SHG-rs	9.67878	45998.6
													region	USA	CMG-rs	11.3619	45998.6
													region	USA	CMG-rs	11.3619	46065.7
													region	CAN	CMG-rs	11.3619	46065.7
													region	CAN	CMG-rs	11.3619	46088
													region	WEU	CMG-rs	11.3619	46088
													region	WEU	CMG-rs	11.3619	46110.4
													region	EEU	CMG-rs	11.3619	46110.4
													region	EEU	CMG-rs	11.3619	46117.8
													region	FSU	CMG-rs	11.3619	46117.8
													region	FSU	CMG-rs	11.3619	46192.3
													region	NAF	CMG-rs	11.3619	46192.3
													region	NAF	CMG-rs	11.3619	46207.3
													region	EAF	CMG-rs	11.3619	46207.3
													region	EAF	CMG-rs	11.3619	46214.7
													region	WCA	CMG-rs	11.3619	46214.7
													region	WCA	CMG-rs	11.3619	46222.1
													region	SAF	CMG-rs	11.3619	46222.1
													region	SAF	CMG-rs	11.3619	46229.6
													region	MEE	CMG-rs	11.3619	46229.6
													region	MEE	CMG-rs	11.3619	46237
													region	CHN	CMG-rs	11.3619	46237
													region	CHN	CMG-rs	11.3619	46296.6
													region	OEA	CMG-rs	11.3619	46296.6
													region	OEA	CMG-rs	11.3619	46298.1
													region	IND	CMG-rs	11.3619	46298.1
													region	IND	CMG-rs	11.3619	46320.5
													region	OSA	CMG-rs	11.3619	46320.5
													region	OSA	CMG-rs	11.3619	46324.9
													region	JPN	CMG-rs	11.3619	46324.9
													region	JPN	CMG-rs	11.3619	46329.4
													region	OCN	CMG-rs	11.3619	46329.4
													region	OCN	CMG-rs	11.3619	46344.3
													region	PAS	CMG-rs	11.3619	46344.3
													region	PAS	CMG-rs	11.3619	46348.8
													region	LAC	CMG-rs	11.3619	46348.8
													region	LAC	CMG-rs	11.3619	46371.2
													region	USA	TIG-rs	11.3619	46371.2
													region	USA	TIG-rs	11.3619	46427.8
													region	CAN	TIG-rs	11.3619	46427.8
													region	CAN	TIG-rs	11.3619	46460.6
													region	WEU	TIG-rs	11.3619	46460.6
													region	WEU	TIG-rs	11.3619	46468.1
													region	EEU	TIG-rs	11.3619	46468.1
													region	EEU	TIG-rs	11.3619	46475.5
													region	FSU	TIG-rs	11.3619	46475.5
													region	FSU	TIG-rs	11.3619	46527.7
													region	NAF	TIG-rs	11.3619	46527.7
													region	NAF	TIG-rs	11.3619	46542.6
													region	EAF	TIG-rs	11.3619	46542.6
													region	EAF	TIG-rs	11.3619	46550
													region	WCA	TIG-rs	11.3619	46550
													region	WCA	TIG-rs	11.3619	46572.4
													region	SAF	TIG-rs	11.3619	46572.4
													region	SAF	TIG-rs	11.3619	46579.8
													region	MEE	TIG-rs	11.3619	46579.8
													region	MEE	TIG-rs	11.3619	46609.6
													region	CHN	TIG-rs	11.3619	46609.6
													region	CHN	TIG-rs	11.3619	46617.1
													region	OEA	TIG-rs	11.3619	46617.1
													region	OEA	TIG-rs	11.3619	46624.5
													region	IND	TIG-rs	11.3619	46624.5
													region	IND	TIG-rs	11.3619	46631.9
													region	OSA	TIG-rs	11.3619	46631.9
													region	OSA	TIG-rs	11.3619	46646.9
													region	OCN	TIG-rs	11.3619	46646.9
													region	OCN	TIG-rs	11.3619	46654.3
													region	PAS	TIG-rs	11.3619	46654.3
													region	PAS	TIG-rs	11.3619	46669.2
													region	LAC	TIG-rs	11.3619	46669.2
													region	LAC	TIG-rs	11.3619	46691.6
													region	USA	DEG-rs	11.3619	46691.6
													region	USA	DEG-rs	11.3619	46758.7
													region	CAN	DEG-rs	11.3619	46758.7
													region	CAN	DEG-rs	11.3619	46773.6
													region	WEU	DEG-rs	11.3619	46773.6
													region	WEU	DEG-rs	11.3619	46781
													region	EEU	DEG-rs	11.3619	46781
													region	EEU	DEG-rs	11.3619	46788.5
													region	FSU	DEG-rs	11.3619	46788.5
													region	FSU	DEG-rs	11.3619	46863
													region	NAF	DEG-rs	11.3619	46863
													region	NAF	DEG-rs	11.3619	46885.3
													region	EAF	DEG-rs	11.3619	46885.3
													region	EAF	DEG-rs	11.3619	46892.8
													region	WCA	DEG-rs	11.3619	46892.8
													region	WCA	DEG-rs	11.3619	46915.1
													region	SAF	DEG-rs	11.3619	46915.1
													region	SAF	DEG-rs	11.3619	46922.6
													region	MEE	DEG-rs	11.3619	46922.6
													region	MEE	DEG-rs	11.3619	46944.9
													region	CHN	DEG-rs	11.3619	46944.9
													region	CHN	DEG-rs	11.3619	46952.4
													region	OEA	DEG-rs	11.3619	46952.4
													region	OEA	DEG-rs	11.3619	46953.9
													region	IND	DEG-rs	11.3619	46953.9
													region	IND	DEG-rs	11.3619	46961.3
													region	OSA	DEG-rs	11.3619	46961.3
													region	OSA	DEG-rs	11.3619	46976.2
													region	OCN	DEG-rs	11.3619	46976.2
													region	OCN	DEG-rs	11.3619	46983.7
													region	PAS	DEG-rs	11.3619	46983.7
													region	PAS	DEG-rs	11.3619	46991.1
													region	LAC	DEG-rs	11.3619	46991.1
													region	LAC	DEG-rs	11.3619	47013.5
													region	USA	SHG-rs	11.3619	47013.5
													region	USA	SHG-rs	11.3619	47177.4
													region	CAN	SHG-rs	11.3619	47177.4
													region	CAN	SHG-rs	11.3619	47222.1
													region	WEU	SHG-rs	11.3619	47222.1
													region	WEU	SHG-rs	11.3619	47295.2
													region	EEU	SHG-rs	11.3619	47295.2
													region	EEU	SHG-rs	11.3619	47317.6
													region	FSU	SHG-rs	11.3619	47317.6
													region	FSU	SHG-rs	11.3619	47533.6
													region	NAF	SHG-rs	11.3619	47533.6
													region	NAF	SHG-rs	11.3619	47619.9
													region	EAF	SHG-rs	11.3619	47619.9
													region	EAF	SHG-rs	11.3619	47627.3
													region	WCA	SHG-rs	11.3619	47627.3
													region	WCA	SHG-rs	11.3619	47657.1
													region	SAF	SHG-rs	11.3619	47657.1
													region	SAF	SHG-rs	11.3619	47744.5
													region	MEE	SHG-rs	11.3619	47744.5
													region	MEE	SHG-rs	11.3619	47759.4
													region	CHN	SHG-rs	11.3619	47759.4
													region	CHN	SHG-rs	11.3619	48013.4
													region	OEA	SHG-rs	11.3619	48013.4
													region	OEA	SHG-rs	11.3619	48020.9
													region	IND	SHG-rs	11.3619	48020.9
													region	IND	SHG-rs	11.3619	48028.3
													region	OSA	SHG-rs	11.3619	48028.3
													region	OSA	SHG-rs	11.3619	48050.7
													region	OCN	SHG-rs	11.3619	48050.7
													region	OCN	SHG-rs	11.3619	48104.4
													region	PAS	SHG-rs	11.3619	48104.4
													region	PAS	SHG-rs	11.3619	48111.9
													region	LAC	SHG-rs	11.3619	48111.9
													region	LAC	SHG-rs	11.3619	48484.2
													region	USA	CMG-rs	13.2134	48484.2
													region	USA	CMG-rs	13.2134	48534.5
													region	CAN	CMG-rs	13.2134	48534.5
													region	CAN	CMG-rs	13.2134	48551.3
													region	WEU	CMG-rs	13.2134	48551.3
													region	WEU	CMG-rs	13.2134	48568.1
													region	EEU	CMG-rs	13.2134	48568.1
													region	EEU	CMG-rs	13.2134	48573.6
													region	FSU	CMG-rs	13.2134	48573.6
													region	FSU	CMG-rs	13.2134	48629.5
													region	NAF	CMG-rs	13.2134	48629.5
													region	NAF	CMG-rs	13.2134	48640.7
													region	EAF	CMG-rs	13.2134	48640.7
													region	EAF	CMG-rs	13.2134	48646.3
													region	WCA	CMG-rs	13.2134	48646.3
													region	WCA	CMG-rs	13.2134	48651.9
													region	SAF	CMG-rs	13.2134	48651.9
													region	SAF	CMG-rs	13.2134	48657.5
													region	MEE	CMG-rs	13.2134	48657.5
													region	MEE	CMG-rs	13.2134	48663
													region	CHN	CMG-rs	13.2134	48663
													region	CHN	CMG-rs	13.2134	48707.7
													region	OEA	CMG-rs	13.2134	48707.7
													region	OEA	CMG-rs	13.2134	48708.9
													region	IND	CMG-rs	13.2134	48708.9
													region	IND	CMG-rs	13.2134	48725.6
													region	OSA	CMG-rs	13.2134	48725.6
													region	OSA	CMG-rs	13.2134	48729
													region	JPN	CMG-rs	13.2134	48729
													region	JPN	CMG-rs	13.2134	48732.3
													region	OCN	CMG-rs	13.2134	48732.3
													region	OCN	CMG-rs	13.2134	48743.5
													region	PAS	CMG-rs	13.2134	48743.5
													region	PAS	CMG-rs	13.2134	48746.9
													region	LAC	CMG-rs	13.2134	48746.9
													region	LAC	CMG-rs	13.2134	48763.7
													region	USA	TIG-rs	13.2134	48763.7
													region	USA	TIG-rs	13.2134	48806.1
													region	CAN	TIG-rs	13.2134	48806.1
													region	CAN	TIG-rs	13.2134	48830.7
													region	WEU	TIG-rs	13.2134	48830.7
													region	WEU	TIG-rs	13.2134	48836.3
													region	EEU	TIG-rs	13.2134	48836.3
													region	EEU	TIG-rs	13.2134	48841.9
													region	FSU	TIG-rs	13.2134	48841.9
													region	FSU	TIG-rs	13.2134	48881
													region	NAF	TIG-rs	13.2134	48881
													region	NAF	TIG-rs	13.2134	48892.2
													region	EAF	TIG-rs	13.2134	48892.2
													region	EAF	TIG-rs	13.2134	48897.8
													region	WCA	TIG-rs	13.2134	48897.8
													region	WCA	TIG-rs	13.2134	48914.6
													region	SAF	TIG-rs	13.2134	48914.6
													region	SAF	TIG-rs	13.2134	48920.1
													region	MEE	TIG-rs	13.2134	48920.1
													region	MEE	TIG-rs	13.2134	48942.5
													region	CHN	TIG-rs	13.2134	48942.5
													region	CHN	TIG-rs	13.2134	48948.1
													region	OEA	TIG-rs	13.2134	48948.1
													region	OEA	TIG-rs	13.2134	48953.7
													region	IND	TIG-rs	13.2134	48953.7
													region	IND	TIG-rs	13.2134	48959.2
													region	OSA	TIG-rs	13.2134	48959.2
													region	OSA	TIG-rs	13.2134	48970.4
													region	OCN	TIG-rs	13.2134	48970.4
													region	OCN	TIG-rs	13.2134	48976
													region	PAS	TIG-rs	13.2134	48976
													region	PAS	TIG-rs	13.2134	48987.2
													region	LAC	TIG-rs	13.2134	48987.2
													region	LAC	TIG-rs	13.2134	49004
													region	USA	DEG-rs	13.2134	49004
													region	USA	DEG-rs	13.2134	49054.3
													region	CAN	DEG-rs	13.2134	49054.3
													region	CAN	DEG-rs	13.2134	49065.5
													region	WEU	DEG-rs	13.2134	49065.5
													region	WEU	DEG-rs	13.2134	49071
													region	EEU	DEG-rs	13.2134	49071
													region	EEU	DEG-rs	13.2134	49076.6
													region	FSU	DEG-rs	13.2134	49076.6
													region	FSU	DEG-rs	13.2134	49132.5
													region	NAF	DEG-rs	13.2134	49132.5
													region	NAF	DEG-rs	13.2134	49149.3
													region	EAF	DEG-rs	13.2134	49149.3
													region	EAF	DEG-rs	13.2134	49154.9
													region	WCA	DEG-rs	13.2134	49154.9
													region	WCA	DEG-rs	13.2134	49171.6
													region	SAF	DEG-rs	13.2134	49171.6
													region	SAF	DEG-rs	13.2134	49177.2
													region	MEE	DEG-rs	13.2134	49177.2
													region	MEE	DEG-rs	13.2134	49194
													region	CHN	DEG-rs	13.2134	49194
													region	CHN	DEG-rs	13.2134	49199.6
													region	OEA	DEG-rs	13.2134	49199.6
													region	OEA	DEG-rs	13.2134	49200.7
													region	IND	DEG-rs	13.2134	49200.7
													region	IND	DEG-rs	13.2134	49206.3
													region	OSA	DEG-rs	13.2134	49206.3
													region	OSA	DEG-rs	13.2134	49217.4
													region	OCN	DEG-rs	13.2134	49217.4
													region	OCN	DEG-rs	13.2134	49223
													region	PAS	DEG-rs	13.2134	49223
													region	PAS	DEG-rs	13.2134	49228.6
													region	LAC	DEG-rs	13.2134	49228.6
													region	LAC	DEG-rs	13.2134	49245.4
													region	USA	SHG-rs	13.2134	49245.4
													region	USA	SHG-rs	13.2134	49368.3
													region	CAN	SHG-rs	13.2134	49368.3
													region	CAN	SHG-rs	13.2134	49401.8
													region	WEU	SHG-rs	13.2134	49401.8
													region	WEU	SHG-rs	13.2134	49456.7
													region	EEU	SHG-rs	13.2134	49456.7
													region	EEU	SHG-rs	13.2134	49473.5
													region	FSU	SHG-rs	13.2134	49473.5
													region	FSU	SHG-rs	13.2134	49635.5
													region	NAF	SHG-rs	13.2134	49635.5
													region	NAF	SHG-rs	13.2134	49700.2
													region	EAF	SHG-rs	13.2134	49700.2
													region	EAF	SHG-rs	13.2134	49705.8
													region	WCA	SHG-rs	13.2134	49705.8
													region	WCA	SHG-rs	13.2134	49728.1
													region	SAF	SHG-rs	13.2134	49728.1
													region	SAF	SHG-rs	13.2134	49793.6
													region	MEE	SHG-rs	13.2134	49793.6
													region	MEE	SHG-rs	13.2134	49804.8
													region	CHN	SHG-rs	13.2134	49804.8
													region	CHN	SHG-rs	13.2134	49995.3
													region	OEA	SHG-rs	13.2134	49995.3
													region	OEA	SHG-rs	13.2134	50000.9
													region	IND	SHG-rs	13.2134	50000.9
													region	IND	SHG-rs	13.2134	50006.5
													region	OSA	SHG-rs	13.2134	50006.5
													region	OSA	SHG-rs	13.2134	50023.3
													region	OCN	SHG-rs	13.2134	50023.3
													region	OCN	SHG-rs	13.2134	50063.6
													region	PAS	SHG-rs	13.2134	50063.6
													region	PAS	SHG-rs	13.2134	50069.2
													region	LAC	SHG-rs	13.2134	50069.2
													region	LAC	SHG-rs	13.2134	50348.4
													region	USA	HYG-rs	13.2134	50348.4
													region	USA	HYG-rs	13.2134	50834.7
													region	CAN	HYG-rs	13.2134	50834.7
													region	CAN	HYG-rs	13.2134	51116.4
													region	WEU	HYG-rs	13.2134	51116.4
													region	WEU	HYG-rs	13.2134	51582
													region	FSU	HYG-rs	13.2134	51582
													region	FSU	HYG-rs	13.2134	51901.7
													region	NAF	HYG-rs	13.2134	51901.7
													region	NAF	HYG-rs	13.2134	51929.8
													region	EAF	HYG-rs	13.2134	51929.8
													region	EAF	HYG-rs	13.2134	52238
													region	WCA	HYG-rs	13.2134	52238
													region	WCA	HYG-rs	13.2134	52655
													region	SAF	HYG-rs	13.2134	52655
													region	SAF	HYG-rs	13.2134	53067.6
													region	MEE	HYG-rs	13.2134	53067.6
													region	MEE	HYG-rs	13.2134	53079.5
													region	CHN	HYG-rs	13.2134	53079.5
													region	CHN	HYG-rs	13.2134	53135.7
													region	OEA	HYG-rs	13.2134	53135.7
													region	OEA	HYG-rs	13.2134	53219.5
													region	IND	HYG-rs	13.2134	53219.5
													region	IND	HYG-rs	13.2134	53415.8
													region	OSA	HYG-rs	13.2134	53415.8
													region	OSA	HYG-rs	13.2134	53525
													region	JPN	HYG-rs	13.2134	53525
													region	JPN	HYG-rs	13.2134	53539.6
													region	OCN	HYG-rs	13.2134	53539.6
													region	OCN	HYG-rs	13.2134	53750.5
													region	PAS	HYG-rs	13.2134	53750.5
													region	PAS	HYG-rs	13.2134	54562.7
													region	LAC	HYG-rs	13.2134	54562.7
													region	LAC	HYG-rs	13.2134	55348.4

## Sheet: 2. Oil data summary (vs GEA)
	Reservoir type	Reserves/ Resources	Quantity		Cost
			Value (EJ)	Assumption	Value ($US/GJ)	Assumption
OIL	Conventional oil	Reserves	6741 (+23%)	Sources: BGR, USGS	0.87 – 5.21	-
		Resources	9524 (+55%)	Sources: BGR, USGS	0.87 – 5.21	-
	Sub-total		16265 (+40%)		0.87 – 5.21
	Oil sands	Reserves	1910	RR: 100%	5.26 – 9.65	+ 15$/bbl
		Resources	9010	RR: 33%	10.52 – 28.84	+ 15$/bbl
	Heavy and Extra-heavy oil	Reserves	343	RR: 100%	5.26 – 9.65	+ 15$/bbl
		Resources	3344 (-9%)	RR: 30%	10.52 – 28.84	+ 15$/bbl
	Shale oil	Reserves	1492	RR: 100%	3.95 – 10.53	x 1.5
		Resources	8646 (+52%)	RR: 50%	11.84 – 39.32	x 1.5
	Sub-total		24745 (+12%)		3.95 – 39.32
	Total		41011 (+21%)		0.87 – 39.32
	LEGEND
	RR	Recovery rate

## Sheet: 3. Gas data summary (vs GEA)
	Reservoir type	Reserves/ Resources	Quantity		Cost
			Value (EJ)	Assumption	Value ($US/GJ)	Assumption
GAS	Conventional gas	Reserves	7101 (+41%)	Sources: BGR, USGS	0.35 – 3.48	-
		Resources	10651 (+48%)	Sources: BGR, USGS	0.35 – 3.48	-
	Sub-total		17752 (+45%)		0.35 – 3.48
	CBM	Reserves	4063	RR: 100%	3.00 – 5.55	-
		Resources	1863	RR: 20%	6.76 – 13.21	-
	Deep gas	Reserves	4065	RR: 100%	3.00 – 5.55	-
		Resources	1609	RR: 20%	6.76 – 13.21	-
	Tight gas	Reserves	5740	RR: 100%	3.00 – 5.55	-
		Resources	1602	RR: 20%	6.76 – 13.21	-
	Shale gas	Reserves	6300	RR: 100%	3.00 – 5.55	-
		Resources	7102 (+138%)	MAX(GEA, ARI)	6.76 – 13.21	-
	Hydrates	Reserves	0	-		-
		Resources	5000	-	13.21	-
	Sub-total		37345 (+12%)		3.00 – 13.21
	Total		55097 (+21%)		0.35 – 13.21
	LEGEND
	RR	Recovery rate

## Sheet: 4. Oil - Resources
	Oil resource data														Assumptions
#	Region code	Conventional		Unconventional											Conventional						Unconventional oil
		oil		oil		Oil sands		Heavy and Extra-heavy oil		Shale oil					oil						Oil sands			Heavy and Extra-heavy oil			Shale oil
		Reserves (EJ)	Resources (EJ)	Reserves (EJ)	Resources (EJ)	Reserves (EJ)	Resources (EJ)	Reserves (EJ)	Resources (EJ)	Reserves (EJ)	Resources (EJ)				Factor	Resources (EJ)	C	Factor	Resources (EJ)	C	Recovery rate	Resources (EJ)	C	Recovery rate	Resources (EJ)	C	Recovery rate	Resources (EJ)	C
1	USA	162	538.238	1435.65	7757.9	0	81.5861	66.5701	1363.33	1369.08	6312.98				1	162	1	1.28152	420	1,2	0.33	247.231	-	0.3	4544.44	4	0.5	12626	5
2	CAN	28	390.89	1149.32	4206.29	1149.28	3390.28	0.041868	769.953	0	46.0548				1	28	1	3.87019	101	1,2	0.33	10273.6	-	0.3	2566.51	4	0.5	92.1096	5
3	WEU	88	379.85	8.20613	292.028	1.38164	1.46454	1.08857	7.28503	5.73592	283.279				1	88	1	2.04221	186	1,2	0.33	4.43801	-	0.3	24.2834	4	0.5	566.558	5
4	EEU	6	26.5487	0.334944	2.01594	0	0.483575	0.251208	0.150725	0.083736	1.38164				1	6	1	2.04221	13	1,2	0.33	1.46538	-	0.3	0.502416	4	0.5	2.76329	5
5	FSU	735	1493.43	759.234	3477.09	748.139	2497.24	0.879228	3.24058	10.2158	976.613				1	735	1	1.48158	1008	1,2	0.33	7567.39	-	0.3	10.8019	4	0.5	1953.23	5
6	NAF	388	433.003	6.61514	192.823	0	0	0.334944	4.77295	6.2802	188.05				1	388	1	2.35328	184	1,2	0.33	0	-	0.3	15.9098	4	0.5	376.1	5
7	EAF	4	22.457	1.46538	1.63829	1.46538	1.53362	0	0	0	0.10467				1	4	1	1.72746	13	1,2	0.33	4.64735	-	0.3	0	4	0.5	0.20934	5
8	WCA	254	521.693	4.0612	303.793	4.0612	4.22783	0	0	0	299.566				1	254	1	1.72746	302	1,2	0.33	12.8116	-	0.3	0	4	0.5	599.131	5
9	SAF	77	259.119	3.09823	3.61698	3.09823	3.21923	0	0	0	0.397746				1	77	1	1.72746	150	1,2	0.33	9.75524	-	0.3	0	4	0.5	0.795492	5
10	MEE	4286	2092.06	55.3076	1221.88	0	0	0.041868	1100.54	55.2658	121.333				1	4286	1	2.35328	889	1,2	0.33	0	-	0.3	3668.47	4	0.5	242.667	5
11	CHN	84	181.14	12.9791	119.343	0	1.22966	4.98229	70.175	7.99679	47.9389				1	84	1	1.86742	97	1,2	0.33	3.72625	-	0.3	233.917	4	0.5	95.8777	5
12	OEA	26	59.7575	0	18.715	0	0	0	17.8358	0	0.879228				1	26	1	1.86742	32	1,2	0.33	0	-	0.3	59.4526	4	0.5	1.75846	5
13	IND	33	34.6606	0	5.40097	0	0	0	5.40097	0	0				1	33	1	2.03886	17	1,2	0.33	0	-	0.3	18.0032	4	0.5	0	5
14	OSA	2	26.5052	0	0	0	0	0	0	0	0				1	2	1	2.03886	13	1,2	0.33	0	-	0.3	0	4	0.5	0	5
15	JPN	0	0	0	0	0	0	0	0	0	0				1	0	1	0	0	1,2	0.33	0	-	0.3	0	4	0.5	0	5
16	OCN	24	82.1665	21.6876	94.9148	0	0	0	0	21.6876	94.9148				1	24	1	1.86742	44	1,2	0.33	0	-	0.3	0	4	0.5	189.83	5
17	PAS	65	164.333	13.1047	28.2299	2.93076	3.06725	0	0	10.1739	25.1627				1	65	1	1.86742	88	1,2	0.33	9.2947	-	0.3	0	4	0.5	50.3253	5
18	LAC	479	1681.14	274.528	3273.95	0	3025.8	268.918	1.25604	5.61031	246.896				1	479	1	2.73801	614	1,2	0.33	9169.09	-	0.3	4.1868	4	0.5	493.791	5
19	SOO	0	0	0	0	0	0	0	0	0	0				1	0	-	1	0	-	0.33	0	-	0.3	0	4	0.5	0	5
20	ARC	0	1137.5	0	0	0	0	0	0	0	0				1	0	-	1.48158	767.761	3	0.33	0	-	0.3	0	4	0.5	0	5
	SUB-TOTAL	6741	9524.49	3745.6	20999.6	1910.35	9010.13	343.108	3343.94	1492.13	8645.55				C stands for comments (see below)
	TOTAL	16265.5		24745.2
	Grand TOTAL	41010.7													Comments
	Legend														#	Reference	Comment
	Reserves														1	1, 2	Using the most recent BGR data instead of USGS data (as reported in GEA Table 7.6 chap.7 p. 440)
	Resources														2	4, EJ	Using USGS Potential additions to conventional oil resources. Adding a quantity equal to P5-mean on top of BGR data (BGR data and USGS mean data match well). This is done by calculating an equivalent factor applied to the original GEA data.
															3	1, 3	Using the default GEA data (e.g. USGS Arctic data since no value was provided by BGR)
															4	8, EJ	Recovery rate for extra-heavy oil resources set to 30%. WEO, 2008 says that extra-heavy oil and tar sands require similar extraction technologies. The largest recovery factor is 32% for tar sands in North America (Table 9.4 p. 216 in WEO, 2008). Since most extra-heavy oil is located in Venezuela we take a value of 30%.
															5	9, EJ	Recovery rate for shale oil resources can be as high as 60% according to RAND, 2005 (Chap 2 p. 8). We take a conservative value of 50% here.
															References are listed in tab 'References' - Grey cells indicate default GEA assumptions/data - EJ: Expert judgement

## Sheet: 5. Oil - Production costs
	Oil production costs data									Assumptions
#	Reservoir type	Category	Regional distinction	Production costs ($/GJ)		# cost bins				#	Reservoir type	Category	Regional distinction	GEA extraction costs ($/GJ)		# cost bins	Cost multiplier	Cost mark-up ($/GJ)	C
				Min	Max									Min	Max
1	Conventional oil	Reserves	all	0.87	5.21	4				1	Conventional oil	Reserves	all	0.87	5.21	4	1	0
2		Resources	all	0.87	5.21	4				2		Resources	all	0.87	5.21	4	1	0
-	Unconventional	Reserves	all	3.945	10.53	6				-	Unconventional	Reserves	all	2.63	7.02	6	-	-
-		Resources	all	10.52	39.315	8				-		Resources	all	7.89	26.21	8	-	-
3	Oil sands	Reserves	all	5.26	9.65	6				3	Oil sands	Reserves	all	2.63	7.02	6	0	2.63	1
4		Resources	all	10.52	28.84	8				4		Resources	all	7.89	26.21	8	0	2.63	1
5	Heavy and Extra-heavy oil	Reserves	all	5.26	9.65	6				5	Heavy and Extra-heavy oil	Reserves	all	2.63	7.02	6	0	2.63	1
6		Resources	all	10.52	28.84	8				6		Resources	all	7.89	26.21	8	0	2.63	1
7	Shale oil	Reserves	all	3.945	10.53	6				7	Shale oil	Reserves	all	2.63	7.02	6	1.5	0	2
8		Resources	all	11.835	39.315	8				8		Resources	all	7.89	26.21	8	1.5	0	2
										C stands for comments (see below)
										Comments
										#	Reference	Comment
										1	10, EJ	Upgrading costs were not included in the GEA data. Bob Tippee, 2012 showed that these costs can reach US$ 28.57. Here we add a cost mark-up of 15$ per barrel to account for transformation into syncrude.
										2	10, EJ	Upgrading costs were not included in the GEA data. Bob Tippee, 2012 showed that these costs can reach US$ 28.57. Here we increase costs by 50% to account for transformation into syncrude
										References are listed in tab 'References' - Grey cells indicate default GEA assumptions/data - EJ: Expert judgement

## Sheet: 6. Gas - Resources
	Gas resource data																		Assumptions
#	Region code	Conventional		Unconventional															Conventional						Unconventional gas
		Gas		Gas		Deep Gas		Coal-bed methane		Tight gas		Shale gas		Gas hydrates					Gas						Deep Gas			Coal-bed methane			Tight gas			Shale gas			Gas hydrates
		Reserves (EJ)	Resources (EJ)	Reserves (EJ)	Resources (EJ)	Reserves (EJ)	Resources (EJ)	Reserves (EJ)	Resources (EJ)	Reserves (EJ)	Resources (EJ)	Reserves (EJ)	Resources (EJ)	Reserves (EJ)	Resources (EJ)				Factor	Reserves (EJ)	C	Factor	Resources (EJ)	C	Recovery rate	Resources (EJ)	C	Recovery rate	Resources (EJ)	C	Recovery rate	Resources (EJ)	C	Recovery rate	Resources (EJ)	C	Recovery rate	Resources (EJ)	C
1	USA	262	740	4657	2259.83	745	335.4	931	335.4	1118	283.2	1863	819.6	0	486.232				1	262	1	1	740	1	0.2	1677	-	0.2	1677	-	0.2	1416	-	0.2	4098	3	0.395632	1229	4
2	CAN	65	259	1192	855.43	186	74.6	261	111.8	559	164	186	223.34	0	281.69				1	65	1	1	259	1	0.2	373	-	0.2	559	-	0.2	820	-	0.598767	373	3	0.395632	712	4
3	WEU	162	313	746	1059.86	112	37.2	261	111.8	149	37.2	224	408	0	465.659				1	162	1	1	313	1	0.2	186	-	0.2	559	-	0.2	186	-	0.729875	559	3	0.395632	1177	4
4	EEU	31	23	560	376.6	112	37.2	75	37.2	149	37.2	224	265	0	0				1	31	1	1	23	1	0.2	186	-	0.2	186	-	0.2	186	-	0.474061	559	3	0.395632	0	4
5	FSU	2352	4332	5141	2406.07	1118	372.6	745	372.6	1043	260.8	2235	1080.4	0	319.671				1	2352	1	1	4332	1	0.2	1863	-	0.2	1863	-	0.2	1304	-	0.2	5402	3	0.395632	808	4
6	NAF	310	324	969	720.34	373	111.8	149	74.6	298	74.6	149	431.25	0	28.0899				1	310	1	1	324	1	0.2	559	-	0.2	373	-	0.2	373	-	1.15617	373	3	0.395632	71	4
7	EAF	1	22	411	456.997	112	37.2	75	37.2	149	37.2	75	37.2	0	308.197				1	1	1	1	22	1	0.2	186	-	0.2	186	-	0.2	186	-	0.2	186	3	0.395632	779	4
8	WCA	213	183	1081	826.796	261	111.8	75	37.2	447	111.8	298	149	0	416.996				1	213	1	1	183	1	0.2	559	-	0.2	186	-	0.2	559	-	0.2	745	3	0.395632	1054	4
9	SAF	21	70	337	960.919	75	37.2	75	37.2	112	37.2	75	436.675	0	412.644				1	21	1	1	70	1	0.2	186	-	0.2	186	-	0.2	186	-	2.34772	186	3	0.395632	1043	4
10	MEE	2788	1309	1044	384.469	261	111.8	75	37.2	559	149	149	74.6	0	11.869				1	2788	1	1	1309	1	0.2	559	-	0.2	186	-	0.2	745	-	0.2	373	3	0.395632	30	4
11	CHN	91	370	821	1698.7	75	37.2	559	298	112	37.2	75	1270.12	0	56.1798				1	91	1	1	370	1	0.2	186	-	0.2	1490	-	0.2	186	-	6.82863	186	3	0.395632	142	4
12	OEA	26	60	187	173.074	0	7.4	0	7.4	112	37.2	75	37.2	0	83.874				1	26	1	1	60	1	0.2	37	-	0.2	37	-	0.2	186	-	0.2	186	3	0.395632	212	4
13	IND	41	33	523	419.634	75	37.2	261	111.8	112	37.2	75	37.2	0	196.234				1	41	1	1	33	1	0.2	186	-	0.2	559	-	0.2	186	-	0.2	186	3	0.395632	496	4
14	OSA	49	81	671	392.594	186	74.6	37	22.4	224	74.6	224	111.8	0	109.194				1	49	1	1	81	1	0.2	373	-	0.2	112	-	0.2	373	-	0.2	559	3	0.395632	276	4
15	JPN	1	0	37	37.0384	0	0	37	22.4	0	0	0	0	0	14.6384				1	1	1	1	0	1	0.2	0	-	0.2	112	-	0.2	0	-	0.2	0	3	0.395632	37	4
16	OCN	115	78	559	628.652	75	37.2	186	74.6	149	37.2	149	268.78	0	210.872				1	115	1	1	78	1	0.2	186	-	0.2	373	-	0.2	186	-	0.72059	373	3	0.395632	533	4
17	PAS	274	304	411	983.633	75	37.2	37	22.4	224	74.6	75	37.2	0	812.233				1	274	1	1	304	1	0.2	186	-	0.2	112	-	0.2	373	-	0.2	186	3	0.395632	2053	4
18	LAC	299	402	821	2982.96	224	111.8	224	111.8	224	111.8	149	1861.83	0	785.726				1	299	1	1	402	1	0.2	559	-	0.2	559	-	0.2	559	-	4.9915	373	3	0.395632	1986	4
19	SOO	0	0	0	0	0	0	0	0	0	0	0	0	0	0				1	0	-	1	0	-	0.2	0	-	0.2	0	-	0.2	0	-	0.2	0	3	0.395632	0	4
20	ARC	0	1748.3	0	0	0	0	0	0	0	0	0	0	0	0				1	0	-	1	1748.3	1,2	0.2	0	-	0.2	0	-	0.2	0	-	0.2	0	3	0.395632	0	4
	SUB-TOTAL	7101	10651.3	20168	17623.6	4065	1609.4	4063	1863	5740	1602	6300	7549.2	0	5000				C stands for comments (see below)
	TOTAL	17752.3		37791.6
	Grand TOTAL	55543.9																	Comments
	Legend																		#	Reference	Comment
	Reserves																		1	1, 2	Using the most recent BGR data instead of USGS data (as reported in GEA Table 7.11 chap.7 p. 453)
	Resources																		2	1, 3	Using the default GEA data (e.g. USGS Arctic data since no value was provided by BGR)
																			3	1, 5, EJ	Using maximum shale gas resource values between ARI (Table 1-3 p. 1-5) and GEA. This translated into a factor applied to the original GEA data.
																			4	1, EJ	Computing recovery rate in agreement with the 5000 EJ limit mentioned and used in GEA (chap. 7 p. 459)
																			References are listed in tab 'References' - Grey cells indicate default GEA assumptions/data - EJ: Expert judgement

## Sheet: 7. Gas - Production costs
	Gas production costs data									Assumptions
#	Reservoir type	Category	Regional distinction	Production costs ($/GJ)		# cost bins				#	Reservoir type	Category	Regional distinction	GEA extraction costs ($/GJ)		# cost bins	Cost multiplier	Cost mark-up ($/GJ)	C
				Min	Max									Min	Max
1	Conventional	Reserves	all	0.35	3.48	4				1	Conventional	Reserves	all	0.35	3.48	4	1	0	-
3		Resources	all	0.35	3.48	4				3		Resources	all	0.35	3.48	4	1	0	-
-	Unconventional	Reserves	all	3	5.55	4				-	Unconventional	Reserves	all	3	5.55	4	-	-	-
-		Resources	all	6.76	13.21	5				-		Resources	all	6.76	13.21	5	-	-	-
5	Deep Gas	Reserves	all	3	5.55	4				5	Deep Gas	Reserves	all	3	5.55	4	1	0	-
6		Resources	all	6.76	13.21	5				6		Resources	all	6.76	13.21	5	1	0	-
7	Coal-bed methane	Reserves	all	3	5.55	4				7	Coal-bed methane	Reserves	all	3	5.55	4	1	0	-
8		Resources	all	6.76	13.21	5				8		Resources	all	6.76	13.21	5	1	0	-
9	Tight gas	Reserves	all	3	5.55	4				9	Tight gas	Reserves	all	3	5.55	4	1	0	-
10		Resources	all	6.76	13.21	5				10		Resources	all	6.76	13.21	5	1	0	-
11	Shale gas	Reserves	all	3	5.55	4				11	Shale gas	Reserves	all	3	5.55	4	1	0	-
12		Resources	all	6.76	13.21	5				12		Resources	all	6.76	13.21	5	1	0	-
13	Gas hydrates	Reserves	all	3	5.55	4				13	Gas hydrates	Reserves	all	3	5.55	4	1	0	-
14		Resources	all	6.76	13.21	5				14		Resources	all	6.76	13.21	5	1	0	-
										C stands for comments (see below)
										Comments
										#	Reference	Comment
										Using default GEA assumptions.
										References are listed in tab 'References' - Grey cells indicate default GEA assumptions/data - EJ: Expert judgement

## Sheet: 8. References
	References
#	Author(s)	Organisation	Publisher	Title	Year	URL
1	Rogner H.-H. et al.	IIASA	IIASA	Global Energy Assessment - Chapter 7	2012	http://www.iiasa.ac.at/web/home/research/researchPrograms/Energy/Chapters_Home.en.html
2	BGR	BGR	BGR	Energierohstoffe 2009	2009	http://www.bgr.bund.de/DE/Themen/Energie/Produkte/energierohstoffe_2009.html
3	Bird K.J. et al.	USGS	USGS	Circum-Arctic Resource Appraisal: Estimates of Undiscovered Oil and Gas North of the Arctic Circle	2008	http://pubs.usgs.gov/fs/2008/3049/
4	Klett T.R. et al.	USGS	USGS	Assessment of Potential Additions to Conventional Oil and Gas Resources of the World (Outside the United States) from Reserve Growth	2012	http://pubs.usgs.gov/fs/2012/3052/
5	Kuuskraa V. et al.	ARI	ARI	World shale gas resources: An initial assessment of 14 regions outside the US	2011	http://www.eia.gov/analysis/studies/worldshalegas/
6	Dyni J.R.	USGS	USGS	Geology and Resources of Some World Oil-Shale Deposits	2005	http://pubs.usgs.gov/sir/2005/5294/
7	Brandt A.R.	U. of Berkley	Environ. Science & Tech.	Converting oil shale to liquid fuels: energy inputs and greenhouse fas emissions of the shell in situ conversion process	2008	http://pubs.acs.org/doi/abs/10.1021/es800531f
8	IEA	IEA	IEA	World Energy Outlook	2008	http://www.worldenergyoutlook.org/publications/2008-1994/
9	RAND	RAND	RAND		2007	www.rand.org/pubs/monographs/2005/RAND_MG414.pdf
10	Tipee B.		Oil & Gas journal	Steady growth seen for Canadian bitumen output despite increasing needs for pipeline capacity, gas	2012	http://www.ogj.com/articles/print/vol-110/issue-5/drilling-production/steady-growth-seen-for-canadian.html
11
12

## Sheet: 9. Definitions
	Definitions
	Reserves
	Resources
	Long-term supply cost curve
	Cumulative Extraction Cost Curve
	Cumulative Availability Curve
	Production cost
	Recovery rate
	Regions	Same as in GEA

[truncated: 1 more sheets: 10. Revision information]
